# Supplementary material
Source: publisher figshare collection journal article supplement (https://gsapubs.figshare.com/ndownloader/files/23319257)
Supplement: Supplementary file 1 [file 23319257]

Archive with 10 entries (10 files):
- FileDR1. Facies, measured sections_updated.pdf
- FileDR10. DZnmf_fact_source_rossetta_stone.xlsx
- FileDR2. Complete Wahlman report.pdf
- FileDR3. DZ_Sample List and new DZ Data.xlsx
- FileDR4. DZstats_input_data.xlsx
- FileDR5. DZnmf_sample groupings.xlsx
- FileDR6. Individual DZ Similarity Statistics.xlsx
- FileDR7. DZ_Locations and Stats tables.xlsx
- FileDR8. PDF_DZnmf_results.xls
- FileDR9. KDE_DZnmf_results.xls
