# Supplementary material
Source: publisher figshare collection journal article supplement (https://gsapubs.figshare.com/ndownloader/files/23319257)
Supplement: Supplementary file 1 [file 23319257 › FileDR3. DZ_Sample List and new DZ Data.xlsx]

## Sheet: Sheet1
Leary, R.J., Umhoefer, P., Smith, M.E., Smith, T.M., Saylor, J.E., Riggs, N., Burr, G., Lodes, E., Foley, D., Licht, A., Mueller, M.A., and Baird, C., 2020, Provenance of Pennsylvanian–Permian sedimentary rocks associated with the Ancestral Rocky Mountains orogeny in southwestern Laurentia: Implications for continental-scale Laurentian sediment transport systems: Lithosphere, https://doi.org/10.1…
Basin	Sample ID	Lat	Lon	Unit	Age	Division	Source	Age Rank
								0-Mississippian; 1-Morrowan-Atokan; 2-Desmoinesian-Virgilian; 3-Wolfcampian; 4-Leonardian-Guadalupian
Arizona Shelf
	2QZ-272	33.6189	114.01	Coconino SS	Leonardian		this study	4
	SY-A	34.8875	-112.053	Schnebly Hill	Leonardian		this study	4
	3PS-100	34.3644	-111.138	Schnebly Hill	Leonardian		this study	4
	4PS-186	34.3711	-111.143	top Schebly Hill	Leonardian		this study	4
	2QZ-9	33.6193	-114.013	Upper Supai	Permian	Early	this study	3
	SY-B	34.8867	-112.055	Hermit	Wolfcampian		this study	3
	1PS-4	34.3481	-111.132	Base Hermit	Wolfcampian		this study	3
	DryCreek	34.9433	-111.8	Supai	Atokan-Missourian		Soreghan et al., 2007	2
	SY-C	34.8856	-112.062	Lowest Esplanade	Wolfcampian		this study	3
	5PS-42	34.3686	-111.394	Naco	Desmoinesian?		this study	2
	5PS-58	34.3686	-111.394	Naco	Missourian?		this study	2
	5PS-82	34.3692	-111.394	Naco	Virgilian?		this study	2
	1QZ19	33.62	-114.015	Basal Supai Fm	Pennsylvanian	Basal	this study	1
	SY-D	34.8847	-112.064	Manakacha	Atokan		this study	1
Grand Canyon (Arizona Shelf)
	Kaibab2	36.8527	-111.607	Kaibab Fm	Guadalupian		Gehrels et al., 2011	4
	Coconino2	36.8238	-111.628	Coconino Fm	Leonardian		Gehrels et al., 2011	4
	Kaibab	36.0437	-111.825	Kaibab Fm	Guadalupian		Gehrels et al., 2011	4
	Toroweap2	36.0584	-112.085	Toroweap Fm	Leonardian		Gehrels et al., 2011	4
	Coconino1	36.0593	-112.144	Coconino Fm	Leonardian		Gehrels et al., 2011	4
	Toroweap1	36.0579	-112.146	Toroweap Fm	Leonardian		Gehrels et al., 2011	4
	Upper_Hermit	36.8074	-111.636	Hermit	Wolfcampian-Leonardian		Gehrels et al., 2011	3
	Lower_Hermit	36.7354	-111.694	Hermit	Wolfcampian-Leonardian		Gehrels et al., 2011	3
	Esplanade	36.7168	-111.709	Esplanade	Wolfcampian		Gehrels et al., 2011	3
	Hermit	36.0632	-112.089	Hermit	Wolfcampian-Leonardian		Gehrels et al., 2011	3
	06GC156	36.3469	-112.89	Esplanade	Wolfcampian		Gehrels et al., 2011	3
	06GC155	36.2935	-112.893	Esplanade	Wolfcampian		Gehrels et al., 2011	3
	B_Wescogame	36.6681	-111.74	Wescogame	Virgilian		Gehrels et al., 2011	2
	Watahomigi	36.0779	-112.092	Watamomigi, Supai Fm	Morrowan		Gehrels et al., 2011	1
	Manakacha1	36.6421	-111.763	Manakacha, Supai Fm	Atokan		Gehrels et al., 2011	1
	Surprise Canyon 3 (06GC149)	36.596	-111.768	Surprise Canyon	Mississippian	upper	Gehrels et al., 2011	0
	Surprise_Cyn2	36.5869	-111.782	Surprise Canyon	Mississippian	upper	Gehrels et al., 2011	0
	Surprise Canyon Cngl	36.0263	-111.98	Surprise Canyon	Mississippian	upper	Gehrels et al., 2011	0
Denver Basin
	CO-PR-2-0	40.8546	-105.17	Lyons	Guadalupian		Nair et al. 2018	4
	MS07	38.8516	-104.877	Lyons (Ingleside of Sweet et al. 2015)	Wolfcampian		this study	3
	OC2-8	40.763	-105.18	lower Ingleside	Wolfcampian		Nair et al. 2018	3
	OC56	40.7642	-105.177	upper Ingleside	Wolfcampian		Nair et al. 2018	3
	MS04	38.8511	-104.885	Upper Fountain	Pennsylvanian	Upper	this study	2
	MS05	38.8467	-104.89	Upper Fountain	Pennsylvanian	Upper	this study	2
	MS06	38.8462	-104.89	Upper Fountain	Pennsylvanian	Middle (sensu Sweet and Soreghan, 2010)	this study	2
	MS11	38.8584	-104.924	Fountain	Pennsylvanian	Middle (sensu Sweet and Soreghan, 2010)	this study	1
	MS10	38.8584	-104.924	Fountain	Pennsylvanian	Lower	this study	1
	MS01	38.8627	-104.915	Glen Eyrie	Atokan	Lower	this study	1
	MSGE313	38.8638	-104.916	Glen Eyrie	Atokan		Siddoway et al., 2014	1
Central Colorado Trough/Eagle Basin
	EC01	39.6656	-106.831	Eagle Valley Evaporite	Desmoinesian	Middle	this study	2
	MC05	39.8847	-107.767	Minturn Fm	Desmoinesian		this study	2
	GS01	39.5317	-107.332	Eagle Valley Fm	Desmoinesian		this study	2
	GS09	39.5306	-107.336	Eagle Valley Fm	Desmoinesian		this study	2
	MC17	39.9144	-107.777	Minturn Fm	Desmoinesian		this study	2
	GS11	39.5037	-107.299	Maroon Fm	Missourian		this study	2
	MC20	39.9145	-107.777	Maroon Fm	Missourian		this study	2
	GS24	39.5059	-107.298	Maroon Fm	Missourian		this study	2
	V18	39.59	-106.342	Minturn Fm	Desmoinesian		this study	2
	V20	39.5859	-106.334	Minturn Fm	Desmoinesian		this study	2																14
	RC01	39.6834	-106.773	Eagle Valley Fm	Desmoinesian		this study	2
	RC19	39.6877	-106.767	Eagle Valley Fm	Desmoinesian		this study	2
	V10	39.5945	-106.338	Minturn Fm	Desmoinesian		this study	2
	V01	39.6058	-106.323	Minturn	Desmoinesian		this study	2
	V22	39.6486	-106.401	Maroon Fm	Missourian		this study	2
	V25	39.65	-106.403	Maroon Fm	Missourian		this study	2
	BC02	38.6615	-105.805	Sharpsdale Fm	Morrowan	Middle	this study	1
	BC01	38.6588	-105.808	Kerber Formation	Pennslyvian	Lower (Atokan?)	this study	1
	CC01	38.83	-106.854	Minturn and Belden (most likely Belden)	Morrowan	Lower	this study	1
	BC05	38.6585	-105.809	Leadville LS	Missippian	Lower	this study	0
Paradox Basin
	12CV50	38.663	109.437	Basal Castle Valley	Leonardian		Lawton et al. 2015	4
	10CVG	38.6653	109.436	Lower Castle Valley	Leonardian		Lawton et al. 2015	4
	10CVR	38.6643	109.436	Lower Castle Valley	Leonardian		Lawton et al. 2015	4
	10CVW	38.6644	109.437	Upper Castle Valley	Leonardian		Lawton et al. 2015	4
	11WRB	37.8894	-110.41	White Rim	Leonardian		Lawton et al. 2015	4
	11WRA	38.4603	-109.794	White Rim	Leonardian		Lawton et al. 2015	4
	HC01	37.366	-107.838	Cutler	Wolfcampian		this study	3
	SM01	38.0555	-107.686	Cutler	Penn-Perm.	Wolfcamp	this study	3
	TP01	38.7328	-109.013	Cutler	Penn_Perm.	Woflcamp	this study	3
	JBO1	38.6609	-108.981	Cutler	Penn_Perm.	Wolfcamp	this study	3
	11CVC	38.6627	-109.435	Cutler underferientiated	Wolfcampian		Lawton et al. 2015	3
	11CT	38.6451	-109.366	Cutler underferientiated	Wolfcampian		Lawton et al. 2015	3
	DMR01	37.6337	-107.814	Pinkerton Trail-Hermosa	Desmoinesian		this study	2
	LC01	37.715	-107.755	Honaker Trail	Missourian		this study	2
	SP01	37.6199	-107.814	Pinkerton Trail-Hermosa	Des Moinesian	Mid Pen	this study	2
	CF02	38.0234	-107.655	Hermosa	Pennsylvanian	Mid-Upper	this study	2
	HT02	37.1838	-109.961	Paradox Fm	Desmonesian		this study	2
	HT14	37.1889	-109.957	Paradox Fm	Desmonesian		this study	2
	HT04	37.1881	-109.954	Lower Honaker Trail	Missourian		this study	2
	HT20	37.1881	-109.954	Honaker Trail	Missourian		this study	2
	HT24	37.1888	-109.952	Honaker Trail	Virgilian		this study	2
	KA03	38.4971	-109.652	Honaker Trail	Missourian		this study	2
	MP-DZ2	37.7433	-107.688	Hermosa	Desmoinesian		Nair et al. 2018	2
	ML01	37.7506	-107.684	Molas	Atokan	Mid-Lower Pen	this study	1
	MP-DZ1	37.7423	-107.687	Molas	Atokan		Nair et al. 2018	1
Central/Southern Arizona Basins
	Prv	31.6983	-110.499	Rain Valley	Guadalupian		this study	4
	pk0125151	33.9123	-115.062	Kaibab	Guadalupian		this study	4
	1WM-478	31.7711	-110.392	Middle Earp	Wolfcampian		this study	3
	1WM-520	31.7712	-110.392	Upper Earp	Wolfcampian		this study	3
	Pedreg	31.5	-110	Horquilla	Desmoinesian		Soreghan et al., 2002	2
	1WM-302	31.7723	110.385	Horquilla	Virgilian		this study	2
	1PL-534	33.1919	-110.662	Horquilla	Virgilian		this study	2
Keeler-Lone Pine Basin
	10-12-15-3	36.4852	-117.736	Ps11, near "CM Area 4"	Guadalupian or Cisuralian		this study	4
	6-20-17-3	36.5159	-117.733	Ps12a "CM Area 1"	Guadalupian or Cisuralian		this study	4
	6-20-17-4	36.5161	-117.733	Ps12a "CM Area 1"	Guadalupian or Cisuralian		this study	4
	12-02-16-1	36.7858	-118.066	Pla/b Coyote Springs Hill	Late Wolfcampian		this study	3
	12-03-16-1	36.7258	-118.039	Plc, Canyon N of Lucky Slim Mine	Wolfcampian/Leonardian		this study	3
	12-03-16-3	36.7225	-118.036	Plc, Lucky Slim Mine	Wolfcampian/Leonardian		this study	3
	10-11-15-1	36.8097	-118.11	Plc "Dead Duck Hill" @ Mazurka Canyon	Wolfcampian/Leonardian		this study	3
	12-03-16-2	36.7253	-118.04	Pld, Canyon N of Lucky Slim Mine	Wolfcampian/Leonardian		this study	3
	09-C19-676	36.494	-117.687	Owens Valley Group, sedimentary rocks of Santa Rosa Flat, unit 2	Permian		Attia et al., 2018	3
	KC-2	36.5229	117.81	Keeler Canyon, lower Salt Tram member	Virgilian		this study	2
	09-CM-699	36.5154	-117.702	Mexican Spring Formation	Mississippian		Attia et al., 2018	0
Marathon Basin
	Z1	30.2102	-103.187	Haymond Fm	Pennsylvanian	Middle	Gleason et al., 2007	2
	Z4	30.4827	-102.852	Haymond Fm	Pennsylvanian	Middle	Gleason et al., 2007	2
Anadarko Basin
	OK-10-PO1	34.7244	-98.4698	Post Oak Conglomerate	Permian	Lower	Thomas et al., 2016	3
	OK-4-WL	34.3905	-97.4134	Wellington Fm	Permian		Thomas et al., 2016	3
	OK-1-VN	34.4807	-97.0376	Vanoss Conglomerate	Pennsylvanian	Upper	Thomas et al., 2016	2
	OK-2-V2	34.4915	-97.035	Vanoss Conglomerate	Pennsylvanian	Upper	Thomas et al., 2016	2
Wood River Basin
	03PL12	43.4325	-114.115	Wilson Creek Member, Wood River Fm.	Permian	Lower	Link et al., 2015	3
	01PL12	43.4671	-114.2	Hailey Mmb; Wood River Fm	Pennsylvanian	Middle	Link et al., 2015	2
	04TD10	43.7357	-114.194	Eagle Creek Mbr., Wood River Fm.	Virgilian to Wolfcampian		Link et al., 2015	2
	14TD10	43.7027	-114.194	Eagle Creek Mbr., Wood River Fm.	Virgilian to Wolfcampian		Link et al., 2015	2
	ECS-13-2	42.7414	-108.821	Tensleep Ss., Sinks Cyn., WY	Pennsylvanian	Upper	Link et al., 2015	2
	ECS-13-4	40.9318	-109.775	Weber Ss., Sheep Ck., UT	Pennsylvanian	Upper	Link et al., 2015	2
	ECS-13-5	40.8308	-108.735	Weber Ss., Irish Cyn., CO	Pennsylvanian	Upper	Link et al., 2015	2
	24PL09	44.3206	-114.55	Salmon_River_Assemblage	Mississippian	Lower	Beranek et al., 2016	0
	10JM94	43.6192	-113.867	Argosy_Creek_Fm	Mississippian	lower	Beranek et al., 2016	0
	40JM94	43.6192	-113.867	Argosy_Creek_Fm	Mississippian	Lower	Beranek et al., 2016	0
	05PL15	43.8632	-114.261	Argosy_Creek_Fm	Mississippian	lower	Beranek et al., 2016	0
	09LB04	43.8621	-114.308	Little_Cooper_Fm	Mississippian	Lower	Beranek et al., 2016	0
Oquirrh Basin
	UT1	40.0522	-111.552	Diamond Creek Sandstone	Permian		Lawton et al., 2010	3
	UT62	40.054	-111.558	Oquirrh Sandstone	Pennsylvanian	Middle	Lawton et al., 2010	2
Appalachian Basin
	Washington	40.9822	-81.7742	Washington Fm	Permian	Early	Becker et al., 2006	3
	Greene	41.8548	-80.0992	Greeme Fm	Permian	Early	Becker et al., 2006	3
	WV-1-PR	39.6953	-80.776	Proctor	Permian	lower	Thomas et al., 2017	3
	Cross_Mtn	36.5501	-83.8422	Cross_Mtn_Fm	Pennsylvanian	middle	Thomas et al., 2004	2
	KY-19-PR7	38.3484	-82.6094	Princess No 7 coal	Pennsylvanian	middle	Thomas et al., 2017	2
	Tumbling Run	40.8477	-76.0547	Tumbling Run Mbr, Pottsville Fm	Morrowan		Becker et al., 2005	1
	Pottsville Fm	40.1145	-78.2182	Pottsville Fm	Morrowan		Becker et al., 2005	1
	Pocohontas	37.2938	-81.2046	Pocohontas Fm	Morrowan		Becker et al., 2005	1
	Lee	36.9162	-82.6648	Lee Fm	Morrowan		Becker et al., 2005	1
	Racoon	34.3451	-85.2968	Racoon Mt Fm	Morrowan		Becker et al., 2005	1
	Montevallo	33.0911	-86.9726	Montevallo Coal Zone, Pottsville Fm	Morrowan		Becker et al., 2005	1
	Sewanee	35.7161	-84.9243	Sewanee_Congl.	Pennsylvanian	lower	Thomas et al., 2004	1
	KY-18-CB	38.2904	-83.0877	Corbin	Pennsylvanian	Lower	Thomas et al., 2017	1
	VA-1-GN	37.1235	-82.6112	Grundy Norton	Pennsylvanian	Lower	Thomas et al., 2017	1
	OH-4-SN	41.6663	-81.0395	Sharon	Pennsylvanian	lower	Thomas et al., 2017	1
	OH-1-SS	39.012	-82.7394	Sharon	Pennsylvanian	lower	Thomas et al., 2017	1
	Princeton	37.3961	-81.1315	Princeton Fm	Chesterian	Late	Park et al., 2010	0
	Bluestone	37.7699	-81.0905	Bluestone Fm	Chesterian	Late	Park et al., 2010	0
	Hinton	37.7788	-80.8925	Hinton_fm	Mississipian		Park et al., 2010	0
	Mauch_Chunk	40.0402	-78.1393	Mauch_Chunk_Fm	Mississipian		Park et al., 2010	0
	KY-21-SG	37.1572	-82.6376	Stoney Gap	Mississipian	upper	Thomas et al., 2017	0
Sonora Margin
	Santa_Terresa	28.9883	-110.807	Sierra Santa Terresa	Permian	lower	Gehrels and Pecha, 2014	3
	Mima_Mexico	28.9219	-109.945	Mima Mexico	Permian	lower	Gehrels and Pecha, 2014	3
Nevada Basins
	Battle	39.7517	-115.85	Battle_Formation	Pennsylvanian	middle	Gehrels et al., 2000	2
	Tonka	40.725	-116.021	Tonka_Fm	Mississippian		Gehrels et al., 2000	0
Bighorn Basin
	HB-01-10	44.959	-108.252	Goose_Egg_Fm	P-T		May et al., 2013	4
	HB-02-10	44.959	-108.252	Goose_Egg_Fm	P-T		May et al., 2013	4
	07-CM-001	44.504	-109.136	Tensleep_Formation	Lower Penn-Wolfcamp		May et al., 2013	2
	07-BC-001	45.021	-108.251	Tensleep_Formation	Lower Penn-Wolfcamp		May et al., 2013	2
	07-BHU-001	44.871	-108.069	Tensleep_Formation	Lower Penn-Wolfcamp		May et al., 2013	2
	BCRA-01-10	45.042	-108.252	Amsden_Formation	Pennsyvlanian	Lower	May et al., 2013	1
Southwest Montana
	PHOS	45.4552	-112.573	Phosphoria Formation	Guadalupian		this sudy	4
	quad1	45.4387	-112.565	Quadrant Formation	Upper Pennsylvanian		this sudy	2
Canada
	Spray_Lakes	50.8078	-115.274	Spray_Lakes_Gp	Pennsyvanian		Gehrels et al., 1998	2
	Kindle	58.8147	-125.022	Kindle FM	Wolfcampian		Gehrels and Pecha, 2014	3
Arkoma Basin
	MB1-3	36.0334	-93.6724	Middle Boyd Sandstone	Morrowan		Buratowski, 2014	1
	MB2-4	35.9411	-93.2558	Middle Boyd Sandstone	Morrowan		Buratowski, 2014	1
	MB2-2	35.8754	-93.0457	Middle Boyd Sandstone	Morrowan		Buratowski, 2014	1
	MB2-3	35.724	-93.0249	Middle Boyd Sandstone	Morrowan		Buratowski, 2014	1
	MB2-5	36.0547	-93.3588	Middle Boyd Sandstone	Morrowan		Buratowski, 2014	1
	MB2-1	36.1778	-93.2071	Middle Boyd Sandstone	Morrowan		Buratowski, 2014	1
	MB1-2	35.997	-93.4211	Middle Boyd Sandstone	Morrowan		Buratowski, 2014	1
	MB1-1	35.9283	-93.3899	Middle Boyd Sandstone	Morrowan		Buratowski, 2014	1
	16	34.8591	-95.3549	Atoka Fm	Atokan		Sharrah, 2006	1
	23	34.7583	-95.4468	Spiro Mbr, Atoka Fm	Atokan		Sharrah, 2006	1
	29	34.6265	-95.9258	Atoka Fm	Atokan		Sharrah, 2006	1
	38	34.8897	-95.3158	Spiro Mbr, Atoka Fm	Atokan		Sharrah, 2006	1
	48	34.7569	-95.4373	Atoka Fm	Atokan		Sharrah, 2006	1
	49	34.8842	-95.3183	Atoka Fm	Atokan		Sharrah, 2006	1
	50	34.7607	-95.4355	Atoka Fm	Atokan		Sharrah, 2006	1
	46-1	35.0049	-92.0705	Atoka Fm	Atokan		Sharrah, 2006	1
	46-2	35.0048	-92.0707	Atoka Fm	Atokan		Sharrah, 2006	1
	Stanley	34.3231	-93.8448	Stanley Gp	Mississippian		McGuire, 2017	0
	Hot_spring	34.5686	-93.0189	Hotspring Member, Stanley Gp	Mississippian		McGuire, 2017	0
Illinois Basin
	IB_D1	41.4346	-90.942	Upper Tradewater Fm	Desmoinesian		Kissock et al., 2017	2
	IB_D3	41.1939	-88.903	Carbondale Fm	Desmoinesian		Kissock et al., 2017	2
	IB_D2	41.4686	-90.0808	Upper Tradewater Fm	Desmoinesian		Kissock et al., 2017	2
	IB_D4	40.6375	-89.6542	Shelburn Fm	Desmoinesian		Kissock et al., 2017	2
	IB_AD	40.4914	-90.3677	Upper Tradewater Fm	Desmoinesian		Kissock et al., 2017	1
	IB_M1	41.4342	-90.9403	Caseyville Fm	Morrowan		Kissock et al., 2017	1
	IB_M2	41.4638	-90.5708	Caseyville Fm	Morrowan		Kissock et al., 2017	1
Forest City Basin
	FCB_D1	41.3668	-92.9891	Floris Fm	Desmoinesian		Kissock et al., 2017	2
	FCB_D2	41.3893	-93.0341	Floris Fm	Desmoinesian		Kissock et al., 2017	2
	FCB_D3	42.3929	-94.0808	Floris Fm	Desmoinesian		Kissock et al., 2017	2
	FCB_D4	41.9828	-93.8933	Vertegris	Desmoinesian		Kissock et al., 2017	2
	FCB_AD	40.613	-92.627	Kalo Fm	Desmoinesian		Kissock et al., 2017	1
	FCB_A2	40.613	-92.627	Kilbourn Fm	Atokan		Kissock et al., 2017	1
	FCB_A1	41.6772	-91.5315	Kilbourn Fm	Atokan		Kissock et al., 2017	1
Fort Worth Basin
	S4	32.705	-98.0688	Grindstone Creek Fm. (Dobbs Valley)	Desmoinesian		Alsalem et al., 2017	2
	S5	32.7554	-98.0562	Mineral Wells Fm (Brazos River)	Desmoinesian	upper	Alsalem et al., 2017	2
	S6	32.7828	-98.1802	Mineral Wells Fm (Lake Pinto)	Desmoinesian-Missourian		Alsalem et al., 2017	2
	S7	32.7679	-98.3125	Turkey Creek	Missorian		Alsalem et al., 2017	2
	S8	32.7529	-98.5197	Colony Creek Shale	Missorian		Alsalem et al., 2017	2
	S3	31.1377	-98.5795	Big Saline Fm	Atokan		Alsalem et al., 2017	1
Delaware Basin
	JCT-4946	31.3046	-103.146	Bell Canyon Fm	Guadalupian		Xie et al., 2018	4
	CC-I	31.3046	-103.146	Cherry Canyon Fm	Guadalupian		Xie et al., 2018	4
	CC-II	31.3046	-103.146	Cherry Canyon Fm	Guadalupian		Xie et al., 2018	4
	CC-III	31.3046	-103.146	Cherry Canyon Fm	Guadalupian		Xie et al., 2018	4
	BrushCn	32.0212	-104.047	Brushy Canyon Fm	Guadalupian		Xie et al., 2018	4
	Rader	31.9316	-104.731	Bell Canyon Fm	Guadalupian		Soreghan et al., 2013	4
	Yates	32.2826	-104.364	Bell Canyon Fm	Guadalupian		Soreghan et al., 2013	4
	Brushy	31.8483	-104.84	Brushy Canyon Fm	Guadalupian		Soreghan et al., 2013	4
Source Terranes
Ouachita Marathon Source
	Blaylock				Silurian		McGuire, 2017
	Polk_Creek				Ordovician	upper	McGuire, 2017
	Womble				Ordovician	middle	McGuire, 2017
	Blakley				Ordovician	middle	McGuire, 2017
	Crystal Mountain				Ordovician	lower	McGuire, 2017
Central Appalachian crystsalline
	CHDAM1	35.548	84.05	Walden Creek Group (Ocoee Supergroup)	Precambrian		Bream et al., 2004
	LQZT	35.702	83.04	Longarm Quartzite, Snowbird Group (Ocoee Supergroup)	Precambrian		Bream et al., 2004
	SERV2	35.248	84.444	Sandsuck Formati up (Ocoee Supergroup)	Precambrian		Bream et al., 2004
	TELPL2	35.336	84.296	Dean Formation, Great Smoky Group (Ocoee Supergroup)	Precambrian		Bream et al., 2004
	COLRAB	34.908	83.612	Coleman River Formation	Precambrian	late	Bream et al., 2004
	OTCOW	35.06	83.453	Otto Formation			Bream et al., 2004
	OTD	34.56	84.074	Otto Formation			Bream et al., 2004
	QMS1	34.533	84.018	Otto Formation			Bream et al., 2004
	BECR	35.454	82.661	Tallulah Falls Formation–Ashe Formation (metagraywacke member)	Neoproterozoic		Bream et al., 2004
	BOCAT	35.6	82.538	Tallulah Falls Formation–Ashe Formation (metagraywacke member)	Neoproterozoic		Bream et al., 2004
	TFQZT1	34.817	83.424	Tallulah Falls Formation (quartzite member)	Neoproterozoic		Bream et al., 2004
	TFQZT2	34.736	83.391	Tallulah Falls Formation (quartzite member)	Neoproterozoic		Bream et al., 2004
	TFTIG441	34.838	83.422	Tallulah Falls Formation–Ashe Formation (metagraywacke member)	Neoproterozoic		Bream et al., 2004
	SMHC	36.271	80.602	Hogan Creek Formation	Precambrian		Bream et al., 2004
	PMQZT	36.344	80.482	Pilot Mountain Quartzite	Precambrian		Bream et al., 2004
	BPM1	34.916	82.914	Chauga River Formation (Brevard–Poor Mountain Transitional member)	Neoproterozoic		Bream et al., 2004
	KEOTF	34.696	82.879	Tallulah Falls Formation–Ashe Formation (aluminous schist member)	Neoproterozoic		Bream et al., 2004
	SMTF	36.275	80.732	Tallulah Falls Formation–Ashe Formation (metagraywacke member)	Neoproterozoic		Bream et al., 2004
	UTF85	35.644	81.987	Tallulah Falls Formation–Ashe Formation (metagraywacke member)	Neoproterozoic		Bream et al., 2004
	BCTF	35.539	81.702	Metagraywacke biotite-gneiss not presently assigned to a formation			Bream et al., 2004
	GR1	34.917	82.139	Metagraywacke biotite-gneiss not presently assigned to a formation			Bream et al., 2004
Central Appalachian Sed-Cover
	Hampsire_FM				Devonian		Park et al., 2010
	Chemung Formation				Devonian		Park et al., 2010
	Foreknobs Formation				Devonian		Park et al., 2010
	Oriskany Formation				Devonian		Park et al., 2010
	Keefer Formation				Silurian		Park et al., 2010
	Rose Hill Formation				Silurian		Park et al., 2010
	Tuscarora Sandstone				Silurian		Park et al., 2010
	Oswego Formation				Ordovician		Park et al., 2010
	Fincastle Member, Martinsburg				Ordovician		Park et al., 2010
	D1			Chemung	Devonian		Erikson et al., 2004
	S1			Eagle Rock	Silurian		Erikson et al., 2004
	O1, O2, O3			Bays Fm	Ordovician	mid-late	Erikson et al., 2004
	N1			Uncoi	Neoproterozoic		Erikson et al., 2004
	C1			Erwin	Cambrian		Erikson et al., 2004
	C2			Hardystrom SS	Cambrian		Erikson et al., 2004
	AL-1-CM			Colvin Mountain SS	Upper Ordovician	lower	Thomas et al., 2017
	AL-2-FM			Frog Mountain SS	Devonian		Thomas et al., 2017
Northern Appalachians
	all data from Cawood and Nemchin 2001
	All data from Bradley et al., 2017
NW Ellesmerian
	WGZ-029-06				Devonian to lowest Mississippian		Beranek et al., 2010
	87LHA39-4A				Devonian to lowest Mississippian		Beranek et al., 2010
	2006LHA1-4B				Devonian to lowest Mississippian		Beranek et al., 2010
	2003LHA9-1A				Devonian to lowest Mississippian		Beranek et al., 2010
	06-TNT-RR-020P-T1				Devonian to lowest Mississippian		Beranek et al., 2010
	06-TNT-RR-020P-T2				Devonian to lowest Mississippian		Beranek et al., 2010
	06-TNT-RR-029B				Devonian to lowest Mississippian		Beranek et al., 2010
	06-TNT-TR-027B				Devonian to lowest Mississippian		Beranek et al., 2010
	2006LHA4-7				Devonian to lowest Mississippian		Beranek et al., 2010
	13LB07				Devonian to lowest Mississippian		Beranek et al., 2010
	MLB-89-346-B				Devonian to lowest Mississippian		Beranek et al., 2010
	27LB05				Devonian to lowest Mississippian		Beranek et al., 2010
	TS2 - 28LB05				Devonian to lowest Mississippian		Beranek et al., 2010
NE Ellesmerian
	AE1				Devonian		Anfinson et al., 2011
	AF				Cambrian		Anfinson et al., 2011
	BF				Devonian		Anfinson et al., 2011
	BI-1				Devonian		Anfinson et al., 2011
	BI-2				Devonian		Anfinson et al., 2011
	BI-3				Devonian		Anfinson et al., 2011
	BL-1				Devonian		Anfinson et al., 2011
	BL-2				Devonian		Anfinson et al., 2011
	DR				Devonian		Anfinson et al., 2011
	FR-1				Devonian		Anfinson et al., 2011
	FR-2				Devonian		Anfinson et al., 2011
	FR-3				Devonian		Anfinson et al., 2011
	HB-1				Devonian		Anfinson et al., 2011
	HB-2				Devonian		Anfinson et al., 2011
	HB-3				Devonian		Anfinson et al., 2011
	HB-4				Devonian		Anfinson et al., 2011
	KC				Ediacaran		Anfinson et al., 2011
	PI-1				Devonian		Anfinson et al., 2011
	PI-2				Devonian		Anfinson et al., 2011
	PI-3				Devonian		Anfinson et al., 2011
	PI-4				Devonian		Anfinson et al., 2011
	PI-5				Devonian		Anfinson et al., 2011
	PI-6				Devonian		Anfinson et al., 2011
	PI-7				Devonian		Anfinson et al., 2011
	PI-8				Devonian		Anfinson et al., 2011
	SF-1				Devonian		Anfinson et al., 2011
	SF-2						Anfinson et al., 2011
Sonoran Source
	Preevodera				Lower Cambrian		Gehrels and Pecha, 2014
	Lopez				Middle-upper Ordovician		Gehrels and Pecha, 2014
	Aliso				Middle Ordivician		Gehrels and Pecha, 2014
	Cerro Pollo				Upper Devonian		Gehrels and Pecha, 2014
	Los Pozos				Upper Devonian		Gehrels and Pecha, 2014

## Sheet: Arizona Shelf Data (this study)
2QZ-272							Isotope ratios						Apparent ages (Ma)
Analysis	U	206Pb	U/Th	206Pb*	±	207Pb*	±	206Pb*	±	error	206Pb*	±	207Pb*	±	206Pb*	±	Best age	±	Conc
	(ppm)	204Pb		207Pb*	(%)	235U*	(%)	238U	(%)	corr.	238U*	(Ma)	235U	(Ma)	207Pb*	(Ma)	(Ma)	(Ma)	(%)
2QZ-272-Spot 286	1870.17	516.019	1.1054	7.38891	2.87795	0.886885	3.75652	0.0475483	2.4143	0.642696	299.452	7.06433	644.694	17.9301	2168.36	50.1719	299.452	7.06433	NA
2QZ-272-Spot 5	392.67	6484.62	2.19771	19.1324	1.12936	0.350027	2.93505	0.0485912	2.70907	0.923007	305.867	8.09265	304.741	7.72703	297.131	25.7923	305.867	8.09265	NA
2QZ-272-Spot 271	264.058	20478.3	0.459554	18.5747	1.31343	0.365741	3.08302	0.0492929	2.78925	0.904714	310.179	8.44683	316.492	8.38343	364.196	29.6046	310.179	8.44683	NA
2QZ-272-Spot 217	474.234	641319	1.88734	18.0698	1.20955	0.395418	2.85929	0.0518438	2.59085	0.906118	325.832	8.23203	338.32	8.22715	426.006	26.9797	325.832	8.23203	NA
2QZ-272-Spot 26	177.192	141963	1.78683	18.1745	1.59228	0.4057	3.16258	0.0535003	2.7325	0.86401	335.975	8.94542	345.774	9.26822	413.099	35.597	335.975	8.94542	NA
2QZ-272-Spot 148	578.134	17496.2	2.57517	18.9287	1.24435	0.396168	2.81456	0.0544111	2.52455	0.89696	341.547	8.39809	338.865	8.10946	321.519	28.2796	341.547	8.39809	NA
2QZ-272-Spot 172	211.544	190227	2.2036	17.815	1.42093	0.436274	3.10149	0.056394	2.75685	0.888878	353.658	9.48721	367.622	9.56612	457.635	31.5225	353.658	9.48721	NA
2QZ-272-Spot 39	1257.54	864.535	3.35999	9.50751	2.48188	0.817545	3.85606	0.0563983	2.95118	0.765337	353.685	10.1567	606.678	17.6134	1717.45	45.6271	353.685	10.1567	NA
2QZ-272-Spot 279	2606.59	906.89	5.20422	9.69407	3.12796	0.81807	4.16318	0.0575419	2.74734	0.659915	360.659	9.63648	606.971	19.0233	1681.65	57.7718	360.659	9.63648	NA
2QZ-272-Spot 208	532.803	709.868	2.98721	8.0883	12.9441	1.08398	14.3087	0.0636162	6.09831	0.426196	397.58	23.5132	745.577	75.7115	2009.32	230.711	397.58	23.5132	NA
2QZ-272-Spot 10	635.565	55308.1	118.85	17.8242	1.04319	0.49248	3.46707	0.0636922	3.3064	0.95366	398.041	12.7628	406.599	11.6169	456.481	23.1455	398.041	12.7628	NA
2QZ-272-Spot 205	379.091	34885.6	1.42778	17.9647	0.942079	0.495783	2.57126	0.0646247	2.39246	0.930462	403.69	9.36191	408.844	8.65384	439.003	20.9718	403.69	9.36191	91.9561
2QZ-272-Spot 170	96.6384	8610.51	2.73442	17.7921	1.97091	0.513223	3.41186	0.0662554	2.78502	0.816275	413.556	11.1559	420.614	11.7502	460.443	43.7229	413.556	11.1559	89.817
2QZ-272-Spot 311	261.414	17903.5	1.38835	18.0423	1.57476	0.507464	3.36237	0.0664333	2.97081	0.883545	414.632	11.9301	416.742	11.4935	429.392	35.1165	414.632	11.9301	96.5625
2QZ-272-Spot 40	172.57	13849.4	1.06125	17.433	1.24234	0.535403	2.90075	0.0677239	2.62125	0.903646	422.428	10.7179	435.389	10.271	505.511	27.3539	422.428	10.7179	83.5646
2QZ-272-Spot 182	391.974	28461.1	2.00413	17.8839	0.979081	0.526086	2.65854	0.0682662	2.47168	0.929716	425.702	10.1821	429.209	9.30599	449.028	21.7724	425.702	10.1821	94.8052
2QZ-272-Spot 79	542.078	42473.6	2.5703	18.0394	1.04658	0.527123	3.55555	0.0689957	3.39803	0.955697	430.102	14.1381	429.898	12.4622	429.756	23.3284	430.102	14.1381	100.081
2QZ-272-Spot 268	763.935	39747.5	2.11461	18.0766	1.13738	0.526322	2.55669	0.0690328	2.28977	0.895598	430.326	9.53179	429.366	8.95209	425.163	25.3728	430.326	9.53179	101.214
2QZ-272-Spot 74	198.322	26885.8	1.01375	17.8862	1.38744	0.533358	3.13271	0.069219	2.80872	0.896576	431.449	11.7216	434.036	11.0648	448.732	30.8254	431.449	11.7216	96.1486
2QZ-272-Spot 233	342.062	49432.9	1.15605	17.7647	1.30832	0.537926	3.64572	0.0693377	3.40288	0.933389	432.164	14.2239	437.056	12.9486	463.899	28.9931	432.164	14.2239	93.1591
2QZ-272-Spot 164	440.3	13148.1	1.45961	17.8354	1.25601	0.538813	2.90484	0.0697283	2.61926	0.901689	434.519	11.0061	437.641	10.3281	455.068	27.8959	434.519	11.0061	95.4844
2QZ-272-Spot 66	373.062	21740.3	1.52298	17.7184	0.851753	0.545474	2.70037	0.0701271	2.56252	0.948952	436.921	10.8252	442.027	9.67785	469.665	18.8658	436.921	10.8252	93.0283
2QZ-272-Spot 75	179.151	14586.1	1.13895	17.6009	1.20761	0.55077	3.22578	0.0703387	2.9912	0.927282	438.196	12.6718	445.501	11.6334	484.387	26.6542	438.196	12.6718	90.464
2QZ-272-Spot 112	170.406	12434.8	1.35003	17.8099	1.55927	0.546092	2.9276	0.0705692	2.47781	0.84636	439.584	10.529	442.433	10.5	458.23	34.5861	439.584	10.529	95.9308
2QZ-272-Spot 212	320.369	344894	16.0257	17.6403	1.00477	0.557525	2.92876	0.0713606	2.75101	0.93931	444.348	11.8123	449.914	10.6453	479.407	22.2077	444.348	11.8123	92.6869
2QZ-272-Spot 60	379.102	528936	1.85534	17.6574	1.6846	0.559235	2.96181	0.0716488	2.43607	0.822494	446.081	10.4994	451.028	10.7866	477.268	37.2446	446.081	10.4994	93.4657
2QZ-272-Spot 253	149.636	6250.07	1.80467	17.2089	2.0541	0.575219	3.61825	0.0718247	2.97866	0.823232	447.139	12.8674	461.384	13.4167	533.894	44.9785	447.139	12.8674	83.7505
2QZ-272-Spot 99	80.0703	6045.17	1.57952	17.4654	1.97479	0.572661	3.47951	0.0725713	2.86482	0.82334	451.628	12.4955	459.734	12.8657	501.383	43.4873	451.628	12.4955	90.0765
2QZ-272-Spot 2	774.845	36547.5	113.188	17.5245	1.01068	0.577076	2.66021	0.0733781	2.46074	0.925017	456.476	10.8442	462.58	9.88418	493.957	22.2759	456.476	10.8442	92.4121
2QZ-272-Spot 100	343.693	49747.5	10.7044	17.219	1.3575	0.620955	2.9444	0.0775813	2.61279	0.887376	481.669	12.1263	490.446	11.4534	532.624	29.7219	481.669	12.1263	90.4333
2QZ-272-Spot 129	568.171	243876	4.51574	17.0754	1.03923	0.649512	2.45028	0.0804724	2.21898	0.905603	498.942	10.6538	508.179	9.79695	550.931	22.675	498.942	10.6538	90.5633
2QZ-272-Spot 58	209.482	412534	0.449899	16.5571	1.15924	0.705272	3.34105	0.0847286	3.13349	0.937876	524.285	15.7781	541.935	14.0315	617.803	25.0459	524.285	15.7781	84.8629
2QZ-272-Spot 52	205.158	29469.2	5.94056	16.4394	1.08363	0.731408	3.02601	0.0872436	2.82533	0.933681	539.215	14.6149	557.379	12.9803	633.228	23.3341	539.215	14.6149	85.1533
2QZ-272-Spot 215	318.982	22571.4	2.62405	17.3023	1.15623	0.698928	2.79932	0.0877453	2.54938	0.910712	542.188	13.2571	538.15	11.6939	522.008	25.3609	542.188	13.2571	103.866
2QZ-272-Spot 96	259.413	34500.9	1.83361	16.7438	1.19695	0.72822	3.30265	0.0884717	3.07811	0.932014	546.492	16.1284	555.508	14.1314	593.595	25.9231	546.492	16.1284	92.0647
2QZ-272-Spot 104	59.8252	26365.3	0.762381	16.3669	1.41542	0.747449	3.30371	0.0887638	2.98514	0.903574	548.222	15.6887	566.743	14.3495	642.739	30.4415	548.222	15.6887	85.2946
2QZ-272-Spot 283	132.515	32893.1	3.51315	16.913	1.26237	0.726986	3.02965	0.0892142	2.75413	0.909058	550.888	14.542	554.783	12.9504	571.733	27.4617	550.888	14.542	96.3541
2QZ-272-Spot 175	26.9612	4110.62	2.98739	16.4012	1.9515	0.751725	3.12802	0.0894587	2.44462	0.781522	552.335	12.9402	569.225	13.6307	638.237	41.979	552.335	12.9402	86.5407
2QZ-272-Spot 289	278.373	25435.3	2.04293	17.0441	1.0976	0.73346	2.71233	0.0907062	2.48032	0.914463	559.712	13.2971	558.582	11.6534	554.907	23.9329	559.712	13.2971	100.866
2QZ-272-Spot 169	203.28	19126.9	1.40744	15.9845	1.51144	0.791037	3.54803	0.0917449	3.20999	0.904726	565.849	17.3894	591.76	15.9127	693.314	32.2107	565.849	17.3894	81.6151
2QZ-272-Spot 154	119.61	13876.7	3.17459	15.9106	1.40273	0.800407	3.62523	0.0924029	3.34284	0.922106	569.733	18.228	597.058	16.366	703.216	29.8646	569.733	18.228	81.0182
2QZ-272-Spot 128	48.3784	105333	0.490924	16.125	2.59334	0.791853	4.22443	0.0926473	3.33473	0.789391	571.175	18.2277	592.223	18.9579	674.622	55.4841	571.175	18.2277	84.6658
2QZ-272-Spot 11	246.461	32802	3.05892	16.7569	1.2605	0.770673	3.19668	0.0937028	2.93767	0.918975	577.399	16.2246	580.149	14.1282	591.872	27.3296	577.399	16.2246	97.5547
2QZ-272-Spot 124	125.178	5019.7	0.861015	17.0402	1.24142	0.762156	3.51342	0.0942338	3.28679	0.935496	580.528	18.2468	575.253	15.4309	555.396	27.0764	580.528	18.2468	104.525
2QZ-272-Spot 6	154.352	102903	2.3967	16.3568	1.3069	0.796179	3.29721	0.0944921	3.02715	0.918093	582.05	16.8475	594.671	14.8412	644.072	28.1104	582.05	16.8475	90.3703
2QZ-272-Spot 273	119.824	36945.3	3.33528	15.8087	1.60803	0.840624	3.4935	0.096424	3.10141	0.887768	593.418	17.5827	619.49	16.2018	716.843	34.1513	593.418	17.5827	82.7821
2QZ-272-Spot 259	737.975	165307	1.26827	16.7022	1.08148	0.796336	3.34481	0.0965068	3.16514	0.946286	593.905	17.9581	594.76	15.0571	598.962	23.4124	593.905	17.9581	99.1558
2QZ-272-Spot 3	521.046	30825	3.49772	16.8042	0.781685	0.794663	2.42066	0.096892	2.29098	0.946425	596.169	13.0456	593.814	10.8838	585.791	16.9438	596.169	13.0456	101.772
2QZ-272-Spot 109	369.164	97580.8	3.31704	16.7113	1.11767	0.804326	3.08579	0.0975283	2.87626	0.932101	599.907	16.4764	599.266	13.9682	597.771	24.1973	599.907	16.4764	100.357
2QZ-272-Spot 270	83.9522	14777.7	0.767995	16.2564	1.61925	0.83792	3.22423	0.0988359	2.78814	0.864744	607.583	16.1665	617.997	14.9267	657.243	34.7457	607.583	16.1665	92.4442
2QZ-272-Spot 276	171.414	6370.14	0.661073	15.8826	1.48508	0.86046	3.00653	0.0991608	2.61415	0.869489	609.489	15.2029	630.374	14.12	706.95	31.5818	609.489	15.2029	86.2139
2QZ-272-Spot 131	425.365	17299.7	0.941936	16.444	0.842353	0.837468	2.84517	0.0999225	2.71761	0.955168	613.955	15.9151	617.747	13.1677	632.627	18.1485	613.955	15.9151	97.0485
2QZ-272-Spot 307	1119.89	98761.8	5.90566	16.4041	1.02093	0.856792	2.82705	0.10198	2.63627	0.932516	626.005	15.7272	628.37	13.2465	637.851	21.9854	626.005	15.7272	98.1428
2QZ-272-Spot 7	78.479	8034.9	0.543608	16.4319	1.13523	0.856409	3.02216	0.102107	2.80084	0.926767	626.745	16.7278	628.161	14.1574	634.217	24.4394	626.745	16.7278	98.8219
2QZ-272-Spot 225	141.152	35798.4	1.23163	16.3305	1.21597	0.867908	2.65406	0.10284	2.35912	0.888873	631.029	14.1813	634.43	12.5222	647.523	26.1406	631.029	14.1813	97.4528
2QZ-272-Spot 69	109.042	77503.1	2.60558	16.1941	1.31018	0.875962	3.44518	0.102927	3.18633	0.924866	631.539	19.1687	638.8	16.3358	665.512	28.0603	631.539	19.1687	94.8952
2QZ-272-Spot 24	124.685	22597.3	1.09324	15.8223	1.23375	0.909009	3.32159	0.104358	3.08396	0.928459	639.898	18.7865	656.53	16.061	715.029	26.1953	639.898	18.7865	89.4927
2QZ-272-Spot 303	128.402	10878.2	2.6054	16.2481	1.17554	0.891605	2.79839	0.105114	2.5395	0.907488	644.312	15.5712	647.231	13.3938	658.362	25.2057	644.312	15.5712	97.8659
2QZ-272-Spot 201	309.479	62477.2	1.5764	16.0147	1.13413	0.963714	3.13872	0.111984	2.92665	0.932436	684.258	18.9997	685.218	15.6418	689.309	24.1767	684.258	18.9997	99.2672
2QZ-272-Spot 32	63.354	19322.8	2.86522	15.2822	1.28589	1.0578	2.95015	0.117294	2.65516	0.900008	714.968	17.9688	732.736	15.3995	788.358	27.0135	714.968	17.9688	90.6908
2QZ-272-Spot 188	481.241	35848.8	7.2023	14.4488	1.20074	1.22354	4.05521	0.128274	3.87336	0.955157	778.009	28.3878	811.394	22.6615	904.988	24.7564	778.009	28.3878	85.969
2QZ-272-Spot 187	767.783	74216.1	13.3173	14.2743	0.884475	1.37189	2.53259	0.14209	2.37312	0.937034	856.47	19.0328	876.975	14.8748	929.997	18.1773	856.47	19.0328	92.0939
2QZ-272-Spot 87	510.056	653701	2.43887	14.5312	1.29233	1.47205	2.73658	0.155208	2.41221	0.881469	930.089	20.8924	918.972	16.5479	893.293	26.6818	893.293	26.6818	104.119
2QZ-272-Spot 101	202.111	166368	1.37152	14.2269	1.33204	1.49412	3.02734	0.154235	2.71854	0.897995	924.661	23.4177	927.994	18.4165	936.8	27.3364	936.8	27.3364	98.7042
2QZ-272-Spot 181	167.976	16405.3	2.49695	14.1653	1.26603	1.51707	2.52301	0.155926	2.18237	0.864987	934.095	18.9773	937.295	15.4416	945.704	25.9075	945.704	25.9075	98.7725
2QZ-272-Spot 298	278.227	23719.9	2.5998	14.1386	1.08152	1.54598	2.87583	0.158598	2.66471	0.92659	948.98	23.5145	948.891	17.7331	949.565	22.1345	949.565	22.1345	99.9383
2QZ-272-Spot 267	177.602	170887	2.79992	14.0163	0.925998	1.51472	3.36534	0.154047	3.23543	0.961399	923.609	27.8409	936.346	20.5855	967.314	18.8804	967.314	18.8804	95.4818
2QZ-272-Spot 18	259.206	25336.3	7.14635	13.9496	0.912289	1.56635	2.93181	0.15854	2.78626	0.950355	948.656	24.5793	956.981	18.1713	977.033	18.6122	977.033	18.6122	97.0955
2QZ-272-Spot 130	88.779	11439.1	1.31288	13.8995	1.3156	1.69035	3.42001	0.170477	3.15685	0.923052	1014.74	29.6399	1004.9	21.8219	984.376	26.7828	984.376	26.7828	103.084
2QZ-272-Spot 54	412.531	27998.8	4.34811	13.852	1.15971	1.70919	2.99922	0.171788	2.76593	0.922218	1021.95	26.14	1011.98	19.215	991.331	23.5726	991.331	23.5726	103.089
2QZ-272-Spot 220	225.686	25123.5	2.95708	13.8486	1.33194	1.72923	3.20283	0.173759	2.91274	0.909427	1032.79	27.7965	1019.46	20.608	991.849	27.0645	991.849	27.0645	104.127
2QZ-272-Spot 191	150.437	15637.1	3.8078	13.8016	1.13062	1.68643	2.8535	0.168883	2.61996	0.918155	1005.95	24.4022	1003.41	18.1906	998.733	22.9663	998.733	22.9663	100.723
2QZ-272-Spot 165	192.263	48260.5	3.02777	13.7435	1.16653	1.62071	3.02441	0.161619	2.79039	0.922623	965.766	25.0273	978.267	18.9936	1007.3	23.6469	1007.3	23.6469	95.8766
2QZ-272-Spot 144	79.2352	8907.29	2.0365	13.7075	1.13271	1.69433	3.11355	0.168518	2.9002	0.931478	1003.94	26.9624	1006.4	19.8833	1012.62	22.9597	1012.62	22.9597	99.1425
2QZ-272-Spot 214	291.212	76503.9	2.50831	13.6616	1.26929	1.75804	3.41914	0.174268	3.17481	0.92854	1035.59	30.3732	1030.13	22.1331	1019.41	25.7212	1019.41	25.7212	101.587
2QZ-272-Spot 91	36.3509	9301.46	1.06345	13.622	1.46942	1.78573	3.85695	0.1765	3.56607	0.924584	1047.82	34.4877	1040.27	25.1095	1025.29	29.7284	1025.29	29.7284	102.197
2QZ-272-Spot 302	72.8299	7170.3	2.3887	13.5947	1.05047	1.81906	2.81615	0.179434	2.61289	0.927824	1063.88	25.6255	1052.35	18.4534	1029.36	21.2581	1029.36	21.2581	103.354
2QZ-272-Spot 269	136.997	46738.5	2.43108	13.5829	0.977467	1.67953	3.03866	0.165526	2.87715	0.946849	987.415	26.3408	1000.8	19.3416	1031.11	19.7765	1031.11	19.7765	95.7625
2QZ-272-Spot 150	170.881	35040.1	3.48607	13.5793	1.0099	1.75121	3.48325	0.172545	3.33364	0.957048	1026.12	31.6237	1027.61	22.5165	1031.65	20.4311	1031.65	20.4311	99.4643
2QZ-272-Spot 29	31.6323	23531.9	2.5225	13.5609	1.31993	1.74223	2.83278	0.171428	2.50648	0.884811	1019.97	23.6455	1024.29	18.2764	1034.38	26.6856	1034.38	26.6856	98.6068
2QZ-272-Spot 153	23.6509	139952	19.7733	13.5482	1.20679	1.68569	2.67513	0.16571	2.38746	0.892466	988.43	21.8783	1003.14	17.0505	1036.27	24.3934	1036.27	24.3934	95.3833
2QZ-272-Spot 296	121.076	19901.1	1.41702	13.5163	1.00728	1.83767	3.506	0.180224	3.35819	0.95784	1068.2	33.0578	1059.03	23.058	1041.04	20.3491	1041.04	20.3491	102.609
2QZ-272-Spot 173	311.228	67281.5	4.40893	13.4779	0.810158	1.89066	2.30414	0.184895	2.15701	0.936147	1093.66	21.6979	1077.81	15.3034	1046.81	16.3568	1046.81	16.3568	104.476
2QZ-272-Spot 314	1701.26	25904.7	3.94732	13.4766	0.879512	1.47294	2.13484	0.14403	1.94525	0.911193	867.413	15.7874	919.335	12.9119	1047	17.7546	1047	17.7546	82.8477
2QZ-272-Spot 255	52.5235	41490.6	3.19841	13.4565	1.37659	1.82359	2.77707	0.178051	2.41187	0.868495	1056.32	23.4992	1053.98	18.2133	1050.02	27.7641	1050.02	27.7641	100.6
2QZ-272-Spot 207	201.564	32728.3	2.60025	13.4477	1.23008	1.84668	3.68808	0.180188	3.4769	0.94274	1068	34.2207	1062.25	24.2977	1051.34	24.8081	1051.34	24.8081	101.585
2QZ-272-Spot 70	248.305	72086.8	3.72654	13.4368	1.38155	1.79268	3.99664	0.174778	3.75026	0.938353	1038.38	35.9679	1042.8	26.0556	1052.96	27.8436	1052.96	27.8436	98.6152
2QZ-272-Spot 44	13.9832	2550.49	1.8667	13.4366	1.80308	1.80763	3.22473	0.176232	2.67354	0.829072	1046.36	25.8225	1048.22	21.0841	1053	36.3355	1053	36.3355	99.3692
2QZ-272-Spot 285	223.265	244896	2.97229	13.4151	0.991209	1.74533	3.16951	0.169886	3.01053	0.949841	1011.48	28.1824	1025.44	20.4627	1056.23	19.9792	1056.23	19.9792	95.7638
2QZ-272-Spot 125	34.1601	10589.6	2.01085	13.4044	1.41722	1.67421	3.21667	0.162834	2.88764	0.89771	972.505	26.0669	998.784	20.4508	1057.83	28.5317	1057.83	28.5317	91.9341
2QZ-272-Spot 67	71.3277	11636.6	1.30532	13.3439	1.66102	1.88665	3.82723	0.182668	3.448	0.900912	1081.53	34.3312	1076.4	25.404	1066.92	33.4015	1066.92	33.4015	101.369
2QZ-272-Spot 251	122.698	7570.91	2.79709	13.3347	0.98189	1.89898	2.83054	0.183734	2.65477	0.937905	1087.34	26.5634	1080.73	18.8288	1068.32	19.7308	1068.32	19.7308	101.781
2QZ-272-Spot 310	538.974	39414.4	0.972143	13.3189	1.10866	1.80506	3.68006	0.174441	3.50909	0.953542	1036.53	33.5996	1047.29	24.05	1070.69	22.2581	1070.69	22.2581	96.8097
2QZ-272-Spot 176	129.404	20284.3	1.5416	13.3109	0.795185	1.83613	2.26751	0.177336	2.12351	0.936493	1052.41	20.6192	1058.48	14.9069	1071.91	15.9751	1071.91	15.9751	98.1806
2QZ-272-Spot 190	511.818	104853	2.31404	13.2641	1.16062	1.91929	3.61879	0.184717	3.42763	0.947174	1092.69	34.4515	1087.82	24.1623	1078.95	23.2921	1078.95	23.2921	101.274
2QZ-272-Spot 168	63.8043	6574.62	2.49549	13.2639	1.02451	1.9231	2.77369	0.18508	2.57755	0.929284	1094.67	25.9502	1089.15	18.5308	1078.99	20.5602	1078.99	20.5602	101.453
2QZ-272-Spot 309	294.77	38486.8	4.98183	13.2412	1.08229	1.92469	3.22693	0.184916	3.04003	0.942079	1093.78	30.5834	1089.7	21.5658	1082.43	21.7078	1082.43	21.7078	101.048
2QZ-272-Spot 167	105.457	47221.9	1.98859	13.2233	1.05737	1.86463	2.99076	0.178904	2.79761	0.935418	1060.98	27.3684	1068.63	19.7693	1085.15	21.2	1085.15	21.2	97.7727
2QZ-272-Spot 84	133.456	74951.2	12.0593	13.2124	1.09462	2.00718	3.01949	0.192422	2.8141	0.931977	1134.48	29.2742	1117.94	20.4668	1086.81	21.9222	1086.81	21.9222	104.386
2QZ-272-Spot 265	292.482	77850.9	3.35191	13.2001	1.16165	1.94799	2.9745	0.186575	2.73829	0.920588	1102.8	27.7562	1097.76	19.96	1088.64	23.2605	1088.64	23.2605	101.3
2QZ-272-Spot 234	282.343	222085	1.28057	13.1789	0.835315	1.98095	2.93984	0.189427	2.81867	0.958784	1118.27	28.938	1109.04	19.8393	1091.85	16.712	1091.85	16.712	102.42
2QZ-272-Spot 143	55.5327	13331.8	0.727735	13.1378	1.27998	1.87191	2.94253	0.178442	2.64956	0.900434	1058.46	25.8632	1071.21	19.4768	1098.11	25.5961	1098.11	25.5961	96.3893
2QZ-272-Spot 243	193.142	41625.3	1.73125	13.134	0.878436	1.65	3.12821	0.157242	3.00234	0.959763	941.431	26.2981	989.55	19.7796	1098.71	17.584	1098.71	17.584	85.6852
2QZ-272-Spot 262	587.874	16258.6	4.20318	13.1233	1.03494	1.63369	3.02161	0.155561	2.83884	0.939513	932.058	24.6359	983.283	19.0337	1100.33	20.718	1100.33	20.718	84.7073
2QZ-272-Spot 9	137.792	20364.8	2.09643	13.1178	1.22041	1.85082	2.86476	0.176162	2.5918	0.90472	1045.97	25.0246	1063.72	18.887	1101.16	24.4101	1101.16	24.4101	94.9884
2QZ-272-Spot 163	35.388	3024.51	2.17347	13.0769	2.35095	1.91345	3.77459	0.181555	2.95305	0.782352	1075.47	29.2515	1085.79	25.1767	1107.42	46.9663	1107.42	46.9663	97.1146
2QZ-272-Spot 14	67.6753	16014.6	2.26836	13.0493	1.33736	1.76413	3.94758	0.167035	3.71415	0.940866	995.752	34.2692	1032.37	25.5873	1111.62	26.7086	1111.62	26.7086	89.5769
2QZ-272-Spot 93	143.46	25968.2	1.13871	13.0438	1.04428	1.96082	2.98298	0.185579	2.79422	0.936721	1097.38	28.1955	1102.16	20.0615	1112.47	20.8619	1112.47	20.8619	98.6434
2QZ-272-Spot 92	652.514	113233	4.35351	13.0433	1.17796	1.95824	2.65721	0.185329	2.38185	0.89637	1096.02	24.007	1101.28	17.8622	1112.54	23.521	1112.54	23.521	98.5154
2QZ-272-Spot 50	161.919	18038.7	1.63072	13.0198	0.924159	1.91696	3.16698	0.181094	3.02914	0.956476	1072.95	29.9406	1087.01	21.1359	1116.17	18.4275	1116.17	18.4275	96.1276
2QZ-272-Spot 240	88.8952	36290.4	2.42995	13.0171	1.06074	1.88613	2.74206	0.178146	2.52858	0.922147	1056.84	24.6475	1076.22	18.1974	1116.59	21.1674	1116.59	21.1674	94.6487
2QZ-272-Spot 27	28.317	12936.3	0.709627	12.9938	1.44649	1.81843	3.00008	0.171444	2.62833	0.876088	1020.06	24.7971	1052.12	19.6565	1120.16	28.8706	1120.16	28.8706	91.0637
2QZ-272-Spot 73	371.776	39959	3.01267	12.9079	1.20793	2.03847	3.62798	0.190918	3.42099	0.942945	1126.35	35.354	1128.45	24.719	1133.38	24.0477	1133.38	24.0477	99.3789
2QZ-272-Spot 127	160.804	39145.2	3.04693	12.8668	1.25363	2.00028	2.71752	0.186745	2.41108	0.887237	1103.72	24.4582	1115.61	18.3984	1139.69	24.9333	1139.69	24.9333	96.8434
2QZ-272-Spot 236	122.704	1.06852e+06	2.594	12.8505	0.867153	2.0136	2.68124	0.187751	2.53714	0.946257	1109.18	25.8536	1120.1	18.1928	1142.24	17.2368	1142.24	17.2368	97.1057
2QZ-272-Spot 137	237.383	21897.2	2.27667	12.8505	1.12154	2.07023	2.51145	0.193031	2.24711	0.894749	1137.77	23.438	1139.01	17.1966	1142.24	22.2792	1142.24	22.2792	99.6085
2QZ-272-Spot 114	339.784	94110.4	2.37768	12.7907	0.969595	2.14559	2.89819	0.199127	2.73118	0.942377	1170.63	29.2372	1163.63	20.0751	1151.48	19.2671	1151.48	19.2671	101.662
2QZ-272-Spot 189	450.945	47834.5	4.06636	12.698	1.07397	2.15977	2.94295	0.19899	2.73999	0.931035	1169.89	29.3147	1168.2	20.4279	1165.9	21.2955	1165.9	21.2955	100.342
2QZ-272-Spot 47	196.158	22870.6	2.6807	12.6462	1.24569	2.29012	3.70736	0.210139	3.49182	0.94186	1229.56	39.0883	1209.24	26.2082	1174.03	24.6477	1174.03	24.6477	104.73
2QZ-272-Spot 4	342.26	46707	2.96674	12.6295	0.960655	1.95765	2.67417	0.179395	2.49566	0.933247	1063.67	24.4713	1101.08	17.9743	1176.65	19.0023	1176.65	19.0023	90.3979
2QZ-272-Spot 304	260.34	34114.4	2.61791	12.5673	1.12985	2.16302	2.6476	0.197238	2.39441	0.904372	1160.46	25.429	1169.24	18.386	1186.41	22.3364	1186.41	22.3364	97.8127
2QZ-272-Spot 250	85.7869	22442.2	1.61423	12.5651	1.17145	2.06031	2.91299	0.18784	2.66706	0.915575	1109.66	27.1884	1135.72	19.9156	1186.75	23.1507	1186.75	23.1507	93.504
2QZ-272-Spot 275	325.294	80578.4	10.5468	12.559	1.09433	2.20994	3.02011	0.201382	2.81488	0.932044	1182.74	30.4174	1184.19	21.1154	1187.72	21.621	1187.72	21.621	99.5812
2QZ-272-Spot 254	153.459	42998.5	1.17637	12.4994	1.17293	2.31233	3.07963	0.209714	2.84752	0.92463	1227.29	31.8224	1216.08	21.8329	1197.1	23.1167	1197.1	23.1167	102.522
2QZ-272-Spot 120	282.24	40941.8	1.99205	12.3643	1.10734	2.36427	3.23368	0.212107	3.03817	0.93954	1240.03	34.2728	1231.88	23.0785	1218.46	21.7722	1218.46	21.7722	101.77
2QZ-272-Spot 49	52.0347	31562.4	3.18179	12.032	1.23654	2.24865	3.21985	0.196312	2.97294	0.923317	1155.48	31.4493	1196.36	22.6337	1271.86	24.1287	1271.86	24.1287	90.8496
2QZ-272-Spot 119	57.9796	22471.6	2.36353	12.0209	1.01283	2.19599	3.31675	0.191538	3.15832	0.952235	1129.7	32.7285	1179.77	23.1442	1273.63	19.7571	1273.63	19.7571	88.6997
2QZ-272-Spot 183	155.8	28567.4	2.33648	11.8755	1.08121	2.6302	3.23254	0.226636	3.04636	0.942404	1316.84	36.2842	1309.12	23.7854	1297.32	21.021	1297.32	21.021	101.505
2QZ-272-Spot 158	293.243	70530.3	1.49875	11.7891	0.935834	2.54294	2.60858	0.217523	2.43494	0.933433	1268.77	28.0438	1284.42	19.0133	1311.5	18.158	1311.5	18.158	96.7418
2QZ-272-Spot 64	61.3237	45851.6	1.39905	11.7787	1.17234	2.51162	2.73872	0.214654	2.47511	0.903749	1253.56	28.1969	1275.4	19.892	1313.22	22.7411	1313.22	22.7411	95.4576
2QZ-272-Spot 36	462.075	40143	5.0378	11.744	0.986707	2.58217	2.90759	0.220034	2.73504	0.940658	1282.06	31.7983	1295.6	21.2846	1318.93	19.124	1318.93	19.124	97.2042
2QZ-272-Spot 166	141.949	251911	2.43321	11.7351	0.712573	2.66768	2.89689	0.227147	2.80788	0.969275	1319.53	33.5052	1319.55	21.3978	1320.41	13.8083	1320.41	13.8083	99.9335
2QZ-272-Spot 161	561.281	50285.9	10.0112	11.7295	1.12596	2.45886	3.00561	0.209268	2.78674	0.927179	1224.92	31.0883	1260.03	21.6985	1321.32	21.8166	1321.32	21.8166	92.7037
2QZ-272-Spot 65	649.584	554871	3.149	11.6588	1.12809	2.67751	3.64703	0.226503	3.46817	0.950959	1316.14	41.2885	1322.27	26.9679	1333.03	21.8215	1333.03	21.8215	98.7333
2QZ-272-Spot 31	136.477	34228.4	2.68181	11.6395	1.27386	2.69547	2.97799	0.227644	2.69179	0.903893	1322.14	32.1771	1327.21	22.059	1336.23	24.6304	1336.23	24.6304	98.9454
2QZ-272-Spot 146	50.1064	7128.85	2.69682	11.6142	1.40957	2.71652	3.48059	0.228923	3.18239	0.914326	1328.85	38.2157	1332.98	25.8376	1340.44	27.2399	1340.44	27.2399	99.1351
2QZ-272-Spot 28	39.251	10728.7	1.44866	11.6085	1.30719	2.60823	2.96736	0.219691	2.66392	0.897741	1280.24	30.9318	1302.96	21.7831	1341.39	25.2572	1341.39	25.2572	95.4416
2QZ-272-Spot 8	79.7224	32207.6	5.02486	11.5569	1.15681	2.60837	2.97228	0.218724	2.73793	0.921154	1275.13	31.6764	1303	21.8195	1350	22.3259	1350	22.3259	94.4543
2QZ-272-Spot 266	41.4103	46520.2	2.66696	11.5512	1.21587	2.58467	3.23591	0.216631	2.99879	0.926724	1264.05	34.4215	1296.31	23.6952	1350.95	23.4625	1350.95	23.4625	93.5675
2QZ-272-Spot 204	78.5178	15276.6	2.86663	11.4708	1.22376	2.77587	2.88515	0.231037	2.61276	0.905588	1339.93	31.6105	1349.07	21.54	1364.41	23.5704	1364.41	23.5704	98.2062
2QZ-272-Spot 224	826.845	30039	5.91554	11.4159	1.02902	2.41126	3.41975	0.199729	3.26126	0.953655	1173.86	34.9998	1245.96	24.5493	1373.65	19.7933	1373.65	19.7933	85.4555
2QZ-272-Spot 239	219.71	564300	2.11994	11.3898	1.23431	2.69484	3.53302	0.222708	3.31039	0.936987	1296.17	38.8701	1327.04	26.1704	1378.06	23.728	1378.06	23.728	94.0577
2QZ-272-Spot 282	82.1607	189198	0.76671	11.3861	1.30002	2.71301	2.73906	0.224138	2.41088	0.880188	1303.7	28.4566	1332.02	20.3242	1378.67	24.9891	1378.67	24.9891	94.5625
2QZ-272-Spot 281	1198.24	104148	1.09152	11.3741	1.03385	2.9223	2.98557	0.241173	2.80086	0.938131	1392.79	35.084	1387.7	22.5899	1380.7	19.8672	1380.7	19.8672	100.875
2QZ-272-Spot 83	119.566	15288	3.01394	11.3472	0.964329	2.85978	3.00264	0.235455	2.84357	0.947025	1363.02	34.9355	1371.39	22.593	1385.25	18.5198	1385.25	18.5198	98.3953
2QZ-272-Spot 291	88.2295	117670	2.10642	11.2897	1.32862	2.68864	3.14456	0.220243	2.85009	0.906356	1283.16	33.1616	1325.34	23.2773	1395	25.4807	1395	25.4807	91.9825
2QZ-272-Spot 261	220.38	13651.9	1.00323	11.2784	1.6201	2.61374	2.98709	0.213893	2.50957	0.84014	1249.52	28.506	1304.51	21.9407	1396.92	31.0647	1396.92	31.0647	89.4486
2QZ-272-Spot 293	93.1011	11824.6	1.89867	11.2622	1.25258	2.85275	2.74508	0.233117	2.44264	0.889826	1350.82	29.7681	1369.54	20.6413	1399.67	24.0069	1399.67	24.0069	96.5094
2QZ-272-Spot 210	742.401	92832.9	2.48726	11.1321	0.706399	3.04563	2.30948	0.246004	2.1988	0.952074	1417.83	27.9852	1419.14	17.6555	1421.91	13.4976	1421.91	13.4976	99.7135
2QZ-272-Spot 179	77.6767	16707.8	1.86886	10.9834	1.28716	3.07074	3.31603	0.244718	3.05602	0.921591	1411.18	38.7325	1425.42	25.4044	1447.56	24.5101	1447.56	24.5101	97.4864
2QZ-272-Spot 299	800.459	208879	4.56175	10.9755	1.02768	3.16265	2.98454	0.251863	2.80202	0.938847	1448.07	36.3414	1448.09	23.0283	1448.93	19.5652	1448.93	19.5652	99.9412
2QZ-272-Spot 136	98.8386	14700.3	2.0204	10.9645	1.14386	3.0959	2.7401	0.246298	2.48993	0.908699	1419.36	31.7211	1431.68	21.0327	1450.84	21.7715	1450.84	21.7715	97.8298
2QZ-272-Spot 62	224.948	1.05584e+06	1.52822	10.9564	1.11584	3.19316	3.30734	0.253849	3.11342	0.941368	1458.3	40.6343	1455.51	25.5788	1452.24	21.2341	1452.24	21.2341	100.417
2QZ-272-Spot 162	425.155	70608.2	2.82144	10.9302	0.797491	3.27247	2.58785	0.259533	2.46191	0.951332	1487.45	32.7021	1474.53	20.129	1456.79	15.1665	1456.79	15.1665	102.105
2QZ-272-Spot 248	362.65	832083	1.2882	10.8983	1.36102	3.15253	3.32748	0.249291	3.0364	0.912523	1434.82	39.0594	1445.62	25.6557	1462.35	25.8651	1462.35	25.8651	98.117
2QZ-272-Spot 118	199.82	44799.8	0.699938	10.8925	1.02792	3.28861	2.65112	0.259913	2.44373	0.921773	1489.4	32.4985	1478.36	20.645	1463.36	19.5317	1463.36	19.5317	101.779
2QZ-272-Spot 53	208.53	20673.4	1.42914	10.8815	0.919351	3.13319	2.73402	0.247379	2.57481	0.941768	1424.95	32.9178	1440.88	21.0472	1465.29	17.4642	1465.29	17.4642	97.247
2QZ-272-Spot 306	130.802	30770.4	2.71864	10.8739	1.27715	3.28202	3.76937	0.258948	3.54641	0.94085	1484.46	47.0241	1476.8	29.3435	1466.62	24.2572	1466.62	24.2572	101.217
2QZ-272-Spot 72	402.44	115312	2.12348	10.8177	1.01892	3.34086	2.92845	0.262229	2.74547	0.937517	1501.24	36.769	1490.65	22.8888	1476.44	19.3268	1476.44	19.3268	101.679
2QZ-272-Spot 56	228.582	71231.7	1.50086	10.7557	1.25983	3.31389	3.378	0.258621	3.13428	0.92785	1482.78	41.5174	1484.33	26.3546	1487.34	23.8618	1487.34	23.8618	99.6934
2QZ-272-Spot 263	324.268	95556	1.3083	10.5816	1.12187	3.32656	2.14429	0.255408	1.82739	0.852216	1466.31	23.9664	1487.31	16.7419	1518.19	21.1599	1518.19	21.1599	96.5826
2QZ-272-Spot 1	156.693	31838.2	1.85245	10.4419	1.04444	3.67792	2.99198	0.278656	2.80377	0.937093	1584.59	39.3895	1566.59	23.8901	1543.21	19.6357	1543.21	19.6357	102.681
2QZ-272-Spot 241	372.581	115586	1.86448	10.3532	2.24587	3.31033	3.44215	0.248675	2.60854	0.757823	1431.64	33.4891	1483.49	26.8486	1559.23	42.1351	1559.23	42.1351	91.817
2QZ-272-Spot 252	99.9556	37017.3	1.94742	10.33	1.32289	3.05312	3.223	0.228839	2.93899	0.911881	1328.41	35.2823	1421.02	24.6564	1563.44	24.8035	1563.44	24.8035	84.967
2QZ-272-Spot 209	117.06	25707.1	1.4514	10.305	1.17504	3.62438	2.74523	0.271	2.48104	0.903765	1545.88	34.102	1554.9	21.8502	1567.98	22.0179	1567.98	22.0179	98.5904
2QZ-272-Spot 226	488.931	53071.5	1.16039	10.285	1.10497	3.6859	2.86119	0.275065	2.63921	0.922419	1566.46	36.7028	1568.32	22.856	1571.62	20.6947	1571.62	20.6947	99.6715
2QZ-272-Spot 21	108.023	87282.6	1.80949	10.2413	1.15943	3.57674	3.47162	0.265785	3.27229	0.942582	1519.37	44.2943	1544.39	27.555	1579.59	21.6924	1579.59	21.6924	96.1878
2QZ-272-Spot 194	36.9016	4355.43	1.16131	10.1981	1.54441	3.63449	2.87746	0.268938	2.42788	0.843757	1535.41	33.1711	1557.12	22.9168	1587.48	28.8666	1587.48	28.8666	96.7195
2QZ-272-Spot 51	112.092	95127.9	1.26631	10.1531	1.21278	3.65481	2.84907	0.269247	2.57805	0.904876	1536.98	35.2549	1561.56	22.7179	1595.75	22.6429	1595.75	22.6429	96.3169
2QZ-272-Spot 160	674.682	1.05738e+06	2.23321	10.1351	1.12099	3.81852	2.72128	0.280809	2.47966	0.911212	1595.43	35.0463	1596.66	21.9004	1599.06	20.9216	1599.06	20.9216	99.7731
2QZ-272-Spot 222	99.4044	36663.5	1.01554	10.1251	1.09128	3.83175	2.89659	0.281504	2.68316	0.926316	1598.93	37.9956	1599.44	23.3284	1600.91	20.3605	1600.91	20.3605	99.8766
2QZ-272-Spot 132	57.4553	12049	0.905957	10.0419	1.46071	3.69036	3.31962	0.268889	2.98097	0.897986	1535.16	40.7222	1569.28	26.5264	1616.28	27.2002	1616.28	27.2002	94.9811
2QZ-272-Spot 138	95.7791	680167	1.07834	10.0258	1.11431	3.87152	2.66347	0.281636	2.41917	0.908277	1599.6	34.2699	1607.76	21.4961	1619.28	20.7409	1619.28	20.7409	98.7845
2QZ-272-Spot 38	509.196	309293	3.31083	10.0202	0.897444	4.0351	2.66886	0.293371	2.51344	0.941767	1658.35	36.7524	1641.3	21.7204	1620.32	16.7015	1620.32	16.7015	102.347
2QZ-272-Spot 312	201.343	34894.1	3.18197	10.0125	1.09304	4.02453	2.68836	0.29238	2.45612	0.913614	1653.41	35.8204	1639.17	21.8678	1621.73	20.3384	1621.73	20.3384	101.953
2QZ-272-Spot 121	350.925	117231	6.09172	10.0045	1.25316	3.95352	3.18583	0.286989	2.92901	0.919386	1626.47	42.1052	1624.71	25.8235	1623.23	23.3138	1623.23	23.3138	100.199
2QZ-272-Spot 245	344.907	86232.1	10.0121	10.0037	0.922756	3.95229	2.6983	0.286879	2.53561	0.939708	1625.91	36.439	1624.46	21.869	1623.37	17.1659	1623.37	17.1659	100.156
2QZ-272-Spot 13	205.218	5488.45	2.22193	9.98989	2.98438	3.32113	4.47473	0.240732	3.33416	0.745109	1390.5	41.703	1486.03	34.9346	1625.95	55.5113	1625.95	55.5113	85.5196
2QZ-272-Spot 59	107.36	33947.6	1.8735	9.96968	1.19866	3.7423	2.87322	0.270712	2.61125	0.908822	1544.42	35.8617	1580.47	23.0262	1629.71	22.2811	1629.71	22.2811	94.7662
2QZ-272-Spot 19	521.06	74509.2	5.75961	9.96747	1.04781	3.65459	2.91037	0.264309	2.7152	0.932942	1511.85	36.5918	1561.51	23.2065	1630.12	19.4757	1630.12	19.4757	92.7444
2QZ-272-Spot 76	92.9153	35120.1	1.96676	9.96366	0.879785	3.87205	2.60439	0.279929	2.45129	0.941215	1591	34.5604	1607.87	21.0198	1630.83	16.3507	1630.83	16.3507	97.5576
2QZ-272-Spot 257	86.9624	20514.4	1.7491	9.95647	1.16062	3.96327	2.57999	0.286317	2.3042	0.893102	1623.1	33.0629	1626.71	20.9216	1632.18	21.567	1632.18	21.567	99.4438
2QZ-272-Spot 292	276.124	39195.3	3.92464	9.91477	1.05987	4.07954	2.8957	0.293482	2.69476	0.930609	1658.91	39.4154	1650.22	23.6183	1639.97	19.6749	1639.97	19.6749	101.155
2QZ-272-Spot 301	283.424	143453	1.42473	9.90963	1.13179	4.02829	3.17903	0.289645	2.97074	0.93448	1639.75	43.0115	1639.92	25.8654	1640.93	21.0075	1640.93	21.0075	99.9281
2QZ-272-Spot 277	74.6358	109023	1.29379	9.89548	0.928399	3.93055	2.34802	0.282214	2.15668	0.918511	1602.5	30.6003	1619.99	19.0082	1643.59	17.2276	1643.59	17.2276	97.5003
2QZ-272-Spot 274	131.231	70199.1	1.3857	9.89524	0.826872	4.04442	2.30464	0.290383	2.1512	0.93342	1643.44	31.2072	1643.18	18.7641	1643.63	15.3435	1643.63	15.3435	99.9884
2QZ-272-Spot 308	371.597	103372	4.83499	9.89479	1.1218	4.15118	2.67399	0.298034	2.4273	0.907744	1681.55	35.9274	1664.44	21.8837	1643.71	20.8147	1643.71	20.8147	102.302
2QZ-272-Spot 25	66.271	8971.3	1.36005	9.88772	1.27959	4.10907	3.23442	0.2948	2.97054	0.918416	1665.47	43.5999	1656.11	26.4196	1645.04	23.7388	1645.04	23.7388	101.242
2QZ-272-Spot 41	125.856	39778.8	1.93605	9.88606	1.38886	4.03267	3.22332	0.28927	2.90876	0.90241	1637.88	42.0719	1640.81	26.2316	1645.35	25.7636	1645.35	25.7636	99.5458
2QZ-272-Spot 177	63.8908	36755.5	1.17895	9.87607	1.34118	4.02089	3.53656	0.288134	3.27238	0.925301	1632.2	47.187	1638.43	28.7652	1647.23	24.8747	1647.23	24.8747	99.0874
2QZ-272-Spot 315	163.473	120000	0.718965	9.8701	1.13258	3.97431	3.51747	0.284624	3.33015	0.946744	1614.61	47.5647	1628.97	28.5433	1648.35	21.0022	1648.35	21.0022	97.953
2QZ-272-Spot 171	553.266	289217	3.35704	9.86804	1.17176	3.62856	2.81526	0.259808	2.55982	0.909266	1488.86	34.0315	1555.82	22.4134	1648.74	21.7277	1648.74	21.7277	90.3032
2QZ-272-Spot 195	388.313	98666	1.55152	9.81138	0.949812	4.092	2.75891	0.291308	2.59026	0.93887	1648.06	37.6694	1652.71	22.5157	1659.41	17.5877	1659.41	17.5877	99.3164
2QZ-272-Spot 297	820.53	303117	3.46037	9.80282	1.0264	3.44869	2.65768	0.245297	2.45148	0.922415	1414.18	31.1294	1515.57	20.9226	1661.02	19.002	1661.02	19.002	85.1389
2QZ-272-Spot 151	354.82	43863.2	1.06201	9.80258	0.989913	3.88688	2.18609	0.276458	1.94912	0.8916	1573.5	27.2133	1610.96	17.6568	1661.07	18.3264	1661.07	18.3264	94.7281
2QZ-272-Spot 284	112.132	552141	1.06057	9.78949	0.779276	4.05763	3.23539	0.288217	3.14014	0.97056	1632.61	45.2903	1645.83	26.3621	1663.54	14.4218	1663.54	14.4218	98.141
2QZ-272-Spot 295	144.971	49306.6	1.333	9.77388	1.11378	3.97988	3.56078	0.282244	3.3821	0.949822	1602.66	47.9919	1630.1	28.903	1666.49	20.6056	1666.49	20.6056	96.1694
2QZ-272-Spot 80	95.5626	34021	1.63995	9.76792	1.08108	4.15479	3.42872	0.294469	3.25382	0.948991	1663.82	47.7164	1665.15	28.0679	1667.62	19.9978	1667.62	19.9978	99.7722
2QZ-272-Spot 116	110.144	66540.1	1.5975	9.73812	1.18096	4.17737	2.86337	0.295166	2.60849	0.910987	1667.29	38.3225	1669.59	23.4627	1673.27	21.8298	1673.27	21.8298	99.6426
2QZ-272-Spot 126	718.309	55522.2	5.07106	9.73161	1.22605	3.35059	3.02675	0.236589	2.76731	0.914285	1368.94	34.1309	1492.93	23.6732	1674.51	22.66	1674.51	22.66	81.7516
2QZ-272-Spot 71	136.535	33686.3	0.99799	9.71074	1.18439	4.13068	3.07574	0.291046	2.83856	0.922885	1646.75	41.2517	1660.39	25.1487	1678.47	21.8788	1678.47	21.8788	98.1102
2QZ-272-Spot 242	68.6219	40601.9	1.72475	9.69035	1.33782	4.04421	2.82977	0.284355	2.49356	0.881189	1613.26	35.5892	1643.13	23.0408	1682.36	24.6996	1682.36	24.6996	95.8927
2QZ-272-Spot 280	111.275	2.39011e+07	1.45387	9.67156	1.17573	4.07134	2.53227	0.285707	2.24278	0.885678	1620.04	32.1283	1648.58	20.645	1685.94	21.6983	1685.94	21.6983	96.0914
2QZ-272-Spot 152	47.8861	1827.43	0.82024	9.65727	3.63205	3.65831	5.11458	0.256343	3.60098	0.704063	1471.11	47.3654	1562.32	40.8061	1688.67	67.0271	1688.67	67.0271	87.1164
2QZ-272-Spot 61	677.671	264566	1.152	9.53672	1.11564	4.4526	2.93275	0.308106	2.71227	0.92482	1731.38	41.1826	1722.18	24.3219	1711.8	20.5218	1711.8	20.5218	101.144
2QZ-272-Spot 57	120.731	17415.3	1.80091	9.53567	1.18068	4.29215	3.40536	0.296971	3.19413	0.937972	1676.27	47.1479	1691.86	28.0509	1712.01	21.7179	1712.01	21.7179	97.9125
2QZ-272-Spot 107	243.305	9727.46	4.06737	9.52431	0.961413	4.29475	3.04167	0.296797	2.88573	0.948732	1675.41	42.5763	1692.36	25.0566	1714.2	17.6792	1714.2	17.6792	97.7368
2QZ-272-Spot 247	146.898	50316.2	2.13795	9.49223	0.919935	3.77012	2.78745	0.259664	2.63128	0.943971	1488.12	34.966	1586.41	22.3735	1720.4	16.9049	1720.4	16.9049	86.4985
2QZ-272-Spot 94	608.774	59398	4.4183	9.4821	1.01087	4.40647	3.4116	0.303168	3.2584	0.955094	1707	48.8668	1713.56	28.2408	1722.36	18.5714	1722.36	18.5714	99.1079
2QZ-272-Spot 199	806.54	22180.1	5.39518	9.4198	0.821245	4.21712	3.0382	0.288234	2.9251	0.962774	1632.7	42.1905	1677.36	24.9413	1734.47	15.0629	1734.47	15.0629	94.1325
2QZ-272-Spot 113	179.956	43891.6	1.5936	9.38257	0.796213	4.59054	3.03299	0.312517	2.92662	0.964927	1753.08	44.922	1747.55	25.293	1741.73	14.5905	1741.73	14.5905	100.652
2QZ-272-Spot 157	343.934	511139	2.27527	9.32327	0.989294	4.55844	3.14164	0.30837	2.98181	0.949126	1732.68	45.305	1741.7	26.1665	1753.33	18.1031	1753.33	18.1031	98.8221
2QZ-272-Spot 102	249.952	163146	2.01682	9.29705	1.21661	4.67675	3.33933	0.315484	3.10981	0.93127	1767.64	48.0786	1763.09	27.941	1758.49	22.2474	1758.49	22.2474	100.52
2QZ-272-Spot 249	139.578	50459.4	2.35028	9.25952	1.10629	4.66807	3.38381	0.313627	3.19785	0.945046	1758.53	49.2183	1761.54	28.3041	1765.88	20.2128	1765.88	20.2128	99.5837
2QZ-272-Spot 185	166.377	24876	3.0614	9.22197	0.938189	4.65435	3.03849	0.311437	2.89002	0.951137	1747.78	44.2434	1759.08	25.4012	1773.3	17.1252	1773.3	17.1252	98.5605
2QZ-272-Spot 12	213.284	30740.1	5.81139	9.2073	1.14991	4.48102	3.12303	0.299362	2.90362	0.929746	1688.15	43.1253	1727.46	25.9308	1776.21	20.9829	1776.21	20.9829	95.042
2QZ-272-Spot 300	525.909	140618	2.21215	9.17095	1.04472	4.89177	2.87802	0.325513	2.68171	0.931789	1816.59	42.4542	1800.84	24.2676	1783.42	19.0463	1783.42	19.0463	101.86
2QZ-272-Spot 78	153.264	282656	2.32104	9.16531	0.86587	4.84235	2.66501	0.322026	2.52043	0.945748	1799.62	39.5776	1792.29	22.432	1784.54	15.783	1784.54	15.783	100.845
2QZ-272-Spot 184	59.0755	19222.1	1.4128	9.14149	1.05624	4.81872	2.88921	0.319622	2.68921	0.93078	1787.88	41.9891	1788.17	24.2994	1789.28	19.2424	1789.28	19.2424	99.9215
2QZ-272-Spot 135	662.483	108781	5.47141	9.13495	0.933582	4.54899	2.7612	0.301515	2.59858	0.941107	1698.81	38.8078	1739.98	22.9881	1790.59	17.0048	1790.59	17.0048	94.8747
2QZ-272-Spot 229	200.248	24378.1	1.34383	9.08715	1.09854	4.56611	3.20535	0.301066	3.01123	0.939438	1696.59	44.9192	1743.1	26.7055	1800.14	19.9864	1800.14	19.9864	94.2479
2QZ-272-Spot 147	150.124	83345.8	1.29831	9.05122	1.21402	4.66864	2.99364	0.306609	2.73643	0.91408	1724	41.395	1761.64	25.0397	1807.34	22.0683	1807.34	22.0683	95.3886
2QZ-272-Spot 235	128.823	21689.6	1.04565	9.05106	1.23922	4.77762	2.90266	0.313761	2.62484	0.904286	1759.19	40.4118	1780.97	24.3765	1807.38	22.5264	1807.38	22.5264	97.3338
2QZ-272-Spot 305	165.002	49779.2	2.58073	9.04933	1.15028	4.86355	2.95583	0.319343	2.72283	0.921172	1786.52	42.4859	1795.96	24.8994	1807.72	20.9084	1807.72	20.9084	98.8271
2QZ-272-Spot 288	556.058	137571	2.06078	9.04781	1.04827	4.42718	2.85575	0.290642	2.65639	0.930192	1644.74	38.5628	1717.44	23.6582	1808.03	19.0532	1808.03	19.0532	90.9684
2QZ-272-Spot 258	177.922	505979	1.50141	9.03531	1.07646	4.93254	2.63903	0.323371	2.4095	0.913027	1806.17	37.9551	1807.84	22.283	1810.54	19.5596	1810.54	19.5596	99.7586
2QZ-272-Spot 122	108.402	61091	1.38196	9.01598	1.02611	4.77604	2.79535	0.312441	2.60021	0.93019	1752.71	39.9044	1780.7	23.4737	1814.43	18.6358	1814.43	18.6358	96.5982
2QZ-272-Spot 90	97.4604	15178	1.86818	9.0108	1.05131	3.87796	3.09001	0.253545	2.90567	0.940343	1456.73	37.8864	1609.11	24.9484	1815.48	19.091	1815.48	19.091	80.2396
2QZ-272-Spot 134	291.859	42481.8	1.26007	8.93062	1.07084	4.68298	2.88215	0.303453	2.67584	0.928417	1708.41	40.1587	1764.2	24.1198	1831.69	19.4073	1831.69	19.4073	93.2697
2QZ-272-Spot 82	180.933	108352	2.00008	8.90295	1.10634	5.04631	3.02164	0.325984	2.81182	0.93056	1818.89	44.5626	1827.13	25.6123	1837.31	20.0372	1837.31	20.0372	98.9972
2QZ-272-Spot 141	379.344	73386.1	1.56192	8.89861	1.13163	5.13381	2.48227	0.331474	2.20931	0.890039	1845.52	35.4566	1841.72	21.0984	1838.19	20.493	1838.19	20.493	100.399
2QZ-272-Spot 197	150.216	123546	1.70752	8.8885	0.989569	5.13518	2.1421	0.331186	1.89983	0.8869	1844.13	30.4698	1841.95	18.2073	1840.25	17.9155	1840.25	17.9155	100.211
2QZ-272-Spot 272	619.832	234817	3.12047	8.88815	1.01312	4.74606	3.00747	0.306078	2.83168	0.941552	1721.38	42.7792	1775.41	25.228	1840.32	18.3418	1840.32	18.3418	93.5368
2QZ-272-Spot 178	138.296	1.92635e+06	0.543923	8.76571	1.44089	5.37692	3.52523	0.341986	3.2173	0.912652	1896.22	52.8543	1881.18	30.1903	1865.4	26.0068	1865.4	26.0068	101.652
2QZ-272-Spot 260	96.4145	32794.6	2.17294	8.74371	0.961203	5.27632	2.9156	0.334746	2.7526	0.944094	1861.34	44.5025	1865.04	24.8926	1869.93	17.3396	1869.93	17.3396	99.5406
2QZ-272-Spot 133	369.002	199428	1.55209	8.72457	1.26479	4.6176	3.13345	0.292313	2.86685	0.914918	1653.08	41.8032	1752.45	26.1586	1873.89	22.8043	1873.89	22.8043	88.2166
2QZ-272-Spot 294	645.442	79800.3	2.82688	8.69636	1.20232	4.40853	3.02593	0.278175	2.77681	0.917672	1582.17	38.9581	1713.94	25.049	1879.72	21.6644	1879.72	21.6644	84.1702
2QZ-272-Spot 20	238.917	2.05574e+06	2.20619	8.69583	0.987055	5.08393	3.03239	0.320773	2.86725	0.945541	1793.5	44.8911	1833.43	25.7349	1879.83	17.7848	1879.83	17.7848	95.4076
2QZ-272-Spot 149	101.404	30831.4	1.11122	8.69191	1.07691	5.05848	3.09451	0.319024	2.90108	0.937492	1784.96	45.233	1829.17	26.2407	1880.65	19.4021	1880.65	19.4021	94.912
2QZ-272-Spot 211	560.546	456314	1.83149	8.65875	0.772938	5.10077	2.76721	0.320464	2.65707	0.960198	1791.99	41.5699	1836.23	23.4963	1887.53	13.9134	1887.53	13.9134	94.9386
2QZ-272-Spot 46	603.8	100341	12.0727	8.65014	0.913469	4.99011	2.63196	0.3132	2.46836	0.93784	1756.43	37.9509	1817.65	22.2666	1889.32	16.44	1889.32	16.44	92.9664
2QZ-272-Spot 108	100.223	205897	2.08895	8.61334	0.925996	5.29199	2.90832	0.330733	2.75697	0.947958	1841.94	44.1717	1867.57	24.8422	1896.99	16.6502	1896.99	16.6502	97.098
2QZ-272-Spot 115	172.463	29136	8.43822	8.40881	1.13477	5.46445	2.80304	0.333402	2.56306	0.914389	1854.85	41.3134	1895.03	24.0633	1940.09	20.3006	1940.09	20.3006	95.6066
2QZ-272-Spot 17	196.068	296314	2.43929	8.38228	1.16062	5.02641	3.34006	0.305709	3.13192	0.937685	1719.56	47.2714	1823.78	28.2941	1945.74	20.7473	1945.74	20.7473	88.3754
2QZ-272-Spot 97	587.975	17822	1.98592	8.28656	1.23161	4.97884	3.08972	0.299357	2.83364	0.917119	1688.12	42.0853	1815.73	26.131	1966.24	21.9657	1966.24	21.9657	85.8551
2QZ-272-Spot 155	32.4613	937117	2.47632	8.00591	1.05443	5.66925	2.57887	0.329325	2.35345	0.912591	1835.11	37.5856	1926.7	22.2627	2027.47	18.6721	2027.47	18.6721	90.5121
2QZ-272-Spot 139	203.959	73363.7	2.25352	7.95277	1.12695	6.031	3.07412	0.348013	2.86011	0.930382	1925.1	47.6003	1980.33	26.7808	2039.26	19.9295	2039.26	19.9295	94.4022
2QZ-272-Spot 219	455.424	20422	1.5758	7.90027	1.36215	5.4942	3.26378	0.314944	2.96594	0.908744	1764.99	45.7946	1899.69	28.044	2050.96	24.0552	2050.96	24.0552	86.0568
2QZ-272-Spot 238	61.6106	71900.1	0.897026	7.86158	0.875774	6.31341	3.18497	0.360132	3.0622	0.961453	1982.8	52.2687	2020.32	27.9247	2059.63	15.4508	2059.63	15.4508	96.2698
2QZ-272-Spot 256	44.7973	12116.9	1.3378	7.79062	0.859253	5.68847	2.85437	0.321555	2.72197	0.953614	1797.32	42.6951	1929.62	24.6544	2075.61	15.1318	2075.61	15.1318	86.5925
2QZ-272-Spot 63	50.2156	19882.6	0.885175	7.66169	1.18359	6.69007	3.32136	0.371914	3.10331	0.93435	2038.4	54.2337	2071.31	29.3472	2104.95	20.7757	2104.95	20.7757	96.8383
2QZ-272-Spot 228	141.105	35945.2	1.76577	7.57414	1.12632	6.94129	2.9951	0.381471	2.77525	0.926597	2083.15	49.4025	2103.95	26.5882	2125.1	19.7258	2125.1	19.7258	98.0261
2QZ-272-Spot 77	61.9716	113020	3.28323	7.53535	1.08488	7.28287	2.71934	0.398193	2.49356	0.916973	2160.71	45.7796	2146.71	24.2827	2134.09	18.9807	2134.09	18.9807	101.248
2QZ-272-Spot 227	58.2131	30332.2	0.638917	7.34258	1.23584	7.39654	2.72131	0.394062	2.42451	0.890934	2141.64	44.1805	2160.55	24.3455	2179.31	21.5144	2179.31	21.5144	98.2713
2QZ-272-Spot 230	31.3668	11163.8	1.37251	6.47531	1.1271	8.91946	3.42796	0.41907	3.23737	0.9444	2256.26	61.632	2329.79	31.3079	2395.58	19.1747	2395.58	19.1747	94.1842
2QZ-272-Spot 186	93.0374	105842	0.751907	6.24577	1.10845	10.0055	2.90117	0.453432	2.68107	0.924134	2410.49	53.9205	2435.29	26.7875	2456.79	18.7397	2456.79	18.7397	98.1155
2QZ-272-Spot 33	126.754	65275	1.01511	6.16148	0.913587	9.52826	2.62049	0.425977	2.45608	0.93726	2287.56	47.298	2390.28	24.0852	2479.73	15.4092	2479.73	15.4092	92.2501
2QZ-272-Spot 106	176.307	30562.1	2.36927	6.07016	1.454	9.57619	2.86027	0.421775	2.46313	0.861153	2268.53	47.1045	2394.89	26.3025	2504.89	24.4651	2504.89	24.4651	90.5641
2QZ-272-Spot 30	985.009	1.19024e+06	8.33893	6.05866	1.02212	10.695	2.60363	0.470158	2.39461	0.919721	2484.25	49.3675	2496.99	24.1808	2508.08	17.1913	2508.08	17.1913	99.0499
2QZ-272-Spot 196	130.101	35978.3	0.601801	5.67255	1.066	12.0802	3.17009	0.497212	2.98549	0.941766	2601.8	63.9154	2610.65	29.7362	2618.24	17.7407	2618.24	17.7407	99.3723
2QZ-272-Spot 37	384.521	20975.4	1.87746	5.61559	1.23586	10.0111	2.81963	0.407911	2.53436	0.898826	2205.36	47.3352	2435.81	26.0356	2635.02	20.5314	2635.02	20.5314	83.6944
2QZ-272-Spot 180	59.7381	21507.1	1.40801	5.57298	1.31127	12.7397	3.57613	0.51515	3.32706	0.93035	2678.58	72.9247	2660.6	33.681	2647.66	21.7584	2647.66	21.7584	101.168
2QZ-272-Spot 98	109.058	110327	1.76826	5.51917	0.870246	12.3322	2.30042	0.493857	2.12947	0.925684	2587.34	45.3825	2630.03	21.6094	2663.75	14.42	2663.75	14.42	97.1316
2QZ-272-Spot 246	194.2	121419	2.37001	5.49878	0.922947	12.1165	3.20691	0.483426	3.07123	0.957691	2542.17	64.5222	2613.46	30.0887	2669.88	15.2844	2669.88	15.2844	95.2167
2QZ-272-Spot 85	109.165	63634.1	2.62297	5.48331	1.28099	12.8254	3.73148	0.510271	3.50472	0.939229	2657.79	76.3374	2666.91	35.1624	2674.54	21.2016	2674.54	21.2016	99.3735
2QZ-272-Spot 174	153.442	502839	1.02433	5.46062	1.03926	12.9029	3.01338	0.51123	2.8285	0.938646	2661.88	61.6841	2672.58	28.404	2681.41	17.1887	2681.41	17.1887	99.2717
2QZ-272-Spot 213	321.507	4.02037e+06	3.39474	5.44021	2.09628	11.1388	3.71771	0.439685	3.07033	0.825868	2349.23	60.4493	2534.81	34.6526	2687.6	34.6577	2687.6	34.6577	87.4101
2QZ-272-Spot 48	87.0395	14641.7	1.56727	5.42765	0.841937	12.0223	2.52951	0.473465	2.38528	0.942981	2498.74	49.41	2606.15	23.7162	2691.41	13.9114	2691.41	13.9114	92.8411
2QZ-272-Spot 88	154.106	31952.3	3.70488	5.41571	1.05758	13.1244	2.75578	0.515732	2.54477	0.92343	2681.05	55.8187	2688.64	26.0064	2695.05	17.4695	2695.05	17.4695	99.4806
2QZ-272-Spot 290	73.3932	68928.5	0.442431	5.38168	0.830436	13.3679	2.31596	0.521999	2.16196	0.933503	2707.65	47.8001	2705.99	21.8826	2705.46	13.7066	2705.46	13.7066	100.081
2QZ-272-Spot 206	92.4047	17551.4	1.45581	5.35336	1.23861	13.3949	2.58673	0.520301	2.2709	0.877906	2700.46	50.1015	2707.9	24.4453	2714.17	20.4273	2714.17	20.4273	99.4949
2QZ-272-Spot 42	64.2807	17732.7	1.79891	5.30597	1.04194	13.0618	3.38236	0.502868	3.21787	0.95137	2626.11	69.4124	2684.12	31.912	2728.82	17.1568	2728.82	17.1568	96.2362
2QZ-272-Spot 221	91.0495	298234	1.16642	5.2982	1.14957	13.5223	2.90717	0.519835	2.67023	0.918498	2698.48	58.8773	2716.84	27.493	2731.23	18.9254	2731.23	18.9254	98.8009
2QZ-272-Spot 159	138.176	105812	2.82927	5.23749	1.13373	12.9412	2.97414	0.491797	2.74957	0.924494	2578.45	58.4348	2675.38	28.0399	2750.18	18.6321	2750.18	18.6321	93.7554
2QZ-272-Spot 123	198.925	77055.5	1.8144	5.02099	1.01833	12.0544	2.78086	0.43916	2.5877	0.930539	2346.88	50.9044	2608.65	26.0792	2819.35	16.6294	2819.35	16.6294	83.242
2QZ-272-Spot 23	128.105	649408	2.07969	4.5056	0.889042	17.372	2.51802	0.567925	2.35585	0.935596	2899.29	55.01	2955.61	24.1804	2994.85	14.2961	2994.85	14.2961	96.8094
SY-A							Isotope ratios						Apparent ages (Ma)
Analysis	U	206Pb	U/Th	206Pb*	±	207Pb*	±	206Pb*	±	error	206Pb*	±	207Pb*	±	206Pb*	±	Best age	±	Conc
	(ppm)	204Pb		207Pb*	(%)	235U*	(%)	238U	(%)	corr.	238U*	(Ma)	235U	(Ma)	207Pb*	(Ma)	(Ma)	(Ma)	(%)
SY-A-Spot 267	188.356	42156.3	0.736695	18.9204	1.28655	0.337588	1.69108	0.0463452	1.09751	0.648999	292.044	3.13369	295.343	4.33372	321.529	29.2278	292.044	3.13369	NA
SY-A-Spot 34	385.324	2.5571e+06	1.13407	18.7408	1.1294	0.345274	1.59981	0.0469505	1.13308	0.708257	295.772	3.27561	301.16	4.16922	343.105	25.5615	295.772	3.27561	NA
SY-A-Spot 13	425.728	46020.3	2.43061	14.6584	3.56287	0.487094	3.78973	0.0518067	1.29153	0.340796	325.604	4.10083	402.929	12.6048	874.358	73.8034	325.604	4.10083	NA
SY-A-Spot 135	1217.91	5679.08	2.3588	13.9004	1.34463	0.514333	2.18511	0.0518753	1.72241	0.788248	326.025	5.47584	421.359	7.53589	983.365	27.3779	326.025	5.47584	NA
SY-A-Spot 17	890.21	24035.7	4.07603	18.3994	0.729924	0.393578	1.67989	0.0525439	1.51302	0.900668	330.121	4.86906	336.98	4.8174	384.562	16.3997	330.121	4.86906	NA
SY-A-Spot 9	178.46	5896.86	2.12776	19.4854	1.87479	0.372168	2.20202	0.0526183	1.15501	0.524523	330.576	3.72194	321.259	6.0644	254.268	43.1313	330.576	3.72194	NA
SY-A-Spot 161	259.755	59017	3.39638	18.8427	0.997809	0.3921	1.65141	0.0536076	1.31588	0.796821	336.632	4.31601	335.902	4.72297	330.828	22.6204	336.632	4.31601	NA
SY-A-Spot 272	452.007	36131.9	2.29416	17.9763	0.9392	0.506634	1.48121	0.066082	1.14538	0.773272	412.507	4.57678	416.183	5.05752	436.592	20.9266	412.507	4.57678	94.4835
SY-A-Spot 91	241.434	20397.7	1.82144	18.0478	1.3271	0.510766	1.86947	0.0668856	1.31672	0.704326	417.365	5.3214	418.964	6.4177	427.755	29.6039	417.365	5.3214	97.5711
SY-A-Spot 87	370.787	170631	1.89862	17.8586	0.957274	0.517819	1.57914	0.0670985	1.25591	0.795314	418.651	5.09081	423.694	5.47034	451.202	21.2606	418.651	5.09081	92.7859
SY-A-Spot 172	139.917	94665.2	1.17732	17.7029	1.31392	0.525019	1.88607	0.0674384	1.35309	0.717416	420.704	5.51076	428.499	6.59315	470.621	29.103	420.704	5.51076	89.3935
SY-A-Spot 216	152.256	17102.2	1.5326	17.9464	1.30003	0.522662	1.68712	0.0680592	1.07531	0.637364	424.452	4.41716	426.928	5.88028	440.295	28.9252	424.452	4.41716	96.4018
SY-A-Spot 300	688.26	79047.8	3.26404	18.0727	0.96543	0.519106	1.39612	0.0680717	1.00851	0.722367	424.528	4.14348	424.554	4.84422	424.676	21.5394	424.528	4.14348	99.9653
SY-A-Spot 112	306.916	73340.8	1.38543	18.0189	0.960879	0.520998	1.43	0.0681162	1.05906	0.740601	424.797	4.35381	425.818	4.97365	431.326	21.4125	424.797	4.35381	98.4863
SY-A-Spot 169	523.461	31075.7	1.7289	18.1084	0.927551	0.520698	1.5321	0.0684152	1.21942	0.795913	426.601	5.03366	425.618	5.32677	420.274	20.709	426.601	5.03366	101.505
SY-A-Spot 225	723.086	34515.5	1.06027	18.0216	0.876432	0.528732	1.43731	0.0691381	1.13918	0.792577	430.961	4.74891	430.968	5.04764	430.982	19.5317	430.961	4.74891	99.9951
SY-A-Spot 100	35.0313	24836.1	1.88729	17.656	2.28943	0.539702	2.77599	0.0691408	1.56991	0.565533	430.977	6.54475	438.228	9.8805	476.482	50.647	430.977	6.54475	90.4499
SY-A-Spot 141	362.859	26509.9	126.557	17.8526	1.13031	0.535084	1.56977	0.0693124	1.0893	0.693922	432.012	4.55168	435.178	5.55597	451.948	25.0984	432.012	4.55168	95.5889
SY-A-Spot 120	80.3303	69532.5	0.961201	17.9897	1.9026	0.53261	2.06881	0.0695216	0.812461	0.392718	433.273	3.40448	433.54	7.30023	434.94	42.3737	433.273	3.40448	99.6168
SY-A-Spot 264	458.317	34697.9	2.70013	17.2517	1.05786	0.6202	1.61436	0.077634	1.21946	0.755384	481.985	5.66326	489.973	6.27477	527.514	23.2057	481.985	5.66326	91.369
SY-A-Spot 196	572.149	38793.9	2.0645	17.4774	0.969636	0.639598	1.47398	0.0811096	1.11014	0.75316	502.742	5.36906	502.057	5.83841	498.959	21.3568	502.742	5.36906	100.758
SY-A-Spot 194	72.8713	13290.5	0.625378	16.4117	1.55856	0.72401	1.90299	0.0862159	1.09192	0.57379	533.118	5.58702	553.032	8.11487	635.918	33.5635	533.118	5.58702	83.8345
SY-A-Spot 2	122.354	6340.43	2.12317	17.1199	1.0012	0.726243	1.47659	0.0902135	1.08531	0.735015	556.8	5.7894	554.346	6.30775	544.273	21.9026	556.8	5.7894	102.302
SY-A-Spot 175	274.177	604377	2.18897	16.927	0.836065	0.752097	1.29846	0.0923723	0.993476	0.765118	569.552	5.4156	569.44	5.65951	569.015	18.2026	569.552	5.4156	100.094
SY-A-Spot 93	211.407	21208.9	1.99903	16.9375	1.2357	0.759802	1.77229	0.0933764	1.27046	0.716845	575.475	6.99434	573.896	7.76981	567.669	26.905	575.475	6.99434	101.375
SY-A-Spot 257	180.729	18486.4	1.72382	16.7411	0.951775	0.770731	1.69545	0.0936211	1.4031	0.827566	576.917	7.74308	580.182	7.49331	593.006	20.6105	576.917	7.74308	97.287
SY-A-Spot 284	122.003	17718.8	0.83756	16.7752	1.07766	0.789745	1.63597	0.0961264	1.23087	0.75238	591.668	6.95845	591.027	7.33008	588.547	23.3575	591.668	6.95845	100.53
SY-A-Spot 230	110.823	77896.3	1.81364	16.2383	1.29242	0.851547	1.64103	0.100332	1.01126	0.616233	616.352	5.94423	625.498	7.66354	658.727	27.6974	616.352	5.94423	93.5673
SY-A-Spot 143	322.209	47392.7	2.28323	16.5747	0.904932	0.835521	1.27842	0.100483	0.903031	0.706363	617.236	5.31531	616.671	5.90891	614.574	19.5589	617.236	5.31531	100.433
SY-A-Spot 177	94.2821	6639.7	2.95487	16.3443	1.2982	0.886223	1.75126	0.105099	1.17541	0.671178	644.22	7.20615	644.338	8.35488	644.772	27.8993	644.22	7.20615	99.9144
SY-A-Spot 140	286.454	91511.8	3.97378	14.2186	1.13481	1.47468	1.70015	0.15214	1.26599	0.744632	912.949	10.7767	920.05	10.2875	937.098	23.2697	937.098	23.2697	97.423
SY-A-Spot 145	697.456	139725	3.32293	14.1996	0.688194	1.56072	1.36378	0.160802	1.17741	0.863341	961.23	10.5143	954.755	8.44013	939.883	14.106	939.883	14.106	102.271
SY-A-Spot 156	233.132	49312.2	4.2695	14.178	0.834471	1.51888	1.36952	0.156252	1.08593	0.792928	935.914	9.46006	938.023	8.38541	942.999	17.115	942.999	17.115	99.2487
SY-A-Spot 210	235.284	51652.6	2.31945	14.147	0.846697	1.57676	1.47631	0.161852	1.20938	0.819189	967.061	10.8604	961.093	9.17298	947.464	17.324	947.464	17.324	102.068
SY-A-Spot 74	65.7442	22641.1	1.01585	14.025	1.21433	1.57106	1.51899	0.159876	0.91255	0.60076	956.086	8.1086	958.845	9.42494	965.176	24.8062	965.176	24.8062	99.0582
SY-A-Spot 278	99.6818	44242.7	5.64503	13.9134	0.82444	1.60036	1.46791	0.161562	1.21451	0.827379	965.449	10.8897	970.35	9.17326	981.483	16.7856	981.483	16.7856	98.3663
SY-A-Spot 254	109.65	71716.2	3.97826	13.8781	1.07746	1.70447	1.54032	0.171636	1.10076	0.714628	1021.12	10.395	1010.21	9.85741	986.645	21.9103	986.645	21.9103	103.494
SY-A-Spot 71	137.871	59459.1	0.699147	13.8705	0.960527	1.68311	1.57111	0.169392	1.2433	0.791347	1008.76	11.6098	1002.16	10.0075	987.735	19.525	987.735	19.525	102.129
SY-A-Spot 42	100.211	153872	1.31887	13.8002	1.34914	1.62016	1.81144	0.16223	1.20877	0.667299	969.158	10.8768	978.051	11.3737	998.055	27.3895	998.055	27.3895	97.1046
SY-A-Spot 118	159.468	84227.6	2.0312	13.7834	0.796121	1.65177	1.32209	0.165194	1.05552	0.79837	985.576	9.64673	990.229	8.36209	1000.54	16.1666	1000.54	16.1666	98.5048
SY-A-Spot 72	142.588	16543.1	4.56224	13.7777	0.844142	1.73874	1.67402	0.173821	1.4456	0.863551	1033.13	13.7996	1023	10.7917	1001.37	17.1397	1001.37	17.1397	103.171
SY-A-Spot 25	185.323	4.60476e+06	4.37561	13.7594	0.882703	1.73075	1.41553	0.172792	1.1066	0.781757	1027.48	10.5103	1020.03	9.10992	1004.07	17.9158	1004.07	17.9158	102.331
SY-A-Spot 84	176.251	59459.2	4.17495	13.7449	1.00434	1.71356	1.67077	0.170895	1.3352	0.799154	1017.04	12.5625	1013.62	10.7133	1006.21	20.3776	1006.21	20.3776	101.076
SY-A-Spot 107	222.403	51074	3.12563	13.743	0.977232	1.72833	1.51817	0.172344	1.16183	0.765285	1025.01	11.0104	1019.13	9.76548	1006.5	19.8267	1006.5	19.8267	101.839
SY-A-Spot 1	319.697	631842	5.47032	13.7361	0.830299	1.65984	1.39303	0.165431	1.11854	0.802957	986.889	10.2354	993.314	8.82698	1007.51	16.8428	1007.51	16.8428	97.9535
SY-A-Spot 213	101.614	75455.3	4.53034	13.7291	1.1573	1.73594	1.55908	0.172928	1.0447	0.670076	1028.22	9.92899	1021.96	10.0448	1008.55	23.4677	1008.55	23.4677	101.951
SY-A-Spot 313	108.782	25427.9	3.29676	13.7206	0.943308	1.76244	1.55002	0.175459	1.22993	0.793494	1042.12	11.835	1031.75	10.0416	1009.81	19.1138	1009.81	19.1138	103.199
SY-A-Spot 56	184.417	63389.9	2.78717	13.6902	0.825224	1.69669	1.43092	0.168539	1.16899	0.816949	1004.06	10.8689	1007.29	9.14172	1014.3	16.7226	1014.3	16.7226	98.9905
SY-A-Spot 222	281.643	63385.9	5.50508	13.69	0.775657	1.77157	1.27377	0.175974	1.01037	0.793212	1044.94	9.74651	1035.09	8.26727	1014.33	15.7191	1014.33	15.7191	103.018
SY-A-Spot 67	317.333	265243	5.37611	13.6867	0.822315	1.72854	1.47046	0.171659	1.21904	0.829018	1021.25	11.5134	1019.21	9.45902	1014.82	16.663	1014.82	16.663	100.634
SY-A-Spot 157	91.3269	139731	1.03009	13.6797	1.1161	1.63284	1.59078	0.162073	1.13353	0.712563	968.285	10.1913	982.956	10.0178	1015.85	22.6007	1015.85	22.6007	95.3177
SY-A-Spot 302	129.207	131162	4.23089	13.647	0.880819	1.75541	1.4743	0.173821	1.18225	0.801907	1033.13	11.2857	1029.16	9.53721	1020.71	17.8316	1020.71	17.8316	101.217
SY-A-Spot 289	293.56	210591	3.91439	13.6303	1.01724	1.76292	1.60514	0.174352	1.24165	0.773547	1036.04	11.8836	1031.92	10.3997	1023.18	20.606	1023.18	20.606	101.257
SY-A-Spot 178	249.578	72707.9	3.75933	13.6217	0.961479	1.738	1.34549	0.171778	0.941219	0.699538	1021.9	8.89473	1022.72	8.67234	1024.45	19.4739	1024.45	19.4739	99.751
SY-A-Spot 77	28.3845	6130.62	0.847156	13.6171	1.79424	1.65605	2.25764	0.163623	1.37028	0.60695	976.88	12.4211	991.866	14.2939	1025.14	36.3017	1025.14	36.3017	95.292
SY-A-Spot 89	59.3819	323593	2.17908	13.615	1.15946	1.73805	1.58027	0.171699	1.07373	0.679461	1021.47	10.143	1022.74	10.1858	1025.45	23.4748	1025.45	23.4748	99.6115
SY-A-Spot 133	724.243	93019.7	6.10809	13.5655	0.720798	1.78086	1.35529	0.175288	1.14772	0.846845	1041.18	11.0348	1038.49	8.81302	1032.82	14.5846	1032.82	14.5846	100.809
SY-A-Spot 211	67.7569	31786.8	2.00528	13.563	1.06758	1.71771	1.73706	0.169041	1.37028	0.788849	1006.83	12.7729	1015.17	11.1483	1033.19	21.5911	1033.19	21.5911	97.4488
SY-A-Spot 60	78.7868	11390.4	2.18285	13.5432	1.35188	1.84135	1.63379	0.180944	0.917436	0.561538	1072.13	9.06168	1060.34	10.7511	1036.14	27.3241	1036.14	27.3241	103.473
SY-A-Spot 231	218.486	86880.9	3.39212	13.501	0.741334	1.71687	1.31635	0.168186	1.08775	0.826338	1002.11	10.0955	1014.85	8.44655	1042.43	14.9783	1042.43	14.9783	96.1318
SY-A-Spot 201	450.772	822288	37.44	13.4795	0.980675	1.76516	1.52336	0.172641	1.16572	0.765229	1026.65	11.0634	1032.74	9.87436	1045.7	19.7979	1045.7	19.7979	98.1782
SY-A-Spot 239	118.192	48466	3.60017	13.478	1.00853	1.74565	1.68699	0.170715	1.35233	0.801624	1016.05	12.7122	1025.55	10.8911	1045.91	20.3582	1045.91	20.3582	97.1444
SY-A-Spot 224	24.2677	18127.5	1.46786	13.4641	1.3106	1.78607	1.73161	0.174486	1.13172	0.653566	1036.78	10.8385	1040.39	11.272	1048	26.4432	1048	26.4432	98.9293
SY-A-Spot 129	161.268	86198.5	4.35882	13.4559	0.994918	1.75776	1.69271	0.171617	1.36946	0.809031	1021.01	12.9313	1030.02	10.9555	1049.23	20.0752	1049.23	20.0752	97.3109
SY-A-Spot 165	71.5199	135136	3.23746	13.4504	0.751136	1.7619	1.56436	0.171951	1.37223	0.877184	1022.85	12.979	1031.55	10.1334	1050.05	15.1583	1050.05	15.1583	97.4103
SY-A-Spot 43	63.9726	60867.5	2.33676	13.4499	1.06944	1.83352	1.69182	0.178935	1.31093	0.774864	1061.15	12.8263	1057.54	11.1163	1050.12	21.5742	1050.12	21.5742	101.05
SY-A-Spot 7	132.289	107168	2.69236	13.4476	0.8923	1.79828	1.3994	0.175465	1.07802	0.770342	1042.15	10.3735	1044.84	9.13167	1050.47	18.0028	1050.47	18.0028	99.2076
SY-A-Spot 212	106.714	29740.8	8.60253	13.3924	0.970491	1.77939	1.52837	0.172909	1.1807	0.772524	1028.12	11.2205	1037.96	9.93559	1058.75	19.5539	1058.75	19.5539	97.1063
SY-A-Spot 98	54.8492	15522.8	2.37568	13.3691	1.23382	1.9038	1.84098	0.184676	1.36635	0.742184	1092.47	13.7307	1082.42	12.2562	1062.26	24.8298	1062.26	24.8298	102.844
SY-A-Spot 136	125.54	54271.7	1.13362	13.356	1.03599	1.84626	1.51979	0.178919	1.11197	0.73166	1061.07	10.8788	1062.1	10.0102	1064.23	20.8171	1064.23	20.8171	99.7026
SY-A-Spot 108	89.8441	15113.9	3.43541	13.3459	0.91325	1.87471	1.66106	0.181539	1.38748	0.835296	1075.38	13.7425	1072.2	10.9995	1065.75	18.3465	1065.75	18.3465	100.903
SY-A-Spot 259	49.6879	13265.8	2.6671	13.3431	1.58221	1.94137	2.08532	0.187956	1.35837	0.651396	1110.29	13.8545	1095.47	13.9762	1066.17	31.8228	1066.17	31.8228	104.139
SY-A-Spot 208	174.578	72530.1	2.4942	13.3331	1.03639	1.81587	1.68822	0.175672	1.33266	0.789387	1043.29	12.8367	1051.2	11.0547	1067.68	20.8139	1067.68	20.8139	97.715
SY-A-Spot 10	72.7958	39249.5	2.22885	13.3003	1.23746	1.87885	1.71116	0.181318	1.18185	0.690673	1074.17	11.6938	1073.66	11.34	1072.64	24.8383	1072.64	24.8383	100.143
SY-A-Spot 276	116.867	122547	2.729	13.2756	1.0004	1.95838	1.49456	0.188643	1.11037	0.742938	1114.02	11.3599	1101.33	10.0462	1076.36	20.0756	1076.36	20.0756	103.499
SY-A-Spot 253	59.8179	35602.5	2.0295	13.2714	1.0517	1.87347	1.42486	0.180405	0.961321	0.674679	1069.19	9.4712	1071.76	9.43309	1076.99	21.1119	1076.99	21.1119	99.2754
SY-A-Spot 241	173.629	60845.3	3.15442	13.2462	0.873164	1.82174	1.38397	0.175091	1.07375	0.775853	1040.1	10.3137	1053.31	9.07269	1080.77	17.4986	1080.77	17.4986	96.2366
SY-A-Spot 41	106.89	863335	3.24447	13.2451	1.23994	1.79131	1.72511	0.172153	1.1994	0.69526	1023.96	11.3557	1042.3	11.2416	1080.93	24.8578	1080.93	24.8578	94.7295
SY-A-Spot 287	59.9322	31943.3	2.05874	13.2312	1.08615	1.90497	1.62344	0.182884	1.20658	0.743224	1082.71	12.0256	1082.83	10.8101	1083.06	21.7668	1083.06	21.7668	99.9674
SY-A-Spot 218	497.289	3.63311e+06	0.444895	13.2082	0.817671	1.88882	1.31889	0.181019	1.03484	0.784627	1072.54	10.2249	1077.17	8.75629	1086.57	16.3902	1086.57	16.3902	98.7085
SY-A-Spot 27	25.2266	31567.8	2.09994	13.1819	1.30372	1.8231	1.7139	0.174373	1.11255	0.649131	1036.16	10.649	1053.8	11.2387	1090.53	26.1182	1090.53	26.1182	95.0145
SY-A-Spot 95	109.989	41876.5	2.42308	13.1792	1.00704	1.91224	1.37843	0.18286	0.941252	0.682841	1082.58	9.38014	1085.37	9.19058	1090.94	20.1551	1090.94	20.1551	99.2333
SY-A-Spot 304	44.427	10088.1	2.87817	13.1663	1.41603	1.99602	1.97535	0.190685	1.37726	0.697226	1125.08	14.2186	1114.16	13.3634	1092.94	28.3396	1092.94	28.3396	102.941
SY-A-Spot 26	214.149	64446.4	3.47551	13.114	0.690968	1.90512	1.41137	0.181277	1.23066	0.871962	1073.95	12.1744	1082.88	9.3981	1100.87	13.841	1100.87	13.841	97.5541
SY-A-Spot 268	19.893	283178	1.13744	13.1119	1.85722	1.94486	2.27604	0.18503	1.31571	0.578069	1094.39	13.2432	1096.68	15.2639	1101.22	37.144	1101.22	37.144	99.3799
SY-A-Spot 24	566.351	62855.9	4.77877	13.089	0.823547	1.89188	1.38411	0.179675	1.11244	0.803724	1065.2	10.9225	1078.24	9.19444	1104.7	16.4728	1104.7	16.4728	96.4245
SY-A-Spot 180	115.219	61316.7	2.10012	13.0736	1.08012	1.98191	1.61156	0.188004	1.19602	0.742152	1110.56	12.2014	1109.37	10.8764	1107.03	21.5861	1107.03	21.5861	100.318
SY-A-Spot 279	506.007	266076	3.77537	13.0393	0.561288	2.0136	1.15385	0.190509	1.00813	0.87371	1124.13	10.3997	1120.11	7.82846	1112.28	11.2115	1112.28	11.2115	101.066
SY-A-Spot 303	93.3748	255295	2.2122	13.0337	0.969334	1.95559	1.62903	0.184941	1.30925	0.803699	1093.91	13.1728	1100.37	10.9449	1113.14	19.348	1113.14	19.348	98.2722
SY-A-Spot 52	258.34	2.48846e+06	2.77337	12.9948	0.875803	1.99626	1.41867	0.188224	1.11606	0.786695	1111.75	11.3968	1114.25	9.59757	1119.15	17.4813	1119.15	17.4813	99.3388
SY-A-Spot 5	53.6863	56946	3.26352	12.9856	1.26432	1.97072	1.63959	0.185685	1.0439	0.636685	1097.96	10.5386	1105.55	11.0445	1120.54	25.199	1120.54	25.199	97.9847
SY-A-Spot 116	113.004	69247.1	3.10787	12.9224	0.956836	1.98849	1.51253	0.186446	1.17141	0.774474	1102.09	11.8668	1111.61	10.2193	1130.25	19.0558	1130.25	19.0558	97.5086
SY-A-Spot 58	89.7357	28299.2	3.50887	12.905	0.935399	2.12575	1.42672	0.199048	1.07729	0.755083	1170.21	11.5285	1157.21	9.85236	1132.93	18.6041	1132.93	18.6041	103.29
SY-A-Spot 193	31.2798	19034.4	0.752978	12.8756	1.42024	1.94608	2.1508	0.18181	1.6152	0.750974	1076.86	16.0183	1097.1	14.427	1137.48	28.2567	1137.48	28.2567	94.6703
SY-A-Spot 235	158.633	122530	2.07355	12.864	1.05914	1.99147	1.52202	0.185882	1.09306	0.71816	1099.03	11.0448	1112.62	10.2886	1139.3	21.0475	1139.3	21.0475	96.4653
SY-A-Spot 229	38.9789	65769.7	2.41317	12.846	1.27857	2.02347	1.80674	0.188605	1.27655	0.706547	1113.81	13.0579	1123.43	12.2783	1142.04	25.4013	1142.04	25.4013	97.5283
SY-A-Spot 207	181.939	128724	2.76335	12.8369	0.77947	2.04223	1.34402	0.190218	1.0949	0.814648	1122.56	11.2802	1129.71	9.16134	1143.49	15.4942	1143.49	15.4942	98.1691
SY-A-Spot 78	366.253	77083.6	2.72138	12.8017	0.774152	2.08436	1.3543	0.19361	1.11123	0.820516	1140.9	11.6195	1143.67	9.2932	1148.95	15.3568	1148.95	15.3568	99.2993
SY-A-Spot 309	55.6936	9343.25	1.36392	12.7563	1.03445	2.11419	1.53503	0.195685	1.13412	0.738824	1152.1	11.9651	1153.44	10.5818	1155.96	20.5245	1155.96	20.5245	99.6662
SY-A-Spot 299	228.314	117766	2.14269	12.6999	0.90438	2.19449	1.20006	0.202219	0.788818	0.657317	1187.23	8.5533	1179.29	8.37093	1164.74	17.9389	1164.74	17.9389	101.931
SY-A-Spot 182	35.1547	28499.5	3.1284	12.6929	1.30797	2.10989	1.83488	0.194316	1.28685	0.701329	1144.71	13.497	1152.04	12.6408	1165.84	25.9308	1165.84	25.9308	98.188
SY-A-Spot 160	142.232	16757.4	3.12866	12.6778	1.00398	2.08717	1.55407	0.191995	1.18623	0.763306	1132.17	12.3169	1144.6	10.6687	1168.23	19.8718	1168.23	19.8718	96.9131
SY-A-Spot 127	134.598	65677.5	3.81417	12.662	0.874999	2.15669	1.36771	0.198143	1.05119	0.768579	1165.34	11.2065	1167.21	9.4884	1170.7	17.3343	1170.7	17.3343	99.5415
SY-A-Spot 209	62.1529	18252.2	3.15058	12.6434	1.18087	2.09401	1.82676	0.192102	1.39377	0.762974	1132.75	14.4787	1146.84	12.5543	1173.61	23.3767	1173.61	23.3767	96.5184
SY-A-Spot 275	44.6306	26617.6	2.70114	12.5588	1.22243	2.13046	1.77971	0.194138	1.29346	0.72678	1143.75	13.5559	1158.74	12.2989	1186.88	24.1538	1186.88	24.1538	96.3662
SY-A-Spot 183	44.1692	285678	1.22809	12.4579	1.05388	2.11899	1.88489	0.191541	1.56273	0.829085	1129.72	16.1941	1155.01	13.0033	1202.76	20.749	1202.76	20.749	93.9269
SY-A-Spot 32	863.923	661864	2.49442	12.3975	0.844768	2.37334	1.42545	0.213492	1.14816	0.805474	1247.4	13.0217	1234.61	10.1835	1212.33	16.6308	1212.33	16.6308	102.892
SY-A-Spot 242	89.5966	44686.8	2.39004	12.3047	1.0361	1.92677	1.73591	0.172023	1.39279	0.802342	1023.25	13.1782	1090.42	11.6042	1227.14	20.343	1227.14	20.343	83.3849
SY-A-Spot 223	176.64	107829	2.00267	12.2369	0.750511	2.37805	1.4026	0.211145	1.18492	0.844799	1234.91	13.3166	1236.02	10.0261	1237.96	14.733	1237.96	14.733	99.7543
SY-A-Spot 36	122.78	36582.1	1.69532	12.1485	0.904505	2.46837	1.95048	0.217582	1.72807	0.885974	1269.08	19.907	1262.82	14.0956	1252.14	17.699	1252.14	17.699	101.353
SY-A-Spot 310	1231.58	387236	3.05831	12.119	0.68408	2.49955	1.73145	0.219793	1.59058	0.918642	1280.78	18.4758	1271.9	12.5577	1256.93	13.3758	1256.93	13.3758	101.898
SY-A-Spot 81	206.308	25599.8	8.04222	12.0588	1.06233	2.23343	1.64	0.195417	1.24941	0.76184	1150.66	13.1665	1191.59	11.5027	1266.67	20.7343	1266.67	20.7343	90.8412
SY-A-Spot 199	210.59	69361.7	1.5378	11.9525	0.881472	2.46914	1.47874	0.214137	1.18729	0.802912	1250.82	13.499	1263.04	10.6871	1283.9	17.1578	1283.9	17.1578	97.4236
SY-A-Spot 311	89.3955	54893.8	2.4994	11.8746	1.06444	2.62383	1.5308	0.22607	1.10013	0.718668	1313.87	13.0765	1307.34	11.2547	1296.62	20.6963	1296.62	20.6963	101.331
SY-A-Spot 233	115.655	124745	2.05406	11.796	0.739846	2.56289	1.35524	0.219358	1.13548	0.837841	1278.48	13.168	1290.12	9.89893	1309.52	14.3585	1309.52	14.3585	97.6293
SY-A-Spot 90	250.222	1.2494e+06	1.91947	11.7594	0.813745	2.68582	1.21058	0.229165	0.89628	0.740373	1330.12	10.7721	1324.56	8.95729	1315.56	15.78	1315.56	15.78	101.107
SY-A-Spot 82	79.4361	63904.8	2.62143	11.7546	0.894327	2.6407	1.37579	0.225225	1.04545	0.759894	1309.42	12.3886	1312.05	10.1328	1316.34	17.3404	1316.34	17.3404	99.4745
SY-A-Spot 291	239.622	38032.4	3.61624	11.7503	0.99097	2.57587	1.75783	0.219614	1.45188	0.825948	1279.84	16.8534	1293.81	12.858	1317.06	19.2118	1317.06	19.2118	97.1739
SY-A-Spot 68	91.2334	11198.3	2.95113	11.6421	3.42048	2.21825	3.69785	0.187382	1.40514	0.379989	1107.18	14.2948	1186.82	25.8859	1334.97	66.1572	1334.97	66.1572	82.9364
SY-A-Spot 186	801.546	428586	2.20932	11.639	0.812296	2.70267	1.26651	0.228242	0.971706	0.767234	1325.28	11.6403	1329.19	9.38702	1335.48	15.7076	1335.48	15.7076	99.2363
SY-A-Spot 15	390.569	83801.3	3.70458	11.5933	0.901346	2.59944	1.32159	0.218663	0.966534	0.731339	1274.81	11.1796	1300.48	9.69139	1343.08	17.41	1343.08	17.41	94.917
SY-A-Spot 245	306.961	67981.6	3.08353	11.5688	0.950604	2.70465	1.53476	0.227032	1.20492	0.785088	1318.92	14.3717	1329.73	11.3776	1347.17	18.3527	1347.17	18.3527	97.9033
SY-A-Spot 62	193.725	69572.8	2.82731	11.5051	0.798542	2.80702	1.60396	0.234329	1.39105	0.86726	1357.15	17.0238	1357.41	12.0089	1357.81	15.3936	1357.81	15.3936	99.951
SY-A-Spot 29	23.8988	5593.79	3.83467	11.4945	1.88574	2.90703	2.23898	0.242453	1.20708	0.539118	1399.44	15.1846	1383.74	16.917	1359.59	36.3459	1359.59	36.3459	102.931
SY-A-Spot 286	67.0728	33479.1	3.7804	11.4751	0.867477	2.83886	1.32505	0.236367	1.00162	0.75591	1367.78	12.3441	1365.87	9.94987	1362.86	16.7109	1362.86	16.7109	100.361
SY-A-Spot 148	85.5187	78944.6	3.07776	11.3782	1.0357	3.01253	1.9883	0.24871	1.69725	0.85362	1431.82	21.792	1410.8	15.1585	1379.17	19.9069	1379.17	19.9069	103.817
SY-A-Spot 86	272.357	132500	4.75659	11.3196	0.781221	2.72748	1.44564	0.224018	1.21638	0.84141	1303.07	14.351	1335.97	10.7412	1389.08	14.9942	1389.08	14.9942	93.8081
SY-A-Spot 191	69.3971	55197.8	4.01412	11.3055	1.03895	2.78066	1.57023	0.2281	1.17738	0.749811	1324.53	14.097	1350.36	11.7272	1391.47	19.9345	1391.47	19.9345	95.1893
SY-A-Spot 174	285.122	384765	3.181	11.2939	0.998372	2.67264	1.66472	0.219014	1.33212	0.800206	1276.66	15.4285	1320.92	12.3014	1393.45	19.1508	1393.45	19.1508	91.6189
SY-A-Spot 252	49.9998	60800.1	3.66012	11.2477	1.08134	2.86371	1.63519	0.233711	1.2266	0.750127	1353.92	14.9792	1372.42	12.3068	1401.31	20.7202	1401.31	20.7202	96.6179
SY-A-Spot 125	100.518	95318.1	3.1913	11.2084	0.890507	2.8165	1.50841	0.229055	1.2175	0.80714	1329.54	14.6271	1359.94	11.3035	1408.02	17.0478	1408.02	17.0478	94.4268
SY-A-Spot 262	580.379	125576	11.9389	11.1609	0.779545	2.94166	1.38392	0.23822	1.14348	0.826262	1377.44	14.1817	1392.7	10.4875	1416.14	14.907	1416.14	14.907	97.267
SY-A-Spot 63	332.667	155156	1.40465	11.1365	0.872988	3.0428	1.47695	0.245872	1.19133	0.806615	1417.15	15.156	1418.43	11.2876	1420.32	16.6845	1420.32	16.6845	99.7765
SY-A-Spot 159	61.0204	70351.6	1.15108	11.0552	1.12827	3.13675	1.49896	0.251613	0.986848	0.658357	1446.79	12.7888	1441.75	11.5414	1434.32	21.5229	1434.32	21.5229	100.869
SY-A-Spot 214	212.519	111987	2.32114	11.0453	0.981981	3.12332	1.5306	0.250312	1.17407	0.767067	1440.08	15.1522	1438.45	11.7728	1436.02	18.7278	1436.02	18.7278	100.283
SY-A-Spot 240	164.251	73754.8	2.20134	11.0265	0.979502	3.02002	1.49145	0.241621	1.12472	0.754113	1395.12	14.1094	1412.69	11.3773	1439.27	18.6723	1439.27	18.6723	96.9325
SY-A-Spot 220	134.698	152674	3.17289	11.0238	0.793207	3.18055	1.31566	0.254402	1.04965	0.797818	1461.14	13.723	1452.45	10.1638	1439.74	15.1198	1439.74	15.1198	101.487
SY-A-Spot 31	157.571	79132	3.5856	11.0232	0.645881	3.18168	1.3194	0.25448	1.1505	0.871988	1461.54	15.0451	1452.72	10.1936	1439.83	12.3114	1439.83	12.3114	101.508
SY-A-Spot 130	277.061	134524	2.54105	10.9986	0.974562	3.11611	1.51297	0.248677	1.15728	0.764909	1431.65	14.8574	1436.67	11.6307	1444.1	18.566	1444.1	18.566	99.1377
SY-A-Spot 244	245.763	238089	3.09316	10.9972	0.946551	2.8848	2.14539	0.230189	1.92529	0.897408	1335.49	23.2236	1377.95	16.1778	1444.34	18.0318	1444.34	18.0318	92.4636
SY-A-Spot 170	229.978	97526.7	2.75325	10.9956	0.961831	3.00542	2.38709	0.23978	2.18474	0.915231	1385.55	27.2388	1408.99	18.1887	1444.61	18.3222	1444.61	18.3222	95.9121
SY-A-Spot 181	258.425	805367	1.59195	10.9662	0.825597	3.17538	1.24164	0.252662	0.927396	0.746911	1452.19	12.0584	1451.19	9.58824	1449.71	15.7161	1449.71	15.7161	100.171
SY-A-Spot 37	246.942	145115	3.60774	10.9502	1.01766	3.17214	1.7327	0.252036	1.40237	0.809353	1448.97	18.1982	1450.4	13.3774	1452.49	19.365	1452.49	19.365	99.7574
SY-A-Spot 167	270.194	67225.1	1.22016	10.9327	0.773094	3.1338	1.41835	0.248592	1.18913	0.838392	1431.21	15.2621	1441.03	10.9182	1455.53	14.7051	1455.53	14.7051	98.329
SY-A-Spot 18	229.878	142571	0.966955	10.9167	0.891803	3.08134	1.5691	0.244073	1.29104	0.822785	1407.83	16.3279	1428.06	12.0293	1458.32	16.9568	1458.32	16.9568	96.5381
SY-A-Spot 70	215.64	160347	2.30323	10.8959	0.925564	3.25215	1.43168	0.25711	1.09226	0.762924	1475.04	14.401	1469.69	11.1187	1461.95	17.5901	1461.95	17.5901	100.895
SY-A-Spot 292	213.215	46435.4	3.03766	10.8645	0.657876	3.19455	1.3612	0.251829	1.19166	0.875451	1447.9	15.4537	1455.84	10.5267	1467.43	12.4934	1467.43	12.4934	98.6689
SY-A-Spot 270	190.761	113529	1.54667	10.8001	0.867479	3.06208	1.46105	0.239956	1.17565	0.80466	1386.47	14.6663	1423.26	11.1836	1478.71	16.4491	1478.71	16.4491	93.7616
SY-A-Spot 61	50.4728	12175.6	2.40607	10.7591	1.01226	3.25232	1.70433	0.253897	1.37116	0.804515	1458.54	17.8979	1469.73	13.2366	1485.91	19.176	1485.91	19.176	98.1579
SY-A-Spot 20	565.862	12265.7	1.01463	10.7566	1.12751	2.85802	1.56055	0.223063	1.0789	0.691362	1298.04	12.6847	1370.92	11.7389	1486.36	21.3582	1486.36	21.3582	87.3305
SY-A-Spot 99	178.598	175488	4.54241	10.7384	0.918399	3.33033	1.46821	0.259487	1.1455	0.780204	1487.22	15.2138	1488.19	11.4657	1489.56	17.3895	1489.56	17.3895	99.8429
SY-A-Spot 263	419.953	71726.5	2.89934	10.7379	0.855872	3.09758	1.33917	0.24134	1.02997	0.769116	1393.66	12.9087	1432.09	10.2795	1489.66	16.2053	1489.66	16.2053	93.5557
SY-A-Spot 248	403.14	83755.8	3.97767	10.7297	0.62369	3.22805	1.21748	0.251314	1.04559	0.858818	1445.25	13.5373	1463.92	9.4385	1491.1	11.8067	1491.1	11.8067	96.9252
SY-A-Spot 138	168.358	73300.8	3.4222	10.6935	0.894806	3.42714	1.35509	0.265913	1.01763	0.750974	1520.02	13.7799	1510.64	10.6518	1497.49	16.9248	1497.49	16.9248	101.505
SY-A-Spot 147	550.51	272566	8.11109	10.6883	0.808094	3.27017	1.42233	0.253612	1.17047	0.822925	1457.07	15.2646	1473.99	11.0604	1498.4	15.2827	1498.4	15.2827	97.2417
SY-A-Spot 249	157.374	78263.9	2.03055	10.6706	0.871243	3.40224	1.27229	0.263417	0.92718	0.728748	1507.3	12.4618	1504.91	9.9844	1501.54	16.4702	1501.54	16.4702	100.383
SY-A-Spot 261	91.7139	41815.3	1.60827	10.6593	0.872144	3.17566	1.27389	0.245612	0.928527	0.728891	1415.81	11.8027	1451.26	9.83749	1503.55	16.4828	1503.55	16.4828	94.1644
SY-A-Spot 151	111.115	64411	2.47777	10.609	1.08574	2.9974	1.73821	0.230732	1.3574	0.78092	1338.33	16.4049	1406.96	13.235	1512.48	20.4939	1512.48	20.4939	88.4861
SY-A-Spot 228	315.594	104133	1.87446	10.6005	0.706237	3.36762	1.24929	0.259022	1.03052	0.824879	1484.84	13.6671	1496.9	9.78106	1514	13.3271	1514	13.3271	98.0739
SY-A-Spot 154	220.164	170762	3.56603	10.5976	0.685987	3.35392	1.36166	0.257898	1.17624	0.863827	1479.08	15.5459	1493.71	10.6509	1514.51	12.9441	1514.51	12.9441	97.6608
SY-A-Spot 197	59.5278	120025	2.67172	10.595	1.03692	3.38398	1.59227	0.260147	1.20836	0.758889	1490.59	16.081	1500.69	12.4804	1514.97	19.5658	1514.97	19.5658	98.3909
SY-A-Spot 215	131.935	86692.7	2.25554	10.5733	0.956279	3.34284	1.73065	0.256456	1.44246	0.833477	1471.69	18.9797	1491.12	13.5272	1518.85	18.0347	1518.85	18.0347	96.8949
SY-A-Spot 35	265.162	368765	2.58305	10.5557	0.947037	3.3795	1.60601	0.258837	1.29707	0.807636	1483.89	17.1926	1499.66	12.5843	1521.99	17.8529	1521.99	17.8529	97.4965
SY-A-Spot 75	183.698	52257.3	3.82081	10.5218	0.772206	3.44037	1.48882	0.262653	1.27291	0.854975	1503.4	17.0693	1513.67	11.7133	1528.04	14.5451	1528.04	14.5451	98.3876
SY-A-Spot 109	178.466	65389.6	2.43254	10.5131	0.742925	3.37881	1.49761	0.25774	1.30035	0.868281	1478.27	17.1779	1499.49	11.7343	1529.6	13.9906	1529.6	13.9906	96.6443
SY-A-Spot 8	505.871	53403.3	4.30594	10.446	0.951135	3.22649	1.33121	0.244551	0.931383	0.699649	1410.31	11.7979	1463.54	10.3191	1541.65	17.8852	1541.65	17.8852	91.481
SY-A-Spot 184	45.1362	10847.2	14.7588	10.2809	1.1477	3.66212	1.5841	0.273182	1.09186	0.689264	1556.93	15.1025	1563.15	12.6353	1571.55	21.4954	1571.55	21.4954	99.0703
SY-A-Spot 101	136.019	176222	1.32165	10.2393	0.816407	3.63734	1.13019	0.270234	0.781545	0.691515	1541.99	10.7184	1557.74	9.00136	1579.14	15.2747	1579.14	15.2747	97.6473
SY-A-Spot 269	300.908	1.91355e+06	5.13977	10.0921	0.961504	3.78501	1.50385	0.277165	1.15632	0.768906	1577.07	16.1766	1589.57	12.0792	1606.18	17.9266	1606.18	17.9266	98.1877
SY-A-Spot 260	252.212	41779.9	2.51594	10.0655	1.05741	3.88016	1.71019	0.283382	1.34411	0.785944	1608.37	19.1325	1609.56	13.8075	1611.1	19.7024	1611.1	19.7024	99.8307
SY-A-Spot 176	395.212	106149	4.58728	10.041	0.862615	3.87155	1.54076	0.282065	1.27665	0.828585	1601.75	18.1063	1607.77	12.4338	1615.65	16.063	1615.65	16.063	99.1402
SY-A-Spot 4	342	206162	2.29952	10.0031	0.795507	3.90518	1.5792	0.283442	1.3642	0.863855	1608.67	19.4217	1614.75	12.7666	1622.67	14.7997	1622.67	14.7997	99.1373
SY-A-Spot 226	123.174	46700.1	1.66914	9.98879	0.826682	3.93877	1.33565	0.285471	1.04907	0.78544	1618.85	15.0184	1621.69	10.8163	1625.34	15.3745	1625.34	15.3745	99.6008
SY-A-Spot 79	55.2635	46797.4	1.69568	9.98636	0.986262	3.93086	1.4907	0.284828	1.1178	0.74985	1615.63	15.9743	1620.06	12.0672	1625.79	18.3417	1625.79	18.3417	99.3748
SY-A-Spot 80	351.36	70248.6	1.62846	9.98519	0.926915	4.01262	1.51737	0.290718	1.20134	0.79173	1645.12	17.4432	1636.76	12.334	1626.01	17.2374	1626.01	17.2374	101.175
SY-A-Spot 144	115.276	58997.5	3.69127	9.96377	0.945137	3.94356	1.38025	0.285102	1.00589	0.728772	1617.01	14.3857	1622.67	11.1803	1630	17.5673	1630	17.5673	99.2026
SY-A-Spot 106	190.719	204621	1.69368	9.96027	0.745263	3.80696	1.36661	0.275129	1.14551	0.838216	1566.79	15.9331	1594.22	10.99	1630.66	13.8506	1630.66	13.8506	96.0831
SY-A-Spot 38	222.137	683806	5.52169	9.95552	0.86101	3.95905	1.57282	0.285985	1.31622	0.836852	1621.43	18.8693	1625.85	12.7504	1631.54	16.0002	1631.54	16.0002	99.3802
SY-A-Spot 146	249.374	138054	4.89025	9.94407	0.953469	3.99455	1.61059	0.288217	1.29804	0.805938	1632.61	18.7214	1633.09	13.0801	1633.68	17.7138	1633.68	17.7138	99.9346
SY-A-Spot 57	168.443	38922.3	5.62305	9.94137	1.00795	3.95403	1.53061	0.285216	1.15188	0.752559	1617.58	16.4787	1624.82	12.405	1634.19	18.7248	1634.19	18.7248	98.9838
SY-A-Spot 288	241.657	44491.8	2.17249	9.94009	0.804746	4.06287	1.42898	0.293029	1.18083	0.826347	1656.65	17.2508	1646.88	11.6442	1634.43	14.949	1634.43	14.949	101.36
SY-A-Spot 227	36.9215	28465.7	2.30641	9.93466	1.12908	4.00101	1.75619	0.28841	1.34514	0.76594	1633.58	19.4107	1634.4	14.2673	1635.44	20.972	1635.44	20.972	99.886
SY-A-Spot 105	195.387	71303.9	1.78287	9.93388	0.838759	3.79702	1.32748	0.273684	1.02893	0.775097	1559.48	14.2525	1592.12	10.6695	1635.59	15.5786	1635.59	15.5786	95.3466
SY-A-Spot 45	77.0151	219840	1.96636	9.92543	0.891056	4.02415	1.38542	0.289809	1.06085	0.765726	1640.57	15.366	1639.09	11.2678	1637.17	16.5467	1637.17	16.5467	100.208
SY-A-Spot 158	87.8123	141065	0.84956	9.91975	1.02545	3.88952	1.71389	0.279953	1.37327	0.801259	1591.13	19.3627	1611.51	13.8442	1638.23	19.0401	1638.23	19.0401	97.1246
SY-A-Spot 308	54.2715	71086.8	2.99566	9.90797	1.0535	3.96553	1.46208	0.285085	1.01382	0.693409	1616.92	14.4985	1627.17	11.8565	1640.44	19.5554	1640.44	19.5554	98.5664
SY-A-Spot 132	273.735	433585	1.86798	9.90709	0.853204	4.00781	1.35492	0.288098	1.05255	0.776833	1632.02	15.1759	1635.78	11.0109	1640.6	15.8383	1640.6	15.8383	99.4768
SY-A-Spot 76	78.2856	28046.7	1.44256	9.8984	1.117	4.03767	1.74219	0.28999	1.33698	0.767417	1641.48	19.375	1641.82	14.1793	1642.23	20.7312	1642.23	20.7312	99.9544
SY-A-Spot 12	86.8892	34299.2	2.21579	9.88816	0.784708	4.01123	1.35232	0.287794	1.10136	0.814426	1630.49	15.8666	1636.47	10.9916	1644.15	14.5601	1644.15	14.5601	99.1693
SY-A-Spot 73	101.486	180401	2.64661	9.88471	0.83095	4.07483	1.39371	0.292255	1.1189	0.802824	1652.79	16.3127	1649.28	11.3634	1644.8	15.4169	1644.8	15.4169	100.486
SY-A-Spot 134	300.114	131614	2.58129	9.88356	0.809047	3.9766	1.35521	0.285176	1.08722	0.80225	1617.38	15.552	1629.43	10.996	1645.02	15.0101	1645.02	15.0101	98.3199
SY-A-Spot 19	106.868	90360.5	3.17982	9.85954	0.700144	3.99416	1.25001	0.285739	1.03553	0.828418	1620.2	14.8354	1633.01	10.1513	1649.53	12.982	1649.53	12.982	98.2221
SY-A-Spot 64	138.164	59847.8	1.77835	9.85918	0.897244	4.04985	1.41883	0.289713	1.09911	0.774657	1640.09	15.916	1644.27	11.5542	1649.59	16.635	1649.59	16.635	99.4241
SY-A-Spot 283	185.726	53313.4	3.28465	9.85105	0.943444	3.97712	1.49181	0.284275	1.1556	0.77463	1612.86	16.4895	1629.54	12.1047	1651.12	17.4882	1651.12	17.4882	97.6823
SY-A-Spot 265	99.925	59566.8	1.67894	9.84926	0.794711	4.14572	1.31284	0.296272	1.04499	0.795971	1672.8	15.3966	1663.36	10.7402	1651.46	14.7302	1651.46	14.7302	101.292
SY-A-Spot 294	86.8274	39382.7	1.13341	9.84583	0.890315	4.03792	1.49396	0.288468	1.19969	0.803027	1633.87	17.3146	1641.87	12.159	1652.11	16.5012	1652.11	16.5012	98.8962
SY-A-Spot 282	37.2407	67903.8	1.32046	9.84399	1.07714	4.04323	1.67375	0.288794	1.28109	0.765405	1635.5	18.5057	1642.94	13.6259	1652.45	19.9635	1652.45	19.9635	98.9739
SY-A-Spot 104	255.639	126675	1.2157	9.84159	0.797265	3.94178	1.36358	0.281479	1.10622	0.81126	1598.81	15.6637	1622.3	11.0442	1652.91	14.7748	1652.91	14.7748	96.727
SY-A-Spot 94	331.841	165231	2.36809	9.83124	0.665247	4.05442	1.19835	0.289218	0.996743	0.831761	1637.62	14.4145	1645.19	9.7608	1654.86	12.3249	1654.86	12.3249	98.9584
SY-A-Spot 114	227.228	48169.1	1.9937	9.80901	0.79562	4.11468	1.31303	0.292852	1.04453	0.795509	1655.77	15.2524	1657.22	10.726	1659.05	14.7328	1659.05	14.7328	99.8022
SY-A-Spot 271	139.792	92139.8	1.6524	9.8042	0.907145	3.99451	1.52332	0.28416	1.22376	0.80335	1612.28	17.4565	1633.08	12.3712	1659.96	16.7963	1659.96	16.7963	97.1278
SY-A-Spot 49	230.977	54517.6	2.51912	9.80411	0.81353	4.07523	1.73238	0.2899	1.52948	0.882878	1641.03	22.1593	1649.36	14.1253	1659.97	15.0627	1659.97	15.0627	98.8588
SY-A-Spot 206	152.526	374623	1.99108	9.80208	0.897232	4.05699	1.52692	0.288543	1.2355	0.809146	1634.24	17.8351	1645.7	12.4389	1660.36	16.6119	1660.36	16.6119	98.4271
SY-A-Spot 295	535.402	210234	1.82864	9.79481	0.802951	3.93384	1.36194	0.279577	1.10006	0.807721	1589.23	15.4943	1620.67	11.0264	1661.73	14.8635	1661.73	14.8635	95.637
SY-A-Spot 11	510.048	223218	18.9686	9.79294	0.841721	3.88488	1.58909	0.276044	1.34785	0.848192	1571.41	18.7964	1610.55	12.8329	1662.08	15.5806	1662.08	15.5806	94.5445
SY-A-Spot 115	88.9251	63107.1	2.31509	9.77647	0.868229	4.11417	1.35171	0.291845	1.036	0.766437	1650.74	15.0876	1657.12	11.0417	1665.2	16.0649	1665.2	16.0649	99.1318
SY-A-Spot 150	101.792	25056	1.79491	9.77323	0.771557	4.0661	1.70869	0.288339	1.52457	0.892247	1633.23	21.9959	1647.53	13.926	1665.81	14.2748	1665.81	14.2748	98.0439
SY-A-Spot 124	133.452	42230.1	2.49594	9.76483	0.803461	3.99641	1.31385	0.283154	1.03954	0.791219	1607.23	14.7879	1633.47	10.6709	1667.4	14.8622	1667.4	14.8622	96.3913
SY-A-Spot 188	106.905	50293.5	1.1005	9.76238	0.767618	4.09345	1.30684	0.289956	1.05764	0.809309	1641.31	15.3255	1653	10.6646	1667.86	14.1982	1667.86	14.1982	98.408
SY-A-Spot 306	100.412	43195.7	1.01693	9.7565	0.958633	4.02439	1.48154	0.284893	1.12959	0.762446	1615.96	16.1457	1639.14	12.0498	1668.98	17.7294	1668.98	17.7294	96.8231
SY-A-Spot 65	301.436	285679	3.14503	9.74	0.940829	3.98044	1.60919	0.281305	1.3055	0.811277	1597.93	18.4765	1630.22	13.0594	1672.11	17.3931	1672.11	17.3931	95.5638
SY-A-Spot 69	170.046	71230.2	2.23176	9.73414	1.00347	4.27153	1.66335	0.301695	1.32657	0.797526	1699.71	19.8202	1687.89	13.6863	1673.22	18.5488	1673.22	18.5488	101.583
SY-A-Spot 117	295.202	113325	1.7679	9.71343	0.695556	4.11637	1.04679	0.290118	0.782287	0.74732	1642.12	11.3405	1657.56	8.5517	1677.16	12.8516	1677.16	12.8516	97.9108
SY-A-Spot 128	274.12	124289	1.72744	9.62798	0.728436	4.26081	1.26981	0.297656	1.04009	0.819094	1679.67	15.3796	1685.82	10.4429	1693.47	13.4296	1693.47	13.4296	99.1854
SY-A-Spot 173	60.3783	40905.8	1.77306	9.61185	0.982083	4.41424	1.59109	0.307858	1.25183	0.786776	1730.16	18.9957	1715.02	13.1725	1696.56	18.0996	1696.56	18.0996	101.98
SY-A-Spot 122	87.7931	18363.7	2.49827	9.59761	0.810308	3.7502	1.58621	0.26116	1.36362	0.859673	1495.77	18.2032	1582.16	12.7162	1699.29	14.9282	1699.29	14.9282	88.0233
SY-A-Spot 307	342.508	109867	2.19404	9.50266	0.698858	4.38658	1.30497	0.302454	1.10207	0.844513	1703.47	16.4977	1709.81	10.791	1717.58	12.8468	1717.58	12.8468	99.178
SY-A-Spot 219	568.472	213907	8.387	9.49423	0.897194	3.56446	1.54246	0.24555	1.25468	0.813428	1415.49	15.9452	1541.66	12.2312	1719.22	16.4878	1719.22	16.4878	82.3333
SY-A-Spot 274	166.191	98949.7	2.09503	9.47464	0.87183	4.42841	1.36661	0.304438	1.05239	0.770076	1713.28	15.8333	1717.67	11.3205	1723.01	16.0157	1723.01	16.0157	99.4351
SY-A-Spot 14	254.893	69152.3	1.6926	9.46471	0.728893	4.39869	1.34124	0.302078	1.12589	0.839443	1701.6	16.8383	1712.09	11.0966	1724.94	13.3866	1724.94	13.3866	98.6472
SY-A-Spot 290	452.12	86781.3	2.74514	9.43258	0.898078	4.36399	1.57358	0.298677	1.29214	0.821144	1684.74	19.1571	1705.55	12.9999	1731.18	16.4792	1731.18	16.4792	97.3177
SY-A-Spot 237	197.165	327540	6.21497	9.42445	0.852445	4.50829	1.49251	0.308287	1.22512	0.820845	1732.27	18.6101	1732.5	12.404	1732.76	15.6386	1732.76	15.6386	99.9717
SY-A-Spot 221	98.5725	111378	3.15828	9.41884	0.834114	4.2954	1.48847	0.293554	1.2328	0.828233	1659.27	18.035	1692.48	12.2601	1733.85	15.3002	1733.85	15.3002	95.6982
SY-A-Spot 126	179.143	31331.9	2.51392	9.38545	0.84824	4.44431	1.4203	0.302655	1.13918	0.802073	1704.46	17.0621	1720.64	11.7731	1740.37	15.5467	1740.37	15.5467	97.9369
SY-A-Spot 195	214.117	119659	2.58957	9.38327	0.878811	4.56064	1.62232	0.310505	1.36368	0.840573	1743.19	20.8287	1742.11	13.5112	1740.79	16.1062	1740.79	16.1062	100.138
SY-A-Spot 102	309.408	204039	5.49402	9.37883	0.792792	4.52466	1.37566	0.307909	1.12424	0.817238	1730.41	17.0617	1735.51	11.4403	1741.66	14.5279	1741.66	14.5279	99.354
SY-A-Spot 139	197.63	183422	2.96126	9.3743	0.908046	4.49495	1.46221	0.305739	1.14608	0.783803	1719.71	17.2993	1730.04	12.1456	1742.54	16.6385	1742.54	16.6385	98.6895
SY-A-Spot 190	454.72	169175	3.49813	9.36348	0.797868	4.51392	1.52415	0.306676	1.29863	0.852036	1724.33	19.648	1733.54	12.6699	1744.66	14.6155	1744.66	14.6155	98.8347
SY-A-Spot 203	221.887	493513	3.38862	9.32803	0.614401	4.58154	1.2094	0.310091	1.04171	0.861345	1741.15	15.8948	1745.91	10.0803	1751.6	11.2445	1751.6	11.2445	99.4033
SY-A-Spot 66	585.915	75850.4	4.43867	9.32779	0.85471	4.4018	1.35843	0.297918	1.05584	0.777252	1680.98	15.6231	1712.68	11.2403	1751.65	15.6433	1751.65	15.6433	95.9653
SY-A-Spot 97	235.947	363133	4.07419	9.30542	0.729202	4.72492	1.40978	0.31902	1.20655	0.855838	1784.94	18.8118	1771.67	11.8148	1756.05	13.3403	1756.05	13.3403	101.646
SY-A-Spot 205	225.771	77633.6	4.42707	9.30253	0.945631	4.55293	1.31969	0.307312	0.920528	0.697532	1727.47	13.9494	1740.7	10.9872	1756.61	17.2969	1756.61	17.2969	98.3406
SY-A-Spot 217	209.972	93512.6	5.58288	9.28703	0.979227	4.48395	1.57384	0.302152	1.23211	0.782867	1701.97	18.4303	1728.01	13.0672	1759.66	17.9047	1759.66	17.9047	96.7215
SY-A-Spot 110	116.834	61556.5	2.92317	9.28571	0.925511	4.60942	1.4502	0.310563	1.11648	0.769876	1743.47	17.0554	1750.97	12.1006	1759.92	16.9237	1759.92	16.9237	99.0654
SY-A-Spot 131	388.646	83837	3.75773	9.26647	1.01017	4.64566	1.61435	0.312355	1.25924	0.780027	1752.29	19.3207	1757.51	13.4892	1763.71	18.4613	1763.71	18.4613	99.3521
SY-A-Spot 314	365.789	276129	3.07333	9.25018	0.68426	4.53083	1.20492	0.3041	0.991777	0.823106	1711.61	14.9086	1736.65	10.0228	1766.93	12.5012	1766.93	12.5012	96.8689
SY-A-Spot 281	70.5386	12939.7	1.90461	9.17475	1.0821	4.73724	1.57244	0.315361	1.14089	0.725553	1767.03	17.633	1773.85	13.1841	1781.87	19.7317	1781.87	19.7317	99.1673
SY-A-Spot 152	327.734	129099	4.61363	9.13553	0.824973	4.87981	1.36638	0.323462	1.08923	0.797163	1806.62	17.1613	1798.78	11.5149	1789.68	15.028	1789.68	15.028	100.946
SY-A-Spot 123	184.782	67205.3	5.65208	9.13477	0.864444	4.89416	1.3396	0.324387	1.02337	0.763931	1811.12	16.1584	1801.25	11.2948	1789.83	15.7468	1789.83	15.7468	101.189
SY-A-Spot 250	401.738	1.52874e+06	3.67646	9.0946	0.609076	4.87583	1.09245	0.321751	0.906909	0.830157	1798.28	14.2316	1798.09	9.20502	1797.86	11.0852	1797.86	11.0852	100.023
SY-A-Spot 155	215.143	73199	2.26815	9.0888	0.816465	4.75813	1.26728	0.313784	0.969216	0.764801	1759.3	14.9227	1777.54	10.6334	1799.02	14.8577	1799.02	14.8577	97.7923
SY-A-Spot 30	518.136	45144.1	24.207	9.08645	0.834964	4.17921	1.33285	0.275535	1.03891	0.779463	1568.83	14.4671	1669.95	10.9209	1799.49	15.1934	1799.49	15.1934	87.1823
SY-A-Spot 305	121.133	112227	3.72138	9.06422	0.843237	4.92604	1.51116	0.323979	1.25401	0.829837	1809.13	19.7814	1806.73	12.7555	1803.94	15.3337	1803.94	15.3337	100.288
SY-A-Spot 247	528.857	174999	8.11199	9.05824	0.685992	4.84299	1.30428	0.318306	1.1093	0.850512	1781.45	17.2663	1792.4	10.9773	1805.14	12.472	1805.14	12.472	98.6876
SY-A-Spot 234	240.271	220033	2.03225	9.05325	0.890277	4.84545	1.42333	0.318293	1.11052	0.780232	1781.39	17.2847	1792.83	11.9804	1806.14	16.1849	1806.14	16.1849	98.6293
SY-A-Spot 266	430.046	123301	4.98958	9.0264	0.818803	4.7776	1.4023	0.312904	1.13842	0.811825	1754.98	17.4904	1780.97	11.7748	1811.54	14.8755	1811.54	14.8755	96.8778
SY-A-Spot 44	321.701	55893.8	0.852791	8.95188	0.904276	4.13052	1.80313	0.268291	1.55999	0.865156	1532.12	21.273	1660.36	14.7411	1826.59	16.3984	1826.59	16.3984	83.8789
SY-A-Spot 96	144.801	122702	1.23926	8.90068	0.822013	5.16221	1.49111	0.333386	1.24407	0.834323	1854.77	20.0519	1846.41	12.6842	1836.99	14.8894	1836.99	14.8894	100.968
SY-A-Spot 243	70.3682	45107.3	2.53863	8.87785	1.00366	5.14598	1.43298	0.331485	1.02279	0.713749	1845.57	16.4146	1843.73	12.1834	1841.64	18.1676	1841.64	18.1676	100.214
SY-A-Spot 46	334.44	524204	6.47186	8.86337	1.01888	5.10535	1.57262	0.328331	1.19791	0.761733	1830.29	19.0876	1837	13.3534	1844.59	18.4366	1844.59	18.4366	99.2246
SY-A-Spot 28	67.1969	68643.5	0.831986	8.84864	0.898291	5.08637	1.36272	0.326567	1.02474	0.751978	1821.72	16.262	1833.83	11.5639	1847.6	16.2483	1847.6	16.2483	98.5993
SY-A-Spot 40	458.316	152486	5.60384	8.80362	0.699958	5.17868	1.47599	0.330802	1.29946	0.880401	1842.27	20.8228	1849.12	12.562	1856.82	12.6462	1856.82	12.6462	99.2165
SY-A-Spot 3	278.081	118301	3.67753	8.75823	0.675494	5.21087	1.14834	0.331142	0.92865	0.80869	1843.91	14.8923	1854.39	9.78298	1866.15	12.1923	1866.15	12.1923	98.8083
SY-A-Spot 59	180.129	89026	2.62814	8.74033	0.794052	5.20559	1.57335	0.330131	1.35827	0.863301	1839.01	21.732	1853.53	13.4019	1869.85	14.3259	1869.85	14.3259	98.3512
SY-A-Spot 200	124.776	160309	2.37083	8.63069	0.806321	5.54459	1.52556	0.347219	1.29506	0.848907	1921.3	21.5166	1907.54	13.1241	1892.58	14.5057	1892.58	14.5057	101.518
SY-A-Spot 16	549.64	620147	2.23591	8.52206	0.773711	5.44935	1.39471	0.336959	1.16042	0.832018	1872.02	18.8536	1892.65	11.9664	1915.34	13.8811	1915.34	13.8811	97.7384
SY-A-Spot 22	330.422	220431	4.11264	8.51663	0.988659	5.49326	1.63486	0.339458	1.30204	0.796425	1884.06	21.2717	1899.54	14.0445	1916.49	17.7358	1916.49	17.7358	98.308
SY-A-Spot 273	268.802	63144.3	2.94239	8.5087	0.843549	5.35407	1.42141	0.330548	1.14405	0.804865	1841.04	18.3218	1877.54	12.1619	1918.16	15.1293	1918.16	15.1293	95.9795
SY-A-Spot 92	61.7925	69035.8	1.26815	8.49836	0.828354	5.4888	1.63308	0.338454	1.40741	0.861809	1879.23	22.9423	1898.85	14.0275	1920.34	14.8528	1920.34	14.8528	97.8593
SY-A-Spot 179	164.143	1.00297e+06	10.2463	8.45084	0.802513	5.40371	1.25753	0.331345	0.968172	0.769899	1844.9	15.5332	1885.44	10.7752	1930.38	14.3723	1930.38	14.3723	95.5715
SY-A-Spot 47	162.589	64583.7	4.95984	8.44338	0.745037	5.58924	1.46399	0.342418	1.26023	0.86082	1898.29	20.7223	1914.44	12.6097	1931.97	13.3403	1931.97	13.3403	98.257
SY-A-Spot 312	489.519	42771.5	2.34182	8.40625	0.934319	4.70806	1.92847	0.287165	1.68703	0.874799	1627.35	24.2628	1768.67	16.1523	1939.85	16.7146	1939.85	16.7146	83.8903
SY-A-Spot 192	102.338	194265	2.87977	8.36019	0.963958	5.90621	1.40967	0.358272	1.02857	0.729652	1973.98	17.4895	1962.15	12.2416	1949.68	17.2249	1949.68	17.2249	101.246
SY-A-Spot 315	104.001	97534.3	2.99456	8.2971	0.833184	5.83523	1.39029	0.351295	1.11298	0.800535	1940.78	18.6521	1951.66	12.0521	1963.2	14.8641	1963.2	14.8641	98.8579
SY-A-Spot 83	136.308	47585.1	2.2255	8.20717	0.742387	5.99378	1.47777	0.356929	1.27775	0.864652	1967.6	21.6667	1974.94	12.8602	1982.62	13.216	1982.62	13.216	99.2423
SY-A-Spot 164	14.8483	7216.72	2.7055	7.79498	1.31374	6.68787	1.75286	0.37826	1.16043	0.662024	2068.15	20.5305	2071.02	15.4843	2073.86	23.1418	2073.86	23.1418	99.7249
SY-A-Spot 85	123.936	85425.2	1.59357	7.77567	1.0405	6.26408	1.8219	0.353413	1.49555	0.820875	1950.88	25.1753	2013.44	15.9539	2078.23	18.3189	2078.23	18.3189	93.8721
SY-A-Spot 137	15.1275	8322.84	1.94261	7.72677	1.3799	6.71803	1.92743	0.376641	1.34568	0.698174	2060.57	23.734	2075	17.0367	2089.33	24.2628	2089.33	24.2628	98.6238
SY-A-Spot 301	53.1649	77232.4	1.42409	7.55607	0.909472	6.82977	1.48365	0.374447	1.17221	0.790086	2050.29	20.5868	2089.59	13.1414	2128.52	15.9235	2128.52	15.9235	96.3247
SY-A-Spot 111	86.4801	90551.9	1.35862	6.12308	0.696726	10.6703	1.40024	0.474063	1.2146	0.86742	2501.35	25.1809	2494.85	13.0002	2489.54	11.7419	2489.54	11.7419	100.474
SY-A-Spot 285	95.3912	260800	1.51089	6.06432	0.826188	10.5014	1.49472	0.462081	1.24563	0.833354	2448.74	25.3779	2480.04	13.8584	2505.78	13.8984	2505.78	13.8984	97.7237
SY-A-Spot 119	119.632	149915	1.54086	5.85341	0.867573	11.3205	1.39404	0.480797	1.09118	0.782743	2530.74	22.8392	2549.89	13.0067	2565.15	14.5097	2565.15	14.5097	98.6582
SY-A-Spot 50	832.032	1.40339e+06	9.56414	5.60184	0.794989	11.1799	1.63217	0.454417	1.42547	0.87336	2414.86	28.7107	2538.24	15.2132	2638.37	13.2015	2638.37	13.2015	91.5284
SY-A-Spot 258	160.639	174562	4.78689	5.51087	0.857739	12.3202	1.43989	0.492636	1.15653	0.803209	2582.07	24.6065	2629.11	13.5236	2665.52	14.2104	2665.52	14.2104	96.8692
SY-A-Spot 149	147.658	752375	1.38324	5.43614	0.898825	13.1502	1.31839	0.518692	0.964497	0.731574	2693.63	21.2354	2690.49	12.4412	2688.11	14.8562	2688.11	14.8562	100.205
SY-A-Spot 168	84.3699	36807.4	1.37517	5.42401	0.744874	12.643	1.7896	0.497573	1.62721	0.909262	2603.36	34.8526	2653.42	16.8409	2691.8	12.3067	2691.8	12.3067	96.7144
SY-A-Spot 187	71.6545	36872.9	1.17566	5.38117	0.831428	12.9569	1.46524	0.505901	1.2065	0.823418	2639.11	26.1287	2676.52	13.8127	2704.9	13.7237	2704.9	13.7237	97.5677
SY-A-Spot 246	94.8294	37353.1	1.21803	5.35514	0.763025	13.3896	1.35717	0.520266	1.12237	0.82699	2700.31	24.7606	2707.52	12.8235	2712.9	12.5851	2712.9	12.5851	99.5358
SY-A-Spot 189	123.623	219454	2.82795	5.3487	0.830273	13.0788	1.25011	0.507581	0.934565	0.747589	2646.29	20.284	2685.36	11.7923	2714.88	13.6917	2714.88	13.6917	97.4735
SY-A-Spot 166	47.4361	45717	2.47578	5.32007	0.741526	13.4004	1.13964	0.517276	0.865401	0.759363	2687.62	19.0193	2708.29	10.7685	2723.73	12.2146	2723.73	12.2146	98.6741
SY-A-Spot 293	370.158	146651	4.83587	5.31738	0.749892	12.5563	1.31834	0.484448	1.08429	0.822466	2546.61	22.8112	2646.95	12.3994	2724.56	12.3515	2724.56	12.3515	93.4687
SY-A-Spot 202	414.685	454273	2.25004	5.31655	0.727046	12.7275	1.48724	0.490976	1.29742	0.872365	2574.9	27.5416	2659.69	14.002	2724.82	11.9748	2724.82	11.9748	94.4979
SY-A-Spot 55	93.4545	29416.4	2.25313	5.29726	0.870065	13.4777	1.38663	0.518031	1.07969	0.778644	2690.83	23.7518	2713.73	13.1079	2730.81	14.3233	2730.81	14.3233	98.5358
SY-A-Spot 251	130.87	70477.8	6.1621	5.2869	0.672063	13.5483	1.27221	0.519725	1.0802	0.849079	2698.01	23.8141	2718.66	12.0304	2734.03	11.0596	2734.03	11.0596	98.6825
SY-A-Spot 54	173.097	77767.4	1.63321	5.28061	0.763538	12.5176	1.86562	0.479616	1.70222	0.912414	2525.59	35.5698	2644.05	17.5435	2735.98	12.5632	2735.98	12.5632	92.3102
SY-A-Spot 163	375.7	1.62552e+06	3.10526	5.27561	0.806758	10.7441	1.41695	0.411272	1.16485	0.822086	2220.73	21.8831	2501.24	13.1631	2737.54	13.2727	2737.54	13.2727	81.1214
SY-A-Spot 103	97.2808	106834	1.74591	5.27088	0.825393	13.7904	1.5169	0.527409	1.27268	0.839001	2730.52	28.3292	2735.42	14.362	2739.02	13.5775	2739.02	13.5775	99.6899
SY-A-Spot 23	484.525	202863	2.50672	5.2275	0.871224	13.4168	1.33701	0.5089	1.01418	0.758543	2651.93	22.0499	2709.45	12.6347	2752.61	14.3172	2752.61	14.3172	96.3424
SY-A-Spot 298	126.228	139633	1.65757	5.15939	0.805989	14.225	1.39512	0.532521	1.13874	0.816234	2752.07	25.508	2764.82	13.2361	2774.14	13.2152	2774.14	13.2152	99.2044
SY-A-Spot 171	41.4813	56072	1.49344	5.15721	1.11164	14.1908	1.75524	0.531019	1.35836	0.773885	2745.74	30.3714	2762.54	16.6507	2774.83	18.2274	2774.83	18.2274	98.9518
SY-A-Spot 6	582.863	1.00927e+06	5.69365	5.13888	0.730987	13.3995	1.22875	0.499624	0.987671	0.803799	2612.18	21.2126	2708.22	11.6106	2780.67	11.978	2780.67	11.978	93.9408
SY-A-Spot 256	94.7628	165061	3.88587	5.08778	0.766107	15.0148	1.34155	0.554288	1.10129	0.820907	2842.98	25.3177	2816.18	12.772	2797.03	12.5388	2797.03	12.5388	101.643
SY-A-Spot 142	88.6326	66894.7	1.33168	5.0725	0.854384	14.5826	1.52738	0.536716	1.26606	0.828911	2769.69	28.5053	2788.4	14.5145	2801.95	13.9774	2801.95	13.9774	98.8485
SY-A-Spot 297	232.721	184675	0.530552	5.02863	0.704034	14.567	1.43193	0.531504	1.2469	0.870783	2747.79	27.896	2787.38	13.6064	2816.15	11.5026	2816.15	11.5026	97.5724
SY-A-Spot 53	272.95	36639.7	2.27796	5.01581	0.865792	14.2459	1.54238	0.518465	1.27645	0.827588	2692.67	28.0957	2766.22	14.6348	2820.32	14.1365	2820.32	14.1365	95.4737
SY-A-Spot 51	102.817	716953	1.2426	5.00988	0.812379	14.7618	1.4535	0.536606	1.20528	0.829226	2769.22	27.1331	2800.01	13.823	2822.25	13.2618	2822.25	13.2618	98.121
SY-A-Spot 277	287.813	171827	2.37921	5.00903	0.867085	14.4077	1.30346	0.523645	0.973225	0.746648	2714.62	21.5619	2776.94	12.3767	2822.53	14.1549	2822.53	14.1549	96.1767
SY-A-Spot 88	465.943	240531	2.86924	4.92966	0.778611	15.0403	1.32723	0.537973	1.07486	0.809846	2774.96	24.2372	2817.79	12.637	2848.57	12.6845	2848.57	12.6845	97.4157
SY-A-Spot 255	1392.29	278456	4.16495	4.79639	0.747609	15.2152	1.72942	0.529518	1.55948	0.901735	2739.42	34.8038	2828.81	16.4787	2893.13	12.1277	2893.13	12.1277	94.6872
SY-A-Spot 48	49.9168	500911	1.56456	4.74938	0.851147	16.5256	1.36697	0.569483	1.06966	0.7825	2905.7	25.0201	2907.71	13.0888	2909.1	13.7921	2909.1	13.7921	99.8831
SY-A-Spot 198	75.0374	617991	5.32172	4.00537	0.795061	20.777	1.24427	0.603827	0.957128	0.769226	3045.24	23.2298	3128.25	12.0546	3181.94	12.5923	3181.94	12.5923	95.7037
3PS-100							Isotope ratios						Apparent ages (Ma)
Analysis	U	206Pb	U/Th	206Pb*	±	207Pb*	±	206Pb*	±	error	206Pb*	±	207Pb*	±	206Pb*	±	Best age	±	Conc
	(ppm)	204Pb		207Pb*	(%)	235U*	(%)	238U	(%)	corr.	238U*	(Ma)	235U	(Ma)	207Pb*	(Ma)	(Ma)	(Ma)	(%)
Leary 3PS-100-Spot 148	739.8	5871.27	0.677017	13.2929	4.84242	0.428432	5.4816	0.0413228	2.56884	0.468629	261.027	6.57142	362.062	16.6955	1074.62	97.3126	261.027	6.57142	NA
Leary 3PS-100-Spot 2	225.329	10858.6	0.815391	14.4062	3.44468	0.435373	5.38046	0.0455092	4.13322	0.768191	286.892	11.5979	366.985	16.5724	911.064	70.9409	286.892	11.5979	NA
Leary 3PS-100-Spot 237	445.144	57717.1	1.70194	18.9757	0.650386	0.365955	1.46144	0.0503865	1.30875	0.895516	316.894	4.04706	316.651	3.97563	315.832	14.7908	316.894	4.04706	NA
Leary 3PS-100-Spot 61	530.52	76620	1.45008	18.374	0.970831	0.405416	1.48231	0.0540495	1.12015	0.755678	339.335	3.70276	345.569	4.34179	388.649	21.7962	339.335	3.70276	NA
Leary 3PS-100-Spot 106	252.377	58179.4	1.76958	18.8177	1.38745	0.396651	1.88771	0.054158	1.28001	0.678075	339.999	4.23924	339.216	5.44365	334.841	31.4405	339.999	4.23924	NA
Leary 3PS-100-Spot 184	165.883	45937.5	2.42442	18.8164	0.9591	0.406013	1.465	0.0554324	1.1074	0.755908	347.787	3.74936	346	4.29556	334.993	21.727	347.787	3.74936	NA
Leary 3PS-100-Spot 192	437.088	75500.5	1.62308	18.6214	0.750471	0.414872	1.50569	0.0560551	1.30533	0.866934	351.59	4.46651	352.378	4.48297	358.533	16.9259	351.59	4.46651	NA
Leary 3PS-100-Spot 240	70.9992	79927.8	1.47674	17.8467	1.20627	0.434558	1.76936	0.0562721	1.29443	0.73158	352.914	4.44542	366.408	5.44225	453.648	26.777	352.914	4.44542	NA
Leary 3PS-100-Spot 165	406.413	18072.9	4.56965	16.755	3.02945	0.468614	3.66758	0.0569701	2.06726	0.563658	357.173	7.18287	390.231	11.8833	592.129	65.6795	357.173	7.18287	NA
Leary 3PS-100-Spot 225	63.9427	4885.04	1.17272	16.819	3.15069	0.470188	3.34731	0.0573798	1.13032	0.337681	359.671	3.9541	391.319	10.8703	583.834	68.4292	359.671	3.9541	NA
Leary 3PS-100-Spot 90	481.264	1.04607e+06	4.66284	18.4929	0.959557	0.449484	1.67833	0.0603123	1.37697	0.820441	377.524	5.04913	376.918	5.28461	374.151	21.5989	377.524	5.04913	NA
Leary 3PS-100-Spot 182	218.169	875839	1.44043	18.0263	0.865923	0.477257	1.24088	0.0624234	0.888798	0.716264	390.346	3.36644	396.189	4.0706	431.374	19.2962	390.346	3.36644	NA
Leary 3PS-100-Spot 56	409.662	70138.6	1.43316	18.3939	0.846982	0.484802	1.65741	0.0647031	1.42465	0.859565	404.164	5.58116	401.362	5.49492	386.219	19.0239	404.164	5.58116	104.646
Leary 3PS-100-Spot 42	233.452	569167	1.17117	17.5603	0.949622	0.510527	1.46251	0.0650488	1.11228	0.760525	406.257	4.37925	418.803	5.01906	489.446	20.9577	406.257	4.37925	83.0034
Leary 3PS-100-Spot 313	209.86	239682	1.91534	18.0684	0.838074	0.502382	1.3585	0.0658629	1.06919	0.787034	411.183	4.25905	413.314	4.61262	426.18	18.693	411.183	4.25905	96.481
Leary 3PS-100-Spot 25	212.214	459784	6.63135	17.9638	0.858638	0.507411	1.37281	0.0661374	1.07114	0.780255	412.843	4.28349	416.707	4.69214	439.104	19.1294	412.843	4.28349	94.0194
Leary 3PS-100-Spot 81	124.016	40672.2	1.903	17.8254	0.958529	0.511532	1.54823	0.0661607	1.21583	0.785303	412.983	4.86372	419.479	5.32016	456.333	21.2678	412.983	4.86372	90.5003
Leary 3PS-100-Spot 238	308.253	102501	1.07638	17.8278	0.7873	0.513009	1.33698	0.0663606	1.08059	0.808232	414.192	4.33496	420.47	4.603	456.041	17.4753	414.192	4.33496	90.8234
Leary 3PS-100-Spot 154	436.731	71698.6	1.70808	18.1874	0.905428	0.505064	1.66689	0.0666505	1.39955	0.839614	415.945	5.63751	415.125	5.6798	411.522	20.2465	415.945	5.63751	101.075
Leary 3PS-100-Spot 107	119.699	40705.1	0.842932	17.7341	0.920874	0.524736	1.34995	0.0675208	0.987092	0.731208	421.202	4.02474	428.31	4.71733	467.687	20.4131	421.202	4.02474	90.0607
Leary 3PS-100-Spot 202	128.921	34195.6	1.06556	17.3888	1.89259	0.549138	2.88775	0.0692851	2.18111	0.755296	431.847	9.1105	444.432	10.3943	511.052	41.6094	431.847	9.1105	84.5017
Leary 3PS-100-Spot 139	919.968	422923	3.06747	17.9267	0.672714	0.542189	1.1687	0.0705244	0.955673	0.817724	439.314	4.05855	439.867	4.17203	443.706	14.9687	439.314	4.05855	99.0102
Leary 3PS-100-Spot 83	117.313	20266.4	1.26195	17.134	1.37446	0.589599	1.92608	0.0732997	1.34931	0.700548	456.005	5.94034	470.611	7.25404	543.439	30.0538	456.005	5.94034	83.911
Leary 3PS-100-Spot 275	137.38	28787.8	1.6028	17.7414	0.921807	0.589631	1.66565	0.0759026	1.38732	0.8329	471.619	6.30925	470.632	6.27339	466.764	20.4153	471.619	6.30925	101.04
Leary 3PS-100-Spot 9	115.737	893237	2.89138	16.8019	1.07845	0.625674	1.91103	0.076277	1.57766	0.825552	473.862	7.20777	493.397	7.46829	586.088	23.4047	473.862	7.20777	80.8517
Leary 3PS-100-Spot 302	157.014	40280.5	2.28853	17.5832	0.979459	0.601754	1.48548	0.0767724	1.11683	0.751833	476.829	5.1332	478.346	5.66664	486.585	21.6188	476.829	5.1332	97.9949
Leary 3PS-100-Spot 93	541.401	105364	13.3971	16.9001	0.958182	0.649217	1.44402	0.0796099	1.08032	0.748131	493.794	5.13535	507.997	5.77192	573.422	20.8265	493.794	5.13535	86.1136
Leary 3PS-100-Spot 60	211.872	25361.5	1.09999	17.2962	1.12051	0.635983	1.60737	0.0798147	1.15243	0.716967	495.017	5.49119	499.816	6.3448	522.788	24.5797	495.017	5.49119	94.6878
Leary 3PS-100-Spot 309	175.944	35089.3	1.02501	17.0649	1.1359	0.653294	1.34546	0.0808911	0.721107	0.535954	501.439	3.47886	510.504	5.3984	552.279	24.793	501.439	3.47886	90.7945
Leary 3PS-100-Spot 248	249.732	101199	1.8766	16.8479	0.95106	0.66277	1.41288	0.0810207	1.04485	0.739519	502.212	5.04818	516.307	5.71835	580.149	20.6461	502.212	5.04818	86.5661
Leary 3PS-100-Spot 232	165.514	118617	3.45535	17.0371	0.711558	0.676267	1.32087	0.0835993	1.11283	0.842495	517.571	5.53451	524.516	5.41089	555.834	15.5151	517.571	5.53451	93.116
Leary 3PS-100-Spot 95	209.615	99392.9	3.91901	17.451	0.770104	0.660338	1.53721	0.0836131	1.3304	0.865462	517.653	6.61759	514.821	6.20781	503.228	16.948	517.653	6.61759	102.866
Leary 3PS-100-Spot 29	700.515	55042	1.44234	16.7127	0.943546	0.691065	1.44263	0.0838016	1.09129	0.756457	518.774	5.43953	533.44	5.98618	597.587	20.4163	518.774	5.43953	86.8115
Leary 3PS-100-Spot 88	44.0021	1.02579e+06	5.87508	16.5413	1.16524	0.701306	1.73061	0.0841715	1.27954	0.739356	520.974	6.4038	539.571	7.24371	619.868	25.1517	520.974	6.4038	84.046
Leary 3PS-100-Spot 295	306.545	70004	41.9116	17.176	0.843623	0.686641	1.54675	0.0855737	1.29643	0.838165	529.306	6.58792	530.78	6.39385	538.059	18.4691	529.306	6.58792	98.3732
Leary 3PS-100-Spot 28	266.885	35496.8	1.16948	17.085	1.15121	0.692633	2.5926	0.0858629	2.32299	0.896007	531.023	11.8412	534.381	10.7726	549.693	25.1561	531.023	11.8412	96.6035
Leary 3PS-100-Spot 77	53.8266	13478.3	1.02864	16.9824	1.14551	0.705588	1.69046	0.0869437	1.24316	0.735397	537.436	6.41025	542.123	7.10097	562.807	24.9479	537.436	6.41025	95.4922
Leary 3PS-100-Spot 115	161.603	50964.6	0.835782	16.9398	1.02005	0.709877	1.66154	0.0872527	1.31157	0.789368	539.269	6.78511	544.673	7.00432	568.32	22.2196	539.269	6.78511	94.8881
Leary 3PS-100-Spot 227	260.366	28188.7	2.54057	16.2005	1.2932	0.753238	1.82536	0.0885417	1.28824	0.705746	546.907	6.75487	570.101	7.96302	664.669	27.6945	546.907	6.75487	82.2825
Leary 3PS-100-Spot 160	199.037	26251.1	2.37421	17.1977	0.823959	0.717002	1.36222	0.0894702	1.08478	0.796328	552.403	5.74276	548.895	5.77606	535.319	18.0549	552.403	5.74276	103.191
Leary 3PS-100-Spot 177	196.704	863710	1.7347	16.8693	0.961516	0.734333	1.43242	0.089883	1.06175	0.741229	554.845	5.64468	559.093	6.15838	577.391	20.9078	554.845	5.64468	96.0953
Leary 3PS-100-Spot 142	99.4509	72292.6	1.86514	16.9194	0.825388	0.733761	1.3776	0.0900799	1.10296	0.800637	556.01	5.87552	558.758	5.92002	570.92	17.9532	556.01	5.87552	97.3884
Leary 3PS-100-Spot 205	106.105	802285	1.22958	16.7088	1.31843	0.745297	1.92014	0.0903571	1.39595	0.727006	557.649	7.45732	565.492	8.32593	598.108	28.5346	557.649	7.45732	93.2354
Leary 3PS-100-Spot 103	287.627	186478	2.02141	16.8824	0.857998	0.741118	1.43358	0.0907838	1.14847	0.801122	560.171	6.16181	563.058	6.19606	575.663	18.66	560.171	6.16181	97.3089
Leary 3PS-100-Spot 91	146.236	1.05828e+06	2.10578	16.4017	0.756153	0.771487	1.17065	0.091813	0.89368	0.763402	566.251	4.84458	580.616	5.1767	638.175	16.2677	566.251	4.84458	88.7297
Leary 3PS-100-Spot 183	461.794	27653.5	0.617495	16.1967	1.11113	0.795772	1.95288	0.0935196	1.60597	0.822359	576.319	8.85386	594.441	8.78728	665.17	23.7965	576.319	8.85386	86.6424
Leary 3PS-100-Spot 213	278.976	61578.2	0.536935	16.7722	0.882128	0.769634	1.44674	0.0936616	1.1467	0.792606	577.156	6.33061	579.553	6.38893	589.884	19.1286	577.156	6.33061	97.8422
Leary 3PS-100-Spot 269	315.128	73625.1	1.52089	16.8944	0.753343	0.767448	1.2416	0.0940761	0.986934	0.79489	579.599	5.47064	578.298	5.47416	574.141	16.383	579.599	5.47064	100.951
Leary 3PS-100-Spot 287	10.5819	5081.85	1.88145	16.4059	1.63946	0.791947	2.3366	0.0942726	1.66489	0.712528	580.756	9.24623	592.276	10.4858	637.613	35.2885	580.756	9.24623	91.0828
Leary 3PS-100-Spot 80	148.881	146983	2.63714	16.7884	0.977089	0.777153	1.68375	0.0946681	1.37125	0.8144	583.086	7.64462	583.858	7.47649	587.786	21.1778	583.086	7.64462	99.2004
Leary 3PS-100-Spot 144	117.849	46039.3	0.879903	16.4566	0.766172	0.793621	1.28752	0.0947634	1.03474	0.803671	583.647	5.77394	593.224	5.78458	630.979	16.5241	583.647	5.77394	92.4987
Leary 3PS-100-Spot 314	254.391	138428	2.97502	16.609	0.902196	0.797868	1.6566	0.096153	1.38938	0.838692	591.824	7.85654	595.625	7.465	611.045	19.5057	591.824	7.85654	96.8545
Leary 3PS-100-Spot 32	147.443	143244	0.799458	16.6274	0.911916	0.797402	1.65542	0.0962033	1.3816	0.834594	592.121	7.8163	595.362	7.45725	608.653	19.7044	592.121	7.8163	97.2838
Leary 3PS-100-Spot 156	95.5898	812967	0.718305	16.8009	0.980017	0.790807	1.42292	0.0964028	1.03163	0.72501	593.294	5.84738	591.63	6.38024	586.217	21.2672	593.294	5.84738	101.207
Leary 3PS-100-Spot 254	267.331	100869	2.09025	16.568	0.729912	0.810335	1.32244	0.0974145	1.10275	0.83388	599.239	6.31029	602.642	6.01056	616.382	15.7811	599.239	6.31029	97.2188
Leary 3PS-100-Spot 259	40.0566	17769.6	1.81407	16.0505	1.16038	0.841456	1.67542	0.0979959	1.20854	0.721334	602.653	6.95323	619.949	7.77379	684.558	24.7531	602.653	6.95323	88.0355
Leary 3PS-100-Spot 190	280.807	669150	1.41666	16.6035	0.946379	0.813769	1.9718	0.0980365	1.72985	0.877293	602.892	9.9563	604.566	8.98306	611.77	20.4629	602.892	9.9563	98.5488
Leary 3PS-100-Spot 257	93.3046	53478	2.08389	16.2833	1.10436	0.830214	1.4802	0.0980889	0.985582	0.665845	603.2	5.67536	613.731	6.8178	653.728	23.676	603.2	5.67536	92.2707
Leary 3PS-100-Spot 18	774.11	1.18844e+06	3.12206	16.0859	0.873854	0.842907	1.7078	0.0983817	1.4673	0.859174	604.918	8.47222	620.749	7.93144	679.807	18.6583	604.918	8.47222	88.9838
Leary 3PS-100-Spot 151	142.836	27039.4	1.37418	15.7958	1.25216	0.86255	1.59808	0.0988584	0.992948	0.621339	607.715	5.7586	631.514	7.51471	718.572	26.5836	607.715	5.7586	84.5726
Leary 3PS-100-Spot 169	179.321	73672.6	2.04723	16.2852	0.761706	0.838149	1.52304	0.0990379	1.31888	0.865955	608.768	7.66149	618.124	7.05161	653.478	16.3307	608.768	7.66149	93.1582
Leary 3PS-100-Spot 264	350.741	59401.9	2.68805	16.4537	1.06283	0.833168	1.72733	0.0994681	1.36164	0.788291	611.291	7.94113	615.369	7.97159	631.358	22.9114	611.291	7.94113	96.8216
Leary 3PS-100-Spot 114	315.889	108830	1.56897	16.712	0.769386	0.824183	1.49022	0.0999403	1.27624	0.856413	614.059	7.4752	610.38	6.83662	597.71	16.66	614.059	7.4752	102.735
Leary 3PS-100-Spot 89	327.289	55750.2	0.96654	16.1802	1.19798	0.854664	1.85401	0.100338	1.41499	0.763206	616.391	8.31788	627.206	8.67527	667.322	25.6288	616.391	8.31788	92.3677
Leary 3PS-100-Spot 290	94.6845	33328.6	1.36047	16.0941	1.54675	0.862335	1.89693	0.100701	1.09813	0.5789	618.513	6.47643	631.397	8.91888	678.716	33.0445	618.513	6.47643	91.1298
Leary 3PS-100-Spot 12	163.828	245101	1.06243	16.3197	0.987022	0.852455	3.19981	0.100942	3.04378	0.951237	619.928	17.9904	625.996	14.9524	648.899	21.2153	619.928	17.9904	95.5354
Leary 3PS-100-Spot 8	97.3042	387851	1.09231	15.9837	0.979537	0.878973	1.54451	0.101939	1.19416	0.773164	625.762	7.12136	640.428	7.3364	693.457	20.8729	625.762	7.12136	90.2381
Leary 3PS-100-Spot 33	46.2189	34497	2.15225	16.1767	1.23935	0.871541	1.75605	0.102298	1.24408	0.708452	627.862	7.44275	636.404	8.30357	667.809	26.5222	627.862	7.44275	94.0181
Leary 3PS-100-Spot 216	94.8077	153405	1.06507	16.5451	1.38722	0.854709	2.10747	0.102606	1.58652	0.752809	629.665	9.51739	627.23	9.86158	619.38	29.9315	629.665	9.51739	101.661
Leary 3PS-100-Spot 163	99.1493	54421.3	2.17901	16.3152	1.09077	0.874893	1.61494	0.10357	1.19091	0.73743	635.297	7.20496	638.22	7.65199	649.51	23.4406	635.297	7.20496	97.8118
Leary 3PS-100-Spot 303	132.304	53334.5	1.06951	16.0004	1.0009	0.917493	1.67816	0.106518	1.347	0.802666	652.492	8.35891	661.033	8.15345	691.206	21.3284	652.492	8.35891	94.3992
Leary 3PS-100-Spot 291	470.811	189808	1.86033	16.2966	0.69259	0.90724	1.30854	0.107277	1.11022	0.848444	656.917	6.93393	655.589	6.32031	651.947	14.8589	656.917	6.93393	100.762
Leary 3PS-100-Spot 256	240.306	170904	1.10123	16.3969	0.830713	0.910727	1.34506	0.108352	1.05787	0.786488	663.169	6.66668	657.444	6.50977	638.807	17.8805	663.169	6.66668	103.814
Leary 3PS-100-Spot 208	349.768	139563	2.55036	15.6571	1.81344	0.955266	2.6931	0.108524	1.99104	0.739311	664.168	12.5654	680.841	13.3606	737.303	38.3711	664.168	12.5654	90.0807
Leary 3PS-100-Spot 39	334.173	578558	1.43547	16.1125	0.736591	0.957358	1.61305	0.111924	1.43505	0.889649	683.914	9.31182	681.927	8.01108	676.307	15.7428	683.914	9.31182	101.125
Leary 3PS-100-Spot 200	225.881	57009.7	1.07711	14.7121	0.796983	1.07936	1.67049	0.11522	1.46811	0.878851	702.992	9.77788	743.32	8.80482	867.658	16.5278	702.992	9.77788	81.0218
Leary 3PS-100-Spot 123	11.2102	15144.6	4.03918	14.7128	1.72247	1.13229	2.35791	0.120876	1.61023	0.682905	735.606	11.1941	768.846	12.7143	867.586	35.6882	735.606	11.1941	84.7877
Leary 3PS-100-Spot 69	212.202	79743.4	1.88774	15.4363	0.99321	1.11984	1.47463	0.125426	1.08998	0.739156	761.719	7.83082	762.899	7.90995	767.256	20.9216	761.719	7.83082	99.2783
Leary 3PS-100-Spot 187	67.4918	33752.9	4.27932	15.2938	1.0177	1.13542	1.41123	0.125998	0.977685	0.692788	764.992	7.05248	770.336	7.61922	786.755	21.3691	764.992	7.05248	97.2338
Leary 3PS-100-Spot 132	180.7	61753.2	2.10099	14.3726	0.724128	1.45458	2.30533	0.151691	2.18865	0.949386	910.435	18.5832	911.767	13.8724	915.91	14.8976	915.91	14.8976	99.4023
Leary 3PS-100-Spot 113	394.19	420033	8.47286	14.3209	0.602002	1.41268	1.38894	0.146792	1.2517	0.901189	882.957	10.3285	894.288	8.25786	923.317	12.3811	923.317	12.3811	95.6288
Leary 3PS-100-Spot 288	113.783	364713	3.23097	14.1452	0.645818	1.54577	0.952678	0.15865	0.700367	0.735156	949.269	6.18204	948.806	5.87362	948.64	13.2393	948.64	13.2393	100.066
Leary 3PS-100-Spot 124	127.679	281187	2.4439	14.0717	0.848381	1.59831	1.57307	0.163191	1.32469	0.842103	974.487	11.9806	969.55	9.82564	959.246	17.327	959.246	17.327	101.589
Leary 3PS-100-Spot 108	142.38	52641.5	1.18273	14.0692	0.841333	1.57104	1.27214	0.160378	0.954202	0.750076	958.876	8.50166	958.838	7.89319	959.62	17.1969	959.62	17.1969	99.9225
Leary 3PS-100-Spot 63	196.963	79221.4	1.55995	14.0299	0.904661	1.62101	1.46036	0.165017	1.1464	0.785014	984.598	10.4677	978.384	9.17106	965.37	18.4588	965.37	18.4588	101.992
Leary 3PS-100-Spot 289	86.5746	403172	1.8812	14.027	0.891252	1.53597	2.02221	0.156328	1.81522	0.897639	936.339	15.8199	944.892	12.4371	965.785	18.2072	965.785	18.2072	96.9511
Leary 3PS-100-Spot 167	119.44	53142.7	3.46803	13.9983	0.743914	1.62388	1.26215	0.164936	1.01961	0.807839	984.151	9.30608	979.493	7.93155	969.944	15.1774	969.944	15.1774	101.465
Leary 3PS-100-Spot 22	236.794	60089.2	4.75804	13.9821	0.802068	1.55862	1.47411	0.158125	1.23681	0.839018	946.351	10.886	953.92	9.11814	972.287	16.359	972.287	16.359	97.3324
Leary 3PS-100-Spot 214	121.686	36931.3	2.62373	13.9699	0.662752	1.62568	1.1201	0.164784	0.902986	0.806165	983.309	8.23511	980.188	7.04184	974.086	13.4991	974.086	13.4991	100.947
Leary 3PS-100-Spot 273	172.042	93688.8	0.395956	13.908	0.857147	1.53916	1.2672	0.155323	0.933322	0.736524	930.734	8.08878	946.166	7.79967	983.156	17.4332	983.156	17.4332	94.668
Leary 3PS-100-Spot 301	112.106	61511	1.64717	13.8754	0.999727	1.70023	1.67057	0.171175	1.33841	0.80117	1018.58	12.6103	1008.62	10.6811	987.944	20.33	987.944	20.33	103.101
Leary 3PS-100-Spot 201	84.9158	57200.6	0.681041	13.821	0.835875	1.67834	1.59518	0.168308	1.35865	0.851719	1002.78	12.6175	1000.35	10.1501	995.912	16.9861	995.912	16.9861	100.69
Leary 3PS-100-Spot 137	449.71	88636.3	1.08283	13.7547	0.643273	1.68127	1.34496	0.167794	1.18115	0.878204	999.947	10.9404	1001.46	8.56338	1005.65	13.047	1005.65	13.047	99.4333
Leary 3PS-100-Spot 116	615.118	235663	1.72407	13.7536	0.685878	1.59339	1.18671	0.159011	0.968424	0.81606	951.278	8.56492	967.625	7.40347	1005.81	13.9181	1005.81	13.9181	94.5784
Leary 3PS-100-Spot 223	52.0819	110851	1.04095	13.6709	0.894065	1.7274	1.38808	0.171347	1.0618	0.764941	1019.53	10.0127	1018.78	8.92689	1018.04	18.1069	1018.04	18.1069	100.146
Leary 3PS-100-Spot 158	379.014	99411	2.67308	13.6347	0.75067	1.72888	1.45102	0.171041	1.24176	0.85578	1017.84	11.6918	1019.34	9.33462	1023.4	15.1917	1023.4	15.1917	99.4569
Leary 3PS-100-Spot 136	27.2846	16647.1	1.23273	13.5939	1.14096	1.58152	1.67494	0.155994	1.22624	0.732106	934.476	10.6671	962.969	10.4194	1029.47	23.0873	1029.47	23.0873	90.7727
Leary 3PS-100-Spot 250	132.517	54066.4	2.74732	13.5158	0.878576	1.70841	1.48271	0.167542	1.19438	0.805537	998.552	11.0487	1011.69	9.49681	1041.1	17.7499	1041.1	17.7499	95.9129
Leary 3PS-100-Spot 129	163.226	131144	2.09669	13.491	0.892809	1.80736	1.39493	0.17692	1.07179	0.768344	1050.13	10.3862	1048.12	9.11888	1044.81	18.0281	1044.81	18.0281	100.509
Leary 3PS-100-Spot 5	121.538	72368.6	1.41578	13.4589	0.787232	1.78688	1.40912	0.1745	1.16871	0.829391	1036.86	11.1936	1040.69	9.17419	1049.65	15.8866	1049.65	15.8866	98.7812
Leary 3PS-100-Spot 175	174.532	95790.4	1.01178	13.4526	0.802799	1.58879	1.5857	0.155082	1.36747	0.862373	929.389	11.8354	965.824	9.88178	1050.6	16.1983	1050.6	16.1983	88.463
Leary 3PS-100-Spot 14	20.7675	10955.4	0.686024	13.4302	1.15134	1.75262	1.5453	0.170788	1.03071	0.666996	1016.45	9.69243	1028.13	9.99073	1053.96	23.2119	1053.96	23.2119	96.4414
Leary 3PS-100-Spot 43	85.2521	66555.3	3.2414	13.4067	0.746142	1.80661	1.58276	0.175742	1.39586	0.88191	1043.67	13.45	1047.85	10.3453	1057.48	15.0408	1057.48	15.0408	98.6937
Leary 3PS-100-Spot 119	232.529	850684	6.84097	13.3318	0.84683	1.81989	1.46765	0.176044	1.1987	0.816746	1045.33	11.5671	1052.65	9.61785	1068.76	17.0015	1068.76	17.0015	97.8076
Leary 3PS-100-Spot 75	49.0124	13157.3	0.888613	13.3175	1.23918	1.73689	1.66465	0.167836	1.11152	0.667722	1000.17	10.2977	1022.31	10.7271	1070.9	24.8791	1070.9	24.8791	93.3953
Leary 3PS-100-Spot 76	172.995	149785	1.80115	13.2981	0.717847	1.88915	1.40457	0.182283	1.20728	0.859534	1079.43	11.9991	1077.28	9.32572	1073.83	14.4074	1073.83	14.4074	100.522
Leary 3PS-100-Spot 194	17.9133	19158	2.00662	13.275	1.32848	1.90944	1.95477	0.183919	1.43397	0.733573	1088.35	14.3603	1084.39	13.027	1077.32	26.6479	1077.32	26.6479	101.024
Leary 3PS-100-Spot 82	490.54	86126.4	3.29152	13.2673	0.751228	1.84451	1.36338	0.177562	1.13775	0.834503	1053.64	11.0594	1061.47	8.97702	1078.46	15.0759	1078.46	15.0759	97.6994
Leary 3PS-100-Spot 215	188.805	53173.3	1.47542	13.2534	0.912197	1.76954	1.56253	0.170166	1.26862	0.811902	1013.03	11.8926	1034.35	10.1374	1080.6	18.3007	1080.6	18.3007	93.7467
Leary 3PS-100-Spot 36	225.305	387778	2.01966	13.214	0.693814	1.8649	1.349	0.178804	1.1569	0.8576	1060.44	11.3123	1068.72	8.9166	1086.54	13.8964	1086.54	13.8964	97.5972
Leary 3PS-100-Spot 261	63.1697	34849.5	1.66992	13.1848	0.936365	1.83436	1.93911	0.175487	1.69805	0.875684	1042.27	16.3417	1057.84	12.7434	1090.96	18.7385	1090.96	18.7385	95.5371
Leary 3PS-100-Spot 125	477.086	102006	1.6799	13.1714	0.76829	1.8631	1.13334	0.178056	0.833186	0.735157	1056.34	8.11803	1068.09	7.48858	1093	15.3671	1093	15.3671	96.6464
Leary 3PS-100-Spot 222	233.773	3.51541e+06	6.63515	13.1703	0.744652	1.95681	1.48108	0.186997	1.28027	0.864417	1105.09	13.0019	1100.79	9.95287	1093.16	14.898	1093.16	14.898	101.091
Leary 3PS-100-Spot 181	316.321	23791.8	0.824686	13.1336	1.022	1.78733	1.51239	0.170323	1.11483	0.737132	1013.89	10.4591	1040.85	9.84744	1098.76	20.4688	1098.76	20.4688	92.2763
Leary 3PS-100-Spot 152	826.96	98716.9	3.44292	13.0834	0.887136	1.90296	1.48426	0.18065	1.18996	0.801722	1070.53	11.7373	1082.13	9.87964	1106.44	17.7221	1106.44	17.7221	96.7537
Leary 3PS-100-Spot 150	111.406	14689.8	2.19017	13.0673	1.22821	1.69604	1.73475	0.160808	1.22509	0.706206	961.266	10.9404	1007.04	11.0814	1108.88	24.5191	1108.88	24.5191	86.6884
Leary 3PS-100-Spot 305	179.45	1.21307e+06	1.5609	13.0306	0.726037	1.88975	1.31251	0.178672	1.09341	0.833071	1059.72	10.6848	1077.49	8.7154	1114.48	14.4918	1114.48	14.4918	95.0863
Leary 3PS-100-Spot 10	233.871	73395.8	2.56484	13.0024	0.977842	1.99614	1.51612	0.188323	1.15864	0.764215	1112.28	11.8369	1114.2	10.2567	1118.84	19.5077	1118.84	19.5077	99.4137
Leary 3PS-100-Spot 52	87.6807	37079.1	3.23726	12.9309	0.972862	2.07218	1.51092	0.194422	1.15604	0.765122	1145.28	12.1305	1139.65	10.3483	1129.83	19.3866	1129.83	19.3866	101.368
Leary 3PS-100-Spot 168	312.485	233378	4.42517	12.8828	0.858999	2.02985	1.35744	0.189741	1.05108	0.774308	1119.97	10.8059	1125.57	9.23432	1137.26	17.0714	1137.26	17.0714	98.4796
Leary 3PS-100-Spot 84	109.233	69921.5	2.06954	12.8301	0.800234	2.05815	2.48082	0.1916	2.34821	0.946546	1130.04	24.3401	1135.01	16.9545	1145.41	15.8921	1145.41	15.8921	98.658
Leary 3PS-100-Spot 65	442.227	218252	4.79139	12.8255	0.708211	1.98186	1.44901	0.184432	1.26415	0.872421	1091.14	12.6894	1109.35	9.77914	1146.12	14.0718	1146.12	14.0718	95.2033
Leary 3PS-100-Spot 293	47.884	39407.7	1.50404	12.7818	0.912826	1.99489	1.29091	0.185012	0.912792	0.707094	1094.3	9.18685	1113.78	8.73119	1152.86	18.1373	1152.86	18.1373	94.9202
Leary 3PS-100-Spot 230	135.355	1.65798e+06	4.98683	12.7728	0.841319	2.07682	1.40995	0.192474	1.13144	0.802465	1134.76	11.7726	1141.18	9.66372	1154.25	16.6969	1154.25	16.6969	98.3114
Leary 3PS-100-Spot 199	456.802	499316	1.00849	12.7576	0.98952	2.15687	1.66792	0.199655	1.34268	0.805006	1173.47	14.4051	1167.27	11.5715	1156.62	19.6316	1156.62	19.6316	101.457
Leary 3PS-100-Spot 92	14.4698	21867.8	2.75075	12.7072	1.29218	1.94924	1.58985	0.179723	0.926224	0.582585	1065.46	9.09618	1098.19	10.6698	1164.46	25.587	1164.46	25.587	91.4983
Leary 3PS-100-Spot 6	51.4306	76872.4	2.59027	12.7027	1.07356	2.0465	1.71568	0.188624	1.33829	0.780035	1113.92	13.6905	1131.13	11.7029	1165.16	21.2907	1165.16	21.2907	95.6016
Leary 3PS-100-Spot 212	75.2406	69263.6	2.5271	12.7026	1.02336	1.88271	2.35423	0.173526	2.12017	0.900581	1031.51	20.2098	1075.02	15.6133	1165.18	20.2767	1165.18	20.2767	88.5279
Leary 3PS-100-Spot 312	88.0855	18442.2	2.96227	12.6902	1.60658	1.88064	1.84473	0.173166	0.906603	0.491456	1029.53	8.62657	1074.29	12.2293	1167.12	31.8321	1167.12	31.8321	88.2111
Leary 3PS-100-Spot 15	464.003	188219	1.12519	12.6367	0.98796	2.03467	1.57752	0.186558	1.22985	0.779604	1102.7	12.4651	1127.18	10.74	1175.53	19.549	1175.53	19.549	93.805
Leary 3PS-100-Spot 176	121.124	64659.2	3.57222	12.6078	0.81515	2.23099	1.44095	0.204091	1.18822	0.824608	1197.26	12.9831	1190.83	10.1031	1180.05	16.1156	1180.05	16.1156	101.458
Leary 3PS-100-Spot 27	301.996	96777.8	1.44792	12.5699	0.902287	2.18139	1.45864	0.198953	1.14609	0.785722	1169.69	12.2598	1175.12	10.1557	1186.01	17.8235	1186.01	17.8235	98.6246
Leary 3PS-100-Spot 30	119.892	134555	2.29111	12.4137	0.92118	2.25309	1.21914	0.20294	0.798583	0.655037	1191.09	8.68484	1197.75	8.57387	1210.64	18.1331	1210.64	18.1331	98.3851
Leary 3PS-100-Spot 231	116.53	181230	3.91533	12.2204	0.829584	2.40067	1.29749	0.212866	0.997632	0.768894	1244.07	11.2871	1242.8	9.30066	1241.44	16.2753	1241.44	16.2753	100.212
Leary 3PS-100-Spot 146	698.284	543965	2.71415	12.1865	0.812444	2.40124	1.39699	0.212325	1.13645	0.813499	1241.19	12.8307	1242.97	10.0147	1246.91	15.9079	1246.91	15.9079	99.5412
Leary 3PS-100-Spot 171	245.449	93977	5.08364	12.1735	0.903489	2.39418	1.57101	0.211476	1.28522	0.818084	1236.68	14.4625	1240.86	11.2525	1248.97	17.6851	1248.97	17.6851	99.0156
Leary 3PS-100-Spot 271	172.342	106859	4.05424	12.09	0.741068	2.46169	1.51185	0.215946	1.31777	0.871625	1260.42	15.0865	1260.86	10.9169	1262.48	14.4609	1262.48	14.4609	99.8371
Leary 3PS-100-Spot 13	487.153	78918.9	2.29296	12.0179	0.817605	2.29973	1.43206	0.200537	1.17572	0.820999	1178.21	12.6602	1212.21	10.1345	1274.11	15.9302	1274.11	15.9302	92.4729
Leary 3PS-100-Spot 272	274.144	14531.9	1.82277	11.9101	0.80613	2.06684	1.53705	0.178611	1.30869	0.851431	1059.38	12.7848	1137.89	10.5184	1291.67	15.6842	1291.67	15.6842	82.0167
Leary 3PS-100-Spot 98	58.5146	522911	1.54052	11.8172	1.16362	2.20338	2.54459	0.188926	2.26295	0.889316	1115.56	23.181	1182.12	17.7735	1306.88	22.5926	1306.88	22.5926	85.3602
Leary 3PS-100-Spot 221	131.075	78473.9	1.17067	11.7598	1.1044	2.66915	1.63643	0.227751	1.20757	0.737926	1322.7	14.4404	1319.96	12.088	1316.33	21.4141	1316.33	21.4141	100.484
Leary 3PS-100-Spot 128	167.593	123876	2.17696	11.6764	0.796187	2.74528	1.37114	0.232586	1.1163	0.814136	1348.04	13.5789	1340.81	10.2054	1330.12	15.4084	1330.12	15.4084	101.347
Leary 3PS-100-Spot 130	286.655	1.85101e+06	2.53672	11.6705	0.783518	2.68072	1.40208	0.227002	1.16272	0.829284	1318.76	13.8668	1323.15	10.369	1331.1	15.1613	1331.1	15.1613	99.0736
Leary 3PS-100-Spot 86	126.252	84564.2	3.65819	11.6308	0.831803	2.63631	1.46421	0.222481	1.20499	0.822965	1294.97	14.1369	1310.83	10.7791	1337.69	16.0798	1337.69	16.0798	96.8068
Leary 3PS-100-Spot 49	190.704	118708	3.53745	11.4301	0.680118	2.93035	1.2257	0.243029	1.0197	0.83193	1402.42	12.8519	1389.78	9.2793	1371.25	13.0868	1371.25	13.0868	102.273
Leary 3PS-100-Spot 127	132.447	121372	4.5633	11.3961	0.761138	2.86356	1.25599	0.236783	0.99909	0.79546	1369.95	12.3305	1372.38	9.45251	1376.99	14.6342	1376.99	14.6342	99.489
Leary 3PS-100-Spot 283	292.677	240025	1.79962	11.3555	0.733843	2.88675	1.41187	0.23785	1.20617	0.854308	1375.51	14.9404	1378.46	10.6479	1383.84	14.0949	1383.84	14.0949	99.3983
Leary 3PS-100-Spot 206	137.828	115332	2.09917	11.0996	0.965988	3.1622	1.36515	0.254674	0.964619	0.706605	1462.54	12.622	1447.98	10.5315	1427.49	18.444	1427.49	18.444	102.455
Leary 3PS-100-Spot 304	128.318	100457	1.4013	10.9853	0.745642	3.29126	1.13852	0.262338	0.860381	0.755698	1501.79	11.5264	1478.99	8.86667	1447.23	14.1988	1447.23	14.1988	103.77
Leary 3PS-100-Spot 153	45.475	43473.9	1.12031	10.9538	0.706116	3.21687	1.44332	0.255675	1.2588	0.872154	1467.67	16.5229	1461.23	11.1803	1452.69	13.4362	1452.69	13.4362	101.032
Leary 3PS-100-Spot 64	51.9108	7273.96	2.90157	10.9094	3.52482	2.98207	4.25084	0.236051	2.37597	0.558942	1366.13	29.2504	1403.06	32.334	1460.42	67.0195	1460.42	67.0195	93.5436
Leary 3PS-100-Spot 87	113.798	88661.6	1.67693	10.8967	0.788071	2.98629	1.18218	0.236111	0.881184	0.745391	1366.45	10.8504	1404.13	8.99263	1462.63	14.9756	1462.63	14.9756	93.4244
Leary 3PS-100-Spot 21	60.0646	75832.4	0.920065	10.8796	0.90581	3.22807	1.39421	0.254825	1.05988	0.760197	1463.31	13.875	1463.92	10.8088	1465.62	17.2062	1465.62	17.2062	99.8424
Leary 3PS-100-Spot 251	58.8542	298257	1.5636	10.8587	0.782678	3.24919	1.43437	0.256	1.20202	0.838008	1469.35	15.7936	1468.98	11.1373	1469.27	14.8599	1469.27	14.8599	100.005
Leary 3PS-100-Spot 228	45.247	31489.2	1.23561	10.847	0.838893	2.74585	1.90365	0.216109	1.70884	0.897666	1261.28	19.5759	1340.96	14.17	1471.31	15.9228	1471.31	15.9228	85.7251
Leary 3PS-100-Spot 135	249.998	324979	2.40763	10.8327	0.9268	3.24203	1.5432	0.254825	1.2339	0.799572	1463.31	16.1532	1467.27	11.9761	1473.81	17.5856	1473.81	17.5856	99.2878
Leary 3PS-100-Spot 147	152.135	114724	2.12099	10.7384	0.739845	3.45426	1.26796	0.269143	1.02973	0.812119	1536.45	14.0772	1516.84	9.98456	1490.39	14.0069	1490.39	14.0069	103.091
Leary 3PS-100-Spot 224	69.8337	620740	2.66074	10.725	0.803417	3.35946	1.20334	0.261429	0.895852	0.744471	1497.15	11.9687	1495	9.41603	1492.76	15.2057	1492.76	15.2057	100.294
Leary 3PS-100-Spot 299	71.7179	64188.7	1.60236	10.6839	0.707404	3.3048	1.18574	0.256191	0.951606	0.802543	1470.32	12.5108	1482.18	9.2432	1500.01	13.3755	1500.01	13.3755	98.0209
Leary 3PS-100-Spot 35	201.062	656076	2.29984	10.6819	0.863828	3.41125	1.39437	0.264393	1.09456	0.784987	1512.28	14.7546	1506.99	10.949	1500.37	16.3325	1500.37	16.3325	100.794
Leary 3PS-100-Spot 141	219.459	2.38956e+06	2.16847	10.6797	0.708242	3.42106	1.41383	0.265098	1.22365	0.865484	1515.87	16.5295	1509.24	11.1091	1500.76	13.3901	1500.76	13.3901	101.007
Leary 3PS-100-Spot 178	304.572	295180	2.34959	10.6676	0.72942	3.34358	1.25168	0.258801	1.01717	0.812648	1483.71	13.481	1491.29	9.78361	1502.9	13.7865	1502.9	13.7865	98.7228
Leary 3PS-100-Spot 255	277.616	409827	3.8406	10.6582	0.578974	3.28341	1.37356	0.253919	1.24558	0.906823	1458.66	16.2598	1477.13	10.6913	1504.57	10.9405	1504.57	10.9405	96.9484
Leary 3PS-100-Spot 7	26.42	75166.3	0.919262	10.5936	0.818265	3.34587	1.34437	0.257181	1.06666	0.793431	1475.4	14.0666	1491.83	10.5099	1516.05	15.4373	1516.05	15.4373	97.3188
Leary 3PS-100-Spot 134	106.715	70158.2	2.71224	10.4114	0.907399	3.63204	1.44957	0.274378	1.13043	0.77984	1562.99	15.6897	1556.58	11.5416	1548.7	17.0469	1548.7	17.0469	100.923
Leary 3PS-100-Spot 62	75.8806	348292	1.6661	10.2984	0.843141	3.44605	1.68823	0.257501	1.46262	0.866359	1477.05	19.3073	1514.97	13.2872	1569.17	15.7955	1569.17	15.7955	94.1289
Leary 3PS-100-Spot 31	259.622	751725	2.28062	10.1598	0.685844	3.72183	1.31838	0.274366	1.12594	0.854033	1562.93	15.6268	1576.07	10.5519	1594.52	12.8075	1594.52	12.8075	98.0188
Leary 3PS-100-Spot 315	64.5164	28179.3	0.874077	10.0991	0.822789	3.76467	1.51279	0.275865	1.26947	0.839158	1570.5	17.6943	1585.25	12.1373	1605.71	15.3409	1605.71	15.3409	97.8075
Leary 3PS-100-Spot 140	123.261	154492	3.6702	10.0714	0.919995	4.04892	1.48045	0.295882	1.15989	0.78347	1670.85	17.0721	1644.08	12.0555	1610.82	17.1423	1610.82	17.1423	103.727
Leary 3PS-100-Spot 11	152.364	152646	1.4871	10.0544	0.820242	3.77437	1.46863	0.275351	1.21823	0.8295	1567.91	16.9553	1587.31	11.7894	1613.97	15.2771	1613.97	15.2771	97.1458
Leary 3PS-100-Spot 19	190.429	286310	3.37818	10.0425	0.777356	3.78585	1.18711	0.275862	0.897184	0.755774	1570.49	12.5051	1589.75	9.53535	1616.18	14.4741	1616.18	14.4741	97.1729
Leary 3PS-100-Spot 48	123.879	156114	2.69506	10.0012	0.794334	3.81001	3.6295	0.276481	3.54152	0.975757	1573.61	49.4501	1594.86	29.1996	1623.85	14.7757	1623.85	14.7757	96.9066
Leary 3PS-100-Spot 145	85.0902	105646	0.93243	9.98954	0.988989	3.96235	1.43237	0.287201	1.03614	0.723375	1627.53	14.9032	1626.52	11.6137	1626.01	18.3919	1626.01	18.3919	100.093
Leary 3PS-100-Spot 297	42.1435	22613.4	1.93609	9.97908	0.918753	3.98296	1.41517	0.288393	1.07638	0.760603	1633.49	15.5318	1630.73	11.4862	1627.96	17.0813	1627.96	17.0813	100.34
Leary 3PS-100-Spot 44	234.03	69735.5	3.03611	9.96183	0.800138	3.23539	1.5062	0.233859	1.2761	0.847228	1354.69	15.5916	1465.68	11.6833	1631.18	14.8696	1631.18	14.8696	83.05
Leary 3PS-100-Spot 195	234.699	135912	1.3593	9.96098	0.919857	3.83608	1.6035	0.277254	1.31342	0.819096	1577.52	18.379	1600.35	12.9156	1631.33	17.0944	1631.33	17.0944	96.701
Leary 3PS-100-Spot 170	161.792	66622.4	0.718275	9.93709	0.732056	3.78865	2.82931	0.273169	2.73296	0.965947	1556.87	37.801	1590.34	22.7329	1635.8	13.5978	1635.8	13.5978	95.1751
Leary 3PS-100-Spot 166	95.0337	78212.2	1.18903	9.92489	0.953474	3.91529	1.54825	0.281953	1.21983	0.787873	1601.19	17.2951	1616.85	12.523	1638.08	17.7039	1638.08	17.7039	97.7482
Leary 3PS-100-Spot 70	181.119	1.05916e+06	2.48312	9.8991	0.836911	4.03964	1.49936	0.290152	1.24405	0.829721	1642.29	18.0361	1642.21	12.204	1642.91	15.5313	1642.91	15.5313	99.9624
Leary 3PS-100-Spot 186	222.67	2.09202e+06	0.92428	9.89157	0.7862	4.03135	1.49909	0.289337	1.27638	0.85144	1638.21	18.4645	1640.54	12.1968	1644.32	14.5875	1644.32	14.5875	99.6287
Leary 3PS-100-Spot 281	139.727	3.02917e+06	0.732125	9.8556	0.724761	4.09333	1.29189	0.292717	1.06944	0.827811	1655.09	15.6107	1652.98	10.5426	1651.08	13.4341	1651.08	13.4341	100.243
Leary 3PS-100-Spot 20	94.923	275418	2.11464	9.82538	0.716464	3.79354	1.05986	0.270447	0.781016	0.736904	1543.07	10.7178	1591.38	8.51682	1656.77	13.2707	1656.77	13.2707	93.1374
Leary 3PS-100-Spot 161	50.1495	26284.9	1.78693	9.81626	0.659578	4.11294	1.38068	0.292945	1.21294	0.878512	1656.23	17.716	1656.88	11.2777	1658.49	12.2142	1658.49	12.2142	99.8638
Leary 3PS-100-Spot 233	100.281	6.55501e+06	1.69663	9.80664	0.860769	4.32646	1.26378	0.307851	0.925315	0.732182	1730.12	14.0408	1698.42	10.4234	1660.3	15.9368	1660.3	15.9368	104.205
Leary 3PS-100-Spot 234	87.4046	35836.3	2.0958	9.76864	0.880921	4.20392	1.60308	0.297972	1.33935	0.835482	1681.25	19.8209	1674.78	13.1502	1667.49	16.295	1667.49	16.295	100.825
Leary 3PS-100-Spot 66	134.57	81645.6	1.08907	9.74329	0.757448	4.07245	1.59657	0.287905	1.40545	0.880297	1631.05	20.2536	1648.8	13.016	1672.29	14.0022	1672.29	14.0022	97.5339
Leary 3PS-100-Spot 54	457.382	1.68174e+06	1.40125	9.73096	0.789267	4.07315	1.52988	0.28759	1.31057	0.856648	1629.48	18.8702	1648.94	12.4727	1674.63	14.5862	1674.63	14.5862	97.3037
Leary 3PS-100-Spot 109	331.621	783005	17.7492	9.71652	0.805731	3.97732	1.45916	0.280407	1.21653	0.833719	1593.41	17.1744	1629.58	11.8399	1677.37	14.8853	1677.37	14.8853	94.9945
Leary 3PS-100-Spot 308	536.126	75975.4	2.18081	9.48607	0.941007	3.73764	1.60351	0.257259	1.29836	0.809701	1475.81	17.1262	1579.47	12.8457	1721.6	17.2896	1721.6	17.2896	85.7231
Leary 3PS-100-Spot 117	301.514	222835	4.31193	9.45479	0.818183	3.9576	2.13031	0.271501	1.96692	0.923305	1548.42	27.0747	1625.55	17.2693	1727.66	15.0196	1727.66	15.0196	89.625
Leary 3PS-100-Spot 16	258.54	196235	1.60109	9.39458	0.827046	4.53997	1.47682	0.309469	1.22352	0.828481	1738.1	18.6403	1738.32	12.2892	1739.38	15.16	1739.38	15.16	99.926
Leary 3PS-100-Spot 220	254.195	436043	4.3603	9.38587	0.871554	4.5575	1.41192	0.310376	1.11082	0.786743	1742.56	16.9612	1741.53	11.7573	1741.08	15.9726	1741.08	15.9726	100.085
Leary 3PS-100-Spot 274	123.433	1.54904e+06	3.51134	9.36379	0.670034	4.56939	1.2025	0.310455	0.998526	0.830377	1742.94	15.2495	1743.7	10.0179	1745.39	12.2723	1745.39	12.2723	99.8596
Leary 3PS-100-Spot 263	68.214	70300.6	3.11134	9.35257	0.845265	4.48779	1.44396	0.304545	1.1707	0.810759	1713.81	17.618	1728.72	11.9906	1747.59	15.4782	1747.59	15.4782	98.0668
Leary 3PS-100-Spot 73	488.937	392520	4.19966	9.31248	0.726725	4.59633	1.37401	0.310573	1.16609	0.848679	1743.53	17.8138	1748.6	11.459	1755.45	13.296	1755.45	13.296	99.3207
Leary 3PS-100-Spot 242	283.077	285919	0.959581	9.25141	0.841574	4.63688	1.32165	0.311259	1.01907	0.771061	1746.9	15.594	1755.93	11.0395	1767.48	15.3725	1767.48	15.3725	98.8353
Leary 3PS-100-Spot 239	161.727	215619	3.07299	9.23151	0.888636	4.79689	1.35874	0.321307	1.02786	0.756482	1796.11	16.1128	1784.35	11.4169	1771.41	16.2244	1771.41	16.2244	101.394
Leary 3PS-100-Spot 162	205.469	3.08633e+06	2.58307	9.21257	0.975568	4.06698	2.50882	0.271857	2.31138	0.921299	1550.22	31.8489	1647.71	20.4494	1775.16	17.8035	1775.16	17.8035	87.3285
Leary 3PS-100-Spot 149	127.766	63646.3	1.28045	9.14134	0.935526	4.8905	1.52639	0.324377	1.2061	0.790161	1811.07	19.0432	1800.62	12.8683	1789.31	17.0429	1789.31	17.0429	101.216
Leary 3PS-100-Spot 247	63.736	35062.5	2.31776	9.10856	0.814247	4.20459	2.8209	0.277882	2.70083	0.957435	1580.69	37.8609	1674.92	23.1436	1795.86	14.8231	1795.86	14.8231	88.0186
Leary 3PS-100-Spot 57	70.9601	77152.3	1.94744	9.10404	0.897397	4.85273	1.53998	0.320559	1.25148	0.812663	1792.46	19.5837	1794.09	12.9657	1796.76	16.335	1796.76	16.335	99.7605
Leary 3PS-100-Spot 55	391.073	297794	3.84648	9.10318	0.92299	4.82875	1.5645	0.318945	1.26323	0.807434	1784.57	19.6921	1789.92	13.161	1796.93	16.8006	1796.93	16.8006	99.3122
Leary 3PS-100-Spot 68	128.749	251007	2.34608	9.07808	1.08535	4.89538	1.5392	0.322454	1.0914	0.709072	1801.7	17.1551	1801.46	12.9785	1801.96	19.7419	1801.96	19.7419	99.9861
Leary 3PS-100-Spot 277	123.395	60172.6	0.705334	9.06766	0.785992	4.90967	1.25775	0.323025	0.981917	0.780691	1804.48	15.4547	1803.92	10.6104	1804.04	14.2924	1804.04	14.2924	100.024
Leary 3PS-100-Spot 193	350.358	84902.6	2.25132	9.05571	0.937808	3.90186	2.08622	0.256379	1.86355	0.893267	1471.29	24.5145	1614.07	16.8632	1806.44	17.0485	1806.44	17.0485	81.4467
Leary 3PS-100-Spot 1	288.832	432611	1.7756	8.84842	0.918246	4.88981	1.46381	0.313939	1.13999	0.77878	1760.06	17.5586	1800.5	12.3404	1848.43	16.6076	1848.43	16.6076	95.2192
Leary 3PS-100-Spot 306	157.857	111460	0.47622	8.80103	0.825671	5.07408	1.43248	0.324025	1.17059	0.817174	1809.36	18.4674	1831.78	12.1511	1858.13	14.9155	1858.13	14.9155	97.3748
Leary 3PS-100-Spot 286	134.341	111022	2.02229	8.71275	0.959796	5.16096	1.60457	0.326267	1.28586	0.801374	1820.26	20.3919	1846.2	13.6489	1876.33	17.3008	1876.33	17.3008	97.012
Leary 3PS-100-Spot 270	157.462	2.62008e+06	1.19148	8.67728	0.820956	5.44874	1.41735	0.343058	1.15538	0.815172	1901.36	19.0247	1892.56	12.1604	1883.68	14.7847	1883.68	14.7847	100.939
Leary 3PS-100-Spot 241	99.5041	11255.2	1.8172	8.3449	1.86605	5.54142	2.12664	0.335529	1.02003	0.479643	1865.13	16.52	1907.05	18.2945	1953.73	33.3306	1953.73	33.3306	95.4651
Leary 3PS-100-Spot 143	267.767	156032	5.73411	8.27487	1.05073	5.21722	2.66399	0.313248	2.44802	0.91893	1756.67	37.6426	1855.43	22.7027	1968.76	18.7337	1968.76	18.7337	89.2271
Leary 3PS-100-Spot 258	314.739	15773.5	2.62748	8.25484	0.850713	5.07528	1.53517	0.303988	1.2779	0.832417	1711.05	19.2044	1831.98	13.0228	1973.08	15.1594	1973.08	15.1594	86.7199
Leary 3PS-100-Spot 45	123.212	104653	2.05034	8.24144	0.901209	5.94037	1.87507	0.355226	1.64429	0.876925	1959.5	27.7839	1967.16	16.2973	1975.98	16.0539	1975.98	16.0539	99.1663
Leary 3PS-100-Spot 245	131.173	97855.2	0.691859	8.12477	0.743215	5.78815	1.31509	0.341223	1.08494	0.824993	1892.55	17.7936	1944.64	11.3866	2001.34	13.2	2001.34	13.2	94.5644
Leary 3PS-100-Spot 266	235.531	188184	3.01405	7.98978	0.846783	6.27235	1.53903	0.363625	1.28513	0.835029	1999.33	22.0916	2014.6	13.479	2031.04	14.9882	2031.04	14.9882	98.4386
Leary 3PS-100-Spot 191	94.952	73413.7	3.4967	7.93274	0.808089	6.57488	1.2662	0.378442	0.974816	0.769872	2069	17.2525	2055.99	11.16	2043.72	14.2825	2043.72	14.2825	101.237
Leary 3PS-100-Spot 99	60.6214	54754.5	0.937259	7.83721	0.818611	6.93995	1.11418	0.394644	0.755821	0.678367	2144.33	13.7873	2103.78	9.88863	2065.11	14.4331	2065.11	14.4331	103.836
Leary 3PS-100-Spot 279	605.258	161809	3.08831	7.77721	0.660358	6.30815	1.39787	0.35597	1.23206	0.881383	1963.05	20.8505	2019.59	12.2522	2078.64	11.6246	2078.64	11.6246	94.4388
Leary 3PS-100-Spot 244	62.4427	61482.5	0.973505	7.63463	0.794668	6.95879	1.16109	0.385487	0.846537	0.72909	2101.86	15.1835	2106.19	10.3085	2111.16	13.9382	2111.16	13.9382	99.5598
Leary 3PS-100-Spot 268	234.561	466024	5.02727	7.55541	0.749751	6.79763	2.27952	0.372652	2.15269	0.944362	2041.87	37.6745	2085.41	20.1802	2129.44	13.1256	2129.44	13.1256	95.8876
Leary 3PS-100-Spot 210	139.04	499521	2.53849	7.2565	0.710928	7.83664	1.01493	0.412615	0.72433	0.713678	2226.87	13.6388	2212.43	9.13942	2199.82	12.3497	2199.82	12.3497	101.23
Leary 3PS-100-Spot 236	141.661	101228	0.797594	7.0482	0.742523	6.35624	3.33009	0.325062	3.24625	0.974824	1814.4	51.3381	2026.25	29.2247	2250.27	12.8281	2250.27	12.8281	80.6306
Leary 3PS-100-Spot 188	225.156	868690	5.24434	6.74551	0.804914	8.00644	1.43235	0.39187	1.18479	0.827169	2131.49	21.5033	2231.75	12.9297	2325.79	13.7948	2325.79	13.7948	91.6461
Leary 3PS-100-Spot 229	130.773	961209	1.45295	5.90468	1.1459	11.0452	1.97275	0.473216	1.60582	0.814001	2497.65	33.2515	2526.95	18.37	2551.29	19.1916	2551.29	19.1916	97.8975
Leary 3PS-100-Spot 278	163.15	375186	0.660002	5.52152	0.838437	12.0625	1.26776	0.483264	0.95092	0.750076	2541.47	19.9724	2609.28	11.8877	2663.04	13.8939	2663.04	13.8939	95.4347
Leary 3PS-100-Spot 94	370.732	3.03331e+06	1.51051	5.3934	0.675349	13.0857	1.08003	0.512093	0.842833	0.78038	2665.56	18.4006	2685.85	10.1882	2701.87	11.1506	2701.87	11.1506	98.656
Leary 3PS-100-Spot 252	145.255	115715	1.72516	5.34964	1.35628	11.7213	1.94404	0.454976	1.39276	0.716429	2417.34	28.0757	2582.4	18.1897	2715.31	22.3623	2715.31	22.3623	89.0261
Leary 3PS-100-Spot 46	136.456	9.61872e+06	2.76534	5.201	0.988665	13.0683	1.5098	0.493165	1.14106	0.755773	2584.35	24.2949	2684.59	14.2414	2761.67	16.2335	2761.67	16.2335	93.5793
Leary 3PS-100-Spot 218	99.1687	112535	0.494326	5.16163	0.772984	12.426	1.22013	0.465376	0.944036	0.77372	2463.25	19.3269	2637.14	11.4667	2774.14	12.6738	2774.14	12.6738	88.7934
Leary 3PS-100-Spot 37	97.8813	307239	2.41027	5.08197	0.965994	14.3822	1.48068	0.530328	1.12217	0.757874	2742.83	25.069	2775.26	14.058	2799.61	15.8068	2799.61	15.8068	97.972
Leary 3PS-100-Spot 179	72.6389	502802	1.68617	4.93548	0.726712	15.6781	1.3353	0.56145	1.12024	0.838937	2872.62	25.9665	2857.39	12.7462	2847.36	11.8403	2847.36	11.8403	100.887
Leary 3PS-100-Spot 118	193.538	1.67446e+06	1.36522	4.81998	0.689294	15.4916	1.09125	0.541789	0.845989	0.775248	2790.93	19.1641	2845.97	10.4088	2885.87	11.1884	2885.87	11.1884	96.7104
Leary 3PS-100-Spot 197	432.519	197539	15.3245	4.5753	2.89901	14.3141	3.49172	0.475193	1.94625	0.557389	2506.3	40.4151	2770.75	33.151	2970.14	46.7304	2970.14	46.7304	84.3831
Leary 3PS-100-Spot 58	113.193	158334	2.07033	4.51349	0.837242	17.257	1.65465	0.565151	1.4272	0.862537	2887.88	33.2211	2949.23	15.8821	2992.03	13.466	2992.03	13.466	96.5189
Leary 3PS-100-Spot 110	87.1331	264344	2.79238	3.91911	0.849878	21.681	1.46575	0.616531	1.1942	0.814741	3096.1	29.361	3169.55	14.2277	3217.05	13.4182	3217.05	13.4182	96.2402
4PS-186							Isotope ratios						Apparent ages (Ma)
Analysis	U	206Pb	U/Th	206Pb*	±	207Pb*	±	206Pb*	±	error	206Pb*	±	207Pb*	±	206Pb*	±	Best age	±	Conc
	(ppm)	204Pb		207Pb*	(%)	235U*	(%)	238U	(%)	corr.	238U*	(Ma)	235U	(Ma)	207Pb*	(Ma)	(Ma)	(Ma)	(%)
LEARY 4PS-186-Spot 40	519.528	1939.82	0.909781	12.4043	5.16285	0.505768	5.756	0.0455209	2.5449	0.442129	286.964	7.14277	415.599	19.6335	1211.28	101.678	286.964	7.14277	NA
LEARY 4PS-186-Spot 268	640.566	1294.54	1.30007	11.7983	5.3395	0.534877	6.35653	0.0457891	3.44894	0.542582	288.617	9.73469	435.041	22.4958	1309.14	103.705	288.617	9.73469	NA
LEARY 4PS-186-Spot 260	559.775	1686.04	2.09141	11.9382	1.49728	0.550972	2.10427	0.0477262	1.47855	0.702643	300.547	4.34174	445.633	7.59042	1286.23	29.1431	300.547	4.34174	NA
LEARY 4PS-186-Spot 52	384.849	241365	3.32293	18.7055	0.893088	0.363681	1.32631	0.0493604	0.980551	0.73931	310.594	2.97333	314.96	3.59156	347.371	20.1852	310.594	2.97333	NA
LEARY 4PS-186-Spot 143	515.03	258857	0.670675	18.7119	0.832211	0.368119	1.5726	0.0499797	1.33435	0.8485	314.397	4.0945	318.258	4.2965	346.641	18.8006	314.397	4.0945	NA
LEARY 4PS-186-Spot 282	164.766	9246.36	1.26689	18.5977	1.09519	0.373264	1.78824	0.0503691	1.41363	0.790516	316.787	4.36995	322.07	4.93539	360.427	24.694	316.787	4.36995	NA
LEARY 4PS-186-Spot 216	425.571	21324.5	4.04404	18.4293	1.07931	0.39623	1.59881	0.0529839	1.17952	0.737753	332.815	3.82602	338.91	4.60701	380.916	24.2646	332.815	3.82602	NA
LEARY 4PS-186-Spot 210	225.735	41974.2	2.17807	18.4085	0.962761	0.399625	1.62858	0.0533775	1.31352	0.806549	335.224	4.29073	341.376	4.72152	383.457	21.6347	335.224	4.29073	NA
LEARY 4PS-186-Spot 99	160.045	46629.9	1.70055	18.2308	1.33839	0.407771	1.76332	0.05394	1.14804	0.65107	338.666	3.78766	347.269	5.18619	405.204	29.9619	338.666	3.78766	NA
LEARY 4PS-186-Spot 164	527.947	23233.6	2.78128	18.3696	0.905389	0.40618	1.7154	0.0541384	1.45701	0.849369	339.879	4.8238	346.12	5.03127	388.207	20.3283	339.879	4.8238	NA
LEARY 4PS-186-Spot 105	272.072	30331.6	3.3426	18.5617	1.15695	0.403198	1.83796	0.0543029	1.42813	0.77702	340.885	4.74181	343.965	5.36252	364.801	26.0627	340.885	4.74181	NA
LEARY 4PS-186-Spot 27	90.6585	8599	3.89475	17.7873	1.90775	0.422085	2.37983	0.054475	1.4227	0.597818	341.937	4.73799	357.54	7.17227	460.077	42.325	341.937	4.73799	NA
LEARY 4PS-186-Spot 82	200.011	19986.5	19.068	18.5274	0.954789	0.405901	1.65117	0.0545661	1.34712	0.815859	342.494	4.49337	345.919	4.84049	368.968	21.5102	342.494	4.49337	NA
LEARY 4PS-186-Spot 205	591.064	4177.1	3.9803	15.0481	1.65636	0.514333	2.71259	0.0561583	2.14816	0.791923	352.22	7.36326	421.359	9.35512	819.807	34.5988	352.22	7.36326	NA
LEARY 4PS-186-Spot 58	164.523	7040.37	1.4291	19.0066	1.06222	0.416586	1.79624	0.057451	1.44851	0.806411	360.105	5.07314	353.607	5.36365	311.185	24.1672	360.105	5.07314	NA
LEARY 4PS-186-Spot 71	362.303	11715.6	2.12495	18.9472	1.02733	0.431173	1.65567	0.0592766	1.2984	0.784213	371.225	4.68383	364.009	5.06485	318.266	23.3669	371.225	4.68383	NA
LEARY 4PS-186-Spot 29	712.411	25068.1	13.9248	17.0608	1.21856	0.502766	2.13653	0.0622377	1.75495	0.821404	389.22	6.62851	413.573	7.25807	551.811	26.5919	389.22	6.62851	NA
LEARY 4PS-186-Spot 180	39.1345	4328.97	1.96796	18.6195	2.26732	0.462038	2.74422	0.0624214	1.54597	0.563355	390.335	5.8554	385.674	8.80601	357.783	51.176	390.335	5.8554	NA
LEARY 4PS-186-Spot 98	20.8166	2854.63	125802	18.2968	2.09714	0.478435	2.52903	0.0635162	1.41351	0.558912	396.974	5.44198	396.999	8.31026	397.119	47.0176	396.974	5.44198	NA
LEARY 4PS-186-Spot 56	254.48	6122.46	1.94983	18.0491	1.03012	0.493569	2.1082	0.0646387	1.83939	0.872493	403.774	7.19918	407.34	7.07411	427.583	22.9703	403.774	7.19918	94.4318
LEARY 4PS-186-Spot 124	464.174	28198.3	1.04954	18.197	0.962936	0.494829	1.78818	0.0653345	1.50676	0.842624	407.986	5.95688	408.196	6.01048	409.366	21.5407	407.986	5.95688	99.663
LEARY 4PS-186-Spot 28	158.402	98029	1.78439	17.7587	1.00251	0.513702	1.64766	0.0661926	1.30758	0.793596	413.176	5.23309	420.936	5.67771	463.657	22.2246	413.176	5.23309	89.1125
LEARY 4PS-186-Spot 152	276.87	18620.7	1.77891	17.6589	0.942855	0.517478	1.55673	0.0663045	1.23873	0.795721	413.853	4.96541	423.465	5.39036	476.15	20.8602	413.853	4.96541	86.9165
LEARY 4PS-186-Spot 24	103.077	19431.8	1.49022	17.8656	1.18972	0.517481	1.64009	0.0670812	1.12891	0.688326	418.547	4.57491	423.467	5.67901	450.323	26.4246	418.547	4.57491	92.9437
LEARY 4PS-186-Spot 301	291.619	12637.2	2.47968	17.7842	1.04455	0.522591	1.70133	0.067435	1.34292	0.789337	420.684	5.46905	426.881	5.92927	460.457	23.1813	420.684	5.46905	91.3622
LEARY 4PS-186-Spot 288	160.146	10574.8	1.39278	17.8091	0.908755	0.526822	1.39682	0.0680758	1.06079	0.759431	424.553	4.35851	429.698	4.89384	457.389	20.1592	424.553	4.35851	92.821
LEARY 4PS-186-Spot 39	142.813	8448.33	1.27541	17.6395	1.59751	0.532557	2.24125	0.0681616	1.572	0.701393	425.07	6.46655	433.505	7.90822	478.551	35.3104	425.07	6.46655	88.8244
LEARY 4PS-186-Spot 182	133.798	47771.8	1.46409	17.9006	0.929213	0.526537	1.65218	0.0683886	1.36611	0.826854	426.44	5.63714	429.509	5.78646	445.982	20.6756	426.44	5.63714	95.6183
LEARY 4PS-186-Spot 281	77.2852	9681.52	1.29023	18.0117	1.41289	0.524199	1.7452	0.0685076	1.02443	0.587002	427.158	4.23412	427.953	6.09444	432.212	31.4925	427.158	4.23412	98.8308
LEARY 4PS-186-Spot 300	72.9785	5642.83	1.63715	17.3978	1.40728	0.545212	2.02122	0.0688253	1.45082	0.717796	429.075	6.02245	441.855	7.24147	508.961	30.9435	429.075	6.02245	84.3041
LEARY 4PS-186-Spot 254	373.986	84493.1	27.9202	17.749	0.912293	0.535852	1.40529	0.069009	1.06891	0.760631	430.183	4.44819	435.686	4.97846	464.881	20.2215	430.183	4.44819	92.536
LEARY 4PS-186-Spot 45	163.636	19557.2	1.31139	17.8235	1.02217	0.534125	1.6337	0.0690755	1.27441	0.78008	430.583	5.30817	434.544	5.77548	455.579	22.6823	430.583	5.30817	94.5134
LEARY 4PS-186-Spot 46	174.72	19965.2	1.83677	17.3303	1.23356	0.553818	1.78711	0.0696403	1.2931	0.723568	433.988	5.42716	447.495	6.46778	517.507	27.0838	433.988	5.42716	83.8614
LEARY 4PS-186-Spot 248	52.1291	4622.8	0.357853	17.8463	2.128	0.541491	2.69999	0.0701177	1.66179	0.61548	436.865	7.01924	439.407	9.63063	452.728	47.2699	436.865	7.01924	96.4962
LEARY 4PS-186-Spot 166	359.87	44593.9	1.43368	17.7932	1.14102	0.548334	1.67214	0.0707924	1.22234	0.731006	440.928	5.20946	443.904	6.01295	459.385	25.3178	440.928	5.20946	95.9823
LEARY 4PS-186-Spot 142	705.452	37120.4	3.53602	18.033	0.942032	0.543252	1.73287	0.0710814	1.45444	0.839327	442.668	6.22226	440.566	6.1939	429.581	20.9992	442.668	6.22226	103.046
LEARY 4PS-186-Spot 106	383.958	58143.3	15.5791	17.6145	0.64626	0.557036	1.36834	0.0711935	1.20611	0.881441	443.342	5.16748	449.595	4.97065	481.729	14.2893	443.342	5.16748	92.0313
LEARY 4PS-186-Spot 53	132.753	18606.2	2.2223	17.6257	1.09733	0.572197	1.7407	0.073178	1.35125	0.776271	455.274	5.93969	459.434	6.43277	480.274	24.2499	455.274	5.93969	94.7945
LEARY 4PS-186-Spot 230	139.52	67983.9	7.75546	17.1014	0.938764	0.597971	1.38373	0.0741993	1.01658	0.734667	461.406	4.52665	475.945	5.25772	546.621	20.5088	461.406	4.52665	84.4105
LEARY 4PS-186-Spot 171	208.285	19362.3	1.4147	17.3275	1.03867	0.59447	1.65935	0.0747399	1.29406	0.779862	464.649	5.80127	473.718	6.28183	517.865	22.7931	464.649	5.80127	89.724
LEARY 4PS-186-Spot 60	412.424	255133	1.72802	17.4892	0.999205	0.596569	1.33198	0.0757037	0.880774	0.661251	470.428	3.99584	475.054	5.05364	497.435	22.0028	470.428	3.99584	94.5708
LEARY 4PS-186-Spot 147	311.392	74895.1	2.53572	17.0086	0.929976	0.664929	1.59514	0.08206	1.29599	0.812467	508.407	6.3358	517.625	6.46864	558.542	20.279	508.407	6.3358	91.0239
LEARY 4PS-186-Spot 159	183.294	145717	5.23818	16.5861	1.00609	0.722618	1.54405	0.0869643	1.17127	0.758569	537.558	6.04089	552.211	6.57685	613.091	21.737	537.558	6.04089	87.68
LEARY 4PS-186-Spot 250	97.9539	14462.1	2.62009	16.6328	1.28557	0.725607	1.78953	0.0875698	1.24488	0.695648	541.149	6.46167	553.971	7.64077	607.012	27.8024	541.149	6.46167	89.1495
LEARY 4PS-186-Spot 34	129.514	17611.7	2.73302	16.9488	0.953038	0.725692	1.51481	0.089244	1.17744	0.777285	551.064	6.21884	554.021	6.46817	566.215	20.7592	551.064	6.21884	97.3242
LEARY 4PS-186-Spot 274	167.15	12488	4.15683	16.8469	1.17692	0.731868	1.80995	0.0894625	1.37505	0.759719	552.358	7.2789	557.649	7.76644	579.285	25.5596	552.358	7.2789	95.3516
LEARY 4PS-186-Spot 249	96.2888	19646	1.11763	16.2152	1.19305	0.780138	1.89105	0.0917868	1.46721	0.775869	566.096	7.95155	585.562	8.41512	661.758	25.5462	566.096	7.95155	85.5443
LEARY 4PS-186-Spot 313	146.343	28984.4	3.70414	16.4075	1.01096	0.794088	1.57908	0.0945365	1.21304	0.768191	582.311	6.75401	593.488	7.09687	636.471	21.774	582.311	6.75401	91.4905
LEARY 4PS-186-Spot 80	340.19	40898	1.43978	16.0449	0.912248	0.815491	1.53532	0.0949386	1.23491	0.804336	584.679	6.90252	605.53	7.00262	684.379	19.4885	584.679	6.90252	85.432
LEARY 4PS-186-Spot 276	259.8	41990.5	2.37954	16.3605	0.88485	0.822036	1.57361	0.097583	1.30127	0.82693	600.229	7.45799	609.184	7.2089	642.65	19.0229	600.229	7.45799	93.399
LEARY 4PS-186-Spot 148	43.2792	46707.8	2.04257	15.978	1.69505	0.843373	2.16171	0.0977754	1.34156	0.620602	601.359	7.70273	621.005	10.0426	693.265	36.1479	601.359	7.70273	86.7429
LEARY 4PS-186-Spot 303	175.097	24375.6	2.11058	16.7159	1.20418	0.815372	1.84297	0.0988945	1.39517	0.757023	607.927	8.094	605.463	8.40522	596.271	26.0894	607.927	8.094	101.955
LEARY 4PS-186-Spot 145	91.334	5055.73	2.72084	16.7522	1.24967	0.829247	2.03491	0.100796	1.60599	0.789218	619.074	9.47979	613.194	9.36697	591.518	27.0953	619.074	9.47979	104.659
LEARY 4PS-186-Spot 161	421.833	51114.7	12.1876	16.5332	1.0293	0.844713	1.52995	0.101334	1.13193	0.739852	622.221	6.7139	621.743	7.11367	619.987	22.2113	622.221	6.7139	100.36
LEARY 4PS-186-Spot 238	147.32	41351.8	1.84923	16.022	1.30899	0.873355	1.84321	0.10153	1.29768	0.704031	623.369	7.71049	637.387	8.72541	687.388	27.9149	623.369	7.71049	90.6866
LEARY 4PS-186-Spot 126	303.096	29028.5	3.27802	15.1876	0.817903	1.1616	1.52031	0.128007	1.28156	0.842956	776.484	9.37513	782.705	8.29571	800.461	17.1564	776.484	9.37513	97.0045
LEARY 4PS-186-Spot 130	715.842	23402	1.30832	14.1887	0.715656	1.37674	1.9663	0.141736	1.83144	0.931414	854.472	14.6564	879.047	11.5656	941.424	14.6541	854.472	14.6564	90.7638
LEARY 4PS-186-Spot 59	25.3253	2783.12	2.66527	14.4752	1.37903	1.47116	1.8957	0.154515	1.30075	0.686159	926.222	11.2223	918.603	11.4598	900.328	28.4414	900.328	28.4414	102.876
LEARY 4PS-186-Spot 51	78.6233	8591.44	3.68333	14.3553	1.05313	1.51621	1.61758	0.157928	1.22781	0.759036	945.252	10.7951	936.95	9.89746	917.498	21.6817	917.498	21.6817	103.025
LEARY 4PS-186-Spot 155	269.117	89101.8	9.29004	14.2591	0.995174	1.50691	1.37763	0.155907	0.952619	0.691493	933.992	8.28287	933.188	8.40853	931.293	20.4388	931.293	20.4388	100.29
LEARY 4PS-186-Spot 83	65.4246	10918.7	3.91321	14.1861	0.983841	1.48807	1.72089	0.153171	1.41192	0.820459	918.713	12.0896	925.531	10.451	941.814	20.1589	941.814	20.1589	97.5472
LEARY 4PS-186-Spot 264	45.2731	15111.2	3.08406	14.1188	1.27033	1.53505	1.67954	0.157256	1.09869	0.654161	941.509	9.62434	944.523	10.3269	951.565	25.9919	951.565	25.9919	98.9432
LEARY 4PS-186-Spot 201	293.968	55444.2	2.51588	14.076	0.837575	1.59926	1.60925	0.163337	1.3741	0.853877	975.298	12.4371	969.923	10.054	957.746	17.1146	957.746	17.1146	101.833
LEARY 4PS-186-Spot 279	24.2594	15812.7	0.636874	13.8844	1.20635	1.55001	1.73323	0.156153	1.24451	0.718028	935.36	10.8355	950.498	10.6978	985.735	24.5346	985.735	24.5346	94.8896
LEARY 4PS-186-Spot 6	187.743	18310	1.21442	13.8672	0.998765	1.68267	1.60265	0.169308	1.25337	0.782064	1008.3	11.6989	1001.99	10.2074	988.247	20.3077	988.247	20.3077	102.029
LEARY 4PS-186-Spot 222	21.7304	4627.84	1.41879	13.8469	2.60259	1.56921	3.14322	0.15766	1.76249	0.560727	943.762	15.4734	958.115	19.4957	991.206	52.9334	991.206	52.9334	95.2135
LEARY 4PS-186-Spot 294	18.1409	2460.12	2.98663	13.8239	1.40658	1.72789	1.95459	0.173314	1.35718	0.694358	1030.35	12.9234	1018.97	12.5718	994.589	28.5837	994.589	28.5837	103.595
LEARY 4PS-186-Spot 111	196.826	21143.8	2.15611	13.7834	0.895647	1.70221	1.44246	0.170238	1.13071	0.783878	1013.42	10.6036	1009.36	9.22658	1000.54	18.1809	1000.54	18.1809	101.287
LEARY 4PS-186-Spot 312	29.2194	5796.46	3.28255	13.7807	1.23768	1.68384	1.59667	0.168368	1.0087	0.631757	1003.11	9.37051	1002.44	10.1719	1000.93	25.1219	1000.93	25.1219	100.218
LEARY 4PS-186-Spot 252	24.5448	4057.24	2.17754	13.7773	1.3806	1.6553	1.8985	0.165474	1.30317	0.686422	987.125	11.9275	991.58	12.0178	1001.43	28.0259	1001.43	28.0259	98.5716
LEARY 4PS-186-Spot 109	287.545	3.87196e+06	1.55786	13.7745	0.898886	1.64305	1.43848	0.164216	1.12305	0.780718	980.164	10.2117	986.886	9.08014	1001.85	18.2411	1001.85	18.2411	97.8358
LEARY 4PS-186-Spot 19	90.4556	11361.8	373.663	13.7484	1.13661	1.62501	1.67509	0.162104	1.23046	0.734564	968.46	11.0646	979.93	10.5295	1005.7	23.0481	1005.7	23.0481	96.2968
LEARY 4PS-186-Spot 100	128.626	15353.4	3.51211	13.7277	1.07379	1.7775	1.65277	0.177049	1.25644	0.760199	1050.83	12.1831	1037.26	10.7403	1008.76	21.7709	1008.76	21.7709	104.171
LEARY 4PS-186-Spot 129	49.5164	16950.1	2.7114	13.7257	0.974368	1.59073	1.2878	0.158424	0.842036	0.653858	948.011	7.42338	966.583	8.02898	1009.04	19.7597	1009.04	19.7597	93.9516
LEARY 4PS-186-Spot 48	122.354	50910.2	4.03122	13.7177	0.691604	1.78557	1.20594	0.177724	0.987915	0.819207	1054.53	9.61038	1040.21	7.84923	1010.23	14.0237	1010.23	14.0237	104.385
LEARY 4PS-186-Spot 172	252.326	50276.1	4.12673	13.7079	0.689846	1.75861	1.36462	0.174916	1.17741	0.862814	1039.14	11.2998	1030.34	8.83349	1011.68	13.9852	1011.68	13.9852	102.715
LEARY 4PS-186-Spot 43	193.374	21081.3	3.12776	13.7046	1.17198	1.67806	1.71113	0.166864	1.24677	0.728623	994.808	11.4933	1000.25	10.8872	1012.17	23.739	1012.17	23.739	98.2846
LEARY 4PS-186-Spot 262	85.3339	34120.3	1.14591	13.7016	1.02329	1.56534	1.65903	0.15562	1.30585	0.787116	932.391	11.3361	956.581	10.2792	1012.61	20.7424	1012.61	20.7424	92.0777
LEARY 4PS-186-Spot 247	19.5002	3246.63	0.85199	13.6862	1.58911	1.74621	2.08267	0.173408	1.34619	0.646379	1030.86	12.8246	1025.76	13.4474	1014.89	32.2203	1014.89	32.2203	101.573
LEARY 4PS-186-Spot 115	210.704	105725	3.36265	13.6738	0.963298	1.74199	1.69104	0.172831	1.38984	0.821888	1027.69	13.203	1024.2	10.9089	1016.73	19.5147	1016.73	19.5147	101.078
LEARY 4PS-186-Spot 186	478.733	34436.9	1.18896	13.6665	0.97311	1.80901	2.01296	0.179385	1.76212	0.875388	1063.61	17.2777	1048.72	13.1637	1017.81	19.7096	1017.81	19.7096	104.5
LEARY 4PS-186-Spot 120	153.098	15718.2	1.07365	13.6474	1.03982	1.72252	1.50441	0.170569	1.08721	0.722682	1015.25	10.2126	1016.96	9.66501	1020.64	21.0512	1020.64	21.0512	99.4718
LEARY 4PS-186-Spot 7	95.8632	38848.9	3.21467	13.5969	0.795077	1.76006	1.45794	0.173642	1.22207	0.838214	1032.15	11.6556	1030.87	9.44045	1028.14	16.0979	1028.14	16.0979	100.389
LEARY 4PS-186-Spot 138	143.793	345840	4.52693	13.5883	0.840587	1.75361	1.39299	0.172896	1.11078	0.797407	1028.05	10.5553	1028.49	9.00782	1029.43	17.0131	1029.43	17.0131	99.866
LEARY 4PS-186-Spot 118	372.691	929822	1.22007	13.5761	1.04438	1.77854	1.65056	0.175197	1.27813	0.774362	1040.68	12.2831	1037.65	10.7281	1031.24	21.1277	1031.24	21.1277	100.915
LEARY 4PS-186-Spot 73	188.704	25283.8	1.18034	13.5739	0.822434	1.8321	1.61811	0.180443	1.39352	0.8612	1069.4	13.7318	1057.03	10.6291	1031.57	16.6412	1031.57	16.6412	103.667
LEARY 4PS-186-Spot 206	81.132	34300.3	3.72637	13.5418	0.940619	1.77043	1.52739	0.173957	1.20339	0.787874	1033.88	11.4951	1034.68	9.91114	1036.35	19.0176	1036.35	19.0176	99.7612
LEARY 4PS-186-Spot 23	121.064	25545.1	2.11053	13.5334	0.758905	1.74962	1.37205	0.171805	1.14306	0.833104	1022.05	10.8036	1027.02	8.86508	1037.61	15.3438	1037.61	15.3438	98.5005
LEARY 4PS-186-Spot 226	182.228	33286.8	4.06286	13.5319	1.02302	1.73364	1.53158	0.170218	1.13981	0.744203	1013.31	10.6878	1021.1	9.86281	1037.83	20.6767	1037.83	20.6767	97.6378
LEARY 4PS-186-Spot 66	49.8029	3956.55	2.34846	13.5098	1.17178	1.78922	1.67009	0.175388	1.19002	0.712548	1041.73	11.447	1041.54	10.8785	1041.13	23.6678	1041.13	23.6678	100.058
LEARY 4PS-186-Spot 295	364.449	57376.2	3.76008	13.5042	0.83744	1.86843	1.54021	0.183077	1.29265	0.839269	1083.76	12.895	1069.98	10.1873	1041.96	16.9174	1041.96	16.9174	104.012
LEARY 4PS-186-Spot 306	153.864	36954.9	3.32234	13.4822	0.950343	1.7904	1.50984	0.175144	1.17322	0.777054	1040.39	11.2721	1041.97	9.83687	1045.3	19.1871	1045.3	19.1871	99.531
LEARY 4PS-186-Spot 32	376.8	30272.3	1.5927	13.4811	0.94794	1.82172	1.39755	0.178195	1.02692	0.734799	1057.11	10.0123	1053.31	9.16175	1045.45	19.1382	1045.45	19.1382	101.115
LEARY 4PS-186-Spot 204	52.8193	26454	2.69663	13.4519	1.1003	1.78951	1.84243	0.174664	1.4778	0.802093	1037.76	14.1653	1041.65	12.0018	1049.83	22.197	1049.83	22.197	98.8501
LEARY 4PS-186-Spot 187	102.728	28088.7	2.54134	13.4463	1.36998	1.75127	1.91831	0.170862	1.34278	0.699982	1016.86	12.6318	1027.63	12.3991	1050.66	27.6225	1050.66	27.6225	96.7832
LEARY 4PS-186-Spot 255	454.164	146895	8.6915	13.4331	0.798571	1.82453	1.57869	0.177834	1.36181	0.862624	1055.13	13.2546	1054.31	10.3549	1052.64	16.1077	1052.64	16.1077	100.236
LEARY 4PS-186-Spot 173	351.187	94523.4	27.2821	13.4265	1.02362	1.86274	1.62257	0.181469	1.25894	0.775892	1075	12.4653	1067.96	10.7206	1053.64	20.6396	1053.64	20.6396	102.027
LEARY 4PS-186-Spot 47	470.013	2.45512e+06	4.52713	13.4135	0.986732	1.80632	1.85978	0.175803	1.57643	0.847644	1044	15.1944	1047.75	12.1554	1055.59	19.8751	1055.59	19.8751	98.9027
LEARY 4PS-186-Spot 217	263.895	74541.2	1.34589	13.4133	0.783666	1.84683	1.17849	0.179742	0.880179	0.746868	1065.56	8.64474	1062.3	7.76302	1055.62	15.8004	1055.62	15.8004	100.943
LEARY 4PS-186-Spot 198	136.106	430386	4.66817	13.4019	1.02806	1.7358	1.70985	0.168794	1.36627	0.799054	1005.46	12.7196	1021.91	11.0159	1057.32	20.7172	1057.32	20.7172	95.0948
LEARY 4PS-186-Spot 291	664.515	324538	69.4893	13.3976	0.7646	1.84361	1.73908	0.179219	1.56198	0.898166	1062.71	15.3033	1061.15	11.449	1057.97	15.4113	1057.97	15.4113	100.448
LEARY 4PS-186-Spot 11	197.802	297661	1.47916	13.3896	0.875923	1.80161	1.70243	0.175032	1.4598	0.857482	1039.77	14.0178	1046.04	11.1165	1059.18	17.641	1059.18	17.641	98.1683
LEARY 4PS-186-Spot 77	505.187	104704	6.71234	13.3888	0.936137	1.90248	1.75322	0.184821	1.48237	0.845514	1093.26	14.9065	1081.96	11.6691	1059.29	18.8614	1059.29	18.8614	103.206
LEARY 4PS-186-Spot 125	104.603	21864.3	3.2172	13.383	0.902249	1.76266	1.3291	0.171163	0.97594	0.734285	1018.52	9.19463	1031.83	8.61072	1060.16	18.1731	1060.16	18.1731	96.0715
LEARY 4PS-186-Spot 134	26.5794	3870.84	1.26551	13.3656	1.53795	1.82223	2.00537	0.176718	1.28694	0.641748	1049.02	12.459	1053.49	13.148	1062.78	30.9472	1062.78	30.9472	98.7048
LEARY 4PS-186-Spot 2	73.2718	369492	2.01537	13.3647	1.31399	1.48775	1.93999	0.144271	1.42723	0.73569	868.766	11.6001	925.399	11.7807	1062.92	26.4335	1062.92	26.4335	81.734
LEARY 4PS-186-Spot 93	64.3028	20274.6	1.79606	13.3392	0.821043	1.73538	1.48172	0.167962	1.23344	0.83244	1000.87	11.4346	1021.75	9.54521	1066.77	16.4893	1066.77	16.4893	93.8228
LEARY 4PS-186-Spot 265	56.2545	14419.1	2.03346	13.331	0.988478	1.92952	1.75045	0.186638	1.44464	0.825296	1103.14	14.6474	1091.37	11.7071	1067.99	19.8537	1067.99	19.8537	103.291
LEARY 4PS-186-Spot 286	86.2882	24768.2	3.69185	13.3137	0.932863	1.7209	1.52468	0.166243	1.206	0.790982	991.376	11.082	1016.36	9.79189	1070.61	18.7254	1070.61	18.7254	92.5994
LEARY 4PS-186-Spot 116	212.915	33924.1	1.86313	13.3091	0.879816	1.86793	1.54596	0.180384	1.27119	0.822264	1069.07	12.5229	1069.8	10.2243	1071.3	17.6575	1071.3	17.6575	99.7921
LEARY 4PS-186-Spot 137	265.545	151204	3.90598	13.2971	1.05763	1.79868	1.65604	0.173541	1.27432	0.769497	1031.59	12.1479	1044.98	10.8074	1073.11	21.2245	1073.11	21.2245	96.1311
LEARY 4PS-186-Spot 8	44.0673	70017	1.06188	13.2817	1.4601	1.85275	1.78602	0.178549	1.02859	0.57591	1059.04	10.0455	1064.41	11.7785	1075.44	29.3067	1075.44	29.3067	98.4755
LEARY 4PS-186-Spot 156	63.6691	26974.5	2.33815	13.2784	0.98434	1.82575	1.76311	0.175903	1.46275	0.829641	1044.56	14.1056	1054.75	11.5674	1075.91	19.7439	1075.91	19.7439	97.0855
LEARY 4PS-186-Spot 1	172.168	660236	1.34428	13.2754	0.888012	1.77688	1.64705	0.171157	1.38716	0.842208	1018.48	13.0685	1037.04	10.7017	1076.39	17.8284	1076.39	17.8284	94.6203
LEARY 4PS-186-Spot 9	72.4005	24248	2.14641	13.2547	1.16571	1.88801	1.6513	0.181577	1.16959	0.708281	1075.59	11.5864	1076.88	10.9617	1079.53	23.3926	1079.53	23.3926	99.6348
LEARY 4PS-186-Spot 133	103.125	15236.9	2.56553	13.2473	1.11244	1.77125	1.70407	0.170253	1.29086	0.757517	1013.51	12.1064	1034.98	11.0596	1080.6	22.3191	1080.6	22.3191	93.7907
LEARY 4PS-186-Spot 314	393.46	160496	8.36144	13.2385	0.924124	1.9385	1.44851	0.186205	1.11543	0.770052	1100.78	11.2874	1094.48	9.70299	1081.98	18.5188	1081.98	18.5188	101.738
LEARY 4PS-186-Spot 117	63.3215	34920.7	1.02444	13.2297	1.01908	1.82482	1.64767	0.175169	1.29472	0.785786	1040.53	12.4408	1054.42	10.808	1083.28	20.4293	1083.28	20.4293	96.053
LEARY 4PS-186-Spot 283	126.294	38409	4.30696	13.2167	0.924729	1.84533	1.56572	0.176964	1.26347	0.806959	1050.37	12.2463	1061.77	10.311	1085.25	18.5248	1085.25	18.5248	96.7855
LEARY 4PS-186-Spot 233	192.322	66737.7	4.51312	13.2028	0.64961	1.86968	1.43407	0.179111	1.2785	0.891519	1062.12	12.5195	1070.42	9.4874	1087.37	13.0193	1087.37	13.0193	97.6779
LEARY 4PS-186-Spot 87	27.443	14326.2	1.58216	13.1729	1.44693	1.86594	1.91175	0.178347	1.24947	0.653575	1057.94	12.191	1069.09	12.639	1091.93	28.9697	1091.93	28.9697	96.8866
LEARY 4PS-186-Spot 219	347.268	398818	0.890987	13.1718	0.847573	1.9435	1.53976	0.185745	1.28548	0.834862	1098.28	12.9811	1096.21	10.3233	1092.11	16.9608	1092.11	16.9608	100.565
LEARY 4PS-186-Spot 244	145.648	73651.2	3.47783	13.1595	1.07764	1.86579	1.68479	0.178152	1.29507	0.768686	1056.87	12.6242	1069.04	11.1381	1093.96	21.5776	1093.96	21.5776	96.6094
LEARY 4PS-186-Spot 33	215.103	47321.9	4.28795	13.1055	0.848044	2.04506	1.64714	0.194469	1.41205	0.857274	1145.54	14.8198	1130.65	11.2328	1102.16	16.9785	1102.16	16.9785	103.936
LEARY 4PS-186-Spot 190	91.3059	29789.9	2.1568	13.0656	1.01076	1.85182	1.85332	0.175556	1.55343	0.838191	1042.65	14.9549	1064.08	12.2202	1108.26	20.1966	1108.26	20.1966	94.0804
LEARY 4PS-186-Spot 103	154.568	3.01569e+06	1.84569	13.0618	0.957696	1.91579	1.54919	0.181567	1.2177	0.786027	1075.53	12.0625	1086.6	10.3357	1108.85	19.1435	1108.85	19.1435	96.9952
LEARY 4PS-186-Spot 30	74.0451	188580	2.13246	13.0011	1.05476	1.88821	1.91441	0.178122	1.59764	0.834533	1056.71	15.5713	1076.95	12.709	1118.18	21.0609	1118.18	21.0609	94.5027
LEARY 4PS-186-Spot 212	575.286	29037.2	3.75204	12.9717	0.901925	2.00513	1.49491	0.188724	1.19218	0.797491	1114.46	12.2013	1117.25	10.1284	1122.68	17.9756	1122.68	17.9756	99.2675
LEARY 4PS-186-Spot 289	79.8358	43689.1	3.01268	12.9605	1.28014	1.85376	1.82621	0.174327	1.30241	0.713179	1035.91	12.4636	1064.77	12.0458	1124.37	25.5177	1124.37	25.5177	92.132
LEARY 4PS-186-Spot 293	345.459	259695	25.4224	12.9476	0.861566	1.90141	1.48011	0.178629	1.2035	0.813119	1059.48	11.7582	1081.58	9.84925	1126.37	17.187	1126.37	17.187	94.0614
LEARY 4PS-186-Spot 307	254.939	51737.4	3.9671	12.9299	1.00992	2.1104	1.69456	0.197993	1.36073	0.803001	1164.53	14.4973	1152.21	11.6749	1129.09	20.1173	1129.09	20.1173	103.138
LEARY 4PS-186-Spot 207	9.82246	2774.14	6.22695	12.9039	1.61492	2.13126	2.01874	0.199547	1.21134	0.600046	1172.89	12.9901	1158.99	13.9526	1133.1	32.1415	1133.1	32.1415	103.511
LEARY 4PS-186-Spot 234	44.5133	13967.4	1.77197	12.892	1.12437	1.94193	1.97697	0.181652	1.6261	0.822522	1076	16.1146	1095.67	13.2513	1134.97	22.3772	1134.97	22.3772	94.8038
LEARY 4PS-186-Spot 16	25.4015	14925.6	1.24958	12.8563	1.12127	1.86783	1.60307	0.174238	1.14569	0.714684	1035.42	10.959	1069.76	10.6019	1140.48	22.2785	1140.48	22.2785	90.7877
LEARY 4PS-186-Spot 280	20.8593	17499	3.47748	12.8475	1.71431	1.84989	2.1792	0.172446	1.34538	0.617375	1025.57	12.7563	1063.39	14.3639	1141.81	34.1038	1141.81	34.1038	89.8202
LEARY 4PS-186-Spot 193	56.938	11161.1	1.92616	12.838	1.14188	1.9589	1.76823	0.182472	1.35009	0.763525	1080.47	13.4303	1101.5	11.8869	1143.32	22.6899	1143.32	22.6899	94.5026
LEARY 4PS-186-Spot 150	98.742	28096.6	3.3122	12.8243	1.21844	2.05837	1.86383	0.191534	1.41041	0.756729	1129.68	14.6152	1135.08	12.7377	1145.43	24.2178	1145.43	24.2178	98.6247
LEARY 4PS-186-Spot 208	230.83	31782.2	4.30048	12.7672	1.05729	2.07061	1.62587	0.191814	1.23515	0.759686	1131.2	12.8148	1139.13	11.1329	1154.27	21.0014	1154.27	21.0014	98.001
LEARY 4PS-186-Spot 237	224.347	36537.9	3.26623	12.7482	0.937547	2.02188	1.66332	0.187021	1.37391	0.826007	1105.22	13.9543	1122.89	11.3006	1157.23	18.6176	1157.23	18.6176	95.5055
LEARY 4PS-186-Spot 76	234.401	157170	3.27253	12.7375	0.815935	2.21104	1.45509	0.204348	1.2048	0.827988	1198.63	13.178	1184.54	10.1738	1158.88	16.1814	1158.88	16.1814	103.43
LEARY 4PS-186-Spot 177	166.971	6709.43	1.36388	12.6996	0.960588	1.71348	1.60332	0.157891	1.28371	0.800657	945.045	11.2843	1013.59	10.2806	1164.79	19.0485	1164.79	19.0485	81.1346
LEARY 4PS-186-Spot 26	132.09	37812.7	2.80136	12.6875	0.83263	2.1042	1.37978	0.19371	1.10024	0.797401	1141.44	11.5096	1150.18	9.4971	1166.68	16.5125	1166.68	16.5125	97.8365
LEARY 4PS-186-Spot 14	198.693	31445.9	8.50154	12.6804	0.91965	2.18265	1.65283	0.20082	1.37335	0.830909	1179.72	14.8057	1175.52	11.5099	1167.78	18.2336	1167.78	18.2336	101.022
LEARY 4PS-186-Spot 162	135.494	19568.2	3.48012	12.6515	1.0061	2.15033	1.68658	0.197394	1.35364	0.802591	1161.31	14.3853	1165.16	11.6898	1172.34	19.9192	1172.34	19.9192	99.0585
LEARY 4PS-186-Spot 236	107.251	36857.7	9.58942	12.5771	0.918633	1.98182	1.84519	0.180855	1.60026	0.867262	1071.64	15.7995	1109.34	12.453	1184.01	18.1521	1184.01	18.1521	90.5094
LEARY 4PS-186-Spot 62	151.836	65542.5	3.96915	12.5723	0.855606	2.12493	1.44836	0.193841	1.16862	0.80686	1142.15	12.2318	1156.94	10.0005	1184.77	16.9044	1184.77	16.9044	96.403
LEARY 4PS-186-Spot 5	214.239	38357.6	3.22259	12.5281	0.714205	2.16509	1.38855	0.196811	1.19079	0.857578	1158.16	12.6234	1169.9	9.64479	1191.68	14.0972	1191.68	14.0972	97.1876
LEARY 4PS-186-Spot 22	73.5638	22989.7	3.56735	12.452	0.977995	2.19973	1.73139	0.198745	1.42871	0.825185	1168.57	15.2698	1180.96	12.0865	1203.7	19.2512	1203.7	19.2512	97.0823
LEARY 4PS-186-Spot 158	181.168	18108.1	1.31521	12.45	0.998942	1.98938	1.60905	0.179712	1.2614	0.783946	1065.4	12.3872	1111.91	10.873	1204.04	19.6626	1204.04	19.6626	88.4851
LEARY 4PS-186-Spot 290	92.0587	20135.9	1.9323	12.3859	0.804893	2.26285	1.43043	0.203363	1.18249	0.826667	1193.36	12.8822	1200.79	10.0733	1214.18	15.8444	1214.18	15.8444	98.2854
LEARY 4PS-186-Spot 20	155.579	83906.1	3.32139	12.3286	0.909415	2.31536	1.6391	0.207119	1.36367	0.831966	1213.45	15.0834	1217	11.6236	1223.29	17.8603	1223.29	17.8603	99.1953
LEARY 4PS-186-Spot 259	114.757	15441.8	1.94866	12.2802	0.977959	2.30212	1.64945	0.205126	1.32826	0.805275	1202.8	14.5743	1212.94	11.6767	1231.05	19.1942	1231.05	19.1942	97.7046
LEARY 4PS-186-Spot 189	336.849	165547	2.80416	12.1627	0.974694	2.48264	1.85029	0.219095	1.57275	0.850002	1277.09	18.2211	1266.99	13.3937	1249.86	19.073	1249.86	19.073	102.179
LEARY 4PS-186-Spot 194	33.8603	13445.1	2.52285	12.157	1.08239	2.27433	1.92783	0.200616	1.5953	0.827508	1178.63	17.1839	1204.36	13.5974	1250.78	21.1637	1250.78	21.1637	94.2316
LEARY 4PS-186-Spot 269	136.217	31046.2	3.02403	12.129	0.805524	2.39787	1.32927	0.211026	1.05739	0.795471	1234.28	11.8779	1241.96	9.52518	1255.33	15.7545	1255.33	15.7545	98.3237
LEARY 4PS-186-Spot 122	160.451	31930.5	3.54083	12.0844	1.12082	2.2447	1.69182	0.196821	1.26729	0.749068	1158.22	13.435	1195.13	11.8847	1262.49	21.9	1262.49	21.9	91.7412
LEARY 4PS-186-Spot 37	288.469	36902.5	2.85321	12.0781	0.933512	2.43267	1.76002	0.213191	1.49206	0.847749	1245.8	16.9023	1252.31	12.6655	1263.51	18.2271	1263.51	18.2271	98.598
LEARY 4PS-186-Spot 195	52.6522	7936.43	1.37527	11.8887	1.22999	2.69375	1.93666	0.23237	1.49592	0.772425	1346.91	18.1831	1326.74	14.3417	1294.31	23.9059	1294.31	23.9059	104.064
LEARY 4PS-186-Spot 170	313.472	137925	1.6961	11.7253	0.950715	2.6039	1.52836	0.221531	1.19667	0.782977	1289.96	13.9902	1301.74	11.213	1321.19	18.4217	1321.19	18.4217	97.6365
LEARY 4PS-186-Spot 15	173.974	92179.5	1.80516	11.6896	0.8395	2.6421	1.33922	0.224097	1.04343	0.779134	1303.49	12.3141	1312.44	9.86491	1327.09	16.2532	1327.09	16.2532	98.2214
LEARY 4PS-186-Spot 308	36.5354	12531.5	2.10939	11.6274	1.44214	2.57522	1.75014	0.217262	0.991586	0.566574	1267.39	11.409	1293.62	12.8008	1337.41	27.881	1337.41	27.881	94.7648
LEARY 4PS-186-Spot 153	278.832	31827.9	7.29428	11.6254	1.03723	2.67196	1.70371	0.225386	1.35159	0.793322	1310.27	16.0258	1320.73	12.5887	1337.73	20.0504	1337.73	20.0504	97.9473
LEARY 4PS-186-Spot 284	42.2278	8470.93	2.6881	11.6056	1.07015	2.66656	1.46861	0.224547	1.00578	0.684854	1305.86	11.8893	1319.24	10.8454	1341.04	20.6789	1341.04	20.6789	97.3767
LEARY 4PS-186-Spot 310	92.6239	24950.2	2.74479	11.5483	0.802902	2.76259	1.39147	0.231484	1.13645	0.816731	1342.27	13.7709	1345.49	10.374	1350.6	15.4942	1350.6	15.4942	99.3836
LEARY 4PS-186-Spot 256	79.9892	12001.1	1.93126	11.5118	0.809825	2.74956	1.36741	0.229664	1.10181	0.805766	1332.74	13.2658	1341.97	10.1818	1356.7	15.6134	1356.7	15.6134	98.2341
LEARY 4PS-186-Spot 68	221.476	39653.1	2.97307	11.4878	0.877492	2.90105	1.63779	0.241812	1.38288	0.844358	1396.11	17.3591	1382.19	12.3675	1360.73	16.9087	1360.73	16.9087	102.601
LEARY 4PS-186-Spot 235	60.8611	26864.4	2.51404	11.4778	1.14201	2.5513	1.61129	0.212476	1.13669	0.705455	1241.99	12.841	1286.81	11.7543	1362.39	22.0006	1362.39	22.0006	91.1627
LEARY 4PS-186-Spot 57	49.74	10762.9	3.11681	11.4585	1.17757	2.87826	1.86195	0.239302	1.44229	0.774611	1383.07	17.9532	1376.24	14.032	1365.64	22.6756	1365.64	22.6756	101.277
LEARY 4PS-186-Spot 74	31.1421	3234.92	1.64275	11.4449	1.13771	2.98902	1.8954	0.248215	1.51597	0.799815	1429.26	19.4333	1404.83	14.4219	1367.93	21.9012	1367.93	21.9012	104.483
LEARY 4PS-186-Spot 123	193.493	122327	3.48002	11.4032	0.855122	2.89455	1.34778	0.239494	1.04176	0.772948	1384.07	12.9759	1380.49	10.1715	1374.95	16.4458	1374.95	16.4458	100.663
LEARY 4PS-186-Spot 67	212.214	102845	3.52904	11.3591	0.948271	2.89151	1.4608	0.238317	1.11118	0.760665	1377.94	13.7856	1379.7	11.0216	1382.4	18.2171	1382.4	18.2171	99.6774
LEARY 4PS-186-Spot 183	117.908	20925	3.99589	11.317	0.91065	2.86296	1.41377	0.235091	1.08142	0.764919	1361.13	13.2694	1372.22	10.6395	1389.52	17.4774	1389.52	17.4774	97.9566
LEARY 4PS-186-Spot 90	106.847	31679.1	4.78249	11.2944	0.940191	2.97283	1.81039	0.243624	1.54711	0.854573	1405.51	19.5376	1400.7	13.7562	1393.37	18.0349	1393.37	18.0349	100.871
LEARY 4PS-186-Spot 261	89.6197	45952.5	3.10101	11.2447	0.877515	2.93395	1.38109	0.239379	1.06648	0.7722	1383.47	13.2786	1390.71	10.459	1401.82	16.8132	1401.82	16.8132	98.6907
LEARY 4PS-186-Spot 70	322.532	46698.2	4.02019	11.2412	0.647745	2.9823	1.2435	0.24325	1.06147	0.853614	1403.57	13.3881	1403.12	9.45593	1402.41	12.4097	1402.41	12.4097	100.083
LEARY 4PS-186-Spot 17	15.8412	4696.36	1.89552	11.22	1.02909	3.12419	1.59963	0.254343	1.22465	0.765587	1460.83	16.008	1438.67	12.3046	1406.02	19.7063	1406.02	19.7063	103.898
LEARY 4PS-186-Spot 228	186.912	34096.4	3.13911	11.1638	0.789643	3.0093	1.33686	0.243762	1.07873	0.806913	1406.23	13.6289	1409.98	10.1889	1415.63	15.1011	1415.63	15.1011	99.3355
LEARY 4PS-186-Spot 242	113.788	18170.6	0.769998	11.0828	0.853227	2.98254	1.4067	0.239841	1.11839	0.795049	1385.87	13.9467	1403.18	10.6973	1429.55	16.2864	1429.55	16.2864	96.9445
LEARY 4PS-186-Spot 160	315.822	63870.8	5.96429	11.0278	0.79448	2.97407	1.41638	0.237974	1.17258	0.827868	1376.15	14.5304	1401.02	10.7632	1439.04	15.1455	1439.04	15.1455	95.6301
LEARY 4PS-186-Spot 267	236.702	192952	10.5244	10.9001	0.904217	3.10584	1.30283	0.245638	0.937958	0.719937	1415.94	11.9236	1434.14	10.0071	1461.22	17.1861	1461.22	17.1861	96.9016
LEARY 4PS-186-Spot 131	178.908	54837.3	1.58026	10.8791	0.8611	3.17572	1.62501	0.250682	1.3781	0.848058	1441.99	17.8065	1451.27	12.5493	1464.87	16.3585	1464.87	16.3585	98.438
LEARY 4PS-186-Spot 185	111.774	39532.1	0.953325	10.8593	0.889812	3.23574	1.42909	0.254955	1.11827	0.782505	1463.98	14.6454	1465.76	11.0854	1468.34	16.8961	1468.34	16.8961	99.7032
LEARY 4PS-186-Spot 128	209.032	39126	4.17173	10.8496	0.832623	3.26378	1.4561	0.256935	1.19455	0.82038	1474.14	15.7411	1472.46	11.3179	1470.03	15.8066	1470.03	15.8066	100.28
LEARY 4PS-186-Spot 95	75.1181	22756.2	1.09025	10.8479	0.961475	3.33753	1.44287	0.2627	1.07584	0.745626	1503.64	14.4287	1489.88	11.2734	1470.32	18.2521	1470.32	18.2521	102.266
LEARY 4PS-186-Spot 196	190.948	114453	3.64879	10.7481	0.785295	3.29333	1.57252	0.256834	1.3624	0.866379	1473.62	17.9472	1479.48	12.2486	1487.86	14.8725	1487.86	14.8725	99.0429
LEARY 4PS-186-Spot 18	136.279	35220.2	1.30557	10.7464	1.22931	3.04027	2.1272	0.237062	1.73603	0.816108	1371.4	21.446	1417.79	16.2546	1488.16	23.2811	1488.16	23.2811	92.1542
LEARY 4PS-186-Spot 315	200.045	69529.8	2.40099	10.7308	0.924278	3.35232	1.62216	0.261015	1.33308	0.821795	1495.03	17.7878	1493.33	12.6873	1490.9	17.4976	1490.9	17.4976	100.277
LEARY 4PS-186-Spot 63	464.037	170756	2.01387	10.7242	0.815142	3.47995	1.662	0.270786	1.44837	0.871464	1544.79	19.8954	1522.68	13.1095	1492.07	15.4291	1492.07	15.4291	103.533
LEARY 4PS-186-Spot 302	89.9685	627443	4.17208	10.6	0.944011	3.51088	1.43982	0.270027	1.08716	0.755068	1540.94	14.9007	1529.67	11.3792	1514.09	17.8145	1514.09	17.8145	101.773
LEARY 4PS-186-Spot 304	145.808	127027	2.29616	10.5785	0.974305	3.4052	1.61488	0.261369	1.28786	0.797493	1496.84	17.2028	1505.6	12.6756	1517.91	18.377	1517.91	18.377	98.6118
LEARY 4PS-186-Spot 12	28.2162	5998.61	4.15655	10.5473	1.13525	3.31597	1.70158	0.25377	1.26751	0.744903	1457.89	16.5384	1484.82	13.2751	1523.48	21.3972	1523.48	21.3972	95.6949
LEARY 4PS-186-Spot 178	36.9255	5679.48	0.765571	10.5128	1.25751	3.47659	1.82926	0.265192	1.32848	0.726239	1516.35	17.9506	1521.92	14.4258	1529.65	23.6826	1529.65	23.6826	99.1303
LEARY 4PS-186-Spot 199	19.6193	5437.79	1.22526	10.4846	1.1556	3.35248	2.05994	0.255038	1.70527	0.827825	1464.4	22.3389	1493.37	16.112	1534.72	21.7485	1534.72	21.7485	95.4183
LEARY 4PS-186-Spot 299	63.3832	25543.9	3.44897	10.4682	0.838883	3.38267	1.65068	0.256932	1.42162	0.861236	1474.13	18.7331	1500.39	12.9371	1537.66	15.7827	1537.66	15.7827	95.868
LEARY 4PS-186-Spot 174	50.6735	17957.9	2.06292	10.4589	1.20877	3.46747	1.95162	0.263139	1.53222	0.7851	1505.88	20.5767	1519.85	15.3819	1539.33	22.7356	1539.33	22.7356	97.8269
LEARY 4PS-186-Spot 65	36.0543	9138.68	1.27837	10.2756	1.19325	3.57597	1.95308	0.266617	1.54617	0.791661	1523.61	20.9807	1544.21	15.4986	1572.52	22.3459	1572.52	22.3459	96.8893
LEARY 4PS-186-Spot 273	50.8679	66057.3	3.41712	10.2694	1.03248	3.46043	1.50246	0.257848	1.0915	0.726476	1478.82	14.4238	1518.25	11.836	1573.64	19.3319	1573.64	19.3319	93.9747
LEARY 4PS-186-Spot 139	88.4353	2902.06	2.04563	10.2094	1.97806	3.13055	2.51452	0.231904	1.55246	0.617397	1344.47	18.8396	1440.23	19.3531	1584.61	36.9861	1584.61	36.9861	84.8456
LEARY 4PS-186-Spot 104	219.029	62235.7	4.56519	10.0871	0.938517	3.80307	1.70328	0.278348	1.42139	0.834501	1583.04	19.9513	1593.39	13.6949	1607.11	17.4959	1607.11	17.4959	98.5022
LEARY 4PS-186-Spot 55	411.88	3.07317e+06	5.97567	10.086	0.893453	3.95182	1.48292	0.289202	1.18355	0.798122	1637.54	17.1154	1624.36	12.0171	1607.32	16.6552	1607.32	16.6552	101.88
LEARY 4PS-186-Spot 69	89.7871	67991.3	1.67389	10.0704	0.919577	3.86756	1.65891	0.282599	1.38071	0.8323	1604.44	19.6111	1606.94	13.3845	1610.2	17.1359	1610.2	17.1359	99.6422
LEARY 4PS-186-Spot 10	231.703	87170.2	3.21727	10.0562	0.724526	3.93285	1.30302	0.286965	1.08301	0.831158	1626.35	15.5674	1620.47	10.5489	1612.82	13.4962	1612.82	13.4962	100.838
LEARY 4PS-186-Spot 61	45.1059	224714	1.82195	10.0308	1.13589	3.78651	1.91639	0.27559	1.54346	0.805404	1569.11	21.4965	1589.89	15.3945	1617.54	21.1474	1617.54	21.1474	97.0063
LEARY 4PS-186-Spot 89	179.69	84493.4	1.38512	10.0219	0.927552	3.71306	1.87576	0.270005	1.63037	0.86918	1540.83	22.3446	1574.19	15.0061	1619.18	17.2645	1619.18	17.2645	95.1608
LEARY 4PS-186-Spot 311	324.696	174299	3.54845	10.018	0.861932	3.76125	1.36642	0.2734	1.06028	0.77595	1558.04	14.6748	1584.52	10.9608	1619.92	16.0414	1619.92	16.0414	96.1799
LEARY 4PS-186-Spot 176	155.705	223338	3.80812	10.0156	0.790493	4.00804	1.68435	0.29127	1.48734	0.883031	1647.87	21.6276	1635.83	13.6884	1620.36	14.7108	1620.36	14.7108	101.698
LEARY 4PS-186-Spot 50	92.5949	26743.5	1.66475	9.90541	0.941955	4.08109	1.48512	0.293316	1.14818	0.773119	1658.08	16.7864	1650.53	12.1124	1640.92	17.4852	1640.92	17.4852	101.046
LEARY 4PS-186-Spot 132	71.9123	30381	3.41104	9.89337	0.816612	4.08836	1.45752	0.293482	1.20727	0.828306	1658.9	17.6581	1651.98	11.8914	1643.17	15.154	1643.17	15.154	100.957
LEARY 4PS-186-Spot 31	125.796	17383.7	2.35662	9.88688	0.865149	3.97725	1.64791	0.285318	1.40255	0.851105	1618.09	20.0704	1629.57	13.3716	1644.39	16.0523	1644.39	16.0523	98.4006
LEARY 4PS-186-Spot 220	131.63	39872.6	1.74416	9.88056	0.953863	4.01251	1.69943	0.287664	1.40649	0.827623	1629.84	20.2553	1636.73	13.814	1645.58	17.6957	1645.58	17.6957	99.044
LEARY 4PS-186-Spot 184	252.103	52273	2.06686	9.87902	0.889324	4.03043	1.41701	0.288904	1.10318	0.77853	1636.05	15.9404	1640.36	11.5283	1645.87	16.4977	1645.87	16.4977	99.4034
LEARY 4PS-186-Spot 239	165.825	195242	4.43604	9.86878	0.913675	4.00025	1.60282	0.286443	1.3169	0.821615	1623.73	18.9025	1634.25	13.0207	1647.79	16.9436	1647.79	16.9436	98.5398
LEARY 4PS-186-Spot 241	337.881	68749.2	1.92849	9.85987	0.773976	3.94541	1.293	0.282261	1.03577	0.801057	1602.74	14.6979	1623.05	10.4745	1649.47	14.3495	1649.47	14.3495	97.1672
LEARY 4PS-186-Spot 136	119.169	39225.7	1.5774	9.84171	1.04498	4.06385	1.7735	0.290199	1.43294	0.807975	1642.52	20.7773	1647.08	14.4526	1652.88	19.3662	1652.88	19.3662	99.3733
LEARY 4PS-186-Spot 257	231.32	79730.4	2.14582	9.84126	0.840393	4.14352	1.78155	0.295875	1.57088	0.881748	1670.82	23.121	1662.93	14.5736	1652.97	15.5741	1652.97	15.5741	101.08
LEARY 4PS-186-Spot 54	97.0211	88660.8	2.58843	9.82936	0.62953	4.06321	1.30998	0.28979	1.1488	0.876959	1640.48	16.639	1646.95	10.6747	1655.21	11.6625	1655.21	11.6625	99.11
LEARY 4PS-186-Spot 292	61.9682	22594.3	2.10211	9.8284	0.860167	4.09429	1.38415	0.291977	1.08442	0.78346	1651.4	15.7984	1653.17	11.296	1655.39	15.9357	1655.39	15.9357	99.7591
LEARY 4PS-186-Spot 79	140.712	103132	2.59911	9.81936	0.714591	4.10334	1.58553	0.292354	1.41537	0.892678	1653.28	20.6403	1654.97	12.9453	1657.09	13.2354	1657.09	13.2354	99.7698
LEARY 4PS-186-Spot 278	138.962	65100.2	2.20772	9.81442	0.811697	4.08531	1.43248	0.290923	1.18032	0.823968	1646.14	17.1473	1651.37	11.6855	1658.03	15.0325	1658.03	15.0325	99.2829
LEARY 4PS-186-Spot 72	63.0629	301868	1.7668	9.79741	0.978093	3.93796	1.45421	0.279943	1.07613	0.740012	1591.08	15.1728	1621.52	11.7761	1661.24	18.1072	1661.24	18.1072	95.7765
LEARY 4PS-186-Spot 285	273.712	227034	3.0938	9.79209	0.915262	4.13211	1.51109	0.293585	1.20237	0.795695	1659.42	17.5912	1660.68	12.3543	1662.25	16.9417	1662.25	16.9417	99.83
LEARY 4PS-186-Spot 305	277.233	7498.19	9.14046	9.78043	0.947647	3.67476	1.57555	0.26078	1.2587	0.798894	1493.83	16.7832	1565.9	12.5763	1664.45	17.5363	1664.45	17.5363	89.7493
LEARY 4PS-186-Spot 165	104.13	22200.6	1.91335	9.75476	0.94736	4.21652	1.74839	0.298441	1.46948	0.840476	1683.57	21.773	1677.24	14.3506	1669.31	17.5201	1669.31	17.5201	100.855
LEARY 4PS-186-Spot 296	35.1906	29672.3	1.79291	9.71819	0.943237	4.06824	1.77399	0.286867	1.50245	0.846931	1625.85	21.5907	1647.96	14.4597	1676.25	17.4284	1676.25	17.4284	96.9932
LEARY 4PS-186-Spot 94	97.0486	24960.2	2.52172	9.64636	1.3354	4.41513	2.23284	0.309026	1.78949	0.801442	1735.91	27.2331	1715.18	18.4872	1689.95	24.6329	1689.95	24.6329	102.72
LEARY 4PS-186-Spot 271	103.404	51443.5	1.6709	9.63253	0.903403	4.12317	1.68228	0.288177	1.41913	0.843575	1632.41	20.4657	1658.91	13.7483	1692.6	16.6577	1692.6	16.6577	96.4443
LEARY 4PS-186-Spot 121	87.5438	34382.9	3.04405	9.61046	0.972916	4.09728	1.52027	0.285711	1.16819	0.768407	1620.06	16.7346	1653.76	12.4088	1696.83	17.93	1696.83	17.93	95.4761
LEARY 4PS-186-Spot 275	257.236	92389.7	5.29236	9.53821	0.876116	4.40889	1.55083	0.305129	1.27965	0.825137	1716.69	19.2859	1714.01	12.8363	1710.72	16.1176	1710.72	16.1176	100.349
LEARY 4PS-186-Spot 168	101.244	22678.2	2.37806	9.49234	0.929481	4.50557	1.56812	0.310321	1.26295	0.805396	1742.29	19.2815	1732	13.031	1719.58	17.0804	1719.58	17.0804	101.32
LEARY 4PS-186-Spot 258	75.2785	33695	1.71192	9.4776	0.856387	4.17	1.49645	0.286762	1.22718	0.82006	1625.33	17.63	1668.15	12.2563	1722.44	15.7331	1722.44	15.7331	94.3622
LEARY 4PS-186-Spot 277	150.073	118954	2.54951	9.43812	0.666268	4.44524	1.29087	0.304417	1.10564	0.856506	1713.17	16.6336	1720.81	10.7006	1730.1	12.2267	1730.1	12.2267	99.0214
LEARY 4PS-186-Spot 135	503.383	117748	3.6016	9.4283	0.693764	4.53898	1.47332	0.310513	1.29975	0.882194	1743.23	19.8526	1738.14	12.2596	1732.01	12.7283	1732.01	12.7283	100.648
LEARY 4PS-186-Spot 114	100.569	20236.9	3.03467	9.38982	1.05581	4.34606	2.01334	0.296102	1.71429	0.851466	1671.95	25.2469	1702.15	16.6207	1739.51	19.3538	1739.51	19.3538	96.116
LEARY 4PS-186-Spot 3	296.491	202714	3.16126	9.35374	0.841971	4.44906	1.32504	0.301954	1.02314	0.772157	1700.99	15.2967	1721.52	10.9855	1746.56	15.4199	1746.56	15.4199	97.3908
LEARY 4PS-186-Spot 88	286.966	129978	2.87584	9.32147	0.918625	4.32746	1.45142	0.292688	1.12372	0.774222	1654.95	16.4018	1698.61	11.9717	1752.89	16.8106	1752.89	16.8106	94.4125
LEARY 4PS-186-Spot 110	127.718	176697	6.67146	9.2917	0.868557	4.53503	1.63802	0.305748	1.38878	0.847842	1719.75	20.9632	1737.42	13.6281	1758.74	15.8845	1758.74	15.8845	97.7827
LEARY 4PS-186-Spot 203	253.973	192434	4.62483	9.26731	0.758966	4.7219	1.294	0.31751	1.04805	0.809929	1777.56	16.2818	1771.13	10.8432	1763.55	13.8719	1763.55	13.8719	100.794
LEARY 4PS-186-Spot 13	243.534	146655	3.46458	9.26522	0.927434	4.54738	1.48131	0.305706	1.15506	0.779751	1719.54	17.4334	1739.68	12.3302	1763.96	16.9485	1763.96	16.9485	97.4819
LEARY 4PS-186-Spot 309	36.2847	21417.2	2.39919	9.23724	0.717168	4.77015	1.40261	0.319714	1.2054	0.859396	1788.33	18.8249	1779.66	11.7742	1769.49	13.0964	1769.49	13.0964	101.065
LEARY 4PS-186-Spot 232	46.4161	9034.43	4.8092	9.23092	0.929398	4.4543	1.66146	0.29834	1.3772	0.828908	1683.07	20.4005	1722.5	13.7781	1770.74	16.9701	1770.74	16.9701	95.0494
LEARY 4PS-186-Spot 157	114.15	22236.2	3.69243	9.21449	0.897018	4.65154	1.50764	0.310997	1.21175	0.80374	1745.61	18.5306	1758.57	12.6003	1773.99	16.3722	1773.99	16.3722	98.4004
LEARY 4PS-186-Spot 4	139.068	38443.4	5.3843	9.2012	0.949943	4.85187	1.73551	0.323923	1.45245	0.8369	1808.86	22.9087	1793.94	14.6117	1776.62	17.3327	1776.62	17.3327	101.814
LEARY 4PS-186-Spot 86	490.929	25421.5	3.31079	9.18953	0.947628	4.56237	1.79315	0.304209	1.52229	0.848951	1712.15	22.8899	1742.42	14.9351	1778.94	17.2855	1778.94	17.2855	96.2454
LEARY 4PS-186-Spot 140	204.165	8.79371e+06	2.06993	9.17355	0.981845	4.71618	1.6629	0.313917	1.3421	0.807081	1759.96	20.6705	1770.12	13.9318	1782.11	17.9027	1782.11	17.9027	98.7569
LEARY 4PS-186-Spot 25	205.141	34728.5	2.95591	9.17293	0.859011	4.85661	1.34042	0.323243	1.02899	0.767663	1805.55	16.2039	1794.76	11.2869	1782.23	15.6625	1782.23	15.6625	101.308
LEARY 4PS-186-Spot 175	390.629	942170	2.07322	9.16772	1.00341	4.7914	1.41985	0.318721	1.00457	0.707516	1783.48	15.6516	1783.39	11.9281	1783.27	18.2933	1783.27	18.2933	100.012
LEARY 4PS-186-Spot 92	126.458	90127.7	2.35561	9.16638	0.861662	4.667	1.46702	0.310402	1.1873	0.809328	1742.68	18.13	1761.34	12.2679	1783.53	15.7083	1783.53	15.7083	97.7095
LEARY 4PS-186-Spot 42	139.624	49320.8	6.61171	9.15224	0.89071	4.71266	1.664	0.312955	1.40553	0.844673	1755.23	21.597	1769.49	13.9392	1786.35	16.2323	1786.35	16.2323	98.258
LEARY 4PS-186-Spot 287	66.0518	40093	1.33201	9.13118	0.9657	4.80361	1.7453	0.31826	1.45379	0.832973	1781.23	22.6257	1785.53	14.669	1790.55	17.59	1790.55	17.59	99.4795
LEARY 4PS-186-Spot 101	173.089	58212.4	2.15038	9.12655	0.900336	4.25804	1.94115	0.281971	1.71972	0.885931	1601.28	24.384	1685.29	15.9628	1791.47	16.3974	1791.47	16.3974	89.3836
LEARY 4PS-186-Spot 36	177.299	31767.6	3.65632	9.09786	0.713303	5.04982	1.37824	0.333352	1.1793	0.855656	1854.61	19.0065	1827.72	11.6817	1797.2	12.9832	1797.2	12.9832	103.194
LEARY 4PS-186-Spot 179	199.753	2.07986e+06	2.20422	9.08914	0.877458	4.75364	1.52617	0.313499	1.2487	0.818194	1757.9	19.2125	1776.75	12.8038	1798.95	15.9678	1798.95	15.9678	97.7184
LEARY 4PS-186-Spot 215	223.504	57105.4	2.73889	9.05138	0.797879	4.83286	1.43094	0.3174	1.18785	0.830116	1777.02	18.4488	1790.64	12.0391	1806.52	14.5042	1806.52	14.5042	98.3669
LEARY 4PS-186-Spot 119	175.006	41739.3	2.27846	9.04359	1.04584	4.9557	1.56758	0.325187	1.1677	0.744908	1815.01	18.4718	1811.8	13.2452	1808.09	19.0089	1808.09	19.0089	100.383
LEARY 4PS-186-Spot 240	127.789	30544.6	1.84272	9.00512	0.905744	4.88975	1.56165	0.319495	1.27215	0.814622	1787.26	19.8571	1800.49	13.1652	1815.83	16.4466	1815.83	16.4466	98.4267
LEARY 4PS-186-Spot 81	81.9473	28560.9	1.94526	8.88397	0.975993	5.11353	1.58973	0.329621	1.25487	0.789357	1836.55	20.0542	1838.36	13.5023	1840.39	17.6694	1840.39	17.6694	99.7912
LEARY 4PS-186-Spot 211	68.6042	243594	2.5526	8.8769	0.944868	4.94452	1.48725	0.318473	1.14854	0.772256	1782.27	17.8841	1809.89	12.5616	1841.83	17.1028	1841.83	17.1028	96.7662
LEARY 4PS-186-Spot 127	351.956	684842	2.97548	8.85666	0.861066	4.59088	1.60017	0.295021	1.34875	0.842876	1666.57	19.8074	1747.61	13.3425	1845.96	15.5779	1845.96	15.5779	90.2823
LEARY 4PS-186-Spot 214	250.556	94740	0.760176	8.83825	0.994588	5.09233	1.64093	0.326566	1.30517	0.79538	1821.72	20.7123	1834.83	13.9278	1849.72	17.9857	1849.72	17.9857	98.4858
LEARY 4PS-186-Spot 298	66.9517	17021.2	1.03442	8.83233	0.769684	5.07943	1.42059	0.32552	1.19401	0.840502	1816.63	18.9024	1832.68	12.0523	1850.94	13.916	1850.94	13.916	98.1467
LEARY 4PS-186-Spot 44	166.195	39693	3.71701	8.80091	0.853651	5.2271	1.61923	0.333792	1.37593	0.849744	1856.74	22.1975	1857.04	13.8019	1857.37	15.4224	1857.37	15.4224	99.9658
LEARY 4PS-186-Spot 102	36.521	27310.6	3.40827	8.79942	0.92062	5.22565	1.53351	0.333643	1.22642	0.799747	1856.02	19.7788	1856.81	13.0706	1857.68	16.6319	1857.68	16.6319	99.9104
LEARY 4PS-186-Spot 251	127.832	20877	3.77032	8.73543	0.811234	5.20847	1.49695	0.330128	1.25808	0.840427	1839	20.1287	1854	12.7522	1870.86	14.6341	1870.86	14.6341	98.2973
LEARY 4PS-186-Spot 246	163.338	540161	1.0991	8.71285	0.836713	5.13737	1.26399	0.324779	0.947411	0.749539	1813.03	14.9728	1842.31	10.7436	1875.52	15.0833	1875.52	15.0833	96.6679
LEARY 4PS-186-Spot 231	173.577	41961.2	3.06869	8.67066	0.767567	5.36249	1.82156	0.33737	1.65194	0.906884	1874.01	26.864	1878.89	15.59	1884.27	13.8221	1884.27	13.8221	99.4552
LEARY 4PS-186-Spot 225	59.7256	29642.4	1.20766	8.61592	0.951259	5.41863	1.66331	0.33875	1.36445	0.820319	1880.65	22.2564	1887.8	14.2587	1895.66	17.1072	1895.66	17.1072	99.208
LEARY 4PS-186-Spot 146	189.992	94380.2	3.54502	8.54055	0.896225	5.47467	1.73238	0.339259	1.48254	0.855782	1883.1	24.21	1896.63	14.8746	1911.45	16.087	1911.45	16.087	98.517
LEARY 4PS-186-Spot 107	152.394	28993	5.71407	8.43179	1.00781	5.62384	1.4995	0.344065	1.11032	0.740463	1906.2	18.3227	1919.76	12.9277	1934.42	18.041	1934.42	18.041	98.5408
LEARY 4PS-186-Spot 224	182.535	65431.3	2.0816	8.19424	0.695072	6.02079	1.60862	0.357973	1.4507	0.90183	1972.56	24.6523	1978.85	14.0081	1985.43	12.3696	1985.43	12.3696	99.3517
LEARY 4PS-186-Spot 49	103.495	154331	3.47343	7.73747	1.11202	6.76428	1.77315	0.379759	1.38111	0.778904	2075.16	24.505	2081.06	15.6866	2086.89	19.559	2086.89	19.559	99.4378
LEARY 4PS-186-Spot 243	112.722	57971.4	5.44154	7.64849	0.897963	7.14594	1.47273	0.396573	1.16731	0.792613	2153.24	21.368	2129.79	13.1189	2107.22	15.7573	2107.22	15.7573	102.184
LEARY 4PS-186-Spot 64	243.849	71986.9	3.43568	7.63981	0.90705	6.17405	1.50568	0.342248	1.20181	0.798181	1897.47	19.7543	2000.78	13.1581	2109.21	15.9132	2109.21	15.9132	89.9614
LEARY 4PS-186-Spot 78	60.318	85633.3	2.53327	7.56227	0.942938	6.97541	1.82962	0.382745	1.56792	0.856966	2089.09	27.9777	2108.3	16.2497	2127.08	16.5099	2127.08	16.5099	98.214
LEARY 4PS-186-Spot 35	147.933	236794	2.56966	7.42385	1.05127	7.14829	1.61973	0.385052	1.23221	0.760752	2099.84	22.083	2130.08	14.429	2159.37	18.3412	2159.37	18.3412	97.2431
LEARY 4PS-186-Spot 181	386.858	50480	2.10441	7.41866	0.938265	7.40843	1.55292	0.398785	1.23742	0.796837	2163.44	22.7418	2161.99	13.8937	2160.59	16.367	2160.59	16.367	100.132
LEARY 4PS-186-Spot 113	22.8098	9285.95	1.26643	6.28232	0.913696	9.73497	1.56684	0.443754	1.27285	0.812367	2367.43	25.2201	2410.02	14.4284	2446.18	15.466	2446.18	15.466	96.7803
LEARY 4PS-186-Spot 191	81.0549	38854.2	1.63847	5.92691	0.836358	11.1869	1.50915	0.481089	1.2562	0.832388	2532.01	26.304	2538.82	14.0671	2544.26	14.016	2544.26	14.016	99.5182
LEARY 4PS-186-Spot 227	35.0963	12447.6	1.11062	5.64812	0.745839	12.3658	1.76901	0.506774	1.60409	0.906775	2642.84	34.7791	2632.58	16.6198	2624.69	12.4045	2624.69	12.4045	100.691
LEARY 4PS-186-Spot 218	105.803	86995.3	3.46786	5.42248	0.633904	12.7608	1.17109	0.50207	0.984696	0.840834	2622.69	21.2176	2662.16	11.0274	2692.27	10.4723	2692.27	10.4723	97.4154
LEARY 4PS-186-Spot 197	134.216	54714.4	1.14697	5.40084	0.792189	13.1703	1.44609	0.516113	1.2098	0.8366	2682.67	26.549	2691.93	13.648	2698.87	13.0801	2698.87	13.0801	99.3997
LEARY 4PS-186-Spot 272	64.8045	66514.5	0.618144	5.3838	0.918398	13.3691	1.63291	0.522248	1.35016	0.826844	2708.71	29.8606	2706.07	15.4276	2704.09	15.1605	2704.09	15.1605	100.171
LEARY 4PS-186-Spot 192	121.33	31891.5	1.58478	5.37364	0.856072	13.4958	1.50614	0.526206	1.23919	0.822759	2725.45	27.5423	2714.99	14.239	2707.21	14.1274	2707.21	14.1274	100.674
LEARY 4PS-186-Spot 223	192.732	134992	1.88564	5.37258	0.886247	12.7429	1.52718	0.496752	1.24373	0.814392	2599.82	26.6094	2660.83	14.3794	2707.53	14.625	2707.53	14.625	96.0218
LEARY 4PS-186-Spot 141	50.3315	33857.7	11.47	5.36627	0.83196	13.1092	1.44406	0.510431	1.18032	0.817362	2658.47	25.7132	2687.54	13.6243	2709.47	13.7266	2709.47	13.7266	98.1176
LEARY 4PS-186-Spot 209	23.7992	8348.1	0.769396	5.32924	0.871793	13.2988	1.47865	0.51424	1.19432	0.807706	2674.7	26.1464	2701.1	13.9649	2720.89	14.3649	2720.89	14.3649	98.3024
LEARY 4PS-186-Spot 200	71.8363	88981.4	1.18162	5.32562	0.836291	13.6632	1.71132	0.527972	1.49306	0.872461	2732.9	33.2578	2726.65	16.1928	2722.01	13.7783	2722.01	13.7783	100.4
LEARY 4PS-186-Spot 112	140.008	58219.4	0.587815	5.32238	0.730494	13.7451	1.49119	0.530814	1.30002	0.871794	2744.88	29.0596	2732.31	14.1154	2723.02	12.0336	2723.02	12.0336	100.803
LEARY 4PS-186-Spot 151	134.981	135146	3.13613	5.30871	0.848717	13.6689	1.62427	0.526515	1.3849	0.852626	2726.75	30.7928	2727.05	15.3695	2727.25	13.9764	2727.25	13.9764	99.9816
LEARY 4PS-186-Spot 188	43.845	96577.5	2.05752	5.28108	0.966852	13.5209	1.82202	0.518103	1.54433	0.847592	2691.13	33.9764	2716.75	17.2281	2735.84	15.9098	2735.84	15.9098	98.3659
LEARY 4PS-186-Spot 21	191.708	86736.9	3.87731	5.27728	0.788258	13.8973	1.41178	0.532142	1.17123	0.82961	2750.47	26.2234	2742.73	13.3735	2737.02	12.9689	2737.02	12.9689	100.491
LEARY 4PS-186-Spot 213	355.811	234636	144.238	5.25751	0.849617	14.4014	1.44816	0.549378	1.17273	0.809812	2822.58	26.8061	2776.52	13.7504	2743.2	13.9708	2743.2	13.9708	102.894
LEARY 4PS-186-Spot 221	57.7041	34139	1.02714	5.25564	1.06372	13.3959	1.62189	0.51084	1.22435	0.754891	2660.21	26.6866	2707.97	15.3256	2743.78	17.4915	2743.78	17.4915	96.9542
LEARY 4PS-186-Spot 96	44.1936	15098.9	1.22429	5.25521	1.33425	13.5147	1.95556	0.515329	1.42969	0.731089	2679.34	31.3431	2716.32	18.4905	2743.92	21.9408	2743.92	21.9408	97.6466
LEARY 4PS-186-Spot 167	187.874	71756.3	6.64951	5.24557	0.870989	14.1375	1.35521	0.538089	1.03826	0.766122	2775.44	23.4152	2758.98	12.8522	2746.94	14.3174	2746.94	14.3174	101.038
LEARY 4PS-186-Spot 85	25.4021	16094.3	0.191415	5.21933	0.862721	14.0076	1.54893	0.530475	1.28643	0.830527	2743.45	28.7439	2750.22	14.6806	2755.18	14.174	2755.18	14.174	99.5746
LEARY 4PS-186-Spot 229	78.219	142382	2.52939	5.17669	0.784644	13.638	1.31865	0.512259	1.0598	0.803699	2666.27	23.1423	2724.9	12.4753	2768.65	12.8751	2768.65	12.8751	96.3022
LEARY 4PS-186-Spot 297	174.344	181948	1.77836	5.17204	0.92954	13.7068	1.67109	0.514383	1.38871	0.831017	2675.31	30.4077	2729.67	15.8155	2770.12	15.2472	2770.12	15.2472	96.5774
LEARY 4PS-186-Spot 84	114.792	35404.6	2.00236	4.982	0.916431	15.2247	1.31955	0.550353	0.949398	0.719488	2826.64	21.7259	2829.4	12.5733	2831.36	14.949	2831.36	14.949	99.8332
LEARY 4PS-186-Spot 169	36.5982	32017.2	1.55819	4.96564	0.825113	14.9978	1.2934	0.540369	0.99603	0.770086	2784.99	22.5247	2815.1	12.3127	2836.72	13.4526	2836.72	13.4526	98.1764
LEARY 4PS-186-Spot 91	40.7095	34489.5	2.39678	4.73487	0.827641	17.0612	1.52543	0.586145	1.28139	0.840016	2973.78	30.5256	2938.28	14.6324	2914.05	13.4053	2914.05	13.4053	102.05
LEARY 4PS-186-Spot 253	70.6094	44480.2	3.17414	4.58627	0.786913	16.9397	1.4523	0.563705	1.22063	0.840482	2881.92	28.3663	2931.42	13.9253	2965.58	12.6888	2965.58	12.6888	97.179
LEARY 4PS-186-Spot 245	65.5576	95231.9	1.37819	4.50574	0.848787	17.9692	1.57923	0.587464	1.33173	0.843282	2979.13	31.7699	2988.08	15.191	2994.1	13.6494	2994.1	13.6494	99.5002
2QZ-9							Isotope ratios						Apparent ages (Ma)
Analysis	U	206Pb	U/Th	206Pb*	±	207Pb*	±	206Pb*	±	error	206Pb*	±	207Pb*	±	206Pb*	±	Best age	±	Conc
	(ppm)	204Pb		207Pb*	(%)	235U*	(%)	238U	(%)	corr.	238U*	(Ma)	235U	(Ma)	207Pb*	(Ma)	(Ma)	(Ma)	(%)
2QZ-9RUN2-Spot 8	219.756	19907.5	4.8035	19.0867	1.46475	0.378661	3.04493	0.0524408	2.66947	0.876696	329.489	8.57463	326.052	8.49199	302.557	33.3915	329.489	8.57463	NA
2QZ-9-Spot 2	680.82	27431.3	1.57545	18.2757	1.05228	0.40167	2.60216	0.0532638	2.3799	0.914587	334.528	7.75839	342.858	7.57172	400.67	23.5753	334.528	7.75839	NA
2QZ-9-Spot 198	845.198	48619.3	2.55787	18.9144	1.21073	0.393542	2.82955	0.0540095	2.55744	0.903833	339.091	8.44792	336.953	8.11386	323.239	27.4909	339.091	8.44792	NA
2QZ-9-Spot 87	646.545	46986.9	3.22136	18.6521	1.03233	0.409647	2.48696	0.0554402	2.26258	0.909778	347.835	7.66151	348.621	7.33849	354.847	23.312	347.835	7.66151	NA
2QZ-9-Spot 65	145.27	10292	2.99374	19.1549	2.04662	0.410983	3.61554	0.0571206	2.98052	0.824363	358.091	10.3819	349.583	10.6935	294.441	46.7283	358.091	10.3819	NA
2QZ-9-Spot 52	130.867	50061.1	2.91432	18.3148	1.19639	0.476301	2.82286	0.0632954	2.55679	0.905745	395.636	9.81144	395.532	9.24779	395.88	26.8262	395.636	9.81144	NA
2QZ-9RUN2-Spot 77	558.237	64649	2.02268	18.112	1.20059	0.500669	3.07536	0.0657968	2.83133	0.92065	410.783	11.2678	412.155	10.4186	420.799	26.804	410.783	11.2678	97.6196
2QZ-9-Spot 112	83.1317	18642.8	1.56283	17.9391	1.46804	0.509442	3.20726	0.0663107	2.85156	0.889095	413.89	11.4314	418.074	10.9916	442.17	32.6726	413.89	11.4314	93.6043
2QZ-9RUN2-Spot 18	221.203	54390	1.83011	18.3029	1.43449	0.499694	2.74263	0.066361	2.33758	0.852313	414.195	9.37765	411.495	9.27922	397.337	32.1571	414.195	9.37765	104.243
2QZ-9-Spot 107	250.438	16647.5	2.43659	18.2331	1.06835	0.506452	3.01299	0.0670017	2.81722	0.935026	418.066	11.4041	416.061	10.2855	405.907	23.913	418.066	11.4041	102.996
2QZ-9-Spot 206	671.436	214786	3.05135	17.9051	1.11249	0.517059	3.12648	0.0671747	2.92185	0.934551	419.112	11.8562	423.185	10.8203	446.384	24.7379	419.112	11.8562	93.8904
2QZ-9RUN2-Spot 22	207.182	6281.93	3.25516	17.7411	1.40305	0.525584	2.80994	0.0676567	2.43459	0.866419	422.022	9.94542	428.874	9.82985	466.802	31.0751	422.022	9.94542	90.4072
2QZ-9-Spot 166	179.723	19866.5	1.59376	17.9839	1.39504	0.525947	2.95294	0.0686298	2.60264	0.881371	427.896	10.775	429.116	10.3348	436.624	31.0624	427.896	10.775	98.001
2QZ-9-Spot 196	112.783	18369.6	1.81756	17.9444	1.62804	0.532053	3.2454	0.0692742	2.8075	0.865072	431.781	11.7252	433.171	11.4445	441.516	36.2165	431.781	11.7252	97.7951
2QZ-9RUN2-Spot 107	68.2468	8426.82	1.53598	17.5791	1.58165	0.543203	3.0418	0.0692861	2.59826	0.854184	431.853	10.8531	440.534	10.8722	487.093	34.9092	431.853	10.8531	88.6593
2QZ-9-Spot 164	484.532	122292	5.47133	17.9873	1.48349	0.53172	3.98289	0.0693966	3.69631	0.928047	432.519	15.4628	432.951	14.0398	436.195	33.0396	432.519	15.4628	99.1573
2QZ-9RUN2-Spot 38	83.8128	3649.21	1.55584	17.9544	1.71696	0.533271	3.85612	0.0694715	3.45279	0.895403	432.971	14.4586	433.978	13.6187	440.273	38.2033	432.971	14.4586	98.3415
2QZ-9-Spot 121	609.24	50756.9	1.38902	18.0706	1.00842	0.531353	3.43285	0.0696695	3.28139	0.95588	434.164	13.7775	432.707	12.0952	425.909	22.4937	434.164	13.7775	101.938
2QZ-9-Spot 4	250.394	74171.7	0.803615	18.1303	1.13318	0.529808	2.39277	0.0696967	2.10743	0.880748	434.328	8.85162	431.682	8.41438	418.537	25.309	434.328	8.85162	103.773
2QZ-9-Spot 94	576.452	179619	1.60833	17.6871	1.07649	0.545826	3.06288	0.0700485	2.86747	0.936201	436.448	12.1008	442.259	10.9817	473.55	23.8233	436.448	12.1008	92.1651
2QZ-9-Spot 115	798.183	2.69232e+06	1.38598	17.817	0.890963	0.5455	2.73328	0.0705209	2.584	0.945381	439.293	10.9732	442.045	9.79612	457.38	19.765	439.293	10.9732	96.0456
2QZ-9RUN2-Spot 71	163.683	14312.8	2.29558	17.7442	1.28485	0.549414	2.83119	0.0707364	2.52286	0.891093	440.59	10.7441	444.613	10.194	466.465	28.4799	440.59	10.7441	94.4532
2QZ-9-Spot 133	456.3	77926.1	13.0035	17.8814	1.19435	0.548249	2.79453	0.0711325	2.52644	0.904068	442.975	10.8157	443.849	10.0482	449.33	26.5419	442.975	10.8157	98.5857
2QZ-9RUN2-Spot 12	262.763	6815.85	1.6278	17.933	1.08975	0.549247	2.66485	0.0714674	2.43184	0.912563	444.99	10.4564	444.503	9.59318	442.929	24.2474	444.99	10.4564	100.465
2QZ-9-Spot 45	121.175	40476.7	1.77325	18.0291	1.59811	0.554261	3.12868	0.0725064	2.68974	0.859704	451.238	11.7221	447.784	11.3292	431.026	35.6153	451.238	11.7221	104.689
2QZ-9RUN2-Spot 13	454.305	25664.3	2.74057	17.7997	1.1249	0.593104	2.75092	0.0766006	2.51041	0.912572	475.8	11.5144	472.848	10.3994	459.519	24.9662	475.8	11.5144	103.543
2QZ-9-Spot 134	320.544	404352	1.64178	17.2888	1.12939	0.615639	2.95183	0.0772287	2.72722	0.923911	479.56	12.6041	487.11	11.4214	523.721	24.791	479.56	12.6041	91.5677
2QZ-9RUN2-Spot 75	274.533	12642.9	2.15083	17.5414	1.3465	0.619998	3.22239	0.078912	2.92758	0.908512	489.626	13.8033	489.846	12.5229	491.859	29.6941	489.626	13.8033	99.5458
2QZ-9RUN2-Spot 74	493.474	349022	2.58987	17.1827	1.20421	0.64729	3.16605	0.0807009	2.9281	0.924842	500.305	14.0954	506.81	12.6328	537.232	26.3388	500.305	14.0954	93.1264
2QZ-9-Spot 108	597.799	43695.7	15.9961	17.4494	1.06014	0.642539	2.83813	0.0813519	2.6327	0.927617	504.187	12.7679	503.877	11.2736	503.406	23.3533	504.187	12.7679	100.155
2QZ-9-Spot 186	799.74	76993.6	1.97897	17.3826	0.963716	0.650139	3.29912	0.0819991	3.15522	0.956384	508.044	15.4146	508.565	13.1989	511.879	21.1676	508.044	15.4146	99.2508
2QZ-9-Spot 220	359.66	63047.2	1.47887	17.2777	1.21996	0.65586	2.63512	0.0822213	2.33571	0.886379	509.368	11.4395	512.079	10.5982	525.131	26.7505	509.368	11.4395	96.9983
2QZ-9RUN2-Spot 70	306.414	42317.2	2.66895	16.6345	1.51543	0.690658	2.63301	0.0833603	2.15319	0.817767	516.149	10.6804	533.195	10.9221	607.738	32.7689	516.149	10.6804	84.9295
2QZ-9-Spot 55	466.379	61582.8	1.19722	17.1928	1.15214	0.674431	3.04213	0.0841343	2.81551	0.925508	520.753	14.0853	523.403	12.4423	535.915	25.2348	520.753	14.0853	97.1708
2QZ-9-Spot 192	808.187	103419	3.27936	17.1055	1.10445	0.695021	3.27296	0.0862623	3.08098	0.941344	533.394	15.7723	535.812	13.6276	547.052	24.1366	533.394	15.7723	97.5033
2QZ-9-Spot 118	734.753	49453.4	7.09321	16.4146	0.942912	0.743945	3.03324	0.0886049	2.88296	0.950456	547.281	15.1268	564.705	13.1392	636.484	20.3122	547.281	15.1268	85.985
2QZ-9-Spot 86	161.71	13578	6.22902	17.1591	1.26607	0.721623	3.20976	0.0898446	2.94952	0.91892	554.618	15.6746	551.625	13.6616	540.258	27.7117	554.618	15.6746	102.658
2QZ-9-Spot 210	484.636	28637	5.22912	16.9936	1.04992	0.739064	2.98073	0.0911285	2.7897	0.935911	562.208	15.0195	561.859	12.863	561.373	22.8672	562.208	15.0195	100.149
2QZ-9RUN2-Spot 103	182.24	115745	3.06239	16.5003	1.06457	0.780129	2.31836	0.0933996	2.05949	0.888338	575.612	11.3408	585.557	10.3167	625.228	22.973	575.612	11.3408	92.0643
2QZ-9RUN2-Spot 83	293.625	63371.5	1.85412	16.7467	1.25107	0.785288	3.3889	0.0954214	3.14952	0.929363	587.521	17.686	588.496	15.1371	593.221	27.0982	587.521	17.686	99.0391
2QZ-9-Spot 89	162.355	417902	0.462458	16.7054	1.3925	0.793211	3.00064	0.0961467	2.65797	0.8858	591.787	15.0292	592.992	13.4781	598.566	30.1372	591.787	15.0292	98.8676
2QZ-9RUN2-Spot 89	428.359	19751.1	0.644581	16.3857	0.992688	0.818906	2.81887	0.0973614	2.63829	0.93594	598.927	15.0896	607.438	12.887	640.271	21.3492	598.927	15.0896	93.5428
2QZ-9-Spot 6	270.313	49401.8	2.42913	16.711	0.880598	0.804764	2.51069	0.0975798	2.35119	0.936473	600.21	13.4751	599.513	11.3681	597.799	19.0714	600.21	13.4751	100.403
2QZ-9-Spot 124	346.799	233763	1.17347	16.6283	1.19983	0.810851	3.11883	0.097831	2.87881	0.92304	601.685	16.5376	602.931	14.1811	608.539	25.9619	601.685	16.5376	98.8738
2QZ-9-Spot 162	597.608	46918.4	1.49424	16.6802	1.10671	0.819117	3.59977	0.099137	3.42543	0.951568	609.349	19.9167	607.555	16.4599	601.791	23.9543	609.349	19.9167	101.256
2QZ-9-Spot 100	202.494	63279.2	2.16673	16.4245	0.958905	0.836308	2.55526	0.0996661	2.36851	0.926916	612.452	13.8382	617.106	11.8169	635.176	20.6605	612.452	13.8382	96.4224
2QZ-9RUN2-Spot 2	789.129	40882.7	1.91383	16.5087	1.15088	0.832778	2.96174	0.0997541	2.72899	0.921415	612.968	15.9572	615.153	13.6654	624.121	24.8226	612.968	15.9572	98.2129
2QZ-9RUN2-Spot 60	901.446	70473.7	2.39116	16.7499	0.944388	0.833112	2.70194	0.101252	2.53152	0.936928	621.741	15.0044	615.337	12.4693	592.766	20.4725	621.741	15.0044	104.888
2QZ-9RUN2-Spot 33	112.97	11892.9	2.30106	16.2744	1.398	0.858869	3.14893	0.101419	2.82159	0.896047	622.72	16.7487	629.505	14.7741	654.868	30.0135	622.72	16.7487	95.0909
2QZ-9-Spot 146	158.317	149136	2.37479	16.1857	1.10863	0.868837	2.89978	0.102037	2.67949	0.924033	626.335	15.9931	634.935	13.6895	666.588	23.7298	626.335	15.9931	93.9614
2QZ-9-Spot 69	222.356	53739.2	2.51122	16.5163	1.06928	0.856951	2.83129	0.102697	2.62161	0.925943	630.193	15.7394	628.457	13.2677	623.134	23.0825	630.193	15.7394	101.133
2QZ-9-Spot 75	376.813	79469.6	1.39197	16.3191	1.18834	0.867808	3.08577	0.102756	2.84777	0.922873	630.539	17.1061	634.377	14.5584	649.028	25.523	630.539	17.1061	97.1512
2QZ-9-Spot 56	592.799	71052.6	1.34913	16.5084	1.17628	0.859821	3.78093	0.102991	3.5933	0.950375	631.916	21.6293	630.025	17.7505	624.162	25.3693	631.916	21.6293	101.242
2QZ-9-Spot 173	246.081	571085	2.27932	16.0156	0.94273	0.893125	3.31057	0.103787	3.1735	0.958598	636.566	19.2361	648.047	15.8599	689.156	20.1032	636.566	19.2361	92.3689
2QZ-9RUN2-Spot 54	351.428	11707.2	2.1421	15.2675	1.88321	0.940542	3.3579	0.104192	2.78012	0.827932	638.93	16.9111	673.166	16.5269	790.369	39.537	638.93	16.9111	80.8394
2QZ-9-Spot 191	269.556	46092.3	2.16678	16.462	0.955318	0.879652	2.50659	0.10507	2.31741	0.924525	644.055	14.204	640.795	11.9115	630.276	20.5865	644.055	14.204	102.186
2QZ-9RUN2-Spot 86	1412.93	49617	3.0736	15.8194	0.949393	0.91628	2.62103	0.105174	2.44304	0.932092	644.657	14.9874	660.391	12.7261	715.411	20.1661	644.657	14.9874	90.11
2QZ-9RUN2-Spot 43	237.909	170299	2.02723	15.719	1.0501	0.932128	3.11575	0.106314	2.93346	0.941494	651.304	18.1723	668.754	15.2639	728.947	22.2367	651.304	18.1723	89.3485
2QZ-9RUN2-Spot 80	300.918	6507.01	0.896828	15.4076	1.28267	0.956625	2.936	0.106946	2.641	0.899522	654.985	16.4484	681.546	14.5764	771.181	27.0015	654.985	16.4484	84.9327
2QZ-9-Spot 18	198.297	45273.2	0.968151	16.3927	1.32761	0.906554	2.79838	0.107828	2.4634	0.880297	660.123	15.4566	655.224	13.5116	639.348	28.557	660.123	15.4566	103.249
2QZ-9RUN2-Spot 37	298.989	25065.9	12.3215	16.0013	1.21784	0.97235	2.61423	0.112892	2.31324	0.884864	689.524	15.1269	689.674	13.0869	691.076	25.9527	689.524	15.1269	99.7755
2QZ-9-Spot 16	61.6982	14390.4	66.6579	15.097	1.81701	1.03163	3.12066	0.113006	2.53712	0.813007	690.181	16.6059	719.742	16.0913	813.939	38.0073	690.181	16.6059	84.7952
2QZ-9-Spot 216	392.033	91202.9	1.22242	15.9724	1.14684	1.0149	3.45283	0.11762	3.25681	0.943228	716.849	22.0952	711.346	17.6611	694.948	24.429	716.849	22.0952	103.152
2QZ-9RUN2-Spot 1	261.517	48467.2	1.58073	15.5342	1.11036	1.07274	2.25118	0.120912	1.9583	0.869896	735.814	13.6175	740.085	11.8307	753.931	23.418	735.814	13.6175	97.597
2QZ-9RUN2-Spot 41	272.205	63562.9	2.45728	15.2993	0.894649	1.09763	2.43633	0.121847	2.26612	0.930137	741.185	15.8666	752.202	12.9454	786.003	18.7876	741.185	15.8666	94.2981
2QZ-9RUN2-Spot 56	213.336	15476.2	1.85553	15.3585	1.21142	1.13431	3.09953	0.126405	2.853	0.920459	767.326	20.6391	769.804	16.7278	777.895	25.4735	767.326	20.6391	98.6413
2QZ-9-Spot 82	140.887	62566.1	2.49686	15.2747	1.0898	1.18522	2.7552	0.131359	2.5305	0.918448	795.613	18.9402	793.74	15.1746	789.379	22.8932	795.613	18.9402	100.79
2QZ-9RUN2-Spot 23	133.977	9797.95	2.18308	14.3344	1.41876	1.54844	3.41229	0.16105	3.10336	0.909465	962.611	27.75	949.87	21.0551	921.379	29.1635	921.379	29.1635	104.475
2QZ-9-Spot 62	364.325	39699.5	1.27625	14.3111	1.12145	1.41353	4.44036	0.14678	4.29641	0.967582	882.887	35.4499	894.646	26.4118	924.73	23.0418	924.73	23.0418	95.4752
2QZ-9-Spot 15	256.126	34453.2	6.33942	14.2766	1.0543	1.45808	3.03988	0.151041	2.8512	0.93793	906.794	24.1185	913.218	18.3113	929.665	21.6447	929.665	21.6447	97.5398
2QZ-9-Spot 71	54.5019	23337.8	0.669219	14.1146	1.41837	1.48999	2.85753	0.152595	2.48066	0.868115	915.492	21.1714	926.311	17.3639	953.026	29.0134	953.026	29.0134	96.0616
2QZ-9-Spot 172	890.772	53468.3	14.613	14.0516	0.850043	1.3909	2.52488	0.14181	2.37748	0.941624	854.892	19.0349	885.077	14.9154	962.214	17.3441	962.214	17.3441	88.8463
2QZ-9-Spot 103	196.574	326961	3.26146	14.0394	0.967706	1.6407	2.79691	0.167135	2.62417	0.938238	996.306	24.2247	985.983	17.6467	963.982	19.7668	963.982	19.7668	103.353
2QZ-9-Spot 40	87.9406	28959.5	1.4944	13.9338	1.15266	1.6582	2.66994	0.167646	2.40831	0.902009	999.127	22.2902	992.688	16.913	979.355	23.4836	979.355	23.4836	102.019
2QZ-9-Spot 181	621.244	70329.8	2.26213	13.9146	0.909412	1.61504	2.88803	0.163057	2.74111	0.949128	973.745	24.7734	976.066	18.1126	982.199	18.4992	982.199	18.4992	99.1393
2QZ-9-Spot 9	145.791	742417	1.92902	13.9077	1.18948	1.65862	3.11268	0.167374	2.87644	0.924105	997.628	26.5861	992.848	19.7201	983.206	24.2197	983.206	24.2197	101.467
2QZ-9RUN2-Spot 99	1057.92	147165	5.43817	13.8987	1.0638	1.63449	2.7301	0.164834	2.51431	0.92096	983.582	22.9362	983.591	17.2003	984.499	21.6375	984.499	21.6375	99.9069
2QZ-9RUN2-Spot 62	172.942	69822.7	2.14023	13.8939	0.986995	1.54819	2.35958	0.156076	2.14324	0.908312	934.931	18.6526	949.771	14.5575	985.217	20.0706	985.217	20.0706	94.896
2QZ-9-Spot 135	97.4554	23513.9	2.34943	13.8312	1.19145	1.6899	3.13513	0.169593	2.89991	0.924973	1009.87	27.1068	1004.73	20.0017	994.429	24.2126	994.429	24.2126	101.553
2QZ-9-Spot 213	285.166	84145.8	1.92914	13.7949	0.997838	1.69423	2.35889	0.169582	2.13745	0.906124	1009.81	19.9785	1006.36	15.0628	999.722	20.2665	999.722	20.2665	101.009
2QZ-9RUN2-Spot 94	299.454	23673.2	2.2213	13.7865	0.888686	1.62584	2.06263	0.162638	1.86136	0.902423	971.42	16.7852	980.253	12.9683	1000.96	18.0258	1000.96	18.0258	97.0492
2QZ-9-Spot 168	50.2348	20565.7	3.46398	13.7759	0.965866	1.66892	2.89734	0.166819	2.7316	0.942798	994.56	25.1756	996.776	18.3982	1002.52	19.5886	1002.52	19.5886	99.2057
2QZ-9-Spot 187	88.0331	16514.3	1.8206	13.7453	1.12126	1.71587	3.16183	0.171131	2.95634	0.93501	1018.34	27.8483	1014.48	20.2863	1007.03	22.7422	1007.03	22.7422	101.123
2QZ-9RUN2-Spot 49	61.8099	25171.3	2.21586	13.7216	1.2639	1.74496	2.8347	0.173732	2.53733	0.895099	1032.64	24.2107	1025.3	18.2992	1010.54	25.6089	1010.54	25.6089	102.187
2QZ-9-Spot 217	1177.37	135787	5.25962	13.6659	0.769373	1.75166	2.0808	0.17369	1.93334	0.929132	1032.41	18.4438	1027.77	13.4506	1018.78	15.58	1018.78	15.58	101.338
2QZ-9-Spot 148	210.684	67760.1	3.33154	13.4747	0.765179	1.87514	2.17118	0.183333	2.03188	0.93584	1085.16	20.2933	1072.35	14.3791	1047.29	15.4481	1047.29	15.4481	103.616
2QZ-9-Spot 57	390.409	101550	4.34504	13.473	1.10409	1.68371	3.27112	0.164596	3.07915	0.941315	982.27	28.0542	1002.39	20.841	1047.54	22.2815	1047.54	22.2815	93.7692
2QZ-9RUN2-Spot 46	1233.96	118331	8.77785	13.4464	0.909984	1.71333	2.30984	0.167161	2.12304	0.919128	996.449	19.6011	1013.53	14.8109	1051.52	18.356	1051.52	18.356	94.7625
2QZ-9RUN2-Spot 32	377.341	115399	12.5368	13.4394	1.01332	1.87015	2.87607	0.182366	2.69165	0.935877	1079.89	26.7628	1070.58	19.0306	1052.57	20.4346	1052.57	20.4346	102.595
2QZ-9-Spot 219	302.262	476151	1.20835	13.4357	0.847342	1.85711	3.11496	0.181045	2.99749	0.962291	1072.68	29.621	1065.96	20.5614	1053.13	17.0896	1053.13	17.0896	101.856
2QZ-9-Spot 136	393.447	46813.6	1.8893	13.4196	1.0193	1.83855	2.57644	0.17902	2.36624	0.918414	1061.62	23.1611	1059.34	16.9461	1055.55	20.5463	1055.55	20.5463	100.575
2QZ-9-Spot 155	495.414	452125	3.60993	13.4092	1.00832	1.74327	3.43166	0.169611	3.28018	0.955858	1009.97	30.6642	1024.67	22.1462	1057.11	20.3161	1057.11	20.3161	95.5398
2QZ-9-Spot 19	121.854	23710.2	0.638169	13.3803	0.933941	1.67191	2.3991	0.162317	2.20985	0.921116	969.642	19.894	997.912	15.2441	1061.46	18.8107	1061.46	18.8107	91.3501
2QZ-9-Spot 7	316.283	261488	1.72961	13.37	1.23881	1.76052	3.43626	0.170789	3.20519	0.932755	1016.46	30.141	1031.04	22.2554	1062.99	24.939	1062.99	24.939	95.6224
2QZ-9-Spot 12	41.8389	16864.8	1.11273	13.3368	1.28951	1.87769	2.46535	0.181703	2.10122	0.852301	1076.27	20.8279	1073.25	16.3353	1068	25.9401	1068	25.9401	100.774
2QZ-9RUN2-Spot 65	70.021	34659.6	1.78531	13.3346	1.15351	1.90841	2.74649	0.184646	2.49251	0.907527	1092.31	25.0443	1084.03	18.3008	1068.33	23.1679	1068.33	23.1679	102.244
2QZ-9-Spot 176	60.7906	33075.8	1.15403	13.2887	1.12868	1.91189	3.04402	0.184345	2.82703	0.928718	1090.67	28.3664	1085.24	20.2966	1075.26	22.6442	1075.26	22.6442	101.433
2QZ-9-Spot 93	65.2696	38098.7	1.79777	13.2776	1.1796	1.94047	3.24772	0.186945	3.02592	0.931708	1104.81	30.723	1095.16	21.7653	1076.94	23.6614	1076.94	23.6614	102.588
2QZ-9-Spot 203	267.222	267567	2.10464	13.263	0.881958	1.96476	2.45787	0.189077	2.29418	0.933403	1116.37	23.5167	1103.51	16.5405	1079.13	17.6981	1079.13	17.6981	103.451
2QZ-9-Spot 47	548.139	104467	2.11316	13.2423	1.02781	1.79979	2.85994	0.172931	2.66887	0.93319	1028.24	25.3657	1045.38	18.6695	1082.27	20.6089	1082.27	20.6089	95.0077
2QZ-9-Spot 32	247.811	64697.2	1.04508	13.1372	1.14933	1.949	2.96894	0.185782	2.73745	0.92203	1098.48	27.6481	1098.1	19.9262	1098.2	22.9987	1098.2	22.9987	100.026
2QZ-9-Spot 144	64.8039	14894.7	1.10317	13.1305	1.29404	1.94238	2.58352	0.185057	2.23608	0.865515	1094.54	22.5099	1095.82	17.3189	1099.22	25.8719	1099.22	25.8719	99.5741
2QZ-9RUN2-Spot 55	312.619	308063	2.78135	13.0449	0.961344	2.09603	2.65173	0.198393	2.47134	0.931971	1166.68	26.3742	1147.51	18.2305	1112.3	19.1968	1112.3	19.1968	104.889
2QZ-9-Spot 41	140.618	30456.6	2.93295	12.991	1.04721	2.08763	3.03318	0.19678	2.84667	0.938511	1158	30.1735	1144.75	20.8265	1120.6	20.8715	1120.6	20.8715	103.337
2QZ-9-Spot 79	410.057	86580.9	1.42857	12.9332	1.1371	2.00325	3.42925	0.187987	3.23523	0.943424	1110.46	33.0023	1116.61	23.2299	1129.48	22.6434	1129.48	22.6434	98.3159
2QZ-9-Spot 14	126.877	55532.7	2.63568	12.904	0.824047	1.99598	3.07696	0.186883	2.96456	0.963471	1104.47	30.0915	1114.15	20.8176	1133.94	16.4023	1133.94	16.4023	97.4007
2QZ-9-Spot 44	49.6206	238969	4.28129	12.8897	1.49932	2.00852	3.73579	0.187847	3.42171	0.915929	1109.7	34.8827	1118.39	25.3294	1136.19	29.8269	1136.19	29.8269	97.6686
2QZ-9RUN2-Spot 84	163.979	194798	1.98241	12.8155	1.03145	2.18241	2.60972	0.202936	2.39724	0.918581	1191.08	26.0705	1175.45	18.174	1147.65	20.4899	1147.65	20.4899	103.784
2QZ-9RUN2-Spot 61	39.343	3667.34	3.72272	12.7936	1.80703	2.04128	3.62823	0.189489	3.14622	0.86715	1118.6	32.3097	1129.39	24.7318	1151.05	35.8994	1151.05	35.8994	97.1811
2QZ-9-Spot 154	198.221	90711.6	2.84643	12.7469	0.912482	2.21	2.48081	0.204401	2.3069	0.929899	1198.92	25.2384	1184.21	17.3441	1158.29	18.1034	1158.29	18.1034	103.508
2QZ-9-Spot 28	104.747	67178.2	1.75733	12.73	1.1071	2.12641	2.81212	0.19641	2.58503	0.919244	1156.01	27.3571	1157.42	19.4231	1160.91	21.9524	1160.91	21.9524	99.5775
2QZ-9-Spot 10	109.537	87031.6	2.32862	12.6981	1.11929	2.14366	2.82742	0.197507	2.59644	0.918307	1161.92	27.606	1163.01	19.5792	1165.88	22.1751	1165.88	22.1751	99.6598
2QZ-9-Spot 142	247.458	233212	3.17768	12.6909	0.785597	2.02237	2.5621	0.186227	2.43869	0.951831	1100.9	24.6803	1123.06	17.4093	1167.01	15.5788	1167.01	15.5788	94.3355
2QZ-9-Spot 138	193.444	54008.4	1.67265	12.6574	0.945852	2.20217	2.41903	0.202248	2.22645	0.920388	1187.39	24.1448	1181.73	16.8934	1172.28	18.733	1172.28	18.733	101.289
2QZ-9-Spot 128	73.703	25426.9	2.81752	12.6209	1.1909	2.18495	2.11957	0.200087	1.75338	0.827233	1175.79	18.8453	1176.26	14.7655	1178	23.5597	1178	23.5597	99.8122
2QZ-9-Spot 30	92.2278	147260	0.965721	12.6112	1.11835	2.19786	2.9497	0.201115	2.72947	0.925339	1181.31	29.4618	1180.36	20.5877	1179.51	22.1124	1179.51	22.1124	100.152
2QZ-9-Spot 95	267.601	205094	3.74424	12.6049	0.774464	2.13369	2.67944	0.195146	2.56508	0.957317	1149.19	26.9998	1159.78	18.5267	1180.5	15.3116	1180.5	15.3116	97.3481
2QZ-9-Spot 195	42.8992	7988.41	1.40074	12.5901	1.18978	2.23275	2.95435	0.203967	2.70418	0.915323	1196.59	29.5326	1191.38	20.7215	1182.82	23.5336	1182.82	23.5336	101.164
2QZ-9-Spot 119	95.6962	3.64788e+06	3.08217	12.5424	0.942917	2.14109	2.6995	0.194852	2.52947	0.937014	1147.61	26.5914	1162.18	18.686	1190.3	18.6149	1190.3	18.6149	96.4132
2QZ-9-Spot 104	202.233	824705	3.9259	12.5201	0.987645	2.19216	2.77999	0.199144	2.59864	0.934764	1170.72	27.8204	1178.55	19.3872	1193.84	19.4876	1193.84	19.4876	98.0639
2QZ-9RUN2-Spot 9	199.219	36429.3	3.62511	12.507	1.00239	1.91292	2.91452	0.173594	2.73672	0.938996	1031.89	26.0957	1085.6	19.4365	1195.87	19.7724	1195.87	19.7724	86.2873
2QZ-9-Spot 60	170.286	77548.4	1.8808	12.4698	1.2711	2.3269	2.83287	0.210535	2.53169	0.893684	1231.67	28.3843	1220.53	20.1211	1201.74	25.0344	1201.74	25.0344	102.49
2QZ-9RUN2-Spot 79	226.687	10165.6	1.20366	12.3864	1.09539	2.36985	2.80559	0.212988	2.58292	0.920633	1244.72	29.2369	1233.56	20.0365	1214.94	21.5665	1214.94	21.5665	102.451
2QZ-9-Spot 211	304.584	87655.6	2.94385	12.3201	0.978785	2.28696	2.80465	0.204438	2.62831	0.937128	1199.12	28.7591	1208.27	19.8165	1225.5	19.2244	1225.5	19.2244	97.8472
2QZ-9-Spot 54	279.948	54359.8	2.36222	12.2643	0.837243	2.3134	2.36035	0.205865	2.20687	0.934976	1206.75	24.2873	1216.4	16.7349	1234.45	16.4093	1234.45	16.4093	97.7563
2QZ-9-Spot 161	46.609	9537.1	0.661073	12.1714	1.30473	2.40375	2.88984	0.212285	2.57853	0.892276	1240.98	29.1077	1243.72	20.725	1249.3	25.5395	1249.3	25.5395	99.3337
2QZ-9-Spot 149	339.151	174997	1.94811	12.115	1.09668	2.45098	3.38764	0.215452	3.20522	0.94615	1257.8	36.6262	1257.71	24.4348	1258.44	21.4206	1258.44	21.4206	99.949
2QZ-9RUN2-Spot 109	943.926	90405.1	6.77053	12.0688	1.24473	2.17917	3.32712	0.190828	3.08551	0.927382	1125.86	31.8744	1174.41	23.1607	1265.87	24.2896	1265.87	24.2896	88.9397
2QZ-9-Spot 76	548.246	116598	4.23312	12.0173	1.09649	2.13713	2.70394	0.186348	2.47164	0.914088	1101.56	25.0276	1160.89	18.7057	1274.22	21.3873	1274.22	21.3873	86.4497
2QZ-9RUN2-Spot 27	48.7194	27329.2	2.98861	12.0141	1.36528	2.31874	2.9825	0.20213	2.65166	0.889074	1186.75	28.7421	1218.04	21.1618	1274.73	26.6284	1274.73	26.6284	93.0984
2QZ-9-Spot 157	64.0106	19453.5	1.59071	11.9518	1.07923	2.39504	2.86832	0.207699	2.65755	0.926515	1216.55	29.463	1241.12	20.5487	1284.86	21.0197	1284.86	21.0197	94.6835
2QZ-9RUN2-Spot 69	16.6382	10127.5	1.78767	11.7297	1.73745	2.68238	3.41868	0.228295	2.94426	0.861227	1325.55	35.277	1323.61	25.2912	1321.29	33.666	1321.29	33.666	100.323
2QZ-9RUN2-Spot 26	250.298	528636	4.24559	11.652	0.998095	2.65161	2.54457	0.224181	2.34065	0.919861	1303.93	27.6319	1315.09	18.7637	1334.16	19.3044	1334.16	19.3044	97.7341
2QZ-9-Spot 197	50.6801	23717.8	1.00284	11.6013	1.33997	2.73882	2.68387	0.230546	2.32544	0.866448	1337.36	28.0857	1339.06	19.9654	1342.6	25.8876	1342.6	25.8876	99.6097
2QZ-9RUN2-Spot 93	324.215	204650	3.69313	11.4954	1.23527	2.75734	2.09852	0.229985	1.69643	0.808396	1334.42	20.4483	1344.07	15.6382	1360.29	23.8053	1360.29	23.8053	98.0982
2QZ-9RUN2-Spot 72	78.9301	162450	2.2354	11.3683	1.21333	2.86054	2.78232	0.235956	2.50382	0.899904	1365.64	30.8143	1371.59	20.9362	1381.69	23.3131	1381.69	23.3131	98.8385
2QZ-9-Spot 200	97.1476	322654	4.24973	11.3446	1.10643	2.84527	2.72828	0.234206	2.49386	0.914078	1356.51	30.5073	1367.56	20.501	1385.69	21.2474	1385.69	21.2474	97.8936
2QZ-9-Spot 160	129.211	41538	1.77362	11.3211	0.983071	2.89126	2.51801	0.237499	2.31817	0.920639	1373.68	28.6804	1379.63	18.9992	1389.67	18.8669	1389.67	18.8669	98.8496
2QZ-9-Spot 23	184.294	77263.9	2.2926	11.2988	0.882726	2.86566	2.33033	0.234933	2.15667	0.925479	1360.3	26.4487	1372.93	17.5425	1393.46	16.9323	1393.46	16.9323	97.6204
2QZ-9-Spot 170	104.626	77088.2	2.06127	11.2813	1.10435	2.89649	3.12503	0.237093	2.92339	0.935477	1371.57	36.1182	1381	23.5917	1396.42	21.1751	1396.42	21.1751	98.22
2QZ-9RUN2-Spot 19	367.829	51352.7	3.32923	11.2531	1.07919	2.85282	2.63579	0.232934	2.40473	0.912338	1349.86	29.2875	1369.56	19.8195	1401.23	20.6792	1401.23	20.6792	96.3341
2QZ-9-Spot 150	182.1	173945	1.22604	11.1869	0.893964	3.15716	2.84698	0.256268	2.70299	0.949422	1470.72	35.545	1446.75	21.9574	1412.52	17.1035	1412.52	17.1035	104.121
2QZ-9-Spot 167	426.52	162756	2.9936	11.1854	0.968442	2.94809	3.71293	0.239266	3.58441	0.965385	1382.88	44.6128	1394.36	28.1586	1412.77	18.5278	1412.77	18.5278	97.8845
2QZ-9RUN2-Spot 29	70.0447	19019.7	2.29874	11.1073	0.851161	3.20481	2.62849	0.258285	2.48686	0.946118	1481.06	32.9074	1458.32	20.3446	1426.16	16.2544	1426.16	16.2544	103.849
2QZ-9-Spot 61	374.565	680113	1.92521	11.0586	1.02021	3.01743	3.57007	0.242117	3.42119	0.958299	1397.69	42.9897	1412.04	27.2332	1434.56	19.4607	1434.56	19.4607	97.4302
2QZ-9-Spot 53	111.648	275599	3.11715	11.0557	1.13477	3.00301	2.85931	0.240896	2.62449	0.917876	1391.35	32.8444	1408.38	21.7835	1435.06	21.6446	1435.06	21.6446	96.9542
2QZ-9RUN2-Spot 42	339.459	31258	2.36239	11.0317	1.14255	3.1653	3.03485	0.253365	2.81156	0.926426	1455.81	36.6387	1448.74	23.4214	1439.19	21.7809	1439.19	21.7809	101.154
2QZ-9-Spot 58	143.168	73586.5	1.18566	10.9986	0.96256	3.09939	2.79881	0.247345	2.62808	0.939	1424.77	33.5952	1432.54	21.4895	1444.92	18.3353	1444.92	18.3353	98.6054
2QZ-9-Spot 46	52.6327	11592.3	2.82491	10.988	1.13834	3.20861	2.80283	0.255814	2.56126	0.913811	1468.39	33.6337	1459.24	21.7006	1446.76	21.6785	1446.76	21.6785	101.496
2QZ-9RUN2-Spot 98	767.659	69268.5	1.61744	10.9668	0.976861	3.15308	2.66311	0.2509	2.47748	0.930295	1443.12	32.034	1445.75	20.5326	1450.44	18.5938	1450.44	18.5938	99.4949
2QZ-9RUN2-Spot 16	87.6245	11137.4	2.01945	10.946	1.17314	3.14686	3.27913	0.24993	3.0621	0.933814	1438.12	39.4709	1444.23	25.2718	1454.06	22.3191	1454.06	22.3191	98.9038
2QZ-9RUN2-Spot 66	75.8141	8005.46	2.16068	10.8832	1.19958	3.1491	2.73451	0.248674	2.45734	0.898641	1431.64	31.5478	1444.78	21.0767	1464.98	22.7888	1464.98	22.7888	97.7236
2QZ-9RUN2-Spot 4	257.822	61417.9	1.8599	10.8724	0.96692	3.27889	3.00908	0.258667	2.8495	0.946966	1483.02	37.7504	1476.06	23.4173	1466.87	18.3639	1466.87	18.3639	101.101
2QZ-9-Spot 111	191.145	73831.4	1.9473	10.8503	0.968312	3.15927	2.59074	0.248724	2.40298	0.927526	1431.89	30.8548	1447.27	19.9839	1470.73	18.3809	1470.73	18.3809	97.359
2QZ-9-Spot 98	89.252	50998.7	3.02744	10.8469	0.917349	3.308	2.74385	0.260351	2.58596	0.942456	1491.64	34.4359	1482.94	21.3966	1471.33	17.412	1471.33	17.412	101.38
2QZ-9RUN2-Spot 81	385.637	62687.3	1.84308	10.8462	0.951874	3.16418	2.30942	0.249015	2.10413	0.911107	1433.39	27.0428	1448.46	17.8201	1471.46	18.067	1471.46	18.067	97.4129
2QZ-9RUN2-Spot 63	469.577	2.27642e+06	2.76085	10.8365	1.0058	3.41771	3.05601	0.268728	2.88576	0.944287	1534.34	39.4029	1508.47	24.0107	1473.14	19.0864	1473.14	19.0864	104.154
2QZ-9RUN2-Spot 7	349.277	148109	3.78826	10.8358	0.974386	3.25569	2.94503	0.255971	2.77917	0.943681	1469.19	36.5131	1470.54	22.8806	1473.28	18.4898	1473.28	18.4898	99.7227
2QZ-9-Spot 29	113.807	73524.3	3.6341	10.8055	0.971884	3.33706	2.32339	0.261636	2.11036	0.908307	1498.21	28.2124	1489.77	18.1538	1478.58	18.4292	1478.58	18.4292	101.327
2QZ-9-Spot 66	18.7918	31949.1	1.88842	10.7988	1.57176	2.85573	3.77377	0.223758	3.43087	0.909137	1301.7	40.4401	1370.32	28.3876	1479.76	29.8007	1479.76	29.8007	87.9669
2QZ-9-Spot 24	342.198	353682	2.03799	10.7848	0.936916	3.12118	3.27021	0.244241	3.13312	0.95808	1408.71	39.6475	1437.93	25.1531	1482.22	17.7575	1482.22	17.7575	95.0403
2QZ-9-Spot 35	334.796	132403	1.79823	10.7367	1.01064	3.21268	2.84037	0.25028	2.65448	0.934557	1439.92	34.2548	1460.22	21.9979	1490.68	19.1332	1490.68	19.1332	96.5947
2QZ-9RUN2-Spot 39	165.769	18446.2	2.64948	10.7158	1.30827	3.30254	2.68473	0.25678	2.3444	0.873235	1473.35	30.8784	1481.65	20.9274	1494.37	24.7544	1494.37	24.7544	98.5929
2QZ-9-Spot 169	297.428	119361	2.14873	10.6783	1.20747	3.32007	3.10888	0.25724	2.86481	0.921494	1475.71	37.7868	1485.78	24.2646	1501	22.8267	1501	22.8267	98.3149
2QZ-9-Spot 49	470.282	79877.8	3.02343	10.6641	0.924411	3.29778	2.94537	0.255173	2.79654	0.949472	1465.1	36.6501	1480.53	22.952	1503.51	17.4691	1503.51	17.4691	97.445
2QZ-9RUN2-Spot 76	244.053	26984.1	1.57534	10.6555	1.06512	3.36719	2.9029	0.260334	2.70044	0.930255	1491.55	35.9586	1496.8	22.7301	1505.04	20.1245	1505.04	20.1245	99.1036
2QZ-9-Spot 183	287.703	155849	2.43575	10.6528	0.973647	3.38992	3.2322	0.262025	3.08207	0.95355	1500.2	41.2517	1502.07	25.3485	1505.52	18.3948	1505.52	18.3948	99.6466
2QZ-9RUN2-Spot 53	215.992	33278.7	0.997879	10.6183	1.33885	3.33555	2.58397	0.256986	2.21006	0.855297	1474.4	29.1276	1489.41	20.1882	1511.65	25.275	1511.65	25.275	97.5357
2QZ-9-Spot 209	247.187	1.36124e+06	2.0393	10.6151	0.968522	3.37634	2.69628	0.26005	2.51633	0.933258	1490.1	33.4779	1498.92	21.1248	1512.23	18.2817	1512.23	18.2817	98.5366
2QZ-9-Spot 185	185.581	65602.3	3.17349	10.5864	1.04312	3.43326	3.23187	0.26372	3.0589	0.946481	1508.85	41.1511	1512.04	25.419	1517.33	19.6766	1517.33	19.6766	99.4411
2QZ-9-Spot 207	84.6935	31879.4	2.66412	10.5427	1.07444	3.39802	3.12628	0.259937	2.93584	0.939087	1489.52	39.0459	1503.94	24.5307	1525.12	20.2466	1525.12	20.2466	97.6657
2QZ-9-Spot 68	381.225	95391.6	2.27666	10.5384	0.912833	3.43143	2.61167	0.262383	2.44694	0.936928	1502.02	32.7862	1511.62	20.537	1525.9	17.1992	1525.9	17.1992	98.4353
2QZ-9RUN2-Spot 31	219.515	13639.4	2.46504	10.5363	1.47369	3.32483	2.54693	0.254182	2.07729	0.815603	1460.01	27.1395	1486.9	19.884	1526.27	27.767	1526.27	27.767	95.6586
2QZ-9-Spot 109	105.425	54293.2	2.17676	10.5142	0.916071	3.37493	2.7557	0.257471	2.59898	0.943129	1476.89	34.3048	1498.59	21.5884	1530.23	17.2503	1530.23	17.2503	96.5144
2QZ-9RUN2-Spot 108	430.528	34374.8	0.447982	10.3781	1.20489	3.54196	3.43505	0.266716	3.2168	0.936464	1524.11	43.6635	1536.64	27.2061	1554.72	22.6166	1554.72	22.6166	98.0312
2QZ-9-Spot 1	171.012	1.11892e+06	1.19128	10.3183	1.06119	3.5705	2.98413	0.267315	2.78907	0.934634	1527.16	37.9246	1543	23.6751	1565.57	19.8905	1565.57	19.8905	97.5466
2QZ-9-Spot 151	263.402	98108.5	1.55459	10.2855	0.915771	3.25426	3.13555	0.242864	2.99884	0.9564	1401.57	37.776	1470.19	24.3587	1571.53	17.1511	1571.53	17.1511	89.1851
2QZ-9RUN2-Spot 30	278.856	39938	2.48759	10.1981	1.05417	3.41632	2.74082	0.252794	2.52998	0.923076	1452.87	32.9099	1508.16	21.5314	1587.49	19.7024	1587.49	19.7024	91.52
2QZ-9-Spot 145	71.7882	26936.2	1.99301	10.1858	0.943377	3.90997	3.14187	0.288973	2.99689	0.953857	1636.39	43.3121	1615.75	25.4099	1589.75	17.6263	1589.75	17.6263	102.934
2QZ-9-Spot 59	789.872	102470	0.695415	10.1726	0.803327	3.69624	2.55002	0.272823	2.42018	0.949082	1555.12	33.4412	1570.56	20.3817	1592.16	15.0061	1592.16	15.0061	97.6731
2QZ-9-Spot 74	129.602	34733.5	1.13255	10.1706	1.04418	3.99914	2.79773	0.295123	2.59557	0.927741	1667.08	38.1284	1634.02	22.729	1592.53	19.5029	1592.53	19.5029	104.681
2QZ-9-Spot 201	573.097	158486	0.927976	10.1628	0.740119	3.69758	2.57057	0.272658	2.46172	0.957654	1554.28	33.999	1570.85	20.5476	1593.97	13.8221	1593.97	13.8221	97.5098
2QZ-9RUN2-Spot 5	331.226	70716.3	1.28952	10.1567	1.18285	3.78005	2.59148	0.278572	2.30579	0.889755	1584.17	32.3857	1588.52	20.8115	1595.09	22.086	1595.09	22.086	99.315
2QZ-9-Spot 171	134.728	38142.9	1.34081	10.1368	1.13229	3.59895	3.22133	0.264706	3.01577	0.936189	1513.87	40.6908	1549.3	25.602	1598.76	21.1332	1598.76	21.1332	94.6906
2QZ-9RUN2-Spot 14	195.817	899392	2.15982	10.1289	1.10217	3.70832	2.76304	0.272536	2.5337	0.916996	1553.66	34.981	1573.16	22.1002	1600.21	20.5655	1600.21	20.5655	97.091
2QZ-9-Spot 205	194.599	202353	1.42822	10.0917	1.00065	3.75727	2.65457	0.27512	2.45874	0.926231	1566.74	34.1985	1583.67	21.2913	1607.08	18.6545	1607.08	18.6545	97.49
2QZ-9RUN2-Spot 96	331.183	755465	1.70212	10.0579	0.987838	3.41473	2.40612	0.249201	2.19399	0.911837	1434.35	28.2145	1507.79	18.8995	1613.33	18.4006	1613.33	18.4006	88.9064
2QZ-9-Spot 72	148.315	83348.2	1.62069	10.0529	0.911224	3.8474	2.91476	0.280637	2.76866	0.949877	1594.57	39.1122	1602.72	23.4946	1614.25	16.9713	1614.25	16.9713	98.7806
2QZ-9-Spot 63	169.643	71772.4	3.98154	10.043	0.95109	4.01521	2.42273	0.292591	2.22823	0.919722	1654.46	32.5149	1637.28	19.6974	1616.08	17.7097	1616.08	17.7097	102.375
2QZ-9-Spot 182	63.8554	22977.5	2.44854	10.04	1.14041	4.03427	2.88653	0.293893	2.6517	0.918647	1660.95	38.8274	1641.13	23.4915	1616.63	21.2339	1616.63	21.2339	102.742
2QZ-9-Spot 42	368.483	965807	3.16926	10.0382	1.10707	3.97439	2.80098	0.289475	2.57291	0.918577	1638.91	37.2346	1628.98	22.727	1616.98	20.6121	1616.98	20.6121	101.356
2QZ-9RUN2-Spot 68	150.03	18053.6	3.2239	10.0347	0.978362	4.07135	2.88595	0.296436	2.71505	0.940783	1673.61	40.0204	1648.58	23.5294	1617.62	18.214	1617.62	18.214	103.461
2QZ-9RUN2-Spot 105	230.444	47808	1.03839	10.0212	0.840107	4.14752	2.66762	0.301575	2.53188	0.949116	1699.11	37.8175	1663.72	21.8279	1620.13	15.6347	1620.13	15.6347	104.875
2QZ-9-Spot 51	252.721	76286.1	9.75926	10.0074	1.07864	3.96126	3.36367	0.287634	3.18604	0.94719	1629.7	45.8801	1626.3	27.2766	1622.7	20.0679	1622.7	20.0679	100.431
2QZ-9-Spot 26	101.648	52093	0.990598	10.0038	1.08035	4.03736	3.12702	0.293054	2.93447	0.938423	1656.78	42.8732	1641.75	25.4534	1623.37	20.098	1623.37	20.098	102.058
2QZ-9-Spot 91	189.657	75851.4	1.21489	9.98857	1.11326	4.01616	3.08393	0.291073	2.87599	0.932571	1646.89	41.7987	1637.47	25.0763	1626.19	20.7028	1626.19	20.7028	101.273
2QZ-9-Spot 37	166.18	95132.6	2.66571	9.98448	0.890496	4.07697	2.43169	0.29536	2.26277	0.930534	1668.26	33.2601	1649.71	19.8301	1626.95	16.558	1626.95	16.558	102.539
2QZ-9-Spot 120	407.154	667129	4.98385	9.97095	0.750207	4.05019	2.51243	0.293021	2.39781	0.954379	1656.61	35.0292	1644.34	20.4621	1629.48	13.9446	1629.48	13.9446	101.665
2QZ-9-Spot 96	54.52	79040.6	1.91533	9.96527	1.15192	4.1499	3.22387	0.300064	3.01105	0.933986	1691.63	44.8016	1664.19	26.3842	1630.53	21.4099	1630.53	21.4099	103.747
2QZ-9RUN2-Spot 59	98.7645	35644.3	2.23344	9.96459	1.03664	3.42808	2.825	0.247856	2.62793	0.93024	1427.41	33.6489	1510.86	22.2102	1630.66	19.2666	1630.66	19.2666	87.5355
2QZ-9-Spot 8	115.537	24866.4	1.53457	9.95594	1.08479	4.06426	2.86199	0.293597	2.64844	0.925383	1659.48	38.7495	1647.16	23.326	1632.27	20.1575	1632.27	20.1575	101.667
2QZ-9-Spot 127	434.104	1.89295e+06	1.55345	9.95566	0.821223	3.99347	2.60084	0.288475	2.46779	0.948842	1633.91	35.6174	1632.87	21.123	1632.33	15.2592	1632.33	15.2592	100.097
2QZ-9RUN2-Spot 51	157.963	35822.3	3.06819	9.93233	0.939513	4.01257	2.88297	0.289176	2.72559	0.94541	1637.41	39.4125	1636.75	23.4374	1636.69	17.4477	1636.69	17.4477	100.044
2QZ-9-Spot 21	401.362	230948	3.07822	9.92267	1.1206	3.94137	3.39986	0.283768	3.20987	0.94412	1610.31	45.7394	1622.22	27.5421	1638.49	20.8063	1638.49	20.8063	98.2802
2QZ-9-Spot 184	84.8521	54251.2	1.68456	9.90233	1.03901	4.11469	2.95997	0.295639	2.77162	0.936367	1669.65	40.7695	1657.22	24.1834	1642.3	19.2836	1642.3	19.2836	101.665
2QZ-9-Spot 114	113.694	214356	1.3857	9.89741	1.24225	4.09532	2.89293	0.294101	2.61264	0.90311	1661.99	38.2764	1653.37	23.6136	1643.22	23.0497	1643.22	23.0497	101.142
2QZ-9RUN2-Spot 34	265.862	35843.7	1.45879	9.89586	0.988332	4.09089	2.51465	0.293737	2.31229	0.919526	1660.18	33.8437	1652.49	20.5207	1643.52	18.34	1643.52	18.34	101.014
2QZ-9RUN2-Spot 78	631.505	75995.5	1.2913	9.89311	0.909754	3.81054	3.00086	0.273532	2.85963	0.952938	1558.7	39.5942	1594.97	24.1407	1644.03	16.8807	1644.03	16.8807	94.8098
2QZ-9-Spot 179	521.385	148819	3.90925	9.89291	1.10927	3.83585	2.81957	0.275343	2.5922	0.919359	1567.87	36.0776	1600.3	22.713	1644.07	20.5812	1644.07	20.5812	95.365
2QZ-9-Spot 85	230.393	254426	2.798	9.89207	0.961782	3.95372	2.40206	0.283779	2.2011	0.916341	1610.37	31.3655	1624.75	19.4689	1644.23	17.8457	1644.23	17.8457	97.9407
2QZ-9RUN2-Spot 88	345.731	106687	1.81994	9.88922	0.806597	3.84956	2.27091	0.276224	2.12284	0.934796	1572.32	29.6192	1603.18	18.3057	1644.76	14.9651	1644.76	14.9651	95.5955
2QZ-9RUN2-Spot 48	225.288	22645.8	1.7	9.88811	0.996123	4.00304	2.53785	0.287204	2.33419	0.919749	1627.54	33.5739	1634.81	20.6211	1644.97	18.4794	1644.97	18.4794	98.9407
2QZ-9-Spot 67	104.747	497354	1.22608	9.88532	0.914551	4.07741	2.55479	0.292457	2.38549	0.933731	1653.8	34.7973	1649.8	20.8348	1645.49	16.9665	1645.49	16.9665	100.505
2QZ-9-Spot 140	242.688	105887	0.897947	9.87979	0.897257	3.90602	3.18202	0.280008	3.0529	0.959421	1591.4	43.0521	1614.93	25.7295	1646.53	16.6417	1646.53	16.6417	96.6518
2QZ-9-Spot 3	97.027	36272.1	0.813363	9.85492	0.980335	3.93492	3.19734	0.28137	3.04334	0.951835	1598.26	43.0802	1620.89	25.8922	1651.2	18.172	1651.2	18.172	96.7935
2QZ-9RUN2-Spot 67	21.1173	6570.16	3.64544	9.85464	1.25591	3.94922	2.78491	0.282384	2.48564	0.892539	1603.36	35.2844	1623.83	22.5677	1651.26	23.2809	1651.26	23.2809	97.0993
2QZ-9RUN2-Spot 10	427.158	245762	1.83468	9.85371	0.882201	4.01125	2.74867	0.286792	2.60325	0.947094	1625.48	37.4022	1636.48	22.3437	1651.43	16.3522	1651.43	16.3522	98.4285
2QZ-9-Spot 122	94.6517	95899.6	1.4328	9.84197	1.21661	4.04311	2.97832	0.288726	2.7185	0.912764	1635.16	39.2626	1642.91	24.2494	1653.64	22.5453	1653.64	22.5453	98.8824
2QZ-9-Spot 78	307.26	207143	1.33598	9.83526	0.941812	4.12128	2.6537	0.294107	2.48095	0.934902	1662.02	36.3476	1658.53	21.6871	1654.91	17.4495	1654.91	17.4495	100.43
2QZ-9-Spot 123	353.645	126618	2.01973	9.82619	0.976672	4.22923	2.21401	0.301532	1.98694	0.897442	1698.9	29.6746	1679.71	18.1836	1656.61	18.0915	1656.61	18.0915	102.553
2QZ-9-Spot 214	172.263	114868	1.15942	9.81741	0.893828	4.0828	3.09956	0.290832	2.96789	0.957518	1645.69	43.1067	1650.87	25.2857	1658.27	16.5533	1658.27	16.5533	99.2412
2QZ-9-Spot 141	50.3459	632953	7.02943	9.81544	1.33521	4.32769	3.19962	0.308215	2.90771	0.908768	1731.92	44.1622	1698.65	26.3963	1658.64	24.7277	1658.64	24.7277	104.418
2QZ-9-Spot 36	348.768	187916	1.50435	9.81276	1.02022	4.16584	2.61878	0.296607	2.41188	0.920993	1674.46	35.5673	1667.33	21.4464	1659.15	18.8923	1659.15	18.8923	100.923
2QZ-9-Spot 163	79.5054	336230	1.70628	9.80019	1.00591	4.25814	2.73034	0.30279	2.53828	0.929659	1705.13	38.0304	1685.31	22.4546	1661.52	18.6216	1661.52	18.6216	102.625
2QZ-9RUN2-Spot 44	230.214	48055.1	1.58297	9.78899	1.08872	4.02299	2.91459	0.285742	2.70361	0.927613	1620.22	38.7336	1638.85	23.7068	1663.63	20.1493	1663.63	20.1493	97.3902
2QZ-9-Spot 27	192.796	64824.2	0.698208	9.75725	0.957501	4.14137	2.76842	0.293196	2.59757	0.938284	1657.48	37.9651	1662.51	22.6464	1669.64	17.7069	1669.64	17.7069	99.2716
2QZ-9-Spot 139	78.2473	96818	0.839455	9.75582	1.22009	4.09006	3.1761	0.289521	2.9324	0.923271	1639.14	42.4424	1652.32	25.9194	1669.91	22.563	1669.91	22.563	98.1571
2QZ-9-Spot 90	199.505	127274	1.20283	9.72944	1.03295	4.19503	2.62021	0.296149	2.40801	0.919014	1672.19	35.468	1673.05	21.4871	1674.92	19.0896	1674.92	19.0896	99.8368
2QZ-9-Spot 34	490.145	323314	2.19229	9.70268	0.773568	3.80834	1.98014	0.268111	1.82278	0.920533	1531.21	24.8435	1594.51	15.9258	1680.01	14.2879	1680.01	14.2879	91.1429
2QZ-9-Spot 129	220.4	88805	2.19332	9.70022	0.816992	3.59535	2.46594	0.253052	2.32666	0.943522	1454.2	30.2898	1548.5	19.5924	1680.48	15.0891	1680.48	15.0891	86.5349
2QZ-9-Spot 92	271.869	211508	1.37964	9.69956	0.932915	4.10138	2.49842	0.288649	2.31771	0.927669	1634.78	33.4669	1654.58	20.3984	1680.6	17.2299	1680.6	17.2299	97.2732
2QZ-9RUN2-Spot 92	316.904	101061	6.22797	9.69897	1.16687	3.89838	2.66026	0.274345	2.39069	0.898668	1562.82	33.1785	1613.35	21.5006	1680.72	21.549	1680.72	21.549	92.9854
2QZ-9RUN2-Spot 73	331.198	62815.6	3.42483	9.67962	0.786524	4.10539	2.42489	0.288337	2.29379	0.945936	1633.21	33.0938	1655.38	19.8017	1684.4	14.5191	1684.4	14.5191	96.9611
2QZ-9-Spot 174	234.925	79590	1.84695	9.67786	1.10957	4.32791	3.10797	0.30391	2.90315	0.934101	1710.67	43.6207	1698.69	25.6401	1684.74	20.4803	1684.74	20.4803	101.539
2QZ-9-Spot 204	70.1237	21883.3	0.972439	9.67255	1.27786	4.09441	2.73121	0.287355	2.41383	0.883796	1628.3	34.7336	1653.19	22.2921	1685.75	23.5822	1685.75	23.5822	96.592
2QZ-9RUN2-Spot 45	328.298	35354.6	1.93374	9.64024	1.16445	4.01677	2.62402	0.280965	2.3515	0.896143	1596.22	33.2493	1637.6	21.336	1691.92	21.4737	1691.92	21.4737	94.3436
2QZ-9RUN2-Spot 25	418.643	1.02076e+06	1.20848	9.60813	0.985177	4.19219	2.92737	0.292259	2.75662	0.941669	1652.81	40.19	1672.49	24.0037	1698.07	18.1531	1698.07	18.1531	97.3343
2QZ-9-Spot 156	788.104	274101	4.16128	9.60563	0.922821	4.14777	2.91949	0.289086	2.7698	0.948729	1636.96	40.0422	1663.77	23.8898	1698.55	17.003	1698.55	17.003	96.3739
2QZ-9-Spot 39	262.726	62893.9	3.40155	9.53041	0.721607	4.4326	3.15151	0.30652	3.06778	0.973433	1723.56	46.3973	1718.45	26.1153	1713.02	13.2709	1713.02	13.2709	100.615
2QZ-9RUN2-Spot 87	99.5649	16077.3	1.77039	9.52045	1.35047	4.17543	2.99032	0.288434	2.66801	0.892213	1633.7	38.503	1669.21	24.5012	1714.95	24.8324	1714.95	24.8324	95.2624
2QZ-9-Spot 193	115.713	572261	1.40403	9.49195	1.06117	4.15138	2.86887	0.285914	2.6654	0.929075	1621.08	38.204	1664.48	23.4794	1720.46	19.4986	1720.46	19.4986	94.2238
2QZ-9-Spot 110	34.737	58032.4	1.3922	9.49011	1.16844	4.33273	2.80012	0.298347	2.54468	0.908777	1683.1	37.6953	1699.61	23.1043	1720.81	21.4671	1720.81	21.4671	97.8087
2QZ-9RUN2-Spot 85	83.0198	14481.2	1.95545	9.4797	1.1189	4.48506	2.40712	0.308497	2.13127	0.885402	1733.3	32.392	1728.21	19.9881	1722.83	20.5515	1722.83	20.5515	100.608
2QZ-9RUN2-Spot 50	89.372	21729.5	2.24462	9.45044	0.943854	4.37386	2.98892	0.299919	2.83598	0.948831	1690.91	42.1809	1707.41	24.7063	1728.51	17.3251	1728.51	17.3251	97.8248
2QZ-9-Spot 147	578.057	474286	2.82771	9.43884	1.06536	4.42332	2.75201	0.302939	2.53744	0.92203	1705.87	38.032	1716.72	22.7948	1730.76	19.5502	1730.76	19.5502	98.5616
2QZ-9RUN2-Spot 40	133.746	12267.1	2.97538	9.40471	1.0398	4.54268	2.5049	0.309988	2.27889	0.909773	1740.65	34.7634	1738.82	20.8484	1737.41	19.0652	1737.41	19.0652	100.186
2QZ-9-Spot 143	198.089	107745	1.97196	9.40083	0.997602	4.53256	2.78845	0.30917	2.60389	0.933813	1736.62	39.6413	1736.97	23.1999	1738.16	18.2897	1738.16	18.2897	99.9113
2QZ-9-Spot 131	586.019	100540	2.55217	9.39324	0.894085	4.1496	2.71452	0.28282	2.56305	0.9442	1605.55	36.427	1664.13	22.2139	1739.64	16.3886	1739.64	16.3886	92.2918
2QZ-9-Spot 215	427.051	974058	3.94535	9.38925	1.1475	3.82223	3.22933	0.260397	3.01857	0.934738	1491.87	40.2026	1597.44	25.9959	1740.42	21.0325	1740.42	21.0325	85.7189
2QZ-9RUN2-Spot 97	238.996	200045	2.99682	9.34252	0.880955	4.59326	1.8527	0.311367	1.62985	0.879717	1747.43	24.947	1748.05	15.4499	1749.56	16.1279	1749.56	16.1279	99.8784
2QZ-9-Spot 22	297.728	63520.8	3.02746	9.33649	0.981356	4.48027	3.00529	0.303512	2.84054	0.945182	1708.7	42.637	1727.32	24.952	1750.74	17.9636	1750.74	17.9636	97.5986
2QZ-9RUN2-Spot 36	726.028	368327	4.18575	9.32547	0.986033	4.36555	3.22897	0.295391	3.07474	0.952234	1668.41	45.1991	1705.84	26.682	1752.9	18.0443	1752.9	18.0443	95.1799
2QZ-9-Spot 178	300.459	235877	2.4644	9.31507	1.15299	4.63496	2.63178	0.313271	2.36577	0.898925	1756.78	36.3799	1755.59	21.9838	1754.94	21.0947	1754.94	21.0947	100.105
2QZ-9-Spot 11	217.104	62989.2	2.58454	9.27834	1.07614	4.81681	3.49883	0.324278	3.32923	0.951525	1810.59	52.5545	1787.84	29.4272	1762.17	19.6709	1762.17	19.6709	102.748
2QZ-9-Spot 13	102.189	2.69772e+07	2.62666	9.24476	0.887943	4.78395	2.98931	0.3209	2.85438	0.954865	1794.12	44.703	1782.08	25.1102	1768.8	16.217	1768.8	16.217	101.432
2QZ-9RUN2-Spot 24	208.739	59685.1	3.97122	9.23551	0.88634	4.95366	2.74882	0.331952	2.602	0.946589	1847.84	41.8041	1811.45	23.2271	1770.62	16.184	1770.62	16.184	104.361
2QZ-9-Spot 43	51.6936	5605.92	2.80407	9.17945	2.20166	4.48994	3.91286	0.299051	3.23469	0.82668	1686.6	48.004	1729.11	32.5047	1781.73	40.149	1781.73	40.149	94.6608
2QZ-9RUN2-Spot 17	295.716	40860	3.13425	9.09526	0.951109	4.66651	2.71865	0.30796	2.54685	0.936807	1730.66	38.6569	1761.26	22.7369	1798.52	17.309	1798.52	17.309	96.2272
2QZ-9-Spot 77	221.771	90941.5	1.48998	9.09081	0.636501	4.76443	2.67749	0.314269	2.60074	0.971333	1761.68	40.0901	1778.65	22.4742	1799.41	11.5821	1799.41	11.5821	97.9034
2QZ-9-Spot 99	217.602	225285	2.29618	8.95902	0.934759	5.17612	2.4604	0.336475	2.27591	0.925019	1869.69	36.9378	1848.7	20.9404	1825.93	16.9526	1825.93	16.9526	102.396
2QZ-9-Spot 17	51.6656	59026	1.46112	8.90645	1.26529	5.13136	2.95789	0.331608	2.67361	0.903889	1846.17	42.9211	1841.31	25.1406	1836.6	22.9164	1836.6	22.9164	100.521
2QZ-9-Spot 101	203.581	220591	2.43198	8.82618	0.859571	5.19731	1.79922	0.332843	1.58061	0.878498	1852.15	25.4452	1852.18	15.3223	1852.98	15.5377	1852.98	15.5377	99.9549
2QZ-9-Spot 97	199.375	165622	2.09817	8.79151	0.946643	5.28463	2.66113	0.337106	2.48707	0.934589	1872.73	40.4214	1866.38	22.725	1860.09	17.0971	1860.09	17.0971	100.679
2QZ-9RUN2-Spot 90	145.686	496658	2.65798	8.72608	0.87927	5.2957	2.43126	0.335298	2.26669	0.932313	1864.01	36.6918	1868.17	20.7683	1873.57	15.8563	1873.57	15.8563	99.4896
2QZ-9-Spot 153	302.829	74306.7	3.45998	8.72544	0.827575	5.39237	2.62762	0.341393	2.4939	0.949108	1893.37	40.9168	1883.64	22.5103	1873.7	14.9237	1873.7	14.9237	101.049
2QZ-9-Spot 175	1885.57	27542.3	42.8462	8.63699	0.800676	5.21187	2.50836	0.326621	2.37714	0.947686	1821.98	37.7289	1854.56	21.3725	1892.05	14.405	1892.05	14.405	96.2964
2QZ-9-Spot 31	969.352	310856	14.5018	8.62753	0.990559	5.47459	3.00378	0.34271	2.83575	0.944061	1899.69	46.6593	1896.62	25.7947	1894.02	17.8176	1894.02	17.8176	100.299
2QZ-9-Spot 20	384.649	187081	0.970797	8.47236	0.976262	5.44414	3.20657	0.334673	3.05434	0.952526	1860.99	49.3731	1891.83	27.5132	1926.61	17.4924	1926.61	17.4924	96.5942
2QZ-9-Spot 152	439.004	319649	99.8235	8.23922	0.907248	5.79906	3.48891	0.346682	3.36889	0.965599	1918.74	55.9091	1946.27	30.2243	1976.46	16.1606	1976.46	16.1606	97.0797
2QZ-9RUN2-Spot 82	592.474	9.83977e+06	13.9695	8.13031	0.898935	5.78113	2.52949	0.341042	2.36437	0.934721	1891.68	38.7618	1943.59	21.8998	2000.12	15.9684	2000.12	15.9684	94.5781
2QZ-9RUN2-Spot 3	70.7994	15882.3	3.77021	8.02459	0.853356	6.39197	2.16851	0.372173	1.99355	0.919316	2039.62	34.8566	2031.17	19.0422	2023.35	15.1179	2023.35	15.1179	100.804
2QZ-9RUN2-Spot 47	524.596	619186	12.4041	7.76172	0.860668	6.68915	2.50377	0.376718	2.35119	0.939061	2060.93	41.4747	2071.19	22.12	2082.15	15.1455	2082.15	15.1455	98.981
2QZ-9RUN2-Spot 100	110.846	100817	3.59582	7.63881	1.31734	6.52343	3.46939	0.361568	3.20956	0.925108	1989.6	54.9446	2049.07	30.5544	2110.2	23.1104	2110.2	23.1104	94.285
2QZ-9RUN2-Spot 21	126.83	56493.6	1.24886	7.40308	0.918345	7.13849	2.69595	0.383448	2.53472	0.940195	2092.37	45.2897	2128.86	24.0152	2165.02	16.0139	2165.02	16.0139	96.6445
2QZ-9RUN2-Spot 35	55.619	14562.5	3.46477	7.36416	0.935038	7.29583	2.81823	0.389839	2.6586	0.943356	2122.08	48.0728	2148.3	25.1716	2174.2	16.2861	2174.2	16.2861	97.6027
2QZ-9RUN2-Spot 58	454.788	119874	1.75583	7.16481	1.27983	7.73869	2.66802	0.402309	2.34102	0.877437	2179.66	43.2958	2201.11	23.995	2221.88	22.177	2221.88	22.177	98.1
2QZ-9RUN2-Spot 11	124.374	33325.8	2.76546	7.09769	0.724287	7.73606	2.13002	0.398405	2.0031	0.940412	2161.69	36.7888	2200.8	19.1544	2238.17	12.5295	2238.17	12.5295	96.5829
2QZ-9-Spot 64	115.24	127830	1.86621	6.53503	1.07719	9.5293	3.07277	0.451852	2.87777	0.93654	2403.48	57.7379	2390.38	28.2445	2379.96	18.3549	2379.96	18.3549	100.989
2QZ-9-Spot 202	998.546	413552	4.14507	6.5229	1.11749	9.56176	2.89013	0.45255	2.66534	0.922223	2406.58	53.5324	2393.5	26.5734	2383.12	19.0355	2383.12	19.0355	100.984
2QZ-9-Spot 48	49.9832	100649	2.47444	6.49945	0.977972	8.86528	2.77465	0.418078	2.59659	0.935824	2251.75	49.3499	2324.23	25.3228	2389.25	16.648	2389.25	16.648	94.2449
2QZ-9-Spot 212	605.75	334691	2.18327	6.30798	1.10391	10.3241	2.61056	0.472529	2.36567	0.906193	2494.64	48.9379	2464.26	24.1709	2440.02	18.6949	2440.02	18.6949	102.238
2QZ-9RUN2-Spot 110	253.076	180128	1.39718	6.16802	0.98362	9.75198	2.49677	0.436442	2.29485	0.919129	2334.69	44.9488	2411.63	22.9978	2477.95	16.5937	2477.95	16.5937	94.2189
2QZ-9-Spot 194	601.082	415341	8.84878	5.81357	1.03326	11.6504	3.06621	0.49144	2.88687	0.941511	2576.9	61.323	2576.72	28.6803	2577.3	17.2638	2577.3	17.2638	99.9847
2QZ-9-Spot 106	257.388	1.32623e+06	1.41576	5.76823	0.748271	11.5281	3.09252	0.482491	3.00063	0.970286	2538.11	62.9567	2566.86	28.9023	2590.37	12.483	2590.37	12.483	97.9824
2QZ-9-Spot 125	158.463	831591	1.02051	5.69839	4.4496	10.3695	5.25351	0.428742	2.79292	0.53163	2300.04	54.0292	2468.33	48.6887	2610.67	74.134	2610.67	74.134	88.1016
2QZ-9-Spot 130	296.099	651054	3.06814	5.64194	1.05623	12.0045	3.10871	0.491428	2.92378	0.940511	2576.85	62.106	2604.76	29.1461	2627.24	17.5596	2627.24	17.5596	98.0822
2QZ-9RUN2-Spot 91	66.7167	9967.76	0.828727	5.53418	1.17491	12.5615	2.82866	0.504407	2.57311	0.909657	2632.71	55.6164	2647.34	26.6099	2659.25	19.4739	2659.25	19.4739	99.0021
2QZ-9RUN2-Spot 57	783.021	716722	2.0071	5.51941	1.00734	12.8763	2.8347	0.515669	2.64968	0.93473	2680.78	58.1153	2670.64	26.715	2663.68	16.6919	2663.68	16.6919	100.642
2QZ-9-Spot 83	250.384	2.16021e+06	1.65094	5.50858	1.25491	12.4896	2.91105	0.499203	2.62667	0.902311	2610.37	56.3835	2641.95	27.3738	2666.93	20.7882	2666.93	20.7882	97.8793
2QZ-9-Spot 5	227.871	190803	3.20142	5.48609	1.00504	12.3016	2.41756	0.489678	2.19875	0.90949	2569.28	46.5929	2627.69	22.7058	2673.7	16.6346	2673.7	16.6346	96.0946
2QZ-9-Spot 80	343.848	402616	2.42365	5.40609	0.895316	12.8288	3.17924	0.503219	3.05057	0.959528	2627.61	65.8339	2667.16	29.9558	2697.99	14.7846	2697.99	14.7846	97.3916
2QZ-9-Spot 81	20.9501	35857.6	1.51073	5.29381	1.05345	13.3767	2.80353	0.513813	2.59809	0.926718	2672.89	56.8481	2706.61	26.4926	2732.6	17.3403	2732.6	17.3403	97.8149
2QZ-9RUN2-Spot 6	212.276	34042.5	1.60766	5.28352	0.819217	10.6888	2.25117	0.409768	2.09682	0.931435	2213.86	39.2894	2496.45	20.9054	2735.79	13.4799	2735.79	13.4799	80.9221
2QZ-9-Spot 208	233.01	350372	1.3348	5.24749	1.0467	13.6842	2.08897	0.521023	1.80782	0.865412	2703.52	39.9209	2728.1	19.7691	2747.05	17.2064	2747.05	17.2064	98.4154
2QZ-9RUN2-Spot 15	445.774	205064	6.08535	5.24684	1.01418	13.8251	2.63772	0.526325	2.43496	0.923129	2725.95	54.1286	2737.8	24.9814	2747.25	16.6713	2747.25	16.6713	99.2245
2QZ-9-Spot 73	169.084	99048	1.70112	5.20837	1.0984	13.8956	2.99783	0.525129	2.78936	0.930458	2720.9	61.9149	2742.62	28.4034	2759.35	18.0393	2759.35	18.0393	98.6065
2QZ-9-Spot 158	78.8538	131033	1.64145	4.96676	0.973187	15.2084	2.94227	0.548081	2.77667	0.943715	2817.19	63.3734	2828.38	28.0393	2837.06	15.867	2837.06	15.867	99.2995
2QZ-9-Spot 126	145.664	203551	1.01685	4.92291	0.732942	15.7898	3.03519	0.564009	2.94537	0.970406	2883.18	68.4733	2864.16	28.9912	2851.51	11.9373	2851.51	11.9373	101.11
2QZ-9-Spot 180	252.786	256034	3.00473	4.86258	0.782005	16.6912	3.03412	0.5889	2.93161	0.966215	2984.96	70.0465	2917.26	29.0744	2871.58	12.7095	2871.58	12.7095	103.948
2QZ-9RUN2-Spot 101	134.226	416325	4.40797	4.79831	0.855922	14.9104	2.21778	0.519116	2.04596	0.922525	2695.43	45.0708	2809.54	21.1066	2893.18	13.8853	2893.18	13.8853	93.1649
2QZ-9-Spot 116	293.172	288196	0.821382	4.66086	0.916635	17.4506	2.92868	0.590154	2.78154	0.949758	2990.04	66.5494	2959.94	28.1328	2940.24	14.8093	2940.24	14.8093	101.694
2QZ-9-Spot 165	107.797	1.45179e+06	1.22195	3.35492	0.910512	28.2244	3.06235	0.68706	2.92386	0.954776	3371.39	76.7643	3426.92	30.0393	3460.22	14.1111	3460.22	14.1111	97.433
2QZ-9-Spot 199	342.847	196985	2.0017	3.1613	0.962904	31.6408	2.68014	0.725775	2.5012	0.933232	3517.65	67.811	3539.18	26.3859	3552.05	14.8235	3552.05	14.8235	99.0316
SY-B							Isotope ratios						Apparent ages (Ma)
Analysis	U	206Pb	U/Th	206Pb*	±	207Pb*	±	206Pb*	±	error	206Pb*	±	207Pb*	±	206Pb*	±	Best age	±	Conc
	(ppm)	204Pb		207Pb*	(%)	235U*	(%)	238U	(%)	corr.	238U*	(Ma)	235U	(Ma)	207Pb*	(Ma)	(Ma)	(Ma)	(%)
LEARY SY-B-Spot 203	737.999	46511.8	0.796156	19.1459	1.05808	0.353865	1.78912	0.0491588	1.44271	0.80638	309.355	4.35771	307.624	4.74826	294.495	24.1556	309.355	4.35771	NA
LEARY SY-B-Spot 191	566.043	31769.3	6.00485	18.3588	1.15383	0.38326	1.72432	0.0510534	1.28139	0.743125	320.986	4.01235	329.434	4.85112	389.531	25.9015	320.986	4.01235	NA
LEARY SY-B-Spot 72	571.863	22465	4.25441	18.7637	0.998153	0.375375	1.42408	0.0511061	1.01573	0.71325	321.309	3.18362	323.63	3.9465	340.383	22.6021	321.309	3.18362	NA
LEARY SY-B-Spot 64	281.531	25491.2	2.21186	18.154	1.12513	0.393299	1.63882	0.0518064	1.19155	0.72708	325.603	3.78337	336.776	4.69723	414.646	25.1457	325.603	3.78337	NA
LEARY SY-B-Spot 115	498.593	13171	1.14979	19.0562	0.996052	0.386969	1.44718	0.0535056	1.04987	0.725455	336.008	3.43728	332.153	4.09982	305.232	22.6843	336.008	3.43728	NA
LEARY SY-B-Spot 56	856.79	30579.4	47.4927	18.5767	0.743641	0.444818	1.46972	0.059957	1.26771	0.862549	375.364	4.62262	373.644	4.59449	362.974	16.7586	375.364	4.62262	NA
LEARY SY-B-Spot 215	1047.14	15969.6	222.157	17.572	1.08714	0.470326	1.80144	0.0599665	1.43643	0.797377	375.422	5.23865	391.414	5.85115	487.038	23.9857	375.422	5.23865	NA
LEARY SY-B-Spot 61	281.167	62543.5	6.08832	17.8839	1.04036	0.462601	1.69444	0.0600283	1.33745	0.789317	375.798	4.88242	386.065	5.44179	448.056	23.1223	375.798	4.88242	NA
LEARY SY-B-Spot 91	260.023	24236.6	1.97961	17.6343	1.19223	0.477455	1.6584	0.0610911	1.15277	0.69511	382.257	4.27844	396.325	5.44178	479.205	26.3564	382.257	4.27844	NA
LEARY SY-B-Spot 26	712.691	21904	0.479113	15.3831	2.49303	0.551471	2.86339	0.0615539	1.40847	0.49189	385.069	5.26478	445.96	10.3349	773.601	52.4653	385.069	5.26478	NA
LEARY SY-B-Spot 92	693.314	13707	1.26118	16.3686	1.42168	0.52563	1.77416	0.062428	1.06135	0.598227	390.375	4.0203	428.905	6.20669	641.579	30.5692	390.375	4.0203	NA
LEARY SY-B-Spot 258	293.95	26855.1	2.40301	17.9495	1.23591	0.501847	1.97641	0.0653601	1.54231	0.780359	408.141	6.09967	412.952	6.70593	439.908	27.5116	408.141	6.09967	92.7788
LEARY SY-B-Spot 55	138.112	23405.1	2.08298	18.0906	1.47824	0.50316	2.01543	0.066046	1.36995	0.679732	412.29	5.47135	413.839	6.85024	422.465	32.9938	412.29	5.47135	97.5915
LEARY SY-B-Spot 41	287.348	9479.77	1.25595	18.0566	1.97471	0.511249	2.38153	0.0669816	1.33124	0.558986	417.945	5.38733	419.289	8.18072	426.665	44.0529	417.945	5.38733	97.9564
LEARY SY-B-Spot 16	99.8025	7613.51	1.83558	18.0057	2.34762	0.513408	2.60282	0.0670748	1.124	0.431839	418.508	4.55459	420.738	8.96587	432.957	52.3118	418.508	4.55459	96.6628
LEARY SY-B-Spot 259	540.829	193449	1.3229	17.8051	1.00925	0.522415	1.75742	0.0674913	1.43873	0.81866	421.024	5.86381	426.763	6.1234	457.877	22.3866	421.024	5.86381	91.9513
LEARY SY-B-Spot 290	922.383	59122.4	2.86346	18.0393	0.931743	0.519121	1.31504	0.0679478	0.927995	0.705681	423.78	3.80618	424.564	4.56296	428.803	20.7726	423.78	3.80618	98.8286
LEARY SY-B-Spot 305	210.815	12048.2	0.92047	17.5585	1.70287	0.533592	2.14182	0.0679804	1.29908	0.606534	423.977	5.3306	434.19	7.56692	488.753	37.5955	423.977	5.3306	86.7465
LEARY SY-B-Spot 194	750.135	35103.2	30.1932	18.0719	0.883707	0.521616	1.42681	0.0683978	1.1202	0.785108	426.495	4.62299	426.23	4.96644	424.775	19.7153	426.495	4.62299	100.405
LEARY SY-B-Spot 166	321.51	65028.3	1.05103	17.3795	0.866567	0.54335	1.23832	0.068518	0.884591	0.714347	427.221	3.65665	440.631	4.42671	511.301	19.0585	427.221	3.65665	83.5556
LEARY SY-B-Spot 21	278.226	278181	4.94179	17.8416	1.43537	0.530607	2.07381	0.0686904	1.49681	0.721764	428.261	6.20194	432.213	7.2999	453.351	31.8799	428.261	6.20194	94.4657
LEARY SY-B-Spot 82	529.741	79359.7	1.66153	17.7119	0.992314	0.537021	1.56239	0.0690152	1.20681	0.77241	430.22	5.02248	436.458	5.54289	469.485	21.988	430.22	5.02248	91.6366
LEARY SY-B-Spot 181	269.012	18410.1	2.35171	18.1618	1.03983	0.524269	1.75605	0.0690878	1.41509	0.805835	430.657	5.89508	427.999	6.13289	413.69	23.2435	430.657	5.89508	104.101
LEARY SY-B-Spot 145	770.789	34872.5	10.7681	17.917	0.867671	0.537982	1.94675	0.0699393	1.74269	0.895181	435.79	7.34347	437.093	6.91454	443.944	19.3077	435.79	7.34347	98.1631
LEARY SY-B-Spot 300	454.275	471888	3.85408	17.8383	0.850544	0.540493	1.44166	0.0699571	1.16402	0.807421	435.897	4.90621	438.75	5.13602	453.769	18.8807	435.897	4.90621	96.0615
LEARY SY-B-Spot 237	456.404	25241.4	8.37527	17.8192	1.1996	0.541274	1.79579	0.0699832	1.33634	0.744154	436.054	5.63447	439.264	6.40367	456.123	26.6397	436.054	5.63447	95.6001
LEARY SY-B-Spot 169	576.475	79858.2	2.24062	17.8116	0.992348	0.54206	1.41313	0.0700547	1.00608	0.711947	436.485	4.24601	439.782	5.04385	457.089	22.0149	436.485	4.24601	95.4925
LEARY SY-B-Spot 146	445.737	304164	2.32754	17.6662	0.890023	0.571961	1.64498	0.0733159	1.38341	0.840988	456.102	6.09171	459.282	6.07744	475.224	19.6861	456.102	6.09171	95.9761
LEARY SY-B-Spot 273	374.108	15233.2	1.46844	17.5518	1.06602	0.580465	1.53873	0.073924	1.10964	0.721137	459.753	4.92392	464.76	5.73838	489.563	23.5179	459.753	4.92392	93.911
LEARY SY-B-Spot 260	502.805	59346.2	1.94042	17.4817	1.20501	0.593471	1.67844	0.0752783	1.16837	0.696106	467.878	5.27288	473.082	6.3474	498.382	26.5229	467.878	5.27288	93.8794
LEARY SY-B-Spot 188	349.496	18636.6	5.0887	17.3819	1.01169	0.626742	1.54428	0.0790451	1.16673	0.75552	490.42	5.50966	494.064	6.0413	511.006	22.2448	490.42	5.50966	95.9715
LEARY SY-B-Spot 263	424.803	16392.6	2.63754	17.2134	1.12001	0.641652	1.49704	0.0801407	0.993332	0.663532	496.962	4.75101	503.328	5.94136	532.39	24.5164	496.962	4.75101	93.3456
LEARY SY-B-Spot 178	850.167	154048	3.91591	16.9588	0.805573	0.739947	1.46483	0.0910506	1.22343	0.835203	561.748	6.58168	562.375	6.32541	564.892	17.5239	561.748	6.58168	99.4433
LEARY SY-B-Spot 89	638.163	69771.7	2.13159	16.8636	0.735207	0.750789	1.32196	0.0918665	1.09866	0.831084	566.566	5.95896	568.682	5.75624	577.145	15.9962	566.566	5.95896	98.1671
LEARY SY-B-Spot 119	323.654	24614.6	1.2211	16.371	1.03091	0.777783	1.7184	0.092389	1.37481	0.800056	569.65	7.49557	584.218	7.63381	641.271	22.1888	569.65	7.49557	88.8315
LEARY SY-B-Spot 44	546.686	22765.6	0.651828	16.7281	0.906334	0.773676	1.53168	0.0939057	1.23474	0.806139	578.595	6.83294	581.869	6.78404	594.652	19.635	578.595	6.83294	97.2997
LEARY SY-B-Spot 268	440.437	36138.8	1.21387	16.6962	0.903007	0.781243	1.40814	0.0946438	1.08048	0.76731	582.943	6.02219	586.192	6.27111	598.813	19.5557	582.943	6.02219	97.3498
LEARY SY-B-Spot 230	230.543	89996.2	1.40992	16.6639	0.973162	0.785869	1.47934	0.0950201	1.11419	0.753163	585.159	6.23261	588.826	6.61006	602.965	21.0476	585.159	6.23261	97.0469
LEARY SY-B-Spot 14	320.71	38770.3	1.38359	16.5742	1.01595	0.801387	1.52394	0.0963749	1.13588	0.745361	593.129	6.4366	597.611	6.88396	614.634	21.9421	593.129	6.4366	96.5012
LEARY SY-B-Spot 157	64.8232	5647.58	0.958299	16.7584	2.8369	0.798867	3.20329	0.0971391	1.48763	0.464408	597.621	8.49076	596.189	14.4454	590.725	61.5268	597.621	8.49076	101.167
LEARY SY-B-Spot 244	233.301	30393.3	1.69402	15.4708	1.40306	0.883264	1.87794	0.0991499	1.24824	0.664685	609.425	7.25859	642.744	8.94341	761.63	29.5613	609.425	7.25859	80.0159
LEARY SY-B-Spot 136	84.6281	10820.8	1.50182	16.4243	1.60926	0.837727	2.03499	0.0998336	1.24559	0.612084	613.434	7.28857	617.89	9.41948	634.272	34.6622	613.434	7.28857	96.7145
LEARY SY-B-Spot 15	454.472	54125.6	0.617221	16.143	0.865776	0.852671	1.58098	0.0998745	1.32285	0.836728	613.673	7.74358	626.114	7.38837	671.343	18.5172	613.673	7.74358	91.4097
LEARY SY-B-Spot 312	188.02	13366.1	0.754455	16.2688	1.41958	0.854514	1.85838	0.10087	1.19933	0.645362	619.507	7.0841	627.124	8.69491	654.713	30.4774	619.507	7.0841	94.6226
LEARY SY-B-Spot 60	193.78	32614.1	1.38831	16.016	1.0641	0.869803	1.8661	0.101079	1.53298	0.821487	620.73	9.07188	635.46	8.81457	688.199	22.7182	620.73	9.07188	90.1962
LEARY SY-B-Spot 28	63.4462	16565.1	0.738603	16.1946	1.7054	0.863577	2.20299	0.101475	1.39456	0.63303	623.047	8.28209	632.074	10.366	664.516	36.5518	623.047	8.28209	93.7595
LEARY SY-B-Spot 294	309.149	76635.5	1.98343	16.3518	1.04327	0.861369	1.59285	0.102198	1.20365	0.755656	627.279	7.19453	630.87	7.48463	643.781	22.4319	627.279	7.19453	97.4367
LEARY SY-B-Spot 2	180.095	62776.3	2.20483	16.0906	1.00475	0.876525	1.45256	0.102335	1.049	0.722173	628.077	6.27775	639.104	6.88939	678.262	21.4693	628.077	6.27775	92.601
LEARY SY-B-Spot 46	126.514	7078.56	1.47137	16.1005	1.49138	0.878788	1.92108	0.102663	1.21092	0.630335	629.994	7.26782	640.328	9.12415	676.979	31.8812	629.994	7.26782	93.0597
LEARY SY-B-Spot 96	169.341	10456.6	1.74804	16.5871	1.44803	0.857723	2.0121	0.10323	1.39706	0.694328	633.309	8.42699	628.879	9.43318	612.961	31.2975	633.309	8.42699	103.32
LEARY SY-B-Spot 24	130.743	6338.17	0.953802	15.9264	0.920643	0.958841	1.46284	0.110803	1.1368	0.777119	677.41	7.30999	682.696	7.27078	700.14	19.6049	677.41	7.30999	96.7535
LEARY SY-B-Spot 165	583.077	38572	97.8591	15.5501	0.920485	1.03216	1.53409	0.116458	1.22725	0.799986	710.143	8.25236	720.007	7.91188	750.845	19.4201	710.143	8.25236	94.5792
LEARY SY-B-Spot 87	54.9322	3892.48	2.08973	15.8531	1.73741	1.06057	2.22141	0.121994	1.38423	0.623131	742.031	9.70232	734.102	11.6099	709.965	36.9202	742.031	9.70232	104.517
LEARY SY-B-Spot 86	541.267	48332.7	2.07093	14.9721	0.87202	1.2208	1.44648	0.132622	1.15408	0.79785	802.806	8.71131	810.142	8.07398	830.371	18.1833	802.806	8.71131	96.6804
LEARY SY-B-Spot 107	463.009	65859.4	3.64794	14.1697	0.9152	1.5697	1.48468	0.161385	1.16905	0.787409	964.469	10.4722	958.306	9.20889	944.179	18.7461	944.179	18.7461	102.149
LEARY SY-B-Spot 59	420.934	38055.9	2.63214	14.1692	1.04156	1.49723	1.6853	0.153929	1.32492	0.786159	922.952	11.3933	929.261	10.2601	944.24	21.3349	944.24	21.3349	97.7456
LEARY SY-B-Spot 51	47.8873	5747.1	0.766674	13.833	1.53639	1.61157	2.21394	0.161753	1.59407	0.720014	966.513	14.3075	974.717	13.873	993.261	31.2156	993.261	31.2156	97.307
LEARY SY-B-Spot 291	40.0045	14047.9	2.53816	13.7919	1.30525	1.5692	1.83398	0.157032	1.28833	0.702479	940.263	11.2717	958.109	11.3742	999.287	26.5113	999.287	26.5113	94.0933
LEARY SY-B-Spot 278	189.513	44567.7	0.890688	13.7857	1.05378	1.55264	1.45252	0.155306	0.99967	0.688233	930.638	8.66296	951.545	8.97105	1000.2	21.4011	1000.2	21.4011	93.0455
LEARY SY-B-Spot 148	111.971	105908	0.944246	13.7303	1.20502	1.59604	1.8014	0.159005	1.33902	0.743322	951.243	11.8421	968.662	11.2458	1008.38	24.4354	1008.38	24.4354	94.3341
LEARY SY-B-Spot 40	327.54	66931.7	1.02296	13.7025	0.812466	1.62013	1.71616	0.161079	1.51166	0.880837	962.768	13.5191	978.043	10.7754	1012.48	16.4685	1012.48	16.4685	95.0897
LEARY SY-B-Spot 283	38.4934	3707.38	1.46654	13.6779	1.69387	1.73095	2.54174	0.171788	1.89505	0.745574	1021.96	17.9096	1020.11	16.3595	1016.11	34.3269	1016.11	34.3269	100.575
LEARY SY-B-Spot 163	259.653	37921.7	2.93733	13.6757	0.884597	1.73263	1.47606	0.171927	1.18163	0.800529	1022.72	11.1749	1020.73	9.50327	1016.45	17.9199	1016.45	17.9199	100.617
LEARY SY-B-Spot 128	164.251	53543.8	4.10641	13.6562	0.919684	1.60611	1.53518	0.159145	1.22921	0.800694	952.022	10.8792	972.593	9.60692	1019.34	18.6229	1019.34	18.6229	93.3961
LEARY SY-B-Spot 252	507.822	44243.4	0.564892	13.644	0.665996	1.80004	1.19885	0.178201	0.996841	0.831497	1057.14	9.7193	1045.47	7.82566	1021.15	13.4818	1021.15	13.4818	103.525
LEARY SY-B-Spot 275	196.745	25726.2	2.25579	13.5551	0.922637	1.70365	1.41903	0.167559	1.07815	0.759775	998.65	9.97439	1009.9	9.07955	1034.37	18.6592	1034.37	18.6592	96.5467
LEARY SY-B-Spot 105	259.616	713987	2.33466	13.5369	1.00353	1.70826	1.38386	0.167788	0.952888	0.688573	999.912	8.82586	1011.63	8.86333	1037.08	20.2859	1037.08	20.2859	96.4159
LEARY SY-B-Spot 1	106.097	65630.3	1.24126	13.5325	0.849354	1.65952	1.57165	0.162948	1.32237	0.841393	973.138	11.9443	993.194	9.95814	1037.74	17.1708	1037.74	17.1708	93.7748
LEARY SY-B-Spot 267	1302.3	31157.7	2.29836	13.4966	0.834704	1.62805	1.32886	0.159434	1.03399	0.778105	953.63	9.16582	981.108	8.359	1043.14	16.8601	1043.14	16.8601	91.4196
LEARY SY-B-Spot 293	43.1977	9586.31	0.980773	13.4865	1.97267	1.67958	2.61004	0.164357	1.70906	0.654802	980.947	15.5518	1000.82	16.6131	1044.64	39.8055	1044.64	39.8055	93.9027
LEARY SY-B-Spot 123	204.076	33383.8	1.45723	13.4599	0.946737	1.84456	1.68912	0.180146	1.39886	0.828161	1067.77	13.7652	1061.49	11.1221	1048.62	19.1057	1048.62	19.1057	101.826
LEARY SY-B-Spot 69	626.521	64005.1	1.68217	13.4593	0.717582	1.81182	1.07807	0.17694	0.804559	0.746294	1050.24	7.79736	1049.73	7.05361	1048.71	14.4854	1048.71	14.4854	100.146
LEARY SY-B-Spot 262	89.546	24868.6	0.924287	13.4502	1.22796	1.85012	1.71935	0.180558	1.20344	0.69994	1070.02	11.8651	1063.47	11.3331	1050.07	24.7688	1050.07	24.7688	101.9
LEARY SY-B-Spot 52	109.315	7600.73	1.53694	13.4396	1.01344	1.85703	1.91556	0.18109	1.62552	0.848587	1072.92	16.0666	1065.93	12.6431	1051.67	20.4399	1051.67	20.4399	102.021
LEARY SY-B-Spot 184	195.808	29306.7	1.17849	13.4294	0.907685	1.72076	1.40834	0.167674	1.07681	0.764597	999.281	9.96784	1016.31	9.04436	1053.19	18.306	1053.19	18.306	94.881
LEARY SY-B-Spot 7	207.138	31094.4	3.26125	13.4033	0.859323	1.7142	1.58319	0.166709	1.32968	0.839874	993.955	12.2479	1013.86	10.153	1057.12	17.321	1057.12	17.321	94.0248
LEARY SY-B-Spot 182	66.3358	33488.9	2.52723	13.3572	1.53533	1.68986	2.0072	0.163778	1.29292	0.644139	977.739	11.7294	1004.71	12.8046	1064.04	30.8856	1064.04	30.8856	91.889
LEARY SY-B-Spot 286	574.351	108186	1.34979	13.3445	0.820107	1.90945	1.41422	0.184883	1.15214	0.814686	1093.6	11.589	1084.39	9.42444	1065.97	16.4901	1065.97	16.4901	102.592
LEARY SY-B-Spot 172	326.68	41580	2.37178	13.3419	1.00037	1.85141	1.52026	0.179229	1.14475	0.752994	1062.76	11.216	1063.93	10.0232	1066.35	20.1018	1066.35	20.1018	99.6631
LEARY SY-B-Spot 112	164.75	61896	1.37447	13.3089	1.22842	1.6877	1.54427	0.162976	0.935821	0.605995	973.296	8.45405	1003.9	9.8465	1071.34	24.6795	1071.34	24.6795	90.8488
LEARY SY-B-Spot 104	244.477	35112.7	3.05642	13.2791	1.09133	1.92545	1.72711	0.185519	1.33862	0.775063	1097.05	13.5038	1089.96	11.5427	1075.82	21.8993	1075.82	21.8993	101.974
LEARY SY-B-Spot 167	84.3975	25872.3	2.68385	13.2642	1.13698	1.60107	1.77525	0.154092	1.36338	0.767991	923.862	11.7348	970.63	11.096	1078.09	22.8098	1078.09	22.8098	85.6946
LEARY SY-B-Spot 202	79.595	106201	1.23224	13.2531	1.23783	1.89253	1.81876	0.181991	1.33254	0.732665	1077.84	13.2262	1078.47	12.0835	1079.72	24.8267	1079.72	24.8267	99.8259
LEARY SY-B-Spot 243	325.243	46178.8	4.67787	13.2008	1.0042	1.94254	1.61638	0.186062	1.26659	0.783598	1100.01	12.8087	1095.88	10.8352	1087.67	20.1079	1087.67	20.1079	101.134
LEARY SY-B-Spot 154	80.8011	90369.2	1.50898	13.1061	0.904674	1.83469	1.39054	0.17447	1.05602	0.759428	1036.7	10.1127	1057.96	9.13866	1102.1	18.0795	1102.1	18.0795	94.0657
LEARY SY-B-Spot 83	87.1916	12916.8	0.835952	13.0739	1.02411	1.85297	1.60769	0.175776	1.23929	0.770855	1043.86	11.9434	1064.49	10.6028	1106.99	20.4565	1106.99	20.4565	94.2967
LEARY SY-B-Spot 314	163.736	32317.3	2.89691	13.011	1.14572	1.94453	1.7248	0.183574	1.28929	0.747503	1086.47	12.891	1096.56	11.5661	1116.66	22.8577	1116.66	22.8577	97.2963
LEARY SY-B-Spot 66	251.789	17454.2	1.41575	12.9402	1.13071	1.93901	1.92082	0.182058	1.55276	0.808381	1078.21	15.4167	1094.66	12.8682	1127.51	22.5234	1127.51	22.5234	95.6276
LEARY SY-B-Spot 151	109.655	115564	1.57243	12.9401	1.15304	1.85813	1.74263	0.174463	1.30662	0.749799	1036.66	12.5122	1066.32	11.504	1127.52	22.9617	1127.52	22.9617	91.9415
LEARY SY-B-Spot 47	336.788	132912	3.14649	12.8906	0.889365	2.07463	1.44958	0.194044	1.14469	0.789671	1143.25	11.9919	1140.46	9.93196	1135.19	17.6816	1135.19	17.6816	100.71
LEARY SY-B-Spot 306	157.132	15586.8	11.5389	12.8513	1.09722	1.94961	1.46	0.181795	0.963168	0.659706	1076.77	9.55126	1098.31	9.79892	1141.24	21.807	1141.24	21.807	94.3512
LEARY SY-B-Spot 37	583.097	276481	2.75113	12.8468	0.85968	1.94067	1.40239	0.180898	1.10799	0.790074	1071.88	10.9415	1095.23	9.39758	1141.92	17.0922	1141.92	17.0922	93.8664
LEARY SY-B-Spot 25	274.754	78260.4	2.47906	12.8448	1.14247	2.0829	1.79619	0.194126	1.38602	0.771645	1143.69	14.5252	1143.19	12.3229	1142.23	22.6984	1142.23	22.6984	100.128
LEARY SY-B-Spot 27	294.313	38056.2	2.6537	12.8307	0.875648	2.0023	1.49451	0.186409	1.21111	0.810375	1101.89	12.2669	1116.29	10.1208	1144.43	17.3895	1144.43	17.3895	96.283
LEARY SY-B-Spot 270	81.9679	56891.5	4.38536	12.8257	1.25239	2.10119	1.60902	0.19554	1.01019	0.627827	1151.32	10.651	1149.2	11.07	1145.22	24.8883	1145.22	24.8883	100.532
LEARY SY-B-Spot 36	182.719	23381	3.01031	12.8147	0.83847	2.12431	1.56577	0.197521	1.32234	0.844534	1161.99	14.0602	1156.74	10.8103	1146.92	16.6596	1146.92	16.6596	101.314
LEARY SY-B-Spot 31	587.121	67462.8	4.69968	12.782	0.769522	1.73997	1.48742	0.161371	1.27289	0.855771	964.393	11.4015	1023.45	9.59116	1151.97	15.2766	1151.97	15.2766	83.7167
LEARY SY-B-Spot 231	44.6124	13778.4	2.34093	12.7817	1.29578	2.0895	1.98672	0.193784	1.506	0.758031	1141.84	15.7593	1145.36	13.6442	1152.01	25.7433	1152.01	25.7433	99.1171
LEARY SY-B-Spot 247	355.371	150934	2.93119	12.7667	0.79475	2.08574	1.40699	0.193209	1.16103	0.825188	1138.73	12.1192	1144.12	9.65684	1154.34	15.7829	1154.34	15.7829	98.648
LEARY SY-B-Spot 30	929.456	75674.5	272.478	12.7576	0.657909	2.11587	1.62766	0.195861	1.48877	0.914669	1153.04	15.7186	1153.99	11.2233	1155.75	13.0533	1155.75	13.0533	99.7658
LEARY SY-B-Spot 149	108.93	29283.1	3.24235	12.7252	0.886514	1.98602	1.62108	0.183373	1.3572	0.83722	1085.38	13.5574	1110.77	10.9482	1160.8	17.5775	1160.8	17.5775	93.5024
LEARY SY-B-Spot 261	510.463	130756	4.04477	12.696	0.900145	2.17491	1.34664	0.200354	1.00159	0.74377	1177.22	10.777	1173.05	9.3671	1165.35	17.837	1165.35	17.837	101.019
LEARY SY-B-Spot 277	189.129	75314.8	1.63625	12.6375	0.851746	2.11578	1.74316	0.194007	1.5209	0.872496	1143.05	15.9306	1153.96	12.0196	1174.54	16.8643	1174.54	16.8643	97.3191
LEARY SY-B-Spot 3	52.042	12111.5	2.83087	12.6328	1.07932	2.10486	1.75324	0.192936	1.38163	0.788048	1137.26	14.4048	1150.4	12.069	1175.26	21.3725	1175.26	21.3725	96.7662
LEARY SY-B-Spot 8	173.017	37210.2	3.10349	12.5915	0.999886	2.18185	1.57443	0.199338	1.21617	0.772449	1171.76	13.0305	1175.27	10.9627	1181.75	19.7641	1181.75	19.7641	99.1549
LEARY SY-B-Spot 297	268.455	464394	4.21985	12.5873	0.879756	2.16455	1.46699	0.197692	1.17392	0.800224	1162.91	12.4911	1169.73	10.1889	1182.4	17.4003	1182.4	17.4003	98.3518
LEARY SY-B-Spot 23	99.5522	28315	2.21529	12.5499	1.22427	2.22338	1.59251	0.202462	1.01845	0.639526	1188.53	11.0543	1188.43	11.154	1188.27	24.1949	1188.27	24.1949	100.022
LEARY SY-B-Spot 285	265.069	135809	21.6714	12.5486	0.756838	2.17524	1.33044	0.198057	1.0942	0.822433	1164.88	11.6608	1173.16	9.25483	1188.46	14.9271	1188.46	14.9271	98.0157
LEARY SY-B-Spot 134	158.223	14454.6	2.63269	12.5166	1.04403	2.13801	1.62094	0.19417	1.23994	0.764952	1143.93	12.9968	1161.18	11.2143	1193.49	20.5855	1193.49	20.5855	95.8469
LEARY SY-B-Spot 224	202.965	24379.1	2.05664	12.5132	0.799093	2.28518	1.34119	0.207481	1.07715	0.803126	1215.38	11.9314	1207.72	9.47315	1194.02	15.7588	1194.02	15.7588	101.789
LEARY SY-B-Spot 197	104.202	17571.5	2.83927	12.5107	1.04587	2.24247	1.51474	0.203562	1.09573	0.723373	1194.43	11.9467	1194.43	10.6374	1194.46	20.6338	1194.46	20.6338	99.9973
LEARY SY-B-Spot 302	96.7205	25359.7	2.25697	12.4788	1.02458	2.10986	1.72784	0.191035	1.39129	0.805215	1126.98	14.3855	1152.03	11.9033	1199.48	20.1808	1199.48	20.1808	93.9553
LEARY SY-B-Spot 76	50.3182	9936.65	1.46569	12.4119	1.26961	2.17793	1.85271	0.196141	1.34931	0.728291	1154.56	14.2633	1174.02	12.8932	1210.09	24.9922	1210.09	24.9922	95.411
LEARY SY-B-Spot 5	42.4524	74074.3	4.18585	12.3198	1.50395	2.13422	1.93252	0.190779	1.21356	0.627971	1125.59	12.5337	1159.95	13.3625	1224.7	29.5563	1224.7	29.5563	91.9074
LEARY SY-B-Spot 53	285.873	402500	4.63208	12.2974	0.822256	2.2942	1.40528	0.204707	1.13961	0.810948	1200.56	12.4832	1210.5	9.93776	1228.3	16.1524	1228.3	16.1524	97.7414
LEARY SY-B-Spot 190	88.7986	26617.6	1.4218	12.2866	1.01287	2.26638	1.48411	0.202046	1.08475	0.730907	1186.3	11.7538	1201.89	10.4563	1230.03	19.8776	1230.03	19.8776	96.4449
LEARY SY-B-Spot 71	304.457	567751	2.24545	12.2771	1.08713	2.32161	1.69348	0.20681	1.29847	0.766747	1211.8	14.3445	1218.92	12.0191	1231.55	21.3534	1231.55	21.3534	98.3964
LEARY SY-B-Spot 68	260.957	50209.5	4.21296	12.2642	0.830644	2.29602	1.72636	0.204316	1.51339	0.876636	1198.47	16.5513	1211.06	12.2115	1233.6	16.2966	1233.6	16.2966	97.1517
LEARY SY-B-Spot 225	296.877	221213	3.83439	12.2281	0.953651	2.4143	1.42641	0.214208	1.06075	0.743652	1251.2	12.0635	1246.86	10.2418	1239.38	18.6977	1239.38	18.6977	100.954
LEARY SY-B-Spot 279	98.442	9330.1	2.68006	12.0058	1.12097	2.51832	1.58872	0.219376	1.12582	0.708632	1278.58	13.0568	1277.33	11.547	1275.22	21.8439	1275.22	21.8439	100.263
LEARY SY-B-Spot 303	26.3057	12396.5	1.0154	11.9696	1.95886	1.99331	2.54007	0.173118	1.61703	0.636611	1029.27	15.3829	1113.25	17.1767	1281.11	38.1555	1281.11	38.1555	80.3419
LEARY SY-B-Spot 200	733.334	319491	3.52355	11.8546	0.798979	2.59622	1.31738	0.223313	1.04743	0.795089	1299.36	12.326	1299.57	9.65713	1299.9	15.5288	1299.9	15.5288	99.9581
LEARY SY-B-Spot 131	336.841	65383.9	2.89308	11.8435	0.649041	2.61611	1.20238	0.224814	1.01216	0.841797	1307.26	11.9763	1305.17	8.8328	1301.72	12.6103	1301.72	12.6103	100.425
LEARY SY-B-Spot 183	99.3225	22270.3	3.21083	11.8077	1.06703	2.50077	1.46821	0.214252	1.00851	0.686898	1251.43	11.4714	1272.26	10.6499	1307.61	20.7144	1307.61	20.7144	95.704
LEARY SY-B-Spot 164	543.895	61109.2	2.99428	11.7704	1.04379	2.49014	1.98064	0.212668	1.68328	0.849866	1243.02	19.0298	1269.17	14.3498	1313.74	20.2455	1313.74	20.2455	94.6167
LEARY SY-B-Spot 205	223.754	499557	1.07898	11.6639	1.0058	2.77381	1.85484	0.234751	1.55846	0.840211	1359.35	19.1004	1348.52	13.8439	1331.35	19.4611	1331.35	19.4611	102.103
LEARY SY-B-Spot 57	602.268	63713.4	3.26136	11.5544	0.98331	2.85488	1.5994	0.239344	1.26141	0.788682	1383.28	15.7039	1370.1	12.0277	1349.58	18.9778	1349.58	18.9778	102.498
LEARY SY-B-Spot 175	99.0364	22979.8	3.19395	11.3792	1.06718	2.79069	1.48005	0.230416	1.02551	0.692889	1336.68	12.38	1353.05	11.0641	1378.99	20.5126	1378.99	20.5126	96.9317
LEARY SY-B-Spot 58	184.652	29900.9	2.52239	11.3683	0.997753	2.94831	1.91724	0.243197	1.63716	0.853916	1403.29	20.6457	1394.41	14.5378	1380.84	19.1719	1380.84	19.1719	101.626
LEARY SY-B-Spot 109	31.66	13481.6	2.87746	11.3353	1.39566	3.03339	1.78148	0.249487	1.10715	0.621478	1435.83	14.2509	1416.06	13.6049	1386.43	26.7993	1386.43	26.7993	103.563
LEARY SY-B-Spot 170	182.948	599200	2.54196	11.2604	0.905418	2.85996	1.32969	0.23367	0.973807	0.732355	1353.7	11.8904	1371.43	10.004	1399.13	17.3542	1399.13	17.3542	96.753
LEARY SY-B-Spot 99	103.476	838486	2.64403	11.2449	0.970541	2.90275	1.93613	0.236839	1.67531	0.865286	1370.24	20.6802	1382.63	14.6229	1401.78	18.5958	1401.78	18.5958	97.7503
LEARY SY-B-Spot 288	94.6164	32053.2	3.62006	11.2274	0.996057	2.88725	1.505	0.235208	1.12822	0.749651	1361.74	13.8492	1378.59	11.3508	1404.76	19.077	1404.76	19.077	96.9371
LEARY SY-B-Spot 179	727.263	265445	4.4377	11.2267	0.699044	2.99057	1.33864	0.243609	1.14162	0.85282	1405.43	14.4161	1405.22	10.1865	1404.89	13.388	1404.89	13.388	100.039
LEARY SY-B-Spot 132	61.3003	16188	2.57429	11.1633	2.46121	2.56935	2.91059	0.208115	1.5537	0.533811	1218.77	17.2537	1291.96	21.2769	1415.73	47.0738	1415.73	47.0738	86.0874
LEARY SY-B-Spot 144	115.511	40793.7	3.65287	11.163	1.14263	3.0664	1.90812	0.248368	1.52817	0.800878	1430.05	19.5994	1424.34	14.6111	1415.78	21.8517	1415.78	21.8517	101.008
LEARY SY-B-Spot 193	87.0685	20576.5	2.29753	11.1144	0.985096	3.13918	1.48286	0.253157	1.10836	0.747446	1454.73	14.4339	1442.35	11.4196	1424.12	18.8175	1424.12	18.8175	102.15
LEARY SY-B-Spot 315	235.233	110761	2.74677	11.0929	0.734073	3.12787	1.31197	0.251756	1.08738	0.828816	1447.53	14.0981	1439.57	10.0946	1427.82	14.0152	1427.82	14.0152	101.38
LEARY SY-B-Spot 240	205.321	23588.6	2.32022	11.0442	0.807221	3.19919	1.52036	0.256368	1.28837	0.847409	1471.23	16.9475	1456.97	11.7617	1436.2	15.3944	1436.2	15.3944	102.439
LEARY SY-B-Spot 307	260.303	151523	1.41621	11.0147	0.905049	3.03959	1.24132	0.242926	0.849569	0.684406	1401.89	10.704	1417.62	9.48429	1441.31	17.2482	1441.31	17.2482	97.2651
LEARY SY-B-Spot 50	822.647	80977.1	2.87842	10.9827	0.746722	2.7215	1.69813	0.216873	1.52514	0.898129	1265.33	17.5222	1334.34	12.61	1446.85	14.2201	1446.85	14.2201	87.454
LEARY SY-B-Spot 162	192.86	51025.6	2.65215	10.9642	0.955118	3.02205	1.37904	0.240418	0.99474	0.721326	1388.87	12.4287	1413.2	10.5215	1450.05	18.1809	1450.05	18.1809	95.7805
LEARY SY-B-Spot 272	471.984	142338	1.14994	10.9589	0.779173	3.18048	1.61986	0.252898	1.42016	0.876714	1453.41	18.4793	1452.43	12.514	1450.99	14.8298	1450.99	14.8298	100.167
LEARY SY-B-Spot 226	126.055	1.12417e+06	2.61641	10.9142	0.927843	3.21888	1.696	0.254909	1.41969	0.837082	1463.74	18.5903	1461.71	13.1398	1458.75	17.6411	1458.75	17.6411	100.342
LEARY SY-B-Spot 116	730.268	64114.1	8.357	10.9037	0.995437	3.13352	1.54425	0.24791	1.18059	0.764511	1427.69	15.1192	1440.96	11.8872	1460.58	18.9216	1460.58	18.9216	97.748
LEARY SY-B-Spot 284	175.085	157267	2.60375	10.8878	0.919539	3.24832	1.54559	0.256617	1.2423	0.803769	1472.51	16.3542	1468.78	12.0002	1463.36	17.4723	1463.36	17.4723	100.625
LEARY SY-B-Spot 70	144.924	110246	0.783365	10.8601	1.04827	2.97273	2.12521	0.234248	1.84869	0.869884	1356.72	22.6181	1400.67	16.1486	1468.2	19.9056	1468.2	19.9056	92.4071
LEARY SY-B-Spot 152	278.774	53449	3.44216	10.8557	0.678389	3.15428	1.43426	0.248453	1.26368	0.881068	1430.49	16.2117	1446.05	11.0581	1468.97	12.8803	1468.97	12.8803	97.3809
LEARY SY-B-Spot 192	280.994	62218.7	2.5976	10.853	0.926915	3.20063	1.39207	0.252042	1.0386	0.746083	1449	13.4779	1457.31	10.7703	1469.43	17.5981	1469.43	17.5981	98.6094
LEARY SY-B-Spot 301	285.912	189863	2.05478	10.8415	0.617843	3.27243	1.2386	0.257422	1.0735	0.866704	1476.64	14.1673	1474.52	9.63318	1471.46	11.7268	1471.46	11.7268	100.352
LEARY SY-B-Spot 220	229.874	88957.1	1.7015	10.8413	0.785396	3.1953	1.37215	0.251351	1.12514	0.819986	1445.44	14.569	1456.02	10.612	1471.48	14.9071	1471.48	14.9071	98.2302
LEARY SY-B-Spot 229	239.692	34140.3	3.26062	10.8331	0.842651	3.30396	1.25371	0.259701	0.92829	0.740436	1488.31	12.337	1481.99	9.77251	1472.93	15.9907	1472.93	15.9907	101.045
LEARY SY-B-Spot 241	233.645	72921.9	3.58495	10.8242	0.781854	3.24116	1.36381	0.254556	1.11744	0.819355	1461.93	14.6163	1467.06	10.5832	1474.49	14.8339	1474.49	14.8339	99.1481
LEARY SY-B-Spot 158	230.333	75119.9	1.78536	10.821	0.835098	3.29074	1.49073	0.258375	1.23486	0.828361	1481.52	16.3447	1478.86	11.6094	1475.03	15.8429	1475.03	15.8429	100.44
LEARY SY-B-Spot 125	194.892	23403.5	0.85092	10.8053	0.904727	3.28401	1.42305	0.257471	1.09843	0.771882	1476.89	14.4984	1477.27	11.077	1477.8	17.1576	1477.8	17.1576	99.9387
LEARY SY-B-Spot 133	830.462	64725.1	2.81075	10.8046	0.796769	3.25933	1.31929	0.25552	1.05151	0.79703	1466.88	13.7954	1471.4	10.2511	1477.92	15.1099	1477.92	15.1099	99.2531
LEARY SY-B-Spot 289	140.523	13595.3	0.750415	10.7782	0.969162	3.27515	1.78796	0.256134	1.5025	0.840346	1470.03	19.7499	1475.17	13.9089	1482.55	18.3679	1482.55	18.3679	99.1556
LEARY SY-B-Spot 250	440.878	2.55859e+06	2.07564	10.7735	0.837797	3.31241	1.66032	0.258933	1.43344	0.863353	1484.38	19.0057	1483.98	12.95	1483.39	15.8763	1483.39	15.8763	100.067
LEARY SY-B-Spot 35	155.793	34850	2.97082	10.751	0.797677	3.25789	1.38373	0.254141	1.13068	0.81712	1459.8	14.7702	1471.06	10.7508	1487.34	15.1081	1487.34	15.1081	98.1483
LEARY SY-B-Spot 18	1039.82	215586	3.46847	10.7278	0.909269	3.31609	1.62426	0.258121	1.3459	0.828624	1480.22	17.8005	1484.85	12.672	1491.44	17.2123	1491.44	17.2123	99.248
LEARY SY-B-Spot 113	181.897	44612.5	3.08588	10.688	0.913955	3.21126	1.56948	0.249034	1.27592	0.812954	1433.49	16.3994	1459.88	12.1527	1498.47	17.2847	1498.47	17.2847	95.6639
LEARY SY-B-Spot 103	257.337	26958.1	1.85759	10.674	0.831346	3.38337	1.4695	0.262039	1.21174	0.824589	1500.26	16.2189	1500.55	11.5176	1500.94	15.7172	1500.94	15.7172	99.9551
LEARY SY-B-Spot 180	115.264	63094.4	1.70453	10.6344	0.833528	3.26833	1.36191	0.25219	1.07705	0.790837	1449.76	13.9834	1473.55	10.5892	1507.96	15.7421	1507.96	15.7421	96.1402
LEARY SY-B-Spot 221	1146.42	41311.3	9.60086	10.6237	0.768997	2.98488	1.71663	0.230085	1.53476	0.89405	1334.95	18.506	1403.77	13.057	1509.87	14.5196	1509.87	14.5196	88.4144
LEARY SY-B-Spot 97	56.9401	21586.1	5.15182	10.5987	1.08408	3.26766	1.50985	0.25129	1.0509	0.696033	1445.13	13.605	1473.39	11.7389	1514.32	20.4576	1514.32	20.4576	95.4306
LEARY SY-B-Spot 122	106.899	453622	1.71492	10.5834	0.904009	3.1577	1.64571	0.242485	1.37519	0.835618	1399.6	17.3012	1446.88	12.6918	1517.04	17.0529	1517.04	17.0529	92.2588
LEARY SY-B-Spot 127	359.506	79476.2	3.3166	10.5755	0.876697	3.23444	1.51465	0.248192	1.23514	0.815461	1429.14	15.8322	1465.45	11.748	1518.45	16.5345	1518.45	16.5345	94.1187
LEARY SY-B-Spot 110	93.0297	12517.6	2.5207	10.5667	1.05268	3.41155	1.56589	0.261565	1.15925	0.740318	1497.84	15.4941	1507.06	12.2962	1520.01	19.8499	1520.01	19.8499	98.5415
LEARY SY-B-Spot 98	296.841	46193.4	1.95351	10.5643	0.732391	3.55192	1.54354	0.272264	1.35872	0.880262	1552.28	18.744	1538.86	12.2303	1520.46	13.8089	1520.46	13.8089	102.093
LEARY SY-B-Spot 313	400.331	60576.1	4.41542	10.5598	0.803877	3.51884	1.31121	0.269614	1.03588	0.79002	1538.84	14.1807	1531.46	10.3679	1521.25	15.1553	1521.25	15.1553	101.156
LEARY SY-B-Spot 108	175.946	41942.7	4.55682	10.4967	0.926514	3.43483	1.57352	0.261604	1.27182	0.808267	1498.04	17.0007	1512.4	12.3752	1532.54	17.4416	1532.54	17.4416	97.7488
LEARY SY-B-Spot 207	360.041	295744	3.0049	10.4292	0.7211	3.51562	1.33978	0.266037	1.12917	0.842802	1520.65	15.2958	1530.73	10.5916	1544.67	13.5541	1544.67	13.5541	98.4451
LEARY SY-B-Spot 43	208.555	77891.8	1.00297	10.4108	0.893578	3.61304	1.87961	0.272925	1.65361	0.879766	1555.63	22.8557	1552.41	14.9491	1548	16.7888	1548	16.7888	100.493
LEARY SY-B-Spot 245	232.38	537164	1.59907	10.4068	0.905522	3.4522	1.63653	0.260675	1.36318	0.83297	1493.29	18.1706	1516.37	12.8854	1548.72	17.0116	1548.72	17.0116	96.4209
LEARY SY-B-Spot 196	208.193	161224	1.23467	10.2399	0.708417	3.60072	1.63096	0.267529	1.46907	0.900741	1528.25	19.9883	1549.69	12.9617	1579.03	13.2542	1579.03	13.2542	96.7839
LEARY SY-B-Spot 6	359.563	54051.6	1.83991	10.2352	0.690871	3.76174	1.5653	0.279366	1.40458	0.897327	1588.17	19.7718	1584.62	12.5566	1579.88	12.9244	1579.88	12.9244	100.524
LEARY SY-B-Spot 176	211.694	35820	1.46732	10.1692	0.913959	3.73103	1.52877	0.275298	1.22549	0.801616	1567.64	17.0537	1578.05	12.2424	1591.98	17.0716	1591.98	17.0716	98.471
LEARY SY-B-Spot 246	196.729	173350	2.15571	10.1679	0.788419	3.81267	1.47271	0.281285	1.2439	0.844629	1597.83	17.6037	1595.42	11.8471	1592.23	14.7275	1592.23	14.7275	100.352
LEARY SY-B-Spot 42	285.687	34271.6	2.4166	10.1445	0.715226	3.79027	1.5625	0.278991	1.38919	0.889083	1586.28	19.5345	1590.69	12.554	1596.52	13.3528	1596.52	13.3528	99.3585
LEARY SY-B-Spot 93	380.942	61977.5	1.00884	10.1394	0.757713	3.71317	1.38851	0.273177	1.16354	0.837979	1556.91	16.0937	1574.21	11.1078	1597.46	14.1443	1597.46	14.1443	97.4614
LEARY SY-B-Spot 282	673.969	343297	2.35455	10.1287	0.784789	3.95966	1.31375	0.291004	1.05359	0.80197	1646.54	15.3095	1625.97	10.6504	1599.43	14.6459	1599.43	14.6459	102.945
LEARY SY-B-Spot 189	331.024	97812.5	1.42384	10.0988	0.629274	3.6975	1.33051	0.270935	1.17229	0.881085	1545.55	16.11	1570.83	10.6342	1604.95	11.7352	1604.95	11.7352	96.2989
LEARY SY-B-Spot 211	375.087	408926	3.28034	10.0876	1.09853	3.79939	1.64958	0.278093	1.23059	0.746	1581.75	17.2607	1592.62	13.2604	1607.01	20.4796	1607.01	20.4796	98.4278
LEARY SY-B-Spot 139	357.418	40150.4	2.16604	10.0721	0.709158	3.5912	1.2069	0.26245	0.97658	0.809162	1502.37	13.0876	1547.59	9.5858	1609.88	13.2148	1609.88	13.2148	93.3214
LEARY SY-B-Spot 101	79.3279	16996.2	1.58617	10.045	1.20128	3.73544	1.62858	0.272257	1.09964	0.675216	1552.25	15.1697	1579	13.045	1614.9	22.3725	1614.9	22.3725	96.1202
LEARY SY-B-Spot 217	521.495	74263.4	0.727652	10.0448	0.833123	4.10455	1.71899	0.299155	1.50361	0.874704	1687.12	22.3198	1655.21	14.0359	1614.93	15.5151	1614.93	15.5151	104.47
LEARY SY-B-Spot 147	197.247	210336	1.04715	10.0371	0.783241	3.98874	1.53416	0.29049	1.31916	0.859857	1643.98	19.1422	1631.91	12.4557	1616.37	14.5833	1616.37	14.5833	101.708
LEARY SY-B-Spot 222	59.8286	9803.46	2.28156	10.0326	1.14426	4.03674	1.70041	0.293853	1.2578	0.739705	1660.76	18.4153	1641.63	13.8386	1617.21	21.3041	1617.21	21.3041	102.693
LEARY SY-B-Spot 135	176.268	57058	1.76959	10.0002	0.924821	3.81825	1.47316	0.27705	1.1467	0.778391	1576.49	16.0368	1596.6	11.8543	1623.23	17.2046	1623.23	17.2046	97.1206
LEARY SY-B-Spot 38	148.962	31595.5	1.43101	9.99947	0.963837	3.89014	1.38242	0.282248	0.991009	0.716866	1602.67	14.0623	1611.64	11.1669	1623.35	17.9303	1623.35	17.9303	98.726
LEARY SY-B-Spot 242	114.842	44962.9	1.28291	9.99354	1.19065	3.8789	1.70011	0.281265	1.21356	0.713815	1597.73	17.1735	1609.3	13.7252	1624.46	22.1471	1624.46	22.1471	98.3547
LEARY SY-B-Spot 67	261.317	74608.9	1.67338	9.9852	0.88038	4.0319	1.41003	0.292115	1.10141	0.781129	1652.09	16.0518	1640.65	11.4724	1626.01	16.3719	1626.01	16.3719	101.604
LEARY SY-B-Spot 130	397.143	156996	1.41012	9.96865	0.709484	4.05219	1.53527	0.293099	1.3615	0.886815	1656.99	19.8938	1644.74	12.5039	1629.09	13.1882	1629.09	13.1882	101.713
LEARY SY-B-Spot 214	183.236	165085	1.12188	9.9617	0.731341	4.16703	1.29699	0.301196	1.07113	0.825859	1697.23	15.9833	1667.56	10.621	1630.39	13.5923	1630.39	13.5923	104.1
LEARY SY-B-Spot 126	140.849	36745.6	0.935047	9.95806	1.01583	4.16361	1.4221	0.300838	0.99522	0.699823	1695.46	14.837	1666.89	11.6438	1631.07	18.8788	1631.07	18.8788	103.948
LEARY SY-B-Spot 228	185.15	38124.4	1.39699	9.9524	0.783477	3.85543	1.64907	0.278412	1.45107	0.87993	1583.36	20.3716	1604.4	13.2965	1632.13	14.5581	1632.13	14.5581	97.0122
LEARY SY-B-Spot 73	105.158	19076.6	1.71467	9.9502	1.12591	4.01045	1.85811	0.289543	1.47814	0.795507	1639.24	21.395	1636.32	15.1025	1632.54	20.921	1632.54	20.921	100.411
LEARY SY-B-Spot 171	257.202	77562.5	1.46383	9.9497	0.949603	3.94738	1.47556	0.284974	1.12939	0.765399	1616.37	16.1463	1623.45	11.9547	1632.63	17.6443	1632.63	17.6443	99.0037
LEARY SY-B-Spot 248	114	25428.3	1.42855	9.94504	0.938444	3.88017	1.38137	0.279992	1.01366	0.733807	1591.32	14.2938	1609.57	11.1525	1633.5	17.435	1633.5	17.435	97.4178
LEARY SY-B-Spot 32	278.467	918577	1.81135	9.94145	1.01058	3.99752	1.68268	0.288355	1.34542	0.799568	1633.31	19.4119	1633.69	13.6676	1634.17	18.7737	1634.17	18.7737	99.947
LEARY SY-B-Spot 17	148.234	29048.7	2.42462	9.93623	0.841061	4.21485	1.64156	0.303873	1.40973	0.858775	1710.49	21.1794	1676.92	13.4727	1635.15	15.6222	1635.15	15.6222	104.607
LEARY SY-B-Spot 309	197.493	76561.3	2.2837	9.92002	0.597604	3.94714	1.0204	0.284108	0.827089	0.810558	1612.02	11.7965	1623.4	8.26678	1638.18	11.0969	1638.18	11.0969	98.403
LEARY SY-B-Spot 39	117.638	11859.9	1.26624	9.91636	1.27111	3.73846	2.30368	0.268988	1.92126	0.833995	1535.66	26.2532	1579.64	18.4568	1638.86	23.6002	1638.86	23.6002	93.7028
LEARY SY-B-Spot 310	184.652	35584.2	2.20187	9.89743	0.776212	4.21754	1.4045	0.302879	1.17052	0.833407	1705.57	17.5414	1677.44	11.5283	1642.41	14.4057	1642.41	14.4057	103.845
LEARY SY-B-Spot 253	161.553	335542	1.69664	9.88762	0.889068	4.2437	1.58459	0.304456	1.31168	0.827769	1713.37	19.7352	1682.52	13.022	1644.25	16.4964	1644.25	16.4964	104.203
LEARY SY-B-Spot 218	60.385	19024.2	2.07635	9.8696	1.12034	3.96838	1.67372	0.284185	1.24345	0.742926	1612.4	17.7387	1627.76	13.5749	1647.64	20.7772	1647.64	20.7772	97.8617
LEARY SY-B-Spot 121	243.769	49880.9	2.2797	9.8581	0.884398	4.02165	1.55338	0.287664	1.27704	0.822103	1629.84	18.391	1638.58	12.6324	1649.8	16.3964	1649.8	16.3964	98.7905
LEARY SY-B-Spot 120	203.619	27655.5	0.996349	9.85713	0.895043	3.8576	1.37914	0.275902	1.04925	0.7608	1570.69	14.6263	1604.86	11.1212	1649.98	16.5934	1649.98	16.5934	95.1945
LEARY SY-B-Spot 4	253.147	90088.4	1.67623	9.82408	0.768108	3.30186	1.47054	0.235363	1.25399	0.852743	1362.55	15.4013	1481.49	11.4611	1656.21	14.2284	1656.21	14.2284	82.2691
LEARY SY-B-Spot 271	202.7	95456.9	1.73727	9.82024	0.85849	4.03514	1.71828	0.28752	1.48845	0.866245	1629.12	21.4274	1641.31	13.983	1656.93	15.9014	1656.93	15.9014	98.3219
LEARY SY-B-Spot 155	185.34	67987.6	1.21153	9.80565	0.822921	3.94329	1.4161	0.280558	1.15245	0.813821	1594.17	16.2767	1622.61	11.4706	1659.68	15.2372	1659.68	15.2372	96.0527
LEARY SY-B-Spot 78	188.653	28514.5	1.3617	9.75267	1.17183	4.11724	1.89464	0.291351	1.48878	0.785784	1648.28	21.6532	1657.73	15.4796	1669.71	21.671	1669.71	21.671	98.7167
LEARY SY-B-Spot 213	114.018	61681.2	0.899197	9.74538	0.949875	4.1041	1.67386	0.290205	1.37824	0.82339	1642.55	19.9843	1655.12	13.667	1671.09	17.5626	1671.09	17.5626	98.2923
LEARY SY-B-Spot 20	90.5218	130596	1.31913	9.7386	1.07328	4.01087	1.87306	0.283415	1.53506	0.819549	1608.54	21.8525	1636.4	15.2243	1672.37	19.8414	1672.37	19.8414	96.183
LEARY SY-B-Spot 233	247.445	66688.3	3.34977	9.7302	0.818373	3.33434	1.76687	0.235407	1.56592	0.886266	1362.77	19.2352	1489.13	13.8022	1673.97	15.1254	1673.97	15.1254	81.4097
LEARY SY-B-Spot 9	275.539	54799.6	2.15235	9.71961	0.900758	4.31953	1.52405	0.30463	1.22938	0.806651	1714.23	18.5051	1697.1	12.5665	1675.98	16.644	1675.98	16.644	102.282
LEARY SY-B-Spot 143	291.823	210787	4.65695	9.6942	1.08905	4.05069	1.78126	0.284924	1.40956	0.791326	1616.11	20.1491	1644.44	14.5066	1680.82	20.1115	1680.82	20.1115	96.1502
LEARY SY-B-Spot 22	196.116	177832	1.18987	9.68078	0.921815	3.96853	1.57628	0.278758	1.27863	0.811174	1585.11	17.9682	1627.79	12.7846	1683.38	17.0189	1683.38	17.0189	94.1622
LEARY SY-B-Spot 195	1269.35	17239.6	1.55542	9.67447	0.811352	3.34885	1.58871	0.235078	1.36591	0.859759	1361.06	16.7594	1492.52	12.4227	1684.58	14.9771	1684.58	14.9771	80.7949
LEARY SY-B-Spot 311	327.083	52134	1.51419	9.64364	0.930378	4.39435	1.62544	0.307485	1.33284	0.819986	1728.32	20.2062	1711.28	13.4457	1690.47	17.1598	1690.47	17.1598	102.239
LEARY SY-B-Spot 45	422.748	719071	3.19843	9.61579	0.951911	4.51893	1.49922	0.315289	1.15825	0.772565	1766.68	17.8981	1734.46	12.4652	1695.8	17.5451	1695.8	17.5451	104.18
LEARY SY-B-Spot 265	195.79	91511.1	1.72384	9.61086	1.08801	4.25867	1.86777	0.296978	1.51816	0.812818	1676.31	22.4093	1685.41	15.3598	1696.75	20.0516	1696.75	20.0516	98.7952
LEARY SY-B-Spot 239	272.841	286995	4.52363	9.56822	0.832372	4.4585	1.52667	0.309533	1.27979	0.838291	1738.41	19.5007	1723.28	12.6623	1704.94	15.3239	1704.94	15.3239	101.963
LEARY SY-B-Spot 304	271.176	96854.5	3.50888	9.56108	0.909592	4.19585	1.24097	0.291082	0.844191	0.680265	1646.93	12.2693	1673.21	10.1758	1706.31	16.7428	1706.31	16.7428	96.5201
LEARY SY-B-Spot 88	173.711	48495.2	1.75956	9.54918	0.727614	4.37357	1.92095	0.303033	1.77782	0.925488	1706.33	26.6528	1707.36	15.8765	1708.6	13.3888	1708.6	13.3888	99.867
LEARY SY-B-Spot 54	130.4	19969.3	1.06698	9.5339	1.28935	4.14219	1.96622	0.286542	1.48445	0.754977	1624.23	21.3132	1662.67	16.0834	1711.55	23.7185	1711.55	23.7185	94.8981
LEARY SY-B-Spot 137	196.652	57496.1	1.78682	9.53226	1.05021	4.1459	2.12848	0.286749	1.85135	0.869797	1625.26	26.5961	1663.4	17.4141	1711.87	19.3181	1711.87	19.3181	94.9411
LEARY SY-B-Spot 142	161.689	65648.9	1.87842	9.50892	0.919192	4.26928	1.31218	0.29456	0.936436	0.713647	1664.28	13.7356	1687.46	10.7955	1716.37	16.8981	1716.37	16.8981	96.9646
LEARY SY-B-Spot 296	898.247	176306	2.39891	9.50513	0.854183	4.63551	1.83079	0.319701	1.61931	0.884487	1788.27	25.2882	1755.69	15.292	1717.11	15.7014	1717.11	15.7014	104.144
LEARY SY-B-Spot 227	209.722	73308.5	1.4016	9.47767	0.65199	4.46719	1.30992	0.307202	1.13613	0.86733	1726.92	17.2119	1724.9	10.8683	1722.42	11.9779	1722.42	11.9779	100.261
LEARY SY-B-Spot 129	206.526	54316.2	2.09516	9.46611	0.832379	4.5271	1.4502	0.310942	1.18752	0.818871	1745.34	18.1575	1735.96	12.0614	1724.67	15.2877	1724.67	15.2877	101.199
LEARY SY-B-Spot 174	288.497	286638	2.51687	9.45773	0.75973	4.33582	1.35003	0.29754	1.11598	0.826628	1679.1	16.4968	1700.2	11.1394	1726.29	13.9505	1726.29	13.9505	97.2663
LEARY SY-B-Spot 168	761.764	462552	3.63898	9.4363	0.665348	4.56515	1.35626	0.312568	1.18185	0.8714	1753.33	18.1428	1742.93	11.2972	1730.46	12.2092	1730.46	12.2092	101.322
LEARY SY-B-Spot 236	235.654	259814	2.0252	9.38114	0.978905	4.72851	1.51264	0.321861	1.15319	0.762364	1798.81	18.1009	1772.31	12.6786	1741.21	17.94	1741.21	17.94	103.308
LEARY SY-B-Spot 264	152.291	3.42857e+06	1.83459	9.36498	0.721112	4.58496	1.33895	0.311551	1.12818	0.842585	1748.34	17.276	1746.54	11.1616	1744.36	13.2097	1744.36	13.2097	100.228
LEARY SY-B-Spot 308	442.122	58213.7	1.82062	9.27084	0.748688	4.71371	1.58303	0.317081	1.39479	0.881091	1775.46	21.6465	1769.68	13.2614	1762.85	13.6852	1762.85	13.6852	100.715
LEARY SY-B-Spot 287	299.099	138981	2.32003	9.26664	1.0022	4.7365	1.66761	0.318469	1.33286	0.799265	1782.25	20.754	1773.72	13.9818	1763.68	18.3156	1763.68	18.3156	101.053
LEARY SY-B-Spot 206	339.847	88022.4	1.84564	9.23747	0.844144	4.83361	1.42638	0.323976	1.14977	0.806079	1809.12	18.137	1790.77	12.0011	1769.44	15.4157	1769.44	15.4157	102.242
LEARY SY-B-Spot 160	435.998	1.09828e+07	4.10426	9.22857	1.01474	4.75275	1.63503	0.318249	1.28204	0.784109	1781.17	19.9522	1776.59	13.7168	1771.2	18.5275	1771.2	18.5275	100.563
LEARY SY-B-Spot 223	404.621	61130.2	3.17749	9.21765	1.0816	4.68364	1.87613	0.31325	1.53297	0.817092	1756.68	23.5721	1764.32	15.6995	1773.36	19.7433	1773.36	19.7433	99.0593
LEARY SY-B-Spot 198	147.374	48292.5	1.74479	9.14433	0.810418	4.64305	1.53586	0.308065	1.30464	0.849454	1731.18	19.8073	1757.04	12.832	1787.92	14.7659	1787.92	14.7659	96.8262
LEARY SY-B-Spot 90	162.548	66038	2.6609	9.09621	0.776912	4.78845	1.48799	0.316041	1.26907	0.852872	1770.36	19.6462	1782.87	12.4993	1797.53	14.1405	1797.53	14.1405	98.4885
LEARY SY-B-Spot 75	117.426	62523.2	1.70659	9.02882	1.12099	4.40558	1.68798	0.288617	1.262	0.74764	1634.61	18.2212	1713.39	13.9696	1811.06	20.3677	1811.06	20.3677	90.2575
LEARY SY-B-Spot 276	235.672	1.0189e+06	11.9755	9.01563	0.959333	5.16949	1.49709	0.338167	1.14933	0.76771	1877.84	18.7234	1847.61	12.7379	1813.71	17.4244	1813.71	17.4244	103.536
LEARY SY-B-Spot 212	333.913	71191.5	1.92949	8.91953	0.764826	4.87566	1.84748	0.315547	1.68173	0.910284	1767.94	26.0036	1798.06	15.5675	1833.15	13.86	1833.15	13.86	96.4428
LEARY SY-B-Spot 114	190.297	183831	1.34135	8.89024	0.897868	4.80528	1.6924	0.30997	1.43459	0.847666	1740.56	21.8829	1785.82	14.2251	1839.11	16.2573	1839.11	16.2573	94.6414
LEARY SY-B-Spot 201	316.86	183795	1.61332	8.77723	0.885808	5.3683	1.48556	0.341887	1.19257	0.802776	1895.74	19.5871	1879.81	12.7161	1862.24	15.9941	1862.24	15.9941	101.799
LEARY SY-B-Spot 106	85.221	34752.6	0.801095	8.65009	0.942194	5.29999	1.33345	0.332647	0.943583	0.707627	1851.2	15.1833	1868.86	11.3909	1888.55	16.9586	1888.55	16.9586	98.0223
LEARY SY-B-Spot 34	151.258	75085.6	1.23166	8.54525	0.81888	5.58912	1.40242	0.346542	1.13852	0.811824	1918.06	18.8885	1914.42	12.0794	1910.47	14.7022	1910.47	14.7022	100.398
LEARY SY-B-Spot 65	340.538	273135	5.77684	8.54156	0.75254	5.70957	1.26719	0.353858	1.01954	0.804566	1952.99	17.1783	1932.82	10.9496	1911.24	13.5098	1911.24	13.5098	102.185
LEARY SY-B-Spot 177	267.632	1.11694e+06	8.88838	8.50201	0.962244	5.45587	1.5979	0.336569	1.27569	0.798352	1870.14	20.7084	1893.68	13.7125	1919.57	17.2556	1919.57	17.2556	97.4251
LEARY SY-B-Spot 266	194.814	43418.7	2.58062	8.46304	0.96569	5.5864	1.92313	0.343041	1.66309	0.864783	1901.28	27.3837	1914	16.5638	1927.8	17.3005	1927.8	17.3005	98.6246
LEARY SY-B-Spot 292	259.136	213184	44.7744	8.44571	0.779268	5.57486	1.5997	0.341632	1.39706	0.873327	1894.51	22.9329	1912.22	13.7734	1931.47	13.9542	1931.47	13.9542	98.0866
LEARY SY-B-Spot 269	215.465	61104	1.48072	8.43018	0.694513	5.59304	1.56854	0.342115	1.4064	0.896632	1896.84	23.1107	1915.03	13.5118	1934.77	12.4314	1934.77	12.4314	98.0395
LEARY SY-B-Spot 238	481.058	206581	1.24515	8.30166	0.895242	6.00685	1.33145	0.361826	0.985541	0.740203	1990.82	16.88	1976.84	11.5903	1962.22	15.9733	1962.22	15.9733	101.457
LEARY SY-B-Spot 74	289.625	60264.3	5.72556	8.25293	1.00278	5.74244	1.59274	0.343869	1.23743	0.776923	1905.25	20.4116	1937.78	13.7746	1972.72	17.8704	1972.72	17.8704	96.5801
LEARY SY-B-Spot 77	440.955	93074.7	3.3048	8.0525	0.750287	5.99271	1.34775	0.35014	1.11959	0.830716	1935.27	18.7173	1974.79	11.7283	2016.42	13.3045	2016.42	13.3045	95.9755
LEARY SY-B-Spot 159	216.286	9907.12	1.38527	8.01527	3.36576	5.29945	3.56396	0.308203	1.17195	0.328835	1731.86	17.7988	1868.77	30.4524	2024.63	59.6374	2024.63	59.6374	85.5392
LEARY SY-B-Spot 62	177.111	53678.2	1.90961	7.97726	1.07522	6.2945	1.43617	0.364337	0.952099	0.662942	2002.7	16.3901	2017.69	12.5842	2033.05	19.0281	2033.05	19.0281	98.507
LEARY SY-B-Spot 85	207.329	47379.8	2.31554	7.9395	1.03444	6.52546	1.49029	0.375917	1.0728	0.719862	2057.18	18.8947	2049.34	13.1221	2041.44	18.2886	2041.44	18.2886	100.771
LEARY SY-B-Spot 204	26.9186	3174.83	2.04969	7.89497	0.923192	6.44734	1.91953	0.369333	1.68295	0.87675	2026.26	29.2618	2038.74	16.875	2051.38	16.303	2051.38	16.303	98.7756
LEARY SY-B-Spot 256	38.9307	30556.3	1.27933	7.59477	1.25736	6.02754	2.63603	0.332156	2.31683	0.878908	1848.83	37.2395	1979.83	22.961	2119.57	22.0348	2119.57	22.0348	87.2264
LEARY SY-B-Spot 118	126.533	49298.9	1.84454	7.51166	1.02076	7.0395	1.65878	0.383677	1.30752	0.788241	2093.44	23.3722	2116.43	14.749	2138.83	17.8493	2138.83	17.8493	97.8774
LEARY SY-B-Spot 117	380.292	80051.8	2.14729	6.44497	0.638889	9.06707	1.20369	0.424009	1.02014	0.847512	2278.66	19.5813	2344.79	11.0084	2402.83	10.8622	2402.83	10.8622	94.8322
LEARY SY-B-Spot 102	116.163	19713.6	1.40796	6.20372	0.793732	10.5669	1.56286	0.47565	1.3463	0.861432	2508.29	27.9747	2485.81	14.498	2467.47	13.4037	2467.47	13.4037	101.655
LEARY SY-B-Spot 208	40.2895	27677.6	1.09555	6.14178	1.00599	9.9315	1.84971	0.442585	1.55223	0.839175	2362.2	30.6996	2428.44	17.0651	2484.4	16.9629	2484.4	16.9629	95.0814
LEARY SY-B-Spot 255	604.924	1.13208e+06	81.606	5.8012	1.14108	10.5	2.76597	0.441972	2.51962	0.910938	2359.46	49.7853	2479.92	25.6484	2580.13	19.0571	2580.13	19.0571	91.4475
LEARY SY-B-Spot 274	329.071	86466.5	3.89959	5.60037	0.782092	11.615	1.38421	0.471979	1.14209	0.825084	2492.23	23.607	2573.88	12.9416	2638.81	12.9868	2638.81	12.9868	94.4455
LEARY SY-B-Spot 251	50.452	49314.2	1.2368	5.54343	0.751603	13.2943	1.35888	0.534726	1.1321	0.833112	2761.34	25.4276	2700.78	12.8333	2655.76	12.4636	2655.76	12.4636	103.975
LEARY SY-B-Spot 234	178.298	7.84478e+07	2.21569	5.45362	0.795457	13.0271	1.36536	0.515489	1.10971	0.812759	2680.02	24.333	2681.62	12.876	2682.81	13.1537	2682.81	13.1537	99.8962
LEARY SY-B-Spot 156	157.803	121373	1.25505	5.3763	0.677289	13.9293	1.44684	0.543378	1.27853	0.883668	2797.57	29.0176	2744.91	13.7078	2706.39	11.1778	2706.39	11.1778	103.369
LEARY SY-B-Spot 79	131.839	64651.6	1.52681	5.3527	0.661381	13.3003	1.21875	0.516563	1.02368	0.839944	2684.59	22.4774	2701.21	11.5101	2713.65	10.9078	2713.65	10.9078	98.9289
LEARY SY-B-Spot 161	232.478	210693	1.36953	5.34467	0.818357	13.9766	1.5207	0.542011	1.28172	0.842852	2791.86	29.0426	2748.12	14.4109	2716.13	13.4936	2716.13	13.4936	102.788
LEARY SY-B-Spot 10	22.4628	10670.6	3.31194	5.28337	0.8143	14.2483	1.33558	0.546211	1.05863	0.792635	2809.4	24.1077	2766.38	12.6726	2735.12	13.3998	2735.12	13.3998	102.716
LEARY SY-B-Spot 84	345.382	104620	2.89544	5.24933	0.78865	12.7702	1.60997	0.486394	1.40358	0.871805	2555.06	29.6083	2662.85	15.1614	2745.76	12.965	2745.76	12.965	93.0546
LEARY SY-B-Spot 95	113.521	847564	3.35826	5.10027	0.754083	14.7206	1.54823	0.544762	1.35217	0.873368	2803.35	30.7397	2797.35	14.7215	2793.02	12.343	2793.02	12.343	100.37
LEARY SY-B-Spot 281	57.856	19909.6	1.33784	5.07373	0.896594	12.7211	1.59323	0.468318	1.31701	0.826626	2476.18	27.0789	2659.22	14.9995	2801.55	14.6685	2801.55	14.6685	88.386
LEARY SY-B-Spot 29	384.39	456789	0.918812	5.06157	0.785026	13.5514	1.35133	0.497687	1.09992	0.813955	2603.85	23.5622	2718.88	12.7789	2805.48	12.8385	2805.48	12.8385	92.8129
LEARY SY-B-Spot 138	144.18	71681	1.00221	5.04605	0.798014	15.0552	1.40788	0.551222	1.15988	0.823843	2830.26	26.5696	2818.74	13.4058	2810.5	13.0449	2810.5	13.0449	100.703
LEARY SY-B-Spot 63	115.358	33913.3	1.78895	5.01688	0.842051	15.2749	1.24735	0.556032	0.920237	0.737753	2850.21	21.1983	2832.54	11.8877	2819.97	13.7492	2819.97	13.7492	101.072
LEARY SY-B-Spot 81	516.952	205513	4.91533	3.50815	0.702269	24.8411	1.51804	0.632321	1.34583	0.886559	3158.76	33.6082	3301.99	14.8185	3390.13	10.9386	3390.13	10.9386	93.1752
1PS-4							Isotope ratios						Apparent ages (Ma)
Analysis	U	206Pb	U/Th	206Pb*	±	207Pb*	±	206Pb*	±	error	206Pb*	±	207Pb*	±	206Pb*	±	Best age	±	Conc
	(ppm)	204Pb		207Pb*	(%)	235U*	(%)	238U	(%)	corr.	238U*	(Ma)	235U	(Ma)	207Pb*	(Ma)	(Ma)	(Ma)	(%)
LEARY 1PS-4-Spot 81	690.523	15828.2	0.962352	15.3236	1.97667	0.508677	2.85721	0.0565577	2.0631	0.72207	354.657	7.11931	417.559	9.78207	781.752	41.542	354.657	7.11931	NA
LEARY 1PS-4-Spot 146	186.992	111456	1.28536	18.3625	1.14175	0.458452	1.69094	0.0610821	1.24727	0.737619	382.203	4.62853	383.181	5.39714	389.072	25.6312	382.203	4.62853	NA
LEARY 1PS-4-Spot 125	200.81	86540.7	318.993	17.5501	0.972834	0.513712	1.44424	0.0654165	1.06744	0.739099	408.482	4.22501	420.942	4.97678	489.787	21.4539	408.482	4.22501	83.4
LEARY 1PS-4-Spot 140	182.414	39794.8	0.971767	17.9476	1.07725	0.515542	1.73684	0.0671364	1.36241	0.784416	418.88	5.5254	422.169	5.99917	440.148	23.9781	418.88	5.5254	95.1681
LEARY 1PS-4-Spot 188	233.291	106979	1.38167	17.9225	1.03045	0.524138	1.5587	0.0681604	1.16949	0.750299	425.063	4.81072	427.912	5.44274	443.264	22.9368	425.063	4.81072	95.8938
LEARY 1PS-4-Spot 157	453.841	605333	6.99752	17.9148	0.826044	0.535918	1.39035	0.0696624	1.11836	0.804373	434.121	4.69519	435.73	4.92594	444.217	18.3873	434.121	4.69519	97.7273
LEARY 1PS-4-Spot 130	279.924	76495.9	1.00885	17.1768	1.26431	0.560915	1.55235	0.069908	0.900725	0.580233	435.602	3.79395	452.122	5.66425	537.038	27.6602	435.602	3.79395	81.1118
LEARY 1PS-4-Spot 71	395.733	501692	2.24252	17.7895	0.874647	0.54422	1.50064	0.0702466	1.21939	0.81258	437.641	5.15944	441.203	5.37001	459.804	19.3952	437.641	5.15944	95.18
LEARY 1PS-4-Spot 45	345.786	3.55061e+06	1.83485	17.6952	0.994244	0.586572	1.37644	0.0753119	0.951878	0.69155	468.079	4.29763	468.676	5.16718	471.601	22.0031	468.079	4.29763	99.2532
LEARY 1PS-4-Spot 185	468.036	148191	2.33264	17.4097	0.916021	0.646817	1.75665	0.0817071	1.4989	0.853276	506.304	7.29865	506.518	7.00579	507.506	20.1674	506.304	7.29865	99.7633
LEARY 1PS-4-Spot 269	189.821	1.42325e+06	2.07896	16.6093	0.753372	0.741318	1.32729	0.0893394	1.09276	0.823302	551.629	5.77726	563.174	5.73754	610.072	16.2768	551.629	5.77726	90.4203
LEARY 1PS-4-Spot 105	175.409	114606	1.64073	16.5926	0.807432	0.810041	1.29123	0.0975233	1.00764	0.78037	599.878	5.7719	602.477	5.86758	612.249	17.4544	599.878	5.7719	97.9794
LEARY 1PS-4-Spot 291	323.903	265753	1.04501	16.4031	0.982767	0.849643	1.75651	0.101123	1.45585	0.828831	620.986	8.61883	624.453	8.19292	637.057	21.1673	620.986	8.61883	97.4772
LEARY 1PS-4-Spot 112	374.397	172995	1.07319	14.8068	0.774841	1.2718	1.50206	0.136637	1.28678	0.856678	825.616	9.97171	833.195	8.53839	853.473	16.1072	825.616	9.97171	96.736
LEARY 1PS-4-Spot 123	486.871	440969	2.80647	14.3656	0.812795	1.43111	1.78623	0.149171	1.5906	0.890475	896.317	13.31	902.014	10.6771	916.015	16.7222	916.015	16.7222	97.8495
LEARY 1PS-4-Spot 256	352.936	1.17761e+06	2.3716	14.2567	0.807917	1.41559	1.39542	0.146435	1.13775	0.815343	880.95	9.36828	895.512	8.30346	931.614	16.5618	931.614	16.5618	94.5617
LEARY 1PS-4-Spot 303	60.3702	41805.3	2.13061	14.1192	1.15936	1.47137	1.63434	0.150736	1.15193	0.704832	905.09	9.72721	918.69	9.88029	951.481	23.7312	951.481	23.7312	95.1243
LEARY 1PS-4-Spot 179	130.474	65979.9	1.16055	13.9383	0.778188	1.62032	1.26068	0.163869	0.991837	0.786747	978.244	9.00228	978.113	7.91571	977.799	15.8383	977.799	15.8383	100.046
LEARY 1PS-4-Spot 193	325.823	114801	5.20207	13.9172	0.6905	1.66478	1.27857	0.168111	1.07608	0.841628	1001.7	9.98331	995.199	8.11069	980.927	14.0832	980.927	14.0832	102.117
LEARY 1PS-4-Spot 116	74.9097	254229	1.18894	13.9001	1.02049	1.5621	1.42485	0.157548	0.994378	0.697883	943.138	8.72458	955.299	8.82108	983.405	20.759	983.405	20.759	95.9053
LEARY 1PS-4-Spot 223	66.0379	23506.2	1.34681	13.8997	0.963507	1.51464	1.35965	0.152757	0.959325	0.705567	916.398	8.19496	936.313	8.31572	983.484	19.5977	983.484	19.5977	93.1788
LEARY 1PS-4-Spot 143	217.397	455628	0.548438	13.8821	0.776743	1.61049	1.69719	0.162218	1.50902	0.889126	969.093	13.5777	974.297	10.632	986.07	15.8079	986.07	15.8079	98.2783
LEARY 1PS-4-Spot 6	52.2939	25076.9	1.52134	13.6872	0.915434	1.67866	1.37999	0.166712	1.03264	0.748297	993.968	9.51195	1000.47	8.78134	1014.74	18.5501	1014.74	18.5501	97.9529
LEARY 1PS-4-Spot 52	160.531	165159	3.01686	13.6702	0.833022	1.74175	1.55967	0.172762	1.31858	0.845421	1027.31	12.5217	1024.11	10.0608	1017.25	16.8735	1017.25	16.8735	100.989
LEARY 1PS-4-Spot 174	178.554	100192	1.83629	13.6634	0.694071	1.76997	1.39814	0.175475	1.2137	0.86808	1042.2	11.6796	1034.51	9.07157	1018.26	14.0562	1018.26	14.0562	102.351
LEARY 1PS-4-Spot 117	690.905	1.24474e+06	3.62081	13.6285	0.953531	1.76428	1.94544	0.174463	1.69573	0.871645	1036.65	16.2383	1032.42	12.6083	1023.45	19.3144	1023.45	19.3144	101.29
LEARY 1PS-4-Spot 272	107.316	57834.5	2.77495	13.6238	0.866131	1.769	1.38485	0.174869	1.08057	0.780277	1038.88	10.368	1034.15	8.98356	1024.15	17.5246	1024.15	17.5246	101.439
LEARY 1PS-4-Spot 120	111.543	30451	0.527064	13.6118	1.46993	1.60373	1.90832	0.158392	1.21696	0.637715	947.836	10.7269	971.666	11.9354	1025.93	29.7551	1025.93	29.7551	92.388
LEARY 1PS-4-Spot 44	733.04	330926	3.81354	13.6112	0.75529	1.73959	1.40666	0.171803	1.18669	0.843622	1022.04	11.2158	1023.31	9.06968	1026.02	15.2778	1026.02	15.2778	99.6122
LEARY 1PS-4-Spot 293	213.463	103571	1.70424	13.5758	0.747673	1.75921	1.21586	0.173289	0.9588	0.788579	1030.21	9.12879	1030.56	7.87145	1031.28	15.1308	1031.28	15.1308	99.8959
LEARY 1PS-4-Spot 124	197.255	1.84732e+06	2.05677	13.5639	0.800281	1.74712	1.54152	0.171947	1.31751	0.854682	1022.83	12.4612	1026.1	9.95491	1033.06	16.1902	1033.06	16.1902	99.0098
LEARY 1PS-4-Spot 29	339.002	101880	14.9259	13.5535	0.724361	1.77954	1.30785	0.175003	1.08893	0.832612	1039.62	10.455	1038.01	8.50222	1034.6	14.6525	1034.6	14.6525	100.485
LEARY 1PS-4-Spot 251	288.534	543187	4.65013	13.5514	0.704312	1.7095	1.45059	0.168091	1.26813	0.874217	1001.58	11.7638	1012.1	9.29322	1034.91	14.2471	1034.91	14.2471	96.7799
LEARY 1PS-4-Spot 49	56.5342	86882.5	1.78582	13.5366	1.06178	1.75736	1.55884	0.172607	1.14132	0.732158	1026.46	10.83	1029.88	10.0882	1037.13	21.461	1037.13	21.461	98.9713
LEARY 1PS-4-Spot 287	13.4597	25151.4	1.20825	13.5134	1.46462	1.65702	1.88143	0.162473	1.18096	0.627691	970.507	10.6403	992.239	11.9144	1040.58	29.5817	1040.58	29.5817	93.266
LEARY 1PS-4-Spot 134	46.8688	66620.3	0.861309	13.4936	0.835264	1.78388	1.60194	0.174656	1.36695	0.853308	1037.71	13.1022	1039.6	10.4233	1043.58	16.87	1043.58	16.87	99.4374
LEARY 1PS-4-Spot 220	141.071	180308	4.51964	13.4886	0.914073	1.84668	1.51744	0.180737	1.21123	0.79821	1071	11.952	1062.25	9.99557	1044.34	18.4584	1044.34	18.4584	102.553
LEARY 1PS-4-Spot 74	431.693	392532	2.66423	13.4783	0.817299	1.81969	1.53252	0.177959	1.29639	0.845923	1055.81	12.6254	1052.57	10.0426	1045.88	16.5023	1045.88	16.5023	100.95
LEARY 1PS-4-Spot 56	1219.35	841936	6.82779	13.4671	0.691152	1.76527	1.45303	0.172494	1.27813	0.879628	1025.84	12.1215	1032.79	9.4187	1047.55	13.955	1047.55	13.955	97.9272
LEARY 1PS-4-Spot 9	134.083	265584	2.08275	13.4493	0.710354	1.83093	1.16655	0.178673	0.92533	0.793219	1059.72	9.04233	1056.61	7.66098	1050.22	14.3355	1050.22	14.3355	100.905
LEARY 1PS-4-Spot 203	633.411	2.08507e+06	2.78237	13.4403	0.562813	1.66874	1.36442	0.162737	1.24293	0.91096	971.97	11.2142	996.707	8.66303	1051.56	11.3605	1051.56	11.3605	92.4315
LEARY 1PS-4-Spot 264	217.619	93407.2	4.39834	13.4261	0.936594	1.82153	1.46011	0.177449	1.12015	0.767163	1053.02	10.8824	1053.23	9.57152	1053.69	18.8872	1053.69	18.8872	99.9364
LEARY 1PS-4-Spot 50	47.7566	24204.7	1.45896	13.4216	0.918789	1.90122	1.38175	0.18515	1.03202	0.746893	1095.05	10.3934	1081.51	9.1944	1054.37	18.5255	1054.37	18.5255	103.859
LEARY 1PS-4-Spot 68	106.958	99768.2	5.30155	13.4159	0.723804	1.75749	1.37118	0.17108	1.16458	0.849325	1018.06	10.9673	1029.92	8.87389	1055.22	14.597	1055.22	14.597	96.478
LEARY 1PS-4-Spot 93	93.3133	163838	3.98427	13.3386	0.847477	1.78001	1.36486	0.172274	1.06987	0.783868	1024.63	10.1354	1038.18	8.87369	1066.85	17.0189	1066.85	17.0189	96.0428
LEARY 1PS-4-Spot 167	57.5232	13757.5	1.20639	13.3302	0.753511	1.8805	1.41151	0.181886	1.19356	0.84559	1077.27	11.841	1074.24	9.35692	1068.11	15.1312	1068.11	15.1312	100.857
LEARY 1PS-4-Spot 35	26.9125	29697.6	1.92014	13.3146	0.959237	1.8	1.51113	0.173895	1.16764	0.772691	1033.54	11.1502	1045.46	9.86414	1070.47	19.2557	1070.47	19.2557	96.5498
LEARY 1PS-4-Spot 107	255.725	135690	2.30783	13.2613	0.77178	1.90655	1.36366	0.183451	1.12424	0.824431	1085.8	11.2344	1083.38	9.08275	1078.52	15.4761	1078.52	15.4761	100.675
LEARY 1PS-4-Spot 259	87.6519	42244.5	4.58264	13.2532	0.893691	1.88471	1.34157	0.181239	1.00056	0.745814	1073.74	9.89636	1075.72	8.90012	1079.72	17.9293	1079.72	17.9293	99.4462
LEARY 1PS-4-Spot 268	72.0548	56997.9	1.99476	13.214	0.853607	1.80817	1.37496	0.173365	1.0779	0.783952	1030.63	10.2666	1048.42	8.98977	1085.7	17.1134	1085.7	17.1134	94.9277
LEARY 1PS-4-Spot 161	789.756	1.58928e+06	18.7585	13.2089	0.850114	1.87089	1.51036	0.179309	1.2484	0.826556	1063.2	12.2362	1070.85	9.99441	1086.45	17.031	1086.45	17.031	97.8602
LEARY 1PS-4-Spot 23	227.853	209429	2.44924	13.1932	0.936211	1.8793	1.54979	0.179901	1.23505	0.796915	1066.43	12.1392	1073.82	10.2713	1088.82	18.7419	1088.82	18.7419	97.9443
LEARY 1PS-4-Spot 236	398.328	119066	1.73216	13.1312	0.687418	1.95475	1.36129	0.186244	1.17497	0.863133	1101	11.892	1100.08	9.14455	1098.27	13.7446	1098.27	13.7446	100.248
LEARY 1PS-4-Spot 87	358.264	441775	2.29572	13.125	0.79109	1.90754	1.22055	0.181661	0.929473	0.76152	1076.04	9.21139	1083.73	8.13098	1099.19	15.8395	1099.19	15.8395	97.8948
LEARY 1PS-4-Spot 301	196.87	207293	1.51827	13.0589	0.878901	1.94422	1.33505	0.184222	1.00493	0.752731	1090	10.0778	1096.45	8.95187	1109.28	17.5418	1109.28	17.5418	98.2618
LEARY 1PS-4-Spot 254	49.8767	18359.6	3.16091	13.0576	1.02289	1.95791	1.58943	0.1855	1.21655	0.765399	1096.95	12.2713	1101.17	10.683	1109.49	20.4529	1109.49	20.4529	98.8699
LEARY 1PS-4-Spot 315	10.5105	21706.9	1.72684	13.0513	1.43152	1.89284	1.95731	0.179248	1.33485	0.681983	1062.87	13.0798	1078.58	13.0048	1110.45	28.5953	1110.45	28.5953	95.7148
LEARY 1PS-4-Spot 34	431.668	186396	3.32925	12.9987	0.654576	2.07774	1.25804	0.195965	1.07433	0.853974	1153.61	11.348	1141.49	8.6237	1118.55	13.059	1118.55	13.059	103.134
LEARY 1PS-4-Spot 273	242.169	168428	1.52478	12.9963	0.84928	2.06192	1.41435	0.194437	1.13098	0.799644	1145.37	11.8683	1136.26	9.67115	1118.92	16.9575	1118.92	16.9575	102.364
LEARY 1PS-4-Spot 40	340.809	110314	3.21132	12.963	0.830603	2.04344	1.29779	0.1922	0.997173	0.768363	1133.28	10.3632	1130.11	8.84794	1124.02	16.5697	1124.02	16.5697	100.824
LEARY 1PS-4-Spot 70	74.0689	302754	2.26812	12.9571	1.00912	1.96044	1.62338	0.184309	1.27163	0.783322	1090.47	12.7574	1102.03	10.916	1124.91	20.1048	1124.91	20.1048	96.9391
LEARY 1PS-4-Spot 257	82.3273	42935.5	2.35875	12.9446	0.862891	1.97166	1.49461	0.185186	1.22036	0.816508	1095.24	12.2922	1105.88	10.0695	1126.84	17.2088	1126.84	17.2088	97.196
LEARY 1PS-4-Spot 175	98.4635	69663	1.45117	12.9362	0.773119	1.95802	1.47973	0.183785	1.2617	0.852656	1087.62	12.6274	1101.2	9.94586	1128.16	15.4207	1128.16	15.4207	96.407
LEARY 1PS-4-Spot 219	66.4209	42381.9	1.6409	12.9071	0.900626	1.88163	1.51779	0.176218	1.2217	0.804922	1046.28	11.7991	1074.64	10.0636	1132.6	17.9117	1132.6	17.9117	92.3786
LEARY 1PS-4-Spot 25	367.324	218213	1.31004	12.8986	0.799769	2.03234	1.26194	0.190207	0.976141	0.773527	1122.5	10.0562	1126.4	8.58807	1133.95	15.9007	1133.95	15.9007	98.9899
LEARY 1PS-4-Spot 186	225.15	752602	1.96236	12.8786	0.597441	2.00789	1.8071	0.187628	1.70548	0.943768	1108.51	17.3693	1118.18	12.2493	1137.01	11.9043	1137.01	11.9043	97.4934
LEARY 1PS-4-Spot 142	204.206	67248.3	4.29267	12.8738	0.722951	2.07938	1.26073	0.194236	1.03285	0.819248	1144.28	10.8291	1142.03	8.64435	1137.78	14.3789	1137.78	14.3789	100.571
LEARY 1PS-4-Spot 284	38.2937	76843.7	3.19865	12.8311	1.2833	1.94158	1.74223	0.180763	1.17835	0.676346	1071.14	11.6289	1095.55	11.677	1144.35	25.5055	1144.35	25.5055	93.6025
LEARY 1PS-4-Spot 243	211.471	594561	3.22764	12.8293	0.659606	2.09219	1.44405	0.194756	1.2846	0.889582	1147.09	13.4989	1146.25	9.9211	1144.64	13.1086	1144.64	13.1086	100.214
LEARY 1PS-4-Spot 152	24.8933	33903.5	1.66462	12.7577	1.2504	2.11497	1.83909	0.195777	1.3486	0.733301	1152.6	14.2336	1153.7	12.6796	1155.75	24.8287	1155.75	24.8287	99.7272
LEARY 1PS-4-Spot 310	27.4235	98521.8	6.51194	12.7155	1.10497	2.01236	1.77438	0.185664	1.38834	0.782433	1097.84	14.0145	1119.69	12.0364	1162.31	21.9027	1162.31	21.9027	94.4533
LEARY 1PS-4-Spot 16	297.632	7.75621e+07	1.77325	12.7148	0.756167	2.14891	1.29316	0.198251	1.04903	0.811217	1165.92	11.1886	1164.7	8.96086	1162.42	14.9963	1162.42	14.9963	100.301
LEARY 1PS-4-Spot 209	277.844	338110	2.52949	12.6211	0.742715	2.25861	1.61472	0.206836	1.43377	0.887938	1211.94	15.8408	1199.47	11.3646	1177.1	14.7087	1177.1	14.7087	102.96
LEARY 1PS-4-Spot 108	14.2585	9120.78	1.1335	12.5855	1.47948	2.20153	1.84599	0.201039	1.104	0.598052	1180.9	11.9127	1181.53	12.8899	1182.69	29.2408	1182.69	29.2408	99.8485
LEARY 1PS-4-Spot 178	328.614	173742	3.86126	12.5721	0.892717	2.1675	1.3244	0.197722	0.978308	0.738681	1163.07	10.411	1170.68	9.20243	1184.79	17.6388	1184.79	17.6388	98.1673
LEARY 1PS-4-Spot 252	123.722	477533	2.83163	12.5624	0.954819	2.15483	1.54432	0.196414	1.21377	0.785959	1156.03	12.8454	1166.61	10.7108	1186.32	18.8795	1186.32	18.8795	97.4467
LEARY 1PS-4-Spot 110	42.0084	38785.5	1.56555	12.5435	0.915883	2.14222	1.62957	0.194971	1.34783	0.82711	1148.25	14.1765	1162.54	11.281	1189.26	18.0663	1189.26	18.0663	96.5516
LEARY 1PS-4-Spot 267	191.167	123635	2.71554	12.4996	0.835989	2.25869	1.43025	0.204852	1.16049	0.811389	1201.33	12.7194	1199.5	10.0663	1196.17	16.489	1196.17	16.489	100.432
LEARY 1PS-4-Spot 258	151.656	2.20491e+06	3.6918	12.4737	0.947342	2.1256	1.42886	0.192381	1.06966	0.748613	1134.26	11.1253	1157.16	9.86688	1200.27	18.657	1200.27	18.657	94.5008
LEARY 1PS-4-Spot 282	143.328	104404	1.12759	12.399	1.07683	2.20372	1.41823	0.198258	0.922937	0.650766	1165.96	9.844	1182.22	9.90586	1212.09	21.1921	1212.09	21.1921	96.194
LEARY 1PS-4-Spot 241	146.378	284782	1.18675	12.3861	0.948465	2.18623	1.45897	0.196479	1.10861	0.759857	1156.38	11.7357	1176.66	10.1651	1214.16	18.6598	1214.16	18.6598	95.2416
LEARY 1PS-4-Spot 215	194.568	108084	2.96114	12.3851	0.840293	2.18874	1.5966	0.196689	1.35759	0.850299	1157.51	14.3842	1177.46	11.1281	1214.32	16.5315	1214.32	16.5315	95.3216
LEARY 1PS-4-Spot 311	55.531	253545	2.62988	12.3032	0.899312	2.26542	1.4095	0.202234	1.08532	0.770006	1187.31	11.7691	1201.59	9.92929	1227.38	17.6534	1227.38	17.6534	96.7355
LEARY 1PS-4-Spot 59	280.572	209935	2.56642	12.2796	0.881603	2.30128	1.46593	0.205041	1.17121	0.798953	1202.34	12.8468	1212.68	10.3764	1231.14	17.3034	1231.14	17.3034	97.6607
LEARY 1PS-4-Spot 37	189.281	196178	2.2406	12.269	0.777982	2.42784	1.47013	0.216132	1.2474	0.848501	1261.4	14.291	1250.88	10.573	1232.84	15.2605	1232.84	15.2605	102.317
LEARY 1PS-4-Spot 94	97.0226	95277.1	3.44905	12.222	0.875284	2.37918	1.4745	0.210988	1.18661	0.804751	1234.08	13.3274	1236.36	10.5416	1240.33	17.1746	1240.33	17.1746	99.4959
LEARY 1PS-4-Spot 244	97.4271	246884	2.07861	12.2126	1.131	2.24689	1.5509	0.199104	1.0612	0.684247	1170.5	11.359	1195.82	10.898	1241.84	22.1798	1241.84	22.1798	94.2558
LEARY 1PS-4-Spot 190	665.106	409431	3.41308	12.1631	0.787426	2.4093	1.78007	0.212629	1.59644	0.896839	1242.81	18.0454	1245.38	12.7737	1249.79	15.413	1249.79	15.413	99.4414
LEARY 1PS-4-Spot 182	78.168	40132.1	1.7341	12.0815	0.801272	2.36943	1.56994	0.207707	1.35007	0.859947	1216.59	14.968	1233.43	11.2103	1262.96	15.6435	1262.96	15.6435	96.3288
LEARY 1PS-4-Spot 10	56.0765	90248	0.743718	12.0803	0.942151	2.46166	1.351	0.215771	0.968278	0.71671	1259.49	11.078	1260.85	9.75536	1263.15	18.3974	1263.15	18.3974	99.7102
LEARY 1PS-4-Spot 42	443.054	271393	3.27746	12.0785	1.00982	2.52778	1.79794	0.221534	1.48756	0.82737	1289.97	17.3912	1280.06	13.0818	1263.45	19.7094	1263.45	19.7094	102.1
LEARY 1PS-4-Spot 289	61.4403	172815	1.8209	12.0621	0.839291	2.34432	1.48794	0.205176	1.22864	0.825732	1203.06	13.484	1225.83	10.5911	1266.12	16.3883	1266.12	16.3883	95.0198
LEARY 1PS-4-Spot 48	218.603	142714	2.74885	12.014	0.962679	2.47398	1.46394	0.215661	1.1029	0.753374	1258.91	12.6129	1264.46	10.5862	1273.89	18.7607	1273.89	18.7607	98.8241
LEARY 1PS-4-Spot 230	275.148	139703	3.73536	11.9898	0.729912	2.5039	1.40227	0.217829	1.19732	0.853848	1270.39	13.8058	1273.17	10.1752	1277.83	14.2287	1277.83	14.2287	99.4183
LEARY 1PS-4-Spot 41	252.423	440141	4.25295	11.9606	1.02204	2.44039	1.42087	0.211788	0.987066	0.694693	1238.34	11.1209	1254.59	10.2341	1282.57	19.9115	1282.57	19.9115	96.551
LEARY 1PS-4-Spot 101	441.935	388996	3.04355	11.9349	0.83501	2.5196	1.64398	0.218192	1.41613	0.861403	1272.32	16.351	1277.7	11.9504	1286.76	16.2483	1286.76	16.2483	98.8773
LEARY 1PS-4-Spot 176	182.269	150634	1.37796	11.9141	0.759105	2.39788	1.44025	0.207288	1.22396	0.849826	1214.35	13.5473	1241.97	10.3206	1290.17	14.7722	1290.17	14.7722	94.1235
LEARY 1PS-4-Spot 280	63.0764	104297	1.61912	11.8595	0.833364	2.6292	1.01931	0.226244	0.586939	0.57582	1314.78	6.98091	1308.84	7.49819	1299.1	16.1979	1299.1	16.1979	101.208
LEARY 1PS-4-Spot 312	174.051	406146	2.53207	11.7704	0.637377	2.54344	1.86766	0.217221	1.75554	0.939965	1267.17	20.1958	1284.56	13.6129	1313.74	12.3627	1313.74	12.3627	96.4557
LEARY 1PS-4-Spot 149	291.107	1.92076e+06	2.3315	11.7581	0.916936	2.6791	1.77775	0.228567	1.52303	0.856718	1326.98	18.2659	1322.71	13.1453	1315.77	17.7799	1315.77	17.7799	100.852
LEARY 1PS-4-Spot 281	310.383	1.16878e+06	2.2364	11.7443	0.842336	2.62602	1.58901	0.223775	1.34737	0.847934	1301.79	15.8824	1307.95	11.6854	1318.04	16.3276	1318.04	16.3276	98.767
LEARY 1PS-4-Spot 129	63.374	90090.8	1.40962	11.7235	0.950259	2.61464	1.58342	0.222411	1.26658	0.799902	1294.6	14.8556	1304.76	11.6303	1321.48	18.4121	1321.48	18.4121	97.9662
LEARY 1PS-4-Spot 262	168.569	250464	2.75679	11.7194	0.6324	2.65284	1.2478	0.225582	1.07567	0.862056	1311.3	12.7632	1315.43	9.20165	1322.15	12.2513	1322.15	12.2513	99.1794
LEARY 1PS-4-Spot 265	398.969	255077	2.6805	11.7167	0.752437	2.6694	1.46032	0.226938	1.25155	0.857036	1318.43	14.9228	1320.03	10.7873	1322.6	14.5754	1322.6	14.5754	99.6848
LEARY 1PS-4-Spot 200	100.241	235010	2.22271	11.6979	1.02636	2.62194	1.43995	0.222545	1.00997	0.70139	1295.31	11.8516	1306.81	10.5846	1325.72	19.8752	1325.72	19.8752	97.7063
LEARY 1PS-4-Spot 218	81.446	82035.6	1.56683	11.6197	0.857877	2.67902	1.34782	0.225869	1.03955	0.771283	1312.81	12.3474	1322.68	9.96597	1338.69	16.5817	1338.69	16.5817	98.0665
LEARY 1PS-4-Spot 224	75.9122	77682.2	2.7377	11.5544	0.845634	2.67302	1.56255	0.224097	1.31395	0.8409	1303.49	15.5066	1321.03	11.5468	1349.58	16.321	1349.58	16.321	96.5845
LEARY 1PS-4-Spot 67	121.859	261460	2.65175	11.448	0.896024	2.87079	1.3255	0.238461	0.976781	0.736913	1378.69	12.1241	1374.28	9.98221	1367.41	17.25	1367.41	17.25	100.825
LEARY 1PS-4-Spot 276	194.817	90732.5	2.91257	11.4203	0.735953	2.88671	1.26754	0.239204	1.032	0.814177	1382.56	12.8418	1378.45	9.55927	1372.06	14.1596	1372.06	14.1596	100.765
LEARY 1PS-4-Spot 65	86.5135	245701	1.13532	11.304	0.751693	2.92897	1.29162	0.240235	1.05035	0.813205	1387.92	13.1155	1389.43	9.77718	1391.73	14.4222	1391.73	14.4222	99.7263
LEARY 1PS-4-Spot 75	362.54	357101	1.54273	11.2241	0.880531	2.97956	1.32872	0.242656	0.995062	0.74889	1400.49	12.5259	1402.42	10.1017	1405.33	16.863	1405.33	16.863	99.6557
LEARY 1PS-4-Spot 261	125.042	499870	2.69134	11.1994	0.816356	2.69073	1.37645	0.218651	1.10823	0.805137	1274.74	12.818	1325.91	10.1897	1409.55	15.6249	1409.55	15.6249	90.4359
LEARY 1PS-4-Spot 27	77.6018	404347	0.827471	11.0561	0.672749	3.08147	1.36864	0.2472	1.19188	0.870852	1424.02	15.2288	1428.09	10.4924	1434.15	12.8334	1434.15	12.8334	99.294
LEARY 1PS-4-Spot 127	387.769	2.21301e+06	0.44483	11.0518	0.856788	3.05619	1.31783	0.245077	1.00129	0.759803	1413.04	12.7053	1421.78	10.0824	1434.89	16.3426	1434.89	16.3426	98.4773
LEARY 1PS-4-Spot 141	104.61	164061	2.89012	11.0515	0.761091	3.10939	1.42744	0.249336	1.20762	0.845999	1435.05	15.5365	1435.02	10.9674	1434.95	14.5171	1434.95	14.5171	100.007
LEARY 1PS-4-Spot 168	171.088	100376	8.20252	10.939	0.601491	3.1258	1.12357	0.2481	0.949007	0.844637	1428.67	12.1609	1439.06	8.64356	1454.44	11.4426	1454.44	11.4426	98.2282
LEARY 1PS-4-Spot 304	243.344	212097	2.41879	10.85	0.879549	3.21397	1.67343	0.253022	1.42365	0.850735	1454.04	18.532	1460.53	12.9602	1469.96	16.6976	1469.96	16.6976	98.9168
LEARY 1PS-4-Spot 171	21.7035	6780.95	5.10415	10.7903	1.28266	3.29309	1.68844	0.257824	1.09801	0.650308	1478.7	14.5087	1479.42	13.1515	1480.44	24.3167	1480.44	24.3167	99.8829
LEARY 1PS-4-Spot 21	158.443	284576	2.45704	10.7813	0.756698	3.20351	1.38612	0.250604	1.16135	0.837843	1441.59	15.002	1458.01	10.7266	1482	14.3421	1482	14.3421	97.2729
LEARY 1PS-4-Spot 300	123.567	144358	2.86307	10.769	0.9006	3.30357	1.53526	0.258136	1.24336	0.809869	1480.3	16.4451	1481.9	11.967	1484.17	17.0647	1484.17	17.0647	99.7394
LEARY 1PS-4-Spot 102	100.637	54588.7	1.34445	10.7674	0.704194	3.27018	1.39773	0.255488	1.20738	0.863813	1466.72	15.8387	1473.99	10.8691	1484.45	13.3426	1484.45	13.3426	98.8054
LEARY 1PS-4-Spot 170	169.995	604145	1.47897	10.75	0.926077	3.25036	1.3087	0.253529	0.924698	0.70658	1456.65	12.0562	1469.26	10.1622	1487.52	17.5396	1487.52	17.5396	97.9246
LEARY 1PS-4-Spot 248	93.8318	164772	2.18648	10.729	0.824884	3.33068	1.48337	0.259286	1.23286	0.831123	1486.19	16.364	1488.27	11.5844	1491.22	15.6153	1491.22	15.6153	99.6625
LEARY 1PS-4-Spot 8	307.365	96420.2	4.49638	10.7064	0.815308	3.36528	1.37532	0.261429	1.1076	0.805341	1497.15	14.7977	1496.35	10.7661	1495.21	15.4258	1495.21	15.4258	100.13
LEARY 1PS-4-Spot 57	163.015	253903	1.78785	10.7047	0.72295	3.37829	1.23229	0.262396	0.997937	0.809824	1502.09	13.3716	1499.37	9.6549	1495.52	13.6777	1495.52	13.6777	100.439
LEARY 1PS-4-Spot 86	146.56	53510.5	1.2563	10.6928	0.845562	3.34649	1.41647	0.259638	1.1364	0.802277	1487.99	15.0998	1491.97	11.074	1497.62	15.993	1497.62	15.993	99.3567
LEARY 1PS-4-Spot 148	182.454	498316	2.32213	10.6916	0.835154	3.40134	1.44304	0.263865	1.17681	0.815508	1509.59	15.8382	1504.71	11.3238	1497.82	15.7957	1497.82	15.7957	100.785
LEARY 1PS-4-Spot 294	246.213	302652	3.4096	10.6789	0.605109	3.37035	1.14948	0.26115	0.97732	0.850226	1495.72	13.046	1497.53	9.00125	1500.08	11.4412	1500.08	11.4412	99.7095
LEARY 1PS-4-Spot 38	65.1021	145278	1.97349	10.645	0.674985	3.37331	1.26143	0.260548	1.06564	0.844791	1492.64	14.199	1498.22	9.87986	1506.09	12.7522	1506.09	12.7522	99.1069
LEARY 1PS-4-Spot 253	246.793	405263	2.8599	10.6377	0.809484	3.40859	1.25608	0.263094	0.960455	0.764644	1505.65	12.8965	1506.38	9.86134	1507.38	15.2892	1507.38	15.2892	99.8854
LEARY 1PS-4-Spot 162	465.52	6.89213e+06	2.75058	10.6347	0.709134	3.41226	1.42055	0.263303	1.2309	0.86649	1506.72	16.5382	1507.22	11.1554	1507.91	13.3926	1507.91	13.3926	99.9209
LEARY 1PS-4-Spot 235	58.9305	115864	5.31343	10.6318	1.04324	3.40705	1.42917	0.26283	0.976826	0.68349	1504.3	13.1059	1506.02	11.2192	1508.42	19.7022	1508.42	19.7022	99.7268
LEARY 1PS-4-Spot 88	204.587	702983	1.62174	10.614	0.876319	3.38356	1.40832	0.260578	1.10246	0.782823	1492.8	14.691	1500.59	11.0381	1511.6	16.5424	1511.6	16.5424	98.7561
LEARY 1PS-4-Spot 100	47.9654	101142	2.98433	10.608	0.817939	3.37702	1.31996	0.259928	1.03599	0.784863	1489.48	13.7778	1499.08	10.341	1512.67	15.438	1512.67	15.438	98.4668
LEARY 1PS-4-Spot 83	121.629	227095	3.09342	10.6069	0.877024	3.45759	1.50844	0.266104	1.22728	0.81361	1520.99	16.6282	1517.6	11.8809	1512.85	16.553	1512.85	16.553	100.538
LEARY 1PS-4-Spot 158	103.694	1.15686e+06	1.65711	10.5808	0.744096	3.35738	1.49011	0.257755	1.29103	0.866398	1478.35	17.0556	1494.51	11.6585	1517.5	14.0351	1517.5	14.0351	97.4196
LEARY 1PS-4-Spot 210	21.0977	86677.1	1.19427	10.5676	1.08938	3.36738	1.63248	0.258201	1.21583	0.744776	1480.63	16.0842	1496.84	12.7812	1519.85	20.5424	1519.85	20.5424	97.4193
LEARY 1PS-4-Spot 275	115.787	255351	2.5289	10.5645	0.771215	3.44237	1.211	0.263873	0.933676	0.770995	1509.62	12.5662	1514.13	9.52862	1520.42	14.5411	1520.42	14.5411	99.2902
LEARY 1PS-4-Spot 89	86.6356	95806.3	6.67953	10.5247	0.788013	3.42821	1.48046	0.261796	1.25331	0.846571	1499.02	16.763	1510.88	11.6382	1527.53	14.8439	1527.53	14.8439	98.1337
LEARY 1PS-4-Spot 206	569.031	199294	2.85317	10.5027	0.690234	3.4386	1.42879	0.262042	1.25101	0.875572	1500.28	16.7447	1513.26	11.2397	1531.46	12.995	1531.46	12.995	97.9639
LEARY 1PS-4-Spot 191	282.264	191957	4.65982	10.4768	0.749625	3.58996	1.32998	0.272901	1.09859	0.826023	1555.51	15.1833	1547.31	10.5626	1536.12	14.1062	1536.12	14.1062	101.263
LEARY 1PS-4-Spot 92	106.662	55754.5	1.7682	10.3864	0.965954	3.62113	1.44562	0.272896	1.07552	0.743987	1555.49	14.8643	1554.19	11.5027	1552.4	18.1382	1552.4	18.1382	100.199
LEARY 1PS-4-Spot 246	60.633	104996	3.27687	10.3834	0.825336	3.46227	1.50345	0.260849	1.25665	0.835847	1494.18	16.7595	1518.67	11.8452	1552.94	15.4965	1552.94	15.4965	96.2163
LEARY 1PS-4-Spot 121	147.191	121973	1.45391	10.3205	0.759812	3.53339	1.24049	0.264594	0.980556	0.790462	1513.3	13.2257	1534.72	9.81757	1564.35	14.2432	1564.35	14.2432	96.737
LEARY 1PS-4-Spot 217	177.492	393514	1.79142	10.3112	0.631855	3.50988	1.41283	0.262596	1.26366	0.894421	1503.11	16.9424	1529.44	11.1651	1566.04	11.8416	1566.04	11.8416	95.9817
LEARY 1PS-4-Spot 211	308.601	192359	5.30208	10.1902	0.84888	3.64224	1.34049	0.269301	1.03746	0.773938	1537.25	14.1893	1558.81	10.6795	1588.13	15.8638	1588.13	15.8638	96.7961
LEARY 1PS-4-Spot 164	129.067	158998	0.995726	10.1482	0.672396	3.31302	1.51541	0.24395	1.35807	0.896172	1407.2	17.1687	1484.12	11.8201	1595.84	12.5542	1595.84	12.5542	88.1792
LEARY 1PS-4-Spot 39	195.436	154941	2.53696	10.0831	0.65872	3.8707	1.49691	0.283187	1.34419	0.897972	1607.39	19.1233	1607.59	12.0794	1607.84	12.2797	1607.84	12.2797	99.9722
LEARY 1PS-4-Spot 279	78.1814	84785.6	1.24591	10.0474	0.740103	3.70609	1.55587	0.270183	1.36857	0.879616	1541.73	18.7663	1572.68	12.4417	1614.45	13.7835	1614.45	13.7835	95.4958
LEARY 1PS-4-Spot 286	271.566	107323	1.68085	9.9793	0.68	3.59883	1.21378	0.260585	1.00542	0.828335	1492.84	13.3981	1549.27	9.64489	1627.11	12.6433	1627.11	12.6433	91.7477
LEARY 1PS-4-Spot 97	64.0423	65915.6	1.18914	9.97518	0.714096	3.67355	1.21647	0.265885	0.984818	0.80957	1519.88	13.3344	1565.64	9.70921	1627.88	13.276	1627.88	13.276	93.3659
LEARY 1PS-4-Spot 270	106.143	49105.6	1.27314	9.95891	0.905944	3.85892	1.44315	0.278847	1.12336	0.778411	1585.55	15.7901	1605.13	11.6382	1630.91	16.8367	1630.91	16.8367	97.2188
LEARY 1PS-4-Spot 196	151.403	79669.5	2.61609	9.93708	0.663511	4.10085	1.01098	0.295679	0.762784	0.754498	1669.85	11.2213	1654.47	8.25305	1634.99	12.3258	1634.99	12.3258	102.132
LEARY 1PS-4-Spot 227	86.918	528063	2.00967	9.92984	0.767651	3.95087	1.15852	0.284657	0.867693	0.748964	1614.78	12.3943	1624.17	9.38769	1636.34	14.258	1636.34	14.258	98.682
LEARY 1PS-4-Spot 156	85.4916	122980	3.1684	9.92828	0.818181	3.88308	1.18332	0.279729	0.854883	0.722444	1590	12.0461	1610.17	9.55493	1636.64	15.1959	1636.64	15.1959	97.1505
LEARY 1PS-4-Spot 308	112.156	151083	1.15128	9.92757	0.791344	4.06151	1.40642	0.292563	1.16266	0.826684	1654.32	16.9645	1646.61	11.4596	1636.77	14.6972	1636.77	14.6972	101.073
LEARY 1PS-4-Spot 36	74.7954	420706	1.83379	9.9272	0.676239	3.98858	2.90649	0.287298	2.82673	0.972557	1628.01	40.6688	1631.87	23.6003	1636.84	12.5593	1636.84	12.5593	99.4608
LEARY 1PS-4-Spot 32	57.2337	69898.4	1.23475	9.92294	0.757867	4.00097	1.18182	0.288067	0.906831	0.767315	1631.86	13.0737	1634.39	9.60077	1637.63	14.0739	1637.63	14.0739	99.6476
LEARY 1PS-4-Spot 296	113.261	71175.8	1.63502	9.91283	0.773704	3.80815	1.51166	0.273905	1.29865	0.859089	1560.59	18	1594.47	12.1574	1639.53	14.3645	1639.53	14.3645	95.1855
LEARY 1PS-4-Spot 305	157.38	109461	1.09924	9.91033	0.922412	3.96989	1.47971	0.285466	1.15702	0.781923	1618.83	16.5635	1628.06	12.0021	1640	17.1245	1640	17.1245	98.7095
LEARY 1PS-4-Spot 216	107.249	237419	2.08546	9.9099	0.680478	4.09023	1.24625	0.294107	1.04408	0.837773	1662.02	15.2963	1652.36	10.1686	1640.07	12.6327	1640.07	12.6327	101.338
LEARY 1PS-4-Spot 194	274.927	152033	0.835609	9.90384	0.749779	3.98086	1.37626	0.286067	1.15409	0.838569	1621.85	16.5486	1630.3	11.1691	1641.21	13.9173	1641.21	13.9173	98.82
LEARY 1PS-4-Spot 26	174.724	571804	1.23018	9.89994	0.940872	3.73363	1.45509	0.268196	1.10997	0.762823	1531.64	15.1321	1578.61	11.654	1641.94	17.4628	1641.94	17.4628	93.2822
LEARY 1PS-4-Spot 109	236.9	684257	2.19922	9.8831	0.720048	3.99609	1.4575	0.28656	1.26721	0.869445	1624.32	18.1951	1633.4	11.8376	1645.1	13.3587	1645.1	13.3587	98.7367
LEARY 1PS-4-Spot 64	140.735	45998.3	2.01741	9.88277	0.736254	4.01528	1.36513	0.287927	1.14957	0.842096	1631.16	16.5671	1637.29	11.098	1645.16	13.6593	1645.16	13.6593	99.149
LEARY 1PS-4-Spot 15	56.4122	18805.9	1.29278	9.87694	0.69818	3.99635	1.25731	0.2864	1.04564	0.831652	1623.52	15.0072	1633.45	10.2117	1646.26	12.9511	1646.26	12.9511	98.6186
LEARY 1PS-4-Spot 247	178.892	284345	0.863304	9.8694	0.833722	4.14084	1.31848	0.296529	1.02142	0.774696	1674.07	15.0595	1662.4	10.7839	1647.67	15.4626	1647.67	15.4626	101.602
LEARY 1PS-4-Spot 113	74.5205	1.05208e+06	1.81438	9.86875	0.738639	3.92548	1.22504	0.281088	0.977316	0.79778	1596.84	13.8235	1618.95	9.91379	1647.8	13.6989	1647.8	13.6989	96.9076
LEARY 1PS-4-Spot 30	31.2997	64843.9	1.27975	9.8601	0.905519	3.78287	1.65097	0.270639	1.38048	0.836165	1544.05	18.9548	1589.12	13.2595	1649.42	16.7888	1649.42	16.7888	93.6114
LEARY 1PS-4-Spot 165	475.559	158123	3.2444	9.86006	0.666832	3.97569	1.60169	0.284433	1.45627	0.909213	1613.65	20.7889	1629.25	12.9954	1649.43	12.3645	1649.43	12.3645	97.8308
LEARY 1PS-4-Spot 91	184.751	257134	1.30585	9.85302	0.752341	4.00664	1.24163	0.286442	0.98774	0.795518	1623.72	14.1778	1635.54	10.0895	1650.75	13.946	1650.75	13.946	98.3626
LEARY 1PS-4-Spot 233	86.1843	48000.2	1.0856	9.84639	0.561886	3.94034	1.12351	0.281513	0.972908	0.865957	1598.98	13.7774	1622.01	9.099	1652	10.4151	1652	10.4151	96.7902
LEARY 1PS-4-Spot 306	65.392	38315.5	1.39473	9.8365	1.01925	4.13136	1.75992	0.294864	1.43472	0.815223	1665.79	21.0613	1660.53	14.3884	1653.86	18.887	1653.86	18.887	100.721
LEARY 1PS-4-Spot 274	110.136	99216.1	0.957175	9.83499	0.873493	3.89341	1.43138	0.277838	1.13395	0.792211	1580.46	15.8939	1612.32	11.5643	1654.15	16.1851	1654.15	16.1851	95.5454
LEARY 1PS-4-Spot 69	110.971	61900.9	1.3528	9.82331	0.792058	3.99301	1.7463	0.284607	1.55635	0.891224	1614.52	22.2281	1632.78	14.1813	1656.35	14.6719	1656.35	14.6719	97.4749
LEARY 1PS-4-Spot 60	374.912	169681	2.15891	9.81973	0.789909	4.07551	1.45582	0.290382	1.22289	0.839999	1643.44	17.7401	1649.42	11.8702	1657.03	14.6308	1657.03	14.6308	99.18
LEARY 1PS-4-Spot 181	98.5916	67338.4	0.527756	9.81195	0.841266	4.20603	1.45443	0.299444	1.18644	0.815742	1688.55	17.6247	1675.2	11.9319	1658.49	15.5793	1658.49	15.5793	101.812
LEARY 1PS-4-Spot 151	61.165	2.713e+06	1.24441	9.8076	0.782249	4.10697	1.41989	0.292262	1.18498	0.834557	1652.82	17.2763	1655.69	11.5948	1659.32	14.4847	1659.32	14.4847	99.6086
LEARY 1PS-4-Spot 221	120.309	107819	1.33933	9.80634	0.868047	4.04576	1.32123	0.287869	0.996061	0.75389	1630.87	14.3525	1643.45	10.7572	1659.55	16.0731	1659.55	16.0731	98.2718
LEARY 1PS-4-Spot 131	106.608	131058	2.32437	9.80239	0.823248	4.02422	1.25803	0.286221	0.951266	0.756154	1622.62	13.6461	1639.1	10.2317	1660.3	15.242	1660.3	15.242	97.7305
LEARY 1PS-4-Spot 201	174.764	374112	2.62684	9.7776	1.76847	4.24516	2.90886	0.301172	2.30955	0.793968	1697.12	34.4611	1682.8	23.9094	1664.98	32.7268	1664.98	32.7268	101.93
LEARY 1PS-4-Spot 76	341.757	266498	3.20184	9.7739	0.61967	4.12668	1.34725	0.292655	1.19628	0.887944	1654.78	17.4593	1659.6	11.0118	1665.68	11.4645	1665.68	11.4645	99.3456
LEARY 1PS-4-Spot 187	116.715	41112.1	2.10439	9.75382	1.01854	4.0667	1.58523	0.287809	1.21471	0.766269	1630.57	17.5003	1647.65	12.92	1669.49	18.8363	1669.49	18.8363	97.6689
LEARY 1PS-4-Spot 172	298.656	431458	3.153	9.7483	1.01083	4.02409	1.3877	0.284633	0.950755	0.68513	1614.65	13.5798	1639.08	11.2864	1670.53	18.6911	1670.53	18.6911	96.6547
LEARY 1PS-4-Spot 77	389.689	1.41197e+06	2.26421	9.73975	0.778788	4.21771	1.28074	0.298066	1.01675	0.793877	1681.71	15.0504	1677.47	10.5124	1672.16	14.397	1672.16	14.397	100.571
LEARY 1PS-4-Spot 28	129.311	95361.5	1.18495	9.73719	0.863041	3.96568	1.64261	0.280182	1.39762	0.850851	1592.28	19.7186	1627.2	13.3208	1672.64	15.9538	1672.64	15.9538	95.1953
LEARY 1PS-4-Spot 139	88.1974	117776	1.23625	9.73542	1.05861	4.05755	1.70352	0.28662	1.33466	0.783472	1624.62	19.1666	1645.82	13.878	1672.98	19.5687	1672.98	19.5687	97.1093
LEARY 1PS-4-Spot 285	318.826	1.66002e+06	3.4843	9.7247	0.722819	4.05218	1.23213	0.285925	0.997832	0.809846	1621.13	14.3025	1644.74	10.0348	1675.02	13.3573	1675.02	13.3573	96.7832
LEARY 1PS-4-Spot 225	128.044	134469	1.54851	9.71603	0.766742	4.05392	1.61244	0.285793	1.41848	0.879707	1620.47	20.3246	1645.09	13.1336	1676.66	14.1662	1676.66	14.1662	96.6486
LEARY 1PS-4-Spot 132	218.373	85639	1.85719	9.70668	0.65042	4.26065	1.41955	0.300078	1.26178	0.888856	1691.7	18.7744	1685.79	11.6745	1678.44	12.0157	1678.44	12.0157	100.79
LEARY 1PS-4-Spot 202	114.515	346145	1.71632	9.70641	0.766636	4.04744	1.49913	0.285053	1.28828	0.859351	1616.76	18.4219	1643.78	12.2067	1678.49	14.1626	1678.49	14.1626	96.3221
LEARY 1PS-4-Spot 199	175.666	818963	1.20713	9.68932	0.802468	4.05099	1.3335	0.284801	1.06502	0.798664	1615.5	15.2188	1644.5	10.8598	1681.75	14.8184	1681.75	14.8184	96.0605
LEARY 1PS-4-Spot 114	110.695	77319.8	1.01808	9.68288	0.884254	4.04267	1.37344	0.284028	1.05092	0.765175	1611.62	14.9857	1642.83	11.1806	1682.98	16.3262	1682.98	16.3262	95.7599
LEARY 1PS-4-Spot 277	78.1144	81797.4	4.7647	9.65634	0.823232	4.27346	1.56636	0.29942	1.33259	0.850751	1688.43	19.7945	1688.26	12.8893	1688.04	15.1897	1688.04	15.1897	100.023
LEARY 1PS-4-Spot 239	157.771	251054	1.17843	9.65217	0.795532	4.15141	1.7637	0.290742	1.57409	0.892494	1645.24	22.8569	1664.49	14.4329	1688.84	14.6771	1688.84	14.6771	97.4182
LEARY 1PS-4-Spot 62	116.336	130942	2.47037	9.63428	0.729879	4.18131	1.27021	0.292294	1.03957	0.818426	1652.98	15.1577	1670.36	10.4086	1692.26	13.4582	1692.26	13.4582	97.6789
LEARY 1PS-4-Spot 144	265.224	1.29939e+06	1.80998	9.61013	0.734932	4.36373	1.29433	0.304281	1.06544	0.82316	1712.5	16.0233	1705.5	10.6926	1696.89	13.5435	1696.89	13.5435	100.92
LEARY 1PS-4-Spot 313	378.217	273917	1.89544	9.59241	0.701967	4.36118	1.39702	0.303543	1.20785	0.864592	1708.85	18.1312	1705.02	11.5397	1700.29	12.9304	1700.29	12.9304	100.504
LEARY 1PS-4-Spot 242	199.853	2.48499e+06	2.91885	9.57755	0.627105	4.02533	1.19875	0.279733	1.02164	0.852252	1590.02	14.396	1639.33	9.75012	1703.14	11.547	1703.14	11.547	93.3578
LEARY 1PS-4-Spot 20	174.293	773097	3.509	9.56058	0.880082	4.34005	1.27149	0.301069	0.91769	0.721741	1696.61	13.6893	1701.01	10.4932	1706.41	16.1993	1706.41	16.1993	99.4259
LEARY 1PS-4-Spot 95	225.279	3.58583e+06	0.968219	9.55969	0.750777	4.07503	1.31726	0.282659	1.08236	0.821676	1604.74	15.3759	1649.32	10.7401	1706.58	13.8186	1706.58	13.8186	94.0325
LEARY 1PS-4-Spot 99	146.942	103159	2.01305	9.49704	0.692336	4.47153	1.46001	0.308129	1.28542	0.880418	1731.49	19.5185	1725.7	12.1159	1718.67	12.7252	1718.67	12.7252	100.746
LEARY 1PS-4-Spot 138	200.326	289870	2.80451	9.49174	0.78252	4.31184	1.3511	0.296959	1.10142	0.815205	1676.21	16.2571	1695.63	11.1366	1719.7	14.381	1719.7	14.381	97.4714
LEARY 1PS-4-Spot 266	194.503	532288	2.32874	9.47002	0.656725	4.56492	1.23116	0.313669	1.04138	0.845851	1758.74	16.0293	1742.89	10.255	1723.91	12.0627	1723.91	12.0627	102.02
LEARY 1PS-4-Spot 43	360.125	1.34775e+06	2.63327	9.44565	0.760438	4.55363	1.28512	0.312088	1.03599	0.806139	1750.98	15.885	1740.83	10.6997	1728.64	13.9576	1728.64	13.9576	101.292
LEARY 1PS-4-Spot 122	251.987	170961	5.01793	9.44409	0.931605	4.36244	1.53676	0.298936	1.22219	0.795302	1686.03	18.1321	1705.25	12.6948	1728.94	17.0993	1728.94	17.0993	97.518
LEARY 1PS-4-Spot 166	162.855	142274	2.02412	9.43929	0.724223	4.4504	1.58476	0.304807	1.4096	0.889471	1715.1	21.2273	1721.77	13.1398	1729.88	13.2908	1729.88	13.2908	99.1461
LEARY 1PS-4-Spot 19	215.378	94648.8	1.2725	9.43759	1.09307	4.47062	1.73749	0.306138	1.35059	0.77732	1721.67	20.4066	1725.53	14.4183	1730.21	20.0601	1730.21	20.0601	99.5069
LEARY 1PS-4-Spot 213	146.303	384051	4.2027	9.41554	0.845611	4.48163	1.36197	0.306174	1.06767	0.783912	1721.85	16.1333	1727.58	11.3069	1734.5	15.5099	1734.5	15.5099	99.2711
LEARY 1PS-4-Spot 78	174.056	98739.9	1.67196	9.36794	0.860329	4.43029	1.4853	0.301137	1.21077	0.815166	1696.94	18.0643	1718.02	12.3048	1743.79	15.7616	1743.79	15.7616	97.3138
LEARY 1PS-4-Spot 237	118.315	108676	1.5267	9.35181	0.690942	4.49897	1.06039	0.305279	0.804384	0.758571	1717.43	12.1276	1730.78	8.80927	1746.94	12.6529	1746.94	12.6529	98.3107
LEARY 1PS-4-Spot 169	221.401	502280	2.19972	9.34953	0.774537	4.57498	1.29074	0.310361	1.03252	0.799946	1742.48	15.7651	1744.72	10.7555	1747.39	14.1832	1747.39	14.1832	99.7193
LEARY 1PS-4-Spot 55	42.143	42151.2	2.66504	9.34613	0.843771	4.36916	1.36586	0.296291	1.07407	0.786367	1672.89	15.8258	1706.53	11.2861	1748.05	15.45	1748.05	15.45	95.7
LEARY 1PS-4-Spot 160	73.4422	106776	3.43855	9.33655	0.922972	4.65057	1.4436	0.315051	1.11	0.768912	1765.51	17.1428	1758.4	12.0646	1749.93	16.8964	1749.93	16.8964	100.891
LEARY 1PS-4-Spot 98	206.663	890930	1.62407	9.31045	0.837267	4.63579	1.44602	0.313171	1.17896	0.815317	1756.29	18.1251	1755.74	12.078	1755.06	15.3175	1755.06	15.3175	100.07
LEARY 1PS-4-Spot 66	168.004	265125	1.11162	9.30538	0.747396	4.35234	1.16888	0.293863	0.898706	0.768863	1660.8	13.1581	1703.34	9.65141	1756.05	13.6732	1756.05	13.6732	94.576
LEARY 1PS-4-Spot 189	82.2065	98766.7	1.87708	9.30042	0.764804	4.6356	1.28103	0.312821	1.02767	0.802223	1754.57	15.7856	1755.7	10.6996	1757.03	13.99	1757.03	13.99	99.8603
LEARY 1PS-4-Spot 288	173.848	98712.6	1.54047	9.30026	0.790175	4.60082	1.36323	0.310469	1.11087	0.814878	1743.01	16.9658	1749.42	11.3711	1757.06	14.454	1757.06	14.454	99.2007
LEARY 1PS-4-Spot 232	166.253	164754	2.36138	9.29668	0.670847	4.47277	1.2639	0.301711	1.07117	0.847512	1699.79	16.005	1725.93	10.4888	1757.76	12.2701	1757.76	12.2701	96.7019
LEARY 1PS-4-Spot 249	164.138	278949	1.19543	9.29449	0.831622	4.54764	1.37293	0.30669	1.09241	0.795673	1724.4	16.5284	1739.73	11.4281	1758.19	15.2101	1758.19	15.2101	98.0776
LEARY 1PS-4-Spot 18	255.665	203392	2.43973	9.27693	0.719378	4.48352	1.39463	0.301795	1.19477	0.856697	1700.2	17.8556	1727.93	11.5789	1761.65	13.1514	1761.65	13.1514	96.5117
LEARY 1PS-4-Spot 155	317.795	523883	13.3467	9.27468	0.801003	4.68968	1.56996	0.315595	1.35025	0.860052	1768.18	20.8805	1765.4	13.1401	1762.1	14.6429	1762.1	14.6429	100.345
LEARY 1PS-4-Spot 184	476.761	278974	0.913804	9.25495	0.816963	4.63663	1.77352	0.311361	1.57415	0.887584	1747.4	24.0939	1755.89	14.8142	1765.99	14.9256	1765.99	14.9256	98.9476
LEARY 1PS-4-Spot 214	552.506	476922	7.23021	9.24414	0.823147	4.5575	1.64639	0.30569	1.42584	0.866042	1719.46	21.5195	1741.53	13.7099	1768.12	15.0346	1768.12	15.0346	97.2478
LEARY 1PS-4-Spot 195	224.073	608390	1.88287	9.24124	0.649562	4.64728	1.44956	0.311614	1.29588	0.893979	1748.64	19.847	1757.8	12.1129	1768.7	11.8628	1768.7	11.8628	98.8663
LEARY 1PS-4-Spot 255	188.883	558472	4.37915	9.23852	0.704993	4.61961	1.19266	0.309667	0.961993	0.806592	1739.07	14.6631	1752.82	9.95545	1769.23	12.8745	1769.23	12.8745	98.295
LEARY 1PS-4-Spot 207	272.583	246737	1.79834	9.23584	0.93512	4.6365	1.32512	0.310709	0.938882	0.708525	1744.2	14.3475	1755.86	11.0684	1769.76	17.0767	1769.76	17.0767	98.5553
LEARY 1PS-4-Spot 229	595.143	1.04203e+06	1.95078	9.23464	0.726687	4.43845	1.24135	0.297398	1.00641	0.810743	1678.39	14.8717	1719.54	10.2871	1770	13.2694	1770	13.2694	94.8245
LEARY 1PS-4-Spot 183	158.072	1.57468e+06	3.50229	9.22473	0.788758	4.80284	1.31548	0.321469	1.05278	0.8003	1796.9	16.5096	1785.4	11.0557	1771.96	14.3996	1771.96	14.3996	101.407
LEARY 1PS-4-Spot 22	300.556	383560	3.24823	9.19069	0.749461	4.42354	1.35868	0.294989	1.13328	0.834104	1666.41	16.6417	1716.76	11.2526	1778.71	13.6707	1778.71	13.6707	93.6867
LEARY 1PS-4-Spot 61	180.858	88301.6	3.29495	9.17839	0.65633	4.87718	1.15749	0.324806	0.953425	0.823699	1813.16	15.0687	1798.32	9.75351	1781.15	11.968	1781.15	11.968	101.797
LEARY 1PS-4-Spot 133	177.505	122013	2.07899	9.16916	0.695725	4.64888	1.47338	0.30929	1.29878	0.881494	1737.21	19.7781	1758.09	12.3127	1782.98	12.6836	1782.98	12.6836	97.4328
LEARY 1PS-4-Spot 106	198.953	822591	3.93089	9.15246	0.994302	4.89698	1.4661	0.325203	1.07741	0.734881	1815.09	17.044	1801.74	12.3627	1786.31	18.1205	1786.31	18.1205	101.611
LEARY 1PS-4-Spot 226	201.822	849352	3.54091	9.15174	0.905493	4.59638	1.49967	0.305216	1.19545	0.797141	1717.12	18.0209	1748.61	12.5071	1786.45	16.5015	1786.45	16.5015	96.1192
LEARY 1PS-4-Spot 51	254.176	1.44344e+06	3.62445	9.1401	0.604926	4.87219	1.26915	0.32312	1.11571	0.8791	1804.95	17.5645	1797.46	10.6926	1788.77	11.0202	1788.77	11.0202	100.904
LEARY 1PS-4-Spot 85	39.2361	107531	3.02671	9.09093	1.05005	4.78283	1.59195	0.315487	1.19654	0.75162	1767.65	18.4987	1781.89	13.3699	1798.59	19.1058	1798.59	19.1058	98.2798
LEARY 1PS-4-Spot 309	179.93	267442	5.88148	9.08394	0.813527	4.18661	1.69396	0.275946	1.48583	0.877131	1570.91	20.7148	1671.4	13.8848	1799.99	14.8024	1799.99	14.8024	87.2735
LEARY 1PS-4-Spot 54	236.763	607052	2.82526	9.0777	0.821486	4.91503	1.23645	0.323735	0.924109	0.747387	1807.94	14.569	1804.84	10.4326	1801.24	14.9449	1801.24	14.9449	100.372
LEARY 1PS-4-Spot 47	324.928	1.15568e+06	5.43196	9.07037	0.883455	4.77889	1.59781	0.314514	1.33135	0.833237	1762.88	20.5347	1781.2	13.4172	1802.71	16.0676	1802.71	16.0676	97.7906
LEARY 1PS-4-Spot 197	34.9411	108312	0.79681	9.04573	1.05386	4.7336	1.54879	0.310687	1.13496	0.732804	1744.09	17.343	1773.21	12.984	1807.66	19.1556	1807.66	19.1556	96.4834
LEARY 1PS-4-Spot 73	687.859	224487	2.43737	9.04251	0.697938	4.69698	1.50359	0.308174	1.33179	0.88574	1731.71	20.2248	1766.7	12.5879	1808.3	12.6844	1808.3	12.6844	95.7646
LEARY 1PS-4-Spot 283	72.8161	118890	2.05488	9.03169	0.615939	4.858	1.37943	0.318357	1.23427	0.894775	1781.7	19.2138	1795	11.616	1810.48	11.1909	1810.48	11.1909	98.4104
LEARY 1PS-4-Spot 115	206.629	97963.3	2.60013	9.00339	0.724134	4.85643	1.64684	0.317257	1.47909	0.898139	1776.32	22.9644	1794.73	13.8673	1816.18	13.1479	1816.18	13.1479	97.8052
LEARY 1PS-4-Spot 63	529.044	512123	5.25475	8.97812	0.655373	4.89134	1.45688	0.318641	1.30115	0.893106	1783.09	20.2685	1800.77	12.2825	1821.28	11.8918	1821.28	11.8918	97.903
LEARY 1PS-4-Spot 198	132.555	91455.5	2.2857	8.89744	1.04969	5.17227	1.72314	0.333914	1.36651	0.793036	1857.32	22.0516	1848.07	14.6628	1837.64	19.0103	1837.64	19.0103	101.071
LEARY 1PS-4-Spot 128	108.769	113610	1.17504	8.89245	0.729825	4.67583	1.37443	0.301695	1.16465	0.84737	1699.71	17.401	1762.93	11.4974	1838.66	13.2168	1838.66	13.2168	92.4428
LEARY 1PS-4-Spot 260	232.448	2.19256e+06	1.24855	8.86475	0.844365	4.99677	1.39548	0.321398	1.11105	0.796172	1796.56	17.4205	1818.78	11.8072	1844.31	15.2788	1844.31	15.2788	97.4108
LEARY 1PS-4-Spot 177	106.993	168416	1.17909	8.856	0.762114	5.06758	1.30269	0.325631	1.0565	0.811011	1817.17	16.7298	1830.7	11.0477	1846.1	13.7872	1846.1	13.7872	98.4333
LEARY 1PS-4-Spot 278	479.97	273072	11.0715	8.82791	0.737726	5.10616	1.67959	0.32707	1.50891	0.898375	1824.16	23.9734	1837.13	14.2623	1851.84	13.3367	1851.84	13.3367	98.5054
LEARY 1PS-4-Spot 136	321.876	5.73642e+06	0.507138	8.73854	0.817783	5.27521	1.44121	0.334477	1.18672	0.823422	1860.05	19.1745	1864.86	12.3024	1870.21	14.7534	1870.21	14.7534	99.4563
LEARY 1PS-4-Spot 82	105.317	159468	553478	8.66321	0.70306	5.22084	1.20452	0.328176	0.978044	0.81198	1829.53	15.5786	1856.02	10.2648	1885.82	12.6579	1885.82	12.6579	97.0154
LEARY 1PS-4-Spot 298	261.873	165953	2.60694	8.65906	0.765961	5.37403	1.46587	0.337644	1.24983	0.852621	1875.32	20.3371	1880.72	12.5497	1886.68	13.7892	1886.68	13.7892	99.398
LEARY 1PS-4-Spot 2	130.817	271802	2.30307	8.64072	0.679579	5.25142	1.60636	0.329242	1.45553	0.906104	1834.7	23.2408	1861	13.7024	1890.49	12.2283	1890.49	12.2283	97.049
LEARY 1PS-4-Spot 271	461.738	445242	3.30545	8.55994	0.616254	5.57607	1.39471	0.346327	1.25118	0.897088	1917.04	20.7479	1912.41	12.0087	1907.38	11.0682	1907.38	11.0682	100.506
LEARY 1PS-4-Spot 222	195.496	102352	1.1942	8.53266	0.757767	5.39695	1.3125	0.334134	1.07166	0.8165	1858.39	17.302	1884.37	11.244	1913.11	13.6006	1913.11	13.6006	97.1395
LEARY 1PS-4-Spot 180	379.548	5.45985e+07	2.88276	8.45037	0.775508	5.15874	1.28132	0.316306	1.01998	0.796041	1771.66	15.8002	1845.84	10.8982	1930.48	13.8885	1930.48	13.8885	91.7731
LEARY 1PS-4-Spot 240	298.177	417475	4.06817	8.43506	0.871904	5.51631	1.403	0.337618	1.09918	0.783448	1875.2	17.8846	1903.14	12.0602	1933.73	15.6091	1933.73	15.6091	96.9731
LEARY 1PS-4-Spot 145	74.5869	86276.3	1.60947	8.27879	0.850385	5.72628	1.39688	0.343975	1.10821	0.793344	1905.76	18.2842	1935.34	12.0756	1967.14	15.164	1967.14	15.164	96.8799
LEARY 1PS-4-Spot 11	231.699	1.57373e+06	2.85644	8.21297	0.751317	5.5938	1.43249	0.333346	1.21965	0.85142	1854.58	19.6565	1915.14	12.3399	1981.37	13.377	1981.37	13.377	93.601
LEARY 1PS-4-Spot 302	102.286	154125	0.932691	8.1508	0.720209	6.0544	1.43372	0.358063	1.23969	0.864672	1972.98	21.0704	1983.7	12.4947	1994.88	12.8008	1994.88	12.8008	98.9022
LEARY 1PS-4-Spot 295	183.995	156212	1.33283	8.0734	0.721807	6.13498	1.26895	0.359383	1.04366	0.822459	1979.25	17.7866	1995.24	11.0793	2011.82	12.8042	2011.82	12.8042	98.3808
LEARY 1PS-4-Spot 234	622.612	1.42912e+06	2.79218	8.05882	0.812723	6.09332	1.72641	0.356298	1.52315	0.882262	1964.6	25.7941	1989.29	15.0595	2015.03	14.414	2015.03	14.414	97.4975
LEARY 1PS-4-Spot 204	176.332	234658	1.1464	7.9771	0.80334	5.97355	1.13692	0.345752	0.804502	0.707618	1914.28	13.3243	1972	9.88896	2033.09	14.2158	2033.09	14.2158	94.1564
LEARY 1PS-4-Spot 1	160.919	188903	1.67987	7.89315	0.767668	6.24463	1.31523	0.357639	1.06795	0.811986	1970.97	18.1355	2010.72	11.5117	2051.79	13.5576	2051.79	13.5576	96.0612
LEARY 1PS-4-Spot 137	242.57	316244	2.06394	7.8341	0.656667	5.85527	1.33223	0.332831	1.15914	0.87008	1852.09	18.6598	1954.63	11.5544	2065.04	11.5774	2065.04	11.5774	89.688
LEARY 1PS-4-Spot 159	449.386	930772	2.25533	7.81297	0.659666	6.45199	1.64117	0.365761	1.50275	0.915662	2009.42	25.9437	2039.38	14.4289	2069.8	11.624	2069.8	11.624	97.083
LEARY 1PS-4-Spot 135	207.1	665295	2.95802	7.79011	0.934923	6.00582	1.84748	0.339472	1.59345	0.862501	1884.13	26.0333	1976.69	16.0827	2074.96	16.4659	2074.96	16.4659	90.8032
LEARY 1PS-4-Spot 228	139.154	126688	2.08927	7.75612	0.726021	6.97058	1.489	0.392285	1.30001	0.873073	2133.41	23.6123	2107.69	13.2229	2082.66	12.775	2082.66	12.775	102.437
LEARY 1PS-4-Spot 13	142.997	189149	1.32484	7.43786	0.850964	7.24944	1.44225	0.391237	1.16445	0.807384	2128.56	21.1096	2142.61	12.8698	2156.08	14.8513	2156.08	14.8513	98.7238
LEARY 1PS-4-Spot 17	70.6247	84231.3	1.72178	6.08788	0.908796	9.88175	1.37629	0.436504	1.03357	0.750983	2334.97	20.2461	2423.81	12.6911	2499.25	15.2983	2499.25	15.2983	93.4267
LEARY 1PS-4-Spot 96	24.2945	82578.7	0.972021	5.77878	0.851708	11.4474	1.51835	0.479987	1.25698	0.827855	2527.21	26.2797	2560.3	14.1794	2586.59	14.2143	2586.59	14.2143	97.7042
LEARY 1PS-4-Spot 245	511.747	875913	2.26958	5.67615	0.83478	11.703	1.74925	0.481992	1.53721	0.878783	2535.94	32.2292	2580.94	16.3648	2616.46	13.8949	2616.46	13.8949	96.9225
LEARY 1PS-4-Spot 163	23.837	58353.6	2.33793	5.44292	0.845688	11.9518	1.4925	0.47201	1.22978	0.823975	2492.37	25.4208	2600.63	13.9854	2686.06	13.9803	2686.06	13.9803	92.7892
LEARY 1PS-4-Spot 103	77.1446	248456	1.34298	5.43783	0.854081	12.6886	1.51375	0.50064	1.24979	0.825627	2616.55	26.8786	2656.81	14.2484	2687.6	14.1171	2687.6	14.1171	97.3562
LEARY 1PS-4-Spot 126	62.4638	69887.9	1.62389	5.40116	0.911122	13.1926	1.44192	0.517016	1.11758	0.775066	2686.51	24.5535	2693.53	13.6102	2698.78	15.0445	2698.78	15.0445	99.5455
LEARY 1PS-4-Spot 5	224.859	1.48213e+06	1.29418	5.38447	0.666064	12.7788	1.11588	0.499254	0.89529	0.802318	2610.59	19.219	2663.49	10.5085	2703.89	10.9952	2703.89	10.9952	96.5495
LEARY 1PS-4-Spot 53	76.4916	346959	0.863919	5.36447	0.787934	13.3871	1.55266	0.521077	1.33787	0.861666	2703.75	29.5452	2707.35	14.6706	2710.03	12.9995	2710.03	12.9995	99.7681
LEARY 1PS-4-Spot 250	62.1677	159409	1.40178	5.35968	0.691686	13.0469	1.39405	0.50738	1.21035	0.868225	2645.44	26.2628	2683.05	13.148	2711.5	11.4099	2711.5	11.4099	97.5634
LEARY 1PS-4-Spot 238	278.862	5.87927e+06	20.439	5.31699	0.669046	13.0933	1.1452	0.505128	0.929437	0.811596	2635.8	20.1079	2686.4	10.8035	2724.69	11.0193	2724.69	11.0193	96.7376
LEARY 1PS-4-Spot 72	211.847	208247	2.23743	5.30713	0.692805	12.9299	1.28464	0.497902	1.08181	0.842114	2604.78	23.1811	2674.56	12.1082	2727.74	11.4076	2727.74	11.4076	95.492
LEARY 1PS-4-Spot 7	113.273	379681	1.60171	5.25059	0.755723	13.9148	1.13151	0.530116	0.842144	0.744263	2741.94	18.8084	2743.92	10.7193	2745.36	12.424	2745.36	12.424	99.8754
[truncated: 1,790 more rows]

## Sheet: Southern Arizona Basins
1WM-478							Isotope ratios						Apparent ages (Ma)
Analysis	U	206Pb	U/Th	206Pb*	±	207Pb*	±	206Pb*	±	error	206Pb*	±	207Pb*	±	206Pb*	±	Best age	±	Conc
	(ppm)	204Pb		207Pb*	(%)	235U*	(%)	238U	(%)	corr.	238U*	(Ma)	235U	(Ma)	207Pb*	(Ma)	(Ma)	(Ma)	(%)
1WM-478-Spot 1	528.685	138590	3.05537	10.1664	0.665576	3.0232	1.14364	0.223009	0.930016	0.813204	1297.75	10.9321	1413.49	8.72623	1593.31	12.431	1593.31	12.431	81.4504
1WM-478-Spot 2	315.63	69443.9	2.70805	12.5101	0.590482	2.18802	1.13289	0.19861	0.966832	0.853423	1167.85	10.3274	1177.24	7.89506	1195.4	11.6493	1195.4	11.6493	97.6953
1WM-478-Spot 3	138.964	146775	1.55293	6.59965	0.595554	7.64952	1.52551	0.366305	1.40446	0.920647	2011.99	24.2731	2190.69	13.6998	2363.17	10.1669	2363.17	10.1669	85.1394
1WM-478-Spot 4	85.7498	50528	0.438257	8.52567	0.63408	5.56716	1.31496	0.344389	1.15199	0.876059	1907.75	19.0235	1911.03	11.3193	1915.36	11.3775	1915.36	11.3775	99.6025
1WM-478-Spot 5	89.3842	60008.6	1.99775	4.14631	0.912804	20.2683	1.65683	0.609773	1.3827	0.834548	3069.09	33.764	3104.25	16.0335	3127.75	14.5205	3127.75	14.5205	98.1246
1WM-478-Spot 6	84.2943	51644.1	4.17336	5.1399	0.640337	14.6383	1.37985	0.545924	1.22228	0.885803	2808.2	27.825	2792.02	13.1156	2781.06	10.4918	2781.06	10.4918	100.976
1WM-478-Spot 7	434.851	70049.1	2.35911	12.29	0.595821	2.30743	0.992237	0.205763	0.79343	0.799638	1206.21	8.72837	1214.57	7.02894	1230.34	11.7116	1230.34	11.7116	98.0384
1WM-478-Spot 8	113.454	200420	0.963343	13.2329	0.806405	1.79069	2.73685	0.171935	2.61535	0.955606	1022.76	24.735	1042.08	17.8334	1083.66	16.1527	1083.66	16.1527	94.3805
1WM-478-Spot 9	112.73	24369.7	2.25895	11.0346	0.581093	2.90211	1.60328	0.232357	1.49427	0.932007	1346.84	18.1621	1382.46	12.108	1438.7	11.0781	1438.7	11.0781	93.615
1WM-478-Spot 10	685.128	36448.8	1.70587	17.8839	0.452327	0.529923	1.08094	0.0687643	0.981753	0.908237	428.707	4.07194	431.758	3.8017	449.019	10.0691	428.707	4.07194	95.4763
1WM-478-Spot 11	207.886	39156	3.19942	13.2949	0.581973	1.90851	1.14344	0.184106	0.98426	0.860787	1089.37	9.86518	1084.06	7.61861	1074.32	11.6814	1074.32	11.6814	101.401
1WM-478-Spot 12	418.421	134272	2.17931	9.91183	0.66027	3.81611	1.36453	0.27445	1.19415	0.875134	1563.35	16.5774	1596.15	10.9788	1640.52	12.2569	1640.52	12.2569	95.2959
1WM-478-Spot 13	880.755	187134	5.56171	13.1415	0.55879	1.6865	1.07556	0.160812	0.919017	0.854451	961.289	8.20728	1003.44	6.85603	1097.55	11.1745	1097.55	11.1745	87.5847
1WM-478-Spot 14	201.642	42031.4	1.45641	9.81207	0.754285	4.11042	1.38862	0.292641	1.16589	0.839609	1654.71	17.0151	1656.38	11.3412	1659.28	13.9668	1659.28	13.9668	99.7249
1WM-478-Spot 15	195.397	77500.3	3.11014	12.9495	0.715549	2.09112	1.33586	0.196482	1.12806	0.844443	1156.39	11.9417	1145.9	9.1763	1126.93	14.2577	1126.93	14.2577	102.614
1WM-478-Spot 17	501.955	31344.3	1.5042	17.9896	0.782567	0.513989	1.4467	0.067091	1.21677	0.841066	418.606	4.93162	421.128	4.98704	435.911	17.4253	418.606	4.93162	96.0301
1WM-478-Spot 18	198.236	144920	1.6961	8.727	0.717193	5.27108	1.41905	0.333774	1.22448	0.862884	1856.65	19.7534	1864.19	12.1117	1873.38	12.9337	1873.38	12.9337	99.1067
1WM-478-Spot 19	175.775	22065.1	25.8131	13.214	0.87749	1.89743	1.18401	0.181923	0.79492	0.671378	1077.47	7.88752	1080.19	7.87314	1086.54	17.5898	1086.54	17.5898	99.1651
1WM-478-Spot 20	118.172	39016.9	0.543287	10.0317	0.665146	3.94385	1.42349	0.287067	1.25854	0.884118	1626.86	18.0954	1622.73	11.5308	1618.18	12.3813	1618.18	12.3813	100.536
1WM-478-Spot 21	183.132	452142	1.37458	9.79806	0.686042	4.14389	1.54429	0.294602	1.38354	0.895906	1664.49	20.296	1663	12.6328	1661.92	12.6987	1661.92	12.6987	100.154
1WM-478-Spot 22	326.51	109317	0.81315	9.97157	0.672519	3.98406	1.27501	0.288255	1.08322	0.849579	1632.8	15.6247	1630.95	10.3491	1629.36	12.5006	1629.36	12.5006	100.211
1WM-478-Spot 23	150.712	20201.9	2.10739	10.9586	0.803769	3.11553	1.27024	0.247727	0.983601	0.774341	1426.75	12.589	1436.53	9.76419	1451.86	15.2961	1451.86	15.2961	98.2699
1WM-478-Spot 25	298.231	312925	2.17238	17.8248	0.818831	0.588012	1.42705	0.0760499	1.16876	0.819002	472.502	5.32488	469.597	5.36546	456.383	18.184	472.502	5.32488	103.532
1WM-478-Spot 26	511.309	246058	3.28879	12.4505	0.756305	2.23645	1.2645	0.202038	1.01339	0.801417	1186.26	10.9803	1192.54	8.87259	1204.79	14.8938	1204.79	14.8938	98.4624
1WM-478-Spot 27	80.6844	42279.6	1.65707	13.3701	0.791945	1.8837	1.35877	0.18274	1.10412	0.812586	1081.92	10.9971	1075.37	9.01256	1062.99	15.919	1062.99	15.919	101.781
1WM-478-Spot 28	221.745	264728	1.67953	9.85861	0.553693	4.00855	1.34232	0.286742	1.2228	0.910962	1625.23	17.566	1635.93	10.9088	1650.51	10.2652	1650.51	10.2652	98.4681
1WM-478-Spot 29	277.231	134556	7.76522	9.01047	0.715175	4.39863	2.39895	0.287576	2.28986	0.954528	1629.41	32.9694	1712.08	19.849	1815.54	12.9862	1815.54	12.9862	89.7476
1WM-478-Spot 30	108.1	36849	2.3295	11.9795	0.465576	2.51109	0.970886	0.218267	0.851973	0.877521	1272.71	9.83987	1275.25	7.05059	1280.35	9.05422	1280.35	9.05422	99.4031
1WM-478-Spot 31	198.456	51439.7	1.0817	12.896	0.678903	2.11335	1.32292	0.197749	1.13544	0.858279	1163.22	12.0846	1153.17	9.11842	1135.18	13.5242	1135.18	13.5242	102.47
1WM-478-Spot 32	36.0563	6178.56	1.88909	12.2077	0.977481	2.5346	1.46927	0.224508	1.09694	0.74659	1305.65	12.965	1282.02	10.6983	1243.49	19.1681	1243.49	19.1681	104.999
1WM-478-Spot 33	229.634	105634	1.55103	9.74439	0.778333	4.16068	1.5787	0.294175	1.37349	0.870017	1662.36	20.1261	1666.31	12.9244	1672.08	14.3887	1672.08	14.3887	99.4187
1WM-478-Spot 34	641.972	524290	5.46432	12.8322	0.554036	2.04531	0.856808	0.190435	0.653577	0.762805	1123.73	6.73996	1130.73	5.84313	1145.08	11.0104	1145.08	11.0104	98.1358
1WM-478-Spot 35	626.158	9271.99	2.54884	11.2815	0.815198	2.65486	1.59163	0.217318	1.36702	0.858879	1267.69	15.732	1316	11.7399	1396.39	15.6307	1396.39	15.6307	90.783
1WM-478-Spot 36	100.835	70730.7	2.32459	8.86559	0.681215	5.04705	1.10488	0.324663	0.869885	0.787314	1812.46	13.7438	1827.25	9.36376	1844.93	12.3252	1844.93	12.3252	98.2403
1WM-478-Spot 37	66.0749	29346.2	0.542395	5.33274	0.551581	13.1218	1.13569	0.507727	0.992751	0.874138	2646.92	21.551	2688.45	10.7154	2720.53	9.09096	2720.53	9.09096	97.2942
1WM-478-Spot 38	348.546	71215.2	5.74817	9.06681	0.648883	4.83088	2.50044	0.317811	2.41478	0.965741	1779.03	37.5419	1790.29	21.0378	1804.21	11.8004	1804.21	11.8004	98.6041
1WM-478-Spot 39	129.677	82249.1	3.40793	10.084	0.618045	3.92683	1.0873	0.287318	0.894556	0.822735	1628.11	12.8707	1619.23	8.7996	1608.49	11.5205	1608.49	11.5205	101.22
1WM-478-Spot 40	293.498	109528	2.50556	11.2439	0.46034	2.88117	1.13625	0.235058	1.03882	0.914255	1360.95	12.7452	1377	8.56485	1402.78	8.81884	1402.78	8.81884	97.0184
1WM-478-Spot 41	105.66	155302	0.812504	5.37288	0.627713	12.6324	1.42269	0.49247	1.27672	0.897401	2581.35	27.1576	2652.63	13.3868	2708.16	10.3579	2708.16	10.3579	95.3176
1WM-478-Spot 42	312.649	449001	2.91049	9.32193	0.601947	4.63583	1.15795	0.31356	0.989193	0.854264	1758.2	15.222	1755.74	9.67168	1753.6	11.0156	1753.6	11.0156	100.263
1WM-478-Spot 43	449.705	105808	7.94162	9.30967	0.637319	4.61048	1.16928	0.311436	0.980324	0.838401	1747.77	15.0076	1751.17	9.75679	1756.01	11.6594	1756.01	11.6594	99.5308
1WM-478-Spot 44	104.787	24450.9	2.46593	9.74994	0.822627	4.28686	1.22146	0.30327	0.902912	0.739207	1707.5	13.5444	1690.84	10.0569	1671.03	15.2097	1671.03	15.2097	102.183
1WM-478-Spot 45	205.885	354682	2.02755	5.19784	0.647343	13.3614	1.27506	0.503921	1.09851	0.861536	2630.62	23.7279	2705.53	12.0458	2762.67	10.628	2762.67	10.628	95.2203
1WM-478-Spot 46	439.308	408645	1.93531	5.37293	0.879916	13.3399	1.6646	0.520058	1.41302	0.848867	2699.43	31.1647	2704.01	15.7246	2708.15	14.5197	2708.15	14.5197	99.678
1WM-478-Spot 47	144.383	31797.5	3.48413	12.713	0.79146	2.15986	1.40554	0.199233	1.16152	0.826389	1171.2	12.4395	1168.23	9.75539	1163.56	15.696	1163.56	15.696	100.656
1WM-478-Spot 48	125.058	818229	4.61306	9.62568	0.683025	4.27136	1.12402	0.298322	0.892687	0.794194	1682.98	13.2227	1687.86	9.24822	1694.71	12.5902	1694.71	12.5902	99.308
1WM-478-Spot 49	87.2888	56186.6	2.49241	12.7803	0.644351	2.02761	1.21717	0.188024	1.03263	0.848382	1110.66	10.5354	1124.82	8.27705	1153.1	12.7869	1153.1	12.7869	96.32
1WM-478-Spot 50	63.3271	15501.9	2.62936	9.8248	0.72284	3.97664	1.41962	0.283483	1.22181	0.860661	1608.88	17.3965	1629.44	11.5186	1656.88	13.3886	1656.88	13.3886	97.1034
1WM-478-Spot 51	174.761	1.6489e+06	2.58889	13.0766	0.606332	1.98113	1.18059	0.187973	1.01299	0.858038	1110.39	10.3327	1109.1	7.96652	1107.44	12.1162	1107.44	12.1162	100.266
1WM-478-Spot 52	138.584	54040.6	1.28137	9.87423	0.690401	4.16406	1.29426	0.298338	1.09474	0.845843	1683.06	16.2163	1666.98	10.5973	1647.57	12.8046	1647.57	12.8046	102.154
1WM-478-Spot 53	276.138	35257.3	1.64533	9.09835	0.770699	4.21617	1.3902	0.278335	1.15701	0.832263	1582.97	16.2397	1677.17	11.4101	1797.9	14.0267	1797.9	14.0267	88.0458
1WM-478-Spot 54	104.467	55169.2	3.45676	11.3625	0.61659	2.88721	1.10267	0.238033	0.91417	0.829048	1376.47	11.3306	1378.58	8.31624	1382.67	11.8446	1382.67	11.8446	99.5515
1WM-478-Spot 55	196.351	72083.2	3.2819	13.7244	0.826869	1.67482	1.2529	0.166782	0.941303	0.751298	994.356	8.67376	999.018	7.9658	1010.13	16.7631	1010.13	16.7631	98.4389
1WM-478-Spot 57	263.868	173819	8.45974	8.86447	0.850759	5.13707	1.35355	0.330413	1.05276	0.777778	1840.38	16.8546	1842.26	11.5048	1845.15	15.3929	1845.15	15.3929	99.7414
1WM-478-Spot 58	176.628	72621.9	1.07139	9.81639	0.70141	4.14867	1.29405	0.295494	1.08747	0.840361	1668.92	15.99	1663.95	10.5879	1658.46	12.989	1658.46	12.989	100.631
1WM-478-Spot 59	62.5212	9928.84	8.10113	12.1948	0.697606	2.44912	1.42374	0.216706	1.24113	0.871734	1264.45	14.2502	1257.16	10.2655	1245.55	13.6629	1245.55	13.6629	101.517
1WM-478-Spot 60	73.9592	26295.5	2.76302	13.3642	0.747702	1.87121	1.45576	0.181449	1.24907	0.858021	1074.89	12.3665	1070.96	9.63366	1063.87	15.0286	1063.87	15.0286	101.036
1WM-478-Spot 61	295.451	51845.4	3.02392	12.8947	0.764119	1.70153	1.89173	0.159198	1.73054	0.914792	952.321	15.3208	1009.11	12.0988	1135.38	15.2006	1135.38	15.2006	83.8766
1WM-478-Spot 62	529.347	35446.6	1.36875	18.3863	0.765066	0.450373	1.31445	0.0600836	1.06886	0.813159	376.134	3.90531	377.541	4.14448	387.136	17.1811	376.134	3.90531	NA
1WM-478-Spot 63	284.335	359141	2.16229	5.85626	0.651632	11.2678	1.19764	0.478794	1.00485	0.839024	2522.01	20.9731	2545.54	11.1699	2565.07	10.9005	2565.07	10.9005	98.3214
1WM-478-Spot 65	1051.33	233949	2.50199	9.10509	0.588139	4.86679	0.8791	0.321525	0.653382	0.74324	1797.17	10.2477	1796.52	7.40487	1796.55	10.7059	1796.55	10.7059	100.035
1WM-478-Spot 66	99.4448	50825.6	2.87396	9.82892	0.818166	4.00274	1.34972	0.285464	1.07347	0.79533	1618.82	15.3674	1634.75	10.9658	1656.1	15.156	1656.1	15.156	97.7491
1WM-478-Spot 67	192.462	110566	1.12646	8.20037	0.522619	6.00939	1.10749	0.357562	0.976423	0.881655	1970.61	16.5786	1977.2	9.64123	1984.87	9.30117	1984.87	9.30117	99.2814
1WM-478-Spot 68	97.2046	289721	2.42875	8.92785	0.618234	4.86981	2.68741	0.315462	2.61533	0.973179	1767.53	40.4314	1797.05	22.6425	1832.25	11.2047	1832.25	11.2047	96.4676
1WM-478-Spot 70	88.2492	84166	2.71525	8.93473	0.769707	4.9647	1.29133	0.321856	1.03686	0.80294	1798.79	16.2748	1813.33	10.9141	1830.85	13.9505	1830.85	13.9505	98.2485
1WM-478-Spot 71	91.2271	10133.7	1.42064	13.5944	1.30096	1.67579	1.60219	0.165298	0.935167	0.583679	986.151	8.5514	999.386	10.1889	1029.4	26.3221	1029.4	26.3221	95.7986
1WM-478-Spot 72	98.2291	27318.2	1.33744	17.8681	0.970419	0.568992	1.47766	0.0737688	1.11435	0.754129	458.821	4.93515	457.362	5.4412	450.984	21.564	458.821	4.93515	101.738
1WM-478-Spot 73	128.799	30049.8	3.72736	9.41859	0.622507	4.46676	1.01708	0.305257	0.804324	0.790817	1717.33	12.1261	1724.82	8.43836	1734.7	11.4169	1734.7	11.4169	98.9984
1WM-478-Spot 74	123.374	30286.8	2.21296	12.3935	0.631213	2.36231	1.17385	0.212432	0.989693	0.843118	1241.76	11.1784	1231.28	8.37435	1213.84	12.4202	1213.84	12.4202	102.3
1WM-478-Spot 75	192.772	149566	2.19575	9.53585	0.619973	4.21744	1.24923	0.291808	1.08453	0.868161	1650.56	15.7929	1677.42	10.2537	1711.97	11.403	1711.97	11.403	96.4125
1WM-478-Spot 76	114.703	31898.7	1.39799	8.93109	0.579734	5.01991	1.10166	0.325303	0.936788	0.850339	1815.58	14.8229	1822.69	9.32819	1831.59	10.5077	1831.59	10.5077	99.1255
1WM-478-Spot 77	185.272	36977.3	2.19145	11.053	0.607721	3.07633	1.17138	0.246719	1.00141	0.854892	1421.53	12.7751	1426.81	8.97644	1435.51	11.5907	1435.51	11.5907	99.0261
1WM-478-Spot 78	62.406	33311.3	3.2661	8.74417	0.593282	5.36449	1.37244	0.340357	1.23759	0.901739	1888.39	20.2586	1879.2	11.7465	1869.84	10.7036	1869.84	10.7036	100.992
1WM-478-Spot 79	342.645	55209.7	2.84186	12.9014	0.634881	2.02304	0.997368	0.189378	0.769201	0.77123	1118.01	7.89529	1123.28	6.77723	1134.35	12.6511	1134.35	12.6511	98.5593
1WM-478-Spot 80	114.729	27826.5	3.50498	12.0293	0.744405	2.46521	1.32505	0.21517	1.09619	0.827278	1256.31	12.5126	1261.89	9.57195	1272.28	14.5055	1272.28	14.5055	98.7446
1WM-478-Spot 81	16.5515	39474.3	1.09887	13.0613	1.58087	1.9198	2.00603	0.181941	1.23491	0.6156	1077.57	12.2543	1088	13.3935	1109.78	31.581	1109.78	31.581	97.0974
1WM-478-Spot 82	338.914	865483	1.30414	9.84478	0.665996	3.98045	1.32765	0.284332	1.14852	0.86508	1613.14	16.3911	1630.22	10.7744	1653.11	12.3415	1653.11	12.3415	97.5823
1WM-478-Spot 83	290.549	1.00345e+06	8.96943	12.1385	0.926117	2.30776	1.7496	0.203256	1.48439	0.848415	1192.79	16.1641	1214.68	12.395	1254.61	18.1131	1254.61	18.1131	95.0725
1WM-478-Spot 84	230.018	31075.8	1.49061	9.66878	0.49535	4.3045	1.30093	0.301983	1.20293	0.924671	1701.13	17.9861	1694.22	10.7196	1686.47	9.14157	1686.47	9.14157	100.869
1WM-478-Spot 85	132.537	91416.7	2.52054	10.916	0.752419	3.22388	1.37785	0.255346	1.15427	0.837732	1465.99	15.1353	1462.92	10.6786	1459.27	14.3046	1459.27	14.3046	100.46
1WM-478-Spot 86	17.4483	10898.5	1.34779	13.506	1.33591	1.88042	1.87741	0.184276	1.3191	0.702616	1090.29	13.2316	1074.21	12.4454	1042.57	26.9763	1042.57	26.9763	104.577
1WM-478-Spot 87	412.457	2.26264e+06	2.96752	10.9704	0.757851	3.17596	1.33525	0.252805	1.09935	0.823324	1452.93	14.3007	1451.33	10.3116	1449.8	14.4262	1449.8	14.4262	100.215
1WM-478-Spot 88	171.068	38702.5	2.05454	9.83392	0.729007	4.0875	1.35969	0.291657	1.14774	0.844119	1649.8	16.7067	1651.81	11.0928	1655.16	13.5058	1655.16	13.5058	99.6765
1WM-478-Spot 89	176.377	172943	1.05606	13.3835	0.732859	1.77297	2.19039	0.172171	2.06415	0.942367	1024.06	19.5447	1035.61	14.2212	1060.96	14.7466	1060.96	14.7466	96.5217
1WM-478-Spot 90	352.727	556243	2.41217	3.16197	1.57549	30.4225	2.62239	0.697975	2.09638	0.799413	3412.97	55.5529	3500.56	25.7855	3551.73	24.2706	3551.73	24.2706	96.0932
1WM-478-Spot 91	176.914	66618.1	1.0528	9.85891	0.572977	4.13175	1.15448	0.295564	1.00226	0.868147	1669.27	14.7398	1660.61	9.43839	1650.45	10.6228	1650.45	10.6228	101.14
1WM-478-Spot 92	483.588	88114.9	3.05386	9.02869	0.515595	4.75155	1.11272	0.311277	0.986055	0.886167	1746.99	15.0894	1776.38	9.33421	1811.87	9.36581	1811.87	9.36581	96.4189
1WM-478-Spot 94	130.849	343361	1.63739	5.2024	0.506699	13.8226	1.26394	0.521772	1.15793	0.916127	2706.69	25.5938	2737.63	11.9686	2761.23	8.31998	2761.23	8.31998	98.0248
1WM-478-Spot 95	269.215	124950	2.20844	12.056	0.702499	2.52819	1.25388	0.221156	1.03861	0.828317	1287.98	12.1255	1280.18	9.12336	1267.98	13.7147	1267.98	13.7147	101.578
1WM-478-Spot 96	14.0358	48234.3	1.44584	13.2757	1.29273	1.82491	1.65698	0.175788	1.03655	0.625565	1043.92	9.99007	1054.45	10.8693	1077.22	25.9468	1077.22	25.9468	96.909
1WM-478-Spot 97	169.018	36858.1	6.44459	14.0113	0.661327	1.53096	1.30597	0.155643	1.12614	0.862305	932.517	9.77727	942.883	8.0214	968.052	13.5148	968.052	13.5148	96.3292
1WM-478-Spot 98	202.489	1.98615e+06	1.00923	9.83343	0.618364	4.02188	1.10762	0.286961	0.918942	0.829653	1626.32	13.2088	1638.63	9.00733	1655.25	11.4556	1655.25	11.4556	98.2525
1WM-478-Spot 99	280.605	218232	2.58709	8.48661	0.79025	4.89326	1.4064	0.301314	1.16338	0.827208	1697.82	17.3652	1801.1	11.8577	1923.6	14.164	1923.6	14.164	88.2629
1WM-478-Spot 100	62.3196	1.54592e+06	2.92116	10.9353	1.14345	3.02618	1.98856	0.240112	1.62692	0.818142	1387.28	20.3067	1414.24	15.1776	1455.91	21.7489	1455.91	21.7489	95.2864
1WM-478-Spot 101	100.822	62246.2	2.68226	10.7463	0.721215	3.34795	1.09784	0.261051	0.827713	0.753945	1495.22	11.0456	1492.31	8.58371	1489	13.6568	1489	13.6568	100.418
1WM-478-Spot 102	145.671	425822	2.18526	4.49972	0.828923	17.2349	1.53885	0.562706	1.29651	0.84252	2877.8	30.0955	2948	14.7694	2996.95	13.3267	2996.95	13.3267	96.0245
1WM-478-Spot 103	136.776	272748	3.73913	13.6571	0.684825	1.79097	1.08296	0.177473	0.838944	0.774673	1053.16	8.15142	1042.18	7.05642	1020.09	13.8652	1020.09	13.8652	103.242
1WM-478-Spot 104	177.427	30874.3	2.19781	10.8375	1.75395	3.29764	2.79513	0.25931	2.17633	0.778616	1486.31	28.889	1480.5	21.7807	1472.98	33.2858	1472.98	33.2858	100.905
1WM-478-Spot 105	64.1837	85300	1.04693	10.7274	0.793383	3.26119	1.41781	0.25384	1.17504	0.828773	1458.25	15.3352	1471.85	11.0182	1492.33	15.0167	1492.33	15.0167	97.7164
1WM-478-Spot 106	62.153	70814.9	2.30492	13.2722	0.793826	1.89448	1.3016	0.182441	1.0315	0.792489	1080.3	10.2596	1079.16	8.6504	1077.74	15.9334	1077.74	15.9334	100.237
1WM-478-Spot 107	98.2711	24517.4	2.49604	9.98269	0.684273	3.81703	1.4882	0.276478	1.32155	0.888023	1573.6	18.4523	1596.34	11.9745	1627.29	12.7225	1627.29	12.7225	96.7008
1WM-478-Spot 108	92.4041	843777	2.45129	9.41076	0.716901	4.37496	1.4503	0.298735	1.26072	0.869283	1685.03	18.694	1707.62	11.9869	1736.23	13.1459	1736.23	13.1459	97.0514
1WM-478-Spot 109	108.88	33144.5	3.67827	9.89689	0.471115	4.04605	1.01118	0.290548	0.894726	0.884834	1644.27	12.9853	1643.51	8.2328	1643.32	8.74231	1643.32	8.74231	100.058
1WM-478-Spot 110	173.977	304797	4.42405	8.44567	0.731385	5.68121	1.27493	0.348147	1.04428	0.819087	1925.74	17.3844	1928.52	11.0082	1932.26	13.0954	1932.26	13.0954	99.6628
1WM-478-Spot 111	66.0854	86791.2	2.04279	10.6138	0.587925	3.39121	1.0681	0.261165	0.891728	0.834874	1495.8	11.904	1502.37	8.37571	1512.44	11.0965	1512.44	11.0965	98.8995
1WM-478-Spot 112	173.448	395510	2.22978	13.3024	0.67338	1.84342	1.3579	0.177928	1.17918	0.868382	1055.64	11.4822	1061.08	8.9391	1073.18	13.5156	1073.18	13.5156	98.3658
1WM-478-Spot 113	371.626	19088.2	2.32758	5.56129	0.81084	11.3872	1.35695	0.459494	1.08805	0.801835	2437.32	22.0824	2555.38	12.6666	2651.15	13.4486	2651.15	13.4486	91.9348
1WM-478-Spot 114	244.322	4.4122e+06	2.61186	8.8768	0.641225	4.96535	1.51152	0.319811	1.36877	0.905557	1788.81	21.3812	1813.44	12.7756	1842.64	11.6047	1842.64	11.6047	97.0786
1WM-478-Spot 115	161.119	171944	1.30567	7.4865	0.577086	7.12762	0.906007	0.387178	0.698441	0.770901	2109.73	12.5669	2127.5	8.06774	2145.46	10.0825	2145.46	10.0825	98.3344
1WM-478-Spot 116	82.8837	25470.2	3.77394	9.40387	0.714206	4.55693	1.23808	0.310933	1.01131	0.816839	1745.3	15.4629	1741.43	10.3093	1737.57	13.0943	1737.57	13.0943	100.445
1WM-478-Spot 117	31.4579	6502.67	1.40047	11.9954	0.92706	2.56638	1.3549	0.22337	0.988093	0.729271	1299.66	11.6301	1291.11	9.90024	1277.76	18.0639	1277.76	18.0639	101.714
1WM-478-Spot 118	125.662	18972.4	2.28347	17.9964	0.918642	0.525224	1.74241	0.0685831	1.48057	0.849726	427.614	6.12572	428.635	6.09252	435.078	20.4593	427.614	6.12572	98.2843
1WM-478-Spot 119	48.0312	64110.1	0.594869	5.3716	0.779002	13.3512	1.33105	0.520367	1.07928	0.81085	2700.74	23.8131	2704.81	12.5741	2708.56	12.8539	2708.56	12.8539	99.7114
1WM-478-Spot 120	249.275	141676	12.6287	14.0194	0.619913	1.52771	1.26825	0.155403	1.10642	0.872399	931.177	9.5932	941.58	7.78318	966.886	12.6432	966.886	12.6432	96.3068
1WM-478-Spot 121	159.834	32453.3	1.41531	10.1035	0.658799	3.94162	1.04386	0.288958	0.809709	0.775687	1636.32	11.7016	1622.27	8.4545	1604.89	12.2859	1604.89	12.2859	101.959
1WM-478-Spot 122	113.645	32255.8	2.52994	10.0184	0.670577	3.97437	1.23408	0.288903	1.03599	0.839484	1636.05	14.9694	1628.98	10.0119	1620.65	12.4784	1620.65	12.4784	100.95
1WM-478-Spot 124	266.965	72703.3	16.2285	13.3039	0.516236	1.84679	1.17151	0.178273	1.05163	0.897674	1057.53	10.257	1062.28	7.71695	1072.96	10.3504	1072.96	10.3504	98.5623
1WM-478-Spot 125	108.691	48438.3	1.75811	9.77825	0.78254	3.88739	1.4336	0.275808	1.20118	0.837878	1570.22	16.7397	1611.07	11.5786	1665.66	14.4783	1665.66	14.4783	94.2696
1WM-478-Spot 126	103.963	25755.1	3.02558	12.8511	0.806162	1.99346	1.32427	0.185882	1.05061	0.793353	1099.03	10.6159	1113.3	8.95469	1142.13	16.0094	1142.13	16.0094	96.2261
1WM-478-Spot 127	459.082	57404	2.53666	12.6908	0.68375	2.107	1.04595	0.194017	0.791513	0.756742	1143.1	8.29099	1151.1	7.20228	1167.03	13.5618	1167.03	13.5618	97.9498
1WM-478-Spot 128	651.422	138853	3.37506	5.21147	0.575499	12.7597	1.12325	0.48249	0.964615	0.858774	2538.1	20.2381	2662.07	10.5767	2758.37	9.45223	2758.37	9.45223	92.0146
1WM-478-Spot 129	144.66	74977.7	3.38887	8.39809	0.5518	5.76855	1.2659	0.351507	1.1393	0.899997	1941.79	19.1018	1941.7	10.9551	1942.37	9.86958	1942.37	9.86958	99.9703
1WM-478-Spot 130	182.646	73014	2.79738	9.77882	0.692589	3.87727	1.27554	0.275106	1.07113	0.839747	1566.67	14.8976	1608.96	10.2965	1665.56	12.814	1665.56	12.814	94.0627
1WM-478-Spot 131	104.521	12731.9	1.31163	16.4047	1.05036	0.862473	1.41935	0.10266	0.954618	0.672573	629.979	5.72938	631.472	6.67393	637.779	22.6193	629.979	5.72938	98.7771
1WM-478-Spot 132	305.251	63028.9	3.78224	16.0335	0.704454	0.931745	1.33879	0.108396	1.13847	0.85037	663.427	7.17727	668.552	6.55688	686.814	15.0338	663.427	7.17727	96.5949
1WM-478-Spot 133	58.6939	186789	1.27529	8.94703	0.615994	4.9213	1.04253	0.319482	0.841086	0.806772	1787.2	13.1281	1805.92	8.79819	1828.36	11.1694	1828.36	11.1694	97.7487
1WM-478-Spot 134	164.405	60676.1	5.04532	11.7179	0.775986	2.64054	1.35044	0.224508	1.10523	0.818423	1305.65	13.063	1312.01	9.94596	1323.24	15.0312	1323.24	15.0312	98.6704
1WM-478-Spot 135	42.2014	91205.3	1.20798	5.40074	0.756291	12.9633	1.30446	0.507992	1.06284	0.814778	2648.05	23.0806	2676.99	12.2973	2699.62	12.4864	2699.62	12.4864	98.0897
1WM-478-Spot 136	128.273	95096.9	1.91018	9.42428	0.629975	4.48829	1.17312	0.306914	0.989619	0.843577	1725.5	14.9816	1728.81	9.74159	1733.59	11.5555	1733.59	11.5555	99.5334
1WM-478-Spot 137	100.699	30003.7	5.02168	5.49083	0.533671	12.8764	1.39904	0.513002	1.29325	0.924387	2669.43	28.2673	2670.65	13.1826	2672.27	8.83564	2672.27	8.83564	99.8936
1WM-478-Spot 138	100.24	90761.5	1.16833	9.83404	0.584263	4.12155	1.39539	0.29409	1.26718	0.90812	1661.94	18.5641	1658.59	11.4026	1655.14	10.8239	1655.14	10.8239	100.411
1WM-478-Spot 139	78.7705	50508.9	2.06572	9.85827	0.711559	3.99368	1.18841	0.285668	0.951838	0.800936	1619.84	13.6337	1632.91	9.65075	1650.57	13.1902	1650.57	13.1902	98.1383
1WM-478-Spot 140	89.7908	22654.2	1.33718	14.7219	0.800769	1.14906	1.41881	0.122743	1.17124	0.825505	746.33	8.25426	776.8	7.70295	866.316	16.6034	746.33	8.25426	86.1498
1WM-478-Spot 141	19.0518	21488.2	2.63266	5.08792	0.601426	14.2999	1.01287	0.527912	0.814982	0.804625	2732.65	18.1523	2769.81	9.61262	2797.7	9.84283	2797.7	9.84283	97.675
1WM-478-Spot 142	397.445	253996	4.41631	11.4739	0.593125	2.76678	1.2929	0.230343	1.14882	0.888563	1336.29	13.865	1346.62	9.64301	1363.89	11.4245	1363.89	11.4245	97.977
1WM-478-Spot 143	937.126	48982.8	1.88879	9.47162	0.507066	3.77079	0.974825	0.259146	0.832567	0.854068	1485.47	11.046	1586.55	7.82361	1724.4	9.31314	1724.4	9.31314	86.1445
1WM-478-Spot 144	984.52	397832	2.58323	9.44687	0.499796	4.5474	0.950452	0.311701	0.808432	0.850576	1749.07	12.3841	1739.68	7.9112	1729.2	9.17407	1729.2	9.17407	101.149
1WM-478-Spot 145	249.919	3.4396e+07	1.73993	4.66282	0.566245	16.6146	0.999138	0.562118	0.82319	0.823901	2875.38	19.0956	2912.86	9.56941	2939.56	9.14732	2939.56	9.14732	97.8167
1WM-478-Spot 147	435.303	187393	0.815915	11.1209	0.60899	2.79406	1.03537	0.225456	0.837329	0.808726	1310.64	9.93068	1353.95	7.74221	1423.84	11.6333	1423.84	11.6333	92.05
1WM-478-Spot 148	243.071	131748	4.49503	8.7371	0.655125	5.26219	1.408	0.333597	1.2463	0.885159	1855.79	20.0974	1862.75	12.0141	1871.3	11.8173	1871.3	11.8173	99.1715
1WM-478-Spot 149	88.474	142826	2.53954	5.79363	0.676969	12.0389	1.26201	0.506086	1.06507	0.843951	2639.9	23.0714	2607.44	11.832	2583.03	11.3043	2583.03	11.3043	102.201
1WM-478-Spot 150	77.875	49995.9	0.903726	10.3507	0.808967	3.66441	1.51202	0.275207	1.27741	0.844837	1567.18	17.7717	1563.65	12.0619	1559.69	15.1741	1559.69	15.1741	100.48
1WM-478-Spot 151	297.734	639810	2.19168	8.50221	0.496204	5.42524	1.15895	0.334686	1.04735	0.903708	1861.06	16.9305	1888.85	9.93661	1920.31	8.89631	1920.31	8.89631	96.9146
1WM-478-Spot 152	239.179	422042	1.13003	8.81055	0.59801	5.19999	1.18425	0.332425	1.02217	0.863137	1850.12	16.4397	1852.62	10.0855	1856.18	10.8048	1856.18	10.8048	99.6736
1WM-478-Spot 153	221.238	184753	2.12736	9.41541	0.624868	4.36653	1.08445	0.298307	0.886322	0.817303	1682.91	13.1279	1706.03	8.95968	1735.32	11.4593	1735.32	11.4593	96.9795
1WM-478-Spot 154	86.9583	8687.09	2.57228	11.9595	0.779832	2.45559	1.17822	0.213087	0.883208	0.749614	1245.24	10.0011	1259.07	8.50156	1283.6	15.1799	1283.6	15.1799	97.0121
1WM-478-Spot 155	90.1834	136294	1.31214	9.88862	0.808581	4.00442	1.15962	0.287318	0.831216	0.716799	1628.11	11.9594	1635.09	9.42203	1644.87	15.0017	1644.87	15.0017	98.9811
1WM-478-Spot 156	135.709	53364.3	3.11601	13.1906	0.658995	1.87408	1.04589	0.179366	0.812169	0.776532	1063.51	7.96262	1071.97	6.92489	1090.08	13.1914	1090.08	13.1914	97.5621
1WM-478-Spot 157	390.44	1.02702e+06	3.14068	9.96483	0.632176	3.9795	1.25947	0.287731	1.08932	0.864903	1630.18	15.6904	1630.02	10.2206	1630.62	11.7487	1630.62	11.7487	99.9731
1WM-478-Spot 158	104.444	22929.5	2.67796	9.68894	0.785508	4.19254	1.37142	0.294741	1.12417	0.819715	1665.18	16.4972	1672.56	11.2438	1682.62	14.5036	1682.62	14.5036	98.9633
1WM-478-Spot 159	39.7069	15446.1	0.994798	9.84589	0.882288	3.98808	1.28412	0.284909	0.933018	0.726584	1616.04	13.3365	1631.77	10.4251	1652.9	16.3507	1652.9	16.3507	97.7698
1WM-478-Spot 160	165.117	24924.4	1.7157	16.9503	0.750587	0.739741	1.20914	0.0909799	0.94796	0.783998	561.33	5.09609	562.254	5.2204	566.965	16.3414	561.33	5.09609	99.006
1WM-478-Spot 161	525.942	1.95543e+06	1.54979	9.71016	0.569194	4.18636	1.14576	0.294952	0.994378	0.867875	1666.23	14.6005	1671.35	9.39097	1678.59	10.5149	1678.59	10.5149	99.2637
1WM-478-Spot 162	117.161	40276.8	1.56631	9.98375	0.722013	4.08209	1.38891	0.295709	1.18649	0.854262	1669.99	17.4558	1650.73	11.3282	1627.09	13.4246	1627.09	13.4246	102.637
1WM-478-Spot 163	443.056	141245	1.45229	9.09626	0.567372	4.79331	1.07488	0.316363	0.912942	0.849341	1771.94	14.144	1783.73	9.03049	1798.32	10.3256	1798.32	10.3256	98.5335
1WM-478-Spot 164	213.821	32048.8	2.88509	13.4219	0.657559	1.80658	1.24525	0.175938	1.05748	0.84921	1044.75	10.1992	1047.84	8.13907	1055.19	13.2617	1055.19	13.2617	99.01
1WM-478-Spot 165	368.514	730316	4.51684	9.18974	0.627091	4.67186	1.26928	0.311516	1.10355	0.869432	1748.16	16.8974	1762.21	10.6162	1779.69	11.4368	1779.69	11.4368	98.2285
1WM-478-Spot 166	259.975	47886.7	2.80396	9.9484	0.750511	3.92306	1.23342	0.283183	0.9788	0.793568	1607.37	13.9249	1618.45	9.9803	1633.68	13.9427	1633.68	13.9427	98.3895
1WM-478-Spot 167	250.449	92739.8	1.98357	18.1077	0.750286	0.513072	1.18528	0.0674108	0.917579	0.774148	420.538	3.73559	420.512	4.08104	421.324	16.7482	420.538	3.73559	99.8134
1WM-478-Spot 168	601.537	71134.5	2.07003	14.1466	0.565416	1.51327	1.20955	0.15533	1.06926	0.884014	930.773	9.26723	935.762	7.39499	948.437	11.5781	948.437	11.5781	98.1376
1WM-478-Spot 169	93.6014	69977.6	1.31227	9.98374	0.647557	3.97049	1.34213	0.287624	1.17558	0.875904	1629.64	16.928	1628.19	10.8864	1627.09	12.04	1627.09	12.04	100.157
1WM-478-Spot 170	87.0183	54924.6	0.753943	5.37178	0.746798	12.9323	1.42239	0.504058	1.21057	0.851083	2631.21	26.1533	2674.73	13.4068	2708.5	12.3226	2708.5	12.3226	97.1465
1WM-478-Spot 171	106.629	22966.2	2.35543	12.4147	0.55087	2.29615	1.14429	0.206835	1.00297	0.876497	1211.93	11.0811	1211.1	8.09411	1210.47	10.8515	1210.47	10.8515	100.121
1WM-478-Spot 172	294.653	134025	4.7319	4.75593	1.02634	16.0644	1.60748	0.554355	1.23718	0.769641	2843.26	28.444	2880.64	15.3667	2907.57	16.6333	2907.57	16.6333	97.7883
1WM-478-Spot 173	326.478	58054.4	1.68907	9.89518	0.586213	3.96018	1.03085	0.284332	0.847946	0.822567	1613.14	12.1014	1626.08	8.35707	1643.64	10.8777	1643.64	10.8777	98.1444
1WM-478-Spot 174	81.9497	39995.7	1.75506	9.27698	0.835219	4.62633	1.30264	0.311409	0.999638	0.767395	1747.64	15.3022	1754.03	10.8763	1762.44	15.2677	1762.44	15.2677	99.1602
1WM-478-Spot 175	305.739	235481	1.5171	13.4582	0.597646	1.83613	1.08427	0.179299	0.904687	0.834375	1063.14	8.86686	1058.48	7.12773	1049.76	12.066	1049.76	12.066	101.275
1WM-478-Spot 176	168.989	937656	2.09979	12.8343	0.565813	2.05953	1.21072	0.191791	1.07038	0.884081	1131.07	11.1041	1135.46	8.27558	1144.72	11.2453	1144.72	11.2453	98.8074
1WM-478-Spot 177	155.486	28899.3	2.15442	12.228	0.766149	2.30787	1.25316	0.204764	0.991683	0.791344	1200.86	10.8653	1214.71	8.87793	1240.24	15.016	1240.24	15.016	96.825
1WM-478-Spot 178	728.432	89365	1.21254	13.1541	0.564673	1.91124	1.11221	0.182416	0.9582	0.861531	1080.16	9.52943	1085.02	7.41412	1095.67	11.2842	1095.67	11.2842	98.5843
1WM-478-Spot 179	694.968	211161	4.74133	9.12718	0.535001	4.37251	1.0767	0.289571	0.934374	0.867814	1639.39	13.5254	1707.16	8.89793	1792.14	9.74388	1792.14	9.74388	91.4766
1WM-478-Spot 180	70.7448	73726.6	1.49988	9.77979	0.626971	4.07319	1.14717	0.289036	0.960675	0.837434	1636.71	13.8862	1648.95	9.35238	1665.37	11.6	1665.37	11.6	98.2788
1WM-478-Spot 181	1255.59	16416.6	3.59286	17.1871	0.802263	0.491829	1.24222	0.0613344	0.948409	0.76348	383.735	3.53318	406.156	4.15839	536.668	17.5735	383.735	3.53318	NA
1WM-478-Spot 182	36.6326	49859.1	2.08012	11.1278	0.768611	3.12101	1.23234	0.251996	0.963269	0.781662	1448.76	12.4985	1437.88	9.47683	1422.64	14.6849	1422.64	14.6849	101.836
1WM-478-Spot 183	267.334	2.01412e+06	2.16712	8.229	0.530314	5.74748	1.0795	0.343173	0.940262	0.871014	1901.91	15.4863	1938.54	9.33688	1978.67	9.44499	1978.67	9.44499	96.121
1WM-478-Spot 184	135.777	44415.5	1.48398	13.8501	0.578422	1.71987	1.1463	0.172836	0.989665	0.863354	1027.72	9.40167	1015.98	7.36011	991.646	11.7619	991.646	11.7619	103.638
1WM-478-Spot 185	642.741	135520	0.672692	16.9304	0.596705	0.767262	1.08682	0.0942539	0.908358	0.835797	580.647	5.04379	578.191	4.79107	569.522	12.9964	580.647	5.04379	101.953
1WM-478-Spot 186	152.088	50693.3	1.72712	16.3484	0.975029	0.880537	1.37651	0.10445	0.971646	0.705877	640.437	5.92366	641.272	6.54456	645.174	20.9565	640.437	5.92366	99.2658
1WM-478-Spot 187	325.971	1.49153e+06	5.6364	7.58951	0.719191	6.68708	1.42721	0.368246	1.23275	0.863753	2021.14	21.388	2070.92	12.6071	2121.55	12.5995	2121.55	12.5995	95.2673
1WM-478-Spot 188	279.537	42212.9	1.82775	13.2533	0.694627	1.86407	1.35549	0.179256	1.16398	0.858714	1062.91	11.4058	1068.43	8.95809	1080.62	13.9364	1080.62	13.9364	98.361
1WM-478-Spot 189	183.829	30292.4	2.78046	12.7652	0.581954	2.09091	1.15866	0.193665	1.00191	0.864713	1141.2	10.4788	1145.83	7.95871	1155.44	11.5469	1155.44	11.5469	98.7669
1WM-478-Spot 190	579.384	39903.3	1.77548	16.7427	1.01774	0.787803	1.48097	0.0957044	1.07586	0.726455	589.186	6.05777	589.925	6.62645	593.734	22.0515	589.186	6.05777	99.2341
1WM-478-Spot 191	419.377	255871	3.90218	18.1003	0.664201	0.540912	1.22897	0.0710394	1.03402	0.841374	442.415	4.42123	439.026	4.38049	422.241	14.8247	442.415	4.42123	104.778
1WM-478-Spot 192	53.3888	40984.4	0.921358	9.95756	0.56912	3.68884	2.82657	0.26652	2.76868	0.97952	1523.12	37.559	1568.95	22.5832	1631.97	10.5764	1631.97	10.5764	93.3297
1WM-478-Spot 193	36.1355	9182.91	1.31541	13.9942	0.998167	1.62167	1.52836	0.164664	1.15739	0.757274	982.645	10.5486	978.637	9.59959	970.563	20.3634	970.563	20.3634	101.245
1WM-478-Spot 194	248.589	815910	2.73283	7.05904	0.660118	7.45041	1.04593	0.381604	0.811306	0.775678	2083.77	14.4455	2167.05	9.36371	2247.61	11.4077	2247.61	11.4077	92.7106
1WM-478-Spot 195	292.796	228014	3.1517	5.00827	0.687897	14.1046	1.12177	0.51255	0.886091	0.789907	2667.51	19.3564	2756.77	10.6365	2823.49	11.2278	2823.49	11.2278	94.4755
1WM-478-Spot 196	430.208	535484	3.26318	16.3701	0.75057	0.839904	1.41711	0.0997626	1.20202	0.848218	613.018	7.0291	619.092	6.56864	642.323	16.1407	613.018	7.0291	95.4375
1WM-478-Spot 198	483.882	27455	1.03569	18.1512	0.712722	0.526311	1.21466	0.0693162	0.983582	0.809757	432.035	4.11015	429.358	4.25292	415.971	15.9251	432.035	4.11015	103.862
1WM-478-Spot 199	277.986	89134.6	1.27972	12.7422	0.636005	2.06546	1.35175	0.190963	1.19278	0.882397	1126.59	12.3291	1137.43	9.24825	1159.01	12.6195	1159.01	12.6195	97.203
1WM-478-Spot 200	326.488	34157.4	1.92445	13.2035	0.70706	1.90091	1.95835	0.182111	1.82625	0.932547	1078.5	18.1367	1081.41	13.0308	1088.14	14.17	1088.14	14.17	99.1137
1WM-478-Spot 201	42.0583	15054	63.6684	9.58776	0.709607	4.33398	1.10586	0.301503	0.848162	0.766972	1698.76	12.6661	1699.85	9.12381	1701.98	13.0683	1701.98	13.0683	99.8105
1WM-478-Spot 202	223.211	115734	1.74293	12.5801	0.610553	2.16915	1.23148	0.197998	1.06948	0.868445	1164.56	11.3945	1171.21	8.55886	1184.4	12.0441	1184.4	12.0441	98.3249
[truncated: 780 more rows]

## Sheet: Eagle Basin-CCT (this study)
EC01							Isotope ratios						Apparent ages (Ma)
[truncated: 1,983 more rows]

[truncated: 5 more sheets: Denver Basin (this study), Paradox Basin (this study), Keeler Basin, Lone-Pine Basin, SW Montana (this study)]
