# Supplementary material
Source: publisher figshare collection journal article supplement (https://gsapubs.figshare.com/ndownloader/files/23319257)
Supplement: Supplementary file 1 [file 23319257 › FileDR4. DZstats_input_data.xlsx]

## Sheet: PlotDat6
Source sheet	Sheet1	0	0	350	0	0	0
Plot name	ProbDens4	1.5	0	400	0	2998.5	0
Plot Type	16	3	0	400	1
1st free col	9	4.5	0	350	1
Sigma Level	1	6	0	350	0
Absolute Errs	TRUE	7.5	0	ErrBox	ErrBox
Symbol Type	1	9	0	400	0
Inverse Plot	FALSE	10.5	0	450	0
Color Plot	TRUE	12	0	450	3
3D plot	FALSE	13.5	0	400	3
Linear	FALSE	15	0	400	0
Data Range	G2:H102	16.5	0	ErrBox	ErrBox
Filled Symbols	FALSE	18	0	450	0
ConcAge	FALSE	19.5	0	500	0
ConcSwap	FALSE	21	0	500	4
1st Symbol-row	1	22.5	0	450	4
		24	0	450	0
		25.5	0	ErrBox	ErrBox
		27	0	700	0
		28.5	0	750	0
		30	0	750	1
		31.5	0	700	1
		33	0	700	0
		34.5	0	ErrBox	ErrBox
		36	0	900	0
		37.5	0	950	0
		39	0	950	1
		40.5	0	900	1
		42	0	900	0
		43.5	0	ErrBox	ErrBox
		45	0	950	0
		46.5	0	1000	0
		48	0	1000	6
		49.5	0	950	6
		51	0	950	0
		52.5	0	ErrBox	ErrBox
		54	0	1000	0
		55.5	0	1050	0
		57	0	1050	17
		58.5	0	1000	17
		60	0	1000	0
		61.5	0	ErrBox	ErrBox
		63	0	1050	0
		64.5	0	1100	0
		66	0	1100	10
		67.5	0	1050	10
		69	0	1050	0
		70.5	0	ErrBox	ErrBox
		72	0	1100	0
		73.5	0	1150	0
		75	0	1150	10
		76.5	0	1100	10
		78	0	1100	0
		79.5	0	ErrBox	ErrBox
		81	0	1150	0
		82.5	0	1200	0
		84	0	1200	5
		85.5	0	1150	5
		87	0	1150	0
		88.5	0	ErrBox	ErrBox
		90	0	1200	0
		91.5	0	1250	0
		93	0	1250	10
		94.5	0	1200	10
		96	0	1200	0
		97.5	0	ErrBox	ErrBox
		99	0	1250	0
		100.5	0	1300	0
		102	0	1300	4
		103.5	0	1250	4
		105	0	1250	0
		106.5	0	ErrBox	ErrBox
		108	0	1300	0
		109.5	0	1350	0
		111	0	1350	3
		112.5	0	1300	3
		114	0	1300	0
		115.5	0	ErrBox	ErrBox
		117	0	1350	0
		118.5	0	1400	0
		120	0	1400	1
		121.5	0	1350	1
		123	0	1350	0
		124.5	0	ErrBox	ErrBox
		126	0	1400	0
		127.5	0	1450	0
		129	0	1450	8
		130.5	0	1400	8
		132	0	1400	0
		133.5	0	ErrBox	ErrBox
		135	0	1450	0
		136.5	0	1500	0
		138	0	1500	1
		139.5	0	1450	1
		141	0	1450	0
		142.5	0	ErrBox	ErrBox
		144	0	1500	0
		145.5	0	1550	0
		147	0	1550	2
		148.5	0	1500	2
		150	0	1500	0
		151.5	0	ErrBox	ErrBox
		153	0	1600	0
		154.5	0	1650	0
		156	0	1650	3
		157.5	0	1600	3
		159	0	1600	0
		160.5	0	ErrBox	ErrBox
		162	0	1650	0
		163.5	0	1700	0
		165	0	1700	2
		166.5	0	1650	2
		168	0	1650	0
		169.5	0	ErrBox	ErrBox
		171	0	1700	0
		172.5	0	1750	0
		174	0	1750	1
		175.5	0	1700	1
		177	0	1700	0
		178.5	0	ErrBox	ErrBox
		180	0	1750	0
		181.5	0	1800	0
		183	0	1800	1
		184.5	0	1750	1
		186	0	1750	0
		187.5	0	ErrBox	ErrBox
		189	0	1800	0
		190.5	0	1850	0
		192	0	1850	1
		193.5	0	1800	1
		195	0	1800	0
		196.5	0	ErrBox	ErrBox
		198	0	1850	0
		199.5	0	1900	0
		201	0	1900	1
		202.5	0	1850	1
		204	0	1850	0
		205.5	0	ErrBox	ErrBox
		207	0	2000	0
		208.5	0	2050	0
		210	0	2050	1
		211.5	0	2000	1
		213	0	2000	0
		214.5	1.01366e-08	ErrBox	ErrBox
		216	1.06456e-08	2050	0
		217.5	1.11785e-08	2100	0
		219	1.17363e-08	2100	1
		220.5	1.23201e-08	2050	1
		222	1.29311e-08	2050	0
		223.5	1.35703e-08	ErrBox	ErrBox
		225	1.42389e-08	2600	0
		226.5	1.49383e-08	2650	0
		228	1.56697e-08	2650	1
		229.5	1.64344e-08	2600	1
		231	2.78933e-08	2600	0
		232.5	3.01e-08	ErrBox	ErrBox
		234	3.25095e-08	2750	0
		235.5	3.51417e-08	2800	0
		237	3.80184e-08	2800	1
		238.5	4.11635e-08	2750	1
		240	4.46031e-08	2750	0
		241.5	4.83659e-08	ErrBox	ErrBox
		243	5.24831e-08	2800	0
		244.5	5.69886e-08	2850	0
		246	6.19198e-08	2850	1
		247.5	6.73171e-08	2800	1
		249	7.32245e-08	2800	0
		250.5	7.969e-08	ErrBox	ErrBox
		252	8.67656e-08
		253.5	1.05056e-07
		255	1.15252e-07
		256.5	1.26506e-07
		258	1.38928e-07
		259.5	1.52638e-07
		261	1.67767e-07
		262.5	1.84459e-07
		264	2.02872e-07
		265.5	2.23177e-07
		267	2.45564e-07
		268.5	2.70236e-07
		270	2.9742e-07
		271.5	3.27357e-07
		273	3.71898e-07
		274.5	4.10494e-07
		276	4.53151e-07
		277.5	5.00283e-07
		279	5.52347e-07
		280.5	6.09843e-07
		282	6.73318e-07
		283.5	7.43372e-07
		285	8.20661e-07
		286.5	9.05899e-07
		288	9.99868e-07
		289.5	1.10342e-06
		291	1.21749e-06
		292.5	1.34307e-06
		294	1.49137e-06
		295.5	1.6553e-06
		297	1.82476e-06
		298.5	2.02449e-06
		300	2.2339e-06
		301.5	2.46493e-06
		303	2.71986e-06
		304.5	3.00124e-06
		306	3.31189e-06
		307.5	3.65499e-06
		309	4.0341e-06
		310.5	4.45321e-06
		312	4.9168e-06
		313.5	5.42993e-06
		315	5.99825e-06
		316.5	6.62814e-06
		318	7.32678e-06
		319.5	8.10222e-06
		321	8.97477e-06
		322.5	9.93556e-06
		324	1.10046e-05
		325.5	1.21948e-05
		327	1.35204e-05
		328.5	1.49971e-05
		330	1.66425e-05
		331.5	1.84757e-05
		333	2.05175e-05
		334.5	2.27906e-05
		336	2.53193e-05
		337.5	2.81299e-05
		339	3.12501e-05
		340.5	3.4709e-05
		342	3.8537e-05
		343.5	4.27657e-05
		345	4.74389e-05
		346.5	5.25679e-05
		348	5.81945e-05
		349.5	6.43502e-05
		351	7.10648e-05
		352.5	7.83665e-05
		354	8.62805e-05
		355.5	9.48288e-05
		357	0.000104029
		358.5	0.000113894
		360	0.000124445
		361.5	0.000135661
		363	0.000147546
		364.5	0.000160088
		366	0.000173268
		367.5	0.000187059
		369	0.000201426
		370.5	0.000216325
		372	0.000231709
		373.5	0.000247521
		375	0.000263699
		376.5	0.000280175
		378	0.000296878
		379.5	0.000313742
		381	0.000330673
		382.5	0.0003476
		384	0.000364448
		385.5	0.00038114
		387	0.000397604
		388.5	0.000413771
		390	0.000429587
		391.5	0.000444974
		393	0.000459891
		394.5	0.000474293
		396	0.000488144
		397.5	0.000501413
		399	0.00051408
		400.5	0.000526129
		402	0.000537554
		403.5	0.000548364
		405	0.000558543
		406.5	0.000568112
		408	0.000577095
		409.5	0.000585492
		411	0.000593334
		412.5	0.000600643
		414	0.000607447
		415.5	0.000613769
		417	0.000619638
		418.5	0.000625078
		420	0.000630115
		421.5	0.000634773
		423	0.000639074
		424.5	0.000643038
		426	0.000646693
		427.5	0.000650037
		429	0.000653091
		430.5	0.000655866
		432	0.000658369
		433.5	0.000660605
		435	0.000662575
		436.5	0.000664276
		438	0.000665703
		439.5	0.000666846
		441	0.000667702
		442.5	0.000668235
		444	0.000668436
		445.5	0.000668281
		447	0.000667745
		448.5	0.0006668
		450	0.000665416
		451.5	0.000663561
		453	0.000661204
		454.5	0.000658311
		456	0.000654852
		457.5	0.000650797
		459	0.000646117
		460.5	0.000640789
		462	0.00063479
		463.5	0.000628105
		465	0.000620721
		466.5	0.000612634
		468	0.000603843
		469.5	0.000594354
		471	0.000584182
		472.5	0.000573345
		474	0.000561869
		475.5	0.000549786
		477	0.000537135
		478.5	0.000523957
		480	0.000510301
		481.5	0.000496218
		483	0.000481764
		484.5	0.000466995
		486	0.000451971
		487.5	0.000436753
		489	0.000421399
		490.5	0.000405962
		492	0.000390519
		493.5	0.000375115
		495	0.000359805
		496.5	0.000344638
		498	0.000329663
		499.5	0.000314924
		501	0.00030046
		502.5	0.000286308
		504	0.000272499
		505.5	0.000259071
		507	0.000246038
		508.5	0.000233408
		510	0.000221208
		511.5	0.000209449
		513	0.00019814
		514.5	0.000187297
		516	0.000176903
		517.5	0.000166967
		519	0.000157488
		520.5	0.00014846
		522	0.000139878
		523.5	0.000131734
		525	0.000124019
		526.5	0.000116723
		528	0.000109834
		529.5	0.000103333
		531	9.72249e-05
		532.5	9.1486e-05
		534	8.61135e-05
		535.5	8.10738e-05
		537	7.63628e-05
		538.5	7.19668e-05
		540	6.78718e-05
		541.5	6.40641e-05
		543	6.053e-05
		544.5	5.72561e-05
		546	5.4229e-05
		547.5	5.1436e-05
		549	4.88641e-05
		550.5	4.65013e-05
		552	4.43353e-05
		553.5	4.23547e-05
		555	4.05482e-05
		556.5	3.8905e-05
		558	3.74149e-05
		559.5	3.60678e-05
		561	3.48645e-05
		562.5	3.37761e-05
		564	3.28038e-05
		565.5	3.19393e-05
		567	3.11751e-05
		568.5	3.05038e-05
		570	2.99186e-05
		571.5	2.94052e-05
		573	2.89752e-05
		574.5	2.86042e-05
		576	2.83058e-05
		577.5	2.80649e-05
		579	2.7877e-05
		580.5	2.77379e-05
		582	2.76438e-05
		583.5	2.75913e-05
		585	2.7577e-05
		586.5	2.75979e-05
		588	2.76512e-05
		589.5	2.77344e-05
		591	2.78451e-05
		592.5	2.79811e-05
		594	2.81406e-05
		595.5	2.83216e-05
		597	2.85225e-05
		598.5	2.87419e-05
		600	2.89887e-05
		601.5	2.92415e-05
		603	2.95089e-05
		604.5	2.979e-05
		606	3.00838e-05
		607.5	3.03894e-05
		609	3.07159e-05
		610.5	3.10534e-05
		612	3.13909e-05
		613.5	3.17284e-05
		615	3.20761e-05
		616.5	3.24526e-05
		618	3.28265e-05
		619.5	3.32072e-05
		621	3.35945e-05
		622.5	3.39984e-05
		624	3.43985e-05
		625.5	3.48044e-05
		627	3.5216e-05
		628.5	3.56241e-05
		630	3.60477e-05
		631.5	3.64762e-05
		633	3.69095e-05
		634.5	3.73474e-05
		636	3.779e-05
		637.5	3.8237e-05
		639	3.86886e-05
		640.5	3.91445e-05
		642	3.96048e-05
		643.5	4.00693e-05
		645	4.05481e-05
		646.5	4.10219e-05
		648	4.15e-05
		649.5	4.19823e-05
		651	4.24689e-05
		652.5	4.29598e-05
		654	4.34551e-05
		655.5	4.39546e-05
		657	4.44585e-05
		658.5	4.49668e-05
		660	4.54795e-05
		661.5	4.59967e-05
		663	4.65185e-05
		664.5	4.70448e-05
		666	4.75758e-05
		667.5	4.81116e-05
		669	4.86521e-05
		670.5	4.91878e-05
		672	4.97394e-05
		673.5	5.02959e-05
		675	5.08574e-05
		676.5	5.14241e-05
		678	5.19961e-05
		679.5	5.25735e-05
		681	5.31564e-05
		682.5	5.3745e-05
		684	5.43393e-05
		685.5	5.49396e-05
		687	5.55563e-05
		688.5	5.61795e-05
		690	5.67999e-05
		691.5	5.74376e-05
		693	5.80723e-05
		694.5	5.8714e-05
		696	5.93628e-05
		697.5	6.0029e-05
		699	6.06932e-05
		700.5	6.13652e-05
		702	6.20556e-05
		703.5	6.27444e-05
		705	6.34515e-05
		706.5	6.41579e-05
		708	6.48831e-05
		709.5	6.56082e-05
		711	6.63425e-05
		712.5	6.70865e-05
		714	6.78403e-05
		715.5	6.86041e-05
		717	6.93784e-05
		718.5	7.01735e-05
		720	7.097e-05
		721.5	7.17778e-05
		723	7.26071e-05
		724.5	7.34391e-05
		726	7.42831e-05
		727.5	7.51397e-05
		729	7.6009e-05
		730.5	7.68914e-05
		732	7.77872e-05
		733.5	7.86969e-05
		735	7.96206e-05
		736.5	8.05689e-05
		738	8.15227e-05
		739.5	8.24918e-05
		741	8.34765e-05
		742.5	8.44773e-05
		744	8.54945e-05
		745.5	8.65385e-05
		747	8.75901e-05
		748.5	8.86595e-05
		750	8.97673e-05
		751.5	9.08746e-05
		753	9.2001e-05
		754.5	9.3147e-05
		756	9.43131e-05
		757.5	9.54996e-05
		759	9.67072e-05
		760.5	9.79464e-05
		762	9.91981e-05
		763.5	0.000100473
		765	0.00010178
		766.5	0.000103113
		768	0.000104471
		769.5	0.000105844
		771	0.000107244
		772.5	0.000108669
		774	0.000110122
		775.5	0.000111602
		777	0.000113111
		778.5	0.000114649
		780	0.000116216
		781.5	0.000117814
		783	0.000119443
		784.5	0.000121104
		786	0.000122818
		787.5	0.000124547
		789	0.000126331
		790.5	0.000128131
		792	0.000129967
		793.5	0.00013184
		795	0.000133751
		796.5	0.000135702
		798	0.000137703
		799.5	0.000139735
		801	0.00014181
		802.5	0.000143938
		804	0.000146111
		805.5	0.00014832
		807	0.000150575
		808.5	0.000152878
		810	0.00015523
		811.5	0.000157632
		813	0.000160095
		814.5	0.000162602
		816	0.000165163
		817.5	0.000167779
		819	0.000170451
		820.5	0.000173182
		822	0.000175973
		823.5	0.000178825
		825	0.00018175
		826.5	0.000184731
		828	0.000187779
		829.5	0.000190894
		831	0.00019408
		832.5	0.000197338
		834	0.00020067
		835.5	0.000204078
		837	0.000207564
		838.5	0.000211131
		840	0.00021478
		841.5	0.000218525
		843	0.000222349
		844.5	0.000226263
		846	0.00023027
		847.5	0.000234373
		849	0.000238587
		850.5	0.000242904
		852	0.000247329
		853.5	0.000251853
		855	0.000256492
		856.5	0.000261248
		858	0.000266127
		859.5	0.000271142
		861	0.00027628
		862.5	0.000281554
		864	0.000286971
		865.5	0.000292534
		867	0.000298252
		868.5	0.000304128
		870	0.000310181
		871.5	0.000316399
		873	0.000322797
		874.5	0.000329383
		876	0.000336164
		877.5	0.000343159
		879	0.000350356
		880.5	0.000357774
		882	0.00036542
		883.5	0.000373303
		885	0.000381433
		886.5	0.000389819
		888	0.000398479
		889.5	0.000407402
		891	0.000416608
		892.5	0.000426103
		894	0.000435897
		895.5	0.000446007
		897	0.000456422
		898.5	0.000467156
		900	0.000478238
		901.5	0.00048963
		903	0.000501357
		904.5	0.000513422
		906	0.000525847
		907.5	0.000538596
		909	0.000551685
		910.5	0.000565113
		912	0.000578875
		913.5	0.000592969
		915	0.000607397
		916.5	0.000622132
		918	0.000637184
		919.5	0.000652523
		921	0.000668156
		922.5	0.000684051
		924	0.000700201
		925.5	0.000716591
		927	0.000733205
		928.5	0.000750023
		930	0.000767027
		931.5	0.000784198
		933	0.000801517
		934.5	0.000818964
		936	0.000836519
		937.5	0.000854164
		939	0.000871879
		940.5	0.000889646
		942	0.00090745
		943.5	0.000925284
		945	0.000943114
		946.5	0.000960938
		948	0.000978743
		949.5	0.000996522
		951	0.00101427
		952.5	0.00103197
		954	0.00104963
		955.5	0.00106725
		957	0.00108483
		958.5	0.00110236
		960	0.00111986
		961.5	0.00113733
		963	0.00115479
		964.5	0.00117223
		966	0.00118968
		967.5	0.00120713
		969	0.0012246
		970.5	0.00124212
		972	0.00125968
		973.5	0.00127731
		975	0.001295
		976.5	0.00131277
		978	0.00133064
		979.5	0.0013486
		981	0.00136667
		982.5	0.00138485
		984	0.00140315
		985.5	0.00142154
		987	0.00144004
		988.5	0.00145863
		990	0.0014773
		991.5	0.00149605
		993	0.00151485
		994.5	0.00153368
		996	0.00155252
		997.5	0.00157134
		999	0.00159012
		1000.5	0.00160882
		1002	0.00162741
		1003.5	0.00164585
		1005	0.0016641
		1006.5	0.00168212
		1008	0.00169987
		1009.5	0.00171731
		1011	0.0017344
		1012.5	0.00175109
		1014	0.00176734
		1015.5	0.00178311
		1017	0.00179837
		1018.5	0.00181307
		1020	0.00182716
		1021.5	0.00184063
		1023	0.00185343
		1024.5	0.00186554
		1026	0.00187694
		1027.5	0.00188761
		1029	0.00189752
		1030.5	0.00190666
		1032	0.00191503
		1033.5	0.00192262
		1035	0.00192942
		1036.5	0.00193544
		1038	0.0019407
		1039.5	0.00194519
		1041	0.00194894
		1042.5	0.00195195
		1044	0.00195427
		1045.5	0.0019559
		1047	0.00195689
		1048.5	0.00195725
		1050	0.00195703
		1051.5	0.00195625
		1053	0.00195496
		1054.5	0.00195319
		1056	0.00195098
		1057.5	0.00194837
		1059	0.0019454
		1060.5	0.00194211
		1062	0.00193855
		1063.5	0.00193473
		1065	0.00193071
		1066.5	0.00192651
		1068	0.00192217
		1069.5	0.00191773
		1071	0.00191321
		1072.5	0.00190865
		1074	0.00190407
		1075.5	0.0018995
		1077	0.00189495
		1078.5	0.00189046
		1080	0.00188603
		1081.5	0.00188169
		1083	0.00187744
		1084.5	0.0018733
		1086	0.00186927
		1087.5	0.00186538
		1089	0.00186162
		1090.5	0.00185799
		1092	0.00185449
		1093.5	0.00185113
		1095	0.0018479
		1096.5	0.0018448
		1098	0.00184182
		1099.5	0.00183896
		1101	0.00183621
		1102.5	0.00183356
		1104	0.001831
		1105.5	0.00182852
		1107	0.00182611
		1108.5	0.00182376
		1110	0.00182145
		1111.5	0.00181916
		1113	0.00181689
		1114.5	0.00181461
		1116	0.00181232
		1117.5	0.00181
		1119	0.00180763
		1120.5	0.00180519
		1122	0.00180268
		1123.5	0.00180007
		1125	0.00179735
		1126.5	0.0017945
		1128	0.00179152
		1129.5	0.00178838
		1131	0.00178507
		1132.5	0.00178159
		1134	0.00177792
		1135.5	0.00177404
		1137	0.00176994
		1138.5	0.00176562
		1140	0.00176106
		1141.5	0.00175627
		1143	0.00175122
		1144.5	0.00174592
		1146	0.00174036
		1147.5	0.00173454
		1149	0.00172846
		1150.5	0.00172211
		1152	0.00171549
		1153.5	0.00170861
		1155	0.00170149
		1156.5	0.00169409
		1158	0.00168644
		1159.5	0.00167855
		1161	0.00167043
		1162.5	0.00166206
		1164	0.00165348
		1165.5	0.0016447
		1167	0.00163571
		1168.5	0.00162654
		1170	0.0016172
		1171.5	0.00160769
		1173	0.00159804
		1174.5	0.00158826
		1176	0.00157836
		1177.5	0.00156837
		1179	0.00155829
		1180.5	0.00154814
		1182	0.00153794
		1183.5	0.0015277
		1185	0.00151744
		1186.5	0.00150719
		1188	0.00149694
		1189.5	0.00148672
		1191	0.00147655
		1192.5	0.00146643
		1194	0.00145639
		1195.5	0.00144643
		1197	0.00143657
		1198.5	0.00142681
		1200	0.00141718
		1201.5	0.00140767
		1203	0.00139831
		1204.5	0.00138912
		1206	0.00138007
		1207.5	0.00137119
		1209	0.00136247
		1210.5	0.00135393
		1212	0.00134557
		1213.5	0.00133739
		1215	0.00132939
		1216.5	0.00132157
		1218	0.00131395
		1219.5	0.0013065
		1221	0.00129922
		1222.5	0.00129212
		1224	0.00128517
		1225.5	0.0012784
		1227	0.00127178
		1228.5	0.0012653
		1230	0.00125897
		1231.5	0.00125276
		1233	0.00124666
		1234.5	0.00124068
		1236	0.00123478
		1237.5	0.00122896
		1239	0.00122319
		1240.5	0.00121748
		1242	0.0012118
		1243.5	0.00120613
		1245	0.00120045
		1246.5	0.00119476
		1248	0.00118903
		1249.5	0.00118324
		1251	0.00117738
		1252.5	0.00117142
		1254	0.00116535
		1255.5	0.00115915
		1257	0.00115281
		1258.5	0.0011463
		1260	0.00113961
		1261.5	0.00113272
		1263	0.00112562
		1264.5	0.0011183
		1266	0.00111073
		1267.5	0.00110293
		1269	0.00109488
		1270.5	0.00108657
		1272	0.00107799
		1273.5	0.00106916
		1275	0.00106005
		1276.5	0.00105069
		1278	0.00104107
		1279.5	0.00103121
		1281	0.0010211
		1282.5	0.00101076
		1284	0.00100021
		1285.5	0.000989471
		1287	0.000978548
		1288.5	0.000967464
		1290	0.000956241
		1291.5	0.000944902
		1293	0.00093347
		1294.5	0.000921962
		1296	0.000910422
		1297.5	0.000898867
		1299	0.000887324
		1300.5	0.000875818
		1302	0.000864367
		1303.5	0.000853017
		1305	0.000841782
		1306.5	0.000830687
		1308	0.000819756
		1309.5	0.000809011
		1311	0.000798464
		1312.5	0.000788143
		1314	0.000778076
		1315.5	0.000768268
		1317	0.000758734
		1318.5	0.000749486
		1320	0.000740545
		1321.5	0.000731893
		1323	0.000723565
		1324.5	0.000715556
		1326	0.00070787
		1327.5	0.000700509
		1329	0.000693466
		1330.5	0.00068676
		1332	0.000680378
		1333.5	0.000674319
		1335	0.000668579
		1336.5	0.000663155
		1338	0.000658042
		1339.5	0.000653234
		1341	0.000648727
		1342.5	0.000644514
		1344	0.000640591
		1345.5	0.000636951
		1347	0.00063359
		1348.5	0.000630502
		1350	0.000627682
		1351.5	0.000625127
		1353	0.000622832
		1354.5	0.000620795
		1356	0.000619012
		1357.5	0.000617482
		1359	0.000616203
		1360.5	0.000615175
		1362	0.00061439
		1363.5	0.000613857
		1365	0.000613589
		1366.5	0.000613566
		1368	0.000613812
		1369.5	0.000614319
		1371	0.000615091
		1372.5	0.000616123
		1374	0.000617438
		1375.5	0.000619021
		1377	0.000620895
		1378.5	0.000623056
		1380	0.000625505
		1381.5	0.000628246
		1383	0.000631281
		1384.5	0.000634603
		1386	0.00063822
		1387.5	0.000642142
		1389	0.000646355
		1390.5	0.000650853
		1392	0.00065563
		1393.5	0.000660677
		1395	0.000665974
		1396.5	0.000671525
		1398	0.000677303
		1399.5	0.000683289
		1401	0.000689459
		1402.5	0.000695789
		1404	0.00070224
		1405.5	0.000708802
		1407	0.000715429
		1408.5	0.000722086
		1410	0.000728724
		1411.5	0.000735323
		1413	0.000741827
		1414.5	0.000748175
		1416	0.00075436
		1417.5	0.000760316
		1419	0.000765987
		1420.5	0.000771347
		1422	0.000776342
		1423.5	0.000780928
		1425	0.000785062
		1426.5	0.000788706
		1428	0.000791824
		1429.5	0.000794382
		1431	0.000796351
		1432.5	0.000797695
		1434	0.000798415
		1435.5	0.000798482
		1437	0.000797878
		1438.5	0.000796604
		1440	0.000794669
		1441.5	0.000792059
		1443	0.000788799
		1444.5	0.000784894
		1446	0.00078036
		1447.5	0.000775221
		1449	0.000769501
		1450.5	0.00076323
		1452	0.00075643
		1453.5	0.000749158
		1455	0.000741438
		1456.5	0.000733311
		1458	0.000724815
		1459.5	0.000715981
		1461	0.000706861
		1462.5	0.000697495
		1464	0.000687931
		1465.5	0.000678188
		1467	0.000668324
		1468.5	0.000658373
		1470	0.000648351
		1471.5	0.000638297
		1473	0.000628239
		1474.5	0.000618206
		1476	0.00060822
		1477.5	0.000598302
		1479	0.000588473
		1480.5	0.000578748
		1482	0.000569142
		1483.5	0.000559665
		1485	0.000550329
		1486.5	0.00054114
		1488	0.000532096
		1489.5	0.00052322
		1491	0.000514506
		1492.5	0.000505944
		1494	0.000497556
		1495.5	0.00048933
		1497	0.000481267
		1498.5	0.000473354
		1500	0.00046561
		1501.5	0.000458021
		1503	0.000450585
		1504.5	0.0004433
		1506	0.000436162
		1507.5	0.000429168
		1509	0.000422316
		1510.5	0.000415603
		1512	0.000409027
		1513.5	0.000402585
		1515	0.000396275
		1516.5	0.000390096
		1518	0.000384045
		1519.5	0.000378122
		1521	0.000372315
		1522.5	0.000366644
		1524	0.000361087
		1525.5	0.000355663
		1527	0.000350361
		1528.5	0.000345171
		1530	0.000340093
		1531.5	0.000335156
		1533	0.00033034
		1534.5	0.000325644
		1536	0.000321081
		1537.5	0.000316631
		1539	0.000312302
		1540.5	0.000308095
		1542	0.000304012
		1543.5	0.000300044
		1545	0.000296211
		1546.5	0.000292507
		1548	0.000288933
		1549.5	0.000285493
		1551	0.000282191
		1552.5	0.000279022
		1554	0.000276013
		1555.5	0.000273154
		1557	0.000270471
		1558.5	0.000267966
		1560	0.000265652
		1561.5	0.000263546
		1563	0.000261666
		1564.5	0.000260034
		1566	0.000258674
		1567.5	0.000257613
		1569	0.000256873
		1570.5	0.000256505
		1572	0.000256535
		1573.5	0.000257001
		1575	0.000257941
		1576.5	0.000259396
		1578	0.000261405
		1579.5	0.000263995
		1581	0.000267221
		1582.5	0.000271103
		1584	0.000275665
		1585.5	0.000280921
		1587	0.00028688
		1588.5	0.000293534
		1590	0.000300855
		1591.5	0.00030883
		1593	0.000317401
		1594.5	0.000326514
		1596	0.000336067
		1597.5	0.000345973
		1599	0.000356118
		1600.5	0.000366377
		1602	0.000376611
		1603.5	0.000386674
		1605	0.000396413
		1606.5	0.000405675
		1608	0.000414306
		1609.5	0.00042216
		1611	0.000429103
		1612.5	0.000435011
		1614	0.000439782
		1615.5	0.000443335
		1617	0.000445613
		1618.5	0.000446584
		1620	0.000446238
		1621.5	0.000444609
		1623	0.000441762
		1624.5	0.000437767
		1626	0.000432739
		1627.5	0.00042679
		1629	0.000420073
		1630.5	0.000412749
		1632	0.00040499
		1633.5	0.000396986
		1635	0.000388897
		1636.5	0.000380909
		1638	0.000373184
		1639.5	0.000365892
		1641	0.000359181
		1642.5	0.000353187
		1644	0.00034801
		1645.5	0.000343739
		1647	0.000340438
		1648.5	0.000338148
		1650	0.000336868
		1651.5	0.000336629
		1653	0.00033738
		1654.5	0.00033907
		1656	0.000341623
		1657.5	0.000344946
		1659	0.0003489
		1660.5	0.000353419
		1662	0.000358338
		1663.5	0.00036351
		1665	0.000368787
		1666.5	0.000374015
		1668	0.000379044
		1669.5	0.00038373
		1671	0.000387936
		1672.5	0.000391527
		1674	0.000394414
		1675.5	0.000396494
		1677	0.000397694
		1678.5	0.000397963
		1680	0.000397272
		1681.5	0.000395617
		1683	0.000393014
		1684.5	0.000389503
		1686	0.000385145
		1687.5	0.00038002
		1689	0.000374223
		1690.5	0.000367863
		1692	0.000361052
		1693.5	0.000353934
		1695	0.00034662
		1696.5	0.000339258
		1698	0.000331964
		1699.5	0.000324856
		1701	0.000318035
		1702.5	0.000311608
		1704	0.000305669
		1705.5	0.000300272
		1707	0.00029546
		1708.5	0.000291288
		1710	0.000287762
		1711.5	0.000284886
		1713	0.000282644
		1714.5	0.00028101
		1716	0.000279943
		1717.5	0.000279392
		1719	0.000279298
		1720.5	0.000279594
		1722	0.000280208
		1723.5	0.000281058
		1725	0.000282087
		1726.5	0.000283211
		1728	0.000284358
		1729.5	0.00028546
		1731	0.000286453
		1732.5	0.000287279
		1734	0.000287888
		1735.5	0.000288236
		1737	0.000288278
		1738.5	0.000288003
		1740	0.000287382
		1741.5	0.0002864
		1743	0.000285053
		1744.5	0.000283339
		1746	0.000281265
		1747.5	0.000278844
		1749	0.000276091
		1750.5	0.000273027
		1752	0.000269676
		1753.5	0.000266064
		1755	0.000262219
		1756.5	0.00025817
		1758	0.000253945
		1759.5	0.000249573
		1761	0.000245082
		1762.5	0.000240499
		1764	0.000235848
		1765.5	0.000231151
		1767	0.000226429
		1768.5	0.000221691
		1770	0.000216969
		1771.5	0.00021228
		1773	0.000207623
		1774.5	0.000202997
		1776	0.000198417
		1777.5	0.000193889
		1779	0.000189416
		1780.5	0.000185002
		1782	0.00018065
		1783.5	0.000176365
		1785	0.000172152
		1786.5	0.00016801
		1788	0.00016397
		1789.5	0.000160036
		1791	0.000156227
		1792.5	0.00015257
		1794	0.000149097
		1795.5	0.000145846
		1797	0.000142855
		1798.5	0.000140201
		1800	0.000137935
		1801.5	0.000136121
		1803	0.000134858
		1804.5	0.00013422
		1806	0.000134296
		1807.5	0.000135176
		1809	0.000136949
		1810.5	0.000139697
		1812	0.000143493
		1813.5	0.000148395
		1815	0.000154441
		1816.5	0.000161645
		1818	0.000169991
		1819.5	0.000179432
		1821	0.000189884
		1822.5	0.000201227
		1824	0.000213304
		1825.5	0.000225922
		1827	0.000238857
		1828.5	0.000251861
		1830	0.000264655
		1831.5	0.000276982
		1833	0.000288546
		1834.5	0.000299098
		1836	0.000308384
		1837.5	0.00031619
		1839	0.000322341
		1840.5	0.000326713
		1842	0.000329233
		1843.5	0.000329882
		1845	0.0003287
		1846.5	0.00032577
		1848	0.00032125
		1849.5	0.000315313
		1851	0.000308171
		1852.5	0.000300063
		1854	0.000291236
		1855.5	0.000281942
		1857	0.000272422
		1858.5	0.000262899
		1860	0.000253583
		1861.5	0.000244613
		1863	0.000236151
		1864.5	0.000228282
		1866	0.000221065
		1867.5	0.000214526
		1869	0.000208657
		1870.5	0.000203421
		1872	0.00019876
		1873.5	0.000194599
		1875	0.000190847
		1876.5	0.000187411
		1878	0.000184191
		1879.5	0.000181093
		1881	0.000178027
		1882.5	0.000174912
		1884	0.000171676
		1885.5	0.000168263
		1887	0.000164627
		1888.5	0.000160734
		1890	0.000156567
		1891.5	0.000152107
		1893	0.000147378
		1894.5	0.000142383
		1896	0.000137143
		1897.5	0.000131687
		1899	0.00012605
		1900.5	0.000120269
		1902	0.000114385
		1903.5	0.000108441
		1905	0.00010248
		1906.5	9.6544e-05
		1908	9.06749e-05
		1909.5	8.49115e-05
		1911	7.92901e-05
		1912.5	7.3844e-05
		1914	6.85962e-05
		1915.5	6.3579e-05
		1917	5.88249e-05
		1918.5	5.43425e-05
		1920	5.01468e-05
		1921.5	4.62392e-05
		1923	4.26479e-05
		1924.5	3.93673e-05
		1926	3.63899e-05
		1927.5	3.3735e-05
		1929	3.13882e-05
		1930.5	2.93447e-05
		1932	2.75976e-05
		1933.5	2.61388e-05
		1935	2.49593e-05
		1936.5	2.40491e-05
		1938	2.33977e-05
		1939.5	2.29943e-05
		1941	2.28279e-05
		1942.5	2.28877e-05
		1944	2.31628e-05
		1945.5	2.36426e-05
		1947	2.43169e-05
		1948.5	2.51759e-05
		1950	2.62099e-05
		1951.5	2.74099e-05
		1953	2.8767e-05
		1954.5	3.02729e-05
		1956	3.19192e-05
		1957.5	3.36982e-05
		1959	3.56019e-05
		1960.5	3.76227e-05
		1962	3.9753e-05
		1963.5	4.1985e-05
		1965	4.43111e-05
		1966.5	4.67233e-05
		1968	4.92135e-05
		1969.5	5.17733e-05
		1971	5.43942e-05
		1972.5	5.70672e-05
		1974	5.97733e-05
		1975.5	6.25229e-05
		1977	6.52957e-05
		1978.5	6.80816e-05
		1980	7.08699e-05
		1981.5	7.36498e-05
		1983	7.64102e-05
		1984.5	7.91399e-05
		1986	8.18273e-05
		1987.5	8.4461e-05
		1989	8.70195e-05
		1990.5	8.95135e-05
		1992	9.19187e-05
		1993.5	9.42241e-05
		1995	9.64189e-05
		1996.5	9.84926e-05
		1998	0.000100435
		1999.5	0.000102237
		2001	0.000103889
		2002.5	0.000105382
		2004	0.00010671
		2005.5	0.000107876
		2007	0.000108857
		2008.5	0.000109655
		2010	0.000110267
		2011.5	0.000110691
		2013	0.000110924
		2014.5	0.000110967
		2016	0.000110821
		2017.5	0.000110488
		2019	0.000109973
		2020.5	0.00010928
		2022	0.000108416
		2023.5	0.000107391
		2025	0.000106215
		2026.5	0.0001049
		2028	0.00010346
		2029.5	0.00010191
		2031	0.00010027
		2032.5	9.85587e-05
		2034	9.67993e-05
		2035.5	9.50163e-05
		2037	9.32365e-05
		2038.5	9.14795e-05
		2040	8.97871e-05
		2041.5	8.82021e-05
		2043	8.67498e-05
		2044.5	8.54675e-05
		2046	8.43936e-05
		2047.5	8.35676e-05
		2049	8.30296e-05
		2050.5	8.28191e-05
		2052	8.29752e-05
		2053.5	8.35348e-05
		2055	8.45323e-05
		2056.5	8.59986e-05
		2058	8.79597e-05
		2059.5	9.04357e-05
		2061	9.34399e-05
		2062.5	9.69775e-05
		2064	0.000101045
		2065.5	0.000105628
		2067	0.000110704
		2068.5	0.000116236
		2070	0.000122178
		2071.5	0.000128472
		2073	0.00013505
		2074.5	0.000141832
		2076	0.000148729
		2077.5	0.000155646
		2079	0.000162479
		2080.5	0.000169121
		2082	0.000175463
		2083.5	0.000181396
		2085	0.000186812
		2086.5	0.000191611
		2088	0.000195699
		2089.5	0.000198991
		2091	0.000201415
		2092.5	0.000202915
		2094	0.000203446
		2095.5	0.000202984
		2097	0.000201519
		2098.5	0.00019906
		2100	0.000195632
		2101.5	0.000191278
		2103	0.000186054
		2104.5	0.000180031
		2106	0.000173292
		2107.5	0.000165927
		2109	0.000158037
		2110.5	0.000149723
		2112	0.000141093
		2113.5	0.000132251
		2115	0.000123301
		2116.5	0.000114341
		2118	0.000105463
		2119.5	9.67522e-05
		2121	8.82838e-05
		2122.5	8.0123e-05
		2124	7.23251e-05
		2125.5	6.49344e-05
		2127	5.79847e-05
		2128.5	5.14997e-05
		2130	4.54935e-05
		2131.5	3.99712e-05
		2133	3.49301e-05
		2134.5	3.03605e-05
		2136	2.62468e-05
		2137.5	2.25687e-05
		2139	1.9302e-05
		2140.5	1.64198e-05
		2142	1.38936e-05
		2143.5	1.16935e-05
		2145	9.78975e-06
		2146.5	8.15282e-06
		2148	6.75414e-06
		2149.5	5.56644e-06
		2151	4.56411e-06
		2152.5	3.72339e-06
		2154	3.0225e-06
		2155.5	2.44169e-06
		2157	1.96325e-06
		2158.5	1.57148e-06
		2160	1.25256e-06
		2161.5	9.94443e-07
		2163	7.86742e-07
		2164.5	6.20555e-07
		2166	4.8833e-07
		2167.5	3.83704e-07
		2169	2.92434e-07
		2170.5	2.29464e-07
		2172	1.80506e-07
		2173.5	1.42634e-07
		2175	1.13479e-07
		2176.5	9.11337e-08
		2178	7.40769e-08
		2179.5	6.11007e-08
		2181	5.12546e-08
		2182.5	4.37949e-08
		2184	3.8144e-08
		2185.5	2.40815e-08
		2187	2.35759e-08
		2188.5	2.308e-08
		2190	2.25938e-08
		2191.5	2.21171e-08
		2193	2.16497e-08
		2194.5	2.11915e-08
		2196	2.07422e-08
		2197.5	2.03017e-08
		2199	1.98699e-08
		2200.5	1.94466e-08
		2202	1.90317e-08
		2203.5	1.86249e-08
		2205	1.82263e-08
		2206.5	1.78355e-08
		2208	1.74525e-08
		2209.5	1.70772e-08
		2211	1.67093e-08
		2212.5	1.63488e-08
		2214	1.59955e-08
		2215.5	1.56493e-08
		2217	1.53101e-08
		2218.5	1.49777e-08
		2220	1.4652e-08
		2221.5	1.43329e-08
		2223	1.40202e-08
		2224.5	1.37139e-08
		2226	1.34138e-08
		2227.5	1.31199e-08
		2229	1.28319e-08
		2230.5	1.25498e-08
		2232	1.22735e-08
		2233.5	1.20028e-08
		2235	1.17378e-08
		2236.5	1.14781e-08
		2238	1.12239e-08
		2239.5	1.09748e-08
		2241	1.0731e-08
		2242.5	1.04921e-08
		2244	1.02583e-08
		2245.5	1.00293e-08
		2247	0
		2248.5	0
		2250	0
		2251.5	0
		2253	0
		2254.5	0
		2256	0
		2257.5	0
		2259	0
		2260.5	0
		2262	0
		2263.5	0
		2265	0
		2266.5	0
		2268	0
		2269.5	0
		2271	0
		2272.5	0
		2274	0
		2275.5	0
		2277	0
		2278.5	0
		2280	0
		2281.5	0
		2283	0
		2284.5	0
		2286	0
		2287.5	0
		2289	0
		2290.5	0
		2292	0
		2293.5	0
		2295	0
		2296.5	0
		2298	0
		2299.5	0
		2301	0
		2302.5	0
		2304	0
		2305.5	0
		2307	0
		2308.5	0
		2310	0
		2311.5	0
		2313	0
		2314.5	0
		2316	0
		2317.5	0
		2319	0
		2320.5	0
		2322	0
		2323.5	0
		2325	0
		2326.5	0
		2328	0
		2329.5	0
		2331	0
		2332.5	0
		2334	0
		2335.5	0
		2337	0
		2338.5	0
		2340	0
		2341.5	0
		2343	0
		2344.5	0
		2346	0
		2347.5	0
		2349	0
		2350.5	0
		2352	0
		2353.5	0
		2355	0
		2356.5	0
		2358	0
		2359.5	0
		2361	0
		2362.5	0
		2364	0
		2365.5	0
		2367	0
		2368.5	0
		2370	0
		2371.5	0
		2373	0
		2374.5	0
		2376	0
		2377.5	0
		2379	0
		2380.5	0
		2382	0
		2383.5	0
		2385	0
		2386.5	0
		2388	0
		2389.5	0
		2391	0
		2392.5	0
		2394	0
		2395.5	0
		2397	0
		2398.5	0
		2400	0
		2401.5	0
		2403	0
		2404.5	0
		2406	0
		2407.5	0
		2409	0
		2410.5	0
		2412	0
		2413.5	0
		2415	0
		2416.5	0
		2418	0
		2419.5	0
		2421	0
		2422.5	0
		2424	0
		2425.5	0
		2427	0
		2428.5	0
		2430	0
		2431.5	0
		2433	0
		2434.5	0
		2436	0
		2437.5	0
		2439	0
		2440.5	0
		2442	0
		2443.5	0
		2445	0
		2446.5	0
		2448	0
		2449.5	0
		2451	0
		2452.5	0
		2454	0
		2455.5	0
		2457	0
		2458.5	0
		2460	0
		2461.5	0
		2463	0
		2464.5	0
		2466	0
		2467.5	0
		2469	0
		2470.5	0
		2472	0
		2473.5	0
		2475	0
		2476.5	0
		2478	0
		2479.5	0
		2481	0
		2482.5	0
		2484	0
		2485.5	0
		2487	0
		2488.5	0
		2490	0
		2491.5	0
		2493	0
		2494.5	0
		2496	0
		2497.5	0
		2499	0
		2500.5	0
		2502	0
		2503.5	0
		2505	0
		2506.5	0
		2508	0
		2509.5	0
		2511	0
		2512.5	0
		2514	0
		2515.5	0
		2517	0
		2518.5	0
		2520	0
		2521.5	0
		2523	0
		2524.5	0
		2526	0
		2527.5	0
		2529	0
		2530.5	1.26378e-08
		2532	1.6685e-08
		2533.5	2.19376e-08
		2535	2.87251e-08
		2536.5	3.74579e-08
		2538	4.86448e-08
		2539.5	6.29127e-08
		2541	8.10309e-08
		2542.5	1.03938e-07
		2544	1.32771e-07
		2545.5	1.68906e-07
		2547	2.13992e-07
		2548.5	2.69997e-07
		2550	3.39257e-07
		2551.5	4.24532e-07
		2553	5.29055e-07
		2554.5	6.56601e-07
		2556	8.11543e-07
		2557.5	9.98923e-07
		2559	1.22451e-06
		2560.5	1.49486e-06
		2562	1.8174e-06
		2563.5	2.20045e-06
		2565	2.65326e-06
		2566.5	3.1861e-06
		2568	3.8102e-06
		2569.5	4.53781e-06
		2571	5.38214e-06
		2572.5	6.35731e-06
		2574	7.47828e-06
		2575.5	8.76071e-06
		2577	1.02209e-05
		2578.5	1.18753e-05
		2580	1.37408e-05
		2581.5	1.5834e-05
		2583	1.81709e-05
		2584.5	2.0767e-05
		2586	2.36363e-05
		2587.5	2.67915e-05
		2589	3.02429e-05
		2590.5	3.39985e-05
		2592	3.80632e-05
		2593.5	4.24386e-05
		2595	4.71223e-05
		2596.5	5.21077e-05
		2598	5.73836e-05
		2599.5	6.29336e-05
		2601	6.87365e-05
		2602.5	7.47657e-05
		2604	8.09892e-05
		2605.5	8.73698e-05
		2607	9.38654e-05
		2608.5	0.000100429
		2610	0.00010701
		2611.5	0.000113553
		2613	0.00012
		2614.5	0.000126291
		2616	0.000132366
		2617.5	0.000138162
		2619	0.000143619
		2620.5	0.000148678
		2622	0.000153281
		2623.5	0.000157377
		2625	0.000160917
		2626.5	0.00016386
		2628	0.000166171
		2629.5	0.000167821
		2631	0.000168791
		2632.5	0.000169067
		2634	0.000168648
		2635.5	0.000167537
		2637	0.000165749
		2638.5	0.000163306
		2640	0.000160237
		2641.5	0.000156579
		2643	0.000152375
		2644.5	0.000147673
		2646	0.000142529
		2647.5	0.000136997
		2649	0.000131139
		2650.5	0.000125014
		2652	0.000118686
		2653.5	0.000112214
		2655	0.000105659
		2656.5	9.90772e-05
		2658	9.25234e-05
		2659.5	8.60478e-05
		2661	7.96962e-05
		2662.5	7.35098e-05
		2664	6.75247e-05
		2665.5	6.17717e-05
		2667	5.62764e-05
		2668.5	5.10591e-05
		2670	4.6135e-05
		2671.5	4.15142e-05
		2673	3.72026e-05
		2674.5	3.32016e-05
		2676	2.9509e-05
		2677.5	2.61193e-05
		2679	2.30238e-05
		2680.5	2.02117e-05
		2682	1.767e-05
		2683.5	1.53845e-05
		2685	1.33394e-05
		2686.5	1.15187e-05
		2688	9.9055e-06
		2689.5	8.48322e-06
		2691	7.23527e-06
		2692.5	6.14552e-06
		2694	5.19843e-06
		2695.5	4.39121e-06
		2697	3.69115e-06
		2698.5	3.0941e-06
		2700	2.58881e-06
		2701.5	2.16527e-06
		2703	1.81481e-06
		2704.5	1.53012e-06
		2706	1.3054e-06
		2707.5	1.13636e-06
		2709	1.0204e-06
		2710.5	9.56674e-07
		2712	9.46237e-07
		2713.5	9.92232e-07
		2715	1.10006e-06
		2716.5	1.2776e-06
		2718	1.53543e-06
		2719.5	1.88704e-06
		2721	2.3491e-06
		2722.5	2.94163e-06
		2724	3.69958e-06
		2725.5	4.6315e-06
		2727	5.77692e-06
		2728.5	7.17069e-06
		2730	8.85115e-06
		2731.5	1.08597e-05
		2733	1.32403e-05
		2734.5	1.60387e-05
		2736	1.92924e-05
		2737.5	2.30677e-05
		2739	2.7397e-05
		2740.5	3.23211e-05
		2742	3.78756e-05
		2743.5	4.40886e-05
		2745	5.09793e-05
		2746.5	5.85557e-05
		2748	6.68127e-05
		2749.5	7.57309e-05
		2751	8.52749e-05
		2752.5	9.53928e-05
		2754	0.000106016
		2755.5	0.000117057
		2757	0.000128417
		2758.5	0.000139978
		2760	0.000151612
		2761.5	0.000163183
		2763	0.000174548
		2764.5	0.000185561
		2766	0.000196081
		2767.5	0.000205973
		2769	0.000215112
		2770.5	0.00022339
		2772	0.000230717
		2773.5	0.000237025
		2775	0.000242272
		2776.5	0.000246439
		2778	0.000249536
		2779.5	0.000251597
		2781	0.000252682
		2782.5	0.00025287
		2784	0.000252259
		2785.5	0.000250962
		2787	0.000249101
		2788.5	0.000246801
		2790	0.000244189
		2791.5	0.000241384
		2793	0.000238497
		2794.5	0.000235625
		2796	0.000232847
		2797.5	0.000230225
		2799	0.000227799
		2800.5	0.000225587
		2802	0.000223587
		2803.5	0.000221779
		2805	0.000220122
		2806.5	0.000218563
		2808	0.000217037
		2809.5	0.000215469
		2811	0.000213781
		2812.5	0.000211893
		2814	0.000209728
		2815.5	0.000207215
		2817	0.000204291
		2818.5	0.000200905
		2820	0.000197017
		2821.5	0.000192602
		2823	0.000187649
		2824.5	0.000182163
		2826	0.00017616
		2827.5	0.000169674
		2829	0.000162746
		2830.5	0.00015543
		2832	0.000147787
		2833.5	0.000139886
		2835	0.000131798
		2836.5	0.000123598
		2838	0.00011536
		2839.5	0.000107156
		2841	9.90558e-05
		2842.5	9.11226e-05
		2844	8.3415e-05
		2845.5	7.59841e-05
		2847	6.88737e-05
		2848.5	6.21196e-05
		2850	5.57498e-05
		2851.5	4.97841e-05
		2853	4.42353e-05
		2854.5	3.91086e-05
		2856	3.44033e-05
		2857.5	3.01028e-05
		2859	2.62183e-05
		2860.5	2.27204e-05
		2862	1.95902e-05
		2863.5	1.68063e-05
		2865	1.43456e-05
		2866.5	1.21837e-05
		2868	1.02955e-05
		2869.5	8.65628e-06
		2871	7.24146e-06
		2872.5	6.02744e-06
		2874	4.99175e-06
		2875.5	4.11324e-06
		2877	3.37231e-06
		2878.5	2.75095e-06
		2880	2.2328e-06
		2881.5	1.80314e-06
		2883	1.44884e-06
		2884.5	1.15831e-06
		2886	9.21385e-07
		2887.5	7.29238e-07
		2889	5.74261e-07
		2890.5	4.49947e-07
		2892	3.50773e-07
		2893.5	2.72084e-07
		2895	2.09986e-07
		2896.5	1.61247e-07
		2898	1.23198e-07
		2899.5	9.36546e-08
		2901	7.0838e-08
		2902.5	5.33108e-08
		2904	3.99187e-08
		2905.5	2.97406e-08
		2907	2.20463e-08
		2908.5	1.62604e-08
		2910	1.19328e-08
		2911.5	0
		2913	0
		2914.5	0
		2916	0
		2917.5	0
		2919	0
		2920.5	0
		2922	0
		2923.5	0
		2925	0
		2926.5	0
		2928	0
		2929.5	0
		2931	0
		2932.5	0
		2934	0
		2935.5	0
		2937	0
		2938.5	0
		2940	0
		2941.5	0
		2943	0
		2944.5	0
		2946	0
		2947.5	0
		2949	0
		2950.5	0
		2952	0
		2953.5	0
		2955	0
		2956.5	0
		2958	0
		2959.5	0
		2961	0
		2962.5	0
		2964	0
		2965.5	0
		2967	0
		2968.5	0
		2970	0
		2971.5	0
		2973	0
		2974.5	0
		2976	0
		2977.5	0
		2979	0
		2980.5	0
		2982	0
		2983.5	0
		2985	0
		2986.5	0
		2988	0
		2989.5	0
		2991	0
		2992.5	0
		2994	0
		2995.5	0
		2997	0
		2998.5	0
[truncated: 1 more rows]

## Sheet: PlotDat7
Source sheet	Sheet1	0	2.99996e-08	350	0	0	0
Plot name	ProbDens5	1.6	3.04731e-08	400	0	3198.4	0
Plot Type	16	3.2	3.09534e-08	400	1
1st free col	9	4.8	3.14405e-08	350	1
Sigma Level	1	6.4	3.19345e-08	350	0
Absolute Errs	TRUE	8	3.24355e-08	ErrBox	ErrBox
Symbol Type	1	9.6	3.29436e-08	400	0
Inverse Plot	FALSE	11.2	3.3459e-08	450	0
Color Plot	TRUE	12.8	3.39816e-08	450	12
3D plot	FALSE	14.4	3.45116e-08	400	12
Linear	FALSE	16	3.5049e-08	400	0
Data Range	I2:J194	17.6	3.5594e-08	ErrBox	ErrBox
Filled Symbols	FALSE	19.2	3.61466e-08	450	0
ConcAge	FALSE	20.8	3.67069e-08	500	0
ConcSwap	FALSE	22.4	3.72751e-08	500	6
1st Symbol-row	1	24	3.78512e-08	450	6
		25.6	3.84354e-08	450	0
		27.2	3.90276e-08	ErrBox	ErrBox
		28.8	3.96281e-08	500	0
		30.4	4.02368e-08	550	0
		32	4.0854e-08	550	2
		33.6	4.14797e-08	500	2
		35.2	4.2114e-08	500	0
		36.8	4.2757e-08	ErrBox	ErrBox
		38.4	4.34088e-08	550	0
		40	4.40696e-08	600	0
		41.6	4.47394e-08	600	1
		43.2	4.54183e-08	550	1
		44.8	4.61065e-08	550	0
		46.4	4.6804e-08	ErrBox	ErrBox
		48	4.75109e-08	600	0
		49.6	4.82275e-08	650	0
		51.2	4.89537e-08	650	1
		52.8	4.96897e-08	600	1
		54.4	5.04356e-08	600	0
		56	5.11915e-08	ErrBox	ErrBox
		57.6	5.19576e-08	700	0
		59.2	5.27339e-08	750	0
		60.8	5.35205e-08	750	2
		62.4	5.43177e-08	700	2
		64	5.51254e-08	700	0
		65.6	5.59439e-08	ErrBox	ErrBox
		67.2	5.67732e-08	850	0
		68.8	5.76135e-08	900	0
		70.4	5.84649e-08	900	1
		72	5.93275e-08	850	1
		73.6	6.02015e-08	850	0
		75.2	6.10869e-08	ErrBox	ErrBox
		76.8	6.19839e-08	900	0
		78.4	6.28926e-08	950	0
		80	6.38132e-08	950	2
		81.6	6.47457e-08	900	2
		83.2	6.56904e-08	900	0
		84.8	6.66473e-08	ErrBox	ErrBox
		86.4	6.76166e-08	950	0
		88	6.85984e-08	1000	0
		89.6	6.95929e-08	1000	9
		91.2	7.06002e-08	950	9
		92.8	7.16204e-08	950	0
		94.4	7.26536e-08	ErrBox	ErrBox
		96	7.37001e-08	1000	0
		97.6	7.47599e-08	1050	0
		99.2	7.58333e-08	1050	22
		100.8	7.69202e-08	1000	22
		102.4	7.8021e-08	1000	0
		104	7.91356e-08	ErrBox	ErrBox
		105.6	8.02644e-08	1050	0
		107.2	8.14073e-08	1100	0
		108.8	8.25647e-08	1100	24
		110.4	8.37365e-08	1050	24
		112	8.49231e-08	1050	0
		113.6	8.61245e-08	ErrBox	ErrBox
		115.2	8.73408e-08	1100	0
		116.8	8.85723e-08	1150	0
		118.4	8.98191e-08	1150	10
		120	9.10814e-08	1100	10
		121.6	9.23592e-08	1100	0
		123.2	9.36528e-08	ErrBox	ErrBox
		124.8	9.49624e-08	1150	0
		126.4	9.6288e-08	1200	0
		128	9.76299e-08	1200	11
		129.6	9.89883e-08	1150	11
		131.2	1.00363e-07	1150	0
		132.8	1.01755e-07	ErrBox	ErrBox
		134.4	1.03163e-07	1200	0
		136	1.10014e-07	1250	0
		137.6	1.12029e-07	1250	11
		139.2	1.14117e-07	1200	11
		140.8	1.16285e-07	1200	0
		142.4	1.18538e-07	ErrBox	ErrBox
		144	1.20881e-07	1250	0
		145.6	1.23323e-07	1300	0
		147.2	1.25869e-07	1300	5
		148.8	1.28528e-07	1250	5
		150.4	1.31308e-07	1250	0
		152	1.34218e-07	ErrBox	ErrBox
		153.6	1.37268e-07	1300	0
		155.2	1.40468e-07	1350	0
		156.8	1.43829e-07	1350	4
		158.4	1.47363e-07	1300	4
		160	1.51083e-07	1300	0
		161.6	1.55003e-07	ErrBox	ErrBox
		163.2	1.59137e-07	1350	0
		164.8	1.63502e-07	1400	0
		166.4	1.68114e-07	1400	4
		168	1.7299e-07	1350	4
		169.6	1.78151e-07	1350	0
		171.2	1.83617e-07	ErrBox	ErrBox
		172.8	1.8941e-07	1400	0
		174.4	1.95552e-07	1450	0
		176	2.02069e-07	1450	12
		177.6	2.08988e-07	1400	12
		179.2	2.16335e-07	1400	0
		180.8	2.24142e-07	ErrBox	ErrBox
		182.4	2.32439e-07	1450	0
		184	2.4126e-07	1500	0
		185.6	2.5064e-07	1500	6
		187.2	2.60618e-07	1450	6
		188.8	2.71232e-07	1450	0
		190.4	2.82524e-07	ErrBox	ErrBox
		192	2.9454e-07	1500	0
		193.6	3.07326e-07	1550	0
		195.2	3.2093e-07	1550	3
		196.8	3.35405e-07	1500	3
		198.4	3.50806e-07	1500	0
		200	3.67189e-07	ErrBox	ErrBox
		201.6	3.84616e-07	1550	0
		203.2	4.03148e-07	1600	0
		204.8	4.22853e-07	1600	2
		206.4	4.438e-07	1550	2
		208	4.66061e-07	1550	0
		209.6	4.89712e-07	ErrBox	ErrBox
		211.2	5.14832e-07	1600	0
		212.8	5.41505e-07	1650	0
		214.4	5.69816e-07	1650	5
		216	5.99854e-07	1600	5
		217.6	6.31714e-07	1600	0
		219.2	6.65492e-07	ErrBox	ErrBox
		220.8	7.01288e-07	1650	0
		222.4	7.39206e-07	1700	0
		224	7.85157e-07	1700	10
		225.6	8.28341e-07	1650	10
		227.2	8.74059e-07	1650	0
		228.8	9.22439e-07	ErrBox	ErrBox
		230.4	9.73612e-07	1700	0
		232	1.02771e-06	1750	0
		233.6	1.09007e-06	1750	5
		235.2	1.15063e-06	1700	5
		236.8	1.21456e-06	1700	0
		238.4	1.28789e-06	ErrBox	ErrBox
		240	1.36543e-06	1750	0
		241.6	1.44232e-06	1800	0
		243.2	1.5235e-06	1800	4
		244.8	1.60917e-06	1750	4
		246.4	1.69955e-06	1750	0
		248	1.79487e-06	ErrBox	ErrBox
		249.6	1.90083e-06	1800	0
		251.2	2.01271e-06	1850	0
		252.8	2.12524e-06	1850	2
		254.4	2.2438e-06	1800	2
		256	2.36869e-06	1800	0
		257.6	2.50021e-06	ErrBox	ErrBox
		259.2	2.63866e-06	1850	0
		260.8	2.78962e-06	1900	0
		262.4	2.94368e-06	1900	5
		264	3.1058e-06	1850	5
		265.6	3.27637e-06	1850	0
		267.2	3.45579e-06	ErrBox	ErrBox
		268.8	3.6445e-06	1900	0
		270.4	3.84294e-06	1950	0
		272	4.05158e-06	1950	2
		273.6	4.27091e-06	1900	2
		275.2	4.50145e-06	1900	0
		276.8	4.74375e-06	ErrBox	ErrBox
		278.4	4.99837e-06	2000	0
		280	5.26593e-06	2050	0
		281.6	5.54704e-06	2050	1
		283.2	5.84237e-06	2000	1
		284.8	6.15263e-06	2000	0
		286.4	6.47853e-06	ErrBox	ErrBox
		288	6.82085e-06	2050	0
		289.6	7.1804e-06	2100	0
		291.2	7.55802e-06	2100	1
		292.8	7.96028e-06	2050	1
		294.4	8.37917e-06	2050	0
		296	8.81986e-06	ErrBox	ErrBox
		297.6	9.28373e-06	2150	0
		299.2	9.77229e-06	2200	0
		300.8	1.02924e-05	2200	1
		302.4	1.08364e-05	2150	1
		304	1.14109e-05	2150	0
		305.6	1.20187e-05	ErrBox	ErrBox
		307.2	1.26625e-05	2650	0
		308.8	1.33458e-05	2700	0
		310.4	1.40843e-05	2700	2
		312	1.48632e-05	2650	2
		313.6	1.57028e-05	2650	0
		315.2	1.6599e-05	ErrBox	ErrBox
		316.8	1.75707e-05	2700	0
		318.4	1.86235e-05	2750	0
		320	1.97665e-05	2750	2
		321.6	2.10068e-05	2700	2
		323.2	2.23635e-05	2700	0
		324.8	2.38525e-05	ErrBox	ErrBox
		326.4	2.54921e-05	2750	0
		328	2.73081e-05	2800	0
		329.6	2.93199e-05	2800	2
		331.2	3.15461e-05	2750	2
		332.8	3.40184e-05	2750	0
		334.4	3.67661e-05	ErrBox	ErrBox
		336	3.9826e-05
		337.6	4.32209e-05
		339.2	4.69897e-05
		340.8	5.11674e-05
		342.4	5.57897e-05
		344	6.0892e-05
		345.6	6.65092e-05
		347.2	7.26748e-05
		348.8	7.94284e-05
		350.4	8.67886e-05
		352	9.47876e-05
		353.6	0.00010345
		355.2	0.000112798
		356.8	0.000122849
		358.4	0.00013362
		360	0.000145125
		361.6	0.000157377
		363.2	0.000170387
		364.8	0.000184175
		366.4	0.000198744
		368	0.000214115
		369.6	0.000230309
		371.2	0.000247365
		372.8	0.000265294
		374.4	0.000284148
		376	0.000303958
		377.6	0.000324777
		379.2	0.000346654
		380.8	0.000369635
		382.4	0.000393767
		384	0.000419086
		385.6	0.000445615
		387.2	0.000473362
		388.8	0.00050231
		390.4	0.00053242
		392	0.00056362
		393.6	0.000595808
		395.2	0.000628847
		396.8	0.000662571
		398.4	0.000696777
		400	0.000731235
		401.6	0.000765686
		403.2	0.000799845
		404.8	0.0008334
		406.4	0.000866018
		408	0.000897343
		409.6	0.000927
		411.2	0.000954595
		412.8	0.000979722
		414.4	0.00100197
		416	0.00102095
		417.6	0.00103629
		419.2	0.00104765
		420.8	0.00105477
		422.4	0.00105749
		424	0.00105574
		425.6	0.00104959
		427.2	0.00103922
		428.8	0.00102495
		430.4	0.00100723
		432	0.000986597
		433.6	0.000963645
		435.2	0.000939027
		436.8	0.000913374
		438.4	0.0008873
		440	0.000861347
		441.6	0.000835975
		443.2	0.00081154
		444.8	0.000788301
		446.4	0.000766394
		448	0.000745881
		449.6	0.00072674
		451.2	0.000708889
		452.8	0.000692205
		454.4	0.000676544
		456	0.000661754
		457.6	0.000647687
		459.2	0.000634211
		460.8	0.000621213
		462.4	0.0006086
		464	0.000596303
		465.6	0.000584274
		467.2	0.000572474
		468.8	0.000560876
		470.4	0.000549465
		472	0.000538243
		473.6	0.000527199
		475.2	0.00051633
		476.8	0.00050563
		478.4	0.000495088
		480	0.00048471
		481.6	0.000474478
		483.2	0.00046438
		484.8	0.000454416
		486.4	0.000444572
		488	0.000434839
		489.6	0.000425214
		491.2	0.000415694
		492.8	0.000406279
		494.4	0.000396973
		496	0.000387788
		497.6	0.000378727
		499.2	0.00036981
		500.8	0.000361043
		502.4	0.000352448
		504	0.00034404
		505.6	0.00033585
		507.2	0.000327891
		508.8	0.000320183
		510.4	0.00031275
		512	0.000305595
		513.6	0.000298749
		515.2	0.000292218
		516.8	0.000286014
		518.4	0.000280143
		520	0.000274611
		521.6	0.000269425
		523.2	0.000264572
		524.8	0.000260054
		526.4	0.000255869
		528	0.000251996
		529.6	0.000248425
		531.2	0.000245149
		532.8	0.000242142
		534.4	0.000239397
		536	0.000236883
		537.6	0.000234588
		539.2	0.000232486
		540.8	0.000230555
		542.4	0.00022877
		544	0.00022711
		545.6	0.000225558
		547.2	0.000224079
		548.8	0.000222658
		550.4	0.000221272
		552	0.000219908
		553.6	0.000218531
		555.2	0.000217137
		556.8	0.000215704
		558.4	0.000214217
		560	0.000212668
		561.6	0.000211032
		563.2	0.000209306
		564.8	0.000207479
		566.4	0.000205545
		568	0.000203497
		569.6	0.000201336
		571.2	0.000199051
		572.8	0.000196645
		574.4	0.000194119
		576	0.000191475
		577.6	0.000188721
		579.2	0.000185854
		580.8	0.000182883
		582.4	0.000179815
		584	0.000176658
		585.6	0.000173422
		587.2	0.000170115
		588.8	0.000166742
		590.4	0.000163325
		592	0.000159868
		593.6	0.000156382
		595.2	0.000152878
		596.8	0.000149367
		598.4	0.000145858
		600	0.000142362
		601.6	0.000138894
		603.2	0.000135454
		604.8	0.00013206
		606.4	0.000128709
		608	0.000125422
		609.6	0.000122193
		611.2	0.000119033
		612.8	0.000115959
		614.4	0.000112955
		616	0.000110035
		617.6	0.000107199
		619.2	0.000104458
		620.8	0.00010181
		622.4	9.92558e-05
		624	9.6797e-05
		625.6	9.44346e-05
		627.2	9.21744e-05
		628.8	9.00069e-05
		630.4	8.79371e-05
		632	8.59654e-05
		633.6	8.40922e-05
		635.2	8.23125e-05
		636.8	8.06357e-05
		638.4	7.90571e-05
		640	7.75822e-05
		641.6	7.6207e-05
		643.2	7.49321e-05
		644.8	7.37643e-05
		646.4	7.26944e-05
		648	7.1724e-05
		649.6	7.08707e-05
		651.2	7.01217e-05
		652.8	6.94851e-05
		654.4	6.89581e-05
		656	6.85492e-05
		657.6	6.82619e-05
		659.2	6.80999e-05
		660.8	6.80671e-05
		662.4	6.81674e-05
		664	6.84048e-05
		665.6	6.87833e-05
		667.2	6.93068e-05
		668.8	6.99788e-05
		670.4	7.08082e-05
		672	7.17877e-05
		673.6	7.2925e-05
		675.2	7.42223e-05
		676.8	7.56811e-05
		678.4	7.73074e-05
		680	7.90965e-05
		681.6	8.10478e-05
		683.2	8.31595e-05
		684.8	8.54235e-05
		686.4	8.78466e-05
		688	9.04136e-05
		689.6	9.31188e-05
		691.2	9.59703e-05
		692.8	9.8955e-05
		694.4	0.000102047
		696	0.000105246
		697.6	0.00010854
		699.2	0.000111911
		700.8	0.000115354
		702.4	0.00011885
		704	0.000122386
		705.6	0.000125942
		707.2	0.000129494
		708.8	0.000133023
		710.4	0.000136532
		712	0.000139981
		713.6	0.00014335
		715.2	0.000146626
		716.8	0.000149789
		718.4	0.000152822
		720	0.000155706
		721.6	0.00015842
		723.2	0.000160954
		724.8	0.000163303
		726.4	0.000165438
		728	0.000167357
		729.6	0.000169042
		731.2	0.000170489
		732.8	0.000171692
		734.4	0.000172647
		736	0.000173358
		737.6	0.000173819
		739.2	0.000174029
		740.8	0.000173997
		742.4	0.000173729
		744	0.000173239
		745.6	0.000172528
		747.2	0.000171619
		748.8	0.000170516
		750.4	0.000169238
		752	0.000167804
		753.6	0.000166231
		755.2	0.000164544
		756.8	0.000162757
		758.4	0.000160891
		760	0.000158962
		761.6	0.000156995
		763.2	0.000155011
		764.8	0.000153036
		766.4	0.000151079
		768	0.000149166
		769.6	0.000147319
		771.2	0.000145551
		772.8	0.000143875
		774.4	0.000142315
		776	0.00014087
		777.6	0.000139568
		779.2	0.000138416
		780.8	0.000137424
		782.4	0.000136599
		784	0.000135961
		785.6	0.000135494
		787.2	0.000135218
		788.8	0.000135126
		790.4	0.000135226
		792	0.000135517
		793.6	0.000136
		795.2	0.000136675
		796.8	0.000137539
		798.4	0.000138589
		800	0.000139822
		801.6	0.00014124
		803.2	0.000142833
		804.8	0.000144592
		806.4	0.000146517
		808	0.000148601
		809.6	0.000150841
		811.2	0.00015323
		812.8	0.000155763
		814.4	0.000158429
		816	0.000161235
		817.6	0.00016417
		819.2	0.000167227
		820.8	0.000170404
		822.4	0.000173696
		824	0.000177098
		825.6	0.000180606
		827.2	0.000184219
		828.8	0.000187932
		830.4	0.000191748
		832	0.00019566
		833.6	0.00019966
		835.2	0.000203752
		836.8	0.00020794
		838.4	0.000212212
		840	0.000216573
		841.6	0.000221028
		843.2	0.000225566
		844.8	0.000230197
		846.4	0.000234913
		848	0.000239719
		849.6	0.000244616
		851.2	0.00024961
		852.8	0.000254694
		854.4	0.000259873
		856	0.000265157
		857.6	0.000270536
		859.2	0.000276019
		860.8	0.000281613
		862.4	0.000287311
		864	0.000293123
		865.6	0.000299055
		867.2	0.000305102
		868.8	0.000311278
		870.4	0.000317576
		872	0.00032401
		873.6	0.000330568
		875.2	0.000337266
		876.8	0.000344111
		878.4	0.000351101
		880	0.00035824
		881.6	0.000365538
		883.2	0.000372985
		884.8	0.000380597
		886.4	0.000388364
		888	0.000396295
		889.6	0.000404392
		891.2	0.000412655
		892.8	0.000421086
		894.4	0.000429685
		896	0.000438452
		897.6	0.000447392
		899.2	0.000456492
		900.8	0.000465756
		902.4	0.000475182
		904	0.000484765
		905.6	0.000494508
		907.2	0.000504394
		908.8	0.000514425
		910.4	0.000524592
		912	0.000534891
		913.6	0.000545318
		915.2	0.000555856
		916.8	0.000566501
		918.4	0.00057725
		920	0.000588083
		921.6	0.000598995
		923.2	0.000609978
		924.8	0.00062102
		926.4	0.000632113
		928	0.000643246
		929.6	0.00065441
		931.2	0.000665594
		932.8	0.00067679
		934.4	0.000687989
		936	0.000699189
		937.6	0.000710376
		939.2	0.000721538
		940.8	0.000732673
		942.4	0.000743776
		944	0.000754847
		945.6	0.000765872
		947.2	0.000776853
		948.8	0.000787787
		950.4	0.000798672
		952	0.000809509
		953.6	0.000820298
		955.2	0.000831039
		956.8	0.000841736
		958.4	0.000852389
		960	0.000863003
		961.6	0.000873582
		963.2	0.000884131
		964.8	0.000894659
		966.4	0.000905171
		968	0.000915666
		969.6	0.000926166
		971.2	0.000936667
		972.8	0.000947174
		974.4	0.000957705
		976	0.00096827
		977.6	0.000978884
		979.2	0.000989562
		980.8	0.00100033
		982.4	0.00101121
		984	0.00102222
		985.6	0.0010334
		987.2	0.00104479
		988.8	0.00105646
		990.4	0.00106843
		992	0.00108079
		993.6	0.00109359
		995.2	0.00110693
		996.8	0.00112088
		998.4	0.00113551
		1000	0.0011509
		1001.6	0.00116711
		1003.2	0.00118419
		1004.8	0.00120216
		1006.4	0.001221
		1008	0.00124067
		1009.6	0.00126108
		1011.2	0.0012821
		1012.8	0.00130355
		1014.4	0.00132522
		1016	0.00134684
		1017.6	0.00136813
		1019.2	0.0013888
		1020.8	0.00140853
		1022.4	0.00142706
		1024	0.00144412
		1025.6	0.0014595
		1027.2	0.00147302
		1028.8	0.00148462
		1030.4	0.00149425
		1032	0.00150197
		1033.6	0.00150789
		1035.2	0.0015122
		1036.8	0.0015151
		1038.4	0.00151686
		1040	0.00151775
		1041.6	0.00151804
		1043.2	0.001518
		1044.8	0.00151788
		1046.4	0.00151787
		1048	0.00151814
		1049.6	0.00151883
		1051.2	0.00152001
		1052.8	0.00152171
		1054.4	0.00152393
		1056	0.00152665
		1057.6	0.00152981
		1059.2	0.00153333
		1060.8	0.00153712
		1062.4	0.0015411
		1064	0.00154517
		1065.6	0.00154923
		1067.2	0.0015532
		1068.8	0.00155699
		1070.4	0.00156054
		1072	0.00156378
		1073.6	0.00156664
		1075.2	0.00156909
		1076.8	0.00157109
		1078.4	0.00157258
		1080	0.00157356
		1081.6	0.00157398
		1083.2	0.00157382
		1084.8	0.00157307
		1086.4	0.00157171
		1088	0.00156973
		1089.6	0.00156714
		1091.2	0.00156391
		1092.8	0.00156006
		1094.4	0.00155559
		1096	0.0015505
		1097.6	0.00154482
		1099.2	0.00153855
		1100.8	0.00153171
		1102.4	0.00152433
		1104	0.00151643
		1105.6	0.00150805
		1107.2	0.00149921
		1108.8	0.00148997
		1110.4	0.00148034
		1112	0.00147039
		1113.6	0.00146014
		1115.2	0.00144965
		1116.8	0.00143896
		1118.4	0.00142812
		1120	0.00141717
		1121.6	0.00140617
		1123.2	0.00139515
		1124.8	0.00138417
		1126.4	0.00137327
		1128	0.00136249
		1129.6	0.00135188
		1131.2	0.00134148
		1132.8	0.00133131
		1134.4	0.00132143
		1136	0.00131187
		1137.6	0.00130265
		1139.2	0.00129381
		1140.8	0.00128538
		1142.4	0.00127738
		1144	0.00126985
		1145.6	0.00126278
		1147.2	0.00125621
		1148.8	0.00125016
		1150.4	0.00124462
		1152	0.0012396
		1153.6	0.00123511
		1155.2	0.00123114
		1156.8	0.00122768
		1158.4	0.00122472
		1160	0.00122225
		1161.6	0.00122021
		1163.2	0.00121858
		1164.8	0.00121732
		1166.4	0.00121639
		1168	0.00121572
		1169.6	0.00121526
		1171.2	0.00121493
		1172.8	0.00121467
		1174.4	0.00121441
		1176	0.00121408
		1177.6	0.00121359
		1179.2	0.00121287
		1180.8	0.00121185
		1182.4	0.00121046
		1184	0.00120864
		1185.6	0.00120634
		1187.2	0.0012035
		1188.8	0.00120008
		1190.4	0.00119607
		1192	0.00119144
		1193.6	0.00118618
		1195.2	0.0011803
		1196.8	0.0011738
		1198.4	0.00116672
		1200	0.00115908
		1201.6	0.00115092
		1203.2	0.0011423
		1204.8	0.00113325
		1206.4	0.00112383
		1208	0.00111411
		1209.6	0.00110413
		1211.2	0.00109396
		1212.8	0.00108365
		1214.4	0.00107325
		1216	0.00106281
		1217.6	0.00105238
		1219.2	0.00104198
		1220.8	0.00103167
		1222.4	0.00102146
		1224	0.00101137
		1225.6	0.00100143
		1227.2	0.000991639
		1228.8	0.000982014
		1230.4	0.000972557
		1232	0.000963267
		1233.6	0.000954141
		1235.2	0.000945174
		1236.8	0.00093636
		1238.4	0.000927691
		1240	0.000919158
		1241.6	0.000910753
		1243.2	0.000902467
		1244.8	0.000894291
		1246.4	0.000886219
		1248	0.000878243
		1249.6	0.000870358
		1251.2	0.00086256
		1252.8	0.000854838
		1254.4	0.000847202
		1256	0.000839645
		1257.6	0.000832159
		1259.2	0.000824758
		1260.8	0.000817435
		1262.4	0.000810197
		1264	0.000803029
		1265.6	0.000795962
		1267.2	0.00078898
		1268.8	0.00078209
		1270.4	0.000775297
		1272	0.000768601
		1273.6	0.00076202
		1275.2	0.000755544
		1276.8	0.000749188
		1278.4	0.000742946
		1280	0.000736822
		1281.6	0.000730825
		1283.2	0.000724961
		1284.8	0.000719239
		1286.4	0.000713657
		1288	0.000708225
		1289.6	0.000702929
		1291.2	0.000697789
		1292.8	0.000692803
		1294.4	0.000687974
		1296	0.000683303
		1297.6	0.000678793
		1299.2	0.000674446
		1300.8	0.000670258
		1302.4	0.000666241
		1304	0.000662395
		1305.6	0.00065871
		1307.2	0.000655181
		1308.8	0.000651829
		1310.4	0.000648636
		1312	0.000645612
		1313.6	0.000642749
		1315.2	0.000640045
		1316.8	0.000637498
		1318.4	0.000635104
		1320	0.000632861
		1321.6	0.000630766
		1323.2	0.000628815
		1324.8	0.000627003
		1326.4	0.000625326
		1328	0.000623787
		1329.6	0.00062237
		1331.2	0.000621078
		1332.8	0.000619905
		1334.4	0.000618848
		1336	0.000617903
		1337.6	0.000617069
		1339.2	0.000616336
		1340.8	0.000615713
		1342.4	0.000615188
		1344	0.000614769
		1345.6	0.000614452
		1347.2	0.000614235
		1348.8	0.000614119
		1350.4	0.000614105
		1352	0.000614195
		1353.6	0.000614392
		1355.2	0.000614703
		1356.8	0.000615123
		1358.4	0.000615659
		1360	0.000616317
		1361.6	0.000617099
		1363.2	0.000618012
		1364.8	0.000619059
		1366.4	0.000620246
		1368	0.000621571
		1369.6	0.000623045
		1371.2	0.000624676
		1372.8	0.000626456
		1374.4	0.000628397
		1376	0.000630497
		1377.6	0.000632752
		1379.2	0.000635167
		1380.8	0.000637745
		1382.4	0.000640477
		1384	0.000643361
		1385.6	0.000646392
		1387.2	0.000649566
		1388.8	0.000652874
		1390.4	0.000656322
		1392	0.000659901
		1393.6	0.000663611
		1395.2	0.000667446
		1396.8	0.000671422
		1398.4	0.000675542
		1400	0.00067982
		1401.6	0.000684266
		1403.2	0.000688923
		1404.8	0.000693823
		1406.4	0.000698999
		1408	0.000704486
		1409.6	0.000710352
		1411.2	0.000716636
		1412.8	0.000723382
		1414.4	0.000730635
		1416	0.00073841
		1417.6	0.000746715
		1419.2	0.000755546
		1420.8	0.000764849
		1422.4	0.000774557
		1424	0.000784547
		1425.6	0.00079468
		1427.2	0.00080476
		1428.8	0.000814579
		1430.4	0.000823885
		1432	0.000832427
		1433.6	0.000839937
		1435.2	0.000846155
		1436.8	0.000850844
		1438.4	0.0008538
		1440	0.000854862
		1441.6	0.000853925
		1443.2	0.000850944
		1444.8	0.000845938
		1446.4	0.00083899
		1448	0.000830239
		1449.6	0.000819879
		1451.2	0.000808142
		1452.8	0.000795282
		1454.4	0.000781586
		1456	0.000767317
		1457.6	0.000752754
		1459.2	0.000738135
		1460.8	0.000723675
		1462.4	0.000709553
		1464	0.00069591
		1465.6	0.000682848
		1467.2	0.000670432
		1468.8	0.000658689
		1470.4	0.000647626
		1472	0.000637223
		1473.6	0.000627445
		1475.2	0.000618234
		1476.8	0.00060954
		1478.4	0.000601298
		1480	0.000593443
		1481.6	0.000585937
		1483.2	0.000578711
		1484.8	0.000571727
		1486.4	0.000564941
		1488	0.000558331
		1489.6	0.000551865
		1491.2	0.000545519
		1492.8	0.000539287
		1494.4	0.000533147
		1496	0.000527102
		1497.6	0.000521141
		1499.2	0.000515258
		1500.8	0.000509455
		1502.4	0.000503738
		1504	0.000498105
		1505.6	0.000492566
		1507.2	0.000487112
		1508.8	0.000481745
		1510.4	0.000476482
		1512	0.00047134
		1513.6	0.000466307
		1515.2	0.000461404
		1516.8	0.000456653
		1518.4	0.000452053
		1520	0.000447627
		1521.6	0.000443386
		1523.2	0.000439343
		1524.8	0.000435525
		1526.4	0.000431951
		1528	0.000428624
		1529.6	0.000425573
		1531.2	0.00042282
		1532.8	0.000420376
		1534.4	0.000418256
		1536	0.00041647
		1537.6	0.000415028
		1539.2	0.000413939
		1540.8	0.000413193
		1542.4	0.000412788
		1544	0.00041271
		1545.6	0.000412946
		1547.2	0.000413473
		1548.8	0.000414266
		1550.4	0.000415285
		1552	0.000416486
		1553.6	0.000417837
		1555.2	0.000419275
		1556.8	0.000420751
		1558.4	0.000422212
		1560	0.000423613
		1561.6	0.000424879
		1563.2	0.000425978
		1564.8	0.000426855
		1566.4	0.000427477
		1568	0.000427807
		1569.6	0.000427819
		1571.2	0.000427492
		1572.8	0.000426828
		1574.4	0.000425826
		1576	0.000424499
		1577.6	0.00042287
		1579.2	0.000420973
		1580.8	0.000418847
		1582.4	0.000416543
		1584	0.000414115
		1585.6	0.000411622
		1587.2	0.000409127
		1588.8	0.000406697
		1590.4	0.00040439
		1592	0.000402275
		1593.6	0.000400423
		1595.2	0.000398876
		1596.8	0.00039769
		1598.4	0.000396905
		1600	0.000396567
		1601.6	0.000396712
		1603.2	0.000397356
		1604.8	0.000398529
		1606.4	0.000400236
		1608	0.00040248
		1609.6	0.000405269
		1611.2	0.000408594
		1612.8	0.00041244
		1614.4	0.000416806
		1616	0.000421666
		1617.6	0.000427014
		1619.2	0.000432825
		1620.8	0.000439081
		1622.4	0.000445764
		1624	0.00045285
		1625.6	0.000460333
		1627.2	0.000468191
		1628.8	0.000476412
		1630.4	0.000484981
		1632	0.000493888
		1633.6	0.000503121
		1635.2	0.000512667
		1636.8	0.000522526
		1638.4	0.00053269
		1640	0.000543137
		1641.6	0.000553858
		1643.2	0.000564839
		1644.8	0.000576059
		1646.4	0.000587495
		1648	0.000599118
		1649.6	0.000610892
		1651.2	0.000622776
		1652.8	0.000634719
		1654.4	0.000646664
		1656	0.000658536
		1657.6	0.000670283
		1659.2	0.000681815
		1660.8	0.000693043
		1662.4	0.000703877
		1664	0.000714221
		1665.6	0.000723972
		1667.2	0.000733042
		1668.8	0.000741335
		1670.4	0.000748747
		1672	0.000755198
		1673.6	0.000760609
		1675.2	0.000764914
		1676.8	0.000768055
		1678.4	0.000769996
		1680	0.000770727
		1681.6	0.000770211
		1683.2	0.000768485
		1684.8	0.000765565
		1686.4	0.000761494
		1688	0.000756324
		1689.6	0.000750141
		1691.2	0.000743022
		1692.8	0.000735066
		1694.4	0.000726374
		1696	0.000717064
		1697.6	0.000707234
		1699.2	0.000697012
		1700.8	0.000686503
		1702.4	0.000675827
		1704	0.000665086
		1705.6	0.000654379
		1707.2	0.000643788
		1708.8	0.000633418
		1710.4	0.000623335
		1712	0.000613602
		1713.6	0.000604279
		1715.2	0.000595412
		1716.8	0.000587041
		1718.4	0.000579198
		1720	0.000571911
		1721.6	0.000565194
		1723.2	0.000559072
		1724.8	0.000553554
		1726.4	0.000548671
		1728	0.000544489
		1729.6	0.000541115
		1731.2	0.000538718
		1732.8	0.000537603
		1734.4	0.000538215
		1736	0.000541168
		1737.6	0.000547248
		1739.2	0.000557311
		1740.8	0.000572163
		1742.4	0.000592331
		1744	0.000617802
		1745.6	0.000647776
		1747.2	0.000680508
		1748.8	0.000713341
		1750.4	0.000742959
		1752	0.00076586
		1753.6	0.000778973
		1755.2	0.000780222
		1756.8	0.000768976
		1758.4	0.000746145
		1760	0.000713999
		1761.6	0.000675692
		1763.2	0.000634656
		1764.8	0.000594023
		1766.4	0.000556196
		1768	0.000522659
		1769.6	0.000493988
		1771.2	0.000470056
		1772.8	0.000450276
		1774.4	0.000433848
		1776	0.000419975
		1777.6	0.00040798
		1779.2	0.000397356
		1780.8	0.000387764
		1782.4	0.000379022
		1784	0.000371028
		1785.6	0.000363767
		1787.2	0.000357225
		1788.8	0.000351464
		1790.4	0.000346483
		1792	0.000342295
		1793.6	0.000338907
		1795.2	0.000336304
		1796.8	0.000334462
		1798.4	0.000333344
		1800	0.000332897
		1801.6	0.000333073
		1803.2	0.000333801
		1804.8	0.00033501
		1806.4	0.00033662
		1808	0.000338562
		1809.6	0.000340752
		1811.2	0.000343104
		1812.8	0.000345558
		1814.4	0.000348043
		1816	0.000350486
		1817.6	0.000352831
		1819.2	0.000355023
		1820.8	0.000357013
		1822.4	0.000358772
		1824	0.000360282
		1825.6	0.000361507
		1827.2	0.000362442
		1828.8	0.000363084
		1830.4	0.000363438
		1832	0.000363521
		1833.6	0.000363342
		1835.2	0.000362928
		1836.8	0.000362306
		1838.4	0.000361499
		1840	0.000360554
		1841.6	0.000359488
		1843.2	0.000358335
		1844.8	0.000357123
		1846.4	0.000355877
		1848	0.000354614
		1849.6	0.000353362
		1851.2	0.00035213
		1852.8	0.000350929
		1854.4	0.000349762
		1856	0.000348643
		1857.6	0.000347587
		1859.2	0.000346584
		1860.8	0.000345683
		1862.4	0.000344887
		1864	0.000344241
		1865.6	0.000343789
		1867.2	0.000343589
		1868.8	0.000343716
		1870.4	0.000344252
		1872	0.000345289
		1873.6	0.000346921
		1875.2	0.000349237
		1876.8	0.000352312
		1878.4	0.000356197
		1880	0.000360911
		1881.6	0.000366429
		1883.2	0.000372674
		1884.8	0.000379515
		1886.4	0.000386754
		1888	0.000394149
		1889.6	0.000401412
		1891.2	0.000408206
		1892.8	0.000414181
		1894.4	0.000418987
		1896	0.000422297
		1897.6	0.000423822
		1899.2	0.000423339
		1900.8	0.000420695
		1902.4	0.000415826
		1904	0.000408753
		1905.6	0.000399587
		1907.2	0.00038851
		1908.8	0.000375771
		1910.4	0.000361664
		1912	0.000346507
		1913.6	0.00033063
		1915.2	0.000314347
		1916.8	0.000297951
		1918.4	0.000281697
		1920	0.000265799
		1921.6	0.000250422
		1923.2	0.00023569
		1924.8	0.000221678
		1926.4	0.000208444
		1928	0.000196001
		1929.6	0.000184345
		1931.2	0.000173461
		1932.8	0.000163323
		1934.4	0.000153903
		1936	0.000145172
		1937.6	0.000137101
		1939.2	0.000129661
		1940.8	0.000122837
		1942.4	0.000116602
		1944	0.00011093
		1945.6	0.000105804
		1947.2	0.000101209
		1948.8	9.71132e-05
		1950.4	9.3487e-05
		1952	9.03131e-05
		1953.6	8.75568e-05
		1955.2	8.51869e-05
		1956.8	8.31665e-05
		1958.4	8.14734e-05
		1960	8.00698e-05
		1961.6	7.89196e-05
		1963.2	7.80018e-05
		1964.8	7.72804e-05
		1966.4	7.67279e-05
		1968	7.63137e-05
		1969.6	7.60243e-05
		1971.2	7.58236e-05
		1972.8	7.57127e-05
		1974.4	7.56573e-05
		1976	7.56533e-05
		1977.6	7.56805e-05
		1979.2	7.57219e-05
		1980.8	7.57771e-05
		1982.4	7.58314e-05
		1984	7.58715e-05
		1985.6	7.59006e-05
		1987.2	7.59068e-05
		1988.8	7.58846e-05
		1990.4	7.5829e-05
		1992	7.57357e-05
		1993.6	7.56009e-05
		1995.2	7.54212e-05
		1996.8	7.51939e-05
		1998.4	7.49165e-05
		2000	7.45779e-05
		2001.6	7.41966e-05
		2003.2	7.37548e-05
		2004.8	7.32618e-05
		2006.4	7.27117e-05
		2008	7.21043e-05
		2009.6	7.14397e-05
		2011.2	7.07182e-05
		2012.8	6.99407e-05
		2014.4	6.9108e-05
		2016	6.82214e-05
		2017.6	6.72824e-05
		2019.2	6.62928e-05
		2020.8	6.52547e-05
		2022.4	6.41702e-05
		2024	6.30418e-05
		2025.6	6.18722e-05
		2027.2	6.06594e-05
		2028.8	5.94163e-05
		2030.4	5.81407e-05
		2032	5.6836e-05
		2033.6	5.55053e-05
		2035.2	5.41521e-05
		2036.8	5.27797e-05
		2038.4	5.13916e-05
		2040	4.99911e-05
		2041.6	4.85816e-05
		2043.2	4.71665e-05
		2044.8	4.57492e-05
		2046.4	4.43328e-05
		2048	4.29204e-05
		2049.6	4.15151e-05
		2051.2	4.01148e-05
		2052.8	3.87324e-05
		2054.4	3.73655e-05
		2056	3.60164e-05
		2057.6	3.46876e-05
		2059.2	3.33811e-05
		2060.8	3.20941e-05
		2062.4	3.08386e-05
		2064	2.96109e-05
		2065.6	2.84123e-05
		2067.2	2.72442e-05
		2068.8	2.61077e-05
		2070.4	2.50127e-05
		2072	2.39655e-05
		2073.6	2.30043e-05
		2075.2	2.22251e-05
		2076.8	2.18606e-05
		2078.4	2.24195e-05
		2080	2.4894e-05
		2081.6	3.09894e-05
		2083.2	4.32399e-05
		2084.8	6.47771e-05
		2086.4	9.85175e-05
		2088	0.000145729
		2089.6	0.000204393
		2091.2	0.00026812
		2092.8	0.000326654
		2094.4	0.000368286
		2096	0.000383576
		2097.6	0.000368769
		2099.2	0.000327244
		2100.8	0.000268206
		2102.4	0.000203341
		2104	0.000143064
		2105.6	9.39918e-05
		2107.2	5.83746e-05
		2108.8	3.50766e-05
		2110.4	2.12289e-05
		2112	1.36841e-05
		2113.6	9.86578e-06
		2115.2	8.02518e-06
		2116.8	7.13889e-06
		2118.4	6.68046e-06
		2120	6.41027e-06
		2121.6	6.23283e-06
		2123.2	6.11477e-06
		2124.8	6.05869e-06
		2126.4	6.06551e-06
		2128	6.1483e-06
		2129.6	6.32295e-06
		2131.2	6.6084e-06
		2132.8	7.02686e-06
		2134.4	7.60389e-06
		2136	8.36838e-06
		2137.6	9.35229e-06
		2139.2	1.05903e-05
		2140.8	1.21189e-05
		2142.4	1.39757e-05
		2144	1.61982e-05
		2145.6	1.88218e-05
		2147.2	2.18783e-05
		2148.8	2.53939e-05
		2150.4	2.9387e-05
		2152	3.38656e-05
		2153.6	3.88255e-05
		2155.2	4.42481e-05
		2156.8	5.00988e-05
		2158.4	5.63258e-05
		2160	6.28596e-05
		2161.6	6.96133e-05
		2163.2	7.64839e-05
		2164.8	8.33537e-05
		2166.4	9.00938e-05
		2168	9.65674e-05
		2169.6	0.000102634
		2171.2	0.000108156
		2172.8	0.000113001
		2174.4	0.000117047
		2176	0.000120193
		2177.6	0.000122354
		2179.2	0.000123474
		2180.8	0.00012352
		2182.4	0.000122491
		2184	0.000120411
		2185.6	0.000117335
		2187.2	0.000113336
		2188.8	0.000108519
		2190.4	0.000103006
		2192	9.69226e-05
		2193.6	9.0406e-05
		2195.2	8.35964e-05
		2196.8	7.66314e-05
		2198.4	6.96415e-05
		2200	6.27465e-05
		2201.6	5.60521e-05
		2203.2	4.9648e-05
		2204.8	4.36068e-05
		2206.4	3.79832e-05
		2208	3.28145e-05
		2209.6	2.81221e-05
		2211.2	2.39122e-05
		2212.8	2.01787e-05
		2214.4	1.69045e-05
		2216	1.40645e-05
		2217.6	1.16273e-05
		2219.2	9.55758e-06
		2220.8	7.81776e-06
		2222.4	6.36978e-06
		2224	5.17634e-06
		2225.6	4.2019e-06
		2227.2	3.41345e-06
		2228.8	2.78099e-06
		2230.4	2.27777e-06
		2232	1.88036e-06
		2233.6	1.5686e-06
		2235.2	1.32539e-06
		2236.8	1.13645e-06
		2238.4	9.90038e-07
		2240	8.76599e-07
		2241.6	7.88483e-07
		2243.2	7.19636e-07
		2244.8	6.65324e-07
		2246.4	6.21894e-07
		2248	5.86554e-07
		2249.6	5.57201e-07
		2251.2	5.32263e-07
		2252.8	5.10581e-07
		2254.4	4.91306e-07
		2256	4.73826e-07
		2257.6	4.54036e-07
		2259.2	4.40244e-07
		2260.8	4.26832e-07
		2262.4	4.13791e-07
		2264	4.0111e-07
		2265.6	3.88781e-07
		2267.2	3.76795e-07
		2268.8	3.65144e-07
		2270.4	3.48713e-07
		2272	3.38062e-07
		2273.6	3.27699e-07
		2275.2	3.17616e-07
		2276.8	3.07807e-07
		2278.4	2.98267e-07
		2280	2.88989e-07
		2281.6	2.79967e-07
		2283.2	2.71195e-07
		2284.8	2.62668e-07
		2286.4	2.5438e-07
		2288	2.46326e-07
		2289.6	2.38499e-07
		2291.2	2.30894e-07
		2292.8	2.23507e-07
		2294.4	2.16331e-07
		2296	2.0434e-07
		2297.6	1.9776e-07
		2299.2	1.91371e-07
		2300.8	1.85166e-07
		2302.4	1.79143e-07
		2304	1.73296e-07
		2305.6	1.67621e-07
		2307.2	1.62114e-07
		2308.8	1.56771e-07
		2310.4	1.51587e-07
		2312	1.46558e-07
		2313.6	1.4168e-07
		2315.2	1.3695e-07
		2316.8	1.32363e-07
		2318.4	1.27916e-07
		2320	1.23606e-07
		2321.6	1.19427e-07
		2323.2	1.15378e-07
		2324.8	1.11454e-07
		2326.4	1.07652e-07
		2328	1.03969e-07
		2329.6	1.00402e-07
		2331.2	9.69465e-08
		2332.8	9.36006e-08
		2334.4	9.0361e-08
		2336	8.72246e-08
		2337.6	8.41886e-08
		2339.2	8.12501e-08
		2340.8	7.84063e-08
		2342.4	7.56546e-08
		2344	6.78251e-08
		2345.6	6.53423e-08
		2347.2	6.29422e-08
		2348.8	6.06225e-08
		2350.4	5.83807e-08
		2352	5.62146e-08
		2353.6	5.41219e-08
		2355.2	5.21004e-08
		2356.8	5.01479e-08
		2358.4	4.82624e-08
		2360	4.64418e-08
		2361.6	4.46841e-08
		2363.2	4.29874e-08
		2364.8	4.13498e-08
		2366.4	3.97694e-08
		2368	3.82445e-08
		2369.6	3.67734e-08
		2371.2	3.53542e-08
		2372.8	3.39855e-08
		2374.4	3.26655e-08
		2376	3.13928e-08
		2377.6	3.01657e-08
		2379.2	2.89829e-08
		2380.8	2.78429e-08
		2382.4	2.67443e-08
		2384	2.56857e-08
		2385.6	2.46658e-08
		2387.2	2.36834e-08
		2388.8	2.27371e-08
		2390.4	2.18259e-08
		2392	2.09485e-08
		2393.6	2.01038e-08
		2395.2	1.92906e-08
		2396.8	1.85079e-08
		2398.4	1.77548e-08
		2400	1.703e-08
		2401.6	1.63328e-08
		2403.2	1.5662e-08
		2404.8	1.50169e-08
		2406.4	1.43965e-08
		2408	1.38e-08
		2409.6	1.32264e-08
		2411.2	1.26751e-08
		2412.8	1.21452e-08
		2414.4	1.16359e-08
		2416	1.11466e-08
		2417.6	1.06764e-08
		2419.2	1.02248e-08
		2420.8	9.79102e-09
		2422.4	9.37443e-09
		2424	8.9744e-09
		2425.6	8.59034e-09
		2427.2	8.22166e-09
		2428.8	7.86778e-09
		2430.4	7.52816e-09
		2432	7.20228e-09
		2433.6	6.88962e-09
		2435.2	6.58968e-09
		2436.8	6.30198e-09
		2438.4	6.02607e-09
		2440	5.7615e-09
		2441.6	5.50783e-09
		2443.2	5.26465e-09
		2444.8	0
		2446.4	0
		2448	0
		2449.6	0
		2451.2	0
		2452.8	0
		2454.4	0
		2456	0
		2457.6	0
		2459.2	0
		2460.8	0
		2462.4	0
		2464	0
		2465.6	0
		2467.2	0
		2468.8	0
		2470.4	5.33339e-09
		2472	5.8211e-09
		2473.6	6.35056e-09
		2475.2	6.92505e-09
		2476.8	7.54811e-09
		2478.4	8.22352e-09
		2480	8.95534e-09
		2481.6	9.74789e-09
		2483.2	1.06058e-08
		2484.8	1.1534e-08
		2486.4	1.25379e-08
		2488	1.36229e-08
		2489.6	1.47952e-08
		2491.2	1.60611e-08
		2492.8	1.74275e-08
		2494.4	1.89016e-08
		2496	2.04912e-08
		2497.6	2.22045e-08
		2499.2	2.40501e-08
		2500.8	2.60375e-08
		2502.4	2.81764e-08
		2504	3.04772e-08
		2505.6	3.29512e-08
		2507.2	3.56098e-08
		2508.8	3.84657e-08
		2510.4	4.15319e-08
		2512	4.48223e-08
		2513.6	4.83517e-08
		2515.2	5.21354e-08
		2516.8	5.619e-08
		2518.4	6.05326e-08
		2520	6.51814e-08
		2521.6	7.01557e-08
		2523.2	7.54756e-08
		2524.8	8.11623e-08
		2526.4	8.72382e-08
		2528	9.37268e-08
		2529.6	1.00653e-07
		2531.2	1.08041e-07
		2532.8	1.15921e-07
		2534.4	1.24318e-07
		2536	1.33264e-07
		2537.6	1.4279e-07
		2539.2	1.52927e-07
		2540.8	1.63711e-07
		2542.4	1.75176e-07
		2544	1.87359e-07
		2545.6	2.003e-07
		2547.2	2.14038e-07
		2548.8	2.28615e-07
		2550.4	2.44075e-07
		2552	2.60463e-07
		2553.6	2.77827e-07
		2555.2	2.96214e-07
		2556.8	3.15676e-07
		2558.4	3.36266e-07
		2560	3.58037e-07
		2561.6	3.81046e-07
		2563.2	4.05351e-07
		2564.8	4.31013e-07
		2566.4	4.58092e-07
		2568	4.86654e-07
		2569.6	5.16764e-07
		2571.2	5.48489e-07
		2572.8	5.819e-07
		2574.4	6.17069e-07
		2576	6.54068e-07
		2577.6	6.92974e-07
		2579.2	7.33863e-07
		2580.8	7.82821e-07
		2582.4	8.29784e-07
		2584	8.79513e-07
		2585.6	9.32237e-07
		2587.2	9.88218e-07
		2588.8	1.04776e-06
		2590.4	1.11123e-06
		2592	1.17904e-06
		2593.6	1.25169e-06
		2595.2	1.32974e-06
		2596.8	1.41387e-06
		2598.4	1.51068e-06
		2600	1.61139e-06
		2601.6	1.72156e-06
		2603.2	1.84259e-06
		2604.8	1.98213e-06
		2606.4	2.13257e-06
		2608	2.30062e-06
		2609.6	2.48917e-06
		2611.2	2.70163e-06
		2612.8	2.94193e-06
		2614.4	3.21469e-06
		2616	3.52519e-06
		2617.6	3.87957e-06
		2619.2	4.28485e-06
		2620.8	4.74907e-06
		2622.4	5.28139e-06
		2624	5.89219e-06
		2625.6	6.59317e-06
		2627.2	7.3975e-06
		2628.8	8.31985e-06
		2630.4	9.37654e-06
		2632	1.05855e-05
		2633.6	1.19666e-05
		2635.2	1.35412e-05
		2636.8	1.53324e-05
		2638.4	1.73651e-05
		2640	1.96708e-05
		2641.6	2.22695e-05
		2643.2	2.51936e-05
		2644.8	2.84728e-05
		2646.4	3.21377e-05
		2648	3.62184e-05
		2649.6	4.07447e-05
		2651.2	4.57453e-05
		2652.8	5.1247e-05
		2654.4	5.72744e-05
		2656	6.38489e-05
		2657.6	7.09879e-05
		2659.2	7.87047e-05
		2660.8	8.70075e-05
		2662.4	9.58988e-05
		2664	0.000105375
		2665.6	0.000115428
		2667.2	0.00012604
		2668.8	0.000137189
		2670.4	0.000148845
		2672	0.000160973
		2673.6	0.000173529
		2675.2	0.000186465
		2676.8	0.000199722
		2678.4	0.000213238
		2680	0.000226941
		2681.6	0.000240752
		2683.2	0.000254581
		2684.8	0.000268332
		2686.4	0.000281896
		2688	0.000295155
		2689.6	0.000307986
		2691.2	0.000320239
		2692.8	0.000331772
		2694.4	0.000342428
		2696	0.000352045
		2697.6	0.000360462
		2699.2	0.000367517
		2700.8	0.00037306
		2702.4	0.000376952
		2704	0.000379074
		2705.6	0.000379333
		2707.2	0.000377667
		2708.8	0.00037405
		2710.4	0.000368496
		2712	0.00036106
		2713.6	0.000351842
		2715.2	0.000340984
		2716.8	0.000328666
		2718.4	0.000315103
		2720	0.000300539
		2721.6	0.00028524
		2723.2	0.000269486
		2724.8	0.000253561
		2726.4	0.000237747
		2728	0.000222312
		2729.6	0.000207507
		2731.2	0.000193559
		2732.8	0.000180661
		2734.4	0.000168975
		2736	0.000158622
		2737.6	0.000149689
		2739.2	0.000142221
		2740.8	0.000136226
		2742.4	0.000131676
		2744	0.00012851
		2745.6	0.000126637
		2747.2	0.000125938
		2748.8	0.000126271
		2750.4	0.000127478
		2752	0.000129385
		2753.6	0.00013181
		2755.2	0.000134565
		2756.8	0.000137465
		2758.4	0.000140329
		2760	0.000142985
		2761.6	0.000145277
		2763.2	0.000147067
		2764.8	0.000148237
		2766.4	0.000148696
		2768	0.000148377
		2769.6	0.000147241
		2771.2	0.000145276
		2772.8	0.000142495
		2774.4	0.000138939
		2776	0.000134666
		2777.6	0.000129757
		2779.2	0.000124305
		2780.8	0.000118414
		2782.4	0.000112196
		2784	0.000105763
		2785.6	9.92224e-05
		2787.2	9.26841e-05
		2788.8	8.6249e-05
		2790.4	7.99976e-05
		2792	7.40034e-05
		2793.6	6.8326e-05
		2795.2	6.30112e-05
		2796.8	5.80906e-05
		2798.4	5.35828e-05
		2800	4.94944e-05
		2801.6	4.58214e-05
		2803.2	4.2551e-05
		2804.8	3.96631e-05
		2806.4	3.71283e-05
		2808	3.49263e-05
		2809.6	3.30206e-05
		2811.2	3.1379e-05
		2812.8	2.99646e-05
		2814.4	2.8757e-05
		2816	2.77211e-05
		2817.6	2.68299e-05
		2819.2	2.60592e-05
		2820.8	2.53876e-05
		2822.4	2.47963e-05
		2824	2.42691e-05
		2825.6	2.37922e-05
		2827.2	2.33543e-05
		2828.8	2.2946e-05
		2830.4	2.25596e-05
		2832	2.21892e-05
		2833.6	2.18298e-05
		2835.2	2.14779e-05
		2836.8	2.11306e-05
		2838.4	2.07858e-05
		2840	2.04421e-05
		2841.6	2.00984e-05
		2843.2	1.97541e-05
		2844.8	1.94086e-05
		2846.4	1.90618e-05
		2848	1.87095e-05
		2849.6	1.83614e-05
		2851.2	1.80118e-05
		2852.8	1.76608e-05
		2854.4	1.73089e-05
		2856	1.69563e-05
		2857.6	1.66035e-05
		2859.2	1.62506e-05
		2860.8	1.58982e-05
		2862.4	1.55463e-05
		2864	1.51954e-05
		2865.6	1.48457e-05
		2867.2	1.44976e-05
		2868.8	1.41512e-05
		2870.4	1.38069e-05
		2872	1.34649e-05
		2873.6	1.31255e-05
		2875.2	1.27888e-05
		2876.8	1.24552e-05
		2878.4	1.21248e-05
		2880	1.17979e-05
		2881.6	1.14746e-05
		2883.2	1.11552e-05
		2884.8	1.08397e-05
		2886.4	1.05285e-05
		2888	1.02216e-05
		2889.6	9.9191e-06
		2891.2	9.62127e-06
		2892.8	9.32818e-06
		2894.4	9.03995e-06
		2896	8.75668e-06
		2897.6	8.47846e-06
		2899.2	8.20539e-06
		2900.8	7.93754e-06
		2902.4	7.67497e-06
		2904	7.41775e-06
		2905.6	7.16592e-06
		2907.2	6.91953e-06
		2908.8	6.6786e-06
		2910.4	6.44315e-06
		2912	6.21321e-06
		2913.6	5.98877e-06
		2915.2	5.76985e-06
		2916.8	5.55642e-06
		2918.4	5.34848e-06
		2920	5.146e-06
		2921.6	4.94896e-06
		2923.2	4.75732e-06
		2924.8	4.57104e-06
		2926.4	4.39008e-06
		2928	4.21439e-06
		2929.6	4.0439e-06
		2931.2	3.87856e-06
		2932.8	3.71831e-06
		2934.4	3.56308e-06
		2936	3.41279e-06
		2937.6	3.26736e-06
		2939.2	3.12673e-06
		2940.8	2.9908e-06
		2942.4	2.85949e-06
		2944	2.73272e-06
		2945.6	2.61039e-06
		2947.2	2.49241e-06
		2948.8	2.3787e-06
		2950.4	2.26915e-06
		2952	2.16367e-06
		2953.6	2.06216e-06
		2955.2	1.96454e-06
		2956.8	1.87069e-06
		2958.4	1.78052e-06
		2960	1.69394e-06
		2961.6	1.61084e-06
		2963.2	1.53113e-06
		2964.8	1.4547e-06
		2966.4	1.38147e-06
		2968	1.31134e-06
		2969.6	1.2442e-06
		2971.2	1.17997e-06
		2972.8	1.11856e-06
		2974.4	1.05986e-06
		2976	1.00379e-06
		2977.6	9.50256e-07
		2979.2	8.99174e-07
		2980.8	8.50455e-07
		2982.4	8.04013e-07
		2984	7.59766e-07
		2985.6	7.1763e-07
		2987.2	6.77526e-07
		2988.8	6.39375e-07
		2990.4	6.031e-07
		2992	5.68628e-07
		2993.6	5.35884e-07
		2995.2	5.04799e-07
		2996.8	4.75303e-07
		2998.4	4.47328e-07
		3000	4.20811e-07
		3001.6	3.95687e-07
		3003.2	3.71896e-07
		3004.8	3.49378e-07
		3006.4	3.28075e-07
		3008	3.07933e-07
		3009.6	2.88897e-07
		3011.2	2.70916e-07
		3012.8	2.5394e-07
		3014.4	2.3792e-07
		3016	2.22811e-07
		3017.6	2.08567e-07
		3019.2	1.95146e-07
		3020.8	1.82506e-07
		3022.4	1.70608e-07
		3024	1.59414e-07
		3025.6	1.48887e-07
		3027.2	1.38993e-07
		3028.8	1.29698e-07
		3030.4	1.2097e-07
		3032	1.12779e-07
		3033.6	1.05095e-07
		3035.2	9.78901e-08
		3036.8	9.11384e-08
		3038.4	8.48141e-08
		3040	7.88931e-08
		3041.6	7.33524e-08
		3043.2	6.81702e-08
		3044.8	6.33255e-08
		3046.4	5.87987e-08
		3048	5.45709e-08
		3049.6	5.06242e-08
		3051.2	4.69419e-08
		3052.8	4.35078e-08
		3054.4	4.03068e-08
		3056	3.73244e-08
		3057.6	3.45472e-08
		3059.2	3.19622e-08
		3060.8	2.95574e-08
		3062.4	2.73211e-08
		3064	2.52427e-08
		3065.6	2.33119e-08
		3067.2	2.15191e-08
		3068.8	1.98552e-08
		3070.4	1.83118e-08
		3072	1.68807e-08
		3073.6	1.55544e-08
		3075.2	1.43259e-08
		3076.8	1.31885e-08
		3078.4	1.21359e-08
		3080	1.11623e-08
		3081.6	1.02622e-08
		3083.2	9.4304e-09
		3084.8	8.66213e-09
		3086.4	7.95287e-09
		3088	7.2984e-09
		3089.6	6.69477e-09
		3091.2	6.1383e-09
		3092.8	5.62556e-09
		3094.4	0
		3096	0
		3097.6	0
		3099.2	0
		3100.8	0
		3102.4	0
		3104	0
		3105.6	0
		3107.2	0
		3108.8	0
		3110.4	0
		3112	0
		3113.6	0
		3115.2	0
		3116.8	0
		3118.4	0
		3120	0
		3121.6	0
		3123.2	0
		3124.8	0
		3126.4	0
		3128	0
		3129.6	0
		3131.2	0
		3132.8	0
		3134.4	0
		3136	0
		3137.6	0
		3139.2	0
		3140.8	0
		3142.4	0
		3144	0
		3145.6	0
		3147.2	0
		3148.8	0
		3150.4	0
		3152	0
		3153.6	0
		3155.2	0
		3156.8	0
		3158.4	0
		3160	0
		3161.6	0
		3163.2	0
		3164.8	0
		3166.4	0
		3168	0
		3169.6	0
		3171.2	0
		3172.8	0
		3174.4	0
		3176	0
		3177.6	0
		3179.2	0
		3180.8	0
		3182.4	0
		3184	0
		3185.6	0
		3187.2	0
		3188.8	0
		3190.4	0
		3192	0
		3193.6	0
		3195.2	0
		3196.8	0
		3198.4	0
[truncated: 1 more rows]

## Sheet: PlotDat8
Source sheet	Sheet1	0	0	300	0	0	0
Plot name	ProbDens6	2	0	350	0	3998	0
Plot Type	16	4	0	350	1
1st free col	9	6	0	300	1
Sigma Level	1	8	0	300	0
Absolute Errs	TRUE	10	0	ErrBox	ErrBox
Symbol Type	1	12	0	450	0
Inverse Plot	FALSE	14	0	500	0
Color Plot	TRUE	16	0	500	3
3D plot	FALSE	18	0	450	3
Linear	FALSE	20	0	450	0
Data Range	E2:F86	22	0	ErrBox	ErrBox
Filled Symbols	FALSE	24	0	600	0
ConcAge	FALSE	26	0	650	0
ConcSwap	FALSE	28	0	650	4
1st Symbol-row	1	30	0	600	4
		32	0	600	0
		34	0	ErrBox	ErrBox
		36	0	750	0
		38	0	800	0
		40	0	800	1
		42	0	750	1
		44	0	750	0
		46	0	ErrBox	ErrBox
		48	0	1000	0
		50	0	1050	0
		52	0	1050	3
		54	0	1000	3
		56	0	1000	0
		58	0	ErrBox	ErrBox
		60	0	1050	0
		62	0	1100	0
		64	0	1100	3
		66	0	1050	3
		68	0	1050	0
		70	0	ErrBox	ErrBox
		72	0	1100	0
		74	0	1150	0
		76	0	1150	5
		78	0	1100	5
		80	0	1100	0
		82	0	ErrBox	ErrBox
		84	0	1150	0
		86	0	1200	0
		88	0	1200	4
		90	0	1150	4
		92	0	1150	0
		94	0	ErrBox	ErrBox
		96	0	1200	0
		98	0	1250	0
		100	0	1250	1
		102	0	1200	1
		104	0	1200	0
		106	0	ErrBox	ErrBox
		108	0	1250	0
		110	0	1300	0
		112	0	1300	2
		114	0	1250	2
		116	0	1250	0
		118	0	ErrBox	ErrBox
		120	0	1300	0
		122	0	1350	0
		124	0	1350	1
		126	0	1300	1
		128	0	1300	0
		130	0	ErrBox	ErrBox
		132	0	1350	0
		134	0	1400	0
		136	0	1400	1
		138	0	1350	1
		140	0	1350	0
		142	0	ErrBox	ErrBox
		144	0	1400	0
		146	0	1450	0
		148	0	1450	6
		150	0	1400	6
		152	0	1400	0
		154	0	ErrBox	ErrBox
		156	0	1450	0
		158	0	1500	0
		160	0	1500	2
		162	0	1450	2
		164	0	1450	0
		166	0	ErrBox	ErrBox
		168	0	1600	0
		170	0	1650	0
		172	0	1650	7
		174	0	1600	7
		176	0	1600	0
		178	0	ErrBox	ErrBox
		180	0	1650	0
		182	0	1700	0
		184	0	1700	8
		186	0	1650	8
		188	0	1650	0
		190	0	ErrBox	ErrBox
		192	0	1700	0
		194	0	1750	0
		196	0	1750	9
		198	0	1700	9
		200	0	1700	0
		202	0	ErrBox	ErrBox
		204	0	1750	0
		206	0	1800	0
		208	0	1800	6
		210	0	1750	6
		212	0	1750	0
		214	0	ErrBox	ErrBox
		216	0	1800	0
		218	0	1850	0
		220	0	1850	2
		222	0	1800	2
		224	0	1800	0
		226	0	ErrBox	ErrBox
		228	0	1900	0
		230	0	1950	0
		232	0	1950	2
		234	0	1900	2
		236	0	1900	0
		238	0	ErrBox	ErrBox
		240	0	1950	0
		242	1.51253e-08	2000	0
		244	2.70364e-08	2000	5
		246	4.7489e-08	1950	5
		248	8.19664e-08	1950	0
		250	1.3902e-07	ErrBox	ErrBox
		252	2.31695e-07	2000	0
		254	3.79451e-07	2050	0
		256	6.1065e-07	2050	1
		258	9.65669e-07	2000	1
		260	1.50059e-06	2000	0
		262	2.29137e-06	ErrBox	ErrBox
		264	3.43816e-06	2050	0
		266	5.06939e-06	2100	0
		268	7.34487e-06	2100	1
		270	1.04571e-05	2050	1
		272	1.46297e-05	2050	0
		274	2.01122e-05	ErrBox	ErrBox
		276	2.71696e-05	2200	0
		278	3.60665e-05	2250	0
		280	4.70461e-05	2250	1
		282	6.03035e-05	2200	1
		284	7.59555e-05	2200	0
		286	9.40101e-05	ErrBox	ErrBox
		288	0.000114337	2550	0
		290	0.000136647	2600	0
		292	0.000160477	2600	1
		294	0.000185192	2550	1
		296	0.000210005	2550	0
		298	0.000234011	ErrBox	ErrBox
		300	0.000256237	2600	0
		302	0.000275705	2650	0
		304	0.000291506	2650	1
		306	0.000302864	2600	1
		308	0.000309206	2600	0
		310	0.000310203	ErrBox	ErrBox
		312	0.000305803	2750	0
		314	0.000296236	2800	0
		316	0.000281988	2800	1
		318	0.000263769	2750	1
		320	0.000242446	2750	0
		322	0.00021898	ErrBox	ErrBox
		324	0.000194353	2850	0
		326	0.000169503	2900	0
		328	0.000145266	2900	1
		330	0.000122334	2850	1
		332	0.000101235	2850	0
		334	8.23207e-05	ErrBox	ErrBox
		336	6.57792e-05	2900	0
		338	5.16495e-05	2950	0
		340	3.98513e-05	2950	1
		342	3.02146e-05	2900	1
		344	2.25237e-05	2900	0
		346	1.6498e-05	ErrBox	ErrBox
		348	1.1893e-05	3750	0
		350	8.43295e-06	3800	0
		352	5.89386e-06	3800	1
		354	4.07327e-06	3750	1
		356	2.80175e-06	3750	0
		358	1.9427e-06	ErrBox	ErrBox
		360	1.38997e-06
		362	1.06426e-06
		364	9.09058e-07
		366	8.99574e-07
		368	9.93661e-07
		370	1.19063e-06
		372	1.49136e-06
		374	1.90538e-06
		376	2.44985e-06
		378	3.13859e-06
		380	4.02818e-06
		382	5.13938e-06
		384	6.51819e-06
		386	8.21761e-06
		388	1.02981e-05
		390	1.28277e-05
		392	1.58824e-05
		394	1.95456e-05
		396	2.39077e-05
		398	2.90655e-05
		400	3.51206e-05
		402	4.21779e-05
		404	5.03431e-05
		406	5.97204e-05
		408	7.0409e-05
		410	8.24997e-05
		412	9.60706e-05
		414	0.000111183
		416	0.000127877
		418	0.000146167
		420	0.000166037
		422	0.000187435
		424	0.000210276
		426	0.000234429
		428	0.000259725
		430	0.000285951
		432	0.000312852
		434	0.000340136
		436	0.000367473
		438	0.000394504
		440	0.000420848
		442	0.00044611
		444	0.000469886
		446	0.000491782
		448	0.000511417
		450	0.000528438
		452	0.000542527
		454	0.000553417
		456	0.000560892
		458	0.000564803
		460	0.000565067
		462	0.00056167
		464	0.000554673
		466	0.000544204
		468	0.00053046
		470	0.000513695
		472	0.000494217
		474	0.000472376
		476	0.000448554
		478	0.000423155
		480	0.00039659
		482	0.00036927
		484	0.000341594
		486	0.000313939
		488	0.000286652
		490	0.000260045
		492	0.000234386
		494	0.000209902
		496	0.000186774
		498	0.000165137
		500	0.000145083
		502	0.000126663
		504	0.000109892
		506	9.47503e-05
		508	8.11933e-05
		510	6.91525e-05
		512	5.85424e-05
		514	4.92646e-05
		516	4.12252e-05
		518	3.42928e-05
		520	2.83654e-05
		522	2.33338e-05
		524	1.90931e-05
		526	1.55448e-05
		528	1.25974e-05
		530	1.01677e-05
		532	8.18098e-06
		534	6.58687e-06
		536	5.30586e-06
		538	4.2999e-06
		540	3.52981e-06
		542	2.96476e-06
		544	2.58214e-06
		546	2.38369e-06
		548	2.34043e-06
		550	2.48149e-06
		552	2.80099e-06
		554	3.33536e-06
		556	4.11606e-06
		558	5.22021e-06
		560	6.70754e-06
		562	8.67025e-06
		564	1.12216e-05
		566	1.44884e-05
		568	1.86512e-05
		570	2.38806e-05
		572	3.03832e-05
		574	3.83858e-05
		576	4.81311e-05
		578	5.98597e-05
		580	7.38519e-05
		582	9.03362e-05
		584	0.000109536
		586	0.00013164
		588	0.000156788
		590	0.000185057
		592	0.000216445
		594	0.000250864
		596	0.000288127
		598	0.000327945
		600	0.000369922
		602	0.000413561
		604	0.000458271
		606	0.000503378
		608	0.000548143
		610	0.000591779
		612	0.00063348
		614	0.000672438
		616	0.000707874
		618	0.000739062
		620	0.000765354
		622	0.000786199
		624	0.000801165
		626	0.000809951
		628	0.000812399
		630	0.000808503
		632	0.000798399
		634	0.000782372
		636	0.00076085
		638	0.000734342
		640	0.000703489
		642	0.000668996
		644	0.000631616
		646	0.000592126
		648	0.000551299
		650	0.000509878
		652	0.000468559
		654	0.000427965
		656	0.000388639
		658	0.00035103
		660	0.00031549
		662	0.000282275
		664	0.000251548
		666	0.000223391
		668	0.000197809
		670	0.000174748
		672	0.000154104
		674	0.00013574
		676	0.000119492
		678	0.000105189
		680	9.26503e-05
		682	8.17044e-05
		684	7.21868e-05
		686	6.39468e-05
		688	5.68615e-05
		690	5.07878e-05
		692	4.56347e-05
		694	4.13146e-05
		696	3.7745e-05
		698	3.48866e-05
		700	3.26746e-05
		702	3.10678e-05
		704	3.00319e-05
		706	2.95382e-05
		708	2.95622e-05
		710	3.00827e-05
		712	3.10804e-05
		714	3.25377e-05
		716	3.44254e-05
		718	3.67544e-05
		720	3.94921e-05
		722	4.26186e-05
		724	4.6111e-05
		726	4.99479e-05
		728	5.4105e-05
		730	5.85555e-05
		732	6.32697e-05
		734	6.82149e-05
		736	7.33553e-05
		738	7.86521e-05
		740	8.40765e-05
		742	8.95597e-05
		744	9.50663e-05
		746	0.000100548
		748	0.000105953
		750	0.00011123
		752	0.000116328
		754	0.000121195
		756	0.00012578
		758	0.000130035
		760	0.000133912
		762	0.000137369
		764	0.000140367
		766	0.000142872
		768	0.000144855
		770	0.000146284
		772	0.000147162
		774	0.000147468
		776	0.000147198
		778	0.000146356
		780	0.000144953
		782	0.000143004
		784	0.000140533
		786	0.00013757
		788	0.000134147
		790	0.000130317
		792	0.000126097
		794	0.000121557
		796	0.000116723
		798	0.000111655
		800	0.000106402
		802	0.000101015
		804	9.55428e-05
		806	9.0033e-05
		808	8.4531e-05
		810	7.90794e-05
		812	7.37177e-05
		814	6.84817e-05
		816	6.34033e-05
		818	5.85104e-05
		820	5.38269e-05
		822	4.93721e-05
		824	4.5174e-05
		826	4.12203e-05
		828	3.75301e-05
		830	3.41079e-05
		832	3.09547e-05
		834	2.80687e-05
		836	2.54455e-05
		838	2.30787e-05
		840	2.09599e-05
		842	1.90793e-05
		844	1.74389e-05
		846	1.60028e-05
		848	1.47703e-05
		850	1.37289e-05
		852	1.28662e-05
		854	1.21699e-05
		856	1.16281e-05
		858	1.12295e-05
		860	1.09758e-05
		862	1.08331e-05
		864	1.08171e-05
		866	1.09073e-05
		868	1.10853e-05
		870	1.13546e-05
		872	1.17097e-05
		874	1.21456e-05
		876	1.2658e-05
		878	1.32437e-05
		880	1.38998e-05
		882	1.46245e-05
		884	1.54163e-05
		886	1.6287e-05
		888	1.72133e-05
		890	1.82061e-05
		892	1.92659e-05
		894	2.0406e-05
		896	2.16043e-05
		898	2.28738e-05
		900	2.42167e-05
		902	2.56353e-05
		904	2.7132e-05
		906	2.87096e-05
		908	3.03713e-05
		910	3.21201e-05
		912	3.39855e-05
		914	3.59137e-05
		916	3.79656e-05
		918	4.0108e-05
		920	4.2357e-05
		922	4.4717e-05
		924	4.71925e-05
		926	4.97883e-05
		928	5.25092e-05
		930	5.53602e-05
		932	5.83464e-05
		934	6.1473e-05
		936	6.47453e-05
		938	6.81687e-05
		940	7.17486e-05
		942	7.54908e-05
		944	7.94006e-05
		946	8.34837e-05
		948	8.77458e-05
		950	9.22044e-05
		952	9.68584e-05
		954	0.0001017
		956	0.000106744
		958	0.000111997
		960	0.000117466
		962	0.000123155
		964	0.00012907
		966	0.000135217
		968	0.000141602
		970	0.00014823
		972	0.000155119
		974	0.000162254
		976	0.00016965
		978	0.000177327
		980	0.000185267
		982	0.000193488
		984	0.000201998
		986	0.000210806
		988	0.000219922
		990	0.000229354
		992	0.000239117
		994	0.000249221
		996	0.000259684
		998	0.00027052
		1000	0.000281751
		1002	0.000293395
		1004	0.000305478
		1006	0.000318025
		1008	0.000331063
		1010	0.000344625
		1012	0.000358742
		1014	0.000373449
		1016	0.000388782
		1018	0.000404777
		1020	0.000421471
		1022	0.000438912
		1024	0.000457109
		1026	0.000476105
		1028	0.000495923
		1030	0.000516585
		1032	0.000538099
		1034	0.000560467
		1036	0.000583679
		1038	0.00060771
		1040	0.000632522
		1042	0.000658059
		1044	0.000684247
		1046	0.000710995
		1048	0.000738191
		1050	0.000765704
		1052	0.000793386
		1054	0.000821067
		1056	0.000848565
		1058	0.000875682
		1060	0.00090222
		1062	0.000927945
		1064	0.000952643
		1066	0.000976094
		1068	0.000998097
		1070	0.00101842
		1072	0.00103689
		1074	0.00105333
		1076	0.00106759
		1078	0.00107956
		1080	0.00108914
		1082	0.0010963
		1084	0.00110102
		1086	0.00110332
		1088	0.00110327
		1090	0.00110099
		1092	0.00109661
		1094	0.00109033
		1096	0.00108237
		1098	0.00107297
		1100	0.00106241
		1102	0.00105098
		1104	0.00103898
		1106	0.00102672
		1108	0.00101449
		1110	0.00100257
		1112	0.000991223
		1114	0.000980656
		1116	0.000971044
		1118	0.000962503
		1120	0.000955093
		1122	0.000948807
		1124	0.000943572
		1126	0.000939251
		1128	0.000935648
		1130	0.000932511
		1132	0.000929551
		1134	0.000926445
		1136	0.00092286
		1138	0.000918466
		1140	0.000912953
		1142	0.000906047
		1144	0.000897524
		1146	0.000887225
		1148	0.000875059
		1150	0.000861015
		1152	0.000845153
		1154	0.000827608
		1156	0.000808578
		1158	0.000788316
		1160	0.000767114
		1162	0.000745289
		1164	0.000723169
		1166	0.000701077
		1168	0.000679318
		1170	0.000658169
		1172	0.000637867
		1174	0.000618606
		1176	0.000600533
		1178	0.000583746
		1180	0.000568301
		1182	0.000554207
		1184	0.000541442
		1186	0.000529951
		1188	0.000519657
		1190	0.000510465
		1192	0.000502271
		1194	0.000494967
		1196	0.000488442
		1198	0.000482582
		1200	0.000477309
		1202	0.000472518
		1204	0.000468118
		1206	0.000464061
		1208	0.000460272
		1210	0.000456698
		1212	0.000453296
		1214	0.00045003
		1216	0.00044687
		1218	0.000443807
		1220	0.000440797
		1222	0.000437838
		1224	0.000434919
		1226	0.000432031
		1228	0.000429168
		1230	0.000426325
		1232	0.000423501
		1234	0.000420669
		1236	0.000417881
		1238	0.000415106
		1240	0.000412344
		1242	0.000409597
		1244	0.000406865
		1246	0.00040415
		1248	0.000401454
		1250	0.000398779
		1252	0.000396115
		1254	0.000393487
		1256	0.000390885
		1258	0.00038831
		1260	0.000385764
		1262	0.000383249
		1264	0.000380767
		1266	0.000378319
		1268	0.000375906
		1270	0.000373531
		1272	0.000371195
		1274	0.000368898
		1276	0.000366642
		1278	0.000364427
		1280	0.000362254
		1282	0.000360113
		1284	0.000358028
		1286	0.000355985
		1288	0.000353986
		1290	0.00035203
		1292	0.000350116
		1294	0.000348236
		1296	0.000346414
		1298	0.000344648
		1300	0.000342913
		1302	0.00034122
		1304	0.000339568
		1306	0.000337958
		1308	0.00033639
		1310	0.000334863
		1312	0.000333379
		1314	0.000331966
		1316	0.000330579
		1318	0.000329242
		1320	0.000327958
		1322	0.000326731
		1324	0.000325567
		1326	0.000324473
		1328	0.000323458
		1330	0.000322531
		1332	0.000321706
		1334	0.000320997
		1336	0.000320423
		1338	0.000320003
		1340	0.000319751
		1342	0.000319717
		1344	0.00031992
		1346	0.000320396
		1348	0.000321183
		1350	0.000322325
		1352	0.000323869
		1354	0.000325867
		1356	0.000328375
		1358	0.000331452
		1360	0.000335158
		1362	0.000339559
		1364	0.000344718
		1366	0.000350702
		1368	0.000357574
		1370	0.000365394
		1372	0.000374232
		1374	0.000384114
		1376	0.000395114
		1378	0.000407237
		1380	0.000420517
		1382	0.000434965
		1384	0.000450576
		1386	0.000467321
		1388	0.000485192
		1390	0.000504131
		1392	0.000524081
		1394	0.000544976
		1396	0.000566742
		1398	0.000589307
		1400	0.000612597
		1402	0.000636548
		1404	0.000661106
		1406	0.000686228
		1408	0.000711885
		1410	0.000738056
		1412	0.000764727
		1414	0.000791873
		1416	0.000819452
		1418	0.000847381
		1420	0.000875526
		1422	0.000903673
		1424	0.000931521
		1426	0.000958666
		1428	0.000984599
		1430	0.00100871
		1432	0.00103032
		1434	0.0010487
		1436	0.00106306
		1438	0.00107271
		1440	0.00107701
		1442	0.00107546
		1444	0.00106772
		1446	0.00105369
		1448	0.00103347
		1450	0.00100744
		1452	0.000976081
		1454	0.000940173
		1456	0.00090059
		1458	0.000858295
		1460	0.000814297
		1462	0.000769558
		1464	0.000724965
		1466	0.000681321
		1468	0.000639278
		1470	0.000599341
		1472	0.000561859
		1474	0.000527039
		1476	0.00049495
		1478	0.000465601
		1480	0.000438862
		1482	0.000414554
		1484	0.000392487
		1486	0.000372433
		1488	0.000354199
		1490	0.000337566
		1492	0.000322356
		1494	0.000308379
		1496	0.0002955
		1498	0.000283589
		1500	0.000272566
		1502	0.00026234
		1504	0.000252846
		1506	0.000244033
		1508	0.000235862
		1510	0.000228304
		1512	0.000221338
		1514	0.000214936
		1516	0.000209115
		1518	0.000203846
		1520	0.000199153
		1522	0.000195035
		1524	0.000191476
		1526	0.000188508
		1528	0.000186118
		1530	0.000184329
		1532	0.000183156
		1534	0.000182615
		1536	0.000182735
		1538	0.000183524
		1540	0.000184992
		1542	0.000187168
		1544	0.000190063
		1546	0.000193711
		1548	0.000198142
		1550	0.000203379
		1552	0.000209421
		1554	0.0002163
		1556	0.000224052
		1558	0.000232687
		1560	0.000242215
		1562	0.00025267
		1564	0.000264073
		1566	0.000276446
		1568	0.000289804
		1570	0.000304189
		1572	0.000319613
		1574	0.000336111
		1576	0.000353703
		1578	0.000372413
		1580	0.000392252
		1582	0.000413258
		1584	0.000435454
		1586	0.000458878
		1588	0.000483537
		1590	0.00050944
		1592	0.000536606
		1594	0.000565042
		1596	0.000594744
		1598	0.000625695
		1600	0.00065787
		1602	0.000691216
		1604	0.000725698
		1606	0.00076123
		1608	0.000797722
		1610	0.000835065
		1612	0.000873133
		1614	0.000911786
		1616	0.000950873
		1618	0.00099026
		1620	0.00102974
		1622	0.00106919
		1624	0.00110843
		1626	0.00114733
		1628	0.00118579
		1630	0.00122371
		1632	0.00126105
		1634	0.00129785
		1636	0.00133417
		1638	0.00137021
		1640	0.00140625
		1642	0.00144263
		1644	0.00147981
		1646	0.00151835
		1648	0.00155882
		1650	0.0016018
		1652	0.00164779
		1654	0.00169711
		1656	0.00174983
		1658	0.00180564
		1660	0.00186382
		1662	0.00192321
		1664	0.00198221
		1666	0.0020389
		1668	0.00209118
		1670	0.00213699
		1672	0.00217447
		1674	0.00220225
		1676	0.00221959
		1678	0.00222647
		1680	0.00222364
		1682	0.00221253
		1684	0.00219512
		1686	0.00217368
		1688	0.00215063
		1690	0.00212827
		1692	0.00210861
		1694	0.00209322
		1696	0.00208313
		1698	0.00207885
		1700	0.00208031
		1702	0.002087
		1704	0.00209795
		1706	0.00211189
		1708	0.00212729
		1710	0.0021425
		1712	0.00215584
		1714	0.00216573
		1716	0.00217077
		1718	0.00216982
		1720	0.00216214
		1722	0.00214743
		1724	0.00212573
		1726	0.00209756
		1728	0.00206379
		1730	0.00202557
		1732	0.00198424
		1734	0.00194118
		1736	0.00189777
		1738	0.00185524
		1740	0.00181458
		1742	0.00177661
		1744	0.00174181
		1746	0.00171043
		1748	0.00168249
		1750	0.00165782
		1752	0.00163613
		1754	0.00161705
		1756	0.00160019
		1758	0.00158513
		1760	0.0015715
		1762	0.00155894
		1764	0.00154713
		1766	0.00153571
		1768	0.00152434
		1770	0.00151261
		1772	0.00150004
		1774	0.0014861
		1776	0.0014702
		1778	0.00145172
		1780	0.00143005
		1782	0.00140462
		1784	0.00137505
		1786	0.00134105
		1788	0.00130261
		1790	0.0012599
		1792	0.00121334
		1794	0.00116358
		1796	0.00111139
		1798	0.0010577
		1800	0.00100344
		1802	0.000949516
		1804	0.000896719
		1806	0.000845714
		1808	0.000796993
		1810	0.000750861
		1812	0.000707469
		1814	0.00066679
		1816	0.000628671
		1818	0.000592907
		1820	0.000559234
		1822	0.000527409
		1824	0.00049718
		1826	0.000468346
		1828	0.000440763
		1830	0.000414354
		1832	0.000389039
		1834	0.000364895
		1836	0.000341921
		1838	0.000320198
		1840	0.000299803
		1842	0.000280826
		1844	0.000263392
		1846	0.000247541
		1848	0.000233369
		1850	0.000220912
		1852	0.000210211
		1854	0.000201295
		1856	0.000194163
		1858	0.000188863
		1860	0.000185361
		1862	0.000183678
		1864	0.00018379
		1866	0.000185684
		1868	0.000189338
		1870	0.000194723
		1872	0.000201813
		1874	0.000210533
		1876	0.000220812
		1878	0.000232586
		1880	0.000245732
		1882	0.000260098
		1884	0.00027555
		1886	0.00029193
		1888	0.000309011
		1890	0.000326566
		1892	0.000344386
		1894	0.000362221
		1896	0.000379835
		1898	0.000396995
		1900	0.000413486
		1902	0.000429116
		1904	0.000443708
		1906	0.00045716
		1908	0.000469381
		1910	0.000480278
		1912	0.000489904
		1914	0.000498271
		1916	0.000505457
		1918	0.000511554
		1920	0.000516747
		1922	0.000521174
		1924	0.000525014
		1926	0.000528451
		1928	0.000531671
		1930	0.000534848
		1932	0.000538145
		1934	0.000541707
		1936	0.00054564
		1938	0.000550064
		1940	0.000555032
		1942	0.000560586
		1944	0.000566738
		1946	0.000573477
		1948	0.000580767
		1950	0.000588556
		1952	0.00059677
		1954	0.000605326
		1956	0.000614126
		1958	0.000623064
		1960	0.00063203
		1962	0.000640909
		1964	0.000649584
		1966	0.000657937
		1968	0.000665853
		1970	0.000673218
		1972	0.000679923
		1974	0.000685864
		1976	0.000690941
		1978	0.000695064
		1980	0.000698138
		1982	0.000700115
		1984	0.000700919
		1986	0.000700499
		1988	0.000698819
		1990	0.000695854
		1992	0.000691595
		1994	0.000686047
		1996	0.000679232
		1998	0.000671185
		2000	0.000661956
		2002	0.00065161
		2004	0.000640203
		2006	0.000627859
		2008	0.000614672
		2010	0.000600736
		2012	0.000586164
		2014	0.000571072
		2016	0.000555578
		2018	0.000539798
		2020	0.000523847
		2022	0.000507835
		2024	0.000491864
		2026	0.00047603
		2028	0.000460418
		2030	0.000445104
		2032	0.00043015
		2034	0.00041561
		2036	0.000401524
		2038	0.000387922
		2040	0.00037482
		2042	0.000362226
		2044	0.000350138
		2046	0.000338546
		2048	0.000327429
		2050	0.000316764
		2052	0.000306521
		2054	0.000296666
		2056	0.000287163
		2058	0.000277976
		2060	0.000269067
		2062	0.000260399
		2064	0.000251938
		2066	0.000243651
		2068	0.000235509
		2070	0.000227488
		2072	0.000219554
		2074	0.000211714
		2076	0.00020394
		2078	0.000196225
		2080	0.000188563
		2082	0.000180952
		2084	0.000173395
		2086	0.000165898
		2088	0.000158458
		2090	0.000151108
		2092	0.000143847
		2094	0.000136691
		2096	0.000129653
		2098	0.000122748
		2100	0.000115993
		2102	0.000109401
		2104	0.000102987
		2106	9.67651e-05
		2108	9.0763e-05
		2110	8.4966e-05
		2112	7.93954e-05
		2114	7.40599e-05
		2116	6.89665e-05
		2118	6.41205e-05
		2120	5.95147e-05
		2122	5.51777e-05
		2124	5.10956e-05
		2126	4.72692e-05
		2128	4.36983e-05
		2130	4.0382e-05
		2132	3.73192e-05
		2134	3.45087e-05
		2136	3.19496e-05
		2138	2.96323e-05
		2140	2.7568e-05
		2142	2.57678e-05
		2144	2.42228e-05
		2146	2.29377e-05
		2148	2.1919e-05
		2150	2.11753e-05
		2152	2.07172e-05
		2154	2.05574e-05
		2156	2.07106e-05
		2158	2.11933e-05
		2160	2.20236e-05
		2162	2.32208e-05
		2164	2.48049e-05
		2166	2.67856e-05
		2168	2.92046e-05
		2170	3.20674e-05
		2172	3.53893e-05
		2174	3.91823e-05
		2176	4.34536e-05
		2178	4.82051e-05
		2180	5.34318e-05
		2182	5.91211e-05
		2184	6.5252e-05
		2186	7.17942e-05
		2188	7.87076e-05
		2190	8.59424e-05
		2192	9.34384e-05
		2194	0.000101126
		2196	0.000108926
		2198	0.000116753
		2200	0.000124512
		2202	0.000132105
		2204	0.000139429
		2206	0.000146382
		2208	0.00015286
		2210	0.000158767
		2212	0.000164007
		2214	0.000168487
		2216	0.000172154
		2218	0.000174935
		2220	0.000176769
		2222	0.000177649
		2224	0.000177545
		2226	0.000176456
		2228	0.000174399
		2230	0.000171408
		2232	0.00016753
		2234	0.000162828
		2236	0.000157375
		2238	0.000151257
		2240	0.000144567
		2242	0.000137401
		2244	0.000129861
		2246	0.000122051
		2248	0.000114071
		2250	0.000106017
		2252	9.79831e-05
		2254	9.00531e-05
		2256	8.23038e-05
		2258	7.48028e-05
		2260	6.76072e-05
		2262	6.07645e-05
		2264	5.43113e-05
		2266	4.82745e-05
		2268	4.26716e-05
		2270	3.75108e-05
		2272	3.27928e-05
		2274	2.85111e-05
		2276	2.4653e-05
		2278	2.12011e-05
		2280	1.81339e-05
		2282	1.54272e-05
		2284	1.30547e-05
		2286	1.09887e-05
		2288	9.20158e-06
		2290	7.66557e-06
		2292	6.35382e-06
		2294	5.24064e-06
		2296	4.30185e-06
		2298	3.51496e-06
		2300	2.85939e-06
		2302	2.31646e-06
		2304	1.86943e-06
		2306	1.50346e-06
		2308	1.20551e-06
		2310	9.64247e-07
		2312	7.6989e-07
		2314	6.14091e-07
		2316	4.89777e-07
		2318	3.91006e-07
		2320	3.12829e-07
		2322	2.51152e-07
		2324	2.0262e-07
		2326	1.64498e-07
		2328	1.34578e-07
		2330	1.11088e-07
		2332	9.26142e-08
		2334	7.80395e-08
		2336	6.64849e-08
		2338	5.72635e-08
		2340	3.84223e-08
		2342	3.56183e-08
		2344	3.30057e-08
		2346	3.05725e-08
		2348	2.83072e-08
		2350	2.61993e-08
		2352	2.42386e-08
		2354	2.24156e-08
		2356	2.07214e-08
		2358	1.91476e-08
		2360	1.76862e-08
		2362	1.63298e-08
		2364	1.50713e-08
		2366	1.39042e-08
		2368	1.28224e-08
		2370	1.182e-08
		2372	0
		2374	0
		2376	0
		2378	0
		2380	0
		2382	0
		2384	0
		2386	0
		2388	0
		2390	0
		2392	0
		2394	0
		2396	0
		2398	0
		2400	0
		2402	0
		2404	0
		2406	0
		2408	0
		2410	0
		2412	0
		2414	0
		2416	0
		2418	0
		2420	0
		2422	0
		2424	0
		2426	0
		2428	0
		2430	0
		2432	0
		2434	0
		2436	0
		2438	0
		2440	0
		2442	0
		2444	0
		2446	0
		2448	0
		2450	0
		2452	0
		2454	0
		2456	0
		2458	0
		2460	0
		2462	1.34281e-08
		2464	1.72364e-08
		2466	2.20492e-08
		2468	2.81094e-08
		2470	3.57129e-08
		2472	4.5218e-08
		2474	7.19541e-08
		2476	9.39289e-08
		2478	1.22661e-07
		2480	1.60233e-07
		2482	2.09354e-07
		2484	2.73529e-07
		2486	3.57266e-07
		2488	4.66337e-07
		2490	6.08069e-07
		2492	7.91701e-07
		2494	1.02878e-06
		2496	1.33362e-06
		2498	1.72376e-06
		2500	2.22053e-06
		2502	2.84954e-06
		2504	3.64118e-06
		2506	4.63112e-06
		2508	5.86061e-06
		2510	7.37674e-06
		2512	9.23246e-06
		2514	1.14863e-05
		2516	1.42018e-05
		2518	1.74466e-05
		2520	2.1291e-05
		2522	2.58064e-05
		2524	3.10626e-05
		2526	3.71253e-05
		2528	4.40531e-05
		2530	5.18938e-05
		2532	6.0681e-05
		2534	7.04302e-05
		2536	8.11357e-05
		2538	9.27671e-05
		2540	0.000105267
		2542	0.000118549
		2544	0.000132499
		2546	0.000146972
		2548	0.000161796
		2550	0.000176778
		2552	0.000191704
		2554	0.000206346
		2556	0.00022047
		2558	0.000233844
		2560	0.000246244
		2562	0.000257463
		2564	0.000267317
		2566	0.000275654
		2568	0.000282359
		2570	0.000287355
		2572	0.00029061
		2574	0.000292134
		2576	0.000291978
		2578	0.000290234
		2580	0.000287024
		2582	0.000282501
		2584	0.000276837
		2586	0.000270219
		2588	0.000262839
		2590	0.000254886
		2592	0.000246544
		2594	0.000237981
		2596	0.000229346
		2598	0.000220769
		2600	0.000212354
		2602	0.00020418
		2604	0.000196304
		2606	0.000188758
		2608	0.000181556
		2610	0.000174693
		2612	0.000168151
		2614	0.000161901
		2616	0.000155906
		2618	0.000150128
		2620	0.000144525
		2622	0.000139057
		2624	0.000133688
		2626	0.000128388
		2628	0.00012313
		2630	0.000117897
		2632	0.000112676
		2634	0.000107475
		2636	0.000102271
		2638	9.70809e-05
		2640	9.19136e-05
		2642	8.67835e-05
		2644	8.1707e-05
		2646	7.67026e-05
		2648	7.17896e-05
		2650	6.69878e-05
		2652	6.23167e-05
		2654	5.77947e-05
		2656	5.34394e-05
		2658	4.92663e-05
		2660	4.52894e-05
		2662	4.15207e-05
		2664	3.79703e-05
		2666	3.46352e-05
		2668	3.15478e-05
		2670	2.86968e-05
		2672	2.60858e-05
		2674	2.37171e-05
		2676	2.1592e-05
		2678	1.97109e-05
		2680	1.80738e-05
		2682	1.66804e-05
		2684	1.55303e-05
		2686	1.46232e-05
		2688	1.39593e-05
		2690	1.35391e-05
		2692	1.33639e-05
		2694	1.34355e-05
		2696	1.37563e-05
		2698	1.43294e-05
		2700	1.51584e-05
		2702	1.62473e-05
		2704	1.76005e-05
		2706	1.92222e-05
		2708	2.11166e-05
		2710	2.32873e-05
		2712	2.5737e-05
		2714	2.84674e-05
		2716	3.14786e-05
		2718	3.47689e-05
		2720	3.83345e-05
		2722	4.21688e-05
		2724	4.62626e-05
		2726	5.06033e-05
		2728	5.51753e-05
		2730	5.99591e-05
		2732	6.49317e-05
		2734	7.00664e-05
		2736	7.53329e-05
		2738	8.06972e-05
		2740	8.6122e-05
		2742	9.15672e-05
		2744	9.69898e-05
		2746	0.000102345
		2748	0.000107585
		2750	0.000112664
		2752	0.000117532
		2754	0.000122143
		2756	0.00012645
		2758	0.000130398
		2760	0.000133968
		2762	0.000137108
		2764	0.000139784
		2766	0.000141967
		2768	0.00014363
		2770	0.000144757
		2772	0.000145333
		2774	0.000145352
		2776	0.000144814
		2778	0.000143726
		2780	0.000142111
		2782	0.000139972
		2784	0.000137341
		2786	0.00013425
		2788	0.000130737
		2790	0.000126843
		2792	0.000122617
		2794	0.000118112
		2796	0.000113386
		2798	0.000108501
		2800	0.000103527
		2802	9.85372e-05
		2804	9.36132e-05
		2806	8.88429e-05
		2808	8.43222e-05
		2810	8.01551e-05
		2812	7.64545e-05
		2814	7.33415e-05
		2816	7.09448e-05
		2818	6.9399e-05
		2820	6.88415e-05
		2822	6.94089e-05
		2824	7.12313e-05
		2826	7.44258e-05
		2828	7.90887e-05
		2830	8.5287e-05
		2832	9.30493e-05
		2834	0.000102357
		2836	0.000113136
		2838	0.000125254
		2840	0.00013851
		2842	0.000152641
		2844	0.000167325
		2846	0.000182182
		2848	0.000196795
		2850	0.000210737
		2852	0.000223533
		2854	0.000234758
		2856	0.000244013
		2858	0.000250957
		2860	0.000255325
		2862	0.000256942
		2864	0.000255737
		2866	0.000251745
		2868	0.000245109
		2870	0.000236074
		2872	0.000224974
		2874	0.000212217
		2876	0.000198268
		2878	0.000183631
		2880	0.000168822
		2882	0.000154359
		2884	0.000140734
		2886	0.000128408
		2888	0.00011779
		2890	0.000109229
		2892	0.00010301
		2894	9.93417e-05
		2896	9.83565e-05
		2898	0.000100105
		2900	0.000104555
		2902	0.000111587
		2904	0.000120999
		2906	0.000132505
		2908	0.000145739
		2910	0.000160264
		2912	0.000175582
		2914	0.000191141
		2916	0.000206393
		2918	0.000220747
		2920	0.000233647
		2922	0.000244578
		2924	0.000253093
		2926	0.000258835
		2928	0.000261553
		2930	0.000261115
		2932	0.000257513
		2934	0.000250864
		2936	0.000241394
		2938	0.000229433
		2940	0.000215386
		2942	0.000199711
		2944	0.000182899
		2946	0.000165429
		2948	0.000147797
		2950	0.000130416
		2952	0.000113661
		2954	9.78376e-05
		2956	8.3179e-05
		2958	6.9845e-05
		2960	5.79256e-05
		2962	4.74482e-05
		2964	3.83869e-05
		2966	3.06733e-05
		2968	2.42076e-05
		2970	1.88693e-05
		2972	1.45269e-05
		2974	1.1046e-05
		2976	8.29568e-06
		2978	6.15335e-06
		2980	4.50802e-06
		2982	3.26192e-06
		2984	2.33117e-06
		2986	1.64547e-06
		2988	1.14714e-06
		2990	7.89879e-07
		2992	5.37177e-07
		2994	3.60817e-07
		2996	2.39371e-07
		2998	1.56845e-07
		3000	1.01504e-07
		3002	6.48794e-08
		3004	4.09587e-08
		3006	2.55387e-08
		3008	1.57277e-08
		3010	0
		3012	0
		3014	0
		3016	0
		3018	0
		3020	0
		3022	0
		3024	0
		3026	0
		3028	0
		3030	0
		3032	0
		3034	0
		3036	0
		3038	0
		3040	0
		3042	0
		3044	0
		3046	0
		3048	0
		3050	0
		3052	0
		3054	0
		3056	0
		3058	0
		3060	0
		3062	0
		3064	0
		3066	0
		3068	0
		3070	0
		3072	0
		3074	0
		3076	0
		3078	0
		3080	0
		3082	0
		3084	0
		3086	0
		3088	0
		3090	0
		3092	0
		3094	0
		3096	0
		3098	0
		3100	0
		3102	0
		3104	0
		3106	0
		3108	0
		3110	0
		3112	0
		3114	0
		3116	0
		3118	0
		3120	0
		3122	0
		3124	0
		3126	0
		3128	0
		3130	0
		3132	0
		3134	0
		3136	0
		3138	0
		3140	0
		3142	0
		3144	0
		3146	0
		3148	0
		3150	0
		3152	0
		3154	0
		3156	0
		3158	0
		3160	0
		3162	0
		3164	0
		3166	0
		3168	0
		3170	0
		3172	0
		3174	0
		3176	0
		3178	0
		3180	0
		3182	0
		3184	0
		3186	0
		3188	0
		3190	0
		3192	0
		3194	0
		3196	0
		3198	0
		3200	0
		3202	0
		3204	0
		3206	0
		3208	0
		3210	0
		3212	0
		3214	0
		3216	0
		3218	0
		3220	0
		3222	0
		3224	0
		3226	0
		3228	0
		3230	0
		3232	0
		3234	0
		3236	0
		3238	0
		3240	0
		3242	0
		3244	0
		3246	0
		3248	0
		3250	0
		3252	0
		3254	0
		3256	0
		3258	0
		3260	0
		3262	0
		3264	0
		3266	0
		3268	0
		3270	0
		3272	0
		3274	0
		3276	0
		3278	0
		3280	0
		3282	0
		3284	0
		3286	0
		3288	0
		3290	0
		3292	0
		3294	0
		3296	0
		3298	0
		3300	0
		3302	0
		3304	0
		3306	0
		3308	0
		3310	0
		3312	0
		3314	0
		3316	0
		3318	0
		3320	0
		3322	0
		3324	0
		3326	0
		3328	0
		3330	0
		3332	0
		3334	0
		3336	0
		3338	0
		3340	0
		3342	0
		3344	0
		3346	0
		3348	0
		3350	0
		3352	0
		3354	0
		3356	0
		3358	0
		3360	0
		3362	0
		3364	0
		3366	0
		3368	0
		3370	0
		3372	0
		3374	0
		3376	0
		3378	0
		3380	0
		3382	0
		3384	0
		3386	0
		3388	0
		3390	0
		3392	0
		3394	0
		3396	0
		3398	0
		3400	0
		3402	0
		3404	0
		3406	0
		3408	0
		3410	0
		3412	0
		3414	0
		3416	0
		3418	0
		3420	0
		3422	0
		3424	0
		3426	0
		3428	0
		3430	0
		3432	0
		3434	0
		3436	0
		3438	0
		3440	0
		3442	0
		3444	0
		3446	0
		3448	0
		3450	0
		3452	0
		3454	0
		3456	0
		3458	0
		3460	0
		3462	0
		3464	0
		3466	0
		3468	0
		3470	0
		3472	0
		3474	0
		3476	0
		3478	0
		3480	0
		3482	0
		3484	0
		3486	0
		3488	0
		3490	0
		3492	0
		3494	0
		3496	0
		3498	0
		3500	0
		3502	0
		3504	0
		3506	0
		3508	0
		3510	0
		3512	0
		3514	0
		3516	0
		3518	0
		3520	0
		3522	0
		3524	0
		3526	0
		3528	0
		3530	0
		3532	0
		3534	0
		3536	0
		3538	0
		3540	0
		3542	0
		3544	0
		3546	0
		3548	0
		3550	0
		3552	0
		3554	0
		3556	0
		3558	0
		3560	0
		3562	0
		3564	0
		3566	0
		3568	0
		3570	0
		3572	0
		3574	0
		3576	0
		3578	0
		3580	0
		3582	0
		3584	0
		3586	0
		3588	0
		3590	0
		3592	0
		3594	0
		3596	0
		3598	0
		3600	0
		3602	0
		3604	0
		3606	0
		3608	0
		3610	0
		3612	0
		3614	0
		3616	0
		3618	0
		3620	0
		3622	0
		3624	0
		3626	0
		3628	0
		3630	0
		3632	0
		3634	0
		3636	0
		3638	0
		3640	0
		3642	0
		3644	0
		3646	0
		3648	0
		3650	0
		3652	0
		3654	0
		3656	0
		3658	0
		3660	0
		3662	0
		3664	0
		3666	0
		3668	0
		3670	0
		3672	0
		3674	0
		3676	0
		3678	0
		3680	0
		3682	0
		3684	0
		3686	0
		3688	0
		3690	0
		3692	0
		3694	0
		3696	0
		3698	0
		3700	0
		3702	0
		3704	0
		3706	0
		3708	1.58008e-08
		3710	3.65154e-08
		3712	8.14245e-08
		3714	1.75193e-07
		3716	3.63715e-07
		3718	7.28597e-07
		3720	1.4083e-06
		3722	2.62657e-06
		3724	4.72675e-06
		3726	8.20765e-06
		3728	1.37517e-05
		3730	2.2232e-05
		3732	3.46803e-05
		3734	5.21999e-05
		3736	7.58121e-05
		3738	0.000106241
		3740	0.000143656
		3742	0.000187431
		3744	0.000235961
		3746	0.000286629
		3748	0.000335958
		3750	0.000379954
		3752	0.000414629
		3754	0.000436587
		3756	0.000443572
		3758	0.000434851
		3760	0.000411339
		3762	0.00037544
		3764	0.000330647
		3766	0.000280977
		3768	0.000230387
		3770	0.000182276
		3772	0.00013915
		3774	0.000102499
		3776	7.28514e-05
		3778	4.99619e-05
		3780	3.30615e-05
		3782	2.111e-05
		3784	1.30058e-05
		3786	7.73157e-06
		3788	4.43487e-06
		3790	2.45458e-06
		3792	1.31086e-06
		3794	6.75485e-07
		3796	3.35861e-07
		3798	1.61133e-07
		3800	7.45921e-08
		3802	3.33184e-08
		3804	1.43601e-08
		3806	0
		3808	0
		3810	0
		3812	0
		3814	0
		3816	0
		3818	0
		3820	0
		3822	0
		3824	0
		3826	0
		3828	0
		3830	0
		3832	0
		3834	0
		3836	0
		3838	0
		3840	0
		3842	0
		3844	0
		3846	0
		3848	0
		3850	0
		3852	0
		3854	0
		3856	0
		3858	0
		3860	0
		3862	0
		3864	0
		3866	0
		3868	0
		3870	0
		3872	0
		3874	0
		3876	0
		3878	0
		3880	0
		3882	0
		3884	0
		3886	0
		3888	0
		3890	0
		3892	0
		3894	0
		3896	0
		3898	0
		3900	0
		3902	0
		3904	0
		3906	0
		3908	0
		3910	0
		3912	0
		3914	0
		3916	0
		3918	0
		3920	0
		3922	0
		3924	0
		3926	0
		3928	0
		3930	0
		3932	0
		3934	0
		3936	0
		3938	0
		3940	0
		3942	0
		3944	0
		3946	0
		3948	0
		3950	0
		3952	0
		3954	0
		3956	0
		3958	0
		3960	0
		3962	0
		3964	0
		3966	0
		3968	0
		3970	0
		3972	0
		3974	0
		3976	0
		3978	0
		3980	0
		3982	0
		3984	0
		3986	0
		3988	0
		3990	0
		3992	0
		3994	0
		3996	0
		3998	0
[truncated: 1 more rows]

## Sheet: 0-Mississippian
AZ Shelf 0		BC05		Surprise Canyon3- 06GC149		Surprise_Cyn2		SurpriseC_Cngl		Princeton		Bluestone		24PL09		10JM94		40JM94		05PL15		09LB04		Hinton		Mauch_Chunk		KY-21-SG		Tonka		Stanley		Hot_spring		09-CM-699		O_M source		Central Appalachian	updated 2-26-2019	N_Appalachian	updated 11-19-18	NW Arctic	updated 2-26-19	NE.Arctic	updated 2-26-19	Sonora_
309.368	7.71291	515.163	8.48571	309.368	7.71291	393.483	10.8877	380.617	9.90887	406.158	7.20338	470.584	11.7539	550	28	1445	16	1796	31	1102	37	2643	9	391.896	6.53981	393.246	6.18017	372.2	7	1764.36	28.2959	336	6.9	373.1	7.8	380.031	10.3853	1104.7	15.5	1011.5	6.1	2393	49	374.2	3.73	1764	34	1012.79	28.2871
451.148	11.971	1107.19	12.4625	451.148	11.971	422.618	17.4521	410.148	10.4969	453.752	4.38151	658.263	6.2577	1031	92	1770	30	1746	25	1476	13	1971	9	399.237	4.29711	400.919	5.63625	376.2	5.5	1852.48	10.9098	365.3	9.6	413.7	7.9	381.3	14.297	1105	16.8	1160.7	8.6	1966	40	384	6.68	2834	18	1017.65	31.9308
460.715	13.6463	1126.68	12.2737	460.715	13.6463	424.187	11.7707	410.863	11.3781	460.843	12.1419	701.457	10.2355	1757	54	1802	45	1776	20	1744	13	1833	32	401.652	8.52777	401.374	3.89134	378	6.5	1784.33	11.0539	436.1	8.7	417.6	8.3	389.979	11.8658	1106.2	17.4	1079.3	7.7	2680	46	404.5	3.85	1799	19	1053.16	45.6207
465.067	11.4812	1136.03	18.7233	465.067	11.4812	432.819	21.0227	411.66	33.1236	476.387	13.8223	908.978	39.8975	1807	55	1803	31	1765	30	1748	18	1786	7	410.057	3.97288	407.914	4.03182	378.6	6.4	1964.25	19.6398	468.5	9.2	421.7	9.4	392.928	8.78331	1107.2	19.3	989	6.8	2573	42	428.5	4.54	2020	19	1069.35	27.2658
613.889	9.25103	1143.81	16.1854	613.889	9.25103	450.187	26.0189	412.307	9.39053	476.601	5.78856	959.355	88.9258	1815	11	1684	18	1761	32	1760	11	2020	6	418.863	4.05545	413.728	4.00731	382.2	7.3	1962.55	14.173	474.4	9.5	422.5	10.7	406.663	16.2216	1107.4	15.1	1117.9	4.3	2798	48	431.9	6.61	1207	25	1069.46	28.3156
630.312	9.80372	1152.39	17.7889	630.312	9.80372	460.648	19.4053	412.878	7.23243	476.897	8.18238	962.564	52.9503	1824	14	1868	26	1861	22	1763	15	1851	27	423.218	4.09625	450.806	4.5282	388.3	5	1775.22	8.72235	476.5	8.8	422.6	7.8	414.138	12.9395	1116.7	19.8	1110.8	4.7	1494	25	434.6	2.38	1667	19	1070.22	91.452
634.063	9.71599	1192.98	23.7511	634.063	9.71599	464.389	12.0079	418.951	12.4627	479.269	10.3925	974.712	69.1829	1825	30	1785	37	1834	25	1766	15	1827	68	423.998	4.10355	453.681	10.6455	394.7	6.8	2041.61	11.9861	482.9	10	426.6	7.9	432.404	5.91684	1117.3	14.3	1210.9	9.2	1781	29	437.5	5.38	1723	21	1080.03	71.5127
641.949	14.7661	1337.61	19.1774	641.949	14.7661	478.957	15.5397	425.36	12.4572	487.504	5.30566	984.463	61.777	1825	35	1821	41	1883	20	1767	14	2791	14	426.793	4.12971	457.396	7.24136	397.9	10.2	2626.17	7.42233	483.1	11.1	433.4	9.1	441.905	9.01204	1118.6	15.8	1140.9	7.9	979	20	443	3.47	1786	21	1082.69	34.4739
773.974	16.2783	1347.92	15.2605	773.974	16.2783	707.45	61.3779	426.668	6.11531	555.873	6.17794	992.907	51.1515	1831	72	1821	23	1841	29	1768	12	2571	14	428.654	4.31302	458.479	6.72684	404.9	8.6	2479.08	14.5054	486.1	9.1	434.8	7.1	447.078	8.89872	1124.5	13.9	1427	5.2	3089	50	443.5	10.22	2476	26	1085.16	28.2556
1037.45	29.5517	1358.65	13.1	1037.45	29.5517	947.205	68.1073	434.44	23.19	592.358	9.96085	993.878	73.5199	1831	38	1884	24	1833	26	1770	13	1849	44	441.008	4.26262	461.141	4.45033	417.3	7.4	2075.97	7.25785	486.3	16.1	449.8	9.5	449.515	9.36619	1125.4	18.1	1178.3	24.4	1766	29	445.4	5.54	1396	43	1086.04	39.1575
1038.74	36.9269	1363.03	16.2777	1038.74	36.9269	954.905	14.974	436.491	23.1536	976.211	22.354	995.089	38.249	1833	29	1765	44	1943	28	1771	14	1875	20	453.155	5.33866	463.422	20.4351	418.5	7	2717.45	7.47601	501.1	7.6	457.1	14.9	449.75	12.211	1129.1	15.6	1100.6	10.6	1249	31	462.4	8.87	1763	22	1089.28	61.0969
1048.29	22.1634	1363.78	16.6787	1048.29	22.1634	978.622	75.5579	439.697	12.7906	992.58	57.0385	1000.81	34.7293	1834	29	1778	22	1793	33	1774	13	2689	9	549.407	8.53168	477.219	4.59984	419.5	11.8	2085.98	10.9405	507.4	9.8	463.4	8.5	450.873	9.6268	1130.6	17.4	991.9	2.9	1044	26	483.5	4.51	1090	68	1090.59	56.3452
1076.83	14.7294	1365.51	14.9987	1076.83	14.7294	981.507	25.5894	447.677	9.43051	998.833	97.4792	1005.44	52.9054	1836	22	1666	23	1920	21	1784	13	2084	10	591.552	7.85665	490.213	6.75014	421.2	9.3	1954.28	44.2302	522.1	10.5	483.8	7.2	460.656	10.3974	1131.4	17.8	1002.9	28	1308	31	533.5	9.88	1131	37	1094.99	50.4371
1083.82	13.0536	1371.92	15.8002	1083.82	13.0536	982.127	35.1163	464.063	17.5481	1000.17	20.3381	1017.07	41.7669	1836	33	1830	21	1792	21	1788	13	1849	9	998.638	96.3341	539.927	5.23114	421.8	7.2	1907.19	23.6311	530.3	12.2	551	14.4	461.388	10.0439	1135.2	18.6	1146.9	11.2	1889	33	536.7	11.29	2432	18	1099.42	56.6769
1089.47	24.5493	1375.5	14.914	1089.47	24.5493	984.429	68.0656	470.249	29.5072	1000.97	52.2255	1018.65	24.7181	1837	20	1844	20	1844	46	1798	11	1791	11	1006.16	26.7985	876.007	73.8691	424.2	9.5	1954.56	12.2166	534.1	8.5	766.8	12.8	464.634	7.53304	1138.1	14.1	1089.1	9.3	925	22	538.6	12.3	1646	37	1102.19	35.6841
1100.43	17.7726	1389.95	18.0948	1100.43	17.7726	996.04	57.3543	476.335	16.2498	1003.54	30.473	1031.52	59.9326	1838	27	1837	31	1880	34	1799	12	1998	11	1010.64	86.314	939.007	58.2996	424.9	7.8	1844.71	14.8957	534.3	11.6	904.7	21.9	471.305	27.9037	1141.6	13.6	1007.7	8.9	963	23	551.4	7.58	1271	24	1102.75	58.9888
1102.32	22.8857	1392.39	14.9822	1102.32	22.8857	1008.1	44.2646	479.42	12.4049	1012.77	91.9022	1034.11	28.4323	1838	13	1861	23	1895	25	1802	14	1647	24	1029.03	20.2516	943.82	56.6019	425.2	6.9	1870.44	32.7896	537.5	11.4	993.5	19.1	476.533	10.8771	1144.9	18.6	1184.3	4.1	976	19	556.8	7.64	1306	21	1105.22	27.706
1116.16	49.7305	1410.53	17.3761	1116.16	49.7305	1010.16	25.195	479.528	25.8671	1013.77	51.9911	1034.2	41.131	1839	29	1786	29	1900	22	1804	9	1801	15	1036.33	24.2566	954.074	23.9487	426.6	4.6	1824.72	24.772	538.4	13.8	997.6	18.5	481.767	7.70527	1147.8	15.2	1119.9	11.2	2540	43	578.1	7.58	1754	35	1105.86	34.5933
1125.5	31.635	1412.59	14.6596	1125.5	31.635	1012.39	16.45	484.767	27.9993	1014.6	48.082	1036.6	33.3741	1840	9	1808	25	1855	20	1808	14	1696	19	1042.29	56.1068	960.138	37.4278	427.3	6.8	1923.29	23.4633	541.6	10.1	999.4	15.4	488.438	19.8479	1148.3	19.8	1036.4	4.9	2584	41	585.3	3.8	1641	24	1106.67	24.1985
1146.75	9.97173	1418.66	14.2743	1146.75	9.97173	1013.38	78.7329	538.343	28.2103	1017.67	51.3666	1037.09	34.6249	1841	12	1853	41	1809	27	1810	12	1775	12	1046.42	26.0348	961.811	53.8681	430.4	15.2	1795.5	13.484	542.2	9.9	1007	25.7	539.558	4.76308	1148.7	17.5	1117.7	8.2	996	18	610.7	12.26	2938	16	1112.08	25.3705
1159.04	39.0374	1420.28	17.3722	1159.04	39.0374	1015.01	51.1904	547.946	20.3159	1020.34	30.3925	1042.3	42.0084	1842	9	1869	23	1806	32	1811	14	1935	5	1047.62	31.0947	989.541	34.5157	431.9	6.5	1811.68	13.1278	547.6	14.8	1019.3	15.8	553.244	20.5181	1159.7	23.8	1107.3	13.1	1275	37	640.7	10.19	2397	33	1112.34	39.1473
1161.53	60.1196	1422	12.1641	1161.53	60.1196	1017.43	35.4819	569.627	15.974	1022.08	22.4718	1042.47	52.2315	1843	49	1750	34	1841	20	1816	17	1778	14	1047.76	82.3089	1001.19	76.3086	432.7	11.1	1776.73	18.4234	548.2	9.1	1023.8	27	588.093	23.1805	1188.3	23.5	1018.3	5.5	1036	19	640.8	7.2	1945	23	1113.5	44.0246
1194.91	50.7764	1424.25	18.6548	1194.91	50.7764	1021.85	63.258	624.283	22.2548	1024.75	43.2252	1043.85	25.0193	1845	16	1838	25	1852	23	1817	15	1904	17	1049.19	30.2516	1010.09	48.8776	433.9	8.9	1830.94	47.1306	549	12.8	1028.5	18.3	769.48	20.052	1188.3	19.3	1059.7	6.6	1598	29	648.4	3.64	3184	16	1116.14	34.3496
1197.93	35.2674	1426.33	14.2743	1197.93	35.2674	1026.72	41.0668	725.689	17.2048	1025.15	87.9005	1044.7	39.5456	1845	7	1868	35	1809	39	1820	16	1808	7	1049.87	27.2261	1021.4	31.6219	448.9	10.3	2655.63	9.97236	557.9	9.7	1028.9	18.9	821.544	11.2986	1324.8	13.1	951.6	12.2	2351	36	657	7.28	1162	24	1116.85	22.2465
1205.34	35.7146	1427.94	12.385	1205.34	35.7146	1029.04	58.0535	739.766	15.2882	1028.27	29.8951	1048.28	29.8595	1845	8	1849	23	1874	34	1820	12	2014	15	1055.06	65.7348	1022.7	20.2398	451	6.9	2525.53	2.6115	570.4	13.5	1031.5	18.6	898.805	109.218	1332.4	13.4	1029.3	10.5	1058	25	673.5	10.42	2736	17	1117.49	35.3494
1251.24	49.045	1429.74	15.203	1251.24	49.045	1032.65	79.0391	868.195	30.2264	1034.28	35.9089	1049.56	31.6737	1846	11	1885	32	1790	24	1820	15	2679	9	1055.43	30.2581	1030.05	49.1647	455.4	11.2	2043.51	26.699	574.9	10.2	1037.2	18.1	936.707	62.3268	1333	13.7	981.1	6	1957	38	684.3	15.18	1643	17	1117.64	67.42
1280.93	57.8715	1430.42	13.9373	1280.93	57.8715	1033.44	14.6214	946.007	59.6887	1038.31	22.0245	1049.56	39.11	1851	86	1850	26	1964	26	1832	17	1841	8	1068.39	23.5592	1031.89	20.2185	455.9	9.8	2554.7	24.0331	589.2	9.6	1038.9	17.2	951.495	52.9176	1340.3	20.7	1139.2	8.9	2548	43	688	17.12	1208	32	1117.81	26.6429
1343.9	33.8766	1431.11	12.849	1343.9	33.8766	1033.59	27.5093	946.541	16.5675	1038.68	46.6639	1055.26	30.4919	1852	22	1882	23	2187	31	1833	13	1971	41	1070.87	76.5608	1046.09	20.226	455.9	8.3	1134.65	57.6835	590.2	12.9	1043.7	20.7	976.449	109.403	1343.7	15.5	1130.7	7.1	1813	36	693.3	6.62	1775	18	1120.38	11.5449
1370.29	43.3861	1437.53	13.1188	1370.29	43.3861	1040.11	52.2986	959.055	80.8996	1038.87	20.8264	1055.39	40.0823	1853	27	1860	25	2133	28	1838	13	1900	39	1075.4	34.8477	1047.15	64.9579	456.9	8.7	1851.35	10.0014	597.6	11.1	1045.8	12.9	983.857	72.2911	1345.8	17	1160.9	6.1	1227	29	716.8	14.38	1074	88	1120.47	26.9464
1413.97	66.302	1457.59	15.0884	1413.97	66.302	1041.47	77.8515	961.665	64.5879	1040.92	32.6444	1059.72	20.1603	1853	38	1800	44	1984	24	1838	12	1789	20	1076.11	23.0659	1048.76	37.7297	458.7	11.3	2762.58	3.94686	601.9	15.4	1048.6	18.6	997.377	24.2074	1351.2	15.7	1421.1	9.2	987	19	762.3	4.42	1742	18	1121.02	25.8532
1419.62	14.394	1623.23	13.9763	1419.62	14.394	1043.03	30.7405	962.569	38.5786	1043.91	27.1858	1061.35	20.1428	1855	20	1898	26	2146	26	1840	14	1868	15	1083.12	31.1811	1052.28	29.6603	461.5	9.3	1957.35	13.8448	617.7	11.8	1049.4	17.1	1002.65	51.3275	1351.4	15	1153	3.9	1784	32	838.2	12.25	1847	21	1121.32	13.2805
1428.3	13.5254	1633.63	12.3968	1428.3	13.5254	1043.5	33.1552	965.008	93.3974	1044.18	35.9271	1064.23	23.9422	1857	7	1918	37	2126	26	1840	15	1788	38	1083.45	26.087	1053.01	64.5052	461.8	8	1892.54	27.1552	624.8	9.6	1053	16.6	1018.79	11.3139	1351.5	15.5	1009.2	5.5	1734	33	1067.2	28.83	1744	20	1122.83	53.8943
1440.07	14.7604	1670.46	13.5242	1440.07	14.7604	1046.12	39.7883	965.4	68.0697	1045.7	24.659	1066.44	20.2389	1861	31	1944	30	1933	30	1840	13	1826	70	1084.77	60.97	1057.35	26.4331	463.6	9	2008.51	10.8737	630.3	13.5	1053.2	15.1	1023.05	58.2004	1355.7	16.1	1076.9	6.7	1294	35	890.8	40.5	1673	25	1124.2	33.6267
1443.08	58.988	1675.1	10.9688	1443.08	58.988	1051.16	18.1542	976.156	44.4793	1046.34	20.2312	1069.03	40.0255	1863	7	2132	27	2103	31	1847	17	1783	12	1097.1	20.0261	1060.49	62.8019	468	6.7	2696.61	11.1126	635	16.3	1058.2	15.4	1030.01	27.514	1356.1	19.2	1113.2	9.1	572	14	900.8	27.11	2695	17	1124.9	35.5351
1445.72	8.1049	1676.77	13.059	1445.72	8.1049	1061.47	26.1301	979.164	52.7233	1049.61	60.8909	1070.13	63.8181	1874	22	2127	25	2050	55	1854	19	2012	14	1100.04	35.0331	1062.39	26.3919	471.3	8.4	1886.49	16.6859	646.1	11.8	1059.3	22.3	1036.99	61.2767	1356.9	16.9	1063.8	12.4	1353	29	1032.5	44.1	1696	19	1124.97	38.0956
1452.74	28.6317	1680.44	17.1503	1452.74	28.6317	1068.41	44.8585	984.14	46.7887	1053.91	61.9359	1076.53	44.0546	1886	5	2177	24	2221	24	1861	13	1838	24	1103.72	29.2695	1068.55	36.9916	474.3	7.9	2088.66	18.5765	648.2	20.1	1062.1	23.3	1040.75	48.6104	1357.7	12.2	1009.5	6.1	1334	31	942.6	36.64	1265	45	1125.35	19.6374
1463.61	20.3769	1691.66	17.0604	1463.61	20.3769	1071.59	26.2818	998.785	32.5236	1054.13	24.1751	1082.64	20.0773	1889	57	2294	24	2363	33	1867	12	1948	41	1116.92	48.3376	1069.79	59.0975	532.4	9.4	1817.69	49.1441	648.6	14.3	1062.4	16.2	1047.34	69.5454	1357.8	14.1	1313.4	8.5	1002	19	1017.3	30.53	1933	20	1125.76	54.8528
1627.32	31.1355	1701.23	14.8792	1627.32	31.1355	1072.7	44.4993	1000.88	35.0203	1054.67	50.5837	1091.9	41.632	1893	26	2529	55	2367	26	1891	13	1938	33	1118.15	62.289	1072.46	20.2022	547.3	11.2	1861.74	35.4626	649.9	13.5	1064.4	19.6	1049.27	29.5874	1357.9	10.8	1181	4.8	1089	25	1192.5	24.82	1431	35	1129.93	22.3367
1627.77	19.9687	1712.01	12.9949	1627.77	19.9687	1073.95	47.5142	1005.98	44.7042	1056.97	32.8621	1093.09	62.049	1894	31	2594	28	2726	31	1891	15	1489	93	1119.76	78.3074	1073.96	45.6023	563.5	9.8	1883.66	35.9217	733.9	17.8	1064.5	17.2	1049.47	24.5487	1358.2	15.4	1014.4	6.4	2612	52	1646.9	28.95	1228	31	1129.95	48.3001
1636.46	18.9011	1739.17	13.9933	1636.46	18.9011	1074.94	41.1253	1008.33	35.0022	1059.9	24.375	1102	49.0767	1903	39	2723	68	2695	44	1892	13	2549	14	1123.52	44.2655	1083.94	20.0604	600.9	7.8	2602.52	5.50019	785.5	19.3	1065.5	16.6	1051.44	171.271	1358.5	14.9	1074.3	17.9	1055	24	1095.1	112.94	1776	21	1130.89	24.9666
1637.92	11.5564	1746.05	13.4062	1637.92	11.5564	1076.38	71.8397	1011.23	62.3668	1060.07	33.1035	1122.46	27.5683	1907	45	1851	54	2753	31	1895	16	1854	21	1124.42	81.8065	1087.74	39.7129	637.7	13.4	1842.35	34.9108	793	19.5	1070.4	23.1	1062.09	73.0962	1359.1	14.5	989.3	14.1	1789	33	1183.3	56.12	1135	60	1131.49	23.2686
1641.57	23.9472	1750.63	13.3213	1641.57	23.9472	1076.65	39.5816	1012.42	54.678	1064.2	38.0556	1123.96	60.9283	1914	7					1900	13	1833	32	1129.91	87.4979	1087.78	32.873	936.1	55.5	1810.91	31.9986	793.5	15.1	1075.6	21.3	1063.09	30.7534	1360.1	12.8	1019.1	7.1	2176	39	1252.4	44.95	1841	52	1135.9	29.3448
1643.97	23.2818	1752.34	11.9639	1643.97	23.2818	1093.58	27.8005	1012.48	28.4674	1064.43	28.7493	1127.46	35.2926	1924	22					1902	15	1997	13	1145.69	57.689	1089.08	41.2821	963.4	25.3	2005.54	10.2678	835.4	19.7	1075.8	19	1064.03	27.2301	1363.1	16.7	1013.6	7.4	1193	29	1048.3	39.78	1187	56	1143.87	32.9412
1645.27	23.4835	1759.42	13.6592	1645.27	23.4835	1100.77	37.7419	1016.66	98.1726	1068.42	20.1091	1131	44.1634	1927	18					1903	15	2029	35	1161.76	57.3401	1091.89	29.8747	969.4	60.5	2603.41	30.3024	848.9	15.9	1077.7	16.8	1075.17	35.8388	1364.1	15.3	936.8	9.2	1026	19	1319.8	37.08	362	12	1147.31	37.0814
1665.07	26.0235	1762.03	11.4915	1665.07	26.0235	1114.66	62.9728	1019.45	58.7883	1069.32	30.766	1131.02	30.8811	1932	39					1905	12	2678	5	1169.91	85.5876	1093.37	34.4507	994.9	49.5	1789.99	56.1356	850.4	11.1	1081.5	20.1	1090.52	38.611	1364.6	14.6	1206	16.6	1885	36	1176.9	52.29	1212	79	1153.05	19.9377
1674.66	25.7317	1762.04	11.2683	1674.66	25.7317	1120.81	77.6097	1020.6	34.2832	1070.75	20.6984	1137.41	19.9205	1935	10					1908	14	1716	7	1180.87	35.464	1093.59	32.8915	1001.5	28.3	1915.12	14.0612	873.6	16.3	1084.6	15.7	1101.29	54.4594	1365.1	17.2	1111.3	10.6	2799	44	1482.5	31.34	2724	16	1153.72	28.1798
1675.24	6.41468	1767.55	12.8493	1675.24	6.41468	1129.21	64.8121	1022.04	48.3949	1072.85	55.4801	1139.5	72.2732	1940	25					1911	13	1988	7	1196.59	105.603	1101.43	55.8352	1003.6	33.9	1845.99	14.87	913.5	12.6	1090.1	17.6	1127.59	60.0367	1365.3	18.5	950.4	11.8	2089	41	1445.2	40.26	1290	59	1156.45	31.4662
1675.54	22.0152	1770.74	11.4357	1675.54	22.0152	1130.47	27.5069	1024.41	62.6536	1073.42	26.5854	1140.35	48.4322	1941	18					1912	16	1841	48	1211.84	34.2548	1109.01	19.9882	1004.8	29.3	1936.87	10.7698	945	25.7	1092.3	17.5	1128.84	31.4503	1365.3	10.6	1126.8	5.7	1349	42	1334.1	60.94	1135	30	1157.74	48.5487
1677.6	11.8921	1771.35	13.9221	1677.6	11.8921	1131.65	38.6744	1028.21	7.0618	1075.7	21.0885	1141.06	75.4753	1942	20					1915	10	1778	7	1231.93	56.2535	1114.07	43.8176	1007.7	55.5	1808.15	8.15991	958	11.8	1096.7	16.9	1129.09	119.777	1366.2	15.6	1106	4.6	1793	32	1397.9	42.26	1234	93	1166.16	65.0971
1679.89	15.3511	1771.79	12.557	1679.89	15.3511	1133.46	34.2854	1029.33	66.5475	1093.69	77.3408	1141.94	19.9088	1947	11					1915	12			1236.21	29.261	1129.32	51.6499	1007.8	25.8	2190.47	14.0266	1018	17.1	1102.6	17.1	1142.67	72.3826	1366.3	15.7	1249.4	6.2	2771	46	1393.1	22.93	1162	35	1167.78	14.0446
1684.01	12.7865	1776.16	15.2415	1684.01	12.7865	1136.26	53.1617	1035.54	30.1189	1098.3	22.4528	1147.12	24.4522	1948	29					1916	12			1270.17	100.795	1146.55	21.2801	1010.3	32.4	1859.61	38.8538	1028.3	14.1	1103.1	24.2	1144.42	100.325	1367.5	12.8	1018.1	7	1969	32	1402.5	20.26	1653	52	1168.72	42.8771
1687.76	19.7732	1780.44	14.977	1687.76	19.7732	1145.81	28.5203	1036.1	48.2193	1101.47	41.4174	1148.5	58.9102	1990	106					1916	15			1282.96	62.0583	1148.16	19.8717	1010.6	25.5	2206.84	18.1213	1029.3	16.2	1104.5	13.6	1145.98	37.5765	1367.7	18.7	1364.6	24.5	2444	37	1402.3	29.82	1711	31	1172.78	84.7545
1703.7	14.8606	1785.01	12.4446	1703.7	14.8606	1146.64	18.9488	1036.48	47.3486	1112.2	38.6384	1155.4	48.6834	2009	21					1917	15			1283.63	79.8286	1154.7	32.8035	1011.6	46.8	1807.68	15.2885	1036.1	12	1104.8	18.2	1149.73	22.1737	1368	17.8	954.1	7.1	1125	15	1457.3	16.11	1374	30	1175.23	36.9794
1717.4	11.6231	1785.38	15.5797	1717.4	11.6231	1151.82	24.676	1040.59	59.7448	1115.45	20.0632	1160.75	42.7026	2028	22					1918	14			1291.78	100.548	1155.84	43.0734	1011.9	31.7	1940.15	11.8161	1036.7	18.2	1110	14.2	1161.08	47.8579	1368.3	14.3	988.6	2.3	1116	14	1570.1	21.25	2024	19	1176.62	34.2873
1718.85	34.9645	1786.15	11.9207	1718.85	34.9645	1172.89	24.7709	1041.82	33.2586	1123.73	93.1265	1166.83	28.7574	2053	13					1925	14			1301.46	64.572	1166.43	30.5116	1014.6	39.5	1792.8	7.72947	1045.5	12.9	1135.2	24.3	1162.26	35.8608	1369	16.4	1000.9	3.3	1021	25	1940.8	19.33	1937	19	1178.39	46.1015
1720.69	7.31746	1786.7	13.1651	1720.69	7.31746	1174.32	50.9152	1041.99	43.8443	1124.51	24.1335	1168.7	51.8352	2073	43					1925	14			1329.74	19.7506	1168.95	29.5902	1017.6	37.2	2679.22	10.4014	1052.9	13.9	1139.6	16.5	1164.74	16.7193	1369.3	16.3	1161.3	6.9	1131	23	1512.9	34.42	1919	25	1189.37	61.8058
1725.55	22.834	1788.68	14.4735	1725.55	22.834	1177.47	45.7218	1043.21	54.1989	1141.46	19.9057	1168.79	36.847	2074	14					1927	12			1344.82	77.2345	1172.37	31.7285	1017.9	29.3	1847.68	45.7131	1053	15.3	1151.5	16.3	1169.88	41.9428	1370.3	19.9	1100.2	6.1	1135	15	1612	53.23	1045	60	1195.66	66.3366
1729.34	11.7309	1789.26	11.3054	1729.34	11.7309	1186.72	40.7367	1046.54	25.5778	1147.99	22.6496	1180.49	45.5536	2077	14					1927	10			1356.35	25.6467	1179.01	22.3534	1020.1	30.7	2072.69	28.232	1053.7	13.1	1152	25.2	1171.02	29.9328	1370.4	14.6	1246.4	5.7	1039	19	1463.4	31.81	1708	17	1196.94	44.6301
1731.26	16.8707	1794.46	12.4587	1731.26	16.8707	1202.46	51.3077	1049.61	51.4752	1151.88	98.3456	1183.93	49.0297	2077	15					1928	10			1360.5	37.4909	1179.43	70.842	1021.9	41.4	1837.32	38.2696	1055.8	12.5	1158.4	11.9	1187.56	9.88568	1370.5	14.9	1013.4	8.7	998	14	1608.5	21.4	1870	24	1210.53	60.9308
1740.7	31.9429	1796.79	11.1282	1740.7	31.9429	1202.58	34.2537	1053.88	34.1444	1156.95	19.8463	1198.08	74.3713	2078	14					1929	11			1381.28	60.7432	1181.21	19.7728	1026.4	33.4	1844.14	30.961	1057.1	13.6	1167.6	14.9	1212.84	23.4455	1371.9	16.1	1085.7	7.6	1048	20	1666.2	36.58	1228	62	1212.7	65.7069
1743.89	18.8975	1799.16	12.4894	1743.89	18.8975	1208.32	38.8907	1055.59	44.5754	1158.87	52.2178	1202.41	44.1637	2078	25					1930	11			1468.1	39.8897	1182.56	32.9171	1029	22.7	346.445	3.7123	1069	15.8	1186.4	18.4	1214.85	19.0513	1372.1	15.7	1557.7	3.6	1083	28	1979.1	168.62	1932	28	1225.71	35.4672
1750.97	15.1	1805.32	13.4888	1750.97	15.1	1209.66	40.3911	1056.46	54.7828	1160.99	45.6127	1207.85	29.5908	2079	26					1938	13			1474.93	48.389	1183.99	20.5721	1029.6	33.6	1886.86	47.833	1070.8	13.6	1187	19	1216.07	9.78993	1373.1	15	1152.6	7.6	1057	24	1707.4	105.83	1730	27	1226.21	25.2051
1751.61	27.4964	1820.04	10.2533	1751.61	27.4964	1209.83	63.885	1060.5	50.2466	1161.78	32.5492	1214.6	34.6248	2079	14					1940	13			1498.46	50.2088	1197.45	75.2222	1031.2	35.7	2777.38	9.43708	1100	13.1	1194.5	15.4	1234.94	22.7195	1374	13.7	1326.7	5.9	1121	15	1968.4	21.13	1751	43	1237.41	35.5036
1764.38	9.30986	1821.89	12.024	1764.38	9.30986	1210.65	74.1806	1065.91	14.8944	1164.63	19.8787	1217.51	47.2122	2080	14					1943	13			1503.81	60.8709	1197.94	48.9166	1035.9	31.3	2617.3	6.38074	1106.9	12.4	1231.1	12.9	1240.59	41.6738	1374.2	14.4	976.6	4.9	1007	13	2685.8	24.62	1993	17	1238.32	23.5209
1768.44	17.4267	1842.56	12.7711	1768.44	17.4267	1216.68	28.929	1066.04	37.6675	1165.04	25.3751	1224.48	67.6562	2081	8					1955	12			1513.75	18.885	1211.22	22.2679	1036.8	27.3	1854.16	31.8464	1149	13.9	1244.3	21.8	1245.59	17.9373	1374.6	12.5	1022.9	4.1	1023	16	358.8	4.1	1250	91	1241.02	88.6856
1775.43	12.4044	1848.8	14.0845	1775.43	12.4044	1223.47	53.5694	1067.7	51.9971	1171.42	41.6182	1224.88	28.7417	2081	30					1967	16			1524.7	37.9091	1223.97	30.0868	1037.7	32	2024.28	71.5891	1174	11.6	1272.6	18	1315.96	121.144	1374.8	18.4	1011.1	7.8	1126	18	381.7	3.98	434	4	1241.47	31.2705
1787.55	7.50933	1851.46	14.4226	1787.55	7.50933	1227.86	25.0346	1068.83	28.2639	1176.47	32.2852	1228.69	86.8895	2093	33					1978	12			1535.4	105.596	1231.45	38.4801	1038.7	30.3	2616.45	6.70674	1184.5	11.7	1272.9	13	1328.64	53.6112	1374.9	10.7	1052.1	7.3	1019	13	388.1	5.13	1803	17	1241.85	23.5689
1814.76	10.7694	1879	12.5371	1814.76	10.7694	1235.91	58.2458	1070.34	39.1194	1186.82	19.7603	1229.3	30.0644	2099	27					1979	14			1550.02	22.9308	1258.57	45.9616	1038.8	25.4	1824.86	82.1199	1197.2	13.4	1297.6	10.8	1337.58	31.8384	1375.1	18.1	1067.7	8.8	1000	14	426.1	3.17	2488	40	1244.26	77.4993
1820.25	32.459	2447.99	11.4168	1820.25	32.459	1250.77	16.5483	1070.81	24.8365	1188.93	26.8763	1237.77	65.9082	2100	21					1981	14			1583.34	87.1931	1278.02	80.7302	1039	50.4	2663.54	10.0293	1321.8	15.8	1327.5	16.4	1338.12	29.3739	1375.1	15.6	1082.6	12.4	1003	35	431.1	7.2	1610	38	1251.67	21.7764
1907.74	11.0256	2620.92	13.7845	1907.74	11.0256	1270.27	127.227	1072.22	24.3469	1190.04	19.7626	1242.14	45.8651	2110	13					1996	15			1618.96	62.4653	1297.16	70.8256	1039.4	35.4	2219.41	7.13215	1636.9	10.9	1332.3	15.3	1358.78	21.6394	1375.9	15.9	1169.6	9.1	1066	15	441	12.38	1376	43	1252.71	42.3004
1940.69	15.297			1940.69	15.297	1272.42	65.3616	1074.05	53.4547	1191.58	46.9854	1269.53	42.5843	2224	17					2047	13			1622.24	57.6938	1300.46	20.7973	1042.7	63.8	1843.86	11.7006	1683.5	38.5	1349.1	11.9	1367.75	22.0074	1378.9	18.9	1039.8	10.2	1153	16	459.3	9.12	1779	29	1261.23	31.8458
1959.26	24.6552			1959.26	24.6552	1281.33	14.6128	1075.29	72.9554	1196.82	24.6729	1273.74	20.4665	2289	16					2055	12			1661.78	20.0725	1300.82	30.7361	1043.7	26	1850.18	24.2674	1774.3	10.4	1364.8	16.5	1392.59	99.6388	1380.5	19.4	975.5	2	622	9	2411.1	36.35	2599	16	1270.52	25.076
1963.7	50.9135			1963.7	50.9135	1307.07	48.1984	1075.67	48.5215	1200.43	43.4186	1292.48	39.8902	2338	13					2078	20			1681.05	18.4671	1302.86	53.0929	1045.1	67.2	1984.98	10.7397	1879	15.6	1379.8	12.9	1410.37	22.1996	1380.9	16.6	3296	5.5	1037	16	1105.8	41.97	1609	96	1278.75	64.2377
1982.06	18.1925			1982.06	18.1925	1317.93	71.9162	1077.94	45.634	1204.43	28.7726	1297.81	46.4309	2389	8					2080	13			1722.91	58.9786	1317.35	65.0187	1046.4	40.5	1851.04	25.6041	1883.4	13.7	1390.6	13.6	1430.32	18.3549	1381.1	23.2	1120	15.3	1196	69	1041	48.33	1216	13	1290.65	91.6647
1985.8	18.0085			1985.8	18.0085	1327.02	22.6854	1078.98	38.9418	1212.73	53.5456	1347.08	37.0771	2525	9					2121	12			1730.87	106.914	1318.57	29.8708	1047.5	32.1	1801.58	15.5261	1885.2	10.9	1392.4	16.8	1435.86	6.99686	1382.4	15.6	1707.1	16	1186	22	1249.4	53.53	1904	84	1315.73	60.6016
1995.36	14.5338			1995.36	14.5338	1377.58	38.2649	1079.7	35.7424	1218.09	36.3864	1372.33	46.975	2527	8					2308	12			1740.78	22.364	1330.57	91.0565	1051.4	31.5	2732.41	11.9971	1952.9	11.8	1438.2	16.1	1467.96	86.5542	1383	14.5	1014.7	5.5	1064	14	1903	35.88	354	10	1372.09	22.753
2012.95	23.9752			2012.95	23.9752	1407.39	63.2698	1081.4	20.5586	1231.56	75.2002	1373.63	29.8775	2586	12					2311	13			1781.86	41.3887	1347.48	19.329	1052.5	32.5	2495.6	8.59983	1953.5	12.3	1455	11.7	1472.73	13.7312	1384	18.6	1032.2	9.1	647	16	1174.8	94.8	1204	47	1395.43	66.0958
2062.89	18.5562			2062.89	18.5562	1420.89	62.2811	1081.66	69.6625	1249.54	19.5931	1377.45	19.2413	2678	11					2356	12			1850.09	18.0847	1366.64	35.0751	1055.4	43.1	1897.07	29.203	1954.5	14	1458.4	55.9	1490.43	17.0823	1386.7	16.1	1009.6	3.1	1010	13	1076.4	107.65	466	15	1418.55	62.3408
2222.96	13.5973			2222.96	13.5973	1421.29	25.7442	1082.13	26.8825	1251.57	27.029	1428.33	84.2351	2688	8					2395	13			1881.89	18.019	1373.12	29.8385	1056.4	44.4	1861.14	9.99541	1967.1	11.1	1459.1	15.2	1490.64	9.71933	1387.8	11.1	1020.7	7.1	1150	27	1328.9	40.48	1233	82	1420.99	26.8707
2569.28	11.1056			2569.28	11.1056	1421.83	54.111	1083.48	77.851	1256.41	54.9878	1428.67	42.967	2702	5					2418	12			1899.21	18.0001	1406.64	75.0903	1057	27.3	1854.32	8.42355	1974.8	14.3	1470	16.5	1490.94	17.8899	1391.6	21.1	1034.1	12	1034	13	1378.5	73.68	1666	49	1423.76	25.8245
2608.91	17.4425			2608.91	17.4425	1422.98	49.7945	1088.6	166.691	1316.47	74.4815	1454.15	30.0287	2708	5					2476	10			1916.64	40.7036	1432.41	45.7983	1057.2	30.2	1864.83	60.2434	2025	12	1472.8	11.9	1492.63	25.1865	1396.1	14.9	1013.5	12.6	1118	20	1291.4	173.19	1666	28	1427.23	46.4664
2773.07	16.468			2773.07	16.468	1436.93	13.3531	1090.28	54.1986	1325.54	89.2223	1456.75	55.3539	2717	10					2494	12			1997.89	57.5527	1441.16	28.7836	1057.8	35.7	1856.18	87.3822	2034.5	13.6	1483.4	15.5	1541.35	17.9152	1397.1	21.4	1164.1	6.4	1013	21	1203.9	40.24	450	17	1428.03	34.4929
2862.45	9.44672			2862.45	9.44672	1444.88	26.9114	1098.63	12.62	1392.32	27.2515	1461.62	32.9448	2719	20					2532	10			2631.36	46.0947	1451.16	19.059	1058.9	28.7	1949.59	19.8662	2058.5	13.1	1508.7	14.6	1560.69	7.49491	1397.2	14.9	1031.3	10.3	969	16	1399.5	36.34	1986	13	1433.68	54.2269
2928.82	9.16274			2928.82	9.16274	1448.19	22.4884	1106.15	31.2946	1397.03	51.0125	1470.22	18.9928	2722	8					2557	14			2683.83	43.664	1465.88	26.5957	1060.9	37.4	2006.74	13.6763	2076.3	10.7	1514	17.8	1567.81	13.0799	1398.1	21.7	934.7	7.1	1133	24	2408.9	29.37	1857.8	14.1	1436.19	25.4648
3755.89	5.39827			3755.89	5.39827	1454.64	28.0901	1106.54	48.6233	1399.54	49.2745	1474.47	44.5147	2723	7					2557	10			2727.37	16.7983	1469.77	39.6819	1061.8	38.3	2567.99	12.1995	2094.6	10.8	1545.4	14.3	1635.07	25.6308	1398.7	17.4	1148.9	8	1004	22	2244.2	33.32	1826.6	16.5	1442.23	24.0415
393.483	10.8877					1517.59	31.984	1116.17	16.9482	1400.02	31.6441	1474.94	27.7007	2746	16					2561	9			2732.3	33.7514	1473.32	31.5092	1062.3	26.6	1765.38	42.5125	2128.4	11.5	1572.4	12.6	1650.58	15.342	1401.7	13.3	984.9	4.3	1085	15	1704.5	48.2	1923.9	15.6	1442.85	53.6003
422.618	17.4521					1517.72	56.3647	1116.87	55.2034	1423.46	27.0153	1502.77	58.0687	2748	24					2563	8			2766.81	27.5746	1478.35	24.8474	1063.2	22.7	1786.5	10.8178	2184.9	14.7	1628.7	14.9	1754.12	27.8264	1409.1	17.7	1252.4	6	1137	20	1544.3	104.56	1830.9	15.5	1445.55	46.5145
424.187	11.7707					1618.26	9.33173	1117.67	46.5497	1481.66	34.7606	1527.01	32.4358	2935	20					2571	9			2767.4	16.4076	1493.07	58.6861	1065	37.8	340.154	7.56207	2357.6	15.2	1631.5	16.3	1838.8	21.9596	1410.9	28.2	1130.9	7.4	1004	20	1487.1	33.8	1896.1	15.9	1452.18	30.9154
432.819	21.0227					1636.57	49.4011	1117.95	49.9499	1484.54	22.7419	1681.35	39.7072	3219	7					2577	8			2772.33	29.208	1498.85	28.5715	1065.4	37.3	1843.55	31.0104	2475.6	11.4	1633.3	15.2	1907.6	17.3804	1411.7	18.2	1734.7	6.8	1439	18	2131.7	65.45	1816.4	10.9	1452.33	19.9132
450.187	26.0189					1648.81	47.6145	1129.2	47.1533	1491.55	30.1674	1849.42	26.9486							2578	10			2773.29	42.244	1502	48.0294	1067.9	37.2	1823.46	17.77	2525	11.2	1716.6	10.9	2078.74	28.8718	1415.5	20.5	1042.6	22.1	1025	16	1871.8	29.67	1914	17.1	1454.9	31.4177
460.648	19.4053					1650.09	21.2432	1130.42	59.8004	1499.83	34.6135	2750.59	25.4819							2585	12			2891.01	18.6758	1523.34	39.8833	1068.3	39.9	1858.56	22.8964	3029.6	9.7	1718.9	12			1420.5	20.4	1067.9	5.6	1108	27	1671.5	24.56	1829.1	18.8	1457.58	35.3773
464.389	12.0079					1680.14	9.7617	1144.3	55.9952	1512.07	23.8025									2639	11			2911.24	16.21	1588.67	24.3518	1069.3	45.5	1887.59	75.4241	3228	8.4	1731.3	17.4			1425.2	24.2	1225.9	5.8	1105	15	1710.1	35.91	1780.6	17.3	1460.81	20.7624
478.957	15.5397					1735.6	12.4815	1148.32	82.3809	1518.63	20.9482									2639	16			2950.25	40.8644	1594.6	24.8341	1070.4	46.3	2092.61	22.4671			1794.3	14.8			1434.3	12.3	1112.7	24.2	580	12	1662.5	37.11	1828.4	16.6	1480.46	46.5443
707.45	61.3779					1779.42	16.8558	1151.78	30.4901	1661.55	43.3246									2644	13					1631.32	36.4282	1071.3	39.5	1835.9	16.1208			1809	16			1440.8	19.9	1028.1	8.5	1148	23	1696.3	33.52	1848.1	13.1	1483.65	19.553
947.205	68.1073					1841.46	7.90988	1156.46	43.3277	1662.43	18.5196									2653	12					1719.26	30.5273	1072.3	39.8	1777.32	30.4311			2263.4	10.1			1484.1	24.7	999.3	4.9	999	16	1743.4	24.03	1839.9	14.9	1486.56	31.5633
954.905	14.974					1880.63	12.3013	1158.3	49.3699	2006.5	33.2012									2653	11					1870.82	18.0465	1073.7	27	1917.05	45.8799			2286.9	13.5			1521.4	21.4	1087.3	8.6	591	10	1700.9	20.77	1847.1	16.5	1614.79	93.8169
978.622	75.5579					2013.99	17.851	1168.98	57.5987											2656	11							1074.1	38	1925.61	68.4466			2704.3	16.2			1583.8	46	1008	5.4	1001	24	1729.4	46.75	1844.7	15.6	1622.01	45.1831
981.507	25.5894					2095.25	10.1414	1177.24	28.835											2685	10							1074.7	29.2	1385.24	32.7115			2714.8	12.4			1624.6	11.4	989.7	12.4	1076	16	1796.8	30.71	1790.7	12.6	1625.52	32.6102
982.127	35.1163					2632.35	11.6817	1178.89	41.0627											2702	9							1075.4	44.4	2703.76	9.6569			2738.9	15.7			1654.6	13.3	1225.3	8.4	1126	14	1790.3	36.6	1822.1	14.4	1646.1	27.1939
984.429	68.0656					2776.1	9.10144	1182.42	36.3948											2739	11							1076.1	63	2598.23	5.78832							1738.1	15.3	1147	5.6	1027	12	1885.2	48.89	1849.7	15.8	1654.6	39.2887
996.04	57.3543					2817.11	10.5667	1190.27	43.0507											2796	12							1079.6	42.4	1875.43	12.6974							1763.9	34.2	1191.2	9.2	1006	13	1887.7	42.96	1840.8	16.6	1656.86	26.9839
1008.1	44.2646							1190.68	24.7209											2822	12							1080.1	58.6	1861.53	132.331							981.6	15.7	1311.9	7.3	1159	14	1821.5	28.29	1843.8	14.7	1659.46	19.0098
1010.16	25.195							1190.73	10.4957											2852	13							1080.9	37.5	2084.9	27.5507							989.7	12.9	1310.1	10.6	1506	19	1860.5	22.16	1827.1	16.9	1663.46	6.80628
1012.39	16.45							1194.91	21.1834											2918	11							1085.7	54.2	1861.02	25.46							995.3	13.5	1013.8	9.7	1019	12	1907.1	19.26	1833.7	15.7	1670.94	34.5949
1013.38	78.7329							1202.8	59.3926											2974	12							1088.4	23.2	1818.1	16.0521							995.7	22.8	1691	7.9	1140	14	1906.7	33.7	1989.5	15.9	1673.46	33.2964
1015.01	51.1904							1206.82	21.1902																			1089.2	30.5									1004.4	15	1465.3	5.5	1030	12	2573	22.03	1803.3	15.5	1673.69	22.7071
1017.43	35.4819							1206.97	28.6641																			1089.9	29.6									1004.9	12.6	2362.8	24.9	1003	12	1938.6	80.35	1868.9	16.6	1674.25	33.1357
1021.85	63.258							1215.33	40.0726																			1089.9	44.3									1005.2	14.3	1062.3	11.6	1116	14	2036.8	37.51	1842.6	16.5	1690.29	32.8329
1026.72	41.0668							1215.44	71.6896																			1090.1	30.5									1005.6	15	1848	5.2	760	40	1828.6	59.21	1811.8	10.2	1691.33	78.4497
1029.04	58.0535							1230.06	43.705																			1090.3	34									1015.3	15.8	1071.7	4.6	1797	25	2127.3	114.84	1874	18.4	1694.22	78.8255
1032.65	79.0391							1233.12	68.482																			1090.5	26.1									1026.1	19.8	1415.4	10	1783	23	2140.1	51.47	1847.9	10	1694.67	70.9386
1033.44	14.6214							1238.26	57.9826																			1090.7	36.1									1026.5	17.5	1123.9	4.8	1783	22	1900.4	43.47	1848.4	18.8	1700.15	65.4696
1033.59	27.5093							1243.98	39.4559																			1092.1	56.5									1026.5	14.8	1790.3	18.3	2791	34	2243.4	25.83	1841	15.9	1712.8	18.9319
1040.11	52.2986							1245.51	46.1903																			1092.4	46.7									1027.4	11.8	1579.6	20.3	3000	31	2360.7	36.81	1859.4	11.1	1720.09	19.8824
1041.47	77.8515							1245.54	71.1761																			1096	31.5									1037.7	12.1	1255.1	10	3112	33	2542.6	29.94	1901.3	14.9	1721.41	18.4276
1043.03	30.7405							1250.87	26.4404																			1096.2	38.3									1039	15.7	1320.7	7.5	2655	28	2575.6	117.38	1846.7	10.2	1731.64	29.2653
1043.5	33.1552							1255.87	34.4183																			1096.7	29.9									1040.5	15.9	1242.2	5.7	1356	28	2700.9	27.09	1845.6	14.5	1732.22	33.9493
1046.12	39.7883							1259.94	26.739																			1097.1	40.1									1043.5	14.2	1089.5	7.6	1384	23	2575.5	17.4	1843.9	13	1736.44	31.47
1051.16	18.1542							1268.13	29.3551																			1098.6	27.2									1046.7	15.9	1573.3	7.6	2823	43	2638.4	19.55	1854.8	14.6	1741.31	37.4994
1061.47	26.1301							1275.3	73.4038																			1100.1	19									1049.3	18.7	2142.6	12.4	1019	21	2511.9	34.66	1896.8	9.5	1744.62	44.1242
1068.41	44.8585							1307.6	34.089																			1101.3	52.6									1051	17.2	1105.4	8.1	2751	43	2778.1	44.28	1876.6	12.1	1746.07	49.4946
1071.59	26.2818							1315.17	45.4651																			1101.8	23.7									1054.9	15.7	1429.3	10.1	2740	31	2915.9	63.8	1831	14.3	1748.25	10.2523
1072.7	44.4993							1324	67.2521																			1104.6	32.1									1059	16.6	1175.1	2.8	1289	24	2578.3	120.21	1986.1	18.1	1755.82	5.21537
1073.95	47.5142							1326.91	31.2519																			1105.1	33.9									1062.8	24	1031.4	15.5	1260	23	2971.9	113.5	1910.7	16.9	1762.73	70.0932
1074.94	41.1253							1358.18	17.4714																			1105.9	36.6									1064.8	14.6	2659.8	17.7	1786	20	389.8	4.67	1859.8	10.1	1766.68	36.6809
1076.38	71.8397							1365.29	87.0353																			1108.2	39									1064.9	19.8	1214.6	23.3	2447	25	401	4.96	1883.3	16.1	1772.26	43.0979
1076.65	39.5816							1380.37	36.2762																			1108.5	19.3									1066.7	18.1	2086.4	31.8	2728	33	425.4	21.12	1882.1	9.7	1775.94	17.4914
1093.58	27.8005							1394.45	34.0621																			1109.7	30.3									1066.8	18.4	1593.9	8.9	2620	26	426.4	14.4	1887.3	18.6	1779.07	35.2439
1100.77	37.7419							1402.89	69.2375																			1113.9	44.3									1068.5	16.9	1478.8	4.4	1809	20	434.2	13.59	1873.7	16.9	1792.57	11.0936
1114.66	62.9728							1408.08	39.5595																			1115.5	29.3									1071.4	13.4	1122.6	5.7	2172	43	436.6	6.04	1905.1	12.1	1793.89	37.717
1120.81	77.6097							1410.01	52.7296																			1115.8	43.5									1075.9	21.4	1289.6	8.4	1426	56	949.1	43.42	1848.3	18.6	1819.55	45.7235
1129.21	64.8121							1411.18	29.034																			1116.7	40.7									1076.1	13.3	1717.7	10.2	1291	17	1003	36.27	1897.2	18.1	1837.54	46.5397
1130.47	27.5069							1418.07	44.854																			1118.5	28.4									1078.3	12.2	1143.7	8.1	2232	23	1074	29.11	1860.6	9.8	1887.21	11.1774
1131.65	38.6744							1418.68	15.1498																			1122.5	24.8									1080.5	15.7	1405.8	9.4	1690	17	1086	46.35	1851.1	12.4	1921.58	39.2595
1133.46	34.2854							1431.85	64.6516																			1125.4	26.2									1085.9	15.4	1341.1	7.8	931	10	1215.6	137.92	1822	14.6	2179.93	20.1034
1136.26	53.1617							1433.08	43.0392																			1126.8	38.1									1086.9	14.8	1418.7	6.3	1765	18	1085.3	92.4	1904.5	12.4	2185.88	66.4266
1145.81	28.5203							1437.7	19.208																			1130.1	50.7									1095.9	14.2	1981.9	36.1	1721	20	1070.8	48.88	1901.4	12.4	2299.05	21.7779
1146.64	18.9488							1442.15	7.25206																			1133.8	24									1099	24.3	1864.6	6.4	2722	41	1130.8	41.97	1838.4	17.2	2384.16	43.8002
1151.82	24.676							1445.82	18.7071																			1134.1	42.9									1100.3	12.5	1212.4	10.6	2701	36	1179.5	128.35	2000.2	17.3	2590.99	7.52773
1172.89	24.7709							1446.8	49.985																			1134.4	48.6									1100.5	14.5	1510.3	11.7	2787	55	1148.1	160.04	1915.5	16.4	2614.14	7.71659
1174.32	50.9152							1450.29	32.8948																			1145.9	31.3									1100.9	16.7	1166.1	3	2349	25	1076.2	113.47	1889	9.6	2645.71	64.5874
1177.47	45.7218							1454.02	18.7481																			1146.3	45									1103.2	16.8	1295.2	6.3	1834	20	1286.6	44.49	1866.3	18.6	2653.65	152.153
1186.72	40.7367							1456.17	60.4192																			1146.8	29.8									1124.7	15.7	1370.3	5.4	3458	33	1348	35.39	1878.3	18.9	2774.77	24.2799
1202.46	51.3077							1457.02	35.7738																			1153.2	32.4									1131.5	16.7	1382.5	6.4	3269	38	1098.7	123.7	1887.3	16.9	2846.31	60.917
1202.58	34.2537							1461.16	29.1982																			1154.9	55.2									1137.1	14.6	1124.8	4	2627	35	1697.2	48.6	1860.8	17.4	2927.06	44.4959
1208.32	38.8907							1474.81	33.1946																			1155	34.3									1138.2	14.2	1366.5	8.9	2843	29	1725.1	54.26	1941.9	9.8	3079.25	19.8121
1209.66	40.3911							1515.36	18.7003																			1155.5	34.2									1140.3	23.1	1107.8	6.4	2669	35	1891.3	39.06	2339.2	18.4	1064.61	41.2438
1209.83	63.885							1525.81	31.1111																			1156.6	27.7									1155.3	14.6	1088	11	2616	29	1966	79.49	1899	18.3	1141	35.5773
1210.65	74.1806							1529.13	54.0072																			1158.1	37.4									1171.6	18.2	1963.5	14	1885	20	2286.1	90.74	2139.3	12.2	1326.9	27.5827
1216.68	28.929							1566.47	28.4202																			1158.2	46.3									1175	11.8	1221.7	13	1793	19	1975.7	93.45	1916.5	17.1	1674.62	39.3705
1223.47	53.5694							1572.66	10.381																			1160.1	31.2									1181.1	14.4	1555.5	17.2	2772	41	1853.2	36.12	1877.9	17	1683.27	29.8931
1227.86	25.0346							1622.59	43.9357																			1165.2	46.4									1181.6	18.8	1077.3	6.9	2714	49	1861.1	29.41	2046.6	18.2	1689.9	28.726
1235.91	58.2458							1626.95	42.7631																			1167.6	24.3									1185.8	15.5	1092.1	5.8	1057	32	1859	49.02	1877.4	16.6	1697.44	26.2911
1250.77	16.5483							1637.27	83.3258																			1169.8	37									1205.2	17.2	1651.3	23.2	1172	26	1989.2	43.9	2116.5	12	1753.32	6.11165
1270.27	127.227							1637.63	15.3192																			1172.4	29.9									1207.1	17.2	1594.9	6.8	1190	21	1817.1	27.46	2451.3	18.5	1753.51	18.3038
1272.42	65.3616							1646.56	19.0535																			1173.5	22.6									1228.5	19.6	1033	8.9	1165	16	1835.2	44.21	2199.8	16.1	1754.59	43.0034
1281.33	14.6128							1650.05	27.9753																			1174.1	32.1									1237	12	1271.2	9.8	1334	18	2029.7	39.43	2051.1	14.5	1778.04	11.3268
1307.07	48.1984							1656.76	66.3903																			1176.1	38.2									1281.6	21.6	1012.7	3.5	2596	28	1775.7	35.72	2198.3	9.6	1780.36	17.8774
1317.93	71.9162							1663.15	18.4684																			1178.1	46.3									1338.7	16.3	930.2	31.1	2538	29	1831.3	57.34	2206.8	15.3	1784.6	18.9745
1327.02	22.6854							1664.37	44.0332																			1181.7	28.1									1344.5	13.4	981.8	11.1	1131	24	1906.1	33.49	2801.3	15.1	1785.95	23.512
1377.58	38.2649							1668.29	25.8948																			1193	23.9									1353	13.4	1222.6	12.8	1060	14	1904.6	30.35	2845.2	11.7	1787.55	18.645
1407.39	63.2698							1669.59	13.2771																			1193.9	26.1									1356.9	16.2	1118.8	5.3	1060	12	1972.1	103.28	2295.1	16.6	1802.33	20.3778
1420.89	62.2811							1681.13	9.93001																			1199.4	32.3									1357.7	13.4	883.7	9	1385	23	1831.3	46.58	2447	13.6	1805.01	25.4573
1421.29	25.7442							1685.13	14.3376																			1200.9	25.8									1358.5	16.6	1006.1	15.8	1355	46	1830.7	55.16	2289.8	15.7	1806.13	75.1236
1421.83	54.111							1689.91	14.9607																			1206.9	47.2									1362.2	13.3	1131.7	5.8	987	17	1897.5	30.96	2409.2	17.6	1809.83	26.0572
1422.98	49.7945							1696.5	32.8599																			1207.4	41									1366.5	15.8	1115.6	8.3	1170	27	2000.2	43.47	2529.1	15.3	1813.75	18.2314
1436.93	13.3531							1708.72	16.8589																			1208.3	31.3									1366.7	14.5	1612.6	14.1	1140	21	1854	43.2	2599.5	16.3	1814.14	40.5816
1444.88	26.9114							1722.69	15.5457																			1210.5	26.1									1389	14.5	1051.5	7.9	1007	20	1930.1	54.86	2592.5	11.8	1814.58	18.418
1448.19	22.4884							1738.86	23.5372																			1210.7	32.9									1389	10.3	1088.3	9.2	1069	22	2137.2	44.8	2676.9	12.9	1816.93	18.3401
1454.64	28.0901							1743.31	30.9134																			1212.6	30.3									1389.1	13	1239.7	9.5	1141	20	2173	39.51	2727.3	15.4	1817.32	18.1699
1517.59	31.984							1747.31	12.5416																			1221.6	37.5									1395.7	13.9	1511.4	8.7	1167	24	2322.9	90.72	2730	11.1	1822.58	46.0909
1517.72	56.3647							1755	3.80056																			1228.3	35.3									1406.8	14.2	1150.9	4.8	1124	20	2002.7	65.19	2685.2	15.9	1823.46	23.2276
1618.26	9.33173							1762.92	9.43233																			1230.6	30.1									1414.6	12.9	1140.7	5.6	1139	20	2012.7	41.84	2701.1	14.1	1825.96	18.1405
1636.57	49.4011							1791.04	17.856																			1237.5	45.9									1436.5	13.8	1214.1	14.2	1088	21	1764.4	90.94	2712.7	17.4	1827.5	18.783
1648.81	47.6145							1792.28	31.9801																			1238.4	59.7									1437.7	12.9	965.5	14.6	1132	24	2317.3	90.63	2678.3	16.4	1830.6	14.3757
1650.09	21.2432							1823.19	11.4524																			1254	25.4									1439	11.6	1140.5	5.4	1095	25	1951.4	52.16	2707.8	8.9	1831.92	45.0845
1680.14	9.7617							1847.19	17.672																			1277.7	38.1									1446.6	13.9	1084.7	20.2	1099	23	2078.1	82.47	2781.8	16.7	1832.66	18.502
1735.6	12.4815							1851.22	14.064																			1290.3	50.4									1447.6	16.4	999.4	10.1	1122	22	2105.8	30.75	2858.3	11.7	1832.76	24.8275
1779.42	16.8558							1877.16	24.7009																			1300.1	31.4									1452.5	13.6	1162.6	10	1094	22	2346.2	52	2755.9	20.1	1833	18.1802
1841.46	7.90988							1878	10.3983																			1305.5	26.6									1453.3	16	1130.2	24.3	1061	26	2378.9	47.99	2737.6	15.8	1835.55	39.5317
1880.63	12.3013							1881.87	70.4652																			1316.9	45.7									1458.6	13.8	1188.4	13.8	1067	22	2558.3	31.46	2933.9	16.7	1836.38	40.0176
2013.99	17.851							1896.93	45.562																			1327.1	60.9									1462.5	11.6	1211	6.2	1124	24	2529.3	27.28	406.2	9	1836.63	18.1198
2095.25	10.1414							1900.39	6.66419																			1327.3	27									1464.8	15.7	975.5	8.9	1138	33	2603.4	27.9	431.5	12.2	1837.7	26.0316
2632.35	11.6817							1915.21	9.36416																			1330.8	21.2									1467.9	11.2	1013.3	10.9	1223	35	2536	52.02	439.7	7.7	1838.04	18.1147
2776.1	9.10144							2004.55	21.2657																			1331	34									1477.9	15.5	1392.7	8.7	930	23	2785.5	42.68	1064	14.6	1840.09	21.9077
2817.11	10.5667							2096.04	2.78102																			1331	26									1496.4	12.7	1030.8	5.7	1077	23	2695.7	30.14	1022.4	22.3	1844.55	18.6692
380.617	9.90887							2180.15	8.48703																			1332.7	27									1596.9	15.1	1055.6	6.7	1129	19	2825.6	22.94	1014.4	17.8	1844.82	23.6049
410.148	10.4969							2692.38	12.7948																			1334.6	21.5									1618.1	12	1038.2	4.4	983	24	2857.1	33.79	1148.4	18.7	1845.26	18.107
410.863	11.3781							2695.21	10.2448																			1336.3	33.9									1628.7	12.6	1178.2	15.1	943	23	2800.8	66.13	1168.5	18.2	1845.45	25.6959
411.66	33.1236							2704.96	12.1648																			1349.1	16.4									1630.4	11.7	1148.9	7	1121	32	3340	43.84	1034.7	15.2	1846.75	27.7538
412.307	9.39053							2712.17	8.03046																			1364.6	28.5									1659.6	13.3	1131.5	4.9	994	26	395.7	3.35	1014.2	23	1846.92	18.0913
412.878	7.23243							2768.03	8.83687																			1366.4	32.1									1672.8	14.5	1322.9	4.3	1110	20	417.2	6.25	1015	11.4	1848.42	28.3986
418.951	12.4627							2782.09	37.6981																			1379	25.7									1742.1	12.4	1124.1	13.3	1034	19	1014.4	21.18	1057.5	20	1848.96	36.034
425.36	12.4572																											1384	24									2596.7	13.8	976.7	14	1145	21	1191.1	44.27	1040.7	18.1	1854.21	17.8625
426.668	6.11531																											1390.4	33.2									2604.3	10.8	1168	12.8	1119	28	1183.9	42.98	1117.3	19.6	1854.81	10.1985
434.44	23.19																											1400.6	30.8									2628.6	13.5	1276.3	13.4	1039	28	1149.6	21.37	1020.8	18.8	1855.99	33.2278
436.491	23.1536																											1405.2	31.5									2652.6	13.6	1187.3	7.4	1121	23	1180.9	20.62	1066	17	1857.31	42.6442
439.697	12.7906																											1407	29									2665.1	12.2	578.5	4.3	1036	26	1219.8	33.92	1056.7	19.8	1858.89	26.7384
447.677	9.43051																											1409	33.9									2667.9	10.8	907.9	13.4	1078	21	1426.4	23.98	1123.3	16.5	1859.15	18.0626
464.063	17.5481																											1418.9	72.5									2677.7	9.1	994	7	1186	30	1399.1	50.68	1058.5	15.2	1859.15	18.9705
470.249	29.5072																											1427.8	24.1									2679.3	11	950	5	1083	22	1407.6	21.37	1146.9	23.9	1859.24	25.6517
476.335	16.2498																											1430.2	19.5									2689.4	11.9	991.9	8.6	1120	19	1436.6	45.35	1260.4	14.3	1859.53	10.3723
479.42	12.4049																											1430.7	25.3									2695.8	18.8	1397.3	13.1	1140	20	1432.8	20.19	1136	20.5	1861.17	16.6614
479.528	25.8671																											1438.3	25.5									2696.6	11.2	1220.3	12.9	1129	31	1484.3	24.54	1109.5	13.5	1861.99	18.1033
484.767	27.9993																											1442.2	33.2									2700.7	13.6	1113.7	8.6	1100	23	1484.8	71.92	1171.2	16.5	1862.62	18.0565
538.343	28.2103																											1444.1	16.7									2700.9	11.3	986.3	4.8	1152	25	1737.8	15.16	1178.4	20.8	1865.06	10.4235
547.946	20.3159																											1445.1	21.5									2705	12	1173.4	4.9	1110	23	1793.8	22.63	1231.7	16.4	1866.41	17.8822
569.627	15.974																											1464	29.2									2706.3	10.9	1128.5	10.6	1195	24	1874.3	33.4	1244.6	13.7	1867.28	20.0437
624.283	22.2548																											1466.2	22.6									2712.2	9.6	964.7	9.1	1090	27	1862	30.88	1225.8	13.5	1868.86	23.8188
725.689	17.2048																											1479.8	38.9									458.3	11.3	1378.5	14.3	1005	20	1688	31.75	1292.8	10.5	1872.27	12.4075
739.766	15.2882																											1482.2	23.5									719.8	11.9	937.7	7.1	1081	30	1833.9	33.73	1390.6	12.7	1875.66	10.4272
868.195	30.2264																											1488.3	34.8									939.8	22.3	889.6	11.4	1160	26	1900.4	53.55	1282.6	20.6	1876.53	25.4203
946.007	59.6887																											1488.9	22.9									975.4	14.9	1160.2	7.3	1135	31	1874.2	24	1385.1	11.1	1876.65	26.3207
946.541	16.5675																											1491.4	24.8									991.8	16	1115.6	11.7	1109	19	1817.4	19.69	1302.3	12.1	1878.29	24.3558
959.055	80.8996																											1492.5	25.7									992.3	18.3	1211	11.6	1045	23	1841.6	34.67	1347.8	17.6	1887.18	27.6303
961.665	64.5879																											1493.6	47.9									992.6	15.8	1211.8	22.9	1031	21	1791.4	22.76	1356	16.4	1888.39	26.8611
962.569	38.5786																											1494.7	18.6									997	16.2	1019.5	6.2	1124	26	1813.3	18.15	1448.6	14.4	1889.76	29.3159
965.008	93.3974																											1497.3	21.1									999	21.3	1321.3	12.7	1971	36	1872.6	33.47	1660.1	19.5	1892.06	30.4941
965.4	68.0697																											1502.1	17.9									1000.7	18.4	1185.2	5.9	1518	25	1789.9	30.59	1482.9	17.9	1906.08	28.7691
976.156	44.4793																											1507	22.1									1002.9	18.1	1277.8	5.7	1821	31	1937	22.7	1558.9	12.5	1909.62	32.5011
979.164	52.7233																											1512	20.5									1005	16.7	1208	11.2	1868	32	1779.7	24.34	1661.5	12.8	1914.61	22.2526
984.14	46.7887																											1515.6	25.6									1007.3	15.9	1262.1	6.4	1815	33	1955.6	18.95	1832.3	15.9	1915.22	10.4273
998.785	32.5236																											1518.2	20.6									1008.8	16.6	1141.4	20	1465	27	1777	29.88	1631.6	15.6	1921.44	17.9393
1000.88	35.0203																											1522.9	25.5									1009.3	24.8	1143.4	4.1	1106	20	1927.6	19.47	1650.4	13.9	1923.99	17.9269
1005.98	44.7042																											1532.1	23.2									1010.4	16.8	1084.6	10.3	1941	36	1911.6	21.23	1618.5	10.7	1929.76	17.9147
1008.33	35.0022																											1536	28									1012.5	19.1	1380.9	9.3	1309	27	1838.5	15.6	1604	15.5	1935.59	10.0565
1011.23	62.3668																											1576.6	36.3									1013	17	1134.1	7.6	2931	48	1969.6	12.97	1661.7	12.1	1937.67	11.5049
1012.42	54.678																											1598.8	21.3									1014.3	16.8	1162	5.1	1344	33	1828.4	34.82	1625.8	11.9	1945.68	9.87968
1012.48	28.4674																											1602.4	34									1015	19.9	1136.9	10.1	1773	33	2047.9	34.1	1653.4	19.5	2011.99	20.6187
1016.66	98.1726																											1603	27									1015.1	14.1	961.9	7.2	1262	24	1992.9	14.06	1631	14.3	2070.93	20.9716
1019.45	58.7883																											1613.2	26.4									1015.6	13.1	1147.8	7.1	1868	35	2105.9	22.03	1616.8	10.3	2077.26	20.7832
1020.6	34.2832																											1624.6	32.1									1016.3	13.6	1041.5	5.1	1891	38	2061.1	21.92	1722.7	14.5	2079.43	17.605
1022.04	48.3949																											1624.8	23.9									1020.1	19.3	1025.1	4.6	1283	27	1977.9	39.24	1651.2	13.4	2081.58	11.001
1024.41	62.6536																											1629.8	23.3									1020.3	14.2	1181.3	12.7	1046	31	2313.8	16.59	1916.1	14.3	2088.25	40.2796
1028.21	7.0618																											1633	19.8									1022.1	24.5	570.4	1.9	1199	23	2484	16.39	1925.7	20.4	2094.45	32.8683
1029.33	66.5475																											1633.8	21.3									1022.7	18.1	1157.6	6	986	44	2562.9	37.6	1753.9	19.1	2096.94	10.7277
1035.54	30.1189																											1638.4	22.9									1023	15.7	933	8.2	1085	20	2593.5	23.22	2085.8	13.2	2102.51	13.7018
1036.1	48.2193																											1642.2	23.4									1023.1	18.8	958	9.6	1026	18	2679.9	15.63	1804.8	19.8	2192.13	17.3839
1036.48	47.3486																											1643.3	22.7									1023.2	20.5	1167	7.8	1878	33	2700.6	13.99	1765.8	10.5	2314.73	8.19831
1040.59	59.7448																											1644.1	31.6									1024.1	19.3	1185.3	9.4	1352	33	2776.1	21.6	1961.7	10.7	2355.23	12.1868
1041.82	33.2586																											1645.5	30.5									1025	13.5	941.5	8.1	2672	44	382.2	4.83	1931.6	13.9	2419.47	16.9698
1041.99	43.8443																											1646	29.1									1025.2	18.3	1022.9	9	1065	22	395.7	6.97	1975.4	13.8	2471.92	12.8022
1043.21	54.1989																											1647	22.7									1025.6	13.9	1346.9	19.2	1010	19	397.6	3.6	1963.7	13.1	2562.58	5.85667
1046.54	25.5778																											1652.8	34.8									1026.7	19.2	1164.8	16.3	1866	39	400.3	4.96	1861.4	13	2563.83	8.10766
1049.61	51.4752																											1664.6	31									1027.9	18	603.6	1.8	1065	24	431.4	9.39	1876.5	13.5	2567.02	13.7765
1053.88	34.1444																											1667.5	37.2									1029.2	15.2	1112.4	8.9	1120	22	463.1	6.68	1986.4	11.6	2608.17	16.6602
1055.59	44.5754																											1672	29.7									1030.1	18.3	1206.5	13	2630	46	472.7	9.78	1868.7	13.8	2617.66	65.9383
1056.46	54.7828																											1679.7	34									1030.4	15	1324.5	15.3	2676	55	511.3	10.28	1992.3	12.7	2631.87	17.6134
1060.5	50.2466																											1683.1	24.6									1030.6	13.1	984.3	11	1156	41	580.2	15.32	1976.1	13.3	2648.47	16.5895
1065.91	14.8944																											1687.9	26.7									1031	18.7	1119.4	6.7	1107	25	1799.8	36.2	1973.3	14.7	2650.59	19.1647
1066.04	37.6675																											1689.9	18.8									1031.3	16	1176.9	4	1008	20	1181.6	41.19	1983.4	10.8	2651.93	26.7087
1067.7	51.9971																											1691.7	23									1031.5	18	1116.9	10.5	1240	23	1199.4	50.44	2017.6	12.8	2658.83	30.8511
1068.83	28.2639																											1695.9	29.8									1031.6	15.7	1231.2	29.7	1304	23	1151.6	66.94	1978.9	15.2	2665.09	23.6888
1070.34	39.1194																											1700.8	38.8									1032.3	17.2	592.7	2	1576	30	2830.5	36.18	1987.2	14.5	2666.95	21.8632
1070.81	24.8365																											1700.8	26.3									1033	17.4	961	16.3	1047	60	1015.9	31.68	2008.8	18.2	2667.53	35.1175
1072.22	24.3469																											1701.6	33.5									1034.3	19.5	1196.8	8.4	1046	24	927.6	112.48	1969.3	14.2	2674.56	26.3224
1074.05	53.4547																											1704.5	29.7									1034.3	24.6	1062.6	13.3	2704	48	1115.7	43.45	1981.6	10.2	2678.27	5.94416
1075.29	72.9554																											1707.5	22.8									1034.6	16.8	1053.8	12.2	1052	20	1212.5	31.21	1951.4	10.2	2683.04	4.15158
1075.67	48.5215																											1714.7	26.8									1037.4	19.1	1338.8	12.9	1209	24	1288.5	39.98	1953.3	12.7	2683.36	17.8651
1077.94	45.634																											1717.9	21.5									1038.2	13.8	1198.8	10.6	1851	31	1396.7	99.09	2033.6	12.3	2683.98	34.9514
1078.98	38.9418																											1724.7	22.1									1038.4	17.3	1451	23.4	1776	32	1528.2	51.09	2007.2	9.3	2689.62	57.5334
1079.7	35.7424																											1749.1	19.6									1039.3	23.4	1049	11.8	1219	28	1199.4	36.67	1983.2	12.1	2691.71	16.5325
1081.4	20.5586																											1756	25.9									1039.6	18.5	1343.5	9	1770	29	1863.3	31.86	1988.8	13	2692.58	5.83956
1081.66	69.6625																											1760.7	19.7									1039.6	20.4	1353.9	8.7	2803	44	1187	35.54	1987.2	12	2692.75	29.0814
1082.13	26.8825																											1771.7	16.1									1040.6	25.7	1240.8	13.6	1048	18	1336.6	30.58	2410.2	14.5	2693.22	16.5264
1083.48	77.851																											1779.6	19.4									1041.6	21.4	1209.3	12	1638	28	1305.7	66.27	2677.5	13.3	2694	26.2682
1088.6	166.691																											1780	21.3									1042.1	20.9	964.8	3	2799	57	1535.8	48.11	2466.7	9.1	2694.11	25.9382
1090.28	54.1986																											1783.4	26.8									1042.6	14.7	1251.7	11.8	1540	32	1800.3	36.99	2504.2	11.7	2695.36	17.6718
1098.63	12.62																											1799.7	22.1									1043.1	17.8	1745.2	8.1	1764	32	1632.1	23.76	2696.6	11	2698.76	20.3118
1106.15	31.2946																											1810.2	17.1									1043.4	22.2	1392.6	12.4	1052	20	1831.5	29.18	2658.9	14.1	2699.09	9.3621
1106.54	48.6233																											1812.1	18.2									1043.8	18.7	1075.9	9.7	1014	37	1599	31.97	2748.6	12	2699.13	6.69808
1116.17	16.9482																											1815.9	31									1043.8	16.7	1015.9	2.6	1293	23	2030.4	39.66	2747.8	11.1	2700.58	7.42823
1116.87	55.2034																											1876.6	20.6									1043.9	14.4	1186.1	5.3	1036	23	1841.1	34.57	2733.9	9.4	2701.42	17.8284
1117.67	46.5497																											1879.2	25.7									1045.1	19.5	1720	9.7	980	29	1875.3	35.23	2695.9	9.2	2704.08	8.23997
1117.95	49.9499																											1885.5	25.1									1046.6	21	944.5	10.8	1132	22	1908.4	32.37	353.7	9.4	2704.81	20.8147
1129.2	47.1533																											1889.4	22.3									1046.7	24.8	1064	8.2	1829	36	1892.5	24.66	367.5	5.5	2706.42	8.84348
1130.42	59.8004																											1975.1	24.7									1047.3	16.9	1217.1	7.3	2620	50	1786.8	32.09	370	12.4	2707.01	16.5013
1144.3	55.9952																											1977.2	27.9									1047.9	15.8	1298.8	7.9	1984	55	1865	24.73	403.8	9.8	2707.1	13.7661
1148.32	82.3809																											2024.6	22.3									1048.7	17.9	1306	7.8	1454	26	1889.4	58.06	403.8	13.7	2708.44	8.54592
1151.78	30.4901																											2098.1	54.5									1049.1	33.3	1425.7	13.4	955	18	1945.9	21.99	406.9	14.2	2708.47	7.11421
1156.46	43.3277																											2112.6	19.6									1050.5	13	1432.9	14.5	2304	44	1843.5	24.75	409.5	8.9	2709.46	4.3905
1158.3	49.3699																											2116.1	266.4									1051	29.1	1171.3	7	2535	42	1873.1	81.42	413.3	9.9	2711.56	10.1296
1168.98	57.5987																											2558.7	22.6									1052.2	17.4	1002.4	6.6	1896	33	1907.4	24.54	429.6	10.5	2711.87	16.492
1177.24	28.835																											2594.8	20.8									1052.3	21.3	1406.1	10.4	3094	51	1849.9	29.99	437.5	6.8	2712.5	4.87679
1178.89	41.0627																											2608.5	26									1052.4	15.1	1213.5	5.4	2658	44	1850.5	31.4	441.1	6.3	2713.12	8.95273
1182.42	36.3948																											2611.3	16									1053.3	16.1	971.9	25.6	1783	31	1795.5	36.34	457.3	6.1	2716.11	5.06324
1190.27	43.0507																											2681.1	21.3									1053.7	13.8	1412.7	6.7	2714	51	1769.1	34.01	485.9	24.3	2717.45	9.30515
1190.68	24.7209																											2695.6	20.6									1054.8	21.1	1109.6	8.8	1888	32	2086.1	23.12	496.2	28.1	2719.51	17.8007
1190.73	10.4957																											2700.5	17.6									1056.1	17.6	1479.1	5.8	2598	42	2034	24.98	504	7.5	2720.11	23.0731
1194.91	21.1834																											2703	23.1									1056.3	15.2	1358.4	13.5	1295	23	1873.2	26.16	508.4	8.6	2720.38	24.5573
1202.8	59.3926																											2708.1	19.1									1057.1	19.6	1006.5	7.3	2691	50	1958.6	30.72	513.9	8.2	2723.32	16.6386
1206.82	21.1902																											2709.2	16.1									1057.3	16.8	1272.4	20.5	979	29	1975	49.27	526.7	12.5	2723.64	23.1557
1206.97	28.6641																											2713.9	17.3									1060.1	18.7	1110.2	10.1	1022	21	1856.3	31.08	529.5	9.7	2725.01	23.7221
1215.33	40.0726																											2714.5	22.2									1060.2	13.4	1834.8	8.4	1016	22	1781.4	44.93	530.1	9.1	2725.1	12.2356
1215.44	71.6896																											2717.2	13.4									1060.6	16.8	1405.2	7.9	1046	28	1961.9	30.55	530.2	5.5	2726.76	19.1053
1230.06	43.705																											2718.3	21.2									1061.8	21.7	1224.4	16	1045	20	2001.7	26.28	531.5	17.6	2727.54	11.452
1233.12	68.482																											2728.4	21.2									1061.9	21.1	1214.7	16.8	1045	19	1795.9	59.06	533.3	6.2	2728.62	11.9464
1238.26	57.9826																											2742.2	19.6									1063.3	16	1001.4	23.6	1013	20	3020.4	26.91	533.5	12.6	2729.15	30.136
1243.98	39.4559																											2744.9	16.6									1063.5	17.2	1261.7	12.2	1018	19	1962.3	52.22	535.1	8.8	2730.27	7.49342
1245.51	46.1903																											2754.5	22.6									1063.5	15.6	1198.7	10.9	989	19	2062.3	27.94	535.9	8.7	2736.42	38.6771
1245.54	71.1761																											2773.7	16.8									1064.6	15.4	1510.7	15.2	1007	27	2190	18.89	537.1	8.9	2738.2	9.30207
1250.87	26.4404																											2781.3	18.5									1064.8	20	1043.9	4.2	1153	23	1807.2	37.39	538.5	7.1	2739.27	7.52305
1255.87	34.4183																											2789.4	15.1									1066.4	23.5	1097	8.4	1054	24	2571.7	22.58	539.5	8.2	2739.3	26.329
1259.94	26.739																											2790.9	17.9									1067.5	16.8	1172.4	12.3	1012	21	1938.4	53.26	540.5	17.8	2743.81	10.5928
1268.13	29.3551																											2804.7	19.7									1068.5	17.8	1216.3	17.7	1055	23	2085	64.51	552	5.3	2743.86	23.3564
1275.3	73.4038																											2817.1	30.8									1068.7	18.6	1477.5	16.1	950	21	1980	71.78	566.3	7.6	2745.18	13.3908
1307.6	34.089																											2836	18.5									1068.7	16.3	1382.5	5.3	2734	49	2186.7	23.42	568.5	28.6	2747.8	10.5324
1315.17	45.4651																											2943.3	16.2									1068.8	18.1	1112.8	8.1	1621	33	2339.5	19.33	577.5	19.7	2748.84	16.9217
1324	67.2521																											2949.6	11.9									1069.3	24.5	1967	7.4	1630	33	2410.9	17.78	593.6	8	2749.67	6.04638
1326.91	31.2519																											2966.2	18.4									1069.7	23.8	1395.1	8.7	1079	20	1859.5	48.75	593.8	9.2	2750.61	29.7468
1358.18	17.4714																																					1070.2	18.3	1137	10.7	1043	23	2368.3	30.79	598.7	9.3	2755.54	16.4298
1365.29	87.0353																																					1070.6	25	1132.4	6.1	1001	28	2462.9	24.55	599	8.8	2760.82	10.93
1380.37	36.2762																																					1070.8	15.2	1227.1	10.7	989	21	2373.1	29.64	602.5	8.9	2772.66	21.3581
1394.45	34.0621																																					1071.1	16.4	1028.3	12.9	1030	23	2478.2	23.06	607.8	5.7	2777.19	16.3932
1402.89	69.2375																																					1071.5	17.5	1814.3	19.9	1075	27	2379.3	26.21	611.9	14.8	2777.5	7.73318
1408.08	39.5595																																					1072.1	15.5	910.8	18.2	1485	28	2586.3	20.65	614.6	20.1	2782.45	17.0401
1410.01	52.7296																																					1074.4	13.5	1159.7	7.3	1115	21	2091.8	47.81	615.6	15	2809.14	17.1006
1411.18	29.034																																					1074.7	20.5	1123.9	5.6	1821	33	2526.4	26.9	616	14.6	2828.43	10.7491
1418.07	44.854																																					1075.6	20.5	1219.4	19.4	1015	32	2572.4	22.69	616.7	20.1	2829.26	22.189
1418.68	15.1498																																					1076.1	15.3	1173	8.7	968	98	2594	24.3	643.7	9.7	2839.57	4.60392
1431.85	64.6516																																					1077.1	28.6	2129	13.5	1131	21	2684.3	18.93	646	10.5	2847.98	11.1489
1433.08	43.0392																																					1077.7	17.9	990	6.4	2779	49	2523.9	20.61	650.3	9.2	2848.79	25.0863
1437.7	19.208																																					1078	19.7	1164	8.2	1035	19	2743.5	25.32	667.3	9.7	2853.24	9.26538
1442.15	7.25206																																					1078.1	23.6	1252.5	28.7	2675	50	2626.4	41.91	695.4	22.7	2859.25	39.5507
1445.82	18.7071																																					1078.3	15.9	1248.2	15	1040	21	2659.9	34.61	970.4	13	2882.26	16.0225
1446.8	49.985																																					1078.6	16.7	1441.6	9.2	962	23	2809.7	29.19	951.8	18.2	2887.29	22.0829
1450.29	32.8948																																					1079.1	15.6	716.9	7.9	1165	21	2666.9	25.37	999.5	17.7	2919.86	10.0109
1454.02	18.7481																																					1079.4	18.1	961.8	17.2	1165	25	2701	25.75	974	15.7	2920.09	16.8896
1456.17	60.4192																																					1082	16.9	1289.7	5.3	1118	23	2658	38.61	971.2	14.9	2923.54	5.14606
1457.02	35.7738																																					1082.1	15.1	968.7	6.8	1364	31	2985.4	28.72	1020.2	16.7	2927.11	20.7076
1461.16	29.1982																																					1082.8	23.6	1511.3	8.3	1054	19	1043.9	44.72	1013.7	16.9	2940.89	5.21532
1474.81	33.1946																																					1084.2	18.6	995.5	9	1782	30	1169.8	28.1	1211.2	17.8	2945.43	5.82298
1515.36	18.7003																																					1084.8	21.7	2071.8	7.5	1835	31	1355.1	34.52	1089	13.3	2963.34	17.252
1525.81	31.1111																																					1085.6	18.8	1437.1	8.1	2667	45	1856.6	11.31	1075.5	12.3	2975.31	19.8136
1529.13	54.0072																																					1087.2	15.3	1174.8	4.2	1834	32	1726	22.84	1062.8	17.1	3065.27	17.7697
1566.47	28.4202																																					1087.6	17.6	1001	15.1	1827	31	1762.2	12.66	1123.9	14	3218.79	6.89302
1572.66	10.381																																					1089.3	19.6	1042.2	4.7	2646	44	1864.3	22.75	1114.3	12.9	1050.29	46.6592
1622.59	43.9357																																					1090	24.2	1286.1	15.4	1835	31	1777.2	15.47	1197.5	13.2	1784.93	24.3605
1626.95	42.7631																																					1091.2	16.2	1329.9	13.6	2394	43	1757.9	18.59	1166.3	15.4	1790.05	9.69003
1637.27	83.3258																																					1094	13.3	1157.5	6	1423	25	1797.3	16.67	1242.8	12.2	1795.42	9.91291
1637.63	15.3192																																					1095.5	16.5	1052.9	17.5	2692	46	1876	16.18	1299	15.5	1807.6	15.2864
1646.56	19.0535																																					1096.2	16	1176.6	16.1	382.059	5.83206	1805.1	18.97	1314.9	15	1827.53	50.8079
1650.05	27.9753																																					1096.7	17.7	1054.7	20.7	381.73	4.78281	1846	13.03	1368.7	9.2	1831.07	5.49763
1656.76	66.3903																																					1097.5	18.8	1040.4	8.8	383.611	4.75658	1891	42.33	1359.3	13.8	1838.31	16.0628
1663.15	18.4684																																					1099.3	24.5	1314.2	15.1	383.737	4.75951	1822.3	12.19	1446.5	15.5	1844.75	17.6293
1664.37	44.0332																																					1099.3	16.1	1241.7	17.8	390.465	5.74269	1897.2	14.19	1516.6	9.8	1850.08	16.0671
1668.29	25.8948																																					1102.2	17.2	1009.8	7.8	395.703	6.28689	1823.7	29.53	1517.4	13.9	1859.55	14.7713
1669.59	13.2771																																					1108.8	17.1	1456.8	12.9	392.97	4.87884	1752.6	11.82	1466.5	14.3	1859.86	4.55466
1681.13	9.93001																																					1109.1	17.5	1057.1	17.6	393.501	4.88189	1840.4	38.6	1771.3	12	1861.7	17.5965
1685.13	14.3376																																					1111.6	12.3	1288.2	7.8	413.879	4.90465	1770.5	15.12	1681.6	9.5	1867.89	15.8057
1689.91	14.9607																																					1113	17.6	1238.1	18.3	424.699	4.22184	1750.4	9.93	1587.1	13.1	1870.83	19.4691
1696.5	32.8599																																					1113.3	17.2	1155.8	8.8	479.162	7.96242	1871.8	13.95	1657.6	12.3	1872.77	19.3652
1708.72	16.8589																																					1115	21.9	1276.3	12.5	487.975	5.43851	1892.4	15.09	1646.4	11.4	1873.36	26.1882
1722.69	15.5457																																					1118.7	19.7	3781.1	8.2	489.453	6.76894	1849.6	13.36	1639.5	10.7	1877.36	39.0073
1738.86	23.5372																																					1119	16.4	1004.8	7.8	489.306	6.48306	1868.8	11.26	1642.7	12.8	1878.86	9.86491
1743.31	30.9134																																					1119.1	15.9	1217.8	11	492.976	6.73975	1881.8	25.55	1574.7	12.9	1879.41	24.8955
1747.31	12.5416																																					1121.3	17.6	1370.8	13.1	492.962	6.66621	1829	14.18	1711.9	17.5	1882.51	10.0372
1755	3.80056																																					1121.4	18.6	1480.1	7.1	497.024	5.10252	1825.6	16.99	1740.1	12.7	1883.27	19.1031
1762.92	9.43233																																					1123.8	53.8	1152.7	9.1	495.822	5.0602	1924.3	12.87	1923	14.5	1886.47	40.6641
1791.04	17.856																																					1126.4	15.8	1006.3	8.5	505.683	7.73882	1901.1	16.04	1793.8	12.4	1898.66	18.6186
1792.28	31.9801																																					1129.5	19.5	1119.2	25.1	509.674	9.23178	1893.4	17.25	1647.8	13	1905.3	17.8947
1823.19	11.4524																																					1129.6	19.1	1187	6.4	518.652	5.96427	1929.1	14.77	1993.6	12.6	1956.67	7.02539
1847.19	17.672																																					1130.6	20.4	1222.6	7.7	518.933	5.92958	1895	13.08	1968.1	12.8	1973.41	22.562
1851.22	14.064																																					1134.4	14	1189.5	13.9	524.672	10.6727	1883.1	31.81	1986.8	10	2565.83	5.94794
1877.16	24.7009																																					1137.4	17.9	1217.3	5.7	527.731	6.32375	1929.3	23.46	1905.5	8.8	2587.93	7.40166
1878	10.3983																																					1139.6	18.7	1422.8	13.2	526.358	5.42507	1904.4	16.26	2663.9	9.6	2592.4	16.4605
1881.87	70.4652																																					1139.7	16.4	1373.9	11.7	532.667	6.81244	1814.6	16.54	2725.1	8.5	2611.47	7.83116
1896.93	45.562																																					1140.3	16.5	1460.6	7.7	560.161	7.47895	1944.6	24.44	3161.5	11.9	2627.14	8.69711
1900.39	6.66419																																					1140.5	15.5	1045.4	12.8	571.24	8.25179	1907.4	23.27	422.1	4.2	2668.84	7.67264
1915.21	9.36416																																					1142.1	24.3	1098	9.7	576.969	8.03757	1920.4	23.07	505.5	16.7	2670.92	8.22306
2004.55	21.2657																																					1145.1	21.9	964.8	6.5	576.112	9.28637	1989.1	12.32	705.4	12.2	2671.06	21.0801
2096.04	2.78102																																					1145.4	19.2	1460.5	5	574.885	7.23438	1992.8	18.17	731.3	9	2671.9	16.2103
2180.15	8.48703																																					1147.6	17.6	1371	10	574.909	7.26192	1923.1	30.06	761.7	10.1	2675.02	24.4269
2692.38	12.7948																																					1149.1	14	1783	11.2	591.177	10.0129	2005.4	10.66	890.7	12.8	2676.41	5.84666
2695.21	10.2448																																					1149.5	13.6	1282.4	9.7	590.69	7.71062	1944	17.8	966.9	13.3	2678.55	6.82891
2704.96	12.1648																																					1149.8	16.5	1483.5	9.5	589.574	7.49208	1989.9	41.43	931.4	16.9	2680.8	6.58397
2712.17	8.03046																																					1150	21.1	1309	4.3	617.615	9.17462	2029.4	9.05	1068.3	10	2695.23	12.1318
2768.03	8.83687																																					1152.5	18.6	1008.3	8.7	633.239	6.73009	2009.9	13.66	994.8	16.5	2696.09	6.63316
2782.09	37.6981																																					1155.5	15.1	1102.5	14.1	657.73	7.85151	1977.9	22	1032.1	6	2699.8	4.44153
																																						1155.6	14.9	1041.8	3.5	720.162	8.0125	2036.7	20.55	1061.3	15.4	2704.14	24.9953
																																						1156.1	17.5	1136	13.2	722.902	8.72479	1866.5	33.19	1087.3	19.9	2704.71	19.9995
																																						1156.5	15.8	1145.7	7.5	834.754	9.14905	1948.5	32.69	1012.8	16.4	2706.02	9.50265
																																						1158.4	16.6	1063.9	24.8	839.995	8.90084	1978.5	28.13	1058.8	14	2709.35	8.07289
																																						1159.3	14.9	1384.7	20.4	868.837	7.51329	2099.8	7.64	1076.4	14.7	2710.06	4.95296
																																						1159.4	20.9	1020.8	19.9	881.728	9.34345	2070.9	15.67	1038.5	19.3	2710.47	25.4379
																																						1159.6	17.6	1121.2	7.6	900.783	12.2147	2071.6	26.69	1132	26.1	2710.59	4.37519
																																						1160.6	15.9	1355.4	15.5	906.01	10.608	2191.8	19.66	1071.3	15.6	2710.97	7.56629
																																						1161.7	31.8	1127.2	13.8	912.167	10.7951	1891.5	81.85	1071.5	16.9	2711.85	4.88991
																																						1164.1	17.5	1086.1	5.7	916.327	8.95196	2302.4	8.2	1142.6	15.3	2711.85	5.81291
																																						1164.1	20.2	1305.2	13.3	920.264	8.60459	2635.9	8.36	1086	17.3	2712.16	8.14926
																																						1165.6	14.4	1751	23.3	921.972	10.2005	2299.8	9.9	1072	19.6	2712.41	7.07667
																																						1166.1	19.8	1499.1	13.6	922.755	10.5905	2092.6	52.18	1151.2	11.4	2715.79	10.2375
																																						1166.7	17.3	1169.6	12.2	931.203	9.62416	2486.7	7.98	1099	13.1	2717.99	13.7327
																																						1166.8	16.6	1502	10.7	931.333	9.6382	2551	18.69	1134.5	15.2	2718.93	5.84769
																																						1168	12.4	1415	14.8	942.79	10.2849	2483.8	10.42	1133.9	15.8	2719.04	17.5439
																																						1168.8	19.3	625.6	4.1	946.021	9.41216	2667.5	16.54	1215.9	14.6	2719.56	11.9866
																																						1169.9	11.6	1783.8	8.9	950.542	9.99366	2485.1	10.54	1175.1	21.4	2721.4	9.44208
																																						1171.5	35.6	1139.7	9.2	956.149	10.9017	2562.2	9.58	1134.6	10.7	2724.48	10.5252
																																						1173.7	24.6	1340.6	7.7	956.409	10.8837	2622	8.41	1201.3	13.6	2724.68	5.89669
																																						1174.8	17.7	1379	5.6	967.06	8.76362	2565.3	13.46	1262.3	16	2726.35	8.96443
																																						1175.4	14.8	1170.3	6.5	969.888	9.90132	2673.1	14.83	1140.4	19.7	2726.42	4.16789
																																						1180.3	16.5	1514.7	10	1021.11	12.7773	2533.7	9.75	1174.1	15.2	2727.84	15.0687
																																						1180.4	13.4	979.8	6.7	1060.13	11.4743	2701.4	13.68	1271.2	22.1	2728.73	24.7061
																																						1185.1	18.6	1141	26	1064.13	11.0525	2700.3	9.89	1330.7	11.1	2729.85	6.31111
																																						1187.2	15.8	1225.9	7.8	1116.35	9.91582	2676.2	13.05	1330.6	16.1	2731.35	13.4534
																																						1191.4	18.6	2008	20	1132.67	13.987	2794.4	16.16	1382.1	11.1	2731.42	5.03104
																																						1192.8	20.4	1536.7	7.9	1151.93	12.6277	2852.7	16.64	1371	16.1	2733.1	4.65967
																																						1193.7	15.1	1181.7	6.4	1156.32	11.8428	2741.1	25.69	1335.5	6.4	2734.82	7.09006
																																						1194.9	17.4	1226.8	33.5	1162.31	14.363	2911.8	13.31	1389.2	17.9	2736.19	13.0177
																																						1197.8	18.6	1660.4	8	1178.54	10.7998	371.4	2.41	1464.4	11.4	2740.68	9.75417
																																						1202.6	18.9	1737	10.5	1179.53	10.5267	380.3	3.96	1473.8	12.9	2743.82	12.0784
																																						1202.8	29.7	1205.9	14.8	1200.38	14.2742	387.6	3.07	1450	12.5	2744.09	25.6907
																																						1203.9	24.2	1418	26	1265.03	16.1288	432.8	4.33	1436.5	17.7	2744.43	14.018
																																						1210.5	21.8	1171.3	8.8	1277.16	14.1062	445.4	3.94	1453.7	14.9	2744.62	4.61331
																																						1212.9	31.5	1130.2	10.8	1309.76	12.3224	662.3	7.41	1508.9	13.3	2745.15	6.22262
																																						1215.8	15.4	1856	28.1	1471.68	12.4956	838.5	3.34	1505.6	13.3	2746.23	8.60955
																																						1226.5	20.9	1121.3	5.5	2042.86	16.0884	1104	22.99	1500.2	12.9	2746.76	9.71625
																																						1227.9	18.5	1090.5	6.7	482.6	6	1217	58.31	1636.2	21.1	2747.2	11.6422
																																						1229	23.6	1215.7	9	538.8	3.6	1173.9	20.35	1589.7	18.6	2748.15	9.01989
																																						1229.4	17.8	1568.8	8	552.9	7.7	1159.6	40.95	1644.8	10.8	2749.18	12.8336
																																						1232.1	14.3	1070.8	11.2	601.1	4.65	1291.3	21.09	1526.8	12.5	2753.61	9.5113
																																						1232.3	12.4	1604.3	7.3	625.1	10.1	1252.6	33.3	1715.7	16.5	2756.85	6.87373
																																						1244.7	14.9	1043	5.8	648.4	9.8	1260.1	25.84	1609.7	9.7	2764.14	51.2785
																																						1246.3	17.2	2527.2	3.7	662.6	3.5	1340	30.15	1615.4	7	2781.7	5.98485
																																						1246.3	20.1	1041.6	7.7	794.8	10.6	1475.6	26.82	1630.1	18.2	2785.32	21.3094
																																						1247.6	20.3	1370.9	6.3	1021.2	22.95	1412	25.77	1649.2	16.2	2788.54	9.55639
																																						1248.3	17.7	1244.5	29.3	1044.7	20.9	1878.2	20.06	1651.8	10.6	2801.69	11.655
																																						1253.1	22.2	1443.8	17.8	1056.9	18.8	1630.1	27.21	1702.6	8.8	2812.26	11.032
																																						1255.6	10.8	1247.6	11	1066.5	15.2	1666.3	20.26	1651.3	18.9	2821.55	10.3357
																																						1260.8	13.1	1107.6	7.2	1106.9	10.25	1776.2	16.56	1763.1	6	2836.85	26.015
																																						1263.2	21.6	1403.6	6.3	1113.3	14.65	1856.2	25.65	1668.9	6	2841.92	6.18002
																																						1266.7	20.4	1172	4.2	1135.2	19.75	1765.9	28.46	1739.8	12.9	2859.44	6.2204
																																						1271.5	17.3	1806.9	10.3	1165.4	14.25	1814.9	27.37	1736.4	9.8	2882.48	8.58147
																																						1275.5	14.7	1079.8	11.8	1191.1	9.2	1891.9	32.21	1966.4	17.5	2905.58	9.91179
																																						1276	15	1433	19.2	1194.1	9.95	1949.3	16.21	1927.6	10.7	2934.07	10.9736
																																						1276.6	15.6	554.4	2.3	1221.6	15.7	1828.9	32.14	1776.9	9.7	2976.4	4.11583
																																						1289.6	15	1145.9	13.3	1230.3	14.8	1855.3	21.67	1788.7	11.7	2990.9	8.2769
																																						1296.2	17.4	1292.4	8.2	1257.5	15.8	1810.8	21.78	1746.8	5.3	3040.15	14.4161
																																						1300.2	15.5	1109.9	4.7	1262.4	22.4	1849.5	24.38	1926.8	12.5	493.193	34.9641
																																						1308.5	17.5	1447.5	13.1	1263.4	16.2	1927.1	30.93	1860.9	5.3	515.132	7.3321
																																						1317.8	17.5	1479.1	5.4	1322.2	22.9	1818.4	29.27	1954.4	18.2	1066.24	36.1361
																																						1318.4	22.4	1107.3	14.5	1369.5	16.3	1866.1	33.27	1976.5	12.1	1075.17	66.1687
																																						1318.9	15.8	1099.9	5.9	1409.8	26.45	1785.3	32.44	1962.6	16	1133.24	91.0904
																																						1320	17.2	1439	6.9	1438	55.05	1842.3	22.88	1810.7	4.7	1135.06	72.0927
																																						1320.8	16.5	1064	8.6	1481.5	6.15	1837.9	22.51	1992.9	18.3	1199.19	29.8286
																																						1321.2	21.3	1340.7	21	1527.7	13.85	1761.6	41.22	1921.6	16.8	1200.08	31.7819
																																						1321.8	18.3	1086.3	12.6	1646.9	21.35	1813.6	23.71	1954.7	16.7	1214.1	39.9757
																																						1324.3	17.1	1301.9	6.9	1688.7	6.65	1826.1	22.26	1867.8	14.4	1221.5	39.6719
																																						1324.4	12.2	1366	12	1704.4	17.95	1825.3	26.33	1984.1	14	1309.58	61.2127
																																						1324.5	14.3	1233.2	7.2	1764.9	6.6	1801.4	24.29	1930.9	15.8	1325.85	56.5722
																																						1326.2	19.8	1230.7	7.3	2094.8	9	1841.9	43.04	2016.2	13.8	1336.48	72.3339
																																						1326.5	14.3	1137	7.2	2214.8	7.65	1954.3	20.23	2005.2	6.2	1363.22	57.1487
																																						1338.9	17.9	998.6	11.5	2516.2	9.75	1937.9	19.97	1979.9	17	1383.92	33.781
																																						1339.1	50.9	1159	15.5	2528.5	4.5	1863.8	21.54	2051.1	14.2	1384.52	89.0796
																																						1345.8	19.9	1142.4	6.7	407.507	6.80539	1932	19.3	2080.7	11.4	1391.17	17.4528
																																						1356.4	20.8	1417.8	8	408.858	4.47696	1910.8	18.01	1967.6	16.1	1394.41	59.6023
																																						1362.7	36.4	1020.2	3.6	419.696	3.43737	1921.5	23.21	2064.5	12.3	1394.74	79.4392
																																						1365.7	14.2	966.3	8.8	420.88	2.38405	1898.3	18.38	2022	17	1401.71	38.7222
																																						1368.7	17.6	1062.4	12.4	432.407	4.08343	1902.8	20.76	1979.3	12.7	1404.38	102.836
																																						1377.6	22.2	1331.6	8.8	435.009	3.97718	1932.7	30.44	2610.8	11.1	1409.62	28.7192
																																						1378.7	18.6	1136.3	9	433.98	3.44015	1931.4	30.71	2514.5	17.2	1410.4	36.9163
																																						1379.7	13.5	1089.6	4.5	434.554	2.81323	1975.8	22.3	2760.9	12.9	1411.09	32.2491
																																						1381.8	16.7	941.8	10.8	435.885	5.34349	2064	26.76	2922.1	14	1413.91	23.9065
																																						1384	14.9	970	6.8	436.587	2.66362	2232.9	23.79	2721.2	9.8	1415.48	95.1015
																																						1385.1	17.7	1176.3	5.8	436.269	3.5626	2320.6	29.06	2756.3	15.9	1421.59	28.4499
																																						1386.5	15.6	1462.1	14.2	438.397	2.64198	2294.9	24.78	2872.5	9.9	1422.72	48.1271
																																						1388.8	21.2	1068.4	13.3	440.633	2.34904	2307.9	20.09	2880.7	15.1	1423.61	62.2755
																																						1394.3	16.7	1181	16.7	442.328	3.34998	2309.9	24.86	2980.3	11.6	1426.37	31.148
																																						1397.4	16.7	1042.6	9.1	445.365	4.36711	2359.1	31.75	2998.8	5.2	1427.35	86.2465
																																						1398.1	14	1164.5	3.2	446.342	4.71652	2353.5	24.11	369.4	5.7	1428.87	42.8077
																																						1400.3	18.2	1370.1	15.5	448.087	4.55862	2374.2	16.42	370.8	3.6	1429.22	34.8443
																																						1402.1	23.3	1086.3	3.3	452.876	3.54325	2456.1	21.48	394.5	3.8	1430.59	47.1819
																																						1403	13.5	1312.5	15.6	451.031	6.11707	2602.6	22.87	410.8	5.4	1432.22	54.0581
																																						1405.8	16.9	1176.9	4.7	461.572	6.36242	2711.6	12.43	420.5	3.6	1432.79	17.4766
																																						1411.9	17.9	1446	9.7	462.839	6.65859	2672.5	23.2	423.9	7.9	1433.59	12.0904
																																						1412.2	16.5	1100	15	463.425	8.45389	2680.6	22.7	467.3	8.6	1435.93	27.7936
																																						1419.2	17.7	1168.2	4.4	465.736	8.524	2665.3	25.01	490.6	6.9	1438.44	42.9247
																																						1422	14.8	1027.7	11.8	484.158	10.2889	414.8	3.79	492.4	8.7	1439.71	21.8216
																																						1427.8	17.1	1604.5	19.5	532.814	4.20743	417	4.75	515.7	5.9	1439.85	28.3783
																																						1438.3	15.8	1151.8	12.6	583.004	4.73846	431.8	7.42	518	12	1440.32	46.8773
																																						1440.2	14.4	1218.4	15.2	595.246	3.74022	433	3.52	523.7	5.1	1440.98	43.04
																																						1441.4	18.2	1400.9	5.6	594.909	3.10144	436.5	4.14	531.7	8.1	1446.47	52.3768
																																						1453.8	19.1	1445	9.8	605.07	7.36249	437.6	2.58	568.8	8.7	1447.89	28.1485
																																						1458.7	17.5	1023.1	10.9	627.541	3.32326	438.4	5.87	582.9	11.7	1448.42	87.6096
																																						1459.5	15.5	1433	5.7	627.74	3.36587	446.4	3.36	629.7	5.8	1449.25	31.2044
																																						1461.8	13.4	1246.2	7.3	633.123	5.04402	450.3	3.58	653.2	9.8	1450.3	20.6352
																																						1468.7	20	1132	6.7	897.467	4.08453	456.6	7.81	658.2	8.8	1450.59	29.483
																																						1468.9	15.6	1081.6	5.7	947.723	4.8898	465.8	3.3	680	13	1452.08	34.9326
																																						1473	15.9	1135.5	9.8	958.729	4.8009	475	15.25	700.5	12.9	1455.26	29.5979
																																						1474.2	17.2	1060.2	14.3	969.247	4.99094	1181.7	87.56	706.4	5.9	1456.38	13.6199
																																						1475.4	12.3	1161	8.8	979.951	5.70386	1134.1	40.6	856.3	16.2	1457.26	12.7688
																																						1476.9	16.5	1314.7	5.9	982.887	5.51877	1152.4	23.14	896.6	12.5	1457.44	38.175
																																						1477.3	17.1	1298.5	15.6	983.031	10.5548	1137.5	29.2	1094.8	23.9	1457.65	38.0374
																																						1478.4	14.5	1107.7	8.8	992.953	16.6437	1256.2	15.02	1020.1	30.7	1457.77	60.0715
																																						1479.2	18	1242.4	17.8	993.826	8.57314	1194.5	44.95	1022.6	28.4	1458.22	63.158
																																						1479.6	13.2	1338.8	9.5	1000.91	10.3141	1147.5	33.25	1049	19.6	1458.9	27.7437
																																						1493.5	15.9	1265.3	23	1006.75	7.69226	1274.6	51.64	1040.2	30.3	1459.13	31.4642
																																						1494.6	17.1	1357.9	9.5	1019.84	13.6809	1244.9	36.47	1061.4	29.5	1461.33	30.5603
																																						1505	32.4	1031.4	4.4	1025.69	5.56646	1318.5	31.31	1050.9	25.4	1463.26	26.9663
																																						1508	17.6	1006.6	8.7	1070.61	4.46501	1489.9	51.52	1063	17.3	1463.98	36.6766
																																						1656.3	14.5	1156.7	11.8	1093.69	7.8405	1421.4	27.08	1135.7	29.6	1465.56	18.8094
																																						1659.1	14.7	1322.9	12.2	1096.78	6.49582	1314.7	36.64	1087.2	17.3	1473.69	29.2068
																																						1714.8	15	1103.2	14.9	1104.94	9.42894	1578.8	30.92	1151.2	24.8	1483.94	88.5819
																																						1734.5	18.6	1085.4	10.1	1111.84	11.9527	1719.1	20.02	1112.7	19.9	1603.54	29.6743
																																						1756	12.1	1154.6	5.2	1109	6.38878	1626.2	27.11	1020.5	18.7	1609.67	89.0982
																																						2550	12.8	1309.4	6.5	1140.34	6.85975	1620	17.25	1166.6	25.6	1613.56	14.667
																																						2633.5	12.3	1074.1	8.8	1141.83	4.40406	1767.8	17.94	1278.1	23	1619.45	80.5713
																																						2633.9	13	1259.6	10.6	1141.45	6.51461	1767.3	41.27	1207	16.5	1620.98	27.3583
																																						2647.5	12.9	1015.3	6.5	1156.08	9.3158	1959.7	34.89	1326.5	22.8	1626.27	29.1867
																																						2694.2	14.3	461.5	2	1157.33	5.78488	1872.1	27.25	1395.5	23.5	1645.71	33.0343
																																						1012.3	17.1	1479	10.5	1247.91	14.3243	1879.2	28.5	1424.9	21.3	1648.81	32.3913
																																						1031.4	16.9	961.7	8.6	1251.44	13.3561	1932	26.05	1397.9	22.3	1654.25	27.6292
																																						1051.9	16.7	1183.2	6	1258.99	6.25883	1885.7	39.15	1372.4	20.6	1656.77	54.4756
																																						1056.3	19.1	1277	8.7	1289.29	5.61253	1845.5	18.37	1315	22.4	1656.98	24.5178
																																						1062.2	18.4	1252.1	4.9	1313.25	5.08736	1843.5	25.68	1449.8	14.4	1658.77	37.8273
																																						1067.4	16.5	1401.3	7.5	1322.03	5.73745	1929.8	30.13	1497.2	22.6	1659.35	23.9088
																																						1074.5	15.8	1144.4	17.2	1325.55	5.72264	1840	16.64	1502.4	21.6	1659.72	47.7932
																																						1079.9	16.7	1077	14.8	1342.44	14.7557	1847.4	18.12	1488	11.9	1662.39	76.2799
																																						1081	14.8	944.4	3	1379.1	6.7422	1763	20.85	1464.5	14.4	1662.81	49.5892
																																						1083.5	15.3	1336.6	6.7	1386.99	6.11266	1755.4	17.49	1472.2	14.7	1663.87	27.9334
																																						1083.8	18.3	1453.8	6.8	1388.97	6.08544	1691	50.97	1564.4	23.1	1665.18	23.4534
																																						1083.8	19.4	1576.5	19.6	1417.7	6.31922	1897.3	42.51	1503.5	20	1665.52	44.3762
																																						1085.4	16.8	997.8	12.3	1412.73	6.00923	1866.9	21.52	1573.3	25.2	1665.54	79.5549
																																						1089	12.9	1019.2	9.4	1411.37	7.72634	1787.2	35.88	1583.9	13.1	1666.34	54.8471
																																						1090.3	16	2178	10.1	1449.14	6.4567	1821.5	22.69	1509	22.9	1667.06	62.8545
																																						1097.1	13.8	1499.6	7.5	1463.52	8.83375	1642.1	29.77	1647.9	22.7	1669.69	42.2121
																																						1102.2	12.8	1340.7	12.6	1554.23	6.02824	1935.9	15.62	1432.4	22.8	1671	51.3858
																																						1113.9	12.9	1361.6	29.2	1579.93	8.06169	1881.7	21.89	1620.2	16.1	1671.97	27.0796
																																						1117.3	19.5	1018.9	6.3	1591.44	11.3609	1782.9	28.07	1641	15.4	1674.26	33.7774
																																						1129.2	19.9	1039.6	6.3	1595.59	6.39671	1725.8	31.95	1627.3	14.8	1674.38	17.6929
																																						1129.5	16.2	1618.3	17.2	1748.17	6.06751	1834	26.14	1644.3	14.7	1677.91	18.9057
																																						1145.1	17.8	1103.2	7.4	1798.69	6.95657	1676.6	37.52	1670.4	12.2	1678.13	32.4032
																																						1172.3	25.1	1006	7	1802.15	10.7548	1944.5	22.72	1669.7	12.9	1678.43	18.0283
																																						1339.7	15.4	1428.2	21.5	1906.32	37.2172	2149.2	19.7	1781.8	15.5	1680	31.1947
																																						1341	14.5	1291.8	10.8	2023.1	19.2096	1874.3	36.44	1665.7	21.4	1680.71	65.3353
																																						1349.9	18.4	1408	8.5	2020.33	6.74205	1934.4	26.92	2000.7	12.3	1680.76	26.5463
																																						1350.8	24.8	1191.3	34	2054.56	9.45035	2500.8	16.28	1717.9	11.6	1683.61	37.4005
																																						1352.6	15.4	1246.6	22.3	2640.58	9.47926	1671.3	66.6	1765.9	11	1683.77	85.3386
																																						1358.4	20.6	1040.2	21.2	2646.57	10.1371	2293.4	12.93	1701.8	22.9	1684.12	22.1877
																																						1364	17	1391.7	5.3	405.878	2.22108	2317.8	16.25	1742.1	21.1	1684.42	29.7076
																																						1368.2	16.5	986	8.1	408.995	3.7262	2532.6	19.36	1771.2	21.2	1685.3	28.4391
																																						1371.9	12.2	1050.2	6.6	412.409	5.53446	2089.3	51.78	1973.1	18.9	1686.51	70.1246
																																						1372.1	12.4	1046.9	8.4	411.663	2.40889	2348	22.7	1937.2	14.5	1687.61	27.3782
																																						1374.5	12.6	1151.5	4.7	419.291	2.81252	2397.2	16.61	1844.5	20.6	1688.22	52.7089
																																						1376.5	14.7	1655.9	9.2	432.976	2.7983	2595.5	16.1	1796.9	15.5	1689.99	49.4857
																																						1376.8	13.5	1240.9	21.8	433.459	3.11108	2715.6	18.18	1736.3	23.1	1693.61	17.1956
																																						1376.8	14.3	896.2	13	434.987	3.13204	2484.3	37.84	1833.9	14.8	1695.24	28.4684
																																						1377.6	15	1090.4	5.8	464.089	11.059	2279.5	38.33	1819.4	20.3	1696.91	19.0019
																																						1381	18	1391.2	7.9	476.049	2.52496	2948.9	17	1871.3	23.4	1697.82	33.4597
																																						1381.9	19.9	1168.9	5.2	516.246	8.70667	2539.4	58.71	1792.9	10.4	1698.08	53.7116
																																						1382.3	16.3	1024	5.2	524.951	10.884	372.5	2.97	1838.3	11.3	1698.53	25.4081
																																						1386.7	13.1	1210	9	557.271	9.77876	379.5	3.33	1991.5	21.4	1701.52	25.0804
																																						1387.3	13.1	1026.2	7.4	571.974	3.86927	381.8	2.43	1880.5	14.8	1704.88	13.571
																																						1390.1	15.9	960.3	10	584.216	4.47905	387.2	2.51	1888.3	14.9	1704.97	17.449
																																						1390.5	14	1409.4	7.1	591.258	3.3255	444.4	5.24	1803.7	14.6	1705.01	16.8451
																																						1390.7	14.5	1142.8	8.4	661.767	7.86137	459.2	3.14	1993.3	22.1	1705.87	33.8172
																																						1396.1	15.7	1158.3	9.4	826.281	13.7095	497.7	6.44	1938.7	12.5	1706.1	49.355
																																						1396.4	12.7	1748.8	27.7	859.047	6.11918	675	4.65	2047.9	11.8	1710.38	49.2842
																																						1444.2	12.1	1359.3	9.1	878.804	5.42467	1012.9	19.35	1945.5	20.6	1710.62	48.9484
																																						1445.7	19.6	893.4	13	882.281	6.49548	1167.5	24.03	1934.1	14.5	1710.98	73.0115
																																						1470.5	14.5	1109.7	6.5	885.585	9.75615	1104.9	71.72	1795.8	21.6	1714.69	52.9013
																																						1471.5	12.7	992.4	9.7	899.195	9.96967	1229.9	30.53	1985.4	14.5	1715	23.6012
																																						1493.2	12.8	998.5	4.9	932.279	6.30155	1146.9	21.13	1972.1	20.4	1715.09	69.64
																																						1502.3	12.5	1033.4	10.3	940.983	4.60378	1178.9	27.58	2356.9	21.4	1717.29	52.7143
																																						1550.6	38.1	952.7	23.4	949.132	4.84336	1106.6	57.11	2613.5	12.6	1717.57	13.8579
																																						1591.5	59.3	1115	16.2	953.007	15.1812	1102.8	27.71	2592.3	13.1	1717.76	25.9766
																																						1856.2	13.5	1175.7	4.4	970.371	5.07129	1216.7	23.06	2613.4	17.4	1718.58	47.0305
																																						2499.2	13	1418.1	23.5	982.516	5.18495	1277	35.68	2490.9	19.3	1718.63	10.7668
																																						2505	11.5	1059.7	10.5	985.895	5.10834	1352.1	27.78	2628.8	19.8	1723.2	29.8769
																																						2604	10.2	1108.5	5.1	988.098	12.634	1542.8	28.82	2764.6	13.6	1723.71	28.5148
																																						2608.5	10.4	1157.6	9.3	987.077	13.0872	1500.8	16.28	2739	20.1	1724.4	58.7693
																																						2616.1	10.9	1197	7.3	988.914	13.1424	2108	20.24	2875.8	13.5	1724.47	47.9798
																																						2620.1	13.2	1094.2	7	1017.41	4.41169	1613.5	19.69	3195.1	16.8	1725.54	28.493
																																						2622.2	11.1	525.7	1.1	1028.96	6.30068	1639.1	21.89	698.3	19.9	1727.27	9.65938
																																						2625.6	14.8	1145.1	8.3	1050.83	5.16171	1629.3	77.11	576.7	14.9	1728.69	39.5609
																																						2640.7	9.8	594.9	5.1	1060.29	5.50114	2688.1	10.62	2971.2	27.9	1729.66	31.163
																																						2641.9	9.6	933.7	6.9	1074.63	5.12621	1788.6	24.57	1455.3	27.7	1733.12	17.5879
																																						2642.2	9.7	1504.4	4.8	1072.19	7.38879	1861.4	21.7	1116.5	14.8	1734.18	51.4518
																																						2643.6	11.2	1466	7.4	1074.38	7.40342	1797.2	41.37	383.4	10.9	1734.34	57.4735
																																						2645.4	10.8	1023.9	8.5	1056.27	17.5317	1880.4	13.86	996.8	26.6	1735.05	54.804
																																						2647.1	11	1019.9	6.2	1087.82	5.6357	1847.9	19.3	2664.6	10.6	1737.76	22.6632
																																						2651	11.6	1050	3.5	1092	8.0446	1883.3	16.38	555.6	19.9	1738.73	18.0443
																																						2651.6	11.9	952.1	11.3	1111.78	20.9313	1906.1	22.36	1862.4	17.2	1741.07	25.8023
																																						2652.8	13.7	1035.8	6.2	1088.13	5.94247	1825.5	21.52	2693	20.9	1741.13	13.4159
																																						2658.4	10.7	1016.8	8.6	1097.38	5.74888	1876.2	22.53	2020.4	10.3	1741.6	24.0999
																																						2660	12.2	1259.7	7.2	1100.17	5.10115	1869	15.14	1835	23.6	1743.52	24.38
																																						2662.4	11.1	1032.9	5.5	1115.25	7.13653	1846.5	9.86	1647.1	25.2	1744.03	15.9667
																																						2662.4	12.8	993.2	2.8	1131.35	27.2077	1989.7	11.79	1234.4	16.2	1747.95	67.2639
																																						2664.4	10.2	407.8	6	1196.7	5.82259	1821.5	25.13	1105.2	31.5	1748.51	63.2052
																																						2665.8	10.8	419	4.1	1257.21	6.50604	1942.2	16.76	936.9	26.8	1751.62	20.0793
																																						2667.6	13.8	437.1	4.2	1278.3	4.81005	1988.7	17.93	1950.3	34	1755.03	70.3758
																																						2667.8	11.3	439.8	7.7	1300.46	6.81107	1928.5	15.99	948.9	29.2	1755.3	69.3523
																																						2669.7	11.4	440.8	4.3	1299.35	5.96763	1966.7	9.76	554	14	1756.14	47.5811
																																						2671.3	11.9	444.5	12.7	1318.49	15.7714	1872.7	21.65	1096.3	43.1	1759.24	42.1515
																																						2681.6	9.7	445.3	6.2	1351.5	16.7088	1924.9	13.29	1549.1	15	1761.82	73.5408
																																						2683.4	11.3	445.9	4.3	1376.37	7.98773	1845.6	12.7	380.5	10.4	1765.81	57.0542
																																						2688.7	9.8	447.4	9.2	1372.34	9.87954	1934	21.55	2912.2	27.4	1766.06	64.0151
																																						2689.2	11	458.9	7.8	1386.19	10.1696	1957.9	22.69	2070	23.4	1769.47	37.2804
																																						2691.7	14.2	460.4	4.4	1400.68	12.6997	1949	15.41	1993.8	18	1770.44	20.2781
																																						2702.7	11.2	466.3	9.1	1439.71	4.91694	1964.3	16.65	1679.7	23.9	1772.13	73.9876
																																						2707.5	13.1	469.3	9.2	1432.92	9.22881	1922.9	14.96	1568.2	26.9	1782.59	24.9214
																																						2708.1	10.9	469.6	4.5	1437.23	6.75718	1990.1	28.35	1703.7	43	1784.53	14.2417
																																						2715	7.6	482.1	4.6	1436.64	6.75682	1987.8	14.36	379.8	10.9	1786.15	13.8399
																																						2726.1	10.9	485.1	4.7	1459.97	7.93032	1923.5	40.58	1983.7	24.5	1789.32	13.8708
																																						2742	12.2	498.2	4.8	1460.07	7.92782	1942.9	15.6	1645.3	23.9	1795.49	27.4267
																																						2747.8	12.5	553.4	6	1476.91	6.93182	2211.9	13.94	1885	15.7	1796.62	39.247
																																						2770.6	12.1	645.8	6.5	1497.82	5.87544	1933.5	17.24	1286.9	28.5	1810.01	20.6014
																																						3169.3	10.1	793.2	7.5	1552.27	7.45735	2181.7	21.51	1121.9	27.2	1818.8	13.6308
																																						977	16.3	903.1	89.6	1552.93	9.6741	1947	13.46	1817.8	22.1	1821.82	18.5857
																																						989.1	19.7	915	23.7	1557.49	6.09302	1916.7	30.26	1187.8	19.3	1828.09	26.3635
																																						996.1	20.5	918.8	37.6	1576.18	6.79717	2353.1	15.79	1438.7	16.5	1831.68	12.9959
																																						996.5	18.9	925	56.7	1667.29	6.77845	2053.8	35.43	1193.1	23.1	1841.14	24.8379
																																						999.4	18.4	935.7	26.3	1676.12	13.339	2336	19.82	1373.2	29.1	1844.33	48.694
																																						1001.6	13.5	951.5	28.4	1689.55	8.62024	2460.6	18.06	440.4	12.1	1845.21	14.6442
																																						1002.9	15.8	965.1	37.4	1806.63	6.1209	2604.6	14.91	1807.4	34.1	1860.36	48.7062
																																						1004.6	15.8	1003.7	89	2351.87	36.4112	2576.5	15.34	1077.9	32.3	1877.96	13.2164
																																						1005.9	14.2	1003.9	79.3	2436.26	7.07484	2700.4	12.26	1488.7	28.2	1893.17	126.016
																																						1013	14.9	1007.5	56.4	2574.13	10.2551	2558.7	31.22	1766	34.6	1911.44	19.7946
																																						1017.2	12.4	1011.9	31.6	401.342	5.67308	2765.6	18.79	1593.2	24.9	1916.4	27.4096
																																						1018.4	12.1	1012.6	34.9	406.387	5.10897	2671.8	17.04	562.7	17.8	1925.56	84.8487
																																						1019.3	18.7	1013.3	42.4	407	4.54604	2679.1	11.43	1057	33	1929.48	12.6432
																																						1025.5	16.2	1016.5	35.3	407.825	5.31117	2779.4	9.43	1685.2	25.4	1967.12	17.8301
																																						1027.8	16.8	1018.9	36.5	410.183	5.80896	2710.5	24.16	1125.1	29	2057.8	26.2679
																																						1028	12.7	1024.5	66.2	413	5.14279	2629.1	11.36	410.6	10.9	2071.23	63.5662
																																						1029.9	16.5	1028.5	45.7	414.041	4.88401	2850.3	6.86	1734	16.5	2086.21	13.0321
																																						1029.9	12.7	1029.7	22.8	416.648	3.99147	3075.3	8.65	1993.9	15.6	2092.79	9.73984
																																						1030.1	14.3	1034.7	40.2	421.311	6.70185	3287.7	7.99	1418	29.9	2123.89	56.6464
																																						1031	13.3	1036.8	63.1	423.649	5.07121	3094.4	25.19	2812.2	22.6	2132.41	11.2123
																																						1032.9	18.3	1038	55.1	424.862	4.36474	3421.2	12.01	1431.3	18.8	2144.21	12.5822
																																						1034.8	14.7	1048.1	76.8	425.247	5.17055	361.6	3.44	468.1	12.1	2589.04	10.8079
																																						1035.6	19.7	1050.8	54.5	431.878	5.12115	365.5	3.57	1302.9	15.9	2630.28	11.3216
																																						1036.6	17.1	1051.7	52.6	429.39	3.77458	369.1	3.79	1303.6	27.6	2679.78	5.49811
																																						1043.5	15.9	1053.3	39.3	440.785	4.94297	372.9	4.39	570.7	20.6	2686.42	17.8243
																																						1044.6	15.9	1054.9	33.3	443.444	5.02555	427.5	6.24	1143	29.3	2745.42	8.76094
																																						1045	18.8	1056.3	44.5	499.925	5.57186	485.6	7.5	1062.8	35.3	2763.8	5.11409
																																						1048.9	16.2	1057.2	52.6	571.672	6.7102	557.4	23.16	1639.3	21	2876.63	17.8624
																																						1049	11.9	1068.8	31.2	578.738	6.18838	1013.4	26.18	1059	30.6	493.422	5.22549
																																						1050.3	18.7	1076.3	99.2	582.533	6.92921	1139.8	30.8	929.3	27.4	1067.34	52.2514
																																						1050.3	18.9	1077.5	95.4	597.597	7.19932	1072.5	32.72	2048.7	17	1096.16	21.5063
																																						1050.5	12	1083.1	32.1	830.323	8.22942	1065.6	56.37	1694.3	15.5	1112.8	34.5042
																																						1054.3	24.6	1086.1	60.8	869.651	9.45418	1146.9	45.88	618	16.2	1114.12	71.0824
																																						1055.5	16.5	1093.2	37.7	893.384	8.75741	1157.3	19.02	1989.5	9.8	1147.42	20.038
																																						1055.8	18.9	1096.1	50.4	923.128	13.4705	1173.9	27.32	1008.2	35.8	1150.5	34.6127
																																						1056	18.1	1097.2	53.3	928.51	10.3136	1045	43.38	466.6	14.9	1177.24	39.9699
																																						1056.6	18.8	1132.4	32.5	938.094	9.50836	1161.3	56.17	1101.4	27.1	1177.71	49.3895
																																						1057.9	14.9	1133.6	44.9	934.577	10.0494	1083.1	51.03	428.4	11.4	1186.52	20.0822
																																						1060.5	18.2	1155.4	60.5	941.85	10.111	1220.8	91.83	468.6	14.3	1222.89	57.3943
																																						1061	15.8	1159.7	40.9	956.115	8.07554	1280.4	45.15	1013.5	51.1	1233.72	19.9732
																																						1063.4	16	1172.6	66.8	956.707	8.01663	1098.8	37.51	1421.4	25.8	1270.38	66.3902
																																						1063.5	14.5	1178.3	62.7	954.191	8.38892	1111.6	39.78	2737	8.8	1293.95	45.5772
																																						1065.1	12.7	1183.2	19.8	971.342	11.0027	1189.6	49.22	1011.3	35.6	1307.62	23.4949
																																						1068	14.6	1183.6	40.3	961.789	11.1382	1263	45.01	638.7	18.1	1316.19	46.681
																																						1070.7	14.8	1190	47.4	968.463	10.8292	1466.3	21.79	1986.3	17.2	1317.78	44.9833
																																						1077.1	15.7	1198	33.3	969.858	10.7122	1261.2	35.77	895.5	27.5	1338.31	20.239
																																						1077.1	14.7	1204.4	29.4	979.738	10.1865	1167.4	42.46	1688.4	32.9	1338.75	28.6397
																																						1078.2	16.6	1205.4	27.6	981.024	10.3625	1196.8	97.54	1561.7	17.3	1342.37	41.9978
																																						1078.4	16.7	1206.3	50.5	975.831	11.67	1615.5	303.51	900.8	26.2	1342.74	34.4306
																																						1081.2	15	1212.1	57.1	990.587	11.0878	1405.6	45.54	2001.1	19.3	1350.99	37.3262
																																						1090.2	14.5	1214.4	19.7	985.181	7.81488	1289.2	47.25	1101.9	28.6	1361.12	27.0036
																																						1093.7	14	1215.1	29.1	996.299	11.7814	1087.3	77.8	1112.8	35.3	1363.81	21.8116
																																						1096.5	17.3	1225.6	44.8	993.35	10.2052	1383.4	32.33	1716.2	37.4	1368.3	40.9155
																																						1100.1	14.9	1252.4	32.1	1010.73	12.5625	1078.8	60.91	1148.2	56.1	1376.92	23.7499
																																						1104.1	16	1274.3	82.9	1008.67	8.11099	1395.4	48.7	1489.9	24.1	1377.14	19.4564
																																						1107.8	16	1276.9	32.6	1018.13	8.53723	1494.5	34.33	1917.1	16.2	1382.32	35.7048
																																						1121.3	19	1283.2	55.8	1027.89	9.96159	1425.7	73.82	449.5	30	1392.99	66.237
																																						1123.3	15.3	1309.3	53.4	1070.32	8.79267	1552.7	27.4	1847.4	15.3	1400.58	40.4171
																																						1137.6	19.4	1331.2	31.7	1075.43	9.2932	1546.8	48.08	1724.9	18.2	1401.86	36.7677
																																						1138.2	14.6	1339.3	24.9	1083.35	10.5559	1381.5	21.19	1127.7	38.7	1407.14	127.938
																																						1144.5	17	1341.6	37.3	1153.01	12.9544	1445.3	31.56	1372	23.4	1407.26	43.0296
																																						1146.2	15.8	1349.8	19.3	1154.1	13.8342	1501.5	21.36	1721.5	19.8	1413.16	23.3659
																																						1148.4	17.2	1361.7	80.2	1188	8.32333	1509.6	22.72	1976.7	18.9	1419.28	41.6076
																																						1149.3	12.6	1428.3	43.8	1229.65	11.2678	1455.5	35.82	1609.3	16.9	1420.72	32.0569
																																						1153.8	19.3	1440.2	26.3	1273.65	9.66412	1600.2	28.44	2002.3	14.8	1421.56	22.3145
																																						1154.5	17.4	1477.7	128.3	1276.7	12.5138	1541.9	32.5	1750.9	16.1	1422.6	22.0114
																																						1154.8	12.9	1486	33.9	1287.81	10.7682	1548.7	30.63	471.6	14.1	1424.06	47.8592
																																						1158.9	16.7	1501.1	48.2	1393.24	9.2602	1499	27.85	1853.9	21.9	1424.95	23.7446
																																						1161.7	14.7	1548.9	25.2	1453.41	11.7749	1392.7	175.9	1197.5	18.2	1427.25	25.9978
																																						1167.3	26.5	1623.7	50.6	1483.06	16.6501	1888.3	17.43	1988.7	11.7	1428.76	19.1941
																																						1168.4	16.9	1630.5	54.9	1578.08	10.1167	1635.4	27.88	1646.5	13.8	1432.9	19.191
																																						1171.9	11	1640.2	28.4	1638.84	10.6181	1771.1	22.63	1637.4	27	1435.59	21.5742
																																						1182.4	14.5	1647.7	34.3	1646.29	12.4051	1967.1	23.07	654.3	16.7	1440.78	62.4533
																																						1188.2	21.1	1648.7	61	1729.06	11.222	1886.6	19.08	1963.7	19.4	1444.38	35.6159
																																						1207.6	26.9	1675.6	81.5	1726.75	12.4618	1976	29.78	1085.4	31.6	1444.78	30.4746
																																						1210.4	17.6	390.2	9.6	1735.09	11.0734	1363	150.09	1240	21.1	1452.81	44.9762
																																						1212.6	13.1	400.9	6.3	1735.55	10.9696	1850	36.11	2020.8	23.1	1469.73	96.2789
																																						1224.3	14.3	434.7	9.2	416.113	3.38055	1895.5	16.09	1993.7	14.2	1602.95	20.0776
																																						1232.9	16.4	442.1	10.6	421.81	3.04612	1933.3	41.67	1941.5	15	1627.8	61.3468
																																						1251.8	14	446.7	4.4	423.557	3.21609	1876	24.76	1806.3	13.8	1628.25	54.9054
																																						1305.8	15.1	449.2	6.2	423.649	4.09563	1820.8	53.97	1396.5	22	1632.37	25.8521
																																						1322.4	17.7	450.7	5.9	424.211	5.02449	1861.6	19.86	1676.6	40.3	1635.46	32.5549
																																						1330	18.2	454.8	4.6	424.826	4.97034	1972.7	22.37	1514.5	17	1651.63	39.7578
																																						1331.4	17.7	456.3	4.5	425.044	5.28803	1864.2	33.11	466.7	21.7	1654.09	37.13
																																						1367.2	14.3	468.2	6.5	425.792	3.16924	1913.7	30.75	1091.7	32.4	1674.24	19.6508
																																						1383.9	12.9	494.5	9.7	426.527	3.17277	1953	24.42	1118.3	29.6	1676.3	20.6882
																																						1399.6	17.7	503.5	4.8	427.943	4.37376	1926	43	1741	16.5	1678.37	18.6196
																																						1400.5	12.9	505.2	4.9	427.643	3.68279	1945.6	35.47	1470.5	22.8	1684.95	18.6668
																																						1403	13	531.2	5.1	427.953	2.50297	1910.4	28.37	1131.5	18.9	1686.02	31.8595
																																						1404.2	20	547.9	6	429.309	3.18014	2046.5	30.66	498.3	22	1686.11	21.5056
																																						1409	11	551	5.3	430.359	3.24679	1998.5	30.7	1643.9	18	1695.12	18.6252
																																						1439.9	13.6	576.9	11.6	429.438	5.2665	1951.5	28.7	1702.5	13.7	1698.33	20.1173
																																						1442	10.4	601.6	12.6	429.676	4.29584	1968.8	32.21	1040.2	24.5	1698.49	23.4431
																																						1491.7	15.8	609.3	9.5	430.155	2.84266	2013.5	36.41	2669.1	16.5	1703.86	18.4697
																																						1586.3	13.6	633.3	7.7	431.64	3.32981	2171.4	28.13	1855.1	16.8	1707.54	39.8906
																																						2541.3	13.4	701	7.7	432.517	4.77007	2233	25.29	1706.7	14.9	1712.42	18.5104
																																						2592.7	13	739.1	37	432.746	4.60608	2611.4	21.34	1323.2	23.5	1717.07	18.4902
																																						2629.3	13	774.1	7.3	432.447	4.00856	2860.2	69.68	1689.9	19.8	1720.27	18.5095
																																						2634.3	10.2	829.7	63.9	432.955	3.95877	2707.8	49.83	1330.4	36.1	1721.17	18.5042
																																						2639.7	10	906.6	20.7	434.54	5.39826	3121.7	13.36	1621.5	19.2	1723.71	22.6763
																																						2647.3	11.1	938.6	28.2	433.494	3.68362	3137.9	54.82	1012	17	1737.89	18.9005
																																						2658.6	11.4	991.5	37.8	434.501	4.77834	3356.6	13.6	1610.7	19.4	1748.24	18.3374
																																						2668.7	11.6	994	20.3	436.215	5.88972	367.6	16.21	980.4	28	1751.5	29.2182
																																						2669	11.4	1000.1	38.4	435.027	5.63338	375	11.75	1896.1	18.5	1756.51	68.3293
																																						2680.4	10.8	1006.7	39.8	436.409	4.54194	375.3	28.99	1847.6	15.8	1764.41	20.5927
																																						2681.9	11.1	1017.7	32.8	435.645	3.22214	380.8	47.57	1655.5	19.5	1766.86	25.3962
																																						2697.2	11.1	1022.7	53.9	436.895	5.31894	393.2	59.76	403.9	10.3	1791.29	21.4575
																																						2751.1	10.5	1026.8	49.8	435.797	3.765	413.3	39.84	939.7	26.9	1793.75	18.3058
																																						2815.3	13.3	1028	20.2	436.232	4.22155	418.6	67.76	1803.1	26.2	1809.6	33.0517
																																								1029.8	20.4	437.711	4.03145	420.5	41.22	2849.4	20.2	1813.05	18.3218
																																								1031	43.5	437.972	6.45146	421.3	24.01	1510.1	17.4	1837.38	18.1566
																																								1036.3	67.7	438.297	4.53251	422.2	44.63	1261	12.6	1859.53	38.6245
																																								1037.4	28.7	438.583	4.08603	426.8	10.21	1193.7	51.8	1864.96	18.1338
																																								1044.8	27.4	439.561	4.08446	433.8	48.89	1004.8	34.7	1907.55	18.0608
																																								1048.8	62.8	440.733	3.74241	433.8	22.64	1163.8	25.7	2085.66	17.6329
																																								1058	47.9	441.35	4.8918	436.8	23.59	962.3	24.6	2323.87	46.8029
																																								1058.5	56	441.181	4.27343	438.3	15.13	1990.3	15.7	2595.83	16.6834
																																								1069.1	28.7	440.803	5.17579	446.3	31.19	1995.9	12.3	2742.5	17.1648
																																								1074.2	20.1	442.402	3.88395	453.8	20.76	1430.3	29.4
																																								1090.4	60	444.471	5.88604	475.9	29.64	2561.3	11
																																								1105.7	90	443.581	4.42007	508.9	38.31	1098.6	55.2
																																								1116.1	64.3	446.319	3.59673	519.3	31.57	423	11.3
																																								1117.9	94.2	445.908	4.20262	562.2	28.91	1938.2	18
																																								1122.1	33.3	449.698	3.97691	854.6	38.11	1440.6	21.1
																																								1125.2	30.5	453.938	3.07292	892.3	57.84	1939.9	12.3
																																								1128.4	39.7	455.802	3.51908	988.8	223.12	1944.2	16.3
																																								1133.1	35.5	515.678	4.69301	1105	119.79	383.5	13.3
																																								1141.7	62.1	531.308	7.22676	978.5	180.01	2714.2	22.7
																																								1155.1	30.6	548.792	5.18047	1041.2	123.15	1971.4	11.6
																																								1159.3	23.7	596.602	4.0569	1135.7	240.69	1615.9	21.7
																																								1164.8	19.8	600.687	4.32964	922.8	305.22	465.3	71.2
																																								1174.4	31.3	603.784	4.67351	1143.7	80.81	914.3	14.5
																																								1179	45.3	619.712	6.01531	1468.7	109.18	1352.7	15.3
																																								1181.1	31.9	621.777	4.82813	1236.9	143.88	1600.2	36.2
																																								1181.9	33.8	700.275	10.2723	1273.6	124.49	1735.3	22.1
																																								1186.6	51.2	820.618	24.158	1798.4	227.91	1941	31.3
																																								1200.6	33.6	884.038	7.2019	1713.6	171.14	999.5	23.9
																																								1217.3	38.6	899.396	6.84702	1671	76.61	1946.9	17.3
																																								1217.5	27.1	932.072	8.16691	2090.1	91.18	1764	13
																																								1218.8	38.4	925.392	13.9804	1715	227.17	1593	24.4
																																								1225.8	19.6	929.864	7.80865	1698.9	116.44	1643.7	14.9
																																								1228.1	122.7	945.777	21.1732	1700.5	110.9	894.6	13.7
																																								1237.7	30.3	946.127	9.14378	1753.3	106.68	1991.2	21.8
																																								1244.8	20.6	945.627	13.7301	1945.8	89.84	374.1	9.4
																																								1249.5	26.8	951.048	11.6906	1861.9	115.16	424.9	11.4
																																								1271.5	38.1	952.796	6.4175	1838.5	98.68	995	20.7
																																								1281.5	23.8	957.154	11.3179	1990.7	67.93	942.7	22.8
																																								1300.4	46.7	958.734	10.0712	1870.3	132.35	986.2	29.1
																																								1324.4	37.2	961.503	10.3355	1751.7	132.86	1225.8	17.8
																																								1333.4	19.4	970.541	16.2261	2301.5	69.03	1072.3	36
																																								1338.4	22.2	978.483	12.2113	2256.4	57.55	1259.9	50.5
																																								1369	35.8	978.788	6.96254	2462	62.07	1066.6	24.8
																																								1369.5	19.3	980.411	8.53277	2569	75.81	1024.1	31.3
																																								1373.4	19.2	980.761	6.22468	3083.4	187.92	1155.9	29.4
																																								1457.1	22.1	992.369	7.81184	382.1	3.07	1070.6	24.1
																																								1458.7	39.2	990.217	7.29626	393.6	15.5	1063.5	23.8
																																								1475.5	19	997.678	7.5706	406	23.38	1152.2	28.4
																																								1475.8	26	998.428	7.26054	410.8	6.25	1050.5	32.6
																																								1475.9	30.4	999.583	9.04426	413.9	4.3	1117.3	33.2
																																								1478.7	19	1001.58	7.80342	414.1	8.97	1338.9	25
																																								1508.5	110.5	1000.84	9.02276	415.7	4.75	1047.3	35.5
																																								1520.3	26.6	998.457	15.3933	416.3	4.56	1082.9	29.5
																																								1521.9	18.9	1005.79	7.94094	416.6	6.72	1217.9	31.3
																																								1528.3	18.8	1008.53	5.93805	416.7	6.32	1078.5	32.8
																																								1538.6	45.3	1015.47	9.74219	425.3	26.36	1109.2	19.5
																																								1554.9	27	1017.99	9.40839	428.7	45.26	1095.8	15
																																								1597.2	25.3	1028.38	10.6364	441.4	13.56	1177.7	32.3
																																								1683.3	23.1	1029.4	8.1523	469.6	32.74	1146.6	23
																																								1860	25.6	1027.78	11.4259	496.4	35.7	1228.9	28.8
																																								1905.2	31.6	1032.31	9.16908	501.5	20.65	1143.3	44.2
																																								1930.4	27.2	1023.82	15.0524	858.7	11.75	1202.7	23.2
																																								2023.4	17.7	1030.33	9.35141	1034.1	43.43	1179.2	32.3
																																								2749.8	16.4	1037.45	8.2498	948.4	190.64	1184	31.8
																																								385.3	10.2	1033.46	12.5918	1297.6	210.07	1247.8	34.7
																																								391	5.7	1036.39	8.18333	1073.9	88.75	1176.8	18.7
																																								399.7	4.6	1042.41	5.5475	1126.4	131.89	1321.5	32.9
																																								416.9	4	1044.57	8.57467	930	94.75	1253.6	22.8
																																								425.7	4.1	1054.94	8.34913	1242	87.48	1205.4	29.1
																																								436.4	11.5	1052.88	12.8905	1222.4	102.24	1382.7	28
																																								440.3	9.5	1091.05	17.1093	1193.7	52.36	1509.3	22.3
																																								447.3	10.8	1224.58	7.09369	1110.4	159.14	1457.5	46.5
																																								452	4.4	1260.06	9.34921	1109.8	96.72	1398	36.3
																																								455.6	8.6	1276.45	9.74363	1338.8	136.94	1330.9	23.9
																																								462.6	7.2	1334.82	10.5666	1215	392.13	1347.2	29.5
																																								468.1	5.4	1374.38	10.7121	1280.6	39.99	1305.1	24.3
																																								491	5.2	1414.29	8.77828	1262.1	232.62	1359.6	22.3
																																								582.4	12.4	1454.38	10.819	1171	292.57	1391.3	29.7
																																								582.8	5.6	1488.3	7.33531	1456.4	78.96	1324.6	27.8
																																								707.7	6.7	1532.04	10.4475	1498.2	81.68	1372	20.3
																																								953.7	91.3	1554.3	8.84753	1481.6	34.52	1415.4	20.1
																																								986	46.6	1576.67	10.7333	1681.5	122.79	1428.4	20.8
																																								995.4	38.7	1580.49	11.63	1541	163.42	1597.2	27
																																								996.2	39	1634.71	10.5873	1635.2	153.26	1389.2	25.2
																																								999.8	53.4	1748.52	8.47797	1469.5	148.01	1478.9	17.4
																																								1010.4	68.4	1764.39	7.81774	1436.9	85.16	1507.5	18.8
																																								1028.8	52.2	1789.47	13.3202	1585.8	74.7	1381.3	30.2
																																								1030.3	32.2	1831.49	7.95412	1770.5	99.27	1461	30.5
																																								1032.2	52	2039.3	19.5794	1594.9	20.22	1495.7	31.1
																																								1034.7	46.2	2060.49	10.3339	1763.7	123.44	1530	30.5
																																								1045.2	32.9	2204.2	73.7476	1643.9	38.97	1495.2	21
																																								1049.8	32.7	2446.84	11.5539	1944.7	161.57	1529.8	28.2
																																								1058.3	28.6	2494.62	26.3756	1637.5	81.81	1694.4	25.6
																																								1064.5	66.4	2600.32	10.9432	1386.2	231.69	1711.4	20.4
																																								1070.3	96.4	414.51	4.72276	1778.2	14.87	1608.9	20.1
																																								1071.1	47.8	417.429	3.47154	1808.2	82.12	1609.4	19.7
																																								1072.9	34	417.437	12.2852	1765.9	40.3	1634.6	30.5
																																								1111.3	21.6	418.445	3.41514	1444	264.97	1616.7	34.4
																																								1139.2	28.5	419.825	3.18544	1682.7	104.54	1676.3	20.9
																																								1142.3	111.9	420.495	4.35606	1728	111.16	1669.7	18.4
																																								1143.7	45.7	419.569	3.38777	1784.5	156.05	1686.3	19.3
																																								1145	32.4	420.469	2.42789	1863.1	99.01	1610	28.9
																																								1150.3	20.7	420.216	3.37071	1790.9	80.12	1692.7	22.7
																																								1154.3	33.9	419.668	3.86276	1897.5	151.56	1695.9	20.1
																																								1168.1	64	421.951	3.54155	1649.7	82.16	1678.3	18.2
																																								1168.4	55.1	420.053	3.25513	1945.6	19.04	2035.4	27.2
																																								1176.3	45.1	421.417	4.0042	1932.3	35.08	1699.7	30.4
																																								1178.2	57	421.453	3.21283	1564.2	212.16	1733.1	31
																																								1178.7	96.6	422.945	3.34397	1972.4	190	1764.2	30
																																								1179.3	82.3	423.915	2.89687	1864.2	94.88	1763	23
																																								1193.5	39.3	421.993	3.26491	2699.4	140.95	1718.9	25.2
																																								1197	68.7	422.571	3.52136	2888.2	176.43	1666.4	25.8
																																								1198.1	84.4	423.806	2.56445	2568.3	36.64	1806.9	18.6
																																								1217.2	29.5	423.656	3.11088	2807.6	105.44	1742.1	32.1
																																								1221	58.2	424.488	3.37846	2797.9	86.6	1789.4	31.4
																																								1245.1	22.3	423.501	2.79075	2633.5	30.16	1631.3	27.7
																																								1246.3	32.5	423.543	3.8992	2692.7	15.03	1861.7	29.8
																																								1249.6	58.2	425.373	9.17873	2939.1	109.1	1746	15.5
																																								1267.4	74	423.884	3.24435	2696.1	76.19	1724.7	26.7
																																								1281.8	72.9	426.335	3.12734	2806.6	124.21	1840.3	30.2
																																								1288.7	47.3	426.09	4.21565	2921	80.39	1877.5	18.3
																																								1298	74.9	426.165	4.21233			1976.3	16.8
																																								1337.4	19.7	426.265	4.23201			2052.8	16.8
																																								1341.8	35.7	427.4	3.23167			1955.2	26.3
																																								1347.4	69.9	426.691	5.34653			1901.3	18.1
																																								1347.4	30.5	426.03	3.29433			2025.6	20.1
																																								1354.8	64.3	427.026	3.09383			2013.9	16.2
																																								1375.6	21.7	427.325	2.44027			1995.9	29.2
																																								1375.9	52.7	428.425	3.32009			2001.6	17.6
																																								1377.4	27.7	428.448	3.76955			2108.3	17.3
																																								1390.7	45.5	429.366	6.93908			2540.8	25.6
																																								1401.8	33.3	428.521	5.17858			2745.7	18.4
																																								1422.3	42.4	429.316	3.60398			2747.2	11.2
																																								1428.6	75.1	429.055	3.03317			2749.2	17.9
																																								1442.7	38.3	428.85	4.25061			2734.8	16.4
																																								1467.9	31.6	429.914	3.9971			2939.6	20.6
																																								1479.4	63.3	429.855	3.04014			2836.9	22.1
																																								1479.6	33.2	429.878	4.2329			396.7	4.5
																																								1479.8	46.3	430.654	2.88652			410.7	8.6
																																								1490	24.4	430.858	3.43659			420.9	8.6
																																								1493.6	55.6	431.553	5.16694			427.7	9.1
																																								1496.8	55.3	430.123	3.84706			432.6	8.7
																																								1500.9	57.1	431.532	3.45012			440.8	3.7
																																								1502.3	57.5	432.046	3.40158			448.1	13.8
																																								1507	44.8	432.522	4.64142			453.4	7.3
																																								1543.4	18.8	433.001	4.41459			455.4	5.3
																																								1574.2	36.7	432.782	3.35876			481.7	14.7
																																								1612.5	24.8	433.063	3.30811			578.5	12.7
																																								1620.7	39.5	435.134	3.74995			617.3	9.8
																																								1643.9	39.3	434.119	4.26167			873	10.9
																																								1648.9	30.6	434.535	4.1827			877.1	12.4
																																								1652.2	65	435.397	3.38071			895.7	18.7
																																								1697.8	31.1	435.995	4.74963			899.6	12.5
																																								1744.1	40	435.306	3.21938			1023.3	24.3
																																								1774.9	18.3	435.122	3.98349			984.8	13.9
																																								1828.8	30.8	434.988	3.68845			976.8	22
																																								1897	29	435.04	2.75892			1030.8	20.8
																																								1954.2	36.8	436.463	3.21483			1058.4	23.8
																																								2101.4	36.2	437.655	3.32367			1070	15.7
																																								2112.7	29.6	438.307	3.04897			1051.6	26
																																								2627.9	48.9	437.114	4.82159			1050.8	15.6
																																								2696.3	19	438.114	4.09712			1077.5	18
																																								2773.5	18.4	438.597	4.65374			1090	21.9
																																								932.7	70.3	438.642	2.83453			1073	20.4
																																								952.3	34.2	438.465	3.67468			1111	19.5
																																								971.8	58.8	438.279	3.97546			1054.6	19.6
																																								979.2	29.4	439.382	3.86812			1135.4	18.2
																																								979.9	29.2	441.177	3.27894			1137	15.3
																																								980.7	34.8	441.581	3.08321			1177.6	18.9
																																								982.2	72.6	439.772	3.66783			1079.1	11.9
																																								988.8	25.3	440.298	4.19469			1129.8	12.9
																																								999.6	50.6	443.526	3.99327			1401.1	13.7
																																								1004.1	20.3	442.7	3.37103			1128.5	23
																																								1007.1	34.5	443.158	3.43488			1144.1	14.1
																																								1017	20.3	443.375	3.57349			1209	18.9
																																								1017.4	23.5	444.557	3.44795			1251.4	18.9
																																								1019	33.2	441.498	11.4382			1254.3	18.8
																																								1023.5	20.2	448.723	3.997			1354	13.5
																																								1024.8	20.5	450.616	3.33008			1241.5	10.3
																																								1025.7	61	451.45	3.1565			1421.8	18.2
																																								1033.1	26.7	451.65	4.00955			1273	10.9
																																								1037.7	47.9	451.773	5.08369			1347.6	12.6
																																								1044.4	20.2	458.96	16.7346			1397.1	17.5
																																								1045.2	33.9	453.795	4.7027			1326.8	11.5
																																								1046.5	32.7	453.641	3.76797			1366.9	12.2
																																								1050.7	28	454.562	4.04021			1389.7	16.5
																																								1051	47.4	460.682	4.91604			1362.9	21.1
																																								1055.2	52.4	460.859	3.23254			1468.9	13
																																								1060.5	31.6	464.04	9.47851			1467.1	19.7
																																								1063.7	94.2	468.077	3.90502			1492.5	13
																																								1064	24	468.373	3.36658			1485.8	10
																																								1064.4	84.2	486.335	6.49159			1441.1	12.4
																																								1071.6	86.5	516.716	3.89265			1454.8	18
																																								1072.4	25.5	762.572	29.7248			1727.8	17.7
																																								1074.4	31	1008.16	6.87218			1647.6	11.8
																																								1080.3	34.9	1034.77	6.6204			1556.7	15.7
																																								1081.4	44	1055.89	7.4184			1544.9	16.3
																																								1088.4	44.5	1246.75	7.35201			1709.6	18.5
																																								1091.9	33.5	1270.73	9.74994			1634.1	12.9
																																								1092.8	46.1	393.821	6.37514			1650.2	17
																																								1094.7	70	408.43	6.36577			1648.5	19.7
																																								1095.1	48.5	422.116	4.41527			1703.4	11
																																								1099.4	68.7	428.689	5.48896			1787.5	15.7
																																								1110.9	62.3	430.373	3.85706			1641.9	17.4
																																								1113.1	26.6	430.456	4.2496			1702.4	12.3
																																								1123.7	62.7	433.302	8.59097			1633.8	10.5
																																								1125.4	56.1	432.132	9.13427			1696	18.8
																																								1128	39.1	434.931	3.66428			1619.8	11.1
																																								1130.8	21.3	436.013	7.87489			1634.2	19.2
																																								1135.4	21.1	440.29	5.58087			1772.9	16.7
																																								1136.2	36.8	437.652	5.75905			1698.9	16.3
																																								1139.3	19.9	438.519	7.83463			1703.4	16.7
																																								1139.7	66.5	439.858	6.69708			1780.4	15.7
																																								1144.9	28	442.783	6.60905			1993.7	14.9
																																								1146.1	64	439.362	4.86371			1926.8	18.5
																																								1146.9	41.5	443.726	8.17809			1861.6	16.2
																																								1152.3	39.1	440.318	5.03349			1838.6	17.1
																																								1158.5	30.5	439.565	8.10283			1846.2	10.9
																																								1158.9	22.8	443.361	4.09032			1846	41.1
																																								1161	35.9	445.542	8.64673			1900.8	10.4
																																								1165.3	27.1	445.9	4.53961			1959.2	10.4
																																								1165.6	41.9	447.815	5.40095			1936.5	19.7
																																								1168.5	23.4	445.401	4.45707			1911.1	16.4
																																								1174.8	29.9	448.491	4.42687			1925.7	16
																																								1176.6	19.8	447.524	7.01515			2088.3	17.2
																																								1177.9	59.2	450.919	4.38223			1904.6	15.1
																																								1186.2	25.3	454.692	6.52691			1988	18.7
																																								1194.2	19.7	455.534	4.85839			2170.1	14.7
																																								1201.1	51.9	453.02	7.45888			2003.4	18
																																								1205	19.7	460.764	7.4111			2024.5	9.8
																																								1206.6	56.8	456.464	6.52671			2004	18.1
																																								1212.1	29.1	466.002	13.2559			2240.6	14
																																								1227.6	84.9	472.541	5.22785			2648.7	16.3
																																								1235	24.5	476.243	7.86365			2593.3	14.4
																																								1248.4	26.6	490.299	4.2081			2605.9	14.9
																																								1293.8	45.5	509.403	4.82853			2770.3	18
																																								1295.9	43	520.178	8.36145			2654	14.9
																																								1315.6	19.4	522.191	4.46426			2664.9	15.6
																																								1335.7	37	527.807	4.28555			2743	13.5
																																								1337.9	51.3	572.305	8.56194			2895.2	14.4
																																								1410.2	61.3	595.979	4.19168			2841.7	16.5
																																								1416.1	43.3	606.124	18.7502			3006.3	14.3
																																								1422.9	35.5	604.129	12.2014			401.3	3.8
																																								1428.8	27.7	608.123	10.7437			422.8	3.5
																																								1440.2	19.1	612.616	9.66794			433	3.1
																																								1440.5	23.3	612.657	18.2428			440.2	6.6
																																								1446.7	19	614.799	9.9973			442.3	6.1
																																								1454.3	39	623.049	9.85287			450.7	4.2
																																								1471.9	19	624.736	16.3982			452.3	4.4
																																								1474	40.6	676.215	4.30588			461.1	3.7
																																								1476.3	23.3	745.99	10.2045			540.9	6.4
																																								1500.2	31.8	979.377	12.2883			600.8	4.5
																																								1505.9	18.9	981.07	20.5238			655.3	6.5
																																								1516.8	43.8	986.302	13.756			658.6	6
																																								1531.8	18.9	990.567	14.866			676.5	9.7
																																								1556.5	31.4	990.239	8.8342			692.5	12.4
																																								1624.4	21	1038.9	11.9442			858	8.7
																																								1649.4	24.7	1081.53	8.31949			979.7	23.1
																																								2734.6	16.5	1097.66	18.5442			961.5	23.9
																																								967.1	68.4	1123.33	12.4567			1028.3	21.9
																																								1001.8	34.9	1133.38	27.338			971	21.4
																																								1004.3	22.9	1131.01	10.5204			958	23.3
																																								1011.2	20.7	1136.94	11.6155			1092.5	18.4
																																								1025.1	20.2	1144.29	23.7188			1057.8	14.7
																																								1030.8	21.4	1164.47	12.2139			974.1	13.2
																																								1032.4	31.6	1159.63	31.4092			1017.5	17.1
																																								1034.8	22.4	1184.07	10.6666			1002.5	20.8
																																								1039.4	38.4	1189.01	6.81211			1045	18.5
																																								1041.7	66.4	1191.69	11.7081			1031.6	23.2
																																								1059.6	35.6	1205.84	9.74677			990.5	18.1
																																								1060.4	57.2	1227.73	9.43205			1032.6	24.3
																																								1061.5	34.6	1232.79	14.2073			1070.5	18.8
																																								1069.7	31.6	1241.43	7.38772			1087.4	13.9
																																								1072.8	34	1258.56	30.5443			1077	23.3
																																								1074.3	48.6	1271.99	13.6584			1075.3	19.6
																																								1083.7	23.3	1286.41	10.1232			1087.2	20
																																								1098.9	28	1289.87	18.7663			1116.4	20.1
																																								1119.3	31.8	1280.13	11.4628			1124.8	21.5
																																								1119.8	20.4	1307.08	31.6723			1116.9	18
																																								1120.5	24.9	1362.45	9.45697			1160.4	16.2
																																								1127.7	55.8	1424.17	12.0218			1136.6	20.1
																																								1128.3	52	1424.09	6.6826			1150.5	18.6
																																								1128.4	20.7	1439.56	9.63064			1223.6	18
																																								1133.5	51.8	1473.73	10.1806			1263.4	19.1
																																								1138.6	29.6	1506.83	10.8214			1248.8	13.6
																																								1141.4	49	1520.45	8.20287			1305.6	17
																																								1146.6	26.6	1560.51	22.7231			1277.3	22.1
																																								1148.7	20.5	1585.05	8.56393			1282.8	24.5
																																								1149.5	27.2	1737	8.15839			1328.8	22.5
																																								1150.9	19.9	1748.96	12.5916			1342.6	16.7
																																								1152.6	38.3	1840.19	10.8565			1327.8	18.6
																																								1154	25.6	2139.61	14.2997			1312.7	18
																																								1154.7	56.9	2676.78	26.386			1352.2	18
																																								1157	60.3	2685.59	12.8052			1371.9	22.8
																																								1163.4	19.8	412.766	1.44064			1418.3	17.9
																																								1165.4	31.5	420.142	1.95367			1450.2	18.6
																																								1165.6	28.4	420.191	2.61943			1408.2	17.7
																																								1166.5	22	425.135	3.57391			1411.9	13.2
																																								1166.8	21	429.277	3.39455			1448	22.4
																																								1172.5	35	431.489	3.5427			1460.6	12.8
																																								1175.1	36	431.597	2.78438			1765.9	20.1
																																								1185.6	57.8	435.301	4.4878			1574.4	17
																																								1190.7	27.1	436.897	4.03531			1637.6	21.1
																																								1193.5	35.9	436.919	7.58929			1556.5	22
																																								1194.1	19.8	439.865	3.33448			1481.2	17.7
																																								1200.6	25.4	439.974	3.84865			1682.6	20.2
																																								1206.5	20.7	440.885	2.47342			1642.3	18.3
																																								1206.8	61.7	441.174	3.98032			1759.5	15.7
																																								1209.2	73.2	441.38	2.71758			1671.3	19.5
																																								1213.1	50.8	443.128	5.99588			1654.8	18.7
																																								1215	29.4	443.747	2.58541			1752.9	20.3
																																								1231.4	19.6	446.065	3.21957			1747.1	16.7
																																								1239.7	115.9	446.468	3.90738			1777.6	10.8
																																								1245.7	67.2	447.555	3.02847			1798.5	12.3
																																								1251.2	19.6	456.287	4.11711			1827.5	21.3
																																								1253.2	23.5	1049.26	13.9109			1984.8	19.9
																																								1268.4	19.5	380.711	6.63431			1857.1	20.5
																																								1274.8	33.1	395.218	5.70542			1801.6	14.3
																																								1276.6	28.9	402.948	4.37239			1906.2	20.3
																																								1288.9	19.5	407.209	4.08264			1875.9	16
																																								1296.4	81.4	409.797	4.36617			1986.9	19.8
																																								1302.3	41.8	414.359	4.60622			1920.8	19.9
																																								1306.6	19.5	416.935	5.53679			1977.7	15.9
																																								1309.7	31.6	419.142	3.23356			1961.7	17.1
																																								1317.6	35.3	422.085	4.68804			1974	15.9
																																								1330.6	19.4	424.849	2.38479			1918.7	15.2
																																								1367.7	100.8	430.901	3.07958			1934.1	12.1
																																								1424.7	24.3	432.369	4.41101			1862.6	18.9
																																								1440.2	35.5	433.299	1.66947			1897.3	16.2
																																								1441.8	22.3	453.897	4.36214			1987.8	19.7
																																								1442.5	19.1	458.45	5.20168			1930.8	12.8
																																								1443.8	39.3	462.524	6.0972			2026.2	19.5
																																								1449.8	21.7	468.869	4.08353			2011.7	13.9
																																								1455.1	19.2	473.809	5.54773			2029.9	14.5
																																								1459.2	22.3	505.949	4.98701			1999.9	15.6
																																								1460.5	24	534.372	5.72456			2264.2	13.9
																																								1463	22	535.094	3.0536			2252.2	15.8
																																								1464.2	21.1	578.95	6.81265			2635.4	15.9
																																								1465.8	19	632.617	6.84282			2704.4	10.8
																																								1466.2	23.2	964.681	10.2338			2537.1	10.7
																																								1467.3	22.6	971.809	9.01014			2663.4	10.2
																																								1471.6	34.2	976.949	10.085			2749.6	18.2
																																								1476.7	34.4	978.315	20.5965			2731.8	10
																																								1487.8	54.2	983.676	9.15282			2826.6	15.7
																																								1499.2	53.9	988.275	9.58596			2746.6	18
																																								1506.3	30.2	1006.07	17.0278			2920.6	11.8
																																								1508.5	18.9	1018.41	12.2992			3045.3	14.5
																																								1511.1	18.9	1021.09	9.91608			444.1	6.4
																																								1519	34	1026.27	10.3785			470	7.4
																																								1545.1	54	1045.84	13.1738			605.8	7.1
																																								1685.5	26	1048.95	10.2661			659.4	16.1
																																								1703.2	39.4	1053.55	13.1277			840.8	33.2
																																								1824.7	18.1	1054.71	11.7911			1051.2	23.8
																																								1953.3	32.5	1055.56	11.4516			956.7	25.9
																																								2683.3	57.7	1059.67	12.8817			968.2	22
																																								2724.4	16.5	1084.69	11.1836			1025.7	17.2
																																								932.8	56.1	1085.88	12.2525			976.1	16.7
																																								950.4	46.2	1137.18	8.95454			1221.5	21
																																								978.7	45.2	1195.89	13.5787			1037.2	17.5
																																								998	20.3	1240.75	15.7013			1104.3	24.8
																																								998.3	73.1	1556.68	14.9989			1192.5	19.2
																																								999.4	68.2	1575.67	15.6037			1179.5	15.5
																																								1002.4	26.7	1607.67	15.9773			1065.6	9.3
																																								1004.5	86.1	1616.08	22.6944			1305.8	13.9
																																								1013.9	52.8	1659.04	33.4472			1256.3	22.5
																																								1017	29	1880.25	19.9934			1511.9	15.9
																																								1024.5	20.3	2548.13	30.9077			1204.4	9.8
																																								1028.9	61.6	414.918	1.75441			1210.5	23.5
																																								1036	30.5	415.21	4.10622			1331.1	16.4
																																								1036.8	52.1	418.732	4.14379			1297	13
																																								1041.8	71.1	420.012	5.1252			1344.6	18
																																								1043.5	22.8	421.308	4.57561			1324.1	22.8
																																								1043.5	34.9	438.445	5.16564			1434.4	15.8
																																								1049	59.7	461.754	1.97125			1362.7	13.1
																																								1050	20.2	473.223	4.53409			1428.5	15.6
																																								1050.2	26.7	623.853	6.34685			1462.7	13.4
																																								1057.3	55.7	782.731	7.24445			1446.8	15.3
																																								1059	21.9	804.501	11.0214			1481.2	21.6
																																								1068.3	29.6	919.858	8.47598			1387.3	11.3
																																								1072.5	49.6	944.695	4.90949			1497.7	8.4
																																								1077.9	72.9	951.595	8.99483			1446.1	23.2
																																								1079.5	53	951.748	8.73794			1577.9	21.3
																																								1081.4	41.6	955.055	10.364			1532	18.2
																																								1088.8	63.1	957.783	12.4202			1499.3	13.6
																																								1089.9	40.1	974.356	8.84381			1491.3	15.5
																																								1092.4	21.4	983.59	9.2415			1592.4	13.4
																																								1098.4	65.7	985.294	10.7998			1543.1	12.1
																																								1103.8	29.8	1003.07	10.565			1570.4	15.9
																																								1119.4	44.1	1006.58	9.64306			1706.6	19.5
																																								1120.6	45.1	1013.87	11.6507			1630.7	14
																																								1122.8	19.9	1037.4	10.5949			1622.2	13.6
																																								1125.4	31.5	1050.91	10.505			1617.3	12.1
																																								1127.7	57.7	1053.98	11.4868			1744.8	14.3
																																								1132.3	37.3	1069.74	7.72815			1579.9	14.9
																																								1133.7	31.7	1084.32	12.8802			1652.6	14.4
																																								1140.3	90	1087.29	10.5582			1757.6	20.8
																																								1151.3	19.9	1089.25	13.6645			2015.7	16.9
																																								1155.3	55.7	1114.72	9.84674			1499.5	18.9
																																								1155.7	25.3	1135.53	13.7548			1649.6	16.9
																																								1161.9	38.3	1135.83	11.1533			1748.4	20
																																								1162.4	36.7	1137.11	8.43562			1967.3	24.4
																																								1163.7	50.6	1143.64	10.5258			1650	14.7
																																								1165.1	32.3	1144.09	12.0207			1928.8	13.8
																																								1165.2	19.8	1147.42	12.2068			1721.8	17.3
																																								1166	19.8	1149.1	11.6445			1670.4	8.7
																																								1167.6	19.8	1191.44	8.98266			1649.3	13.8
																																								1170.8	31.7	1202.58	12.0214			1636.8	12
																																								1171.9	47.1	1214.71	12.2707			1884.7	14.9
																																								1173.2	46.1	1260.04	12.7364			1707.1	13.6
																																								1173.8	21.8	1297.64	8.84841			1679.9	20.4
																																								1174.3	33.8	1301.05	12.4803			1759.7	12.7
																																								1181.3	38.8	1364.69	13.281			1683.1	9.9
																																								1181.4	30.3	1445.55	26.08			1795.4	17.5
																																								1183.1	46.5	1475.72	10.4824			1797.6	13
																																								1183.8	19.8	1508.56	97.3012			1813.5	13.2
																																								1187.5	24.3	1537.69	15.2074			1754.1	17.2
																																								1193	52.4	1594.79	27.5112			1927.9	18.3
																																								1194.5	39.7	1615.75	22.8125			1957	18.3
																																								1198.4	27.4	424.952	3.4619			1881.9	13.1
																																								1201.8	25.4	429.148	1.2762			1938.3	12.9
																																								1204.2	38.4	437.38	4.1583			1854.6	14.1
																																								1213	59.7	494.917	4.70615			1994.6	10.6
																																								1213	19.7	531.206	2.60106			1981.5	13.6
																																								1220.5	76.7	634.473	7.74327			1765.4	20.4
																																								1226.2	21.6	656.601	6.18695			1968.2	13.7
																																								1234.5	29.2	793.762	8.91321			1862.6	13
																																								1237.1	19.6	858.492	2.35744			2108.1	12.7
																																								1255.5	27.6	883.798	4.74862			1973.7	14.4
																																								1285.9	21.6	969.543	10.4289			1876.1	12.9
																																								1286.9	63.5	984.836	9.32159			2024.8	11.3
																																								1300.8	28.8	985.796	10.2062			2014.2	19.6
																																								1324.4	45.7	997.976	9.16028			1997.6	11.4
																																								1333.8	26.5	1000.62	10.5767			2005.4	13.8
																																								1334.5	87.7	1008.25	10.4473			1986.7	8.1
																																								1340.7	79.5	1010.73	10.9728			2006.2	11.1
																																								1347	29.2	1039.51	9.49078			2033.9	14.8
																																								1351.7	19.3	1045.12	11.6841			2005.4	14.5
																																								1354.6	48.6	1106.74	10.7713			1972.1	12.2
																																								1357.3	54.2	1215.71	7.63421			1992.6	17
																																								1376.3	23.1	1245.58	10.2555			2262.6	11.7
																																								1429.5	34.3	1249.16	11.8763			2346.1	19.8
																																								1450.7	22.5	1258.23	12.0343			2479.7	7.5
																																								1455.6	25.3	1268.48	11.9404			2390	19.9
																																								1473.7	49.5	1308.37	12.0193			2592.5	12.3
																																								1477.3	43.6	1338.61	13.062			2597.7	13
																																								1478.8	52.8	1353.43	6.85853			2730.2	13.5
																																								1484.7	29.7	1414.1	15.9475			2879.4	11.6
																																								1490.9	23.3	1431.42	16.9863			2753.3	11.7
																																								1501.6	39.5	1437.31	19.2749			3277.2	6.7
																																								1503.5	18.9	1510.5	17.965			401.5	5.4
																																								1513.3	52.7	1523.24	23.5823			417.8	5.2
																																								1527.4	41.6	1538.43	5.07431			420	5.7
																																								1636.3	31.9	1561.69	17.2257			421.7	5.4
																																								1887.8	48.1	1604.31	17.8476			517.1	6.2
																																								2660.8	27.3	1606.51	28.4413			521.8	7.6
																																								553.2	5.6	1613.15	6.63503			547	4.8
																																								938.5	87.3	1620.22	15.7136			696.4	10.5
																																								966.4	47.6	1629.52	12.8619			994.5	17.5
																																								974.9	50	1635.77	22.8053			1074.7	17.5
																																								1005.7	66.7	1647.11	12.3759			1140	19.7
																																								1022.6	20.3	1647.28	20.014			1029.4	12.6
																																								1024.7	72.3	1658.04	16.5303			955.2	17.9
																																								1026.4	25.1	1660.63	20.1302			1052.9	23.2
																																								1027.1	65.4	1707.35	7.78473			1042.7	10.6
																																								1035.7	38.8	1751.94	14.3479			1120.2	16.8
																																								1050.8	20.2	1806.37	8.37663			1086.7	21.8
																																								1054.3	27	1817.58	12.647			1187.3	20
																																								1062.1	27.6	1822.25	22.9621			1062.9	21.6
																																								1064.1	74.8	1863.97	13.5187			1026.9	11.1
																																								1070.8	32.2	2460.82	10.1953			1146.1	21.4
																																								1075.3	20.1	2536.6	15.4177			1039	27.5
																																								1083.6	26.7	2700.46	12.6169			1149.6	19.7
																																								1086.4	25.4					1114.7	11.8
																																								1090.1	38.3					1069.8	15.9
																																								1093.3	39.9					1083.1	13.1
																																								1107.6	49.8					1038.1	18.8
																																								1108.1	40.4					1123.2	16.6
																																								1123.9	41.9					1122.7	17.6
																																								1126.4	48.4					1109.6	16.7
																																								1128	57.3					1123.7	20.9
																																								1130.2	34.2					1095.7	21.6
																																								1145.7	21.7					1214	22.5
																																								1149.8	52.4					1231	21.3
																																								1152.6	23.2					1185.8	20.2
																																								1154.5	49.8					1177.5	18
																																								1166	19.8					1212	9.4
																																								1174.1	36.4					1277.2	20.3
																																								1175	20.2					1325.8	22.8
																																								1175.5	30.9					1285.4	15.4
																																								1175.9	25.7					1381.9	21.2
																																								1179.9	29.5					1393.4	21.2
																																								1189.5	74.7					1325.8	11.5
																																								1194.8	29.8					1368.6	11.1
																																								1195.9	21					1683.5	15.7
																																								1197.9	22.5					1412.3	19.8
																																								1198.6	19.7					1486	15.6
																																								1199.1	19.7					1497.8	19.3
																																								1201.9	27.8					1501	15.7
																																								1202.7	19.7					1513.6	19.2
																																								1206.2	19.7					1487.8	15.6
																																								1208.2	43.5					1494.6	13.3
																																								1209.4	118.6					1484.5	14.1
																																								1212.3	41.1					1537	17
																																								1230.9	35.4					1662.8	11.6
																																								1239	23					1682.3	14.9
																																								1243.8	46.3					1769.4	18.8
																																								1248.9	36.6					1887.7	10.8
																																								1260	33.4					1849.3	10.2
																																								1269.2	43.9					1643.4	10
																																								1279.8	123.8					1789.4	11.6
																																								1304.6	21.8					1749.7	17.5
																																								1314.3	23.9					1780.3	14.5
																																								1324.2	34.9					1792.7	8.6
																																								1337.8	39.5					1994.6	15.3
																																								1340.7	21.8					1979	18.6
																																								1350.2	25.5					2096.4	12.4
																																								1370.4	75.2					1976.2	10.4
																																								1381.4	25.8					1887.4	14.4
																																								1384.6	23.8					2000	18.7
																																								1406.8	25.2					1987.3	18.7
																																								1414.6	24.5					1897.8	13.8
																																								1422.6	19.1					1992	18.4
																																								1424.4	34.4					1867.4	14
																																								1437.5	41.4					1951.7	7.1
																																								1440.1	30.1					1969.9	9.8
																																								1447.2	21					1998.9	17.9
																																								1461.1	21.5					2000.8	18.6
																																								1471.6	31.3					2077.9	9.6
																																								1475	32.8					1988.2	10.4
																																								1475.5	30					1987.2	18.9
																																								1482.7	23.7					2049.4	14.6
																																								1482.9	19					2001.4	14.1
																																								1486.2	23.7					2071.8	15.5
																																								1492.6	28.2					2358.4	15.1
																																								1497.3	46.3					2596.5	9.4
																																								1499.2	48.9					2519.2	17.2
																																								1502.6	18.9					2573	7.5
																																								1521.1	21.9					2646.4	12.8
																																								1536.9	43.8					2587.4	13.3
																																								1554.2	50.9					2732	7.6
																																								1563.3	30.6					2599.4	6.9
																																								1667.1	18.5					2750.8	14.3
																																								1825.3	24.5					2730.6	8.5
																																								2436.9	29.8					2762.5	8.2
																																								2570.9	49.2					2811.6	12
																																								2693.8	28.9					2704.9	11.2
																																								2714.8	39.3					2823.7	9
																																								2757.1	16.4					2766.7	6.4
																																								461.1	5.7					2833.1	14.2
																																								462.7	4.5					3636.8	12.2
																																								463.7	8.7					398.2	8.2
																																								478.1	4.8					407.9	16.9
																																								667.8	6.3					415.6	7.1
																																								692.8	17.6					420.3	7.1
																																								1005.2	33.9					421	13.4
																																								1016	27.6					424.2	4.1
																																								1021.8	37.9					433.4	7.7
																																								1024.2	20.2					433.6	7
																																								1024.5	51.3					436.4	10.4
																																								1035.9	20.2					439.5	5.5
																																								1045.4	27.2					439.8	7.2
																																								1049.2	21.4					440.6	11.2
																																								1058.3	30.8					456.8	12.4
																																								1082.9	36.8					512.2	20.9
																																								1083	32.5					518.1	8.2
																																								1083.2	20.1					533.3	8.4
																																								1090.3	20.9					539.1	5.6
																																								1098	48.2					542.5	22.6
																																								1100.6	30.2					550.3	8.9
																																								1103.1	24.3					553.6	8.3
																																								1111.2	37.2					559.8	10.2
																																								1112.8	44.9					566.5	9.6
																																								1134.5	31.3					593	19.3
																																								1140.8	35.5					619.2	25.5
																																								1144	27.8					633.3	20.6
																																								1144.2	27.8					633.5	11.7
																																								1144.9	19.9					660.1	8.2
																																								1150.8	23.3					838.3	15.1
																																								1156	19.8					1010.8	16.2
																																								1157.9	34.3					1056.5	17.1
																																								1166.4	59.1					1080.1	14
																																								1173.9	19.8					1149.8	14.9
																																								1179.9	22					1099.4	25.9
																																								1184.7	51					1101.8	25.8
																																								1188.6	23.5					1084.1	14.3
																																								1198.1	46					1104.1	25.3
																																								1208.9	51.7					1133.1	17.5
																																								1212.6	37.6					1146	16.6
																																								1217	40.1					1241.6	19.5
																																								1224	71					1130.8	15.8
																																								1228.3	31.2					1218.2	13.5
																																								1234.3	73					1289.7	27.2
																																								1245.4	53.7					1344.9	11.8
																																								1257.2	31.3					1327.4	15.1
																																								1291.4	43					1383.5	26.3
																																								1294.7	35.8					1376	17.7
																																								1296.1	53.3					1395.4	26.3
																																								1303.5	26.2					1469.8	24.7
																																								1323.5	19.4					1613.9	18.1
																																								1328.1	36.6					1656.3	14.7
																																								1335.1	27.1					1492.3	13.9
																																								1335.5	19.3					1628.6	22.9
																																								1338	53.2					1676.4	16.2
																																								1347.6	19.3					1651	25.2
																																								1352.4	30.1					1722.9	14.4
																																								1362.4	31.6					1646.3	15.3
																																								1378.7	20.3					1653.7	13.6
																																								1392.1	41.4					1683.4	17.5
																																								1392.5	24.8					1766.5	12.3
																																								1397.2	29.5					1695.9	25.1
																																								1398.1	24.8					1864.9	14
																																								1406.7	24.3					1686.9	25.3
																																								1408.2	50.6					1629.5	19.4
																																								1417	78.9					1653.2	14.6
																																								1459.6	40.1					1632.5	14.8
																																								1459.7	23.4					1630.5	13.6
																																								1466.3	26					1979.1	12.2
																																								1475	26.4					1724.7	15
																																								1475.6	25.6					1725.8	23.1
																																								1478.1	33.6					1743.5	17.5
																																								1483	28.8					1907.6	16.3
																																								1487.2	36.4					1778.3	13.8
																																								1495.5	41.2					1790.9	22.8
																																								1496.3	18.9					1870.7	11.8
																																								1497.1	36.3					1879.3	24.3
																																								1499	36.7					1975.6	24
																																								1507.8	29.8					1997.6	13.8
																																								1508.2	33.8					2084.8	14.8
																																								1512.1	18.9					1834.7	14.8
																																								1512.5	21.5					1828	13.2
																																								1521.6	28.3					1879	11
																																								1540.7	18.8					1934.3	18.3
																																								1554.3	34.5					1992.5	13.4
																																								1631.9	29					1945.8	24.2
																																								1640.7	18.6					2004.1	13.9
																																								1644.6	40.5					1953.1	14
																																								1659.4	22.4					1944.1	15.7
																																								1680	34					1932.1	12.4
																																								1764.9	20.3					1958	10.8
																																								1914.9	30.5					1971.5	24.1
																																								2001.7	26.3					1911.1	22
																																								2552.3	52.8					1998.8	14.7
																																								2721.3	25.9					2015.4	12.3
																																								2743.8	16.5					2236.8	23.2
																																								2977.5	16.1					2603.2	12.7
																																								3302.7	24.2					2699.4	11.9
																																								1011.1	85.6					2547.2	13.5
																																								1015.4	23.7					2692.9	9.9
																																								1017.9	20.3					2777.9	11.4
																																								1027.3	25.5					2688.7	12.7
																																								1037.4	71.5					2914.4	12.4
																																								1040.9	90					3789.2	8.8
																																								1041.8	33.7					421.2	4.7
																																								1041.9	40.4					423.3	5.6
																																								1055.4	51.6					426	5.9
																																								1058.2	26.2					942.5	18.1
																																								1061.9	58					1008.6	36.4
																																								1062.2	35					1018.9	13.7
																																								1062.3	20.4					1028.3	15.6
																																								1069.4	45.2					1013.3	21.6
																																								1071.6	62.2					1047.2	18.2
																																								1073.1	27.4					1292.2	17.8
																																								1075.6	33.3					1106.7	19.5
																																								1076.7	22.9					1036.4	13.8
																																								1086.3	20.1					1083.8	20.9
																																								1087.9	72					1013.5	20.2
																																								1092.2	41.5					1108.9	27.2
																																								1092.5	58.8					1143.5	23.8
																																								1096.8	29.1					1060.8	14.1
																																								1103.9	22.2					1056.6	13.7
																																								1104.5	62					1116.2	24.3
																																								1109.2	26.8					1119.9	21.5
																																								1119.8	45.5					1227.3	10.6
																																								1146.4	54.9					1143.8	20.7
																																								1150.9	42.5					1156.6	17.7
																																								1155.6	30.8					1153.4	23.3
																																								1161	49.2					1159.3	15
																																								1161.8	41.8					1227.9	15.3
																																								1165.6	26					1422.3	12.9
																																								1167.7	32.1					1277.1	26.6
																																								1169.6	29.5					1284.9	10.3
																																								1172.5	37.6					1312.1	10.1
																																								1174.5	21.2					1338.6	15.9
																																								1175.6	21.2					1357.3	9.9
																																								1176.7	34.7					1318.5	14.2
																																								1178.5	30.1					1479.5	8.3
																																								1178.7	31.1					1376.3	19.6
																																								1189.9	19.8					1417.6	13.4
																																								1193.3	60					1441	16.9
																																								1197	47.4					1369.6	23
																																								1197.8	57.8					1425.3	7.4
																																								1202.1	28.7					1483.2	14.7
																																								1204.9	34					1669.6	22
																																								1210.8	43.9					1607.1	7.5
																																								1215	25.9					1575.1	12.2
																																								1216.7	25.4					1590.2	14.2
																																								1221.7	25.6					1612.4	13.3
																																								1221.8	42.7					1597	14.4
																																								1222	21.6					1830	15.6
																																								1237.6	19.6					1543.5	13.5
																																								1238.3	33.8					1624	11.8
																																								1248.1	36.2					1643.7	22
																																								1250.6	24.5					1634.4	12.5
																																								1252.4	49					1635.7	8.1
																																								1265.5	38.9					1624.9	20
																																								1272.7	44.3					1595.4	11.6
																																								1276.8	23.8					1758.9	14.8
																																								1316.3	54.3					1728.3	14.8
																																								1337	35.4					1678.9	11.9
																																								1341.5	28.6					1798.7	21.1
																																								1361.8	36.4					1745.4	11.9
																																								1372.3	19.3					1750.8	12.8
																																								1403.1	27.2					1973.7	20.8
																																								1416.5	19.1					1762.1	18.7
																																								1420.2	56.5					1731.2	13.7
																																								1421.9	35					1799.8	16.6
																																								1424.9	56.2					1740.1	6.7
																																								1427.7	27.1					1737.6	13
																																								1430.2	44.1					1772	13.6
																																								1441.3	36.4					1773.6	14
																																								1460.1	36.9					1880.7	13.9
																																								1465.8	68.8					2072.7	13.1
																																								1473.9	40.8					1891.8	21.2
																																								1474.8	67.2					1965.7	9.4
																																								1476.4	19					1883.6	21.1
																																								1484.5	34.5					2300	19.5
																																								1486.3	29.6					1970.1	16.7
																																								1486.4	36.4					1943.8	9.7
																																								1488.2	23.3					1923.1	12.1
																																								1490.7	52.9					2012.3	10.8
																																								1491.1	83.6					1939.4	10.1
																																								1492	69.7					1859.7	18
																																								1492	20.8					1946.5	16.9
																																								1493	45.8					1962.5	11.2
																																								1497.7	27					1936	12.3
																																								1510.7	55.1					1991.4	9.8
																																								1522.9	25.1					1991.3	13
																																								1550	50					1996.4	13.8
																																								1654.7	137.9					1985.9	11.1
																																								1666.9	57.4					2043.7	12.2
																																								1701.1	39.8					1857.1	26.7
																																								1772.6	28.5					2014.9	10.9
																																								1884.5	84.8					2077	14
																																								2756.4	24.8					2037.1	20.6
																																								1328	17					2694.6	6.1
																																								1190	23					2496.1	10.3
																																								1163	17					2519.4	9.4
																																								1300	20					2701.5	6
																																								1001	27					2739.2	19.3
																																								1100	26					2716.5	10.5
																																								1121	27					2694.6	9.2
																																								1173	31					2728.6	6.5
																																								1185	12					2740.1	19.3
																																								1182	22					2721.6	10.4
																																								1169	16					2764.8	9.8
																																								992	23					2830.8	15.6
																																								1021	21					2984.9	9.5
																																								1018	15					3010	5.1
																																								1115	16					376.4	12.3
																																								1438	75					441	12.2
																																								1143	21					458.8	18.2
																																								1383	15					538	9.2
																																								1203	45					546.3	12.6
																																								1156	41					558.1	20
																																								1289	44					565.2	15.8
																																								1429	49					634.4	15.8
																																								1038	38					642.5	18
																																								1119	40					645.7	14.1
																																								1156	40					651.6	16.6
																																								1138	40					663	26.3
																																								1193	42					718.4	12.1
																																								1467	52					894.9	18.7
																																								1229	42					999.1	13.6
																																								1157	43					1014.2	12.2
																																								1021	37					1062.3	18.5
																																								1040	11					1054.8	16.6
																																								1148	15					1051.7	28.4
																																								1108	54					1044.5	14.6
																																								1226	8					1210.6	20.2
																																								985	35					1084.6	15.9
																																								1110	10					1173.2	22
																																								1140	24					1092.9	14.8
																																								1134	21					1346.9	26.2
																																								1402	16					1154.5	17.4
																																								1510	38					1235.1	14.2
																																								1490	25					1267.4	17.8
																																								1044	9					1178.4	19.3
																																								1184	12					1290.9	16.4
																																								1180	11					1192.5	18.7
																																								1490	14					1188	13.3
																																								884	35					1238.6	25.8
																																								1219	13					1254.5	10.1
																																								1009	13					1352.6	13.7
																																								1040	19					1237.1	12.3
																																								1242	24					1284.5	11.4
																																								1189	14					1306.4	11.8
																																								1221	30					1329.8	15.8
																																								1049	18					1624.5	11.6
																																								966	28					1421	11.8
																																								977	14					1425.2	17.7
																																								992	15					1353.2	9.9
																																								1004	24					1666	14.9
																																								1244	42					1473.8	20.2
																																								860	7					1383.8	20.3
																																								1329	15					1635.1	15
																																								1012	26					1499.5	12.7
																																								944	12					1397	9.3
																																								1056	18					1424.5	12.1
																																								1022	29					1852	12
																																								1139	28					1644.2	12.8
																																								988	9					1796.5	11.8
																																								1105	14					1678.9	18
																																								1779	20					1784	9.4
																																								1005	18					1708.4	18.4
																																								1364	19					1737.3	11
																																								1114	25					1668.9	14.5
																																								1012	11					1682.8	9.6
																																								1293	20					1703.9	12.9
																																								1310	13					1857.4	8.9
																																								1059	16					1668.9	14.7
																																								1149	33					1707	9.5
																																								950	20					1668.4	10.7
																																								1340	29					1833	13.2
																																								1195	13					1841.8	8.7
																																								913	8					1849.9	9.1
																																								1190	23					1811.5	18.4
																																								1055	28					2007.9	12.2
																																								992	5					1883	9.1
																																								1036	21					1972.5	9.7
																																								1169	39					1982.3	14.4
																																								607	14					2038	12.1
																																								1054	16					1909.1	12.6
																																								1040	11					2072.6	10.4
																																								1106	21					2003.1	13
																																								1392	21					2003.6	10.3
																																								1047	8					1951.8	13.7
																																								724	5					2037	9.8
																																								974	19					2102.5	9.8
																																								1039	23					2420.8	10.4
																																								1151	20					2761.2	8.5
																																								1172	19					2773.5	9.2
																																								1082	16					2708.6	11.9
																																								1182	20					2523.7	12.6
																																								1199	23					2707.3	17.1
																																								1157	17					2942.8	9.6
																																								1117	19					2878.7	7.3
																																								1065	38					2694.5	8.4
																																								1302	22					2822.8	9.2
																																								1131	21					2811.8	7.8
																																								1083	28					1853.9	35.1
																																								707	19					1875.1	26.9
																																								911	17					1958.1	22.4
																																								957	24					1802.2	15.5
																																								1411	34					1939.8	17.1
																																								1161	33					1930.2	30
																																								883	17					1859.7	20.6
																																								1374	13					1859.4	20
																																								476	9					1797.7	22
																																								1160	21					1857.2	23.3
																																								1220	16					1840.1	25.6
																																								1194	72					1875.3	29
																																								1062	11					1842.2	14.8
																																								690	10					1807	17.7
																																								1156	26					1882.9	16.9
																																								954	33					1800.2	34.9
																																								1004	15					1766	37.9
																																								1127	26					1922.9	21
																																								1266	50					1818	34.2
																																								1095	32					1865	31.7
																																								1020	17					1802.8	25.4
																																								950	27					1812.8	21.4
																																								1195	23					1824.1	34.8
																																								1121	18					1868.5	16.9
																																								1038	22					1904	19.2
																																								1062	24					1844.9	26.8
																																								1205	15					1865.5	34.1
																																								1136	18					1785.4	33.8
																																								1148	13					1825.3	19.3
																																								1026	23					1898.1	29.5
																																								1301	21					2026.2	23.3
																																								992	21					1803.9	32.1
																																								1294	10					1669.7	32.2
																																								1272	22					1785	36.8
																																								1405	24					1831.1	26
																																								1122	15					1918.4	14.7
																																								1177	26					1843.8	30.1
																																								1247	118					1858.6	30.8
																																								1188	29					1866.5	30.4
																																								1074	13					1900.6	23.1
																																								1213	24					1838.4	22.3
																																								1415	19					1837.6	20.8
																																								1238	11					1892.8	16.3
																																								903	8					2039.3	26.4
																																								982	17					1825.5	27.6
																																								1393	28					1826	34.2
																																								1162	6					1977.9	25.3
																																								1250	23					1839.7	21.7
																																								1041	16					1856	28.4
																																								1161	22					2286.3	28.6
																																								1556	20					1867.4	22.4
																																								1373	19					1942.9	32.4
																																								984	13					1897.9	12.3
																																								1022	12					1866.4	10.8
																																								1081	14					2450.4	26.2
																																								1010	8					2565.5	23.8
																																								1025	19					2296.3	25.5
																																								1315	18					2194.3	21.2
																																								1213	13					2439.7	25.7
																																								2701	61					2364.7	18.4
																																								2825	69					2786.9	27.1
																																								1315	19					2715.5	22.7
																																								1284	17					2501.6	19.5
																																								1308	17					2723.9	13.7
																																								991	6					2761.7	17.9
																																								1304	14					2706.1	27.3
																																								1554	13					2519.5	22.5
																																								1141	24					2522.3	30.6
																																								1093	22					2686.2	30.7
																																								1189	20					2685.6	18.2
																																								1210	20					2863.8	27.3
																																								1351	17					2852.5	27.1
																																								1115	30					2737.2	14.4
																																								1014	13					2762.4	20.7
																																								1067	6					2769.2	12.4
																																								1427	37					2752.4	27.1
																																								1326	14					2729.8	22.7
																																								1407	25					2724.3	19.7
																																								1156	18					2787.9	23
																																								1614	19					2761.7	18.6
																																								787	8					2717.2	27.1
																																								1174	15					2878.7	17.2
																																								1254	13					2831.7	18.4
																																								1059	12					2698.5	32
																																								989	13					2712.7	30.7
																																								1140	7					2846.8	26.7
																																								1337	14					2848.6	13.9
																																								1192	11					2844	24.4
																																								712	7					2946.4	26.9
																																								1082	28					2840.1	19.2
																																								909	6					2797.4	30.7
																																								1480	25					2838	18.7
																																								1251	16					2839.2	24.5
																																								1251	24					2841.1	30.1
																																								1124	10					2853.3	27.7
																																								1134	8					377.6	5.7
																																								1193	17					383	4.4
																																								1016	16					383.8	4.3
																																								1001	14					402.7	6.3
																																								1070	39					404.3	3.3
																																								1134	8					406.8	4.2
																																								1211	15					416.8	6.7
																																								1176	28					417.5	10.8
																																								1086	12					418.9	6.4
																																								1355	16					427.3	3.5
																																								1191	23					427.3	3.3
																																								1014	18					436.8	3.7
																																								819	9					436.8	3.7
																																								1001	13					438.4	5.4
																																								1096	19					439.5	3.5
																																								1186	24					508.1	4.6
																																								1003	13					519.6	7
																																								1062	15					523.9	4.2
																																								1102	10					524.5	5.5
																																								1778	29					525.9	15.3
																																								1036	11					526.5	4.8
																																								873	8					527.4	7
																																								1036	10					527.8	5.1
																																								2512	64					530.7	5.9
																																								978	24					531.9	5.9
																																								1222	372					533.8	4.7
																																								1281	9					534.7	5.3
																																								1330	20					535.2	6.3
																																								968	13					536.1	3.6
																																								1058	7					537.3	9.2
																																								1130	16					537.5	6.7
																																								1098	21					539.2	13.5
																																								902	17					541.2	8.9
																																								849	6					541.4	5.1
																																								1166	35					541.5	7.1
																																								1133	30					541.8	4.9
																																								1353	18					541.9	7.4
																																								1262	25					543.1	5.8
																																								1034	24					545	8.9
																																								1116	17					546.7	6.7
																																								888	15					549	3.9
																																								960	27					549.5	4.6
																																								1246	22					550.2	6.8
																																								690	16					550.9	9
																																								1127	11					552.8	6.4
																																								976	17					556.6	13.9
																																								1026	17					557.6	7
																																								1073	11					559.4	8.9
																																								1257	18					559.8	4.3
																																								1018	13					559.8	6.2
																																								1298	9					561.1	6.3
																																								1406	22					562	5.9
																																								1051	14					564	5.1
																																								1141	13					564.8	14.1
																																								1061	21					572.2	6.1
																																								975	12					584.7	6.4
																																								1021	8					593.1	9.8
																																								1033	40					613.2	9.4
																																								935	6					614.4	7.2
																																								1003	22					616.8	6.3
																																								983	14					625.1	6.8
																																								1203	25					628.4	15.7
																																								1004	21					628.6	9.1
																																								1183	22					642.6	5.2
																																								1336	19					645	5.2
																																								1258	14					646	7.7
																																								1754	30					649.2	9.8
																																								1217	17					651.4	7.9
																																								1156	18					653.5	8.2
																																								1027	11					656.1	5.4
																																								950	10					656.6	5.4
																																								895	21					656.8	7.5
																																								1206	22					685.7	13.9
																																								1156	14					692.6	7
																																								1709	19					706	5.7
																																								2018	21					967.7	13.8
																																								2009	29					977.7	12.4
																																								1271	11					1057.5	14.2
																																								2107	25					1277.9	18.7
																																								988	12					1190.2	13.6
																																								1192	16					1386.6	13.6
																																								990	16					1160.1	10.8
																																								979	13					1333.6	12.5
																																								516	21					1323.5	14.3
																																								2838	33					1377.2	18
																																								999	21					1619.8	11.2
																																								1057	14					1490.9	11
																																								1201	20					1651.4	15.8
																																								1210	12					1668	7.8
																																								1932	31					1679.1	13.9
																																								1810	36					2131.9	10.9
																																								633	9					1865	8.5
																																								1898	42					1916.4	10
																																								1813	25					1841.4	11.6
																																								1096	20					1871.5	17.1
																																								1165	47					1913.4	12.6
																																								1253	22					1914.3	8.6
																																								1239	94					2018	11.7
																																								1173	22					2089.3	8.4
																																								1206	41					2012.1	9.9
																																								1151	14					2047.9	15.4
																																								1130	99					2408	9.3
																																								955	16					2711.2	10.9
																																								1015	23					370.2	4.6
																																								1106	13					370.6	4.3
																																								963	16					374.3	4.5
																																								1046	17					384.6	4.8
																																								806	14					391.1	7.2
																																								1042	30					393.6	8
																																								1167	17					411.5	8.5
																																								817	11					415.7	9.3
																																								1313	13					418.2	4.7
																																								1006	11					420.3	7.2
																																								776	21					421.1	8.2
																																								1305	32					421.7	4
																																								1084	11					422.4	5.1
																																								1124	25					428.5	5
																																								908	18					432.6	5.5
																																								765	18					433.6	5.4
																																								1207	14					438.3	5
																																								1226	12					441.4	6.3
																																								1104	8					450.6	10.1
																																								1058	12					463.3	5.4
																																								1098	19					514.2	7
																																								823	14					521.2	5.8
																																								1013	24					523.3	6
																																								1091	23					526.3	11.7
																																								1081	12					526.4	20.4
																																								1215	18					528	7.6
																																								1223	12					531.3	6.5
																																								1055	47					531.9	7.6
																																								1226	30					533.1	9.2
																																								1249	14					534.5	12
																																								1039	29					534.6	6.1
																																								1236	27					535.6	6.8
																																								1280	36					536.6	12.1
																																								960	21					543.6	8.4
																																								1215	26					544.4	9.3
																																								1194	20					547.8	9.8
																																								1170	24					548.3	8.4
																																								1100	18					549	6.3
																																								1163	13					551.9	6.5
																																								988	14					552.5	4.9
																																								1298	48					553.1	8.1
																																								953	21					556.9	7.4
																																								1069	34					561.4	7
																																								1031	16					575.9	6.6
																																								689	8					578.3	8.4
																																								1093	32					582	7.9
																																								898	23					596.8	7.2
																																								987	22					605.7	7.1
																																								1281	34					610.2	10.2
																																								1097	18					618.9	9.4
																																								1030	32					622.4	13.7
																																								1068	21					628.4	15
																																								857	25					633.8	6.3
																																								1069	39					634.6	7.4
																																								807	14					634.6	8.4
																																								867	30					636.7	8.8
																																								807	29					642.6	9.3
																																								1053	31					645.2	11.1
																																								1328	43					646.5	6.2
																																								934	27					651.7	7.6
																																								1172	33					656	10.1
																																								1155	22					683.6	9.9
																																								969	11					698.4	6.9
																																								1096	16					775.2	13.3
																																								1072	12					941.8	20.9
																																								1081	9					989.5	16.8
																																								1004	16					1004.2	17.7
																																								1002	13					1067.9	21.2
																																								1017	10					1091.4	20.3
																																								1162	21					1145.4	19.9
																																								1195	19					1132.8	17.1
																																								1033	24					1236.6	19.1
																																								1063	10					1240.9	15.1
																																								1081	7					1259.6	19.5
																																								1048	8					1248.9	16.7
																																								1065	16					1312.9	23.2
																																								1218	20					1335.9	20.6
																																								1032	25					1531.5	16.6
																																								1042	9					1419.6	15
																																								1049	15					1766.1	15.5
																																								1057	13					1632.4	16.6
																																								1037	15					1671.5	14.6
																																								1041	27					1671.7	12.5
																																								1094	19					1761.7	15.3
																																								1126	22					1709	14.9
																																								428	22					1636.6	10.8
																																								1097	15					1844.6	13.4
																																								1135	26					1763.9	12.5
																																								1042	35					1847.9	17.7
																																								1186	38					1869.4	14.4
																																								1013	13					1989	15.2
																																								1068	41					1919.5	19.1
																																								849	18					1914.3	11
																																								1242	41					1949.3	15.4
																																								1178	47					2393	14.8
																																								831	25					2725.3	14
																																								1296	32					2709.5	12.1
																																								1028	27					2554.3	11.9
																																								1196	26					2604.9	9.3
																																								1327	20					2857.1	10.3
																																								1309	23					2802.2	7.5
																																								753	20					2649	19.7
																																								1240	17					2913.8	15.3
																																								1218	45					364.2	6.2
																																								1010	23					376.9	8.9
																																								1251	22					381.6	8.6
																																								690	10					399.5	10.7
																																								1175	9					406.5	9.5
																																								1201	16					418.8	9.7
																																								1216	24					420.1	9.8
																																								1273	13					423.3	5.8
																																								1051	11					428.6	5.6
																																								1349	16					436.2	6.2
																																								1268	14					440.9	17.6
																																								553	3					447.1	17
																																								757	7					450.7	5.3
																																								1026	29					452.3	9.8
																																								1186	18					455.7	10.4
																																								1492	18					482	11.2
																																								1213	29					495.8	10.8
																																								1051	13					502.2	20.5
																																								1011	10					512.4	6.8
																																								1036	7					516.9	11.3
																																								1011	19					518.2	9.7
																																								1038	14					519.3	11.8
																																								1094	14					521	10.9
																																								948	10					524.1	5.7
																																								877	8					527.5	11.7
																																								1055	16					528.6	11.2
																																								1000	13					529.2	12.4
																																								1165	13					530.4	12
																																								1007	18					532.3	12.1
																																								1024	15					533.4	12.2
																																								1062	8					534.9	8.4
																																								1027	10					536.6	6.4
																																								1012	16					537.4	9.3
																																								930	13					539.4	11.1
																																								1221	11					541.8	8.1
																																								1040	15					542.6	5.8
																																								1039	14					544.4	7.9
																																								1049	24					545.5	8.9
																																								1011	12					546.3	8.6
																																								1030	17					550	6.9
																																								1095	19					550.2	20.8
																																								1055	20					553.5	6.2
																																								1243	30					556.2	21.2
																																								1098	15					558.1	6
																																								1180	14					559.2	6.3
																																								1143	8					561.6	8.3
																																								1358	13					563	7.3
																																								1014	12					570.7	7.3
																																								812	11					580.3	22.1
																																								1010	6					581	13
																																								1152	14					585.7	22.1
																																								1304	68					590.1	22.3
																																								1309	18					603	15
																																								1217	18					617.1	10.3
																																								986	15					617.7	12.7
																																								982	14					622.4	10.9
																																								997	12					622.4	13.1
																																								957	12					632.6	24.1
																																								1167	38					639.3	8.2
																																								821	8					643.9	9.2
																																								1135	13					664.8	7.4
																																								1184	9					671.2	7.6
																																								1154	8					674.8	9.7
																																								1029	16					677.1	11
																																								1043	20					678.2	7.5
																																								1513	36					979.7	10.6
																																								1194	22					1036	18.8
																																								1229	10					964.2	13.8
																																								1100	11					1054.7	12.5
																																								1030	12					1034.1	30.2
																																								1425	19					1124.4	12.7
																																								1021	13					1135.9	28.6
																																								1184	12					1215.4	14.1
																																								1112	28					1264.2	10.4
																																								1337	23					1347.8	23.4
																																								1317	12					1355.1	13.9
																																								1000	11					1404.1	9.7
																																								1468	25					1248.1	11.9
																																								1082	16					1601.5	12.3
																																								1030	33					1446.6	14.4
																																								1491	12					1691.7	10.4
																																								1048	53					1544.9	27.4
																																								1269	12					1696.1	26.3
																																								1084	10					1744.5	9.7
																																								1010	16					1642.4	12.2
																																								1024	15					1639.2	11.5
																																								1348	21					2046.2	25.6
																																								1429	30					1866.5	17.6
																																								1006	26					2060.9	8.8
																																								1385	16					2000.4	10.3
																																								1442	22					2031.3	10
																																								1166	29					2141.3	17.7
																																								1033	15					2719.9	11.1
																																								1387	19					363.3	7.4
																																								1579	21					365.1	7
																																								1092	22					365.2	15.3
																																								1006	13					365.7	11.1
																																								696	17					365.9	7.6
																																								684	26					369.8	7.2
																																								1185	26					370.6	6.7
																																								1162	14					371.2	10
																																								1067	13					372.2	7.3
																																								990	23					374.5	8.1
																																								1264	33					374.6	7.6
																																								446	9					374.6	15.8
																																								953	27					375.5	7.9
																																								820	10					376	15.9
																																								1064	12					377.4	7.4
																																								1013	19					377.8	13.6
																																								1159	12					379.4	7.4
																																								1301	25					382	16.9
																																								1131	11					386.2	16.3
																																								1002	16					387	7.1
																																								1136	26					389.1	17.8
																																								1033	6					389.4	13.6
																																								928	26					393.7	13.5
																																								1185	22					398.3	12.4
																																								1169	19					400.5	9.8
																																								1030	37					401.4	7.2
																																								1001	6					404.1	17.1
																																								1430	19					406.4	14.1
																																								1027	32					409.5	7.5
																																								1035	18					411.5	7.9
																																								1094	27					411.7	17.2
																																								1425	16					412.1	7.7
																																								966	16					412.8	15.4
																																								1012	13					413.1	12.5
																																								1205	11					413.1	17.2
																																								1381	21					417.3	14.6
																																								1201	23					418	8.8
																																								1125	10					419.2	11.9
																																								933	19					419.3	8.6
[truncated: 653 more rows]

## Sheet: 1-Morrowan-Atokan
AZ Shelf 1		MS11		MS10		MS01		MSGE313		BC01		BC02		CC01		ML01		MP-DZ1		1QZ19		SY-D		Tumbling Run		Pottsville Fm		Pocohontas		Lee		Racoon		Montevallo		Sewanee		KY-18-CB		VA-1-GN		OH-4-SN		OH-1-SS		Watahomigi		Manakacha1
409.117	3.96406	1048.01	19.2876	1020.81	19.552	356.31	8.81769	558.7	5.6	412.64	9.28758	496.582	9.95733	389.644	8.53964	376.369	8.15396	321.9	4.5	368.537	7.3336	371.937	4.70916	389	4.3	389.3	6.1	915.9	11	897.1	5.9	411.9	5.4	931	8.3	384.8	4.4	406.2	6.8	322.4	4.3	361.5	4.3	330	15.8	392.666	12.2284	409.117	3.96406
446.063	4.30981	1056.04	15.1198	1050.8	13.6001	459.219	10.8594	1025.5	41.7	482.011	7.66083	518.523	7.9162	507.224	8.40655	394.366	11.7849	338	6	392.938	9.74528	372.35	5.48125	407.5	5	399.6	4.4	965.2	9.6	909.1	6.9	449.7	6.2	943.8	8.5	396.8	4.8	406.6	8	359.5	5.4	390.2	5.3	336	14.1	409.955	7.74525	446.063	4.30981
979.215	47.9477	1056.44	20.3386	1054.62	14.7014	579.156	15.8811	1030.4	28.3	495.422	9.3745	518.525	7.89878	517.34	10.2595	400.317	9.31588	369.1	4.6	412.167	10.7314	376.537	4.93838	415.6	6	406.7	2.5	966.2	12.5	917.5	8.3	451.7	6.8	1013.2	5.6	405.2	5.1	406.8	10.7	367.6	6.5	394.6	7.8	380.9	7.4	415.999	20.0625	979.215	47.9477
995.615	41.9018	1056.87	12.7868	1055.78	28.67	968.902	21.5604	1038.8	103.8	523.191	11.1135	527.368	8.6213	523.491	8.84049	403.499	9.02302	369.6	4.55	413.35	10.6696	380.013	7.90317	418.6	2.4	419.4	3.3	991.7	53.4	941.2	7.9	462.8	4.7	1016	6	414.5	5	409	4.7	370.3	3.8	395.2	5.9	393.3	3.4	423.572	2.62372	995.615	41.9018
1011.54	27.3661	1056.89	21.2702	1083.79	18.4117	1011.69	21.48	1047	58.8	551.45	10.4154	528.045	9.64787	524.529	9.08676	414.676	8.29998	372	12.5	418.799	10.8852	396.06	5.33653	420.6	4.3	422.5	3.6	993	16.8	982.5	17.7	472.9	3.2	1017.4	7.8	435.4	10.4	423.9	11	391.3	10.7	398.5	6.4	393.3	2.9	442.4	10.2615	1011.54	27.3661
1022.36	53.5572	1060.09	25.0465	1093.19	18.7398	1017.94	28.1112	1062.7	60.5	608.514	13.7475	529.608	9.06463	525.598	9.46084	427.685	9.3409	378.6	3.9	422.896	10.9131	410.686	5.64088	421	4.4	424.9	3.5	998.1	13.1	985.6	11.7	498.6	7.4	1032.4	11	445.3	5.2	429	4.8	411.3	10.4	399.5	7.8	401.4	9.2	446.835	7.98665	1022.36	53.5572
1023	37.6943	1063.17	17.8715	1093.22	14.0089	1027.74	18.7198	1066.4	18.6	611.796	13.5299	1048.32	20.0021	526.826	8.98704	440.957	8.54015	399.3	2.9	424.258	10.3866	413.13	5.00167	428.8	4.5	426.1	4.5	1001.1	14.7	999.6	8.7	611.7	4.4	1034.4	13.1	455.1	5.9	429.1	3.8	412.5	4.1	399.6	6.7	420.3	11.1	451.662	6.06322	1023	37.6943
1024.31	37.2269	1063.17	15.8194	1097.4	16.1832	1053.56	19.3752	1068.3	39.8	992.62	15.6223	1425.84	11.9732	530.48	12.1522	457.162	9.9923	405	6.5	428.876	11.5204	429.046	6.08587	431.2	3.1	435.6	5.8	1005.2	10.5	1025.3	11.1	991.4	12.2	1042.2	8.4	459.6	8.1	429.7	6.5	422.6	4.1	401.7	6.6	423.1	2.9	465.478	5.83791	1024.31	37.2269
1029.75	49.511	1063.83	18.594	1098.74	14.452	1064.76	19.0129	1081.7	21.5	995.941	47.3724	1428.27	13.97	530.689	10.7802	460.395	11.1575	413	6	431.326	10.1754	431.732	4.70509	440.6	4.6	441.9	4.5	1009.2	9	1040.5	14.7	1049	16.9	1047.6	5.4	462.9	4.7	430.5	19.4	447.3	5.2	401.7	8.7	431.2	17.3	608.073	6.4991	1029.75	49.511
1033.72	37.8779	1068.37	15.3633	1102.18	22.6783	1066.14	24.7789	1092.7	26.9	999.063	21.386	1432.82	9.62663	1010.16	14.9667	461.602	13.1401	426.8	4.2	432.461	8.6406	439.657	5.7604	475.8	4	447.3	2.5	1013	16.6	1041.6	5.5	1062.8	13.2	1057.6	7.1	968.9	59.9	430.7	10.8	449.8	7.3	402.7	7.2	439.9	9.7	618.108	11.847	1033.72	37.8779
1043.27	20.2163	1069.66	12.8392	1103.76	18.4902	1076.99	20.2238	1112	28.7	1002.17	19.2574	1437	15.6373	1364.42	16.1813	471.768	10.087	429.9	5	432.546	10.8251	441.371	6.07163	521.7	7.8	450.4	2.9	1018.9	14.1	1050.2	14.5	1068.8	7.2	1063.7	8.5	985.7	16.2	445.2	5.6	462.1	6.6	403.3	9.7	452.8	4.3	1011.59	27.5842	1043.27	20.2163
1057.37	42.1255	1071	15.5182	1105.39	15.3768	1078.34	18.5804	1114.6	25.2	1003.38	20.657	1440.77	16.243	1370.11	17.9406	483.083	8.15512	431.5	5.5	435.205	9.48862	441.881	5.6676	555	8.1	450.7	3.3	1030	6.9	1055.1	8.5	1069.7	20.8	1078.6	7.4	1008.1	27.8	446.6	10.2	517.2	15.5	406.1	7.4	456	10.1	1019.62	44.9635	1057.37	42.1255
1059.09	46.495	1078.78	14.1287	1110.16	17.3739	1078.51	34.0418	1131.1	27.4	1018.9	16.4985	1445.07	12.4104	1387.15	15.7017	809.094	20.9631	431.8	5	437.354	9.07148	454.776	6.1474	914.9	11.1	457.4	1.9	1033.9	6.8	1070.5	13.8	1076.2	8.9	1079	12.1	1014.7	11.5	447.8	7	535.9	16.6	407	6.4	456.1	4.3	1030.54	57.9037	1059.09	46.495
1061.55	22.565	1085.02	12.0458	1113.22	17.4158	1080.84	18.3181	1143.3	24.2	1045.38	16.2179	1445.65	12.9186	1402.28	15.6826	940.088	15.876	445.2	5.5	442.303	9.63368	455.195	5.05966	989.1	16.1	459.6	5.6	1058.9	14.2	1074.3	10.9	1076.6	8.4	1082.2	9.1	1027.2	14.6	452.6	4.2	566	11.5	408.1	23.4	457.3	6.4	1044.94	36.5484	1061.55	22.565
1074.1	69.0482	1086.41	16.3591	1113.77	15.005	1085.03	20.3835	1154.5	22.1	1047.61	15.7101	1448.91	13.1372	1417.28	15.0218	993.841	20.5806	447.3	4	443.713	10.6478	463.239	6.64657	1076.7	7.2	547.9	3.3	1060.6	17	1094.4	15.1	1079.4	12.5	1111.3	17	1029.7	22.5	453.6	4.7	572.7	14.2	409.4	11.3	458.3	5.4	1055.46	33.4733	1074.1	69.0482
1082.67	25.3707	1089.15	15.2351	1116.01	19.4892	1092.08	21.5227	1170.3	12.3	1060.56	17.5591	1589.5	13.2107	1419.79	15.6597	994.283	24.9215	452	6.5	449.905	11.0825	465.702	5.46516	1088.3	13.9	666.4	23.6	1062.2	11.9	1098.9	15.4	1081.2	10.9	1111.7	13.5	1059.1	18.8	453.8	5.6	586	16.2	417.8	4.2	458.9	4.3	1061.68	41.3103	1082.67	25.3707
1089.07	28.3727	1096.05	16.5764	1120.09	18.4921	1095.19	17.9572	1176.2	5.6	1063.43	16.3126	1649.92	14.991	1420	14.6236	995.851	20.2721	454.7	4.7	456.668	11.5565	480.879	4.53555	1172.2	11.3	873.7	7.7	1085	11.5	1099.3	9.7	1085.9	12.6	1113.4	8.7	1030.8	14.2	457.6	5.3	611.2	13.3	419.2	5.2	458.9	5.3	1063.59	59.4705	1089.07	28.3727
1093.81	41.1063	1102.86	19.689	1123.05	17.6122	1109.01	15.2273	1196.3	19.1	1074	17.9231	1655.92	16.7274	1422.49	14.999	1001.18	25.5276	455.6	5	471.887	10.73	534.513	5.09016	1192.1	15.7	875	5.3	1106.2	9.5	1099.4	5.4	1088	10.2	1116.9	11.5	1064.6	6.1	461	4.9	612.6	8.6	419.3	6	459.5	8.2	1063.78	38.8587	1093.81	41.1063
1096.87	32.8865	1106.57	15.8457	1130.09	13.8669	1109.95	26.5254	1211.2	16.2	1074.38	16.358	1656.84	13.8692	1423.61	15.3439	1002.09	27.4209	459.2	4.85	477.518	12.5128	549.666	7.15004	1221.9	10.5	906.9	8.1	1115.8	10.3	1100	12	1089.9	8.9	1121.7	4.8	1083.6	17.6	461.5	5.2	625	10.4	422.9	7.4	461.3	4.7	1083.5	99.5496	1096.87	32.8865
1101.2	40.3986	1108.96	15.2647	1135.61	18.7358	1114.36	30.9813	1214	81	1078.98	14.7017	1663.69	12.4243	1423.87	15.4186	1005.13	26.4564	464.3	5	550.782	14.8587	608.566	7.96054	1240.6	8.1	945.2	7.4	1122.7	14.4	1102	17	1094.8	18.4	1136.8	14.3	1085.2	24.4	462.1	5.6	934.9	7.3	425.4	8.2	463.2	7.7	1087.09	59.8557	1101.2	40.3986
1110.47	36.1221	1116.85	11.316	1137.64	13.9245	1149.82	25.9127	1293.1	30.1	1085.84	18.6272	1665.64	12.4862	1425.37	13.81	1015.74	17.0474	473.2	5.5	570.183	29.7456	724.43	11.2083	1413.6	13.5	958.5	6	1126.3	6.3	1107	8.8	1102.9	6.2	1169.5	10.7	1094.5	14	468.1	4.6	938.5	27.9	432.3	7.7	464.4	8.1	1092.36	49.8666	1110.47	36.1221
1130.98	56.1859	1119.2	18.0132	1156.98	18.4334	1157.89	22.749	1328.5	15.4	1090.79	17.2334	1665.8	15.3183	1426.58	18.4054	1018.24	19.572	499.6	6	573.675	12.6853	728.061	10.3835	1389.1	9.6	988.8	11.3	1128.3	14.1	1113.3	34.8	1107.1	16.5	1175	13.4	1105	43.5	468.4	5.8	941.6	75.9	435.2	12.2	465.2	8.4	1100.9	67.0238	1130.98	56.1859
1160.94	49.4692	1121.28	17.452	1157.37	16.9698	1163.55	22.1851	1363.9	35.5	1150.74	14.0683	1666.14	13.4056	1428.12	16.5874	1022.72	19.0536	500	55	608.487	15.5553	931.592	28.8709	1498.1	8.7	989.5	10.2	1134.6	8.9	1122.7	14.9	1115.9	16.4	1268.1	5.7	1144.3	4.4	472.2	4.2	949.5	29.7	436.3	9.3	466.7	3	1133.69	53.9815	1160.94	49.4692
1168.74	29.7107	1127.46	22.0337	1157.55	14.293	1204.08	19.7882	1366.1	32	1158.49	18.7173	1667.24	13.5357	1428.89	13.1599	1023.22	26.7126	517.8	4.45	648.453	16.4666	954.057	21.2526	1494.7	33.2	1001.3	12.8	1134.9	8	1128	8	1119.8	17.4	1190.3	22.2	1130.6	14.4	478.6	6.8	969.7	49.9	436.6	6.3	467.3	8.7	1161.38	50.652	1168.74	29.7107
1180.62	58.5321	1131.91	15.4026	1163.88	15.702	1221.6	19.4174	1366.1	22.1	1158.85	14.459	1668.52	11.1961	1429.25	16.394	1025.2	27.3721	521	7.5	824.75	20.5462	960.939	17.3154	1470.7	10.2	1008.3	15.4	1135.6	12	1134.4	8.8	1128.7	10	1192.3	18.6	1175.6	15.3	480.8	9.1	990.9	74.3	437.1	10	467.3	9.8	1167.39	56.2423	1180.62	58.5321
1188.66	19.8193	1190.53	14.9709	1199.68	16.6686	1232.21	18.2938	1435.7	20.1	1170.48	29.239	1668.74	12.0916	1430.11	14.618	1028.38	22.3152	553	7.5	920.684	18.4801	967.201	22.5488	2564.3	1.7	1016.2	8.3	1139.2	8.3	1186.7	11.5	1135.9	12.7	1348.7	4.3	1214.1	52.1	485.3	8.9	993.6	14.9	438.4	7.7	468	7.6	1173.87	37.8766	1188.66	19.8193
1193.72	43.9658	1196.08	19.0954	1208	15.3194	1246.55	24.1587	1439.6	9.2	1172.35	18.5971	1670.6	11.0043	1430.74	16.7138	1029.13	18.6182	567	9.5	940.425	15.6207	980.411	22.2248			1031.2	6.5	1139.6	10.9	1192	9.7	1149.3	7.5	1322.5	24	1232.9	31.7	488.3	7.2	994.1	47.7	438.5	7.1	469.8	12	1181.8	35.6065	1193.72	43.9658
1196.12	36.5057	1196.77	16.1111	1208.68	15.6136	1316.03	19.9136	1440.1	16.2	1176.61	15.9577	1671.83	12.8021	1430.88	16.1687	1035.32	22.0032	593	7	970.285	23.5568	1000.97	19.4625			1037.3	9.8	1141.2	19.3	1194.3	8	1151.3	19.4	1514.2	29.9	1258.2	17.6	499.2	14.5	995.7	43	438.7	13.6	472.9	7.7	1197.34	32.5538	1196.12	36.5057
1227.3	58.0599	1197.82	14.4802	1210.74	15.5414	1317.39	23.3831	1441	17.2	1190.65	26.4382	1672.55	14.1752	1431.99	11.6782	1039.98	24.852	620	55	970.996	16.6554	1015.64	15.8423			1043.8	11	1147.7	14	1281.6	9.4	1152.2	13.6	1399.3	24	1312.8	14	609.3	5.3	1003	40.3	439.4	5.1	473.4	9	1251.07	53.059	1227.3	58.0599
1264.45	36.144	1215.79	20.166	1220.12	16.298	1321.1	20.905	1442.5	11.3	1226.02	17.5669	1673.85	12.6063	1433.17	14.0205	1049.45	23.7575	623.1	6	992.661	15.3652	1016.19	29.228			1044.1	11.2	1154.8	7.4	1545	16.2	1152.7	12.9	1367.9	8.4	1315	9.4	611.4	15.7	1011.2	9.5	440.7	5.8	474.2	9.6	1256.03	18.6659	1264.45	36.144
1291.73	50.7619	1218.62	17.7867	1223.19	13.1687	1321.76	18.2067	1445	13.9	1325.45	16.1008	1674.91	9.8664	1434.22	13.1437	1052.85	18.8204	625.8	6.5	1002.47	21.5071	1026.22	19.5099			1044.3	12.5	1155	11.7	1487	9.8	1155.3	9.4	1504.9	6.4	1510.8	4.2	685.4	11.5	1011.9	23.2	441.8	6.9	474.3	16	1259.35	25.8106	1291.73	50.7619
1296.62	48.2515	1218.92	14.662	1227.56	16.1863	1331.93	20.0971	1446.6	13.4	1353.98	13.5963	1676.15	12.9267	1434.28	15.6846	1053	15.2257	686	22	1038.17	18.9495	1043.07	18.1555			1046.3	25.2	1164.1	8.9	1427.8	8.3	1156.4	16.1	1422.9	8.1	1600.7	8.8	766.7	12.6	1011.9	99.7	441.9	8.9	474.6	4.9	1281.52	48.0518	1296.62	48.2515
1335.48	45.0668	1220.88	13.8291	1229.38	30.2766	1340.76	18.2619	1449.9	13.3	1360.98	15.4126	1677.59	15.2874	1434.85	14.1355	1054.32	20.2123	760	50	1042.36	21.1132	1061.61	31.6862			1067.1	10.2	1177.2	15.9	1420.8	6.9	1167.8	9.9	1626	16.7	1740.9	6.9	822.4	14.3	1014.1	58.2	442.4	8.4	475.5	9	1355.76	35.2912	1335.48	45.0668
1354.86	31.1255	1221.18	14.6998	1255.52	16.4827	1341.58	19.4863	1450.9	8.5	1365.29	15.0329	1678.12	14.8435	1435.72	18.166	1058.82	18.2096	877	21	1051.92	32.7049	1072.4	21.7195			1071.8	8.6	1178.2	17.4	1406.3	40.9	1175.4	9.5	1644.2	43.3	1778.3	7.6	924.3	49.5	1014.8	57.4	443.4	7.1	475.7	10.5	1402.44	31.6397	1354.86	31.1255
1362.75	25.4538	1233.11	14.917	1287.64	13.593	1361.35	21.403	1451	25.4	1401.95	22.1719	1680.07	11.1744	1436.82	14.6105	1060.78	16.8826	903	10.5	1053.73	19.1777	1073.28	23.1302			1075.2	9	1194.9	13.8	1447.1	56	1175.8	15.4	1816.9	6.4	1783.1	18.2	930	79.3	1019.5	15.2	443.8	5.9	478	8	1424.4	70.4753	1362.75	25.4538
1467.86	38.1781	1235.68	17.0388	1317.93	15.5672	1377.06	20.0004	1451.1	19	1434.11	16.5508	1681.05	12.6709	1437.87	12.1798	1061.19	24.4668	905	10	1060.56	29.2762	1073.45	25.9465			1077.6	5.2	1198.6	12	1728.9	3.6	1179.8	12.5	2879.8	6.2	1816.4	20.7	946.5	59.6	1021.7	13.3	444.1	8.1	478.8	13.3	1444.68	63.0872	1467.86	38.1781
1475.26	51.1638	1243.17	13.0116	1332.88	23.1086	1393.68	20.0236	1451.4	22.2	1436.02	16.8907	1681.32	13.5961	1437.88	10.5045	1062.1	17.4065	910	9.5	1062.24	19.681	1074.92	23.1366			1084	6.3	1201.2	12.4	1591.1	7.8	1180.6	18.1			1817.1	2.9	949.3	45.1	1022.7	41	444.8	10.8	480	7.1	1457.78	60.9493	1475.26	51.1638
1478.23	53.1137	1248.09	19.1169	1348.57	19.5112	1395.09	24.2693	1451.9	23.8	1438.72	13.7772	1682.21	12.4275	1440.4	14.6763	1062.49	23.2595	917	12.5	1066.14	20.8362	1076.51	23.394			1086.4	8.1	1219.4	12.1	1683.6	3.5	1196.2	11.2			2121.9	10.7	967.3	121.3	1025.9	81.4	446.3	6	482.7	15	1619.99	45.2444	1478.23	53.1137
1505.63	19.7459	1289.74	15.7637	1350.49	15.1708	1398.37	19.1736	1457.6	16	1450.04	13.3434	1684.32	8.91542	1441.84	15.8554	1063.49	29.1903	924	11	1071.09	19.5867	1076.71	16.3161			1089	8.9	1222.7	19.5	1748.9	8.2	1196.8	14.5			2689.9	8.2	969.1	30.6	1026.1	40.9	450.2	6.6	483.3	15.7	1639.64	45.6915	1505.63	19.7459
1506.61	42.9257	1305.84	15.2496	1371.88	14.1329	1411.54	15.8372	1468.6	26.2	1454.57	15.0522	1684.38	12.5562	1443.49	16.8755	1064.3	23.6124	927	15	1072.95	16.7706	1084.61	19.8245			1089.6	4.6	1222.8	11.2	1760.7	5	1202.2	14			2712	49.3	972.9	45.5	1026.9	22.5	450.3	7.5	501.8	10.3	1647.73	26.2239	1506.61	42.9257
1517.8	18.9094	1333.37	12.0866	1382.53	19.6776	1418.29	16.7491	1471.1	42.4	1505.55	16.5592	1685.12	11.2258	1443.53	16.4103	1070.4	27.7903	940	9	1073.82	18.7225	1087.87	17.0095			1096	13.3	1223.2	13.5	1606	11.5	1211.4	5.6			2753.5	8.7	974.3	16.1	1027.1	47.5	452.4	11.6	554.7	8.9	1653.85	35.4097	1517.8	18.9094
1527.7	45.2298	1355.75	17.4807	1390.1	17.0312	1418.97	18.8785	1489.1	72.7	1559.28	19.066	1685.19	13.0274	1443.86	12.2755	1071.46	21.7236	950	10	1077.49	21.9655	1090.69	21.0426			1096.1	8.2	1226.2	7.6	1620.8	7.9	1213.2	14.8					977.6	51.4	1027.8	41.2	453.5	6.4	556.3	10.2	1660.95	56.6872	1527.7	45.2298
1530.96	31.8563	1360.94	16.3051	1409.9	19.2251	1421.88	18.4858	1497.7	13.8	1594.08	15.3424	1685.84	11.2218	1444.81	17.5039	1074.1	26.4855	956	13	1082.14	18.7198	1097.43	23.834			1096.7	9.3	1235.5	9.9	1649.5	12	1214.4	6.7					983.1	33.6	1028.2	93.6	454.4	6.7	582.9	23.7	1664.01	45.3499	1530.96	31.8563
1543.63	19.4408	1370.18	15.4101	1412.55	18.2487	1427.84	21.5492	1508.2	9.1	1595.56	16.9542	1687.07	27.1929	1445.11	14.4213	1077.84	20.2272	968	10	1082.4	20.7546	1098.3	24.4781			1113.2	9.6	1237	8.9	1439.3	41.6	1214.6	8.3					987.5	43	1028.7	32.9	458.2	5.4	585.1	8.6	1664.46	42.2506	1543.63	19.4408
1582.84	19.3106	1380.38	15.4789	1415.02	15.6446	1437.24	19.3548	1519	109.4	1628.1	14.761	1687.54	12.0995	1446.06	12.6173	1078.43	20.8021	972	12.5	1088.5	17.1818	1104.91	26.1528			1113.3	7.3	1238.6	11.4	1725.2	4.4	1215.1	19.7					988.4	39.9	1028.8	10	458.4	6.9	601.2	11.9	1670.02	34.2415	1582.84	19.3106
1599.1	28.9528	1386.82	15.6594	1417.42	11.4478	1441.58	21.4373	1645	21.8	1648.05	17.5774	1688.07	15.3913	1446.66	18.9623	1079.48	18.8037	980	10.5	1089.3	22.1691	1105.66	24.3185			1115.8	10.1	1244.3	10.4	1725.7	6	1217.7	4.9					998.5	57.7	1030.8	185.3	459.3	6	608.5	8	1671.02	21.6034	1599.1	28.9528
1618.67	35.3813	1388.06	16.0692	1419.96	13.0119	1445.59	17.4299	1696.6	10	1654.01	14.0108	1688.24	12.8697	1447.34	12.7633	1081.27	20.8494	981	9.5	1105.75	24.5563	1115.46	19.6829			1129.2	11.1	1249.5	16	1862.8	21.5	1264.4	3.2					999.5	103.8	1031.2	26.5	461.6	12.4	615.1	5.5	1671.84	46.6605	1618.67	35.3813
1621.79	18.6897	1393.59	15.16	1420.18	15.2678	1449.36	20.9081	1698.6	16.1	1655.47	18.017	1688.56	10.8883	1447.89	14.4693	1084.06	27.2071	985	11	1118.05	20.6654	1116.3	24.0951			1150.7	19.9	1265.8	12.5	1823.8	7	1250.8	14.4					1008.1	11.1	1031.6	30.4	462.9	8.9	625.8	14.5	1672.61	37.5399	1621.79	18.6897
1626.9	40.5949	1396.05	11.2261	1420.41	15.5842	1450.89	20.1618	1699.9	19.5	1656.94	14.4489	1689.81	14.0123	1449.74	15.9447	1090.34	20.931	986	10.5	1118.22	24.6873	1120.86	15.4444			1152.4	8.9	1267.3	31.6	1690.9	18	1228	10.2					1010.4	37	1031.9	21.9	463.5	6.4	627.9	27	1680.36	46.5113	1626.9	40.5949
1628.26	28.6345	1402.39	14.3512	1420.58	15.6241	1451.86	18.4222	1701.1	12.7	1665.58	13.9045	1690.65	14.5473	1451.24	16.6522	1098.89	17.4808	990	11.5	1121.03	21.2973	1130.25	26.3934			1155.5	17.6	1349.3	4.8	1837.2	2.5	1350.5	38.1					1011.7	23.1	1032.7	17.1	464	5.8	641.4	11.3	1681.53	51.2106	1628.26	28.6345
1628.51	25.7208	1403.26	13.3397	1422.78	13.6737	1455.08	18.4846	1704.8	17.8	1669.27	13.9789	1691.14	11.4971	1451.55	17.7686	1133.52	19.8174	990	14	1124.03	18.9238	1131	17.9428			1163	10.7	1440	6.2	1825	6.6	1382.6	17					1012	25.6	1033.1	15.1	465.4	7.7	643.6	24	1684.64	62.6266	1628.51	25.7208
1634.44	36.2363	1409.91	28.3765	1423.54	17.8463	1457.04	14.7365	1705.6	16.1	1669.88	15.1833	1691.4	12.6704	1456.12	15.738	1133.83	17.23	991	11	1125.78	18.5652	1139.51	19.8282			1168.2	27.5	1364.7	10.3	2134.1	10.1	1445.6	8.6					1012.4	38	1033.3	18.9	468.2	8.9	657.6	10.2	1689.25	55.3002	1634.44	36.2363
1641.72	27.6842	1410.06	15.6148	1423.59	14.6989	1467.16	22.8934	1705.8	11.1	1671.61	15.162	1691.78	14.3297	1457.2	12.9888	1156.65	16.4783	991	14	1135.64	13.1594	1141.5	25.8702			1189.3	13.9	1233.9	8.44	2694.8	5.6	1488.1	7.1					1012.4	18.8	1036.6	17.6	470.1	15.8	710.6	14.5	1690.6	37.7235	1641.72	27.6842
1641.72	20.1439	1412.57	11.8692	1427.17	19.3138	1474.46	22.3747	1706.8	12.3	1674.8	14.1836	1691.94	10.2397	1457.83	14.2211	1156.67	18.734	992	9	1138.88	16.3543	1142.13	18.5386			1192.7	15.5	1344.7	5.6	2652.6	1.6	1714	8.5					1014.2	71.2	1036.6	11.4	477.6	8.3	894.9	11.6	1693.53	42.6475	1641.72	20.1439
1650.96	56.3834	1417.2	10.8565	1428.99	15.9649	1480.84	22.2622	1707.1	26.9	1675.47	15.1625	1692.9	14.2157	1459.53	17.7612	1166.61	17.7276	996	9	1141.03	21.8944	1148.13	22.0259			1205.2	12.5	1321.7	6.11	2923.5	3.2	1750.9	3.6					1015.2	15.5	1036.8	35.1	487	6.6	921.7	11.4	1702.34	18.7464	1650.96	56.3834
1662.32	29.8697	1420.07	11.6876	1431.61	12.2104	1482.9	20.1793	1707.2	14	1675.56	12.2492	1693.08	14.7939	1460.07	18.9618	1172.2	18.5223	1001	10.5	1145.52	18.8306	1152.32	22.1044			1210.1	10	1438.7	27.7	2736	6	1679.5	29.1					1017	21.4	1036.9	18.1	491.8	11.3	937	16.2	1706.12	32.5992	1662.32	29.8697
1662.89	55.9111	1421.22	11.7559	1431.8	15.9344	1502.65	17.2757	1708	17.9	1677.17	11.321	1693.24	12.0893	1468.58	15.5662	1180.22	15.495	1007	10	1147.48	21.307	1156.3	21.8688			1219	10.5	1440.5	12.8	2780.5	5.8	1676.6	24.1					1018.8	84.5	1037.7	36.3	538.3	8.9	940.1	18.4	1718.27	20.4334	1662.89	55.9111
1663.55	27.6109	1422.02	15.2103	1435.33	16.5959	1535.57	22.9767	1709.5	22.9	1679.69	11.9549	1693.41	13.5867	1505.74	13.4205	1183.58	18.3215	1009	13.5	1152.14	16.1683	1158.02	19.3917			1219.1	17	1321.9	22	2729.8	1.5	1720.6	11					1021.6	24.1	1037.9	12.4	579.8	9.5	940.7	16.7	1721.22	60.4727	1663.55	27.6109
1663.65	47.0277	1425.18	12.1842	1435.44	16.7948	1544.28	21.5443	1709.9	13.7	1681.96	14.4717	1693.95	14.295	1637.38	15.213	1195.52	18.9526	1010	9.5	1161.24	16.8153	1159.21	19.9627			1222.8	10	1429.4	6.57			2369.2	4.8					1022	43.6	1039	53	608.8	8.9	950.4	10.6	1733.74	44.7671	1663.65	47.0277
1665.63	35.7702	1425.89	14.093	1438.38	15.0743	1668.69	20.9522	1710.6	13.9	1682.59	14.707	1695.09	11.942	1659.29	13.529	1203.12	22.1693	1011	11	1164.84	18.3376	1164.73	21.3219			1235.2	11.3	1488.4	12.7			1828	9					1023	46.9	1039.1	11.4	615	6.6	952.6	11.4	1736.9	29.3347	1665.63	35.7702
1666.64	53.8491	1430.08	16.6467	1439.14	15.4491	1669.63	18.2412	1710.9	24.3	1684.82	13.8729	1695.21	12.9998	1666.5	13.9698	1279.08	21.2377	1020	11	1166.92	19.9892	1169.86	31.6337			1239.2	9.1	2112.2	1.62			1843.9	4.6					1024.3	33.9	1039.3	15	618.4	8.6	963.7	14.3	1743.31	38.4875	1666.64	53.8491
1667.3	53.8455	1440.32	13.5906	1439.3	18.6717	1673.22	17.1358	1711.4	16.2	1686.94	17.3898	1695.23	14.4219	1669.44	14.2697	1281.86	17.6297	1021	12	1181.77	16.8864	1170.49	35.2239			1245.6	14					1847.5	5.1					1025.4	40.4	1039.3	19.3	621.4	12.6	965.2	15.1	1743.35	41.981	1667.3	53.8455
1668.32	40.3402	1444.29	14.8768	1442.16	14.0172	1690.13	22.0257	1712.8	12.7	1687.59	11.7415	1696.49	11.5208	1669.56	14.7049	1290.69	18.7091	1024	12	1183.31	18.0745	1181.94	38.5112			1252.1	16					1827.5	4.5					1030.2	69.5	1041.1	33.1	633.2	9	970.9	22.8	1756.7	32.0228	1668.32	40.3402
1669.46	26.5105	1447.73	13.3418	1442.86	15.624	1694.55	20.6924	1712.9	15.7	1688.54	15.3205	1697.4	11.9306	1670.13	14.3502	1300.65	14.7535	1025	9	1184.72	20.6219	1218.17	22.9824			1269.5	15.1					2558.1	2.6					1032.2	35.3	1042.2	12.9	648.6	9.6	973.1	17.3	1759.61	97.3007	1669.46	26.5105
1683.33	22.956	1448.2	12.7712	1443.73	16.4199	1696.58	15.6241	1713	12.5	1690.35	13.1374	1698.48	12.6427	1673.97	15.7376	1315.55	18.7372	1027	8	1203.92	21.2819	1221.88	25.0923			1303.3	14.8					2812.9	8.1					1033.2	30.9	1045.4	36	664	25.6	980.1	17.2	1781.1	53.2736	1683.33	22.956
1688.13	40.9758	1457.43	12.8511	1446.01	19.04	1697.24	16.1304	1713.1	11.3	1691.13	15.8799	1699.38	15.0337	1675.33	14.4977	1340.92	20.9697	1031	15	1204.33	16.3512	1222.57	20.4894			1344.9	25.2					2762.9	4.4					1033.5	9.4	1046.7	9.9	682.5	16	992	12.3	1781.23	33.9288	1688.13	40.9758
1693.66	20.2316	1458.21	14.4689	1447.21	21.4229	1700.37	20.2933	1713.6	14	1692.37	15.7501	1699.48	14.8944	1682.64	15.5729	1353.19	21.4752	1032	12.5	1204.76	28.4172	1227.63	16.7558			1328.1	30.8					2808.3	2.2					1034.5	30.6	1048	96.3	777.4	15.4	992.2	63.1	1781.65	59.6796	1693.66	20.2316
1697.95	28.3865	1461.87	10.9616	1452.18	21.1839	1700.66	17.4718	1714.4	8.2	1695.96	14.5125	1699.8	14.1835	1687.78	14.5502	1365.53	20.1858	1035	10	1221.04	19.6811	1233.51	16.192			1368.7	22.1					2815.2	4.7					1035.9	12.3	1048.2	37.4	894.6	22.9	996.4	20.3	1787.9	17.8729	1697.95	28.3865
1710.73	48.21	1470.29	15.2083	1459.03	15.1914	1701.5	16.3471	1714.5	18.4	1696.38	13.2983	1699.87	10.9864	1688.55	13.7912	1379.81	16.0512	1035	10.5	1224.55	15.8423	1236.95	16.2209			1649.5	12.1											1036.7	11.8	1049	12	917.6	40.2	1003.1	11.1	1799.59	42.1209	1710.73	48.21
1711.89	44.5279	1482.32	13.7464	1460.13	12.6012	1704.3	21.9352	1715.2	6	1704.01	13.9898	1701.89	15.0351	1688.85	14.9321	1380.05	16.7622	1036	10	1241.05	19.8872	1242.16	15.0988			1489.4	11.3											1037.6	108.4	1050.3	29.9	931.4	30.5	1003.1	12.2	1811.49	39.1547	1711.89	44.5279
1736.67	30.8118	1495.82	10.9212	1492.86	11.9842	1704.38	15.3427	1717.1	10.8	1707.01	14.364	1701.91	13.0467	1691.63	12.4713	1380.12	15.8519	1040	10.5	1253.51	14.8053	1248.71	28.4626			1579.1	8											1038.1	37.1	1054.1	36.8	941.9	33.6	1004.4	10.2	1820.72	35.7884	1736.67	30.8118
1742.81	50.3999	1577.69	34.4538	1496.71	14.5864	1705.33	17.7502	1717.4	15.4	1713.08	12.4532	1703.22	16.6878	1699.69	21.0698	1401.57	15.9803	1044.7	8.5	1264.52	32.9524	1250.22	18.9302			1830.5	12.9											1039.9	20.6	1056.8	64.4	972.5	45.4	1005.4	10.3	1868.68	60.6367	1742.81	50.3999
1755.52	41.7316	1583.93	18.8752	1625.33	17.4569	1706.63	19.7067	1718	14.9	1717.02	16.2813	1703.92	14.4835	1699.93	15.4201	1408.06	27.6817	1048	10	1284.73	17.4546	1250.94	16.682			1953.2	6.1											1040.5	17.7	1057.6	26.8	972.6	25.8	1005.6	13.7	1886.11	98.9344	1755.52	41.7316
1768.93	25.2286	1614.11	13.8292	1626.22	13.3764	1708.64	16.9016	1718	17.7	1727.36	16.1309	1703.94	14.8043	1700.91	12.8925	1433.37	22.9005	1050	24.5	1285.59	18.2331	1259.19	25.9495			2053.7	2.6											1040.6	31.4	1058.5	4.9	977	48.9	1006.5	13	1914.22	33.5517	1768.93	25.2286
1771.37	48.5735	1620.6	16.05	1679.38	16.2317	1711.96	17.9679	1718.1	11.1	1728.84	16.1905	1705.01	11.9232	1703.35	13.4795	1434.84	13.5857	1065	15	1313.69	16.9003	1260.15	23.5158			1988.7	5.2											1041	35.7	1059.4	19.1	977.8	31.9	1007	13.1	1921.55	102.263	1771.37	48.5735
1788.2	40.9889	1626.46	14.6133	1685.43	20.9331	1713.41	14.2317	1718.3	21.5	1728.89	13.2443	1705.68	14.6678	1703.53	16.8372	1439.65	17.7614	1069	11	1335.59	15.1196	1269.13	23.4404			2261.8	29.5											1042.3	59.5	1059.9	29	978.5	49.4	1007.2	19	1993.93	22.233	1788.2	40.9889
1796.41	21.0069	1674.03	18.1231	1690.47	13.3653	1714.82	18.9229	1718.5	21.1	1735.54	12.3323	1706.04	15.2444	1703.87	17.3488	1443.35	24.3896	1081	11.5	1343.07	16.3853	1272.06	17.3765			2627.7	4.8											1042.7	22.9	1060.8	145.4	979	32.6	1011.4	19.5	2003.99	32.3673	1796.41	21.0069
1797.54	18.2282	1685.14	12.6234	1690.66	13.8146	1716.5	19.1757	1719	16	1742.41	14.0338	1706.04	14.363	1704.76	13.2526	1463.94	18.3927	1083	11.5	1346.07	17.0839	1273.12	17.4144															1044.1	18.2	1064	167.2	980.6	24.9	1012.7	15.8	2056.11	36.1377	1797.54	18.2282
1800.39	41.5298	1694.08	15.5688	1693.1	16.4016	1717.05	17.7184	1719.1	15	1746.98	15.7898	1706.09	13.2722	1705.49	15.2293	1464.53	18.9221	1083	11	1364.98	13.2074	1275.8	18.6228															1049.3	19.8	1064.6	5.8	986.9	35.1	1014.4	15.8	2440.27	23.5474	1800.39	41.5298
1807.32	34.1993	1695.24	14.8844	1696.41	12.9407	1718.47	21.3396	1719.3	9.7	1797.62	12.868	1706.09	13.0664	1709.27	14.6569	1472.26	19.8124	1090	10	1375.86	21.4414	1302.29	24.4615															1049.4	38.7	1065.4	8.3	990.3	42.2	1015.9	19.8	2560.58	71.3582	1807.32	34.1993
1808.36	19.2669	1697.33	15.4861	1699.02	15.282	1719.03	19.6571	1720	11.6	1799.13	13.6816	1706.82	10.969	1710.05	16.4224	1482.56	20.1959	1098	5.5	1375.87	20.8715	1312.52	24.1915															1051.1	36	1065.4	139.8	990.7	35.9	1016.1	12.7	2613.04	60.8043	1808.36	19.2669
1813.22	24.3471	1703.36	14.3604	1711.81	15.1969	1721.44	14.5515	1721.2	12.6	1810.24	13.5221	1707.59	11.5773	1711.33	15.531	1495.1	19.1395	1109	11	1383.83	16.9294	1322.31	19.3677															1053.9	26.6	1068	49.3	991.4	39.7	1017	12.7	2701.04	18.5343	1813.22	24.3471
1829.11	49.146	1710.6	14.3677	1711.87	33.3523	1721.87	16.8535	1721.9	17.1	1810.26	15.351	1709.39	14.4601	1714.67	16.5926	1498.32	14.8562	1114	11	1390.12	19.5178	1325.38	19.4355															1061.8	13.7	1068.8	56.5	996.9	39.3	1017.3	18.1	2724.11	30.9757	1829.11	49.146
1892.27	18.3755	1729.95	15.2461	1715.3	14.4802	1725.83	17.3985	1723.6	24	1814.34	13.1137	1709.99	10.3852	1717.73	14.3804	1507.4	14.8671	1133	11	1392.6	14.3048	1325.5	19.3237															1062.4	9.5	1070	20.3	997	29	1018.4	18.5	2724.68	19.3083	1892.27	18.3755
1970.66	46.0204	1730.55	11.9921	1728.65	13.2697	1726.6	17.189	1724.5	20.8	1832.84	14.435	1712.6	13.896	1717.99	13.3913	1525.45	16.8671	1135	9.5	1397.66	17.7896	1326.27	16.8215															1063.7	11.3	1070.4	7	1000.1	34.5	1018.9	11.2	2756.5	21.9677	1970.66	46.0204
2316.14	38.2658	1735.26	10.7844	1729.25	13.417	1727.08	15.6142	1748.1	44.8	1840.16	12.9984	1713.27	15.4128	1723.99	16.0268	1563.56	20.4447	1139	10	1408.28	15.4714	1328.43	16.4629															1064.2	37.2	1070.4	14.2	1000.2	34.3	1019.1	17.2	2759.33	10.698	2316.14	38.2658
2600.22	34.0079	1737.18	14.4067	1733.97	15.68	1738.88	19.042	1749.1	11.6	1842.33	13.6768	1713.95	18.5317	1725.91	15.381	1568.37	15.7964	1141	9.5	1412.93	18.9782	1331.56	22.1754															1065.1	12.5	1070.4	23	1002.3	34	1022.3	18.1	2773.37	42.3201	2600.22	34.0079
2620.68	38.3813	1744.88	11.8295	1739.71	33.0744	1748.29	21.0023	1854.4	14.8	1846.09	18.5074	1716.81	16.0955	1727.97	15.8506	1601.32	17.3831	1142	12	1416.89	15.4312	1331.9	17.8753															1066.7	188.6	1070.6	14.8	1002.5	18.7	1031	18	2787.15	23.9189	2620.68	38.3813
2630.6	26.7587	1748.05	11.8517	1769.23	12.6859	1754.44	22.0174	1858.7	29.3	1868.78	14.7342	1717.23	12.7032	1728.71	13.9813	1602.43	22.6714	1147	8.5	1418.61	22.5341	1334.36	17.6376															1067.3	15.5	1071.5	25.4	1004.8	54.5	1031.4	21.8	2796.94	31.7502	2630.6	26.7587
2684.88	16.5795	1757.09	11.2869	1769.35	13.4716	1760.93	16.6915	1885.4	33.6	1925.29	15.8863	1717.23	12.1424	1730.05	13.2642	1621.1	18.7367	1148	12.5	1425.53	16.1973	1351.01	24.5285															1067.7	13.5	1071.7	21.2	1005.4	51.3	1031.9	13.2	2814.51	33.3344	2684.88	16.5795
2715.88	32.8235	1770.73	11.9807	1772.22	12.1959	1769.71	19.6191	1926.1	11.7	2086.65	16.107	1719.55	12.3474	1732.26	15.6529	1621.42	15.2178	1149	12	1426.19	14.4858	1353.27	14.505															1068.1	14.2	1072.1	7.7	1007.6	30.8	1034.9	18.5	2817.55	33.6533	2715.88	32.8235
2722.74	23.0676	1773.97	14.4003	1806.97	14.7157	1775.37	18.5151	2524.8	8.5	2505.43	11.1448	1725.58	13.5397	1733.25	16.6249	1638.78	18.2759	1155	10	1426.54	17.7409	1359.37	18.0102															1068.4	18.4	1073.6	20	1010.1	16.3	1036.2	18.9	2894.12	25.6316	2722.74	23.0676
2736.57	27.8164	1776.27	12.3068	1836.36	15.7931	1778.02	23.2522	2642.9	11.9	2553.64	13.7253	1730.55	13.3464	1733.62	18.1126	1652.06	21.6842	1167	12	1428.42	31.4471	1380.61	17.0404															1068.9	52.2	1073.7	12.7	1011.7	57.6	1051.1	17.2	2906.42	31.3271	2736.57	27.8164
2745.25	44.5635	1776.28	14.0194	1838.27	11.3275	1814.84	20.9949	2674.5	10.3	2711.95	14.2625	1730.86	11.7628	1734.88	15.429	1858.67	17.1411	1185	9.5	1436.32	18.383	1380.73	18.0674															1069.5	27.8	1074.6	23.9	1012.5	35.4	1054.7	15			2745.25	44.5635
2754.42	32.0429	1786.24	13.9433	1862.19	13.4113	1814.85	21.6452			2716.15	13.5035	1737.27	13.2296	1736.35	13.0138	1919.53	17.3165	1194	14	1437.73	19.7697	1386.57	16.0065															1071.7	18.4	1075.1	7.9	1013	48	1056.5	18			2754.42	32.0429
2764.38	30.5314	1807.92	11.0693	1884.99	13.4262	1815.9	16.2308			2718.97	13.148	1821.32	10.9551	1737.45	13.8834	1948.44	14.1971	1195	15	1441.89	28.9976	1388.13	18.553															1072	23.9	1076	80.5	1013.7	20.5	1056.8	17			2764.38	30.5314
2804.09	21.5947	1808.35	48.7571			1858.13	20.2429			2784.33	12.1413	1823.99	14.5975	1743.25	18.8174	2002.48	15.6983	1215	11	1456.94	16.4237	1396.7	11.8586															1075.4	23.2	1077	16.2	1013.7	23.2	1070.1	14.7			2804.09	21.5947
2880.96	37.5191	1809.74	11.9656			1862.97	15.6445			2790.98	12.0681	1824.66	14.204	1745.32	17.9599	2034.25	23.9503	1218	13	1457.32	16.2622	1403.8	17.7279															1075.6	4.7	1080.1	41	1014.3	55.3	1079.5	12.6			2880.96	37.5191
2933.71	35.4113	1849.47	14.9417			1871.49	24.4945			2798.04	13.711	1845.98	38.2281	1764.45	16.3273	2105.9	15.9821	1226	13.5	1460.94	18.7266	1409.16	16.301															1076.7	7.3	1082.1	25.4	1014.7	33.7	1098.8	19.6			2933.71	35.4113
3000.59	40.6892	1850.38	15.1921			2385.23	17.1511			2806.73	14.3842	1850.9	12.2594	1836.87	15.2641	2468.44	20.1362	1228	13.5	1470.71	20.0324	1412.64	20.6037															1077.2	32.6	1082.7	31.1	1016.6	55.9	1099.3	20.5			3000.59	40.6892
392.666	12.2284	1870.69	12.2247							2830.37	11.5494	1858.63	10.4695	3092.81	12.0575	2577.41	16.0747	1247	13.5	1473.61	46.7723	1424.67	18.7783															1080.7	14.6	1086.1	20.3	1020.2	30.3	1105.4	10.6
409.955	7.74525	1886.49	13.5802							2967.85	9.95441	1880.93	12.5112			2717.61	13.1383	1250	14	1474.56	19.0758	1427.86	45.2363															1080.9	5.1	1086.2	4.4	1020.6	34.3	1108.4	29.4
415.999	20.0625	2624.06	15.7444									2284.18	9.73601			2719.29	15.9848	1252	12.5	1477.2	19.0629	1445.9	21.1997															1082.3	16.7	1092	23.4	1022.3	59	1110.5	33.3
423.572	2.62372	2651.34	9.89022									2682.54	10.5004			2917.39	16.6611	1253	15.5	1478.37	17.3118	1446.21	17.7475															1082.4	38.8	1094.8	13.4	1023.2	19.6	1112.4	41.9
442.4	10.2615	2654.98	12.4555									2691.38	11.2137					1261	11	1482.8	21.6634	1446.53	17.5751															1083.7	16.3	1097	43.6	1025.3	35.1	1120.9	17.3
446.835	7.98665											2693.51	9.93842					1277	17.5	1483.42	16.0333	1450.2	20.9256															1084.9	85	1099.6	11.3	1025.4	72.5	1121.9	12.2
451.662	6.06322																	1373	29	1483.51	17.9357	1454.85	14.0619															1088.6	50	1100.7	31.3	1026	13	1137.3	14.2
465.478	5.83791																	1404	24.5	1484.93	14.1996	1459.37	22.9817															1088.9	36.6	1104.4	19.5	1026.1	40.1	1146.1	13.7
608.073	6.4991																	1423	24.5	1486.48	14.9069	1461.14	18.2573															1089	51.7	1105.7	12.5	1026.4	23.2	1155.5	18.6
618.108	11.847																	1455	24	1493.18	17.585	1461.27	15.3489															1090.8	44.6	1106.4	26.1	1026.6	31.7	1159.5	17.6
1011.59	27.5842																	1456	26.5	1494.29	15.755	1466.18	21.1074															1091.2	60.5	1113.6	74.6	1026.7	17.5	1166.5	16.5
1019.62	44.9635																	1468	25	1496.23	25.1697	1472.4	22.416															1091.7	72.7	1115.3	67.5	1027.7	22	1170.5	14.2
1030.54	57.9037																	1496	25.5	1498.02	18.5481	1483.81	17.5035															1092.3	68.1	1116.2	25.2	1029.7	51.6	1172.4	16.8
1044.94	36.5484																	1536	38.5	1498.14	18.1867	1484.74	17.5705															1094.8	36.9	1119.4	21.3	1029.9	21.6	1173.5	12.9
1055.46	33.4733																	1597	41.5	1498.66	19.8677	1485.55	22.5659															1096	27.2	1120.4	20.5	1030.6	34.4	1175.6	15
1061.68	41.3103																	1625	24	1498.68	18.5175	1488.79	15.4794															1096.2	9.5	1121.5	4.3	1030.8	15.7	1181.2	13.1
1063.59	59.4705																	1637	24	1498.94	16.3363	1491.86	18.5848															1099.3	6	1122.9	21.2	1031.6	53.3	1181.4	10.6
1063.78	38.8587																	1663	24.5	1499.8	16.8269	1493.59	19.2567															1102.1	39	1124.8	87.9	1031.8	32.7	1182.1	12.9
1083.5	99.5496																	1715	24	1501.28	12.7169	1493.66	18.606															1106	101.1	1127.7	44.4	1032.5	47.2	1184.1	21.9
1087.09	59.8557																	1719	24	1501.96	14.1198	1494.26	18.8114															1107.2	56.8	1129	41.4	1034	27.4	1184.7	12.6
1092.36	49.8666																	1760	33	1501.96	19.5908	1504.67	23.7549															1107.6	51.1	1129.8	106.7	1035.2	25.9	1189.2	17.8
1100.9	67.0238																	1764	23.5	1503.69	21.3058	1510.89	21.4148															1109.7	53.6	1135.9	44.8	1035.2	26.2	1190.1	17.6
1133.69	53.9815																	1792	19.5	1505.15	25.0525	1512.02	31.3307															1112.9	26	1138	14.2	1036.1	33.4	1210.4	12.4
1161.38	50.652																	1799	23	1505.6	16.1744	1515.62	12.8026															1113.5	31.8	1138.7	53.5	1036.3	25.6	1212.6	12.6
1167.39	56.2423																	1946	24.5	1508.35	16.8027	1515.8	23.1294															1113.6	23.4	1138.8	13.8	1037.6	44.5	1219.2	16.4
1173.87	37.8766																	2031	34.5	1508.4	22.1315	1516.69	17.2534															1115.6	9	1144.2	19.5	1039	25.9	1220.8	17.2
1181.8	35.6065																	2469	25.5	1512.97	14.1806	1518.39	22.8536															1115.7	48.9	1147.4	10.5	1039.5	19.7	1226.7	13.2
1197.34	32.5538																	2520	21.5	1523.18	17.4617	1521.64	18.2433															1117.7	23.6	1147.6	24.7	1040.2	17.8	1227.3	12.5
1251.07	53.059																	2820	28.5	1536.77	14.6048	1521.78	25.8126															1122.8	38.9	1149	6.6	1041.2	29.7	1227.7	17.1
1256.03	18.6659																			1537.61	16.526	1522.33	17.033															1126.4	26	1149.6	17.4	1043.3	26.9	1231	17.5
1259.35	25.8106																			1537.67	18.5622	1525.15	19.7753															1126.5	44.6	1150.2	20.4	1044.6	46	1231.8	10.3
1281.52	48.0518																			1543.95	17.7288	1535.5	22.441															1127.6	124.3	1150.9	21.2	1045.4	22.2	1232.6	15.9
1355.76	35.2912																			1544.13	17.117	1537.19	19.5955															1129.1	151.7	1151	50.6	1045.6	63.1	1233.6	10.5
1402.44	31.6397																			1559.84	19.1238	1543.81	17.0623															1129.9	15.9	1151.7	33.5	1045.8	32.5	1234.7	12.5
1424.4	70.4753																			1580.41	14.758	1560.08	21.1499															1130.4	24.7	1153.5	20.9	1046.7	26.2	1255.1	17.9
1444.68	63.0872																			1588.49	16.4924	1575.25	24.1512															1130.5	10.2	1153.9	48.3	1046.8	34.8	1268.1	25.7
1457.78	60.9493																			1591.06	15.6369	1579.09	21.515															1134	69	1154.1	7.8	1047.1	62.4	1268.6	14.4
1619.99	45.2444																			1591.15	14.334	1582.51	17.7067															1134.1	7.4	1154.5	46.4	1047.3	41.7	1275.5	17.2
1639.64	45.6915																			1594.35	18.5321	1585.05	17.122															1134.6	36.4	1155.3	17.3	1048.3	26.7	1278.9	12.5
1647.73	26.2239																			1594.89	21.7834	1586.15	18.1468															1135.9	67.1	1155.9	29.6	1050.7	28.4	1292.9	49.5
1653.85	35.4097																			1599.96	18.7229	1599.16	16.3194															1138.4	40.2	1157.8	93	1051.9	17.7	1305.7	11.1
1660.95	56.6872																			1601.49	21.8366	1602.52	18.6469															1140.1	17.5	1160.3	41	1052.1	37.7	1309.4	12.7
1664.01	45.3499																			1602.23	16.3367	1609.56	18.6978															1140.2	62.3	1161.5	13.1	1060.1	40	1320.4	56.2
1664.46	42.2506																			1602.69	18.7761	1609.74	17.4644															1141.6	71.5	1163.4	7.7	1060.6	38.3	1322.1	9.8
1670.02	34.2415																			1606.63	28.9142	1610.51	14.5152															1143.1	6.8	1166.5	28.2	1060.7	41.3	1322.1	9.9
1671.02	21.6034																			1607.27	17.4167	1611.13	15.905															1146.6	16	1167.2	107.3	1061.2	30.8	1327.9	16.1
1671.84	46.6605																			1607.54	20.8001	1617.7	25.8173															1147.2	15.8	1167.4	13.3	1062.3	37.3	1332.5	13.5
1672.61	37.5399																			1607.86	17.5011	1622.05	16.1775															1149.5	24.6	1167.5	38.2	1063.9	24.3	1332.9	12.2
1680.36	46.5113																			1608.52	17.6995	1624.42	18.9644															1151.1	13.7	1167.9	12.1	1071.2	38.5	1336.8	10.8
1681.53	51.2106																			1611.11	19.0614	1625.72	15.5339															1159.8	20.9	1169.1	16.7	1073.7	41.3	1339.2	10.4
1684.64	62.6266																			1612.83	18.7846	1627.75	16.7318															1160.6	20.5	1169.4	9.2	1074.2	20.8	1376.9	15.1
1689.25	55.3002																			1614.01	15.0628	1628.24	15.8774															1161.4	34.9	1169.4	10.2	1077.5	44.4	1385.4	15.4
1690.6	37.7235																			1614.36	21.7911	1628.26	17.4263															1162.2	11.1	1169.8	106.7	1079.3	25.8	1401.2	15.1
1693.53	42.6475																			1614.85	20.5221	1630.09	18.0666															1166.3	59.9	1172.3	23.6	1079.8	34.5	1415.8	30.4
1702.34	18.7464																			1616.15	15.5155	1632.88	18.4951															1173.9	9	1172.7	19.9	1081.2	24.7	1419.2	15.1
1706.12	32.5992																			1618.11	17.1669	1633	23.9238															1174.9	14.3	1173.4	23	1083.2	51.9	1425.9	13.8
1718.27	20.4334																			1618.78	21.0964	1633.32	18.4757															1175.7	7.3	1173.5	24.9	1085	34.4	1459.4	11.1
1721.22	60.4727																			1619.44	20.647	1633.57	16.8704															1176.3	6.9	1175.3	175.9	1085.7	32.2	1476.3	10.6
1733.74	44.7671																			1623.6	20.8194	1635.76	18.457															1176.5	13.4	1175.3	5.8	1085.8	20.6	1481.6	10.5
1736.9	29.3347																			1624.44	14.9056	1636.96	17.026															1178.1	10	1178.2	48.5	1087.3	25.7	1503	13.1
1743.31	38.4875																			1625.4	19.5677	1639.02	18.4398															1182	27	1178.6	56.8	1088	35.6	1518.5	18.4
1743.35	41.981																			1625.57	19.8881	1639.3	16.8826															1189.1	67.8	1178.7	62.2	1091.1	34	1540.3	9.5
1756.7	32.0228																			1626.24	19.6227	1640.71	19.802															1189.4	7.8	1179.6	8.2	1091.7	35.6	1549.1	16.8
1759.61	97.3007																			1626.43	19.5991	1641.81	16.2294															1190.6	143.3	1180.1	21.1	1093.3	25.7	1553.8	10.2
1781.1	53.2736																			1627.52	16.1759	1643.79	15.424															1191.3	15.4	1181.4	17.5	1094	22.7	1554.4	10.8
1781.23	33.9288																			1630.31	18.3163	1644.72	17.5802															1211.4	58.8	1182.3	38.3	1094.1	18.3	1596.4	12
1781.65	59.6796																			1631.16	14.4671	1645.79	17.5184															1227.4	67.5	1185.9	17.9	1094.2	22.7	1605.1	11.8
1787.9	17.8729																			1636.76	17.2941	1646.13	16.8576															1237	11.5	1186.4	19.5	1095.4	45.1	1620.6	12
1799.59	42.1209																			1636.8	21.8313	1648.07	16.1821															1240.6	75.8	1186.6	30	1096	29.8	1640.3	43.1
1811.49	39.1547																			1637.64	18.0692	1648.08	16.6327															1249	6.7	1188.8	69.9	1096.2	39.9	1654.8	11.6
1820.72	35.7884																			1638.63	17.1917	1649.87	18.5097															1250	149.2	1191.2	17.1	1096.5	18.6	1693.9	9.8
1868.68	60.6367																			1638.79	17.0238	1650.33	17.2503															1254.7	36.4	1191.3	26.4	1096.5	58.3	1697.1	19.5
1886.11	98.9344																			1641.03	14.2107	1652.85	18.4518															1269	75.1	1191.6	26.9	1097	32	1748.3	10.6
1914.22	33.5517																			1643.99	15.0944	1657.56	17.8391															1272.5	26.4	1192	19	1098.4	40.8	1761.8	12.4
1921.55	102.263																			1644.34	20.5908	1657.78	19.4759															1273.1	14.3	1192.5	55.4	1099.8	28.2	1766.2	12.8
1993.93	22.233																			1645.32	16.1894	1660.34	20.728															1276.7	77.8	1192.7	19.3	1101.1	34.1	1791.5	11.5
2003.99	32.3673																			1646.64	16.7828	1660.58	20.4251															1276.8	52.1	1193.2	13.9	1102	24.7	1883.3	17
2056.11	36.1377																			1649.85	20.2445	1660.64	15.3306															1277.4	48.8	1195.6	22.3	1104	37.3	1899.4	9.2
2440.27	23.5474																			1651.94	16.9236	1661.09	16.2807															1293.1	6.1	1199.3	36.1	1104.2	34.6	1966.6	10.9
2560.58	71.3582																			1654.03	16.5428	1669.04	18.7623															1298.8	39.9	1199.5	112.8	1105.5	34.2	1969.1	16.6
2613.04	60.8043																			1658.05	19.659	1671.46	18.3222															1303.2	34.1	1202.4	13	1108.9	32.3	2095	12.7
2701.04	18.5343																			1658.8	14.3498	1681.89	15.989															1305.4	48.1	1202.7	15.7	1110.4	23.6	2418.8	9.6
2724.11	30.9757																			1660.1	16.546	1684.04	17.6016															1311.7	40.9	1208.1	3.2	1112.6	33	2695.7	12.1
2724.68	19.3083																			1661.24	16.2448	1686.45	17.4234															1313.7	29.3	1210.4	24.5	1116	21.3
2756.5	21.9677																			1661.28	13.3867	1692.85	15.3659															1317.1	4.6	1211.4	19.3	1120.4	29.8
2759.33	10.698																			1661.7	23.1247	1693.27	19.3937															1324.7	128.3	1212.1	190.6	1124.4	45.4
2773.37	42.3201																			1666.94	16.0787	1694.05	16.4691															1324.7	27.3	1212.2	65.7	1125.8	22.3
2787.15	23.9189																			1671.31	13.9674	1695.87	14.2731															1325.8	19.8	1212.4	13.8	1126.4	14.9
2796.94	31.7502																			1672.21	17.3617	1698.09	16.2629															1328.9	10.9	1213.4	30.8	1130.4	23.1
2814.51	33.3344																			1674.49	18.7149	1699.5	17.4721															1338.2	8.6	1213.9	10.5	1134.6	24.9
2817.55	33.6533																			1676.04	15.4223	1701.24	20.6362															1341.8	26.5	1217.6	22.6	1137.2	22
2894.12	25.6316																			1678.19	12.4011	1702.55	20.4515															1342.8	11.2	1233.6	15.7	1137.2	31.7
2906.42	31.3271																			1680.63	16.7683	1706.45	18.7564															1351.2	27.9	1233.9	14	1139.8	27.1
368.537	7.3336																			1684.03	21.1306	1711.44	17.8103															1356.2	31.7	1235.1	48.9	1142.8	25.1
392.938	9.74528																			1684.06	29.6846	1712.64	20.3807															1356.6	99	1235.3	17.9	1143.5	21
412.167	10.7314																			1688.18	14.237	1729.8	19.1692															1365.9	22.3	1235.5	13.1	1144.7	29.2
413.35	10.6696																			1693.78	17.7572	1731.11	18.3327															1367	24.6	1235.7	12.4	1145.2	24.8
418.799	10.8852																			1699.37	15.5561	1733.24	17.0691															1370.1	101.6	1237.8	10.3	1145.6	27.3
422.896	10.9131																			1700.84	21.8568	1735.53	14.2494															1371.4	26.7	1241.5	42.4	1146.3	23.4
424.258	10.3866																			1705.89	15.0448	1740.76	14.8788															1372	22.7	1248.9	22.9	1149.8	30.1
428.876	11.5204																			1708.65	14.4194	1741.62	15.482															1374.5	11.9	1252	37.4	1150.2	35.5
431.326	10.1754																			1723.04	21.2725	1742.54	18.2036															1375.6	10.3	1271.7	7.6	1150.5	33.9
432.461	8.6406																			1727.16	15.8374	1744.01	15.8404															1379.7	20	1271.8	15.5	1150.9	18.7
432.546	10.8251																			1734.63	16.9301	1744.26	18.2445															1392.3	8.3	1275.3	21.4	1151.5	22.9
435.205	9.48862																			1742.98	16.7791	1745.07	14.4514															1392.6	12.1	1284.1	8.8	1153.6	25.1
437.354	9.07148																			1743.71	14.4743	1746.57	14.1553															1397	36.5	1284.8	29.8	1154.2	22.1
442.303	9.63368																			1744.54	16.5005	1752.86	18.0295															1397.2	11.5	1289.1	20.6	1156.2	20.7
443.713	10.6478																			1747.76	16.8018	1762.86	15.2579															1408.5	19.2	1290.6	14.9	1159.1	42.2
449.905	11.0825																			1749.68	18.7809	1766.37	13.6536															1410.3	6.3	1295.7	47.2	1159.9	35.8
456.668	11.5565																			1750.89	19.8808	1768.08	22.2355															1437.9	16.1	1296.5	18.6	1162.6	29.6
471.887	10.73																			1753.23	17.529	1768.55	16.6773															1441.3	12.7	1297.9	29.4	1163.8	37.8
477.518	12.5128																			1753.93	12.9713	1770.79	18.7045															1444.7	32.1	1304.1	32	1164.1	18.2
550.782	14.8587																			1755.36	34.4067	1775.27	15.5751															1453	6.9	1304.8	19.8	1165.3	24.2
570.183	29.7456																			1758.84	20.4155	1778.22	14.8231															1468.5	21.5	1309.4	29.5	1169	33.5
573.675	12.6853																			1766.53	16.7693	1784.58	15.7408															1488.1	14.4	1312.1	27.7	1169.4	14.2
608.487	15.5553																			1768.13	16.9612	1791.79	16.4942															1493.3	10.3	1314.6	27.1	1170.1	28.6
648.453	16.4666																			1770.37	14.3059	1794.66	15.9024															1494.6	7.1	1317.8	7.3	1171.1	25.2
824.75	20.5462																			1770.49	16.7178	1800.28	15.8646															1497.2	19.1	1319	15.3	1171.4	48.6
920.684	18.4801																			1774.27	15.2861	1804.09	18.8458															1498.1	38.2	1322	41.9	1176.9	32.5
940.425	15.6207																			1780.06	14.9669	1807.36	14.7841															1501	14.9	1329.4	14.2	1176.9	24.5
970.285	23.5568																			1780.87	13.1316	1812.14	15.5717															1502.8	6.7	1332	37.6	1179.6	24.3
970.996	16.6554																			1786.08	16.8179	1818.26	15.255															1503.1	5.9	1333.1	18.7	1179.8	61.3
992.661	15.3652																			1787.46	16.2212	1823.57	13.225															1503.5	15.6	1336.2	7.9	1182.4	21.1
1002.47	21.5071																			1789.73	14.6972	1832.75	20.1561															1527.1	9.3	1341.8	25.5	1183.7	31.4
1038.17	18.9495																			1793.52	14.1841	1838.82	18.0177															1532.4	54.1	1343.3	72.5	1185	22.7
1042.36	21.1132																			1798.48	15.2222	1862.68	20.1869															1543.4	3.8	1347.7	23.5	1185.3	22.3
1051.92	32.7049																			1800.76	18.1062	1869.51	15.5011															1589.7	10.7	1351.5	24.4	1185.4	15.8
1053.73	19.1777																			1804.52	15.9584	1879.21	19.3376															1598.3	59.5	1356.2	75	1187.5	20.5
1060.56	29.2762																			1806.31	16.2061	1881.64	14.2788															1615.8	4.9	1359.6	31.9	1191.2	23.6
1062.24	19.681																			1815.06	18.6407	1884.94	14.9039															1616.9	19	1360.6	28.9	1192.7	23.6
1066.14	20.8362																			1818.33	14.5467	1886.4	18.9641															1617.3	21.1	1362.5	23.1	1193	33
1071.09	19.5867																			1819.29	16.4225	1886.44	23.6814															1618.2	19.7	1366.3	20	1193.4	24.5
1072.95	16.7706																			1828.29	16.5951	1898.72	15.6273															1622.4	34	1369.7	24	1195.9	35.5
1073.82	18.7225																			1837.18	18.8878	1911.97	12.0951															1629.4	8.1	1370.7	12.5	1196.2	31.8
1077.49	21.9655																			1844.36	18.5308	1913.4	19.0069															1632.4	18.6	1371.2	15	1198.1	24.9
1082.14	18.7198																			1853.2	17.5493	1915.33	11.9544															1633.3	24	1374.5	20.4	1200.5	26.1
1082.4	20.7546																			1863.5	17.2502	1924.77	18.9966															1636.1	37.4	1380.3	15.2	1202	18.4
1088.5	17.1818																			1866.9	17.0199	1973.4	14.1251															1637.4	5.3	1393.8	33.8	1204.3	15.8
1089.3	22.1691																			1901.93	12.502	1998.46	18.0154															1637.5	9.2	1394.3	20.2	1204.4	40.7
1105.75	24.5563																			1903.86	15.6319	2034.7	17.2447															1637.7	12.8	1394.3	3.8	1214.2	22.2
1118.05	20.6654																			1914.55	13.225	2166.14	15.0091															1639	8.4	1395.6	25	1217.6	22.6
1118.22	24.6873																			1939.18	13.5758	2375.07	21.3842															1642.7	22.4	1396.7	33.6	1219.3	12
1121.03	21.2973																			1946.58	17.8874	2461.94	22.4697															1644	14.5	1400.4	16.9	1221.9	27.6
1124.03	18.9238																			1955.9	13.9038	2490.69	14.488															1645.8	21.5	1424.4	18.7	1226.2	27.4
1125.78	18.5652																			1957.92	15.614	2531.88	11.4238															1647.6	13.5	1429.8	41	1226.8	28.2
1135.64	13.1594																			1959.05	14.9972	2635.33	18.0633															1648.4	3.9	1430.4	10.2	1234	34.6
1138.88	16.3543																			1976.25	12.5716	2644.9	14.7922															1648.9	4.9	1434.1	23.2	1234.8	30.1
1141.03	21.8944																			1984.65	17.561	2648.69	18.7061															1649.1	36.1	1435.5	13	1236.9	38.1
1145.52	18.8306																			1985.84	15.0254	2663.65	17.2386															1649.5	16.1	1444.6	8.2	1240.3	37.3
1147.48	21.307																			2027.3	15.108	2663.73	14.8254															1650.6	14.7	1447.9	27.2	1240.7	21.1
1152.14	16.1683																			2065.5	12.2182	2669.8	15.0528															1653.2	4.6	1449.7	19.1	1243.8	18.3
1161.24	16.8153																			2086.74	15.8541	2671.65	13.3339															1653.6	14.2	1451	12.2	1257.3	40.1
1164.84	18.3376																			2109	13.2797	2680.76	15.3169															1653.9	85	1452.4	9.8	1260.7	20.3
1166.92	19.9892																			2120.87	18.9532	2703.64	16.2929															1654.9	6.2	1453.4	4.8	1263.5	29.1
1181.77	16.8864																			2268.95	13.6139	2717.18	16.0916															1655.4	10.1	1453.7	17.4	1279.2	28.7
1183.31	18.0745																			2391.22	14.4605	2722.17	16.561															1655.9	3.9	1457.3	17	1293.1	34.1
1184.72	20.6219																			2477.32	18.247	2732.31	13.4939															1656.3	14.3	1460.7	54.3	1298.6	19.4
1203.92	21.2819																			2483.5	13.6706	2738.63	14.3477															1658.4	9.1	1466.2	24.1	1299.9	28.3
1204.33	16.3512																			2552.18	15.0729	2760.76	13.0771															1661.2	20.4	1467	14.9	1302.4	30.3
1204.76	28.4172																			2553.03	15.8365	2785.03	17.7192															1667.2	11.6	1478.6	41.4	1334.6	24.2
1221.04	19.6811																			2619.88	16.0227	2785.06	13.253															1669.5	17.8	1479.4	37.7	1338.6	16
1224.55	15.8423																			2631.52	18.6119	2785.44	15.1582															1673.7	11.2	1544.3	64.7	1342.3	24.1
1241.05	19.8872																			2632.62	15.3088	2794.77	14.757															1679.7	20.5	1548.3	91.8	1348.5	32.8
1253.51	14.8053																			2637.73	14.7588	2796.58	16.9571															1684.2	8.4	1588.4	2.2	1352.4	30.1
1264.52	32.9524																			2644.81	15.4689	2816.84	13.5219															1689.7	12.4	1603.2	6.6	1354.5	22.4
1284.73	17.4546																			2658.95	16.119	2830.65	13.9521															1708.2	16.3	1606.1	14.7	1357.9	10.6
1285.59	18.2331																			2666.93	14.8471	2848.51	12.5299															1725.9	3.9	1630.7	31.1	1360.4	19.6
1313.69	16.9003																			2683.95	19.5103	2857.8	12.6287															1738.3	6.1	1638.5	15.8	1373.1	41
1335.59	15.1196																			2692.74	10.2801	2896.8	16.9592															1743.4	4.5	1699.7	17.4	1377.6	19
1343.07	16.3853																			2694.43	19.1849	2958.72	12.9455															1744.5	6.3	1770.1	8.4	1380.8	36.2
1346.07	17.0839																			2706.55	15.4504	3028.35	13.1129															1745.9	11.7	1895.2	7.3	1381.6	21.5
1364.98	13.2074																			2712.55	11.0371	3123.82	13.7402															1749.5	14.5	2659.5	18.6	1382	66.7
1375.86	21.4414																			2719.37	13.3655																	1756	9.3	2715	18.1	1390.8	32.4
1375.87	20.8715																			2729.76	15.1724																	1756.6	15.4	2720.8	8.8	1396.3	19.4
1383.83	16.9294																			2759.15	16.1856																	1761.2	31.8			1403.6	30.9
1390.12	19.5178																			2759.8	22.4609																	1763.7	4.6			1406.2	28.2
1392.6	14.3048																			2764.77	12.0192																	1783.9	20			1422.7	40.4
1397.66	17.7896																			2769.15	15.5202																	1784.7	11			1428.4	24.2
1408.28	15.4714																			2779.27	15.8885																	1792.5	11.3			1439.2	25.8
1412.93	18.9782																			2788.97	16.2679																	1803.7	5.6			1447.9	25.2
1416.89	15.4312																			2804.78	15.468																	1806	19.1			1449.6	34.5
1418.61	22.5341																			2863.89	13.8662																	1807.8	4.6			1453.8	34.9
1425.53	16.1973																			2907.39	18.7066																	1808.9	13.3			1455.1	21.9
1426.19	14.4858																			2926.02	14.6904																	1811.2	6.7			1468.7	31.6
1426.54	17.7409																			2958.49	15.6444																	1811.3	12.2			1473.1	18
1428.42	31.4471																			2984.87	12.8248																	1842.4	4.6			1478.1	27.2
1436.32	18.383																			3050.94	15.9943																	1843.1	39.4			1485.8	40.3
1437.73	19.7697																			3173.19	14.5636																	1896.3	6.9			1523.6	28.4
1441.89	28.9976																																					1901.2	10.2			1529.7	25.3
1456.94	16.4237																																					1906.1	7.6			1565.1	19.4
1457.32	16.2622																																					1987.2	3			1577.7	25.8
1460.94	18.7266																																					2531.9	6.8			1583.9	27.2
1470.71	20.0324																																					2566.8	2.5			1603.6	20.5
1473.61	46.7723																																					2567.5	7.8			1626.1	19
1474.56	19.0758																																					2583.6	5.2			1637.8	17.7
1477.2	19.0629																																					2673	11.6			1641	24.8
1478.37	17.3118																																					2688	10.9			1656.7	22.5
1482.8	21.6634																																					2696.2	2			1656.9	39.2
1483.42	16.0333																																					2701.7	4.2			1667	25.5
1483.51	17.9357																																					2702.4	3.8			1674.6	28
1484.93	14.1996																																					2708.1	2.7			1701.2	39.7
1486.48	14.9069																																					2709.9	7.5			1732.2	30.6
1493.18	17.585																																					2714.1	12.1			1745.9	21.2
1494.29	15.755																																					2714.6	2.7			1759.6	26.3
1496.23	25.1697																																					2716	6.4			1761.8	15.4
1498.02	18.5481																																					2716.3	3.1			1780.7	18.6
1498.14	18.1867																																					2718.4	3.2			1795.7	17.3
1498.66	19.8677																																					2723.5	10.3			1816.1	22.8
1498.68	18.5175																																					2724.2	2.3			1822.4	13.5
1498.94	16.3363																																					2726.2	12.3			1823.3	19.3
1499.8	16.8269																																					2728.9	2.6			1868.1	17.7
1501.28	12.7169																																					2748.9	5.3			1876.3	19.4
1501.96	14.1198																																					2751.4	6.8			1881.9	23.2
1501.96	19.5908																																					2763.4	2.2			2675.1	26.7
1503.69	21.3058																																					2791.2	5.2			2682.8	17.1
1505.15	25.0525																																					2813.1	2.4			2718.1	13
1505.6	16.1744																																					2986	2.6			2728.3	9.8
1508.35	16.8027																																					3007.2	1.2			2773	15.8
1508.4	22.1315																																					3591.4	7.9			2846.4	16.8
1512.97	14.1806
1523.18	17.4617
1536.77	14.6048
1537.61	16.526
1537.67	18.5622
1543.95	17.7288
1544.13	17.117
1559.84	19.1238
1580.41	14.758
1588.49	16.4924
1591.06	15.6369
1591.15	14.334
1594.35	18.5321
1594.89	21.7834
1599.96	18.7229
1601.49	21.8366
1602.23	16.3367
1602.69	18.7761
1606.63	28.9142
1607.27	17.4167
1607.54	20.8001
1607.86	17.5011
1608.52	17.6995
1611.11	19.0614
1612.83	18.7846
1614.01	15.0628
1614.36	21.7911
1614.85	20.5221
1616.15	15.5155
1618.11	17.1669
1618.78	21.0964
1619.44	20.647
1623.6	20.8194
1624.44	14.9056
1625.4	19.5677
1625.57	19.8881
1626.24	19.6227
1626.43	19.5991
1627.52	16.1759
1630.31	18.3163
1631.16	14.4671
1636.76	17.2941
1636.8	21.8313
1637.64	18.0692
1638.63	17.1917
1638.79	17.0238
1641.03	14.2107
1643.99	15.0944
1644.34	20.5908
1645.32	16.1894
1646.64	16.7828
1649.85	20.2445
1651.94	16.9236
1654.03	16.5428
1658.05	19.659
1658.8	14.3498
1660.1	16.546
1661.24	16.2448
1661.28	13.3867
1661.7	23.1247
1666.94	16.0787
1671.31	13.9674
1672.21	17.3617
1674.49	18.7149
1676.04	15.4223
1678.19	12.4011
1680.63	16.7683
1684.03	21.1306
1684.06	29.6846
1688.18	14.237
1693.78	17.7572
1699.37	15.5561
1700.84	21.8568
1705.89	15.0448
1708.65	14.4194
1723.04	21.2725
1727.16	15.8374
1734.63	16.9301
1742.98	16.7791
1743.71	14.4743
1744.54	16.5005
1747.76	16.8018
1749.68	18.7809
1750.89	19.8808
1753.23	17.529
1753.93	12.9713
1755.36	34.4067
1758.84	20.4155
1766.53	16.7693
1768.13	16.9612
1770.37	14.3059
1770.49	16.7178
1774.27	15.2861
1780.06	14.9669
1780.87	13.1316
1786.08	16.8179
1787.46	16.2212
1789.73	14.6972
1793.52	14.1841
1798.48	15.2222
1800.76	18.1062
1804.52	15.9584
1806.31	16.2061
1815.06	18.6407
1818.33	14.5467
1819.29	16.4225
1828.29	16.5951
1837.18	18.8878
1844.36	18.5308
1853.2	17.5493
1863.5	17.2502
1866.9	17.0199
1901.93	12.502
1903.86	15.6319
1914.55	13.225
1939.18	13.5758
1946.58	17.8874
1955.9	13.9038
1957.92	15.614
1959.05	14.9972
1976.25	12.5716
1984.65	17.561
1985.84	15.0254
2027.3	15.108
2065.5	12.2182
2086.74	15.8541
2109	13.2797
2120.87	18.9532
2268.95	13.6139
2391.22	14.4605
2477.32	18.247
2483.5	13.6706
2552.18	15.0729
2553.03	15.8365
2619.88	16.0227
2631.52	18.6119
2632.62	15.3088
2637.73	14.7588
2644.81	15.4689
2658.95	16.119
2666.93	14.8471
2683.95	19.5103
2692.74	10.2801
2694.43	19.1849
2706.55	15.4504
2712.55	11.0371
2719.37	13.3655
2729.76	15.1724
2759.15	16.1856
2759.8	22.4609
2764.77	12.0192
2769.15	15.5202
2779.27	15.8885
2788.97	16.2679
2804.78	15.468
2863.89	13.8662
2907.39	18.7066
2926.02	14.6904
2958.49	15.6444
2984.87	12.8248
3050.94	15.9943
3173.19	14.5636
371.937	4.70916
372.35	5.48125
376.537	4.93838
380.013	7.90317
396.06	5.33653
410.686	5.64088
413.13	5.00167
429.046	6.08587
431.732	4.70509
439.657	5.7604
441.371	6.07163
441.881	5.6676
454.776	6.1474
455.195	5.05966
463.239	6.64657
465.702	5.46516
480.879	4.53555
534.513	5.09016
549.666	7.15004
608.566	7.96054
724.43	11.2083
728.061	10.3835
931.592	28.8709
954.057	21.2526
960.939	17.3154
967.201	22.5488
980.411	22.2248
1000.97	19.4625
1015.64	15.8423
1016.19	29.228
1026.22	19.5099
1043.07	18.1555
1061.61	31.6862
1072.4	21.7195
1073.28	23.1302
1073.45	25.9465
1074.92	23.1366
1076.51	23.394
1076.71	16.3161
1084.61	19.8245
1087.87	17.0095
1090.69	21.0426
1097.43	23.834
1098.3	24.4781
1104.91	26.1528
1105.66	24.3185
1115.46	19.6829
1116.3	24.0951
1120.86	15.4444
1130.25	26.3934
1131	17.9428
1139.51	19.8282
1141.5	25.8702
1142.13	18.5386
1148.13	22.0259
1152.32	22.1044
1156.3	21.8688
1158.02	19.3917
1159.21	19.9627
1164.73	21.3219
1169.86	31.6337
1170.49	35.2239
1181.94	38.5112
1218.17	22.9824
1221.88	25.0923
1222.57	20.4894
1227.63	16.7558
1233.51	16.192
1236.95	16.2209
1242.16	15.0988
1248.71	28.4626
1250.22	18.9302
1250.94	16.682
1259.19	25.9495
1260.15	23.5158
1269.13	23.4404
1272.06	17.3765
1273.12	17.4144
1275.8	18.6228
1302.29	24.4615
1312.52	24.1915
1322.31	19.3677
1325.38	19.4355
1325.5	19.3237
1326.27	16.8215
1328.43	16.4629
1331.56	22.1754
1331.9	17.8753
1334.36	17.6376
1351.01	24.5285
1353.27	14.505
1359.37	18.0102
1380.61	17.0404
1380.73	18.0674
1386.57	16.0065
1388.13	18.553
1396.7	11.8586
1403.8	17.7279
1409.16	16.301
1412.64	20.6037
1424.67	18.7783
1427.86	45.2363
1445.9	21.1997
1446.21	17.7475
1446.53	17.5751
1450.2	20.9256
1454.85	14.0619
1459.37	22.9817
1461.14	18.2573
1461.27	15.3489
1466.18	21.1074
1472.4	22.416
1483.81	17.5035
1484.74	17.5705
1485.55	22.5659
1488.79	15.4794
1491.86	18.5848
1493.59	19.2567
1493.66	18.606
1494.26	18.8114
1504.67	23.7549
1510.89	21.4148
1512.02	31.3307
1515.62	12.8026
1515.8	23.1294
1516.69	17.2534
1518.39	22.8536
1521.64	18.2433
1521.78	25.8126
1522.33	17.033
1525.15	19.7753
1535.5	22.441
1537.19	19.5955
1543.81	17.0623
1560.08	21.1499
1575.25	24.1512
1579.09	21.515
1582.51	17.7067
1585.05	17.122
1586.15	18.1468
1599.16	16.3194
1602.52	18.6469
1609.56	18.6978
1609.74	17.4644
1610.51	14.5152
1611.13	15.905
1617.7	25.8173
1622.05	16.1775
1624.42	18.9644
1625.72	15.5339
1627.75	16.7318
1628.24	15.8774
1628.26	17.4263
1630.09	18.0666
1632.88	18.4951
1633	23.9238
1633.32	18.4757
1633.57	16.8704
1635.76	18.457
1636.96	17.026
1639.02	18.4398
1639.3	16.8826
1640.71	19.802
1641.81	16.2294
1643.79	15.424
1644.72	17.5802
1645.79	17.5184
1646.13	16.8576
1648.07	16.1821
1648.08	16.6327
1649.87	18.5097
1650.33	17.2503
1652.85	18.4518
1657.56	17.8391
1657.78	19.4759
1660.34	20.728
1660.58	20.4251
1660.64	15.3306
1661.09	16.2807
1669.04	18.7623
1671.46	18.3222
1681.89	15.989
1684.04	17.6016
1686.45	17.4234
1692.85	15.3659
1693.27	19.3937
1694.05	16.4691
1695.87	14.2731
1698.09	16.2629
1699.5	17.4721
1701.24	20.6362
1702.55	20.4515
1706.45	18.7564
1711.44	17.8103
1712.64	20.3807
1729.8	19.1692
1731.11	18.3327
1733.24	17.0691
1735.53	14.2494
1740.76	14.8788
1741.62	15.482
1742.54	18.2036
1744.01	15.8404
1744.26	18.2445
1745.07	14.4514
1746.57	14.1553
1752.86	18.0295
1762.86	15.2579
1766.37	13.6536
1768.08	22.2355
1768.55	16.6773
1770.79	18.7045
1775.27	15.5751
1778.22	14.8231
1784.58	15.7408
1791.79	16.4942
1794.66	15.9024
1800.28	15.8646
1804.09	18.8458
1807.36	14.7841
1812.14	15.5717
1818.26	15.255
1823.57	13.225
1832.75	20.1561
1838.82	18.0177
1862.68	20.1869
1869.51	15.5011
1879.21	19.3376
1881.64	14.2788
1884.94	14.9039
1886.4	18.9641
1886.44	23.6814
1898.72	15.6273
1911.97	12.0951
1913.4	19.0069
1915.33	11.9544
1924.77	18.9966
1973.4	14.1251
1998.46	18.0154
2034.7	17.2447
2166.14	15.0091
2375.07	21.3842
2461.94	22.4697
2490.69	14.488
2531.88	11.4238
2635.33	18.0633
2644.9	14.7922
2648.69	18.7061
2663.65	17.2386
2663.73	14.8254
2669.8	15.0528
2671.65	13.3339
2680.76	15.3169
2703.64	16.2929
2717.18	16.0916
2722.17	16.561
2732.31	13.4939
2738.63	14.3477
2760.76	13.0771
2785.03	17.7192
2785.06	13.253
2785.44	15.1582
2794.77	14.757
2796.58	16.9571
2816.84	13.5219
2830.65	13.9521
2848.51	12.5299
2857.8	12.6287
2896.8	16.9592
2958.72	12.9455
3028.35	13.1129
3123.82	13.7402
[truncated: 62 more columns]

## Sheet: 2-Desmoinesian-Virgilian
AZ Shelf 2		MS04		MS05		MS06		MC05		GS01		GS09		MC17		GS11		MC20		GS24		V18		V20		EC01		RC01		RC19		V10		V01		V22		V25		DMR01		LC01		SP01		CF02		HT02
451.643	8.94625	995.16	25.179	1006.91	28.7415	1040.27	19.5242	511.337	10.6974	516.421	11.8501	425.267	8.594	1737.67	7.61968	346.483	9.63591	372.27	12.4215	326.637	6.59068	466.883	10.1687	1121.84	15.646	372.505	9.84204	1718.58	13.1055	333.539	8.77532	1693.43	13.3272	210.364	14.2833	1095.67	21.9777	586.686	21.8758	512.736	11.3864	511.544	11.9468	526.193	10.8521	513.656	8.14124	329.975	5.16884
464.05	2.33015	1007.45	20.6256	1007.92	20.0065	1041.15	22.1692	518.238	6.58607	1006.52	14.9972	601.453	15.5946	1041.22	13.6439	390.939	11.2272	423.824	7.21373	434.765	12.0318	1029.49	13.6482	1381.19	12.5242	390.596	10.2069	1735.94	13.4876	416.001	13.1227	1590.82	15.4623	253.982	7.10367	1098.7	16.8592	1035.95	14.9377	516.486	9.13532	516.17	15.0167	526.418	12.1038	514.389	8.08573	330.23	3.93188
653.107	14.5138	1011.49	72.276	1013.41	21.6918	1050.15	17.8617	539.548	10.7113	1053.87	19.886	879.028	24.1052	1661.04	11.1091	439.084	9.89564	426.997	6.7477	566.727	10.4268	1121.1	14.7715	1406.51	10.8859	415.653	13.2506	1719.83	16.2738	430.027	13.7085	1697.9	16.6816	303.728	6.0415	1386.66	11.5093	1114.94	12.9538	523.123	11.3319	520.566	9.58353	1048.06	20.6939	519.278	9.99417	399.65	6.93813
665.941	14.268	1033.49	20.9448	1018.08	22.7076	1050.83	18.422	1048.38	15.7896	1077.7	17.0816	937.916	16.6807	1546.73	12.5902	476.108	10.9279	447.087	7.73974	1130.57	15.2588	1661.02	12.2401	1451.06	11.6087	985.273	20.652	1741.32	11.4006	520.028	9.8697	1456.36	12.21	431.035	11.3278	1594.44	8.52924	1145.72	11.7793	532.442	11.4828	521.638	12.0944	1382.26	16.9341	520.94	8.65449	418.983	6.49329
870.114	21.0133	1035.76	22.0061	1027.56	18.8783	1052.54	15.7483	1050.9	15.1423	1083.32	17.6289	961.541	25.6044	1645.23	18.2813	918.391	19.4269	475.79	8.64085	1338.53	15.2418	1667.75	16.0901	1661.42	10.7495	1030.45	22.5526	1690.22	16.0015	544.778	9.32342	1775.17	11.988	446.074	11.9473	1638.6	7.81812	1409.71	12.5979	533.402	13.7484	522.092	8.26335	1385.26	17.4928	522.012	8.46679	420.042	5.47229
884.126	22.1722	1037.18	27.7	1031.33	19.1424	1052.88	17.6847	1068.99	11.3515	1083.89	13.1878	965.236	19.4273	1378.25	11.8498	1011.97	18.7105	536.826	9.65659	1356.79	15.1433	1675.76	13.9071	1675.26	13.4268	1036.65	36.0431	1718.42	12.0343	554.513	14.4127	1466.6	15.0211	545.731	12.2678	1673.71	12.8374	1477.39	13.9871	1099.4	20.4514	528.413	9.15762	1390	20.9046	522.303	9.84779	427.622	6.64271
954.959	27.3316	1042.1	46.1833	1032.89	17.2099	1053.1	26.0176	1101.98	11.5273	1090.95	15.4484	1051.87	23.5427	1238.01	12.0846	1018.3	18.3378	584.796	9.14835	1395.3	12.0796	1677.78	15.0778	1675.57	14.038	1065.03	24.643	1736.68	13.7523	564.399	13.8354	2776.01	23.3805	570.39	38.1125	1689.09	9.07486	1662.62	10.4727	1368.52	21.3183	534.543	13.44	1394.7	20.3013	524.815	11.1231	431.306	5.69001
989.301	51.4729	1043.16	21.4504	1032.89	18.9289	1055.99	15.2743	1248.68	12.7263	1117.54	15.248	1064.36	17.1625	1120.89	12.8081	1036.34	14.8253	588.17	14.1681	1402.77	12.0266	1678.56	14.6266	1682.09	11.7384	1067.16	28.6388	1732.43	12.4675	565.547	14.5014	1742.05	14.9744	576.407	18.074	1689.84	10.16	1668.51	15.2226	1382.06	18.503	1385.74	14.9276	1395.5	16.393	532.519	7.14438	444.098	5.33009
1024.79	27.3748	1043.83	16.8149	1035.7	46.0753	1062.01	18.8861	1344.71	11.5242	1129.79	19.4095	1064.44	16.8798	1635.68	12.6776	1086.18	19.2034	612.596	13.1304	1403.96	11.9067	1680.15	13.4803	1694.8	15.8565	1082.49	20.7372	1741.08	11.6608	567.543	46.6112	1593.46	14.1734	953.79	17.2917	1691.88	12.9298	1669.9	13.9785	1390.54	21.4902	1390.07	16.8725	1398.04	18.3902	1390.99	19.4639	447.682	5.79206
1078.18	73.8904	1045.61	40.2294	1037.64	33.9644	1064.62	18.1825	1353.42	10.7235	1189.7	15.8235	1073.26	14.0266	1383.22	13.4728	1346.75	12.1877	943.451	12.9125	1406.39	13.1063	1682.86	14.4614	1695.45	16.8001	1108.7	29.7793	1623.13	12.5183	568.656	9.91607	1816.8	11.8322	1023.22	12.4573	1692.14	10.5445	1671.03	13.7849	1394.07	15.8397	1392.02	18.766	1399.39	20.7133	1398.63	16.7015	448.797	5.03781
1095.34	64.847	1049.31	23.8999	1038.28	28.0716	1065.77	17.1614	1353.5	13.5835	1225.31	17.7116	1075.23	20.6062	1622.98	10.9627	1353.48	21.3834	976.952	14.2951	1406.66	14.2248	1689.55	16.8366	1696.56	15.5729	1111.86	18.7631	1755.84	12.5552	580.693	14.966	1770.99	14.9491	1407.69	13.1905	1692.26	9.56976	1671.56	14.6675	1400.92	12.5603	1392.23	16.1813	1400.51	20.5959	1399.11	17.4831	450.953	5.0589
1096.01	50.346	1050.52	21.3759	1039.59	19.8279	1067.74	18.3761	1353.99	14.7376	1240.52	12.23	1088.96	27.7316	1157.77	11.1642	1404.9	14.9452	1008.04	13.1173	1408.77	12.6668	1690.82	14.8183	1699.24	13.6727	1116.91	20.3085	1743.61	12.1113	585.036	14.7415	1610.94	14.7025	1515.47	12.6243	1695.12	9.59431	1675.36	11.2627	1401.62	15.6216	1398.08	18.3519	1401.68	19.4161	1403.78	13.9006	452.874	5.00852
1099.24	52.7673	1051.27	23.441	1040.86	26.9074	1069.14	21.3217	1362.01	11.4604	1322.04	17.291	1107.81	17.923	1141.77	10.5837	1409.51	12.9137	1024.94	13.3473	1411.26	15.0704	1692.91	13.4167	1699.79	13.4772	1124.71	27.3873	1029.4	23.2078	634.346	15.1984	1046.67	14.9706	1617.52	16.3404	1695.63	10.0112	1675.88	9.71759	1403.72	14.7953	1401.32	16.2773	1406.56	17.8449	1409.59	12.5789	461.615	6.07649
1100.4	44.3083	1051.61	26.4923	1041.08	21.5693	1070.69	16.5064	1370.72	7.23646	1352.54	19.0578	1117.73	17.6698	1762.42	11.7755	1416.29	13.1148	1027.8	13.3666	1411.74	12.2582	1693.39	10.0374	1699.83	10.4187	1126.62	18.7843	1770.9	15.1242	982.55	11.3282	444.937	13.7184	1624.68	13.265	1697.11	10.6782	1676.46	19.2862	1411.46	18.6759	1402.99	18.0881	1407.02	16.604	1412.25	13.3335	494.77	6.27153
1109.52	45.7227	1055.84	20.9679	1045.84	22.4988	1072.44	28.6704	1392.66	16.5968	1391.63	21.0396	1127.44	19.5118	1839.31	6.82795	1417	13.312	1027.92	11.8224	1412.01	14.7373	1694.19	16.1724	1700.09	17.4364	1138.62	28.5113	1741.84	13.621	985.242	21.2276	1764.06	17.1223	1626.79	16.6514	1697.17	10.3676	1678.03	14.0188	1412.69	13.8507	1403.44	18.5214	1408.12	19.7943	1414.76	16.878	550.852	10.4783
1109.78	49.2963	1057.8	21.3299	1047.35	17.572	1072.44	24.9524	1407.89	11.8725	1413.36	15.059	1151.2	15.419	1419.96	13.3309	1417.01	12.9811	1044.48	19.5421	1417.95	13.2366	1700.5	20.9658	1700.65	12.0398	1193.88	34.2842	1734.71	12.2547	1032.07	17.8685	1794.91	19.0278	1626.82	13.7103	1697.33	10.2146	1678.29	11.7966	1412.92	20.7076	1404.64	18.7082	1409.19	20.2422	1416.08	17.441	965.08	21.0915
1123.11	61.7114	1058.72	36.8702	1048.82	22.4121	1074.48	16.8308	1413.02	10.8166	1418.36	15.8543	1151.31	13.0596	1522.14	13.8157	1417.33	16.5162	1049.73	17.1865	1419.48	15.2185	1701.13	11.199	1705.27	12.9809	1338.2	22.2534	1710.3	14.9669	1032.84	17.971	1680.02	13.006	1642.45	11.5348	1699.06	10.8426	1678.62	10.254	1413.43	17.978	1405.52	14.0967	1409.96	17.846	1417.92	15.0588	982.095	20.2596
1137.14	30.1567	1059.73	21.3786	1050.51	17.5779	1075.64	13.5806	1413.24	9.83405	1418.8	12.3641	1154.06	13.8333	1163.43	11.3833	1422.57	12.991	1075.44	16.8518	1420.4	12.9971	1703	16.2711	1708.44	10.5971	1352.52	17.8286	1726.35	14.4489	1075.15	13.7323	1779.92	12.8404	1644.27	14.4218	1700.8	12.3361	1678.69	10.3717	1413.71	17.0335	1406.12	23.7347	1410.22	22.1862	1420.04	13.899	983.633	56.2239
1139.14	26.3664	1059.87	18.5938	1051.59	21.9806	1076.15	14.926	1418.92	13.9644	1423.04	10.7475	1157.03	20.096	1413.64	12.1343	1422.68	11.763	1111.18	18.3798	1420.52	14.2242	1703.66	14.3684	1708.91	12.61	1358.96	17.5872	1756.29	10.6818	1083.58	16.0313	1664.86	10.6989	1646.67	10.9614	1701.09	11.9864	1680.01	11.4121	1416.33	16.9793	1407.58	16.7586	1413.27	18.4071	1420.28	15.4653	1034.72	21.4164
1144.46	38.4559	1062.69	23.1953	1053.45	22.132	1077.34	19.1115	1419.18	13.2905	1423.33	13.6259	1159.9	17.3744	1778.06	8.67051	1423.9	14.1281	1111.84	13.1831	1420.89	10.8666	1704.54	15.2236	1709.2	14.7699	1368.47	23.3537	1731.62	13.3264	1098.87	18.9306	1563.55	15.1293	1661.37	12.4829	1701.13	9.85604	1680.07	10.7258	1416.6	17.2782	1409.18	18.3237	1413.6	21.0078	1420.54	14.2202	1044.82	23.7946
1147.87	41.0388	1063.9	15.6928	1053.72	20.5661	1077.54	19.3629	1420.41	12.3873	1424.73	11.0806	1174.13	14.8723	1795.52	8.82108	1424.3	16.9433	1120.81	11.7627	1420.93	15.8116	1719.73	12.7346	1711.28	11.3379	1374.21	21.9823	1774.74	15.2579	1118.12	15.8196	1197.1	16.5436	1663.43	13.3424	1701.6	13.6151	1680.19	11.4964	1416.99	16.8388	1409.42	19.1094	1415.75	15.7301	1420.9	13.2246	1177.79	21.3709
1156.1	31.4301	1064.38	17.0849	1054.48	18.8823	1077.94	20.6658	1421.07	10.7085	1427.74	18.0391	1190.03	30.5843	1332.09	12.5891	1425.17	14.7236	1137.24	23.3864	1421.13	11.8376	1726.47	15.1449	1712.98	15.8364	1379.28	18.9744	1731.66	12.5266	1158.65	16.815	336.371	9.08982	1663.87	20.3949	1702.9	15.5872	1683.33	10.2144	1419.2	16.5038	1410.63	16.1948	1418.38	19.6162	1421.39	15.0167	1281.85	26.7245
1158.79	41.7361	1064.61	20.0775	1055.36	17.915	1079.3	16.4359	1422.02	11.0252	1429.53	15.5126	1212.73	16.5726	1024.55	14.9859	1427.5	14.6477	1138.41	15.9315	1421.36	16.0424	1736.97	15.0916	1713.48	11.8953	1383.14	36.0469	1718.83	12.7105	1173.83	17.4785	1336.82	16.7439	1666.38	14.0579	1704.05	11.1933	1683.42	14.2413	1419.26	16.7053	1410.8	13.0953	1419.41	18.7301	1422.06	13.1089	1416.31	29.7805
1177.38	50.8562	1065.07	20.4044	1055.94	18.0293	1080	15.704	1422.52	11.3494	1432.43	14.3245	1233.84	14.1508	1158.16	19.759	1427.61	12.9945	1160.57	11.2828	1421.56	13.2674	1740.23	11.5162	1715.46	14.2186	1411.09	23.7783	1722.95	14.7405	1173.92	16.6043	1682.01	18.3199	1671.9	20.2883	1704.27	11.3538	1684.2	12.8927	1420.09	11.622	1414.72	18.8572	1420.13	18.6324	1422.16	13.4595	1503.56	15.9538
1178.91	42.5394	1065.55	24.9307	1057.32	19.2951	1081	17.7967	1422.93	15.2131	1432.56	13.7874	1239.43	18.2263	1586.37	10.8252	1427.66	14.9663	1191.58	13.8639	1421.82	10.4916	1741.48	15.8999	1716.7	14.9031	1411.76	15.2538	1787.47	17.1814	1175.67	17.2189	1745.42	15.0831	1675.82	14.7951	1704.27	10.6664	1684.26	10.331	1420.22	20.7476	1414.77	19.9448	1420.21	15.6643	1422.34	14.0033	1513.74	16.1028
1193.36	23.8707	1066.35	18.7963	1058.87	23.5574	1081.34	17.5776	1423.33	11.5813	1433.58	9.39061	1288.96	16.5427	1067.58	13.0347	1428.28	14.3303	1201.42	16.0768	1422.31	11.8494	1742.52	10.7201	1717.43	16.074	1411.83	23.5552	1737.87	15.6431	1234.62	20.0244	1630.31	14.1337	1676.15	12.9416	1704.28	9.34587	1684.61	13.6675	1421.28	17.7092	1416.25	19.1716	1421.44	18.196	1422.92	15.8806	1577.58	20.63
1193.71	58.8731	1069.42	16.8934	1060.35	24.6169	1081.34	17.4386	1424.54	14.1768	1434.78	11.7023	1290.55	14.239	2765.46	10.0867	1429.52	12.1863	1237.45	15.316	1423.05	10.6473	1747.15	11.558	1719.68	13.5128	1420.93	21.8545	1716.63	10.1166	1307.79	14.8022	2678.13	13.8651	1676.48	12.6621	1704.58	8.18259	1685.11	13.7494	1421.91	15.1206	1417.17	15.3475	1422.39	17.0416	1426.69	17.2582	1632.14	14.8728
1200.6	51.8328	1070.47	15.6117	1061.02	25.2655	1083.37	22.9013	1426.15	12.8518	1435.39	16.377	1292.51	20.9529	1765.69	10.1235	1429.89	13.8826	1273.62	11.063	1423.91	11.8639	1755.25	16.1043	1721.96	12.5136	1421.64	22.821	1734.46	15.8082	1309.44	16.8197	437.191	13.1134	1677.35	12.8582	1704.79	10.1133	1686.64	11.1595	1423.14	21.6987	1418.02	14.4307	1423.39	20.5103	1427.06	16.4334	1646.94	14.3238
1207.27	53.5116	1070.82	18.9911	1062.56	20.8342	1083.42	21.9803	1428.69	11.6916	1441.74	14.1531	1295.85	13.2861	1222.38	10.9219	1431.8	16.4425	1319.38	13.331	1424.16	10.6456	1778.93	11.4474	1726.39	12.3396	1424.53	20.2501	601.806	11.1746	1315.55	16.0497	989.491	15.6234	1677.53	13.8363	1705.08	10.1068	1686.99	14.5335	1423.31	16.7831	1418.07	19.8534	1424.61	18.7841	1427.8	18.3294	1650.78	16.1744
1210.34	17.9287	1071.14	17.2981	1063.28	25.545	1084.94	22.2697	1429.83	16.4853	1441.78	17.8296	1384.83	15.9342	1290.06	9.3758	1431.85	15.0912	1354.43	19.4497	1425.76	15.1172	1783.82	16.4347	1726.65	10.0181	1427.12	17.7673	1751.49	10.0818	1392.63	14.7271	1444.16	15.0042	1678.7	14.6505	1705.2	10.9336	1688.08	10.7217	1423.5	19.0592	1418.78	16.6865	1425.48	14.9745	1429.78	17.2939	1659.36	19.1927
1264.86	49.8457	1071.83	21.2251	1064.4	22.2377	1085.04	19.3965	1436.02	16.0788	1443.12	14.0609	1397.93	11.5584	1612.86	10.7205	1431.9	14.7462	1375.34	11.4525	1425.85	15.1967	1797.69	14.897	1730.5	10.1673	1431.57	20.8327	1880.61	12.671	1420.65	15.9107	2850.99	14.1341	1678.85	13.9654	1705.28	7.5804	1688.31	13.9059	1424.63	18.2696	1418.81	15.9926	1425.75	18.8574	1429.92	15.6217	1730.09	18.3908
1267.41	37.1911	1072.81	15.8432	1064.94	18.6966	1085.1	19.8091	1438.5	11.848	1447.55	12.0823	1410.24	11.4319	1499.17	13.907	1438.77	14.384	1380.99	13.2686	1425.99	9.97285	1819.25	23.4248	1731.27	11.3359	1439.45	20.4723	1716.05	12.7453	1424.58	15.5357	1653.56	13.3545	1679.56	11.947	1705.46	12.739	1688.39	11.4096	1426.37	13.8926	1419.38	13.7789	1425.81	15.717	1431.74	11.7504	1730.68	14.1897
1286.19	43.1409	1073.73	17.1245	1065.44	18.4533	1085.2	24.3057	1438.73	12.4152	1447.69	14.604	1418.37	23.6157	928.273	10.535	1439.35	15.8962	1390.9	15.7622	1426.45	12.2151	1873.41	12.9972	1734.05	9.65638	1440.98	16.5195	1889.06	31.7059	1450.63	18.7029	1774.28	16.0069	1679.89	12.8502	1707.05	7.72366	1688.57	9.99973	1427.09	18.2524	1419.39	19.0931	1425.85	18.7401	1432.08	14.49	1761.1	16.2629
1359.13	34.6916	1073.78	17.2555	1065.64	23.0541	1085.22	18.025	1439.44	16.4661	1447.72	13.747	1429.16	44.6581	1792.8	8.23866	1439.78	15.2098	1400.29	11.8439	1427.59	9.65459	2243.64	13.3259	1734.87	14.8088	1452.19	22.1523	1755.64	14.3994	1455.09	16.6467	1655.35	14.7455	1680.23	16.5449	1707.29	9.80862	1688.62	15.2037	1427.42	17.4683	1419.81	14.7296	1426.41	16.0199	1433.48	14.5588	1858.17	16.8715
1370.1	51.4119	1073.81	16.5989	1065.94	21.0469	1086.16	16.6754	1441.57	12.7172	1448.64	13.9112	1429.68	13.4773	1332.87	10.6463	1440.97	11.1058	1402.61	10.671	1427.68	9.86592	2446.3	13.5527	1739.56	9.46283	1455.75	17.9938	1707.84	13.8528	1458.26	11.5821	1707.26	13.8288	1680.42	15.7689	1707.58	13.449	1688.63	11.3706	1428.14	16.3106	1420.08	16.639	1426.6	16.4789	1433.69	14.8331	1901.44	62.9925
1380.54	32.0428	1075.21	16.5931	1066.03	23.7019	1087.24	19.5088	1443.04	13.3256	1450.26	17.5511	1430.01	16.8782	1825.76	10.356	1440.99	14.0194	1426.81	15.7754	1429.47	16.655	2595.43	11.3042	1740.68	13.0878	1468.56	20.3036	2589.07	10.7055	1463.65	18.5187	2695.2	12.3796	1681.33	14.7148	1707.71	9.75054	1689.1	34.7407	1429.27	16.5536	1420.4	13.4593	1428.02	17.6188	1433.79	13.2395	1964.88	13.7922
1387.11	57.8271	1076.71	22.6917	1066.22	15.6526	1087.28	20.4601	1445.62	11.2823	1452.25	16.5977	1430.22	19.6077	1013.07	15.8823	1441.62	14.4069	1434.57	13.279	1429.66	12.262			1741.83	12.9453	1478.77	25.1378	1719.36	12.0117	1479.86	14.6367	1581.71	24.3769	1681.5	12.9267	1708.17	10.3326	1689.84	12.9529	1429.69	13.8127	1420.63	15.9572	1428.29	18.3465	1434.18	11.8877
1402.33	46.8075	1077.38	17.7836	1066.27	22.6282	1087.47	22.1066	1447.19	13.6178	1459.36	20.5233	1438.62	20.5701	1055.91	12.338	1442.98	17.9498	1435.42	19.0873	1430.23	12.7012			1744.21	9.64976	1480.51	19.5301	1775.61	12.7186	1491.28	16.4441	1695.34	15.4517	1681.52	14.0212	1709.49	12.3038	1689.86	13.2658	1431.57	19.4237	1420.7	17.369	1429.08	16.9931	1434.43	12.4719
1414.14	48.3892	1078.73	15.8119	1066.48	22.544	1089.05	21.8241	1448.81	13.8996	1474.1	15.4029	1441.76	20.6591	1155.42	9.21024	1444.66	17.466	1437.88	11.4549	1431.98	14.757			1746.74	13.2385	1499.77	24.0878	1716.41	9.07216	1497.22	14.7537	1692.68	10.6066	1682.02	15.3362	1709.91	10.2494	1689.89	12.6691	1433.68	15.1978	1420.73	20.1985	1429.54	16.306	1434.76	11.2337
1421.01	45.75	1079.74	18.8943	1067.72	19.8124	1089.6	16.5774	1487.59	12.7698	1477.66	11.8913	1457.43	12.2581	1247.41	10.8075	1444.67	14.0933	1438.53	13.5457	1431.99	11.7199			1747.65	14.1126	1561.99	22.2543	1739.65	11.0308	1509.06	20.2229	1519.14	18.9321	1682.4	17.493	1710.01	11.3649	1690.11	12.0047	1433.73	19.0515	1421.02	14.6722	1430.07	19.8125	1435.73	12.4704
1444.28	37.6608	1080.84	19.6114	1067.77	16.7214	1089.95	16.1211	1623.17	14.7723	1480.9	15.4687	1462.08	14.5493	1637.87	8.56496	1444.77	15.3797	1439.06	12.7547	1432.5	14.5401			1749.4	11.4052	1644.96	21.2646	1719.47	14.5007	1585.19	16.7806	1643.07	12.7659	1683.91	14.8583	1710.12	11.4341	1690.19	12.08	1434.74	21.5332	1421.3	18.783	1431.15	14.411	1436.54	14.5971
1475.21	23.9647	1080.93	20.3349	1070.13	22.3035	1090.88	24.2589	1643.38	10.3781	1513.83	18.8855	1465.29	20.9092	1078.79	13.5895	1445.13	15.09	1440.98	11.323	1432.62	15.664			1750.34	12.0554	1672.73	19.8762	1694.82	14.6364	1610.63	18.3972	1719.98	16.5953	1684.14	14.4973	1713.25	12.0079	1690.47	14.9728	1435.57	16.2913	1421.61	11.0956	1432.56	18.073	1436.67	15.5414
1494.43	30.109	1081.34	18.5983	1070.22	24.1057	1091	16.9754	1647.18	14.187	1533.2	23.3407	1477.55	14.1636	1650.32	11.9738	1447.47	14.6943	1445.43	13.2384	1432.87	14.755			1751.05	11.6725	1673.93	20.1713	1751.91	15.0899	1613.15	14.2251	1676.18	11.9018	1684.62	12.2354	1714.41	11.1252	1690.66	12.7305	1435.59	15.3807	1422.35	13.012	1433.73	18.8772	1438.27	17.2827
1540.3	32.099	1081.54	25.924	1070.42	18.6524	1092.21	16.7073	1658.28	13.5392	1580.47	15.1643	1493.51	21.58	1743.75	10.0354	1447.65	13.8256	1446.85	12.5505	1433.34	12.5342			1753.48	12.9648	1683.82	20.6452	1711.21	16.5043	1624.52	16.027	1768.98	15.2633	1684.62	14.3144	1715.26	13.0863	1690.73	14.129	1436.37	13.2484	1422.84	16.7227	1433.88	15.9187	1438.62	10.2126
1547.27	32.7416	1081.84	11.4298	1070.94	18.4864	1092.22	25.3247	1658.77	13.6826	1600.29	16.1846	1496.69	14.6746	1865.43	10.8651	1453.5	15.4595	1449.36	11.0599	1434.58	18.5689			1759.32	13.9973	1684.32	19.6884	1509.62	16.1913	1651.47	53.7002	1660.37	14.0115	1686.01	15.374	1715.31	10.6554	1691.14	11.9875	1436.47	14.7143	1423.22	14.7273	1434.38	16.8132	1438.89	16.2246
1550.31	38.2533	1082.24	20.3724	1071.44	21.101	1092.29	20.4774	1660.27	12.0019	1617.29	14.8521	1499.64	16.6669	1615.62	8.23705	1454.45	17.0334	1449.59	9.79553	1441.35	13.5317			1761.78	11.4441	1686.11	17.7568	1718.44	9.90899	1656.32	12.6984	1437.64	27.0948	1686.08	12.1525	1715.52	7.69223	1691.21	11.99	1436.85	14.3846	1423.94	14.7422	1434.43	16.34	1440.93	15.293
1556.18	18.2535	1084.7	19.0555	1072.91	20.343	1092.92	21.4368	1668.56	14.508	1627.34	14.3135	1527.28	12.9056	1403.1	12.7295	1456.13	17.0571	1449.91	14.0317	1441.49	10.9351			1762.9	12.8969	1687.52	20.9126	1719.63	12.2815	1661.6	14.5932	1847.88	10.1769	1686.33	14.8913	1715.88	11.4747	1691.33	10.6801	1437.01	15.4248	1424.11	20.4255	1435.89	18.4172	1443.37	13.5669
1560.03	30.958	1084.74	22.0312	1074.04	25.0698	1094.28	22.3814	1671.9	15.077	1629.31	14.8259	1541.8	17.512	1829.82	12.0815	1461.11	13.6643	1452.87	15.6867	1443.77	13.6828			1764.59	13.3377	1688.14	19.4889	1720.25	11.3019	1666.41	13.7506	1788.53	10.6749	1687.52	12.8205	1716.65	10.7471	1692.4	11.9139	1437.06	15.3456	1424.5	18.0536	1435.91	21.6182	1443.72	11.684
1562.78	35.1397	1085.11	22.7319	1074.77	24.8343	1095.04	22.0967	1671.92	12.8368	1633.48	13.2915	1552.54	22.2423	1091.86	13.6923	1466.48	14.7706	1453.48	10.9391	1445.25	13.8392			1767.11	13.1137	1688.53	19.5724	1656.03	13.139	1667.84	10.3122	3567.82	9.1868	1687.72	13.1188	1717.26	13.026	1692.7	16.0699	1437.32	20.0823	1424.78	18.7389	1436.23	16.669	1443.85	14.7314
1620.79	36.6025	1085.47	24.2728	1074.8	25.4928	1096.19	21.5382	1675.12	9.37584	1638.7	15.05	1578.23	14.659	1126.95	10.9097	1487.1	13.9065	1462.96	13.4956	1445.46	11.5437			1770.1	17.0072	1689.6	20.9529	1769.82	12.4332	1681.77	14.3988	1177.54	26.562	1687.8	11.5911	1718.15	8.80591	1693.11	15.2134	1438.52	17.1343	1425.4	17.0576	1437.11	15.7106	1444.81	12.191
1625.24	38.5233	1087.3	19.1306	1074.81	14.2496	1096.63	19.6241	1680.42	12.2581	1645.15	9.89781	1578.37	14.036	1056.38	36.8403	1496.63	14.4297	1463.84	10.9368	1448.77	14.4715			1772.64	12.2979	1690.54	20.9609	1702.47	10.5958	1696.32	14.8501	1630.11	12.6135	1687.91	14.6666	1718.73	9.13705	1693.44	12.9929	1438.82	17.7089	1425.47	20.5198	1439.99	20.5245	1444.85	14.1832
1642.83	49.644	1087.41	17.6375	1075.24	26.1258	1096.72	18.2986	1684.71	13.6234	1646.48	13.9532	1588.56	14.7585	920.561	9.43036	1503.69	14.9996	1464.09	15.138	1449.47	14.9859			1773.79	13.711	1696.42	21.0276	1746.01	12.0639	1697.68	16.6964	2795.68	11.8842	1688.29	14.526	1720.02	10.2884	1693.85	12.3202	1439.62	12.6272	1426.52	19.5745	1441.59	15.3928	1445.06	19.4171
1643.93	22.5682	1087.9	20.3101	1076.1	22.0592	1098.1	21.0198	1686.21	11.6168	1655.55	13.4925	1589.5	16.4754	1957.84	9.14963	1584.61	32.6384	1484.33	14.8391	1453	19.3804			1785.4	13.5353	1697.95	23.124	1736.94	14.7156	1698.13	16.723	1962.13	13.4204	1688.36	12.6957	1720.29	9.05753	1694.15	15.4307	1441.76	16.5635	1427.18	16.8909	1442.95	19.44	1445.93	19.4864
1653.42	55.7767	1088.04	24.7905	1076.48	18.5709	1098.11	18.6856	1686.36	12.2348	1663.29	11.6433	1590.39	22.0693	1810.32	9.99172	1664.22	13.686	1497.68	12.9245	1454.7	9.86074			1802.1	10.7917	1699.61	19.7842	1708.57	12.5318	1710.47	15.6476	1633.5	12.2003	1688.54	14.8032	1721.34	13.9506	1696.75	11.2367	1442.33	15.9311	1427.19	20.9096	1444.27	16.8446	1446.23	14.4165
1662.34	50.6771	1088.88	21.3931	1077.23	20.0979	1098.48	17.8275	1690.63	13.877	1667.12	10.1436	1595.95	16.5607	1714.96	9.97799	1666.54	16.6817	1498.35	14.3244	1456.69	12.4005			1807.49	9.36264	1700.27	19.2997	2764.48	11.829	1726.59	15.3116	1400.71	22.3268	1689.14	18.0943	1721.63	12.6064	1696.9	10.023	1442.58	15.8765	1430.24	15.2268	1446.35	16.6292	1446.71	12.4307
1666.77	54.8287	1088.93	25.1413	1078.28	22.3139	1098.78	13.1666	1692.43	15.5982	1668.8	11.5071	1614.85	19.9326	777.592	50.9035	1669.14	15.3834	1501.17	15.5468	1459.12	12.7215			1811.44	15.9609	1701.01	17.0383	1136.21	10.6339	1735.37	16.1018	1790.03	15.743	1689.3	16.4401	1722.99	9.59857	1696.91	14.5765	1443.15	15.8925	1430.71	17.2312	1446.42	19.5713	1448.07	17.1706
1675.21	64.4637	1088.98	23.9491	1078.89	18.9396	1099.15	18.5148	1693.24	12.6907	1672.99	15.6179	1615.03	10.6212	1741.61	9.66191	1682.81	14.4875	1503.59	12.2361	1466.28	17.2989			1815.36	12.2446	1701.19	16.8355	1897.42	15.5367	1740.5	16.8904	1163.38	14.103	1689.39	12.608	1723.28	9.1662	1698.24	14.0163	1443.18	17.5197	1431.68	14.9338	1450.28	18.7511	1448.74	17.4073
1676.06	26.0423	1089.22	22.8277	1078.99	15.369	1099.33	17.1012	1698.83	13.3828	1674.68	9.9865	1616.91	15.1626	1651.62	9.317	1684.39	14.7995	1504.57	18.127	1636.33	15.08			1819.74	11.9714	1701.22	22.9095	1747.98	13.0074	1741.2	13.5584	1814.29	11.4989	1690.03	16.1416	1723.89	9.53635	1698.61	11.2215	1443.19	17.2987	1434.46	13.4528	1450.74	17.4112	1448.94	12.602
1685.05	40.1815	1089.81	16.0946	1079.55	21.9322	1101.51	20.4875	1704.66	10.8402	1675.51	14.1228	1623.91	15.9589	1186.44	11.5222	1684.48	12.6974	1509.95	11.9781	1660.47	13.0552			1824.41	12.3528	1701.3	22.0588	1715.65	14.2702	1749.32	15.4026	1778.76	15.0992	1690.31	14.4588	1724.08	10.8104	1699.47	11.0083	1443.34	22.1023	1434.48	17.4152	1450.83	17.8237	1449.13	14.7552
1691.66	47.1346	1090.03	20.4192	1080.38	17.5231	1104.12	19.2376	1705.3	12.6234	1681.19	12.0191	1625.7	17.4018	2828.14	11.2281	1686.84	11.555	1518.68	16.4857	1675.98	9.3922			1828.11	10.039	1701.39	19.2742	1839.7	11.9524	1753.32	17.6531	1263.52	13.2321	1690.39	10.3966	1724.31	8.71766	1699.87	12.5413	1444.1	16.5151	1435.05	15.5194	1451.15	19.413	1449.43	15.2707
1705.64	40.6746	1090.06	25.2607	1081.02	16.5191	1104.74	18.446	1706.1	11.5978	1681.37	11.4568	1628.28	16.0597	1077.35	15.6836	1687.07	12.504	1530.77	12.2048	1676.7	15.7646			1834.43	15.2701	1702.34	19.3892	1697.16	9.57984	1753.38	15.7201	1572.02	15.1658	1690.61	14.139	1724.34	12.1059	1700.28	10.2801	1445.11	17.2696	1436.85	18.1058	1453.39	17.7414	1452.46	13.4299
1707.4	53.371	1090.97	18.6707	1083.34	17.6759	1105.74	17.3829	1708.82	11.9485	1684.96	15.1376	1645.33	14.7377	1648.84	8.20233	1688.25	13.7306	1554.87	17.5131	1681.81	9.55324			1842.7	14.7896	1703.38	18.1698	1730.25	13.7306	1755.18	13.185	1318.07	14.9964	1690.95	14.3767	1724.4	11.3208	1700.46	12.1936	1445.27	16.8051	1438.81	19.5074	1454.2	17.1363	1453.1	14.299
1707.84	39.6427	1092	19.5422	1083.6	16.554	1105.8	20.8014	1709.45	9.49143	1687.14	12.8712	1645.8	19.043	1953.65	8.77199	1689.51	11.6502	1568.62	13.4051	1682.16	16.8131			1845.09	10.9432	1705.86	20.1504	1739.68	15.2019	1760.6	14.8587	1378.09	12.8152	1691.45	17.7329	1724.91	9.50209	1700.79	9.9912	1445.41	20.9977	1439.23	14.8954	1454.23	15.4383	1455.24	18.2658
1711.02	35.7474	1092.64	19.2174	1083.78	20.0475	1106.47	16.1126	1710.1	11.403	1690.28	10.1152	1648.35	17.3627	1018.81	13.6093	1690.36	12.1412	1615	10.0839	1683.46	15.8648			1849.22	10.41	1706.2	19.6833	1742.23	10.2574	1770.33	14.6823			1691.46	13.7079	1727.35	8.03465	1701.17	10.9814	1446.07	19.2428	1439.59	14.1052	1458.02	18.3167	1455.5	17.9886
1715.08	40.1559	1092.78	23.0647	1085.01	18.5938	1107.87	26.5645	1712.73	9.56477	1691.19	11.8836	1650.62	13.256	1323.87	24.4177	1692.71	12.3348	1615.6	10.6948	1684.63	12.1407			1850.81	14.333	1707.89	18.0117	1723.42	9.76746	1798.2	16.2841			1691.53	17.1071	1728.19	17.8769	1701.2	14.0241	1448.06	18.6981	1439.94	16.1128	1556.1	17.8462	1457.97	12.1135
1725.36	20.4722	1093.22	18.1995	1085.06	20.7771	1108.45	27.3699	1713.21	11.0976	1695.17	12.7018	1653.6	17.0159	2613.34	9.2656	1693.07	12.9545	1622.48	12.6493	1685.03	14.1552			1860.63	12.8969	1709.74	19.4961	1717.14	14.2057	1798.81	16.4596			1691.93	13.3007	1728.39	10.3114	1701.36	14.3753	1448.55	17.9029	1443.36	19.4299	1650.37	23.1005	1458.84	12.4331
1749.78	38.3874	1093.44	14.4721	1085.14	17.4835	1110.42	20.4525	1714.62	9.46299	1696.5	10.9859	1655.22	14.8666	1627.51	8.07501	1694.82	14.773	1622.76	13.1885	1687.02	9.51844			1873.32	12.3141	1710.17	19.8641	1712.5	14.5045	1835.82	12.1834			1692.16	15.0768	1729.34	10.0181	1701.36	11.2835	1449.37	17.2489	1444.37	21.1819	1683.73	18.2436	1459.67	16.6138
1758.36	29.917	1094.98	17.7317	1085.18	21.7367	1111.15	21.0646	1714.65	11.4979	1697.22	15.4023	1658.47	13.8916	1825.47	10.3859	1697.76	10.9868	1624.83	13.4586	1689.34	12.2401			1948.88	11.984	1712.86	18.9066	2389.67	8.91653	1878.71	15.0062			1692.17	15.4249	1729.63	11.0919	1701.72	12.5147	1450.27	15.9399	1445.43	15.8597	1686.19	15.0265	1460.35	15.1288
1761.12	35.7046	1095.09	23.1936	1085.42	25.1492	1113.41	21.5254	1717.05	10.2066	1697.77	11.9291	1672.12	14.1059	1865.05	11.0487	1700	16.2352	1634.75	12.9219	1690.55	12.1238			2030.83	11.7126	1714.16	19.2438	1723.98	11.2943	1908.93	16.5739			1692.28	12.8069	1730.95	13.5947	1701.98	17.1338	1450.29	17.3903	1452.56	24.2686	1694.09	17.2456	1463.5	13.2411
[truncated: 933 more rows]
[truncated: 106 more columns]

## Sheet: 3-Wolfcampian
AZ Shelf 3		MS07		OC2-8		OC56		HC01		SM01		TP01		JBO1		11CVC		11CT		2QZ-9		SY-C		SY-B		1PS-4		1WM-478		1WM-520		12-02-16-1		12-03-16-1		12-03-16-3		10-11-15-1		12-03-16-2		09-CM-676		OK-10-PO1		OK-4-WL		03PL12
[truncated: 1,768 more rows]
[truncated: 38 more columns]

## Sheet: 4-Leonardian-Guadalupian
Leary, R.J., Umhoefer, P., Smith, M.E., Smith, T.M., Saylor, J.E., Riggs, N., Burr, G., Lodes, E., Foley, D., Licht, A., Mueller, M.A., and Baird, C., 2020, Provenance of Pennsylvanian–Permian sedimentary rocks associated with the Ancestral Rocky Mountains orogeny in southwestern Laurentia: Implications for continental-scale Laurentian sediment transport systems: Lithosphere, https://doi.org/10.1…
[truncated: 1,727 more rows]
[truncated: 30 more columns]
