# Supplementary material
Source: publisher figshare collection journal article supplement (https://gsapubs.figshare.com/ndownloader/files/23319257)
Supplement: Supplementary file 1 [file 23319257 › FileDR5. DZnmf_sample groupings.xlsx]

## Sheet: Sheet1
Leary, R.J., Umhoefer, P., Smith, M.E., Smith, T.M., Saylor, J.E., Riggs, N., Burr, G., Lodes, E., Foley, D., Licht, A., Mueller, M.A., and Baird, C., 2020, Provenance of Pennsylvanian–Permian sedimentary rocks associated with the Ancestral Rocky Mountains orogeny in southwestern Laurentia: Implications for continental-scale Laurentian sediment transport systems: Lithosphere, https://doi.org/10.1…
Age Rank	Basin	Sample ID	n-value	merged groups (n-value)	Lat	Lon	Unit
0	Appalachian Basin	Princeton	96	278	37.3961	-81.1315	Princeton Fm
0	Appalachian Basin	Bluestone	91		37.7699	-81.0905	Bluestone Fm
0	Appalachian Basin	Hinton	91		37.7788	-80.8925	Hinton_fm
0	Appalachian Basin	Mauch_Chunk	95		40.0402	-78.1393	Mauch_Chunk_Fm
0	Appalachian Basin	KY-21-SG	310		37.1572	-82.6376	Stoney Gap
0	Arkoma Basin	Stanley	93	193	34.3231	-93.8448	Stanley Gp
0	Arkoma Basin	Hot_spring	100		34.5686	-93.0189	Hotspring Member, Stanley Gp
0	Central Colorado Trough/Eagle Basin	BC05	70		38.6585	-105.809	Leadville LS
0	Grand Canyon (Arizona Shelf)	Surprise Canyon 3 (06GC149)	84	378	36.596	-111.768	Surprise Canyon
0	Grand Canyon (Arizona Shelf)	Surprise_Cyn2	101		36.5869	-111.782	Surprise Canyon
0	Grand Canyon (Arizona Shelf)	Surprise Canyon Cngl	193		36.0263	-111.98	Surprise Canyon
0	Keeler Canyon Basin	09-CM-699	90		36.5154	-117.702	Mexican Spring Formation
0	Nevada Basins	Tonka	105		40.725	-116.021	Tonka_Fm
0	Wood River Basin	24PL09	89	325	44.3206	-114.55	Salmon_River_Assemblage
0	Wood River Basin	10JM94	41		43.6192	-113.867	Argosy_Creek_Fm
0	Wood River Basin	40JM94	41		43.6192	-113.867	Argosy_Creek_Fm
0	Wood River Basin	05PL15	105		43.8632	-114.261	Argosy_Creek_Fm
0	Wood River Basin	09LB04	49		43.8621	-114.308	Little_Cooper_Fm
1	Appalachian Basin	Tumbling Run	26	286	40.8477	-76.0547	Tumbling Run Mbr, Pottsville Fm
1	Appalachian Basin	Pottsville Fm	77		40.1145	-78.2182	Pottsville Fm
1	Appalachian Basin	OH-1-SS	183		39.012	-82.7394	Sharon
1	Appalachian Basin	Racoon	41	144	34.3451	-85.2968	Racoon Mt Fm
1	Appalachian Basin	Montevallo	62		33.0911	-86.9726	Montevallo Coal Zone, Pottsville Fm
1	Appalachian Basin	Sewanee	41		35.7161	-84.9243	Sewanee_Congl.
1	Appalachian Basin	KY-18-CB	319		38.2904	-83.0877	Corbin
1	Appalachian Basin	Pocohontas	61	393	37.2938	-81.2046	Pocohontas Fm
1	Appalachian Basin	Lee	58		36.9162	-82.6648	Lee Fm
1	Appalachian Basin	VA-1-GN	274		37.1235	-82.6112	Grundy Norton
1	Appalachian Basin	OH-4-SN	319		41.6663	-81.0395	Sharon
1	Appalachian Basin	OH-1-SS	183		39.012	-82.7394	Sharon
1	Arizona Shelf	1QZ19	288		33.62	-114.015	Basal Supai Fm
1	Arizona Shelf	SY-D	272	465	34.8847	-112.064	Manakacha
1	Grand Canyon (Arizona Shelf)	Watahomigi	93		36.0779	-112.092	Watamomigi, Supai Fm
1	Grand Canyon (Arizona Shelf)	Manakacha1	100		36.6421	-111.763	Manakacha, Supai Fm
1	Arkoma Basin	MB1-3	112	854	36.0334	-93.6724	Middle Boyd Sandstone
1	Arkoma Basin	MB2-4	105		35.9411	-93.2558	Middle Boyd Sandstone
1	Arkoma Basin	MB2-2	99		35.8754	-93.0457	Middle Boyd Sandstone
1	Arkoma Basin	MB2-3	101		35.724	-93.0249	Middle Boyd Sandstone
1	Arkoma Basin	MB2-5	110		36.0547	-93.3588	Middle Boyd Sandstone
1	Arkoma Basin	MB2-1	109		36.1778	-93.2071	Middle Boyd Sandstone
1	Arkoma Basin	MB1-2	107		35.997	-93.4211	Middle Boyd Sandstone
1	Arkoma Basin	MB1-1	111		35.9283	-93.3899	Middle Boyd Sandstone
1	Arkoma Basin	23	142	903	34.7583	-95.4468	Spiro Mbr, Atoka Fm
1	Arkoma Basin	38	143		34.8897	-95.3158	Spiro Mbr, Atoka Fm
1	Arkoma Basin	16	132		34.8591	-95.3549	Atoka Fm
1	Arkoma Basin	29	135		34.6265	-95.9258	Atoka Fm
1	Arkoma Basin	48	114		34.7569	-95.4373	Atoka Fm
1	Arkoma Basin	49	113		34.8842	-95.3183	Atoka Fm
1	Arkoma Basin	50	124		34.7607	-95.4355	Atoka Fm
1	Arkoma Basin	46-1	124	254	35.0049	-92.0705	Atoka Fm
1	Arkoma Basin	46-2	130		35.0048	-92.0707	Atoka Fm
1	Bighorn Basin	BCRA-01-10	84		45.042	-108.252	Amsden_Formation
1	Central Colorado Trough/Eagle Basin	BC01	70	277	38.6588	-105.808	Kerber Formation
1	Central Colorado Trough/Eagle Basin	BC02	106		38.6615	-105.805	Sharpsdale Fm
1	Central Colorado Trough/Eagle Basin	CC01	101		38.83	-106.854	Minturn and Belden (most likely Belden)
1	Denver Basin	MS11	96	192	38.8584	-104.924	Fountain
1	Denver Basin	MS10	96		38.8584	-104.924	Fountain
1	Denver Basin	MS01	100	194	38.8627	-104.915	Glen Eyrie
1	Denver Basin	MSGE313	94		38.8638	-104.916	Glen Eyrie
1	Forest City Basin	FCB_AD	259		40.613	-92.627	Kalo Fm
1	Forest City Basin	FCB_A2	267		40.613	-92.627	Kilbourn Fm
1	Forest City Basin	FCB_A1	294		41.6772	-91.5315	Kilbourn Fm
1	Fort Worth Basin	S3	283		31.1377	-98.5795	Big Saline Fm
1	Illinois Basin	IB_AD	81	430	40.4914	-90.3677	Upper Tradewater Fm
1	Illinois Basin	IB_M1	280		41.4342	-90.9403	Caseyville Fm
1	Illinois Basin	IB_M2	69		41.4638	-90.5708	Caseyville Fm
1	Paradox Basin	ML01	104	233	37.7506	-107.684	Molas
1	Paradox Basin	MP-DZ1	129		37.7423	-107.687	Molas
2	Anadarko Basin	OK-1-VN	344		34.4807	-97.0376	Vanoss Conglomerate
2	Anadarko Basin	OK-2-V2	306		34.4915	-97.035	Vanoss Conglomerate
2	Appalachian Basin	Cross_Mtn	37	321	36.5501	-83.8422	Cross_Mtn_Fm
2	Appalachian Basin	KY-19-PR7	284		38.3484	-82.6094	Princess No 7 coal
2	Arizona Shelf	DryCreek	60	357	34.9433	-111.8	Supai
2	Arizona Shelf	5PS-42	297		34.3686	-111.394	Naco
2	Arizona Shelf	5PS-58	300		34.3686	-111.394	Naco
2	Arizona Shelf	5PS-82	301		34.3692	-111.394	Naco
2	Bighorn Basin	07-CM-001	104	307	44.504	-109.136	Tensleep_Formation
2	Bighorn Basin	07-BC-001	100		45.021	-108.251	Tensleep_Formation
2	Bighorn Basin	07-BHU-001	103		44.871	-108.069	Tensleep_Formation
2	Canada	Spray_Lakes	198		50.8078	-115.274	Spray_Lakes_Gp
2	Central Colorado Trough/Eagle Basin	GS01	99	197	39.5317	-107.332	Eagle Valley Fm
2	Central Colorado Trough/Eagle Basin	GS09	98		39.5306	-107.336	Eagle Valley Fm
2	Central Colorado Trough/Eagle Basin	MC05	92	192	39.8847	-107.767	Minturn Fm
2	Central Colorado Trough/Eagle Basin	MC17	100		39.9144	-107.777	Minturn Fm
2	Central Colorado Trough/Eagle Basin	GS11	98	206	39.5037	-107.299	Maroon Fm
2	Central Colorado Trough/Eagle Basin	GS24	108		39.5059	-107.298	Maroon Fm
2	Central Colorado Trough/Eagle Basin	MC20	101		39.9145	-107.777	Maroon Fm
2	Central Colorado Trough/Eagle Basin	V10	62	379	39.5945	-106.338	Minturn Fm
2	Central Colorado Trough/Eagle Basin	V01	208		39.6058	-106.323	Minturn
2	Central Colorado Trough/Eagle Basin	V18	36		39.59	-106.342	Minturn Fm
2	Central Colorado Trough/Eagle Basin	V20	73		39.5859	-106.334	Minturn Fm
2	Central Colorado Trough/Eagle Basin	EC01	98	254	39.6656	-106.831	Eagle Valley Evaporite
2	Central Colorado Trough/Eagle Basin	RC01	83		39.6834	-106.773	Eagle Valley Fm
2	Central Colorado Trough/Eagle Basin	RC19	73		39.6877	-106.767	Eagle Valley Fm
2	Central Colorado Trough/Eagle Basin	V22	97	204	39.6486	-106.401	Maroon Fm
2	Central Colorado Trough/Eagle Basin	V25	107		39.65	-106.403	Maroon Fm
2	Central/Southern Arizona Basins	Pedreg	54	423	31.5	-110	Horquilla
2	Central/Southern Arizona Basins	1WM-302	179		31.7723	-110.385	Horquilla
2	Central/Southern Arizona Basins	1PL-534	190		33.1919	-110.662	Horquilla
2	Denver Basin	MS04	107	319	38.8511	-104.885	Upper Fountain
2	Denver Basin	MS05	104		38.8467	-104.89	Upper Fountain
2	Denver Basin	MS06	108		38.8462	-104.89	Upper Fountain
2	Forest City Basin	FCB_D1	296		41.3668	-92.9891	Floris Fm
2	Forest City Basin	FCB_D2	285		41.3893	-93.0341	Floris Fm
2	Forest City Basin	FCB_D3	279		42.3929	-94.0808	Floris Fm
2	Forest City Basin	FCB_D4	263		41.9828	-93.8933	Vertegris
2	Fort Worth Basin	S4	104	303	32.705	-98.0688	Grindstone Creek Fm. (Dobbs Valley)
2	Fort Worth Basin	S5	92		32.7554	-98.0562	Mineral Wells Fm (Brazos River)
2	Fort Worth Basin	S6	107		32.7828	-98.1802	Mineral Wells Fm (Lake Pinto)
2	Fort Worth Basin	S7	106	208	32.7679	-98.3125	Turkey Creek
2	Fort Worth Basin	S8	102		32.7529	-98.5197	Colony Creek Shale
2	Grand Canyon (Arizona Shelf)	B_Wescogame	100		36.6681	-111.74	Wescogame
2	Illinois Basin	IB_D1	258		41.4346	-90.942	Upper Tradewater Fm
2	Illinois Basin	IB_D3	91	420	41.1939	-88.903	Carbondale Fm
2	Illinois Basin	IB_D2	264		41.4686	-90.0808	Upper Tradewater Fm
2	Illinois Basin	IB_D4	65		40.6375	-89.6542	Shelburn Fm
2	Keeler Canyon Basin	KC-2	294		36.5229	-117.81	Keeler Canyon, lower Salt Tram member
2	Marathon Basin	Z1	76	158	30.2102	-103.187	Haymond Fm
2	Marathon Basin	Z4	82		30.4827	-102.852	Haymond Fm
2	Nevada Basins	Battle	101		39.7517	-115.85	Battle_Formation
2	Oquirrh Basin	UT62	104		40.054	-111.558	Oquirrh Sandstone
2	Paradox Basin	DMR01	106	424	37.6337	-107.814	Pinkerton Trail-Hermosa
2	Paradox Basin	LC01	108		37.715	-107.755	Honaker Trail
2	Paradox Basin	SP01	104		37.6199	-107.814	Pinkerton Trail-Hermosa
2	Paradox Basin	CF02	106		38.0234	-107.655	Hermosa
2	Paradox Basin	HT02	36	311	37.1838	-109.961	Paradox Fm
2	Paradox Basin	HT14	47		37.1889	-109.957	Paradox Fm
2	Paradox Basin	HT04	64		37.1881	-109.954	Lower Honaker Trail
2	Paradox Basin	HT24	61		37.1888	-109.952	Honaker Trail
2	Paradox Basin	HT20	103		37.1881	-109.954	Honaker Trail
2	Paradox Basin	KA03	99		38.4971	-109.652	Honaker Trail
2	Paradox Basin	MP-DZ2	151		37.7433	-107.688	Hermosa
2	Southwest Montana	quad1	169		45.4387	-112.565	Quadrant Formation
2	Wood River Basin	01PL12	89	273	43.4671	-114.2	Hailey Mmb; Wood River Fm
2	Wood River Basin	04TD10	95		43.7357	-114.194	Eagle Creek Mbr., Wood River Fm.
2	Wood River Basin	14TD10	89		43.7027	-114.194	Eagle Creek Mbr., Wood River Fm.
2	Wood River Basin	ECS-13-2	101		42.7414	-108.821	Tensleep Ss., Sinks Cyn., WY
2	Wood River Basin	ECS-13-4	105	205	40.9318	-109.775	Weber Ss., Sheep Ck., UT
2	Wood River Basin	ECS-13-5	100		40.8308	-108.735	Weber Ss., Irish Cyn., CO
3	Anadarko Basin	OK-10-PO1	328		34.7244	-98.4698	Post Oak Conglomerate
3	Anadarko Basin	OK-4-WL	329		34.3905	-97.4134	Wellington Fm
3	Appalachian Basin	Washington	82	158	40.9822	-81.7742	Washington Fm
3	Appalachian Basin	Greene	76		41.8548	-80.0992	Greeme Fm
3	Appalachian Basin	WV-1-PR	234		39.6953	-80.776	Proctor
3	Arizona Shelf	2QZ-9	302		33.6193	114.013	Upper Supai
3	Arizona Shelf	SY-B	281		34.8867	-112.055	Hermit
3	Arizona Shelf	1PS-4	297		34.3481	-111.132	Base Hermit
3	Arizona Shelf	SY-C	290		34.8856	-112.062	Lowest Esplanade
3	Canada	Kindle	195		58.8147	-125.022	Kindle FM
3	Central/Southern Arizona Basins	1WM-478	294		31.7711	-110.392	Middle Earp
3	Central/Southern Arizona Basins	1WM-520	293		31.7712	-110.392	Upper Earp
3	Denver Basin	MS07	102		38.8516	-104.877	Lyons (Ingleside of Sweet et al. 2015)
3	Denver Basin	OC2-8	120	240	40.763	-105.18	lower Ingleside
3	Denver Basin	OC56	120		40.7642	-105.177	upper Ingleside
3	Grand Canyon (Arizona Shelf)	Upper_Hermit	100	298	36.8074	-111.636	Hermit
3	Grand Canyon (Arizona Shelf)	Lower_Hermit	98		36.7354	-111.694	Hermit
3	Grand Canyon (Arizona Shelf)	Hermit	100		36.0632	-112.089	Hermit
3	Grand Canyon (Arizona Shelf)	Esplanade	100	300	36.7168	-111.709	Esplanade
3	Grand Canyon (Arizona Shelf)	06GC156	100		36.3469	-112.89	Esplanade
3	Grand Canyon (Arizona Shelf)	06GC155	100		36.2935	-112.893	Esplanade
3	Keeler Canyon Basin	12-02-16-1	110	696	36.7858	-118.066	Pla/b Coyote Springs Hill
3	Keeler Canyon Basin	12-03-16-1	114		36.7258	-118.039	Plc, Canyon N of Lucky Slim Mine
3	Keeler Canyon Basin	12-03-16-3	144		36.7225	-118.036	Plc, Lucky Slim Mine
3	Keeler Canyon Basin	10-11-15-1	123		36.8097	-118.11	Plc "Dead Duck Hill" @ Mazurka Canyon
3	Keeler Canyon Basin	12-03-16-2	117		36.7253	-118.04	Pld, Canyon N of Lucky Slim Mine
3	Keeler Canyon Basin	09-C19-676	88		36.494	-117.687	Owens Valley Group, sedimentary rocks of Santa Rosa Flat, unit 2
3	Oquirrh Basin	UT1	84		40.0522	-111.552	Diamond Creek Sandstone
3	Paradox Basin	HC01	98	203	37.366	-107.838	Cutler
3	Paradox Basin	SM01	105		38.0555	-107.686	Cutler
3	Paradox Basin	TP01	110	219	38.7328	-109.013	Cutler
3	Paradox Basin	JBO1	109		38.6609	-108.981	Cutler
3	Paradox Basin	11CVC	100	198	38.6627	-109.435	Cutler underferientiated
3	Paradox Basin	11CT	98		38.6451	-109.366	Cutler underferientiated
3	Sonora Margin	Santa_Terresa	203		28.9883	-110.807	Sierra Santa Terresa
3	Sonora Margin	Mima_Mexico	205		28.9219	-109.945	Mima Mexico
3	Wood River Basin	03PL12	73		43.4325	-114.115	Wilson Creek Member, Wood River Fm.
4	Arizona Shelf	2QZ-272	276		33.6189	114.01	Coconino SS
4	Arizona Shelf	SY-A	290		34.8875	-112.053	Schnebly Hill
4	Arizona Shelf	3PS-100	235		34.3644	-111.138	Schnebly Hill
4	Arizona Shelf	4PS-186	302		34.3711	-111.143	top Schebly Hill
4	Bighorn Basin	HB-01-10	97	196	44.959	-108.252	Goose_Egg_Fm
4	Bighorn Basin	HB-02-10	99		44.959	-108.252	Goose_Egg_Fm
4	Central/Southern Arizona Basins	Prv	143		31.6983	-110.499	Rain Valley
4	Central/Southern Arizona Basins	pk0125151	103		33.8516	-115.037	Kaibab
4	Delaware Basin	JCT-4946	76	469	31.3046	-103.146	Bell Canyon Fm
4	Delaware Basin	CC-I	148		31.3046	-103.146	Cherry Canyon Fm
4	Delaware Basin	CC-II	82		31.3046	-103.146	Cherry Canyon Fm
4	Delaware Basin	CC-III	163		31.3046	-103.146	Cherry Canyon Fm
4	Delaware Basin	BrushCn	204		32.0212	-104.047	Brushy Canyon Fm
4	Delaware Basin	Rader	90	270	31.9316	-104.731	Bell Canyon Fm
4	Delaware Basin	Yates	89		32.2826	-104.364	Bell Canyon Fm
4	Delaware Basin	Brushy	91		31.8483	-104.84	Brushy Canyon Fm
4	Denver Basin	CO-PR-2-0	120		40.8546	-105.17	Lyons
4	Grand Canyon (Arizona Shelf)	Kaibab2	103	207	36.8527	-111.607	Kaibab Fm
4	Grand Canyon (Arizona Shelf)	Kaibab	104		36.0437	-111.825	Kaibab Fm
4	Grand Canyon (Arizona Shelf)	Toroweap1	97	198	36.0579	-112.146	Toroweap Fm
4	Grand Canyon (Arizona Shelf)	Toroweap2	101		36.0584	-112.085	Toroweap Fm
4	Grand Canyon (Arizona Shelf)	Coconino2	105	207	36.8238	-111.628	Coconino Fm
4	Grand Canyon (Arizona Shelf)	Coconino1	102		36.0593	-112.144	Coconino Fm
4	Keeler Canyon Basin	10-12-15-3	192	492	36.4852	-117.736	Ps11, near "CM Area 4"
4	Keeler Canyon Basin	6-20-17-3	137		36.5159	-117.733	Ps12a "CM Area 1"
4	Keeler Canyon Basin	6-20-17-4	163		36.5161	-117.733	Ps12a "CM Area 1"
4	Paradox Basin	12CV50	88	357	38.663	109.437	Basal Castle Valley
4	Paradox Basin	10CVG	86		38.6653	109.436	Lower Castle Valley
4	Paradox Basin	10CVR	90		38.6643	109.436	Lower Castle Valley
4	Paradox Basin	10CVW	93		38.6644	109.437	Upper Castle Valley
4	Paradox Basin	11WRB	85	185	37.8894	-110.41	White Rim
4	Paradox Basin	11WRA	100		38.4603	-109.794	White Rim
4	Southwest Montana	PHOS	148		45.4552	-112.573	Phosphoria Formation
