# Supplementary material
Source: publisher figshare collection journal article supplement (https://gsapubs.figshare.com/ndownloader/files/23319257)
Supplement: Supplementary file 1 [file 23319257 › FileDR6. Individual DZ Similarity Statistics.xlsx]

## Sheet: 0-Mississippian
pdp_x	AZShelf0	BC05	06GC149	Surprise_Cyn2	SurpriseC_Cngl	Princeton	Bluestone	24PL09	10JM94	40JM94	05PL15	09LB04	Hinton	Mauch_Chunk	KY-21-SG	Tonka	Stanley	Hot_spring	09-CM-699	O_M source	Central_App_Crys	N_Appalachian	NW_Arctic	NE_Arctic	Sonora
AZShelf0	1	0.1298	0.4531	0.8706	0.9555	0.7294	0.7362	0.00028009	0.0073	0.00096852	0.00024349	0.0048	0.6813	0.7309	0.8514	0.00021794	0.1059	0.6945	0.6057	0.5881	0.7547	0.326	0.136	0.3959	0.1931
BC05	0.1298	1	0.3273	0.0342	0.0827	0.0041	0.0116	0.0262	0.2352	0.2166	0.1248	0.2444	0.0215	0.0148	0.0577	0.1442	0.0032	0.0135	0.0154	0.0621	0.0206	0.0038	0.1295	0.1236	0.3485
06GC149	0.4531	0.3273	1	0.1658	0.2835	0.1028	0.1019	0.00072632	0.0508	0.0366	0.0355	0.0896	0.144	0.1192	0.2853	0.0223	0.0227	0.1337	0.0974	0.0996	0.1029	0.033	0.1271	0.3418	0.3492
Surprise_Cyn2	0.8706	0.0342	0.1658	1	0.8793	0.8774	0.9043	0.0045	0.001	0.0062	0.0078	0.0029	0.6564	0.8291	0.794	0.0048	0.1019	0.7062	0.6691	0.6767	0.9295	0.3368	0.0622	0.2247	0.057
SurpriseC_Cngl	0.9555	0.0827	0.2835	0.8793	1	0.7571	0.7558	6.5294e-06	0.0053	0.00024918	4.0688e-05	0.00039356	0.7512	0.7676	0.8557	8.2596e-07	0.1164	0.756	0.6488	0.6075	0.7754	0.3919	0.135	0.3697	0.1553
Princeton	0.7294	0.0041	0.1028	0.8774	0.7571	1	0.908	0.0115	0.01	0.0163	0.0132	0.0113	0.5696	0.8089	0.7197	0.0135	0.1956	0.7164	0.6257	0.6872	0.8768	0.217	0.0209	0.1418	0.017
Bluestone	0.7362	0.0116	0.1019	0.9043	0.7558	0.908	1	0.0082	0.0061	0.0122	0.0111	0.0106	0.5883	0.7842	0.7076	0.0101	0.1048	0.6945	0.5375	0.7591	0.9524	0.1896	0.0199	0.1361	0.0363
24PL09	0.00028009	0.0262	0.00072632	0.0045	6.5294e-06	0.0115	0.0082	1	0.6048	0.6264	0.4398	0.4218	1.6275e-05	0.0134	0.0019	0.7358	0.0019	0.0061	0.0082	0.007	0.0111	0.002	0.4275	0.1135	0.2286
10JM94	0.0073	0.2352	0.0508	0.001	0.0053	0.01	0.0061	0.6048	1	0.8838	0.537	0.6079	0.0011	0.0077	5.7441e-05	0.7903	0.00015798	0.0029	0.0049	0.007	0.0076	0.00028366	0.5006	0.1443	0.3127
40JM94	0.00096852	0.2166	0.0366	0.0062	0.00024918	0.0163	0.0122	0.6264	0.8838	1	0.6413	0.6766	1.9673e-05	0.0172	0.00079972	0.8243	6.9429e-05	0.0064	0.0121	0.0121	0.0143	0.0015	0.5324	0.1485	0.2776
05PL15	0.00024349	0.1248	0.0355	0.0078	4.0688e-05	0.0132	0.0111	0.4398	0.537	0.6413	1	0.5241	7.9005e-06	0.0162	0.0015	0.6141	0.00022766	0.0068	0.0102	0.0055	0.0124	0.0017	0.5227	0.1243	0.1599
09LB04	0.0048	0.2444	0.0896	0.0029	0.00039356	0.0113	0.0106	0.4218	0.6079	0.6766	0.5241	1	4.5642e-06	0.0138	1.1828e-05	0.7271	8.5594e-05	0.0041	0.0103	0.0052	0.0108	0.00089767	0.4643	0.2254	0.2297
Hinton	0.6813	0.0215	0.144	0.6564	0.7512	0.5696	0.5883	1.6275e-05	0.0011	1.9673e-05	7.9005e-06	4.5642e-06	1	0.6221	0.8182	1.6102e-05	0.0718	0.7813	0.5113	0.5237	0.5713	0.4424	0.1439	0.3659	0.1079
Mauch_Chunk	0.7309	0.0148	0.1192	0.8291	0.7676	0.8089	0.7842	0.0134	0.0077	0.0172	0.0162	0.0138	0.6221	1	0.744	0.0154	0.1109	0.6641	0.7809	0.6035	0.8062	0.2545	0.0536	0.2007	0.0299
KY-21-SG	0.8514	0.0577	0.2853	0.794	0.8557	0.7197	0.7076	0.0019	5.7441e-05	0.00079972	0.0015	1.1828e-05	0.8182	0.744	1	0.0009637	0.0928	0.8214	0.6564	0.6197	0.7047	0.3949	0.1246	0.3681	0.1577
Tonka	0.00021794	0.1442	0.0223	0.0048	8.2596e-07	0.0135	0.0101	0.7358	0.7903	0.8243	0.6141	0.7271	1.6102e-05	0.0154	0.0009637	1	0.00056683	0.0068	0.0117	0.0052	0.0122	0.0015	0.5621	0.1723	0.2494
Stanley	0.1059	0.0032	0.0227	0.1019	0.1164	0.1956	0.1048	0.0019	0.00015798	6.9429e-05	0.00022766	8.5594e-05	0.0718	0.1109	0.0928	0.00056683	1	0.1356	0.1438	0.0685	0.0921	0.0705	0.0227	0.1944	0.0049
Hot_spring	0.6945	0.0135	0.1337	0.7062	0.756	0.7164	0.6945	0.0061	0.0029	0.0064	0.0068	0.0041	0.7813	0.6641	0.8214	0.0068	0.1356	1	0.5374	0.6635	0.6377	0.4207	0.0613	0.234	0.0487
09-CM-699	0.6057	0.0154	0.0974	0.6691	0.6488	0.6257	0.5375	0.0082	0.0049	0.0121	0.0102	0.0103	0.5113	0.7809	0.6564	0.0117	0.1438	0.5374	1	0.3948	0.6057	0.4342	0.1154	0.2516	0.0167
O_M source	0.5881	0.0621	0.0996	0.6767	0.6075	0.6872	0.7591	0.007	0.007	0.0121	0.0055	0.0052	0.5237	0.6035	0.6197	0.0052	0.0685	0.6635	0.3948	1	0.7307	0.1343	0.0182	0.1256	0.0745
Central_App_Crys	0.7547	0.0206	0.1029	0.9295	0.7754	0.8768	0.9524	0.0111	0.0076	0.0143	0.0124	0.0108	0.5713	0.8062	0.7047	0.0122	0.0921	0.6377	0.6057	0.7307	1	0.238	0.0284	0.1578	0.0371
N_Appalachian	0.326	0.0038	0.033	0.3368	0.3919	0.217	0.1896	0.002	0.00028366	0.0015	0.0017	0.00089767	0.4424	0.2545	0.3949	0.0015	0.0705	0.4207	0.4342	0.1343	0.238	1	0.1411	0.2396	0.0037
NW_Arctic	0.136	0.1295	0.1271	0.0622	0.135	0.0209	0.0199	0.4275	0.5006	0.5324	0.5227	0.4643	0.1439	0.0536	0.1246	0.5621	0.0227	0.0613	0.1154	0.0182	0.0284	0.1411	1	0.5671	0.2745
NE_Arctic	0.3959	0.1236	0.3418	0.2247	0.3697	0.1418	0.1361	0.1135	0.1443	0.1485	0.1243	0.2254	0.3659	0.2007	0.3681	0.1723	0.1944	0.234	0.2516	0.1256	0.1578	0.2396	0.5671	1	0.2617
Sonora	0.1931	0.3485	0.3492	0.057	0.1553	0.017	0.0363	0.2286	0.3127	0.2776	0.1599	0.2297	0.1079	0.0299	0.1577	0.2494	0.0049	0.0487	0.0167	0.0745	0.0371	0.0037	0.2745	0.2617	1
KS	AZShelf0	BC05	06GC149	Surprise_Cyn2	SurpriseC_Cngl	Princeton	Bluestone	24PL09	10JM94	40JM94	05PL15	09LB04	Hinton	Mauch_Chunk	KY-21-SG	Tonka	Stanley	Hot_spring		O_M source	Central_App_Crys	N_Appalachian	NW_Arctic	NE_Arctic	Sonora
AZShelf0	0	0.4963	0.2982	0.1529	0.0601	0.2811	0.2503	0.8528	0.7843	0.8549	0.8358	0.7917	0.084	0.2432	0.0551	0.83	0.406	0.1602	0.2104	0.1636	0.2239	0.3038	0.4177	0.2221	0.4536
BC05	0.4963	0	0.2176	0.6426	0.5425	0.7542	0.7132	0.8581	0.6519	0.731	0.7238	0.6327	0.5022	0.6917	0.5097	0.7429	0.6814	0.6071	0.6556	0.541	0.6858	0.6628	0.3976	0.327	0.3454
06GC149	0.2982	0.2176	0	0.4373	0.3575	0.5547	0.5317	0.7556	0.6554	0.7176	0.7031	0.6831	0.3281	0.5335	0.3163	0.7098	0.5327	0.4402	0.498	0.4482	0.5146	0.4469	0.3099	0.1585	0.2572
Surprise_Cyn2	0.1529	0.6426	0.4373	0	0.1077	0.1862	0.1146	0.8983	0.8766	0.9208	0.9017	0.8701	0.1964	0.1079	0.1738	0.8827	0.4326	0.1098	0.2022	0.1719	0.0898	0.3143	0.4967	0.3638	0.5967
SurpriseC_Cngl	0.0601	0.5425	0.3575	0.1077	0	0.2326	0.2043	0.873	0.8128	0.8808	0.8618	0.8147	0.1061	0.1864	0.0836	0.8583	0.3875	0.1087	0.1561	0.1782	0.1745	0.2723	0.4429	0.2705	0.4987
Princeton	0.2811	0.7542	0.5547	0.1862	0.2326	0	0.1258	0.9671	0.9652	0.9896	0.9705	0.9488	0.2957	0.1354	0.2703	0.9515	0.4284	0.1768	0.2083	0.2727	0.145	0.3278	0.5988	0.455	0.7181
Bluestone	0.2503	0.7132	0.5317	0.1146	0.2043	0.1258	0	0.9556	0.9426	0.978	0.959	0.9466	0.2786	0.1534	0.2709	0.9399	0.4887	0.1304	0.256	0.2386	0.0814	0.3545	0.5971	0.4573	0.6905
24PL09	0.8528	0.8581	0.7556	0.8983	0.873	0.9671	0.9556	0	0.3628	0.2233	0.1914	0.2438	0.7947	0.9671	0.834	0.1612	0.7493	0.9068	0.9442	0.8687	0.9428	0.862	0.4663	0.6461	0.5173
10JM94	0.7843	0.6519	0.6554	0.8766	0.8128	0.9652	0.9426	0.3628	0	0.2195	0.4037	0.2295	0.7498	0.9548	0.772	0.2704	0.75	0.8746	0.9312	0.8585	0.9326	0.836	0.3861	0.5699	0.4158
40JM94	0.8549	0.731	0.7176	0.9208	0.8808	0.9896	0.978	0.2233	0.2195	0	0.1854	0.1294	0.8172	0.9896	0.8419	0.1173	0.7717	0.9293	0.9556	0.8898	0.9642	0.8722	0.4439	0.6403	0.4821
05PL15	0.8358	0.7238	0.7031	0.9017	0.8618	0.9705	0.959	0.1914	0.4037	0.1854	0	0.1986	0.7982	0.9705	0.8229	0.1619	0.7527	0.9102	0.9365	0.8708	0.9444	0.8531	0.4249	0.6186	0.466
09LB04	0.7917	0.6327	0.6831	0.8701	0.8147	0.9488	0.9466	0.2438	0.2295	0.1294	0.1986	0	0.7441	0.9588	0.7753	0.1714	0.75	0.8786	0.924	0.8569	0.9321	0.8358	0.3877	0.5777	0.4377
Hinton	0.084	0.5022	0.3281	0.1964	0.1061	0.2957	0.2786	0.7947	0.7498	0.8172	0.7982	0.7441	0	0.2601	0.0538	0.7791	0.3935	0.1623	0.2333	0.1925	0.2511	0.337	0.3745	0.2176	0.4785
Mauch_Chunk	0.2432	0.6917	0.5335	0.1079	0.1864	0.1354	0.1534	0.9671	0.9548	0.9896	0.9705	0.9588	0.2601	0	0.2365	0.9515	0.3546	0.1092	0.1326	0.209	0.1134	0.2575	0.5833	0.4364	0.6754
KY-21-SG	0.0551	0.5097	0.3163	0.1738	0.0836	0.2703	0.2709	0.834	0.772	0.8419	0.8229	0.7753	0.0538	0.2365	0	0.8135	0.3971	0.1476	0.2065	0.1766	0.2289	0.317	0.4064	0.215	0.4689
Tonka	0.83	0.7429	0.7098	0.8827	0.8583	0.9515	0.9399	0.1612	0.2704	0.1173	0.1619	0.1714	0.7791	0.9515	0.8135	0	0.7336	0.8912	0.9286	0.8545	0.9272	0.8383	0.4178	0.615	0.4688
Stanley	0.406	0.6814	0.5327	0.4326	0.3875	0.4284	0.4887	0.7493	0.75	0.7717	0.7527	0.75	0.3935	0.3546	0.3971	0.7336	0	0.371	0.2333	0.5284	0.4359	0.2062	0.4889	0.3847	0.6571
Hot_spring	0.1602	0.6071	0.4402	0.1098	0.1087	0.1768	0.1304	0.9068	0.8746	0.9293	0.9102	0.8786	0.1623	0.1092	0.1476	0.8912	0.371	0	0.1616	0.1842	0.11	0.2908	0.4992	0.345	0.5877
09-CM-699	0.2104	0.6556	0.498	0.2022	0.1561	0.2083	0.256	0.9442	0.9312	0.9556	0.9365	0.924	0.2333	0.1326	0.2065	0.9286	0.2333	0.1616	0	0.3166	0.209	0.1459	0.5515	0.4087	0.6399
O_M source	0.1636	0.541	0.4482	0.1719	0.1782	0.2727	0.2386	0.8687	0.8585	0.8898	0.8708	0.8569	0.1925	0.209	0.1766	0.8545	0.5284	0.1842	0.3166	0	0.1908	0.4342	0.4964	0.3599	0.5993
Central_App_Crys	0.2239	0.6858	0.5146	0.0898	0.1745	0.145	0.0814	0.9428	0.9326	0.9642	0.9444	0.9321	0.2511	0.1134	0.2289	0.9272	0.4359	0.11	0.209	0.1908	0	0.3115	0.5645	0.42	0.6563
N_Appalachian	0.3038	0.6628	0.4469	0.3143	0.2723	0.3278	0.3545	0.862	0.836	0.8722	0.8531	0.8358	0.337	0.2575	0.317	0.8383	0.2062	0.2908	0.1459	0.4342	0.3115	0	0.4624	0.3449	0.6151
NW_Arctic	0.4177	0.3976	0.3099	0.4967	0.4429	0.5988	0.5971	0.4663	0.3861	0.4439	0.4249	0.3877	0.3745	0.5833	0.4064	0.4178	0.4889	0.4992	0.5515	0.4964	0.5645	0.4624	0	0.1995	0.1745
NE_Arctic	0.2221	0.327	0.1585	0.3638	0.2705	0.455	0.4573	0.6461	0.5699	0.6403	0.6186	0.5777	0.2176	0.4364	0.215	0.615	0.3847	0.345	0.4087	0.3599	0.42	0.3449	0.1995	0	0.2833
Sonora	0.4536	0.3454	0.2572	0.5967	0.4987	0.7181	0.6905	0.5173	0.4158	0.4821	0.466	0.4377	0.4785	0.6754	0.4689	0.4688	0.6571	0.5877	0.6399	0.5993	0.6563	0.6151	0.1745	0.2833	0
kde_like	AZShelf0	BC05	06GC149	Surprise_Cyn2	SurpriseC_Cngl	Princeton	Bluestone	24PL09	10JM94	40JM94	05PL15	09LB04	Hinton	Mauch_Chunk	KY-21-SG	Tonka	Stanley	Hot_spring		O_M source	Central_App_Crys	N_Appalachian	NW_Arctic	NE_Arctic	Sonora
AZShelf0	1	0.4097	0.6712	0.8107	0.9083	0.6515	0.6625	0.1303	0.2323	0.1948	0.1819	0.2463	0.7696	0.733	0.8134	0.1844	0.4619	0.7458	0.7305	0.5881	0.7053	0.6582	0.5405	0.646	0.5127
BC05	0.4097	1	0.5071	0.3039	0.3792	0.2083	0.2371	0.1463	0.436	0.3652	0.3295	0.4061	0.3104	0.276	0.3542	0.2969	0.1654	0.303	0.2799	0.3599	0.2632	0.2591	0.3751	0.3882	0.5762
06GC149	0.6712	0.5071	1	0.5244	0.6078	0.396	0.4069	0.2034	0.3452	0.3278	0.3174	0.3897	0.5593	0.4482	0.5942	0.3033	0.4416	0.4966	0.5021	0.3852	0.445	0.4884	0.6057	0.6982	0.6478
Surprise_Cyn2	0.8107	0.3039	0.5244	1	0.8418	0.7485	0.8305	0.0805	0.137	0.1059	0.1108	0.1505	0.7614	0.8469	0.7812	0.1164	0.4183	0.784	0.7687	0.6614	0.8469	0.6575	0.4545	0.5322	0.378
SurpriseC_Cngl	0.9083	0.3792	0.6078	0.8418	1	0.6756	0.7031	0.1219	0.2094	0.1666	0.1536	0.2134	0.8005	0.796	0.8344	0.1646	0.4625	0.8013	0.781	0.606	0.7412	0.6878	0.5363	0.6414	0.4701
Princeton	0.6515	0.2083	0.396	0.7485	0.6756	1	0.7676	0.0304	0.0537	0.024	0.0312	0.0516	0.6325	0.7389	0.6631	0.0354	0.3574	0.7259	0.6604	0.6821	0.805	0.5306	0.3248	0.3935	0.2575
Bluestone	0.6625	0.2371	0.4069	0.8305	0.7031	0.7676	1	0.0339	0.0584	0.0322	0.0454	0.0582	0.6235	0.8004	0.6485	0.0472	0.3214	0.7232	0.6824	0.7029	0.8927	0.5545	0.2993	0.3866	0.2863
24PL09	0.1303	0.1463	0.2034	0.0805	0.1219	0.0304	0.0339	1	0.5441	0.5833	0.5468	0.5442	0.1506	0.0366	0.1337	0.6172	0.1999	0.0859	0.0621	0.0729	0.0491	0.1135	0.4193	0.2846	0.3464
10JM94	0.2323	0.436	0.3452	0.137	0.2094	0.0537	0.0584	0.5441	1	0.7703	0.6445	0.735	0.189	0.0629	0.1977	0.7189	0.1774	0.1414	0.0928	0.0912	0.0778	0.1598	0.4931	0.3394	0.4237
40JM94	0.1948	0.3652	0.3278	0.1059	0.1666	0.024	0.0322	0.5833	0.7703	1	0.7229	0.8001	0.1823	0.0292	0.179	0.7803	0.2083	0.1087	0.0582	0.0625	0.0454	0.1259	0.5131	0.3601	0.4071
05PL15	0.1819	0.3295	0.3174	0.1108	0.1536	0.0312	0.0454	0.5468	0.6445	0.7229	1	0.7587	0.194	0.0383	0.174	0.7566	0.2016	0.0983	0.0651	0.1213	0.0573	0.1467	0.5552	0.3605	0.4219
09LB04	0.2463	0.4061	0.3897	0.1505	0.2134	0.0516	0.0582	0.5442	0.735	0.8001	0.7587	1	0.2234	0.0635	0.2324	0.8001	0.1983	0.1281	0.0938	0.1306	0.0763	0.1653	0.5504	0.4249	0.4725
Hinton	0.7696	0.3104	0.5593	0.7614	0.8005	0.6325	0.6235	0.1506	0.189	0.1823	0.194	0.2234	1	0.7497	0.8708	0.1908	0.4267	0.7898	0.7427	0.5906	0.6602	0.6329	0.5685	0.6444	0.4637
Mauch_Chunk	0.733	0.276	0.4482	0.8469	0.796	0.7389	0.8004	0.0366	0.0629	0.0292	0.0383	0.0635	0.7497	1	0.7398	0.0573	0.4355	0.7784	0.8506	0.6421	0.8319	0.6307	0.4003	0.4819	0.2961
KY-21-SG	0.8134	0.3542	0.5942	0.7812	0.8344	0.6631	0.6485	0.1337	0.1977	0.179	0.174	0.2324	0.8708	0.7398	1	0.1819	0.4107	0.8253	0.7301	0.6375	0.6764	0.6325	0.5491	0.662	0.4869
Tonka	0.1844	0.2969	0.3033	0.1164	0.1646	0.0354	0.0472	0.6172	0.7189	0.7803	0.7566	0.8001	0.1908	0.0573	0.1819	1	0.2298	0.1075	0.0848	0.1224	0.0609	0.1467	0.5335	0.3691	0.3948
Stanley	0.4619	0.1654	0.4416	0.4183	0.4625	0.3574	0.3214	0.1999	0.1774	0.2083	0.2016	0.1983	0.4267	0.4355	0.4107	0.2298	1	0.4022	0.535	0.2523	0.3651	0.5097	0.4653	0.5515	0.2587
Hot_spring	0.7458	0.303	0.4966	0.784	0.8013	0.7259	0.7232	0.0859	0.1414	0.1087	0.0983	0.1281	0.7898	0.7784	0.8253	0.1075	0.4022	1	0.7567	0.701	0.7393	0.6411	0.4867	0.5542	0.3655
09-CM-699	0.7305	0.2799	0.5021	0.7687	0.781	0.6604	0.6824	0.0621	0.0928	0.0582	0.0651	0.0938	0.7427	0.8506	0.7301	0.0848	0.535	0.7567	1	0.5459	0.7216	0.6751	0.4581	0.562	0.3216
O_M source	0.5881	0.3599	0.3852	0.6614	0.606	0.6821	0.7029	0.0729	0.0912	0.0625	0.1213	0.1306	0.5906	0.6421	0.6375	0.1224	0.2523	0.701	0.5459	1	0.7149	0.4548	0.3048	0.3654	0.3703
Central_App_Crys	0.7053	0.2632	0.445	0.8469	0.7412	0.805	0.8927	0.0491	0.0778	0.0454	0.0573	0.0763	0.6602	0.8319	0.6764	0.0609	0.3651	0.7393	0.7216	0.7149	1	0.5755	0.3413	0.4275	0.3085
N_Appalachian	0.6582	0.2591	0.4884	0.6575	0.6878	0.5306	0.5545	0.1135	0.1598	0.1259	0.1467	0.1653	0.6329	0.6307	0.6325	0.1467	0.5097	0.6411	0.6751	0.4548	0.5755	1	0.4991	0.5727	0.3453
NW_Arctic	0.5405	0.3751	0.6057	0.4545	0.5363	0.3248	0.2993	0.4193	0.4931	0.5131	0.5552	0.5504	0.5685	0.4003	0.5491	0.5335	0.4653	0.4867	0.4581	0.3048	0.3413	0.4991	1	0.7424	0.5781
NE_Arctic	0.646	0.3882	0.6982	0.5322	0.6414	0.3935	0.3866	0.2846	0.3394	0.3601	0.3605	0.4249	0.6444	0.4819	0.662	0.3691	0.5515	0.5542	0.562	0.3654	0.4275	0.5727	0.7424	1	0.5539
Sonora	0.5127	0.5762	0.6478	0.378	0.4701	0.2575	0.2863	0.3464	0.4237	0.4071	0.4219	0.4725	0.4637	0.2961	0.4869	0.3948	0.2587	0.3655	0.3216	0.3703	0.3085	0.3453	0.5781	0.5539	1

## Sheet: 1-Morrowan-Atokan
pdp_x	AZShelf1	MS11	MS10	MS01	MSGE313	BC01	BC02	CC01	ML01	MP-DZ1	1QZ19	SY-D	Tumbling Run	Pottsville Fm	Pocohontas	Lee	Racoon	Montevallo	Sewanee	KY-18-CB	VA-1-GN	OH-4-SN	OH-1-SS	Watahomigi	Manakacha1	BCRA-01-10	MB1-3	MB2-4	MB2-2	MB2-3	MB2-5	MB2-1	MB1-2	MB1-1	16	23	29	38	48	49	50	46-1	46-2	IB_AD	IB_M1	IB_M2	FCB_AD	FCB_A2	FCB_A1
AZShelf1	1	0.3482	0.2495	0.3708	0.1917	0.4595	0.1927	0.1516	0.2244	0.1234	0.9289	0.9507	0.0482	0.1156	0.0763	0.239	0.1357	0.1446	0.1651	0.4697	0.1431	0.1861	0.0935	0.6787	0.8439	0.1728	0.2693	0.3261	0.2942	0.4317	0.3065	0.3184	0.2701	0.1992	0.3236	0.3992	0.2935	0.3396	0.4835	0.2117	0.3591	0.4414	0.261	0.2414	0.3983	0.0865	0.2835	0.3951	0.1959
MS11	0.3482	1	0.7441	0.5826	0.2518	0.2314	0.075	0.3242	0.3265	0.0945	0.2895	0.3439	0.0375	0.1806	0.2052	0.3596	0.2851	0.2839	0.1155	0.3295	0.3869	0.2367	0.0735	0.2719	0.3223	0.2909	0.2253	0.3865	0.3899	0.3991	0.2062	0.2584	0.3118	0.212	0.3351	0.2717	0.3007	0.2866	0.2966	0.1286	0.236	0.4062	0.2571	0.2632	0.2971	0.1051	0.4144	0.408	0.329
MS10	0.2495	0.7441	1	0.5711	0.3321	0.2244	0.1271	0.5687	0.1818	0.0761	0.2116	0.2633	0.0214	0.0985	0.2473	0.3028	0.2202	0.202	0.0462	0.2027	0.2873	0.1715	0.0529	0.1866	0.1894	0.1707	0.1686	0.2297	0.2142	0.2636	0.1277	0.2731	0.2669	0.1514	0.3136	0.1806	0.2486	0.1878	0.2498	0.0942	0.1602	0.2846	0.1276	0.2022	0.1819	0.0604	0.3066	0.298	0.1835
MS01	0.3708	0.5826	0.5711	1	0.7836	0.52	0.4572	0.5659	0.1442	0.0636	0.2521	0.3711	0.0102	0.0548	0.075	0.2486	0.1381	0.1147	0.0623	0.1956	0.154	0.1058	0.0519	0.4518	0.3627	0.1182	0.1516	0.1992	0.2028	0.2748	0.1372	0.1681	0.1937	0.1068	0.1971	0.1933	0.2545	0.1935	0.244	0.0756	0.1705	0.2498	0.1408	0.1481	0.2403	0.032	0.2282	0.2645	0.1456
MSGE313	0.1917	0.2518	0.3321	0.7836	1	0.3678	0.4852	0.5283	0.0337	0.019	0.1148	0.1908	0.0019	0.0067	0.0256	0.1192	0.0681	0.0271	0.0072	0.0498	0.0466	0.0263	0.0095	0.3072	0.1883	0.0217	0.0649	0.0624	0.0633	0.1121	0.0448	0.0806	0.0819	0.0282	0.0695	0.0788	0.1263	0.0708	0.1173	0.019	0.0657	0.0982	0.0451	0.0491	0.0952	0.0043	0.0661	0.0996	0.0446
BC01	0.4595	0.2314	0.2244	0.52	0.3678	1	0.7	0.3034	0.1056	0.069	0.3114	0.3957	0.0044	0.0366	0.0391	0.1754	0.1207	0.0832	0.0494	0.258	0.094	0.091	0.0447	0.622	0.5753	0.1026	0.2607	0.2002	0.1961	0.2509	0.1934	0.1667	0.1538	0.096	0.2115	0.2004	0.1808	0.1883	0.2344	0.1123	0.2121	0.1998	0.1599	0.0967	0.2113	0.0313	0.1467	0.2521	0.1263
BC02	0.1927	0.075	0.1271	0.4572	0.4852	0.7	1	0.3627	0.0003837	0.00027141	0.1092	0.1671	0.00065121	0.0027	0.0011	0.0336	0.006	3.1308e-05	0.0013	0.0162	0.00058724	0.00011518	3.3129e-05	0.366	0.2388	3.6828e-05	0.0288	0.0089	0.0047	0.0156	0.0071	0.0093	0.0015	0.0011	0.0111	0.0199	0.0167	0.0151	0.0424	0.00089125	0.0148	0.0068	0.0061	2.0806e-05	0.0241	0.0014	0.0038	0.0273	7.99e-05
CC01	0.1516	0.3242	0.5687	0.5659	0.5283	0.3034	0.3627	1	0.0189	0.0043	0.1296	0.1563	0.0046	0.0045	0.0076	0.0657	0.0037	0.0021	0.0015	0.0147	0.0104	0.0011	0.00048085	0.1561	0.0867	0.00028668	0.0182	0.0075	0.0088	0.0425	0.0091	0.0266	0.0268	0.00012174	0.0714	0.0081	0.0453	0.014	0.026	0.0155	0.0224	0.0328	0.008	0.0018	0.0146	0.00061018	0.0443	0.0428	0.0017
ML01	0.2244	0.3265	0.1818	0.1442	0.0337	0.1056	0.0003837	0.0189	1	0.4768	0.1944	0.193	0.1	0.4505	0.2568	0.3044	0.2584	0.5875	0.4756	0.6856	0.6692	0.7	0.387	0.1486	0.2899	0.7349	0.5008	0.6939	0.5941	0.5197	0.5348	0.5384	0.5387	0.5389	0.6483	0.6708	0.5577	0.6347	0.3719	0.4773	0.684	0.7183	0.7802	0.5891	0.5995	0.3402	0.798	0.7413	0.6992
MP-DZ1	0.1234	0.0945	0.0761	0.0636	0.019	0.069	0.00027141	0.0043	0.4768	1	0.0788	0.111	0.1103	0.4982	0.4066	0.1971	0.2009	0.289	0.479	0.4386	0.4332	0.6919	0.5314	0.164	0.1617	0.5912	0.2903	0.3973	0.3559	0.2804	0.508	0.4978	0.3699	0.4757	0.5379	0.5341	0.6065	0.5527	0.2395	0.5591	0.5298	0.4874	0.5377	0.5174	0.4436	0.3582	0.5391	0.5514	0.4276
1QZ19	0.9289	0.2895	0.2116	0.2521	0.1148	0.3114	0.1092	0.1296	0.1944	0.0788	1	0.8443	0.0757	0.0777	0.0389	0.1828	0.0838	0.1022	0.1099	0.3662	0.0891	0.1285	0.0555	0.4821	0.688	0.1127	0.1785	0.2247	0.2082	0.3381	0.1953	0.2327	0.2053	0.1386	0.2504	0.3005	0.2224	0.2523	0.3975	0.1602	0.2992	0.3691	0.1937	0.1891	0.2948	0.0756	0.2289	0.3004	0.1288
SY-D	0.9507	0.3439	0.2633	0.3711	0.1908	0.3957	0.1671	0.1563	0.193	0.111	0.8443	1	0.033	0.098	0.0941	0.2051	0.1271	0.1267	0.1358	0.438	0.1425	0.161	0.0984	0.5856	0.7495	0.1567	0.2368	0.3127	0.2585	0.4175	0.2972	0.3306	0.2492	0.1718	0.3013	0.3811	0.2749	0.2974	0.4743	0.1958	0.3068	0.4139	0.2256	0.2209	0.3677	0.0611	0.2633	0.3744	0.1621
Tumbling Run	0.0482	0.0375	0.0214	0.0102	0.0019	0.0044	0.00065121	0.0046	0.1	0.1103	0.0757	0.033	1	0.2338	0.0282	0.0091	0.0627	0.0147	0.0912	0.0722	0.059	0.1593	0.0723	0.0409	0.0074	0.148	0.0196	0.0415	0.0239	0.037	0.0127	0.065	0.0304	0.0538	0.0737	0.0618	0.0808	0.0939	0.0675	0.0484	0.0412	0.0654	0.0203	0.1284	0.1967	0.2399	0.259	0.1598	0.0423
Pottsville Fm	0.1156	0.1806	0.0985	0.0548	0.0067	0.0366	0.0027	0.0045	0.4505	0.4982	0.0777	0.098	0.2338	1	0.3322	0.2039	0.4395	0.3325	0.4664	0.4554	0.5026	0.7112	0.3358	0.1638	0.1452	0.6681	0.2879	0.4694	0.4127	0.3465	0.3398	0.4043	0.3094	0.413	0.3762	0.458	0.3725	0.4838	0.3213	0.2536	0.3099	0.4289	0.3703	0.5664	0.4964	0.4334	0.5999	0.513	0.4626
Pocohontas	0.0763	0.2052	0.2473	0.075	0.0256	0.0391	0.0011	0.0076	0.2568	0.4066	0.0389	0.0941	0.0282	0.3322	1	0.1542	0.3523	0.3362	0.1984	0.3158	0.606	0.4656	0.2921	0.0629	0.1099	0.356	0.359	0.4248	0.3598	0.275	0.3406	0.5959	0.4727	0.5105	0.4224	0.384	0.4835	0.3418	0.3195	0.3249	0.3283	0.4406	0.3075	0.4309	0.2516	0.1666	0.3744	0.4506	0.3706
Lee	0.239	0.3596	0.3028	0.2486	0.1192	0.1754	0.0336	0.0657	0.3044	0.1971	0.1828	0.2051	0.0091	0.2039	0.1542	1	0.2238	0.3588	0.1658	0.358	0.2946	0.2948	0.0805	0.215	0.3296	0.3616	0.2788	0.3655	0.446	0.3034	0.2948	0.2954	0.3062	0.2924	0.4014	0.4245	0.3681	0.4724	0.3732	0.2288	0.3774	0.4314	0.3853	0.3105	0.3645	0.1496	0.3094	0.3727	0.4709
Racoon	0.1357	0.2851	0.2202	0.1381	0.0681	0.1207	0.006	0.0037	0.2584	0.2009	0.0838	0.1271	0.0627	0.4395	0.3523	0.2238	1	0.2677	0.2193	0.3749	0.5302	0.4533	0.2054	0.1798	0.1753	0.4352	0.381	0.4725	0.4562	0.4615	0.2741	0.418	0.4766	0.366	0.2575	0.3296	0.2751	0.2608	0.3858	0.1158	0.2128	0.394	0.1997	0.487	0.299	0.1784	0.3916	0.4033	0.3799
Montevallo	0.1446	0.2839	0.202	0.1147	0.0271	0.0832	3.1308e-05	0.0021	0.5875	0.289	0.1022	0.1267	0.0147	0.3325	0.3362	0.3588	0.2677	1	0.2882	0.5415	0.6246	0.5337	0.2085	0.1037	0.2574	0.5941	0.5301	0.6247	0.5984	0.3897	0.508	0.5195	0.5274	0.5868	0.511	0.5462	0.443	0.5265	0.3933	0.28	0.5128	0.5555	0.6344	0.5354	0.4404	0.2566	0.5164	0.5634	0.6395
Sewanee	0.1651	0.1155	0.0462	0.0623	0.0072	0.0494	0.0013	0.0015	0.4756	0.479	0.1099	0.1358	0.0912	0.4664	0.1984	0.1658	0.2193	0.2882	1	0.4628	0.342	0.6336	0.415	0.2402	0.2195	0.5321	0.3056	0.4067	0.3729	0.3724	0.42	0.2982	0.3483	0.4378	0.3534	0.4605	0.3393	0.4477	0.2419	0.3277	0.3974	0.4364	0.3898	0.4858	0.5257	0.2762	0.533	0.4669	0.4365
KY-18-CB	0.4697	0.3295	0.2027	0.1956	0.0498	0.258	0.0162	0.0147	0.6856	0.4386	0.3662	0.438	0.0722	0.4554	0.3158	0.358	0.3749	0.5415	0.4628	1	0.608	0.671	0.3748	0.3932	0.5515	0.6736	0.673	0.8054	0.6806	0.7095	0.678	0.6783	0.6152	0.612	0.6535	0.7545	0.5534	0.6681	0.5962	0.4426	0.6471	0.7551	0.667	0.6293	0.7128	0.3304	0.6974	0.7384	0.7051
VA-1-GN	0.1431	0.3869	0.2873	0.154	0.0466	0.094	0.00058724	0.0104	0.6692	0.4332	0.0891	0.1425	0.059	0.5026	0.606	0.2946	0.5302	0.6246	0.342	0.608	1	0.7166	0.3414	0.123	0.2242	0.6841	0.663	0.7791	0.6869	0.5471	0.5435	0.7425	0.7345	0.6816	0.6584	0.6153	0.6106	0.5304	0.4886	0.3841	0.5269	0.7022	0.6157	0.7068	0.4924	0.313	0.6975	0.7342	0.6887
OH-4-SN	0.1861	0.2367	0.1715	0.1058	0.0263	0.091	0.00011518	0.0011	0.7	0.6919	0.1285	0.161	0.1593	0.7112	0.4656	0.2948	0.4533	0.5337	0.6336	0.671	0.7166	1	0.5379	0.2273	0.2437	0.8512	0.5342	0.6788	0.6085	0.5441	0.5602	0.6487	0.608	0.685	0.6185	0.6748	0.5977	0.6332	0.424	0.4491	0.5713	0.6854	0.6073	0.7863	0.6426	0.4981	0.8265	0.7473	0.6545
OH-1-SS	0.0935	0.0735	0.0529	0.0519	0.0095	0.0447	3.3129e-05	0.00048085	0.387	0.5314	0.0555	0.0984	0.0723	0.3358	0.2921	0.0805	0.2054	0.2085	0.415	0.3748	0.3414	0.5379	1	0.1262	0.0977	0.4019	0.2376	0.2842	0.2224	0.1972	0.3205	0.2951	0.293	0.2895	0.3114	0.4287	0.3549	0.2945	0.1897	0.3732	0.309	0.3657	0.3311	0.4093	0.3216	0.1964	0.4874	0.3769	0.2349
Watahomigi	0.6787	0.2719	0.1866	0.4518	0.3072	0.622	0.366	0.1561	0.1486	0.164	0.4821	0.5856	0.0409	0.1638	0.0629	0.215	0.1798	0.1037	0.2402	0.3932	0.123	0.2273	0.1262	1	0.7019	0.1962	0.2915	0.2958	0.2745	0.3539	0.3064	0.2355	0.2363	0.1978	0.2482	0.3131	0.2432	0.3072	0.3224	0.1718	0.2502	0.2994	0.202	0.2013	0.4294	0.1214	0.2455	0.343	0.1959
Manakacha1	0.8439	0.3223	0.1894	0.3627	0.1883	0.5753	0.2388	0.0867	0.2899	0.1617	0.688	0.7495	0.0074	0.1452	0.1099	0.3296	0.1753	0.2574	0.2195	0.5515	0.2242	0.2437	0.0977	0.7019	1	0.2447	0.4079	0.4407	0.4404	0.4695	0.4378	0.3707	0.3317	0.3044	0.4132	0.5052	0.3665	0.4756	0.5278	0.277	0.4963	0.507	0.4171	0.2928	0.4367	0.0875	0.3012	0.461	0.3542
BCRA-01-10	0.1728	0.2909	0.1707	0.1182	0.0217	0.1026	3.6828e-05	0.00028668	0.7349	0.5912	0.1127	0.1567	0.148	0.6681	0.356	0.3616	0.4352	0.5941	0.5321	0.6736	0.6841	0.8512	0.4019	0.1962	0.2447	1	0.508	0.7329	0.6334	0.5344	0.5484	0.5607	0.5439	0.6235	0.6188	0.6519	0.557	0.6777	0.44	0.4174	0.5657	0.6329	0.6682	0.7086	0.6821	0.456	0.796	0.7234	0.7256
MB1-3	0.2693	0.2253	0.1686	0.1516	0.0649	0.2607	0.0288	0.0182	0.5008	0.2903	0.1785	0.2368	0.0196	0.2879	0.359	0.2788	0.381	0.5301	0.3056	0.673	0.663	0.5342	0.2376	0.2915	0.4079	0.508	1	0.7272	0.6512	0.5859	0.5887	0.5815	0.7205	0.6362	0.5331	0.5465	0.4388	0.4594	0.5029	0.2782	0.4984	0.5699	0.5349	0.5387	0.51	0.2227	0.4881	0.5858	0.6233
MB2-4	0.3261	0.3865	0.2297	0.1992	0.0624	0.2002	0.0089	0.0075	0.6939	0.3973	0.2247	0.3127	0.0415	0.4694	0.4248	0.3655	0.4725	0.6247	0.4067	0.8054	0.7791	0.6788	0.2842	0.2958	0.4407	0.7329	0.7272	1	0.7951	0.6873	0.6937	0.7064	0.7445	0.7362	0.6255	0.7063	0.5463	0.647	0.5609	0.3846	0.6085	0.7352	0.7238	0.6478	0.661	0.3606	0.6629	0.7421	0.7958
MB2-2	0.2942	0.3899	0.2142	0.2028	0.0633	0.1961	0.0047	0.0088	0.5941	0.3559	0.2082	0.2585	0.0239	0.4127	0.3598	0.446	0.4562	0.5984	0.3729	0.6806	0.6869	0.6085	0.2224	0.2745	0.4404	0.6334	0.6512	0.7951	1	0.6693	0.6454	0.5778	0.7131	0.7005	0.5516	0.6224	0.5203	0.6178	0.4917	0.3091	0.5994	0.7095	0.6371	0.6437	0.5896	0.3022	0.5691	0.6589	0.788
MB2-3	0.4317	0.3991	0.2636	0.2748	0.1121	0.2509	0.0156	0.0425	0.5197	0.2804	0.3381	0.4175	0.037	0.3465	0.275	0.3034	0.4615	0.3897	0.3724	0.7095	0.5471	0.5441	0.1972	0.3539	0.4695	0.5344	0.5859	0.6873	0.6693	1	0.5677	0.5677	0.6814	0.5492	0.5324	0.5654	0.4726	0.4755	0.5185	0.2702	0.5243	0.6829	0.4685	0.5719	0.6113	0.1979	0.5372	0.6023	0.5998
MB2-5	0.3065	0.2062	0.1277	0.1372	0.0448	0.1934	0.0071	0.0091	0.5348	0.508	0.1953	0.2972	0.0127	0.3398	0.3406	0.2948	0.2741	0.508	0.42	0.678	0.5435	0.5602	0.3205	0.3064	0.4378	0.5484	0.5887	0.6937	0.6454	0.5677	1	0.6319	0.5872	0.6519	0.6455	0.6324	0.526	0.5946	0.4293	0.4468	0.6484	0.6262	0.6932	0.5129	0.5439	0.2373	0.4616	0.6076	0.6301
MB2-1	0.3184	0.2584	0.2731	0.1681	0.0806	0.1667	0.0093	0.0266	0.5384	0.4978	0.2327	0.3306	0.065	0.4043	0.5959	0.2954	0.418	0.5195	0.2982	0.6783	0.7425	0.6487	0.2951	0.2355	0.3707	0.5607	0.5815	0.7064	0.5778	0.5677	0.6319	1	0.6537	0.6297	0.7234	0.7172	0.6872	0.593	0.6014	0.5077	0.6008	0.7347	0.5896	0.6339	0.5138	0.2689	0.5933	0.7345	0.5855
MB1-2	0.2701	0.3118	0.2669	0.1937	0.0819	0.1538	0.0015	0.0268	0.5387	0.3699	0.2053	0.2492	0.0304	0.3094	0.4727	0.3062	0.4766	0.5274	0.3483	0.6152	0.7345	0.608	0.293	0.2363	0.3317	0.5439	0.7205	0.7445	0.7131	0.6814	0.5872	0.6537	1	0.7373	0.5955	0.5506	0.5607	0.4857	0.4933	0.3393	0.5602	0.6831	0.5293	0.6547	0.5135	0.2307	0.5539	0.6296	0.6106
MB1-1	0.1992	0.212	0.1514	0.1068	0.0282	0.096	0.0011	0.00012174	0.5389	0.4757	0.1386	0.1718	0.0538	0.413	0.5105	0.2924	0.366	0.5868	0.4378	0.612	0.6816	0.685	0.2895	0.1978	0.3044	0.6235	0.6362	0.7362	0.7005	0.5492	0.6519	0.6297	0.7373	1	0.5797	0.5847	0.5592	0.5955	0.4517	0.3526	0.6001	0.6554	0.5933	0.6774	0.5884	0.3536	0.5607	0.623	0.7117
16	0.3236	0.3351	0.3136	0.1971	0.0695	0.2115	0.0111	0.0714	0.6483	0.5379	0.2504	0.3013	0.0737	0.3762	0.4224	0.4014	0.2575	0.511	0.3534	0.6535	0.6584	0.6185	0.3114	0.2482	0.4132	0.6188	0.5331	0.6255	0.5516	0.5324	0.6455	0.7234	0.5955	0.5797	1	0.7114	0.7892	0.7589	0.5858	0.6974	0.7332	0.7602	0.7105	0.609	0.5674	0.2939	0.6491	0.7498	0.6249
23	0.3992	0.2717	0.1806	0.1933	0.0788	0.2004	0.0199	0.0081	0.6708	0.5341	0.3005	0.3811	0.0618	0.458	0.384	0.4245	0.3296	0.5462	0.4605	0.7545	0.6153	0.6748	0.4287	0.3131	0.5052	0.6519	0.5465	0.7063	0.6224	0.5654	0.6324	0.7172	0.5506	0.5847	0.7114	1	0.7336	0.8235	0.6106	0.5911	0.777	0.8358	0.7773	0.6403	0.7269	0.3075	0.68	0.7429	0.7194
29	0.2935	0.3007	0.2486	0.2545	0.1263	0.1808	0.0167	0.0453	0.5577	0.6065	0.2224	0.2749	0.0808	0.3725	0.4835	0.3681	0.2751	0.443	0.3393	0.5534	0.6106	0.5977	0.3549	0.2432	0.3665	0.557	0.4388	0.5463	0.5203	0.4726	0.526	0.6872	0.5607	0.5592	0.7892	0.7336	1	0.7665	0.6025	0.6782	0.7525	0.7797	0.6499	0.6246	0.5581	0.2918	0.622	0.7192	0.5883
38	0.3396	0.2866	0.1878	0.1935	0.0708	0.1883	0.0151	0.014	0.6347	0.5527	0.2523	0.2974	0.0939	0.4838	0.3418	0.4724	0.2608	0.5265	0.4477	0.6681	0.5304	0.6332	0.2945	0.3072	0.4756	0.6777	0.4594	0.647	0.6178	0.4755	0.5946	0.593	0.4857	0.5955	0.7589	0.8235	0.7665	1	0.5824	0.6288	0.7931	0.7529	0.7588	0.5944	0.7373	0.3765	0.6506	0.7395	0.767
48	0.4835	0.2966	0.2498	0.244	0.1173	0.2344	0.0424	0.026	0.3719	0.2395	0.3975	0.4743	0.0675	0.3213	0.3195	0.3732	0.3858	0.3933	0.2419	0.5962	0.4886	0.424	0.1897	0.3224	0.5278	0.44	0.5029	0.5609	0.4917	0.5185	0.4293	0.6014	0.4933	0.4517	0.5858	0.6106	0.6025	0.5824	1	0.3837	0.5205	0.6286	0.4284	0.5957	0.5149	0.1962	0.4751	0.6111	0.4808
49	0.2117	0.1286	0.0942	0.0756	0.019	0.1123	0.00089125	0.0155	0.4773	0.5591	0.1602	0.1958	0.0484	0.2536	0.3249	0.2288	0.1158	0.28	0.3277	0.4426	0.3841	0.4491	0.3732	0.1718	0.277	0.4174	0.2782	0.3846	0.3091	0.2702	0.4468	0.5077	0.3393	0.3526	0.6974	0.5911	0.6782	0.6288	0.3837	1	0.6326	0.5436	0.6376	0.3694	0.3903	0.2216	0.4327	0.5475	0.44
50	0.3591	0.236	0.1602	0.1705	0.0657	0.2121	0.0148	0.0224	0.684	0.5298	0.2992	0.3068	0.0412	0.3099	0.3283	0.3774	0.2128	0.5128	0.3974	0.6471	0.5269	0.5713	0.309	0.2502	0.4963	0.5657	0.4984	0.6085	0.5994	0.5243	0.6484	0.6008	0.5602	0.6001	0.7332	0.777	0.7525	0.7931	0.5205	0.6326	1	0.7813	0.8209	0.5406	0.5877	0.2307	0.56	0.7086	0.7154
46-1	0.4414	0.4062	0.2846	0.2498	0.0982	0.1998	0.0068	0.0328	0.7183	0.4874	0.3691	0.4139	0.0654	0.4289	0.4406	0.4314	0.394	0.5555	0.4364	0.7551	0.7022	0.6854	0.3657	0.2994	0.507	0.6329	0.5699	0.7352	0.7095	0.6829	0.6262	0.7347	0.6831	0.6554	0.7602	0.8358	0.7797	0.7529	0.6286	0.5436	0.7813	1	0.7033	0.6918	0.6709	0.2891	0.7139	0.7858	0.7125
46-2	0.261	0.2571	0.1276	0.1408	0.0451	0.1599	0.0061	0.008	0.7802	0.5377	0.1937	0.2256	0.0203	0.3703	0.3075	0.3853	0.1997	0.6344	0.3898	0.667	0.6157	0.6073	0.3311	0.202	0.4171	0.6682	0.5349	0.7238	0.6371	0.4685	0.6932	0.5896	0.5293	0.5933	0.7105	0.7773	0.6499	0.7588	0.4284	0.6376	0.8209	0.7033	1	0.5128	0.5651	0.2896	0.5828	0.6748	0.767
IB_AD	0.2414	0.2632	0.2022	0.1481	0.0491	0.0967	2.0806e-05	0.0018	0.5891	0.5174	0.1891	0.2209	0.1284	0.5664	0.4309	0.3105	0.487	0.5354	0.4858	0.6293	0.7068	0.7863	0.4093	0.2013	0.2928	0.7086	0.5387	0.6478	0.6437	0.5719	0.5129	0.6339	0.6547	0.6774	0.609	0.6403	0.6246	0.5944	0.5957	0.3694	0.5406	0.6918	0.5128	1	0.6061	0.4066	0.7278	0.7263	0.6308
IB_M1	0.3983	0.2971	0.1819	0.2403	0.0952	0.2113	0.0241	0.0146	0.5995	0.4436	0.2948	0.3677	0.1967	0.4964	0.2516	0.3645	0.299	0.4404	0.5257	0.7128	0.4924	0.6426	0.3216	0.4294	0.4367	0.6821	0.51	0.661	0.5896	0.6113	0.5439	0.5138	0.5135	0.5884	0.5674	0.7269	0.5581	0.7373	0.5149	0.3903	0.5877	0.6709	0.5651	0.6061	1	0.4505	0.717	0.753	0.6902
IB_M2	0.0865	0.1051	0.0604	0.032	0.0043	0.0313	0.0014	0.00061018	0.3402	0.3582	0.0756	0.0611	0.2399	0.4334	0.1666	0.1496	0.1784	0.2566	0.2762	0.3304	0.313	0.4981	0.1964	0.1214	0.0875	0.456	0.2227	0.3606	0.3022	0.1979	0.2373	0.2689	0.2307	0.3536	0.2939	0.3075	0.2918	0.3765	0.1962	0.2216	0.2307	0.2891	0.2896	0.4066	0.4505	1	0.4767	0.3945	0.367
FCB_AD	0.2835	0.4144	0.3066	0.2282	0.0661	0.1467	0.0038	0.0443	0.798	0.5391	0.2289	0.2633	0.259	0.5999	0.3744	0.3094	0.3916	0.5164	0.533	0.6974	0.6975	0.8265	0.4874	0.2455	0.3012	0.796	0.4881	0.6629	0.5691	0.5372	0.4616	0.5933	0.5539	0.5607	0.6491	0.68	0.622	0.6506	0.4751	0.4327	0.56	0.7139	0.5828	0.7278	0.717	0.4767	1	0.8297	0.6062
FCB_A2	0.3951	0.408	0.298	0.2645	0.0996	0.2521	0.0273	0.0428	0.7413	0.5514	0.3004	0.3744	0.1598	0.513	0.4506	0.3727	0.4033	0.5634	0.4669	0.7384	0.7342	0.7473	0.3769	0.343	0.461	0.7234	0.5858	0.7421	0.6589	0.6023	0.6076	0.7345	0.6296	0.623	0.7498	0.7429	0.7192	0.7395	0.6111	0.5475	0.7086	0.7858	0.6748	0.7263	0.753	0.3945	0.8297	1	0.689
FCB_A1	0.1959	0.329	0.1835	0.1456	0.0446	0.1263	7.99e-05	0.0017	0.6992	0.4276	0.1288	0.1621	0.0423	0.4626	0.3706	0.4709	0.3799	0.6395	0.4365	0.7051	0.6887	0.6545	0.2349	0.1959	0.3542	0.7256	0.6233	0.7958	0.788	0.5998	0.6301	0.5855	0.6106	0.7117	0.6249	0.7194	0.5883	0.767	0.4808	0.44	0.7154	0.7125	0.767	0.6308	0.6902	0.367	0.6062	0.689	1
S3	0.2624	0.2823	0.1661	0.1886	0.0648	0.2058	0.0163	0.0164	0.6957	0.6727	0.1872	0.2156	0.0835	0.5029	0.3505	0.4065	0.2991	0.5894	0.466	0.6958	0.6234	0.7335	0.4023	0.2889	0.3878	0.7496	0.5498	0.7136	0.6728	0.5017	0.6743	0.5996	0.5552	0.673	0.7004	0.7454	0.7496	0.8113	0.4977	0.5409	0.7417	0.7171	0.7844	0.6695	0.6845	0.4847	0.7002	0.7529	0.7698
O_M source	0.1435	0.4485	0.2794	0.1836	0.0441	0.0955	0.00022495	0.0168	0.7025	0.3156	0.0986	0.1407	0.0278	0.3559	0.3985	0.3157	0.3099	0.6437	0.2762	0.5934	0.7538	0.56	0.2127	0.0969	0.2266	0.5895	0.5329	0.6914	0.6215	0.5492	0.4927	0.5579	0.5534	0.5782	0.5307	0.5837	0.492	0.5028	0.3462	0.2814	0.5508	0.6551	0.625	0.5308	0.5075	0.2438	0.6185	0.6405	0.7248
Central_App_Crys	0.1556	0.3353	0.2748	0.1531	0.0443	0.091	0.00055879	0.0092	0.6922	0.5885	0.1	0.1543	0.054	0.5192	0.6835	0.344	0.4455	0.6602	0.3847	0.6243	0.9075	0.7678	0.4373	0.1226	0.2468	0.7133	0.6139	0.74	0.6732	0.503	0.6068	0.7757	0.7242	0.7413	0.7401	0.7016	0.743	0.6604	0.523	0.5232	0.6581	0.744	0.7051	0.7428	0.5116	0.316	0.7159	0.7599	0.7219
N_Appalachian	0.116	0.0452	0.0313	0.0262	0.0048	0.0274	6.7622e-05	0.0006364	0.2817	0.4816	0.1141	0.0875	0.4168	0.4408	0.1174	0.0845	0.0945	0.1306	0.3366	0.2762	0.1827	0.5317	0.2431	0.1487	0.0793	0.4418	0.1272	0.2081	0.1595	0.1652	0.1689	0.2373	0.1657	0.3009	0.2737	0.3004	0.2896	0.3547	0.1341	0.2495	0.222	0.2468	0.2338	0.3618	0.4099	0.5344	0.4709	0.3097	0.2197
NW_Arctic	0.2126	0.0825	0.0515	0.063	0.023	0.0703	0.0105	0.0099	0.0621	0.0552	0.1923	0.2037	0.0829	0.0817	0.0154	0.0425	0.0618	0.0151	0.1268	0.085	0.0297	0.0952	0.0467	0.2209	0.1258	0.1515	0.0549	0.071	0.0562	0.1916	0.0575	0.042	0.0955	0.0684	0.0892	0.0692	0.0649	0.079	0.0836	0.0512	0.0536	0.0825	0.0316	0.083	0.2149	0.0521	0.1171	0.1211	0.0468
NE_Arctic	0.4465	0.186	0.1321	0.177	0.0771	0.2321	0.0682	0.0661	0.2258	0.2006	0.3941	0.418	0.1498	0.2074	0.0812	0.1369	0.1188	0.1136	0.1891	0.3072	0.1549	0.2422	0.1338	0.4247	0.3365	0.2872	0.1983	0.2548	0.1923	0.3057	0.2185	0.2271	0.1995	0.1987	0.2773	0.267	0.273	0.2942	0.3096	0.2109	0.236	0.2795	0.1918	0.2259	0.4457	0.2167	0.3274	0.3772	0.1821
Sonora	0.4225	0.3041	0.2951	0.3921	0.259	0.3991	0.2269	0.2409	0.0366	0.0049	0.321	0.393	6.9512e-05	0.0043	0.0278	0.1906	0.072	0.0326	0.0382	0.177	0.0414	0.0267	0.0038	0.4716	0.4142	0.0467	0.1598	0.126	0.1305	0.2829	0.1059	0.0848	0.1473	0.0772	0.1289	0.1143	0.093	0.1143	0.1722	0.0773	0.1181	0.1439	0.0649	0.0507	0.2246	0.0025	0.065	0.1245	0.1434
KS	AZShelf1	MS11	MS10	MS01	MSGE313	BC01	BC02	CC01	ML01	MP-DZ1	1QZ19	SY-D	Tumbling Run	Pottsville Fm	Pocohontas	Lee	Racoon	Montevallo	Sewanee	KY-18-CB	VA-1-GN	OH-4-SN	OH-1-SS	Watahomigi	Manakacha1	BCRA-01-10	MB1-3	MB2-4	MB2-2	MB2-3	MB2-5	MB2-1	MB1-2	MB1-1	16	23	29	38	48	49	50	46-1	46-2	IB_AD	IB_M1	IB_M2	FCB_AD	FCB_A2	FCB_A1
AZShelf1	0	0.2813	0.36	0.1722	0.207	0.144	0.4396	0.2452	0.3924	0.5404	0.0452	0.0485	0.5525	0.5657	0.6126	0.2424	0.447	0.4907	0.4395	0.3182	0.5708	0.5305	0.5142	0.1672	0.069	0.476	0.301	0.3427	0.3195	0.211	0.3317	0.4251	0.3221	0.3891	0.3634	0.3278	0.3562	0.3332	0.2533	0.3357	0.2784	0.3098	0.3603	0.4353	0.2871	0.619	0.4556	0.3448	0.355
MS11	0.2813	0	0.1054	0.149	0.315	0.2924	0.5729	0.3852	0.3377	0.5659	0.3134	0.2549	0.5385	0.4797	0.4948	0.2351	0.3908	0.419	0.3902	0.2729	0.4459	0.4828	0.5041	0.3152	0.2976	0.4512	0.2524	0.2713	0.2877	0.1777	0.3032	0.3159	0.2808	0.3399	0.2935	0.2863	0.3333	0.3191	0.2005	0.3976	0.2823	0.2619	0.3597	0.4039	0.2798	0.588	0.3573	0.3088	0.3272
MS10	0.36	0.1054	0	0.2279	0.3692	0.3578	0.6199	0.3739	0.4191	0.5707	0.3889	0.3321	0.5633	0.4855	0.4954	0.2511	0.3744	0.4062	0.4393	0.3021	0.4514	0.4784	0.4939	0.3622	0.3792	0.4846	0.2396	0.2781	0.285	0.2059	0.3332	0.321	0.2679	0.3267	0.3295	0.3034	0.3405	0.3368	0.2023	0.392	0.3269	0.2866	0.4095	0.3924	0.3265	0.687	0.4112	0.3299	0.3527
MS01	0.1722	0.149	0.2279	0	0.1781	0.188	0.4485	0.2715	0.355	0.5517	0.1954	0.1554	0.5092	0.5742	0.5516	0.2528	0.4506	0.4367	0.4617	0.3068	0.5183	0.5419	0.506	0.2418	0.19	0.4829	0.3104	0.3326	0.326	0.2056	0.3355	0.4089	0.3243	0.3747	0.3361	0.3286	0.3596	0.3524	0.2563	0.3495	0.2861	0.2865	0.3685	0.4337	0.2764	0.6141	0.4057	0.3293	0.3627
MSGE313	0.207	0.315	0.3692	0.1781	0	0.1886	0.3384	0.2404	0.4552	0.6089	0.2033	0.2018	0.5802	0.6361	0.6693	0.3019	0.5078	0.5674	0.5083	0.3892	0.6392	0.6055	0.5865	0.2806	0.2055	0.5314	0.3731	0.4087	0.3922	0.2786	0.4004	0.4907	0.3886	0.4632	0.4083	0.3927	0.4303	0.399	0.3274	0.4049	0.3353	0.3631	0.434	0.5067	0.3517	0.6839	0.5217	0.4157	0.4127
BC01	0.144	0.2924	0.3578	0.188	0.1886	0	0.3102	0.2245	0.4436	0.5276	0.1734	0.185	0.5694	0.5662	0.5947	0.241	0.4314	0.5033	0.4376	0.3421	0.5604	0.5283	0.5158	0.1214	0.14	0.4551	0.2952	0.3376	0.3223	0.2322	0.3297	0.4573	0.3437	0.3933	0.377	0.3546	0.3908	0.349	0.3003	0.3366	0.325	0.3733	0.4204	0.4401	0.2746	0.5959	0.4763	0.3644	0.3419
BC02	0.4396	0.5729	0.6199	0.4485	0.3384	0.3102	0	0.4332	0.7339	0.7789	0.4671	0.4788	0.82	0.8171	0.8634	0.5387	0.684	0.7935	0.6657	0.6421	0.8272	0.8023	0.781	0.3103	0.4113	0.7291	0.5628	0.6226	0.5864	0.5322	0.6014	0.7481	0.6226	0.6404	0.6748	0.6448	0.6713	0.6393	0.5927	0.6367	0.6152	0.6636	0.7106	0.7103	0.5526	0.818	0.7547	0.6543	0.6006
CC01	0.2452	0.3852	0.3739	0.2715	0.2404	0.2245	0.4332	0	0.5639	0.7227	0.2515	0.2392	0.7075	0.7742	0.7927	0.401	0.6363	0.6768	0.6327	0.5202	0.7581	0.738	0.7207	0.3152	0.251	0.66	0.5081	0.5425	0.5273	0.4158	0.5333	0.6258	0.5236	0.5982	0.5374	0.5291	0.5479	0.5304	0.4624	0.5382	0.4574	0.5022	0.5658	0.6417	0.4883	0.785	0.6264	0.5454	0.5472
ML01	0.3924	0.3377	0.4191	0.355	0.4552	0.4436	0.7339	0.5639	0	0.287	0.422	0.3671	0.4038	0.2542	0.2574	0.2298	0.2376	0.1368	0.1337	0.1477	0.2075	0.2193	0.2639	0.476	0.4181	0.158	0.2129	0.1506	0.1989	0.2413	0.1961	0.1505	0.2353	0.1321	0.0944	0.1323	0.0922	0.1442	0.2343	0.1486	0.1644	0.1616	0.0942	0.1061	0.2	0.3308	0.1086	0.1004	0.1493
MP-DZ1	0.5404	0.5659	0.5707	0.5517	0.6089	0.5276	0.7789	0.7227	0.287	0	0.5717	0.5382	0.26	0.192	0.3617	0.4125	0.4482	0.4096	0.1868	0.3295	0.3611	0.1767	0.123	0.4984	0.524	0.2311	0.4087	0.4028	0.4214	0.4548	0.3183	0.3274	0.4261	0.3424	0.2933	0.306	0.2403	0.2777	0.4157	0.2487	0.2975	0.3407	0.2882	0.2664	0.3094	0.1712	0.2377	0.288	0.3803
1QZ19	0.0452	0.3134	0.3889	0.1954	0.2033	0.1734	0.4671	0.2515	0.422	0.5717	0	0.069	0.5692	0.6088	0.6374	0.2605	0.4741	0.5243	0.4713	0.3589	0.6015	0.5714	0.5558	0.1952	0.0958	0.4966	0.3403	0.3811	0.3589	0.2499	0.3679	0.4596	0.3518	0.4277	0.3939	0.3666	0.3861	0.3655	0.2906	0.3768	0.2939	0.3443	0.4026	0.4769	0.3259	0.631	0.4868	0.3825	0.379
SY-D	0.0485	0.2549	0.3321	0.1554	0.2018	0.185	0.4788	0.2392	0.3671	0.5382	0.069	0	0.5204	0.5518	0.5922	0.2511	0.4449	0.4657	0.4339	0.2981	0.541	0.53	0.4946	0.2136	0.1081	0.4913	0.2952	0.3253	0.3239	0.2103	0.3261	0.3957	0.3119	0.3812	0.3339	0.3097	0.3318	0.3443	0.2461	0.3217	0.2926	0.2818	0.361	0.4227	0.2689	0.6278	0.4281	0.3212	0.3704
Tumbling Run	0.5525	0.5385	0.5633	0.5092	0.5802	0.5694	0.82	0.7075	0.4038	0.26	0.5692	0.5204	0	0.2667	0.5	0.4655	0.4355	0.5	0.2805	0.3974	0.4509	0.2908	0.2915	0.5637	0.5815	0.3193	0.4849	0.4724	0.4981	0.4593	0.4174	0.4358	0.5007	0.4467	0.4242	0.4225	0.4097	0.4301	0.4561	0.3907	0.4597	0.4194	0.4615	0.3272	0.3599	0.2876	0.3029	0.3577	0.4704
Pottsville Fm	0.5657	0.4797	0.4855	0.5742	0.6361	0.5662	0.8171	0.7742	0.2542	0.192	0.6088	0.5518	0.2667	0	0.2893	0.3831	0.2979	0.2691	0.1644	0.2888	0.2188	0.0511	0.1521	0.5283	0.5401	0.1241	0.3028	0.2528	0.2771	0.3949	0.2501	0.2488	0.3132	0.2199	0.2706	0.2889	0.2404	0.2537	0.3399	0.2607	0.3267	0.3007	0.2182	0.1645	0.3133	0.2281	0.1902	0.2489	0.2369
Pocohontas	0.6126	0.4948	0.4954	0.5516	0.6693	0.5947	0.8634	0.7927	0.2574	0.3617	0.6374	0.5922	0.5	0.2893	0	0.4016	0.2172	0.2163	0.2579	0.3096	0.1191	0.2856	0.3169	0.5909	0.6172	0.2996	0.3422	0.2974	0.3308	0.4227	0.325	0.2149	0.3163	0.268	0.2778	0.3123	0.2709	0.3239	0.3883	0.3123	0.3785	0.3301	0.2672	0.2265	0.3529	0.4604	0.2162	0.2781	0.2971
Lee	0.2424	0.2351	0.2511	0.2528	0.3019	0.241	0.5387	0.401	0.2298	0.4125	0.2605	0.2511	0.4655	0.3831	0.4016	0	0.25	0.3056	0.2536	0.1489	0.3869	0.3652	0.3648	0.2638	0.2362	0.3076	0.125	0.1698	0.1263	0.1267	0.1542	0.2431	0.1324	0.1972	0.1533	0.1479	0.183	0.147	0.1174	0.2338	0.1457	0.1421	0.226	0.2407	0.1571	0.4978	0.2673	0.1742	0.1668
Racoon	0.447	0.3908	0.3744	0.4506	0.5078	0.4314	0.684	0.6363	0.2376	0.4482	0.4741	0.4449	0.4355	0.2979	0.2172	0.25	0	0.1748	0.292	0.1814	0.1987	0.3285	0.3922	0.4048	0.4306	0.2934	0.1759	0.1546	0.1448	0.275	0.1924	0.138	0.164	0.1373	0.1863	0.1783	0.2307	0.2103	0.2294	0.2924	0.1964	0.1898	0.262	0.2133	0.2063	0.4902	0.2622	0.1972	0.1727
Montevallo	0.4907	0.419	0.4062	0.4367	0.5674	0.5033	0.7935	0.6768	0.1368	0.4096	0.5243	0.4657	0.5	0.2691	0.2163	0.3056	0.1748	0	0.2514	0.1898	0.1192	0.2423	0.3707	0.5251	0.4889	0.2015	0.2569	0.1992	0.2071	0.2987	0.2286	0.17	0.2348	0.1738	0.1742	0.1987	0.2111	0.2036	0.2632	0.2542	0.2527	0.2043	0.135	0.179	0.248	0.4348	0.2201	0.1579	0.1995
Sewanee	0.4395	0.3902	0.4393	0.4617	0.5083	0.4376	0.6657	0.6327	0.1337	0.1868	0.4713	0.4339	0.2805	0.1644	0.2579	0.2536	0.292	0.2514	0	0.1928	0.2224	0.168	0.1594	0.3876	0.4117	0.1131	0.2742	0.2676	0.2892	0.2813	0.1828	0.2063	0.277	0.1976	0.1741	0.1702	0.1825	0.1566	0.2647	0.1664	0.2075	0.1898	0.1964	0.131	0.1853	0.275	0.1577	0.1431	0.244
KY-18-CB	0.3182	0.2729	0.3021	0.3068	0.3892	0.3421	0.6421	0.5202	0.1477	0.3295	0.3589	0.2981	0.3974	0.2888	0.3096	0.1489	0.1814	0.1898	0.1928	0	0.2817	0.2571	0.2943	0.3679	0.3191	0.2115	0.1073	0.0906	0.1149	0.1503	0.073	0.1365	0.1244	0.1035	0.0799	0.0529	0.125	0.1061	0.1111	0.1677	0.0844	0.076	0.1407	0.1434	0.1106	0.3915	0.1796	0.0725	0.0975
VA-1-GN	0.5708	0.4459	0.4514	0.5183	0.6392	0.5604	0.8272	0.7581	0.2075	0.3611	0.6015	0.541	0.4509	0.2188	0.1191	0.3869	0.1987	0.1192	0.2224	0.2817	0	0.2056	0.3459	0.573	0.5953	0.1915	0.3097	0.2639	0.2988	0.3835	0.292	0.1563	0.2688	0.2461	0.2429	0.2869	0.2417	0.2882	0.3575	0.2669	0.3412	0.2891	0.2307	0.1972	0.331	0.37	0.1655	0.2372	0.2582
OH-4-SN	0.5305	0.4828	0.4784	0.5419	0.6055	0.5283	0.8023	0.738	0.2193	0.1767	0.5714	0.53	0.2908	0.0511	0.2856	0.3652	0.3285	0.2423	0.168	0.2571	0.2056	0	0.1565	0.5206	0.5371	0.1038	0.288	0.2597	0.2773	0.3565	0.2396	0.2371	0.297	0.2066	0.2356	0.2657	0.2145	0.2382	0.3081	0.2382	0.3007	0.2707	0.1931	0.1464	0.2855	0.2282	0.1592	0.2213	0.2281
OH-1-SS	0.5142	0.5041	0.4939	0.506	0.5865	0.5158	0.781	0.7207	0.2639	0.123	0.5558	0.4946	0.2915	0.1521	0.3169	0.3648	0.3922	0.3707	0.1594	0.2943	0.3459	0.1565	0	0.5147	0.5079	0.2103	0.3985	0.3811	0.3992	0.3839	0.2685	0.2734	0.3905	0.3159	0.2481	0.2641	0.2081	0.2532	0.3536	0.201	0.2874	0.3006	0.2699	0.2325	0.2599	0.2324	0.1939	0.2527	0.3543
Watahomigi	0.1672	0.3152	0.3622	0.2418	0.2806	0.1214	0.3103	0.3152	0.476	0.4984	0.1952	0.2136	0.5637	0.5283	0.5909	0.2638	0.4048	0.5251	0.3876	0.3679	0.573	0.5206	0.5147	0	0.1669	0.4339	0.2931	0.3542	0.3288	0.2548	0.3329	0.4781	0.3569	0.362	0.3988	0.3764	0.417	0.3709	0.3223	0.3575	0.3495	0.3978	0.4452	0.454	0.2843	0.575	0.494	0.3831	0.3363
Manakacha1	0.069	0.2976	0.3792	0.19	0.2055	0.14	0.4113	0.251	0.4181	0.524	0.0958	0.1081	0.5815	0.5401	0.6172	0.2362	0.4306	0.4889	0.4117	0.3191	0.5953	0.5371	0.5079	0.1669	0	0.4472	0.2929	0.3387	0.3068	0.2342	0.3106	0.439	0.3558	0.3681	0.3848	0.312	0.3733	0.3145	0.2542	0.3491	0.2674	0.3235	0.3738	0.4348	0.2643	0.6016	0.4801	0.3766	0.3371
BCRA-01-10	0.476	0.4512	0.4846	0.4829	0.5314	0.4551	0.7291	0.66	0.158	0.2311	0.4966	0.4913	0.3193	0.1241	0.2996	0.3076	0.2934	0.2015	0.1131	0.2115	0.1915	0.1038	0.2103	0.4339	0.4472	0	0.3046	0.2507	0.2469	0.3252	0.1896	0.2601	0.3236	0.2234	0.1964	0.2192	0.183	0.1774	0.3152	0.2096	0.2186	0.2396	0.15	0.1239	0.2314	0.2541	0.1206	0.1904	0.1745
MB1-3	0.301	0.2524	0.2396	0.3104	0.3731	0.2952	0.5628	0.5081	0.2129	0.4087	0.3403	0.2952	0.4849	0.3028	0.3422	0.125	0.1759	0.2569	0.2742	0.1073	0.3097	0.288	0.3985	0.2931	0.2929	0.3046	0	0.0883	0.0819	0.1329	0.1505	0.2027	0.093	0.1487	0.1572	0.1398	0.2249	0.2038	0.0956	0.2649	0.1463	0.127	0.2168	0.2205	0.1464	0.4802	0.2181	0.1495	0.1543
MB2-4	0.3427	0.2713	0.2781	0.3326	0.4087	0.3376	0.6226	0.5425	0.1506	0.4028	0.3811	0.3253	0.4724	0.2528	0.2974	0.1698	0.1546	0.1992	0.2676	0.0906	0.2639	0.2597	0.3811	0.3542	0.3387	0.2507	0.0883	0	0.0581	0.1762	0.1429	0.1355	0.0943	0.0891	0.1537	0.1238	0.2094	0.1431	0.1097	0.2514	0.1315	0.1073	0.1746	0.1666	0.133	0.4154	0.1991	0.14	0.0992
MB2-2	0.3195	0.2877	0.285	0.326	0.3922	0.3223	0.5864	0.5273	0.1989	0.4214	0.3589	0.3239	0.4981	0.2771	0.3308	0.1263	0.1448	0.2071	0.2892	0.1149	0.2988	0.2773	0.3992	0.3288	0.3068	0.2469	0.0819	0.0581	0	0.151	0.1632	0.1801	0.0947	0.11	0.1667	0.1525	0.2256	0.1647	0.1087	0.2757	0.147	0.1127	0.2009	0.1886	0.1573	0.433	0.229	0.1537	0.1058
MB2-3	0.211	0.1777	0.2059	0.2056	0.2786	0.2322	0.5322	0.4158	0.2413	0.4548	0.2499	0.2103	0.4593	0.3949	0.4227	0.1267	0.275	0.2987	0.2813	0.1503	0.3835	0.3565	0.3839	0.2548	0.2342	0.3252	0.1329	0.1762	0.151	0	0.1839	0.2345	0.1479	0.2227	0.1728	0.1579	0.2145	0.2333	0.1193	0.2794	0.1634	0.1728	0.2503	0.2754	0.1512	0.5146	0.2643	0.176	0.2036
MB2-5	0.3317	0.3032	0.3332	0.3355	0.4004	0.3297	0.6014	0.5333	0.1961	0.3183	0.3679	0.3261	0.4174	0.2501	0.325	0.1542	0.1924	0.2286	0.1828	0.073	0.292	0.2396	0.2685	0.3329	0.3106	0.1896	0.1505	0.1429	0.1632	0.1839	0	0.1651	0.1676	0.0734	0.1166	0.0887	0.1359	0.0907	0.1497	0.1721	0.0997	0.1195	0.1581	0.173	0.097	0.3706	0.2169	0.1039	0.1177
MB2-1	0.4251	0.3159	0.321	0.4089	0.4907	0.4573	0.7481	0.6258	0.1505	0.3274	0.4596	0.3957	0.4358	0.2488	0.2149	0.2431	0.138	0.17	0.2063	0.1365	0.1563	0.2371	0.2734	0.4781	0.439	0.2601	0.2027	0.1355	0.1801	0.2345	0.1651	0	0.1528	0.1743	0.0992	0.1454	0.1125	0.1457	0.2104	0.1721	0.1944	0.1438	0.162	0.1667	0.2103	0.418	0.1612	0.0993	0.1841
MB1-2	0.3221	0.2808	0.2679	0.3243	0.3886	0.3437	0.6226	0.5236	0.2353	0.4261	0.3518	0.3119	0.5007	0.3132	0.3163	0.1324	0.164	0.2348	0.277	0.1244	0.2688	0.297	0.3905	0.3569	0.3558	0.3236	0.093	0.0943	0.0947	0.1479	0.1676	0.1528	0	0.1374	0.1668	0.1379	0.2188	0.2226	0.113	0.2631	0.149	0.1167	0.2316	0.2326	0.1551	0.5097	0.2335	0.151	0.1811
MB1-1	0.3891	0.3399	0.3267	0.3747	0.4632	0.3933	0.6404	0.5982	0.1321	0.3424	0.4277	0.3812	0.4467	0.2199	0.268	0.1972	0.1373	0.1738	0.1976	0.1035	0.2461	0.2066	0.3159	0.362	0.3681	0.2234	0.1487	0.0891	0.11	0.2227	0.0734	0.1743	0.1374	0	0.128	0.1119	0.1527	0.1116	0.1645	0.218	0.1558	0.1316	0.1464	0.1488	0.1294	0.3997	0.1637	0.1105	0.0823
16	0.3634	0.2935	0.3295	0.3361	0.4083	0.377	0.6748	0.5374	0.0944	0.2933	0.3939	0.3339	0.4242	0.2706	0.2778	0.1533	0.1863	0.1742	0.1741	0.0799	0.2429	0.2356	0.2481	0.3988	0.3848	0.1964	0.1572	0.1537	0.1667	0.1728	0.1166	0.0992	0.1668	0.128	0	0.0729	0.0764	0.1002	0.1543	0.1268	0.1305	0.0899	0.0985	0.124	0.1306	0.3874	0.1556	0.0855	0.1415
23	0.3278	0.2863	0.3034	0.3286	0.3927	0.3546	0.6448	0.5291	0.1323	0.306	0.3666	0.3097	0.4225	0.2889	0.3123	0.1479	0.1783	0.1987	0.1702	0.0529	0.2869	0.2657	0.2641	0.3764	0.312	0.2192	0.1398	0.1238	0.1525	0.1579	0.0887	0.1454	0.1379	0.1119	0.0729	0	0.0924	0.109	0.1221	0.1461	0.0914	0.0605	0.1356	0.1476	0.1095	0.3961	0.1838	0.0772	0.1015
29	0.3562	0.3333	0.3405	0.3596	0.4303	0.3908	0.6713	0.5479	0.0922	0.2403	0.3861	0.3318	0.4097	0.2404	0.2709	0.183	0.2307	0.2111	0.1825	0.125	0.2417	0.2145	0.2081	0.417	0.3733	0.183	0.2249	0.2094	0.2256	0.2145	0.1359	0.1125	0.2188	0.1527	0.0764	0.0924	0	0.0875	0.176	0.097	0.1285	0.1363	0.1037	0.1136	0.1472	0.3671	0.1293	0.0793	0.1813
38	0.3332	0.3191	0.3368	0.3524	0.399	0.349	0.6393	0.5304	0.1442	0.2777	0.3655	0.3443	0.4301	0.2537	0.3239	0.147	0.2103	0.2036	0.1566	0.1061	0.2882	0.2382	0.2532	0.3709	0.3145	0.1774	0.2038	0.1431	0.1647	0.2333	0.0907	0.1457	0.2226	0.1116	0.1002	0.109	0.0875	0	0.2	0.1419	0.1051	0.1487	0.0916	0.1526	0.0971	0.3649	0.1919	0.105	0.1229
48	0.2533	0.2005	0.2023	0.2563	0.3274	0.3003	0.5927	0.4624	0.2343	0.4157	0.2906	0.2461	0.4561	0.3399	0.3883	0.1174	0.2294	0.2632	0.2647	0.1111	0.3575	0.3081	0.3536	0.3223	0.2542	0.3152	0.0956	0.1097	0.1087	0.1193	0.1497	0.2104	0.113	0.1645	0.1543	0.1221	0.176	0.2	0	0.2404	0.145	0.0978	0.2367	0.2255	0.1417	0.4878	0.2463	0.1503	0.1654
49	0.3357	0.3976	0.392	0.3495	0.4049	0.3366	0.6367	0.5382	0.1486	0.2487	0.3768	0.3217	0.3907	0.2607	0.3123	0.2338	0.2924	0.2542	0.1664	0.1677	0.2669	0.2382	0.201	0.3575	0.3491	0.2096	0.2649	0.2514	0.2757	0.2794	0.1721	0.1721	0.2631	0.218	0.1268	0.1461	0.097	0.1419	0.2404	0	0.1719	0.1831	0.1636	0.141	0.1392	0.3514	0.1712	0.1228	0.2315
50	0.2784	0.2823	0.3269	0.2861	0.3353	0.325	0.6152	0.4574	0.1644	0.2975	0.2939	0.2926	0.4597	0.3267	0.3785	0.1457	0.1964	0.2527	0.2075	0.0844	0.3412	0.3007	0.2874	0.3495	0.2674	0.2186	0.1463	0.1315	0.147	0.1634	0.0997	0.1944	0.149	0.1558	0.1305	0.0914	0.1285	0.1051	0.145	0.1719	0	0.0806	0.1293	0.2004	0.1249	0.3945	0.2291	0.1157	0.1119
46-1	0.3098	0.2619	0.2866	0.2865	0.3631	0.3733	0.6636	0.5022	0.1616	0.3407	0.3443	0.2818	0.4194	0.3007	0.3301	0.1421	0.1898	0.2043	0.1898	0.076	0.2891	0.2707	0.3006	0.3978	0.3235	0.2396	0.127	0.1073	0.1127	0.1728	0.1195	0.1438	0.1167	0.1316	0.0899	0.0605	0.1363	0.1487	0.0978	0.1831	0.0806	0	0.1723	0.1719	0.1279	0.4326	0.1784	0.0859	0.1129
46-2	0.3603	0.3597	0.4095	0.3685	0.434	0.4204	0.7106	0.5658	0.0942	0.2882	0.4026	0.361	0.4615	0.2182	0.2672	0.226	0.262	0.135	0.1964	0.1407	0.2307	0.1931	0.2699	0.4452	0.3738	0.15	0.2168	0.1746	0.2009	0.2503	0.1581	0.162	0.2316	0.1464	0.0985	0.1356	0.1037	0.0916	0.2367	0.1636	0.1293	0.1723	0	0.1421	0.1681	0.3963	0.1854	0.1116	0.1406
IB_AD	0.4353	0.4039	0.3924	0.4337	0.5067	0.4401	0.7103	0.6417	0.1061	0.2664	0.4769	0.4227	0.3272	0.1645	0.2265	0.2407	0.2133	0.179	0.131	0.1434	0.1972	0.1464	0.2325	0.454	0.4348	0.1239	0.2205	0.1666	0.1886	0.2754	0.173	0.1667	0.2326	0.1488	0.124	0.1476	0.1136	0.1526	0.2255	0.141	0.2004	0.1719	0.1421	0	0.184	0.3086	0.0778	0.1289	0.1746
IB_M1	0.2871	0.2798	0.3265	0.2764	0.3517	0.2746	0.5526	0.4883	0.2	0.3094	0.3259	0.2689	0.3599	0.3133	0.3529	0.1571	0.2063	0.248	0.1853	0.1106	0.331	0.2855	0.2599	0.2843	0.2643	0.2314	0.1464	0.133	0.1573	0.1512	0.097	0.2103	0.1551	0.1294	0.1306	0.1095	0.1472	0.0971	0.1417	0.1392	0.1249	0.1279	0.1681	0.184	0	0.3795	0.224	0.1291	0.1272
IB_M2	0.619	0.588	0.687	0.6141	0.6839	0.5959	0.818	0.785	0.3308	0.1712	0.631	0.6278	0.2876	0.2281	0.4604	0.4978	0.4902	0.4348	0.275	0.3915	0.37	0.2282	0.2324	0.575	0.6016	0.2541	0.4802	0.4154	0.433	0.5146	0.3706	0.418	0.5097	0.3997	0.3874	0.3961	0.3671	0.3649	0.4878	0.3514	0.3945	0.4326	0.3963	0.3086	0.3795	0	0.3019	0.3921	0.4008
FCB_AD	0.4556	0.3573	0.4112	0.4057	0.5217	0.4763	0.7547	0.6264	0.1086	0.2377	0.4868	0.4281	0.3029	0.1902	0.2162	0.2673	0.2622	0.2201	0.1577	0.1796	0.1655	0.1592	0.1939	0.494	0.4801	0.1206	0.2181	0.1991	0.229	0.2643	0.2169	0.1612	0.2335	0.1637	0.1556	0.1838	0.1293	0.1919	0.2463	0.1712	0.2291	0.1784	0.1854	0.0778	0.224	0.3019	0	0.1202	0.1827
FCB_A2	0.3448	0.3088	0.3299	0.3293	0.4157	0.3644	0.6543	0.5454	0.1004	0.288	0.3825	0.3212	0.3577	0.2489	0.2781	0.1742	0.1972	0.1579	0.1431	0.0725	0.2372	0.2213	0.2527	0.3831	0.3766	0.1904	0.1495	0.14	0.1537	0.176	0.1039	0.0993	0.151	0.1105	0.0855	0.0772	0.0793	0.105	0.1503	0.1228	0.1157	0.0859	0.1116	0.1289	0.1291	0.3921	0.1202	0	0.1284
FCB_A1	0.355	0.3272	0.3527	0.3627	0.4127	0.3419	0.6006	0.5472	0.1493	0.3803	0.379	0.3704	0.4704	0.2369	0.2971	0.1668	0.1727	0.1995	0.244	0.0975	0.2582	0.2281	0.3543	0.3363	0.3371	0.1745	0.1543	0.0992	0.1058	0.2036	0.1177	0.1841	0.1811	0.0823	0.1415	0.1015	0.1813	0.1229	0.1654	0.2315	0.1119	0.1129	0.1406	0.1746	0.1272	0.4008	0.1827	0.1284	0
S3	0.4068	0.418	0.4744	0.4131	0.4623	0.3922	0.6619	0.5971	0.131	0.1723	0.4322	0.4186	0.352	0.187	0.2584	0.2887	0.3158	0.2483	0.1665	0.1811	0.2148	0.162	0.153	0.3901	0.4019	0.0895	0.2711	0.2449	0.27	0.2911	0.15	0.2174	0.2942	0.1941	0.1598	0.1815	0.1421	0.1456	0.2826	0.1334	0.1717	0.2144	0.17	0.1261	0.1572	0.2427	0.1177	0.153	0.2246
O_M source	0.4643	0.3092	0.3463	0.3952	0.5346	0.4698	0.7317	0.6536	0.1676	0.4213	0.4931	0.4409	0.5287	0.2889	0.2674	0.2796	0.1571	0.152	0.2884	0.1813	0.2126	0.274	0.4072	0.4752	0.4819	0.2394	0.2205	0.1621	0.1907	0.2726	0.1956	0.1574	0.1677	0.1457	0.1946	0.1874	0.2368	0.1864	0.2575	0.2846	0.2379	0.1805	0.1865	0.218	0.2272	0.432	0.2321	0.1753	0.1551
Central_App_Crys	0.5181	0.4108	0.4102	0.4985	0.5923	0.5396	0.8031	0.7079	0.1659	0.2883	0.5458	0.494	0.4268	0.1743	0.1518	0.336	0.2066	0.1288	0.1984	0.2404	0.0893	0.1624	0.2656	0.5505	0.5435	0.1594	0.2836	0.231	0.2566	0.3284	0.271	0.1234	0.2239	0.2023	0.1992	0.2446	0.1881	0.25	0.3108	0.2293	0.2898	0.2358	0.1827	0.1435	0.2878	0.3654	0.1589	0.1904	0.225
N_Appalachian	0.4673	0.5456	0.5451	0.4869	0.538	0.4656	0.7254	0.6739	0.3103	0.099	0.5029	0.474	0.2026	0.1745	0.3924	0.3894	0.432	0.4264	0.2044	0.3272	0.3736	0.1924	0.1636	0.4499	0.4579	0.2429	0.4223	0.4036	0.4255	0.4237	0.3326	0.3284	0.4155	0.3683	0.2825	0.296	0.2536	0.3044	0.3846	0.239	0.3338	0.3384	0.319	0.2538	0.282	0.1749	0.2177	0.2768	0.3842
NW_Arctic	0.2959	0.4309	0.4813	0.4586	0.4816	0.3306	0.4547	0.5264	0.4849	0.5317	0.2957	0.3165	0.5988	0.5681	0.6259	0.3593	0.4342	0.5375	0.4298	0.411	0.5981	0.5423	0.5235	0.2515	0.3164	0.4649	0.3686	0.3853	0.3772	0.3236	0.3726	0.5069	0.3992	0.387	0.4272	0.4223	0.4517	0.4103	0.403	0.3948	0.382	0.4286	0.4615	0.4688	0.3346	0.598	0.5058	0.4299	0.3478
NE_Arctic	0.1562	0.271	0.2894	0.2767	0.2829	0.1687	0.4232	0.3408	0.3299	0.4222	0.1717	0.1694	0.4594	0.441	0.4961	0.2122	0.3234	0.378	0.3182	0.2277	0.4624	0.4082	0.3915	0.1524	0.2127	0.3512	0.1853	0.2207	0.1969	0.1659	0.2092	0.3313	0.2287	0.2671	0.2536	0.2277	0.2778	0.2204	0.2138	0.2202	0.2075	0.2571	0.3014	0.3261	0.1584	0.4825	0.3619	0.2512	0.2257
Sonora	0.2902	0.4166	0.465	0.4093	0.4511	0.291	0.4281	0.4882	0.576	0.6867	0.3139	0.3261	0.6682	0.7206	0.7405	0.3795	0.5884	0.6318	0.5898	0.4833	0.7092	0.686	0.6668	0.2077	0.2956	0.6141	0.4542	0.4927	0.4706	0.3664	0.4797	0.5901	0.4656	0.5416	0.5103	0.4812	0.5187	0.4805	0.4432	0.4884	0.4535	0.4991	0.551	0.5851	0.4405	0.7436	0.5946	0.5006	0.4932
KDE Like	AZShelf1	MS11	MS10	MS01	MSGE313	BC01	BC02	CC01	ML01	MP-DZ1	1QZ19	SY-D	Tumbling Run	Pottsville Fm	Pocohontas	Lee	Racoon	Montevallo	Sewanee	KY-18-CB	VA-1-GN	OH-4-SN	OH-1-SS	Watahomigi	Manakacha1	BCRA-01-10	MB1-3	MB2-4	MB2-2	MB2-3	MB2-5	MB2-1	MB1-2	MB1-1	16	23	29	38	48	49	50	46-1	46-2	IB_AD	IB_M1	IB_M2	FCB_AD	FCB_A2	FCB_A1
AZShelf1	1	0.6053	0.5103	0.5958	0.3899	0.6818	0.2776	0.296	0.5909	0.4756	0.8913	0.8951	0.497	0.4345	0.3452	0.6985	0.5379	0.4635	0.5705	0.6558	0.4104	0.4699	0.4693	0.8034	0.8322	0.5111	0.6457	0.624	0.6256	0.7297	0.6411	0.5576	0.6263	0.5863	0.6363	0.6556	0.6276	0.6594	0.7064	0.6475	0.6741	0.6778	0.5897	0.5808	0.6829	0.397	0.5611	0.6498	0.5235
MS11	0.6053	1	0.771	0.7239	0.4827	0.5495	0.2699	0.3706	0.577	0.4597	0.5638	0.6154	0.3366	0.4815	0.5227	0.6602	0.5694	0.6032	0.5425	0.6083	0.5635	0.528	0.4328	0.5797	0.633	0.5069	0.6367	0.6437	0.6683	0.6947	0.6183	0.6158	0.6854	0.5862	0.6285	0.5982	0.6	0.6008	0.6418	0.5242	0.5904	0.6392	0.5689	0.5685	0.6113	0.3944	0.6171	0.6392	0.5508
MS10	0.5103	0.771	1	0.6865	0.4985	0.5087	0.2802	0.4987	0.4697	0.4002	0.4701	0.5322	0.2974	0.4235	0.4907	0.5632	0.5438	0.5558	0.454	0.5326	0.5031	0.4767	0.3863	0.5004	0.5305	0.4695	0.5486	0.5579	0.5722	0.594	0.5156	0.5419	0.6094	0.5126	0.5455	0.5009	0.5243	0.4917	0.562	0.4282	0.4889	0.5527	0.4553	0.4976	0.5072	0.34	0.5363	0.5453	0.4922
MS01	0.5958	0.7239	0.6865	1	0.5415	0.6188	0.3962	0.5239	0.5104	0.4136	0.5575	0.6096	0.3568	0.3806	0.4277	0.5584	0.4721	0.4813	0.4686	0.5322	0.4771	0.4347	0.4116	0.5941	0.6012	0.4442	0.5144	0.5188	0.5285	0.6093	0.5159	0.5221	0.5726	0.4711	0.5596	0.5204	0.5447	0.5101	0.5627	0.4703	0.5159	0.5578	0.4825	0.4868	0.557	0.3418	0.5666	0.5603	0.4542
MSGE313	0.3899	0.4827	0.4985	0.5415	1	0.4199	0.3922	0.435	0.3578	0.3026	0.3648	0.3965	0.2274	0.2803	0.2968	0.3951	0.3264	0.3396	0.3253	0.3493	0.3258	0.3078	0.2813	0.3714	0.404	0.319	0.3711	0.3658	0.3704	0.4153	0.3623	0.3574	0.402	0.3355	0.382	0.363	0.3763	0.3484	0.3961	0.3365	0.3788	0.3871	0.3563	0.3512	0.3783	0.2527	0.3725	0.3935	0.3416
BC01	0.6818	0.5495	0.5087	0.6188	0.4199	1	0.4539	0.4135	0.494	0.4661	0.6317	0.662	0.4182	0.4013	0.3455	0.6268	0.5195	0.4397	0.5374	0.6037	0.4167	0.4582	0.4331	0.7364	0.7083	0.4891	0.6132	0.597	0.5746	0.6581	0.6168	0.515	0.5839	0.5306	0.5731	0.5818	0.576	0.5633	0.6191	0.5825	0.5902	0.5977	0.53	0.5284	0.6116	0.3605	0.5254	0.5905	0.4952
BC02	0.2776	0.2699	0.2802	0.3962	0.3922	0.4539	1	0.469	0.1267	0.1253	0.2616	0.2848	0.1439	0.0867	0.0504	0.2128	0.1556	0.1054	0.1626	0.1889	0.0912	0.1108	0.0964	0.3143	0.2853	0.137	0.1923	0.1806	0.1851	0.23	0.1873	0.1391	0.1825	0.1331	0.1764	0.1805	0.1697	0.1803	0.2008	0.1649	0.1822	0.1859	0.1622	0.1433	0.2051	0.083	0.1652	0.188	0.14
CC01	0.296	0.3706	0.4987	0.5239	0.435	0.4135	0.469	1	0.19	0.1591	0.2891	0.3099	0.1702	0.1038	0.1096	0.2189	0.1646	0.1608	0.1542	0.2135	0.153	0.149	0.1348	0.3053	0.2765	0.1525	0.206	0.1973	0.1915	0.2472	0.1922	0.1976	0.206	0.1473	0.2175	0.2024	0.2168	0.1881	0.2304	0.1798	0.2068	0.2329	0.1681	0.1765	0.2055	0.0963	0.2288	0.228	0.1427
ML01	0.5909	0.577	0.4697	0.5104	0.3578	0.494	0.1267	0.19	1	0.6745	0.5751	0.6019	0.497	0.6896	0.6011	0.6653	0.558	0.7187	0.6693	0.7482	0.6954	0.7279	0.6218	0.5332	0.5633	0.7568	0.6682	0.712	0.6651	0.6996	0.6683	0.7173	0.6769	0.683	0.7438	0.7295	0.7241	0.7423	0.6918	0.693	0.7326	0.7537	0.737	0.7383	0.726	0.6013	0.8083	0.7698	0.669
MP-DZ1	0.4756	0.4597	0.4002	0.4136	0.3026	0.4661	0.1253	0.1591	0.6745	1	0.4416	0.4784	0.6041	0.7812	0.5869	0.6407	0.6047	0.6702	0.7961	0.6646	0.5784	0.7272	0.7005	0.5124	0.4912	0.7548	0.6386	0.6616	0.6335	0.6178	0.7398	0.7014	0.6103	0.6938	0.7477	0.7254	0.7709	0.7014	0.6495	0.7578	0.6924	0.6985	0.661	0.7893	0.6837	0.6193	0.7646	0.753	0.6
1QZ19	0.8913	0.5638	0.4701	0.5575	0.3648	0.6317	0.2616	0.2891	0.5751	0.4416	1	0.8464	0.4825	0.3969	0.3063	0.6489	0.4848	0.4205	0.5318	0.6134	0.3764	0.4309	0.4371	0.7272	0.7644	0.4765	0.589	0.5711	0.5787	0.6866	0.5888	0.5158	0.5748	0.5275	0.5935	0.6106	0.5864	0.6112	0.6626	0.5975	0.6442	0.6402	0.5361	0.5368	0.6384	0.3706	0.5348	0.6159	0.4809
SY-D	0.8951	0.6154	0.5322	0.6096	0.3965	0.662	0.2848	0.3099	0.6019	0.4784	0.8464	1	0.4991	0.4402	0.3672	0.6897	0.5419	0.4859	0.5766	0.6591	0.4421	0.468	0.4853	0.7706	0.8279	0.5141	0.6518	0.6456	0.6275	0.7582	0.6513	0.5896	0.6441	0.5974	0.6705	0.6801	0.6557	0.6675	0.7352	0.6562	0.665	0.7162	0.5933	0.5915	0.6908	0.3805	0.5899	0.6695	0.5048
Tumbling Run	0.497	0.3366	0.2974	0.3568	0.2274	0.4182	0.1439	0.1702	0.497	0.6041	0.4825	0.4991	1	0.5193	0.3316	0.469	0.4436	0.4026	0.5343	0.4715	0.3594	0.45	0.5155	0.4933	0.4433	0.5037	0.4743	0.4874	0.4469	0.4903	0.501	0.4806	0.4217	0.4687	0.5342	0.5188	0.5689	0.4889	0.5144	0.5781	0.4722	0.5138	0.4269	0.5946	0.5236	0.4635	0.5285	0.5545	0.4004
Pottsville Fm	0.4345	0.4815	0.4235	0.3806	0.2803	0.4013	0.0867	0.1038	0.6896	0.7812	0.3969	0.4402	0.5193	1	0.7099	0.6127	0.6861	0.7081	0.7937	0.6804	0.6868	0.7663	0.6756	0.469	0.4434	0.7814	0.7068	0.7281	0.6765	0.5974	0.7003	0.764	0.6677	0.7416	0.7015	0.7044	0.7032	0.6607	0.6651	0.659	0.6161	0.6892	0.604	0.7966	0.6827	0.622	0.7498	0.7333	0.6033
Pocohontas	0.3452	0.5227	0.4907	0.4277	0.2968	0.3455	0.0504	0.1096	0.6011	0.5869	0.3063	0.3672	0.3316	0.7099	1	0.6159	0.6497	0.806	0.5599	0.6012	0.7674	0.6427	0.5621	0.31	0.3988	0.6093	0.6365	0.6657	0.6461	0.5492	0.6245	0.7673	0.6849	0.6829	0.6701	0.6356	0.65	0.584	0.6159	0.5785	0.5966	0.6367	0.6015	0.6508	0.5114	0.4417	0.6175	0.6161	0.5677
Lee	0.6985	0.6602	0.5632	0.5584	0.3951	0.6268	0.2128	0.2189	0.6653	0.6407	0.6489	0.6897	0.469	0.6127	0.6159	1	0.6102	0.7254	0.7322	0.741	0.5429	0.6049	0.5368	0.6381	0.763	0.6748	0.7883	0.774	0.7971	0.828	0.8555	0.77	0.7815	0.7592	0.8308	0.8225	0.8109	0.7895	0.8445	0.7611	0.8536	0.8398	0.7362	0.734	0.7527	0.4705	0.6592	0.7682	0.6838
Racoon	0.5379	0.5694	0.5438	0.4721	0.3264	0.5195	0.1556	0.1646	0.558	0.6047	0.4848	0.5419	0.4436	0.6861	0.6497	0.6102	1	0.6427	0.6762	0.6766	0.6911	0.6783	0.5546	0.5865	0.5529	0.6745	0.7634	0.7633	0.7421	0.6641	0.7042	0.6841	0.7734	0.7621	0.649	0.6691	0.6328	0.6524	0.6519	0.5942	0.591	0.667	0.5494	0.7149	0.6596	0.5246	0.6418	0.6735	0.6436
Montevallo	0.4635	0.6032	0.5558	0.4813	0.3396	0.4397	0.1054	0.1608	0.7187	0.6702	0.4205	0.4859	0.4026	0.7081	0.806	0.7254	0.6427	1	0.6191	0.7019	0.7485	0.7336	0.614	0.4047	0.5214	0.7114	0.729	0.767	0.771	0.6673	0.7255	0.8343	0.7665	0.7857	0.784	0.735	0.7599	0.7286	0.7189	0.6934	0.7314	0.7504	0.7477	0.7488	0.6096	0.5149	0.7189	0.713	0.6943
Sewanee	0.5705	0.5425	0.454	0.4686	0.3253	0.5374	0.1626	0.1542	0.6693	0.7961	0.5318	0.5766	0.5343	0.7937	0.5599	0.7322	0.6762	0.6191	1	0.7333	0.5758	0.7135	0.6542	0.5959	0.5971	0.7719	0.7396	0.7424	0.7258	0.7162	0.7892	0.6922	0.7151	0.7842	0.7477	0.7871	0.7288	0.7558	0.723	0.7369	0.7126	0.7706	0.6638	0.8071	0.7996	0.5985	0.7656	0.7917	0.6574
KY-18-CB	0.6558	0.6083	0.5326	0.5322	0.3493	0.6037	0.1889	0.2135	0.7482	0.6646	0.6134	0.6591	0.4715	0.6804	0.6012	0.741	0.6766	0.7019	0.7333	1	0.6499	0.7319	0.6018	0.637	0.678	0.7223	0.7964	0.8232	0.7855	0.7705	0.7747	0.7521	0.7581	0.7793	0.7582	0.8117	0.7287	0.8048	0.745	0.7037	0.7581	0.8016	0.7482	0.7665	0.8175	0.5823	0.778	0.8014	0.7435
VA-1-GN	0.4104	0.5635	0.5031	0.4771	0.3258	0.4167	0.0912	0.153	0.6954	0.5784	0.3764	0.4421	0.3594	0.6868	0.7674	0.5429	0.6911	0.7485	0.5758	0.6499	1	0.7418	0.5954	0.3961	0.4291	0.6666	0.6745	0.71	0.672	0.6081	0.61	0.7357	0.7201	0.695	0.6484	0.6292	0.6286	0.6167	0.6036	0.5646	0.5717	0.6508	0.6558	0.684	0.5819	0.5477	0.7062	0.674	0.6762
OH-4-SN	0.4699	0.528	0.4767	0.4347	0.3078	0.4582	0.1108	0.149	0.7279	0.7272	0.4309	0.468	0.45	0.7663	0.6427	0.6049	0.6783	0.7336	0.7135	0.7319	0.7418	1	0.6936	0.4819	0.4789	0.7899	0.7052	0.7431	0.7227	0.6416	0.676	0.7097	0.7198	0.7458	0.6707	0.6856	0.6673	0.7058	0.6259	0.6359	0.6375	0.6825	0.6887	0.7642	0.6857	0.6756	0.7851	0.7348	0.7096
OH-1-SS	0.4693	0.4328	0.3863	0.4116	0.2813	0.4331	0.0964	0.1348	0.6218	0.7005	0.4371	0.4853	0.5155	0.6756	0.5621	0.5368	0.5546	0.614	0.6542	0.6018	0.5954	0.6936	1	0.4749	0.4677	0.6345	0.5977	0.6158	0.579	0.5684	0.6161	0.6533	0.5766	0.624	0.6432	0.6484	0.6585	0.6167	0.6073	0.6555	0.5736	0.6347	0.5911	0.6909	0.5934	0.519	0.6856	0.6652	0.5283
Watahomigi	0.8034	0.5797	0.5004	0.5941	0.3714	0.7364	0.3143	0.3053	0.5332	0.5124	0.7272	0.7706	0.4933	0.469	0.31	0.6381	0.5865	0.4047	0.5959	0.637	0.3961	0.4819	0.4749	1	0.7865	0.5398	0.6433	0.614	0.5973	0.6894	0.652	0.5085	0.5766	0.5813	0.5768	0.6151	0.5736	0.6319	0.6311	0.6386	0.598	0.6129	0.5291	0.5593	0.6853	0.4405	0.5235	0.6196	0.5159
Manakacha1	0.8322	0.633	0.5305	0.6012	0.404	0.7083	0.2853	0.2765	0.5633	0.4912	0.7644	0.8279	0.4433	0.4434	0.3988	0.763	0.5529	0.5214	0.5971	0.678	0.4291	0.4789	0.4677	0.7865	1	0.5212	0.6989	0.6649	0.6976	0.766	0.7006	0.5885	0.6697	0.6364	0.6614	0.6903	0.6449	0.6976	0.7442	0.6553	0.7263	0.7037	0.6406	0.5856	0.6959	0.3862	0.5466	0.6507	0.5875
BCRA-01-10	0.5111	0.5069	0.4695	0.4442	0.319	0.4891	0.137	0.1525	0.7568	0.7548	0.4765	0.5141	0.5037	0.7814	0.6093	0.6748	0.6745	0.7114	0.7719	0.7223	0.6666	0.7899	0.6345	0.5398	0.5212	1	0.6893	0.7491	0.7078	0.6762	0.719	0.6762	0.6935	0.7551	0.7092	0.7071	0.6951	0.7389	0.6663	0.6715	0.6889	0.7069	0.6944	0.7781	0.7301	0.666	0.7661	0.7433	0.7319
MB1-3	0.6457	0.6367	0.5486	0.5144	0.3711	0.6132	0.1923	0.206	0.6682	0.6386	0.589	0.6518	0.4743	0.7068	0.6365	0.7883	0.7634	0.729	0.7396	0.7964	0.6745	0.7052	0.5977	0.6433	0.6989	0.6893	1	0.8992	0.8645	0.7914	0.8394	0.7944	0.8392	0.8576	0.766	0.8241	0.759	0.7781	0.8032	0.7326	0.7701	0.8166	0.7002	0.7896	0.7882	0.522	0.7038	0.7946	0.7372
MB2-4	0.624	0.6437	0.5579	0.5188	0.3658	0.597	0.1806	0.1973	0.712	0.6616	0.5711	0.6456	0.4874	0.7281	0.6657	0.774	0.7633	0.767	0.7424	0.8232	0.71	0.7431	0.6158	0.614	0.6649	0.7491	0.8992	1	0.8866	0.7906	0.8422	0.8105	0.8398	0.8644	0.8088	0.8351	0.7858	0.8109	0.8147	0.7528	0.7744	0.8328	0.7378	0.8111	0.7781	0.5596	0.747	0.8348	0.7606
MB2-2	0.6256	0.6683	0.5722	0.5285	0.3704	0.5746	0.1851	0.1915	0.6651	0.6335	0.5787	0.6275	0.4469	0.6765	0.6461	0.7971	0.7421	0.771	0.7258	0.7855	0.672	0.7227	0.579	0.5973	0.6976	0.7078	0.8645	0.8866	1	0.8013	0.8382	0.7784	0.8595	0.8698	0.7681	0.7957	0.7411	0.8083	0.7799	0.6961	0.7638	0.791	0.7174	0.7746	0.7569	0.5344	0.6936	0.782	0.782
MB2-3	0.7297	0.6947	0.594	0.6093	0.4153	0.6581	0.23	0.2472	0.6996	0.6178	0.6866	0.7582	0.4903	0.5974	0.5492	0.828	0.6641	0.6673	0.7162	0.7705	0.6081	0.6416	0.5684	0.6894	0.766	0.6762	0.7914	0.7906	0.8013	1	0.8146	0.7685	0.8033	0.7682	0.8192	0.8053	0.7841	0.7713	0.8309	0.7125	0.7716	0.8618	0.6873	0.752	0.8009	0.4835	0.7151	0.8264	0.6853
MB2-5	0.6411	0.6183	0.5156	0.5159	0.3623	0.6168	0.1873	0.1922	0.6683	0.7398	0.5888	0.6513	0.501	0.7003	0.6245	0.8555	0.7042	0.7255	0.7892	0.7747	0.61	0.676	0.6161	0.652	0.7006	0.719	0.8394	0.8422	0.8382	0.8146	1	0.8053	0.7887	0.8422	0.8514	0.8611	0.8333	0.8327	0.832	0.8089	0.8466	0.8429	0.7557	0.7832	0.7832	0.5362	0.7041	0.8223	0.7266
MB2-1	0.5576	0.6158	0.5419	0.5221	0.3574	0.515	0.1391	0.1976	0.7173	0.7014	0.5158	0.5896	0.4806	0.764	0.7673	0.77	0.6841	0.8343	0.6922	0.7521	0.7357	0.7097	0.6533	0.5085	0.5885	0.6762	0.7944	0.8105	0.7784	0.7685	0.8053	1	0.7744	0.7847	0.8748	0.8377	0.8346	0.7451	0.8179	0.7468	0.7687	0.8516	0.7222	0.8143	0.6899	0.5143	0.7443	0.8118	0.6609
MB1-2	0.6263	0.6854	0.6094	0.5726	0.402	0.5839	0.1825	0.206	0.6769	0.6103	0.5748	0.6441	0.4217	0.6677	0.6849	0.7815	0.7734	0.7665	0.7151	0.7581	0.7201	0.7198	0.5766	0.5766	0.6697	0.6935	0.8392	0.8398	0.8595	0.8033	0.7887	0.7744	1	0.8369	0.768	0.7436	0.7357	0.7401	0.7776	0.6775	0.7483	0.7867	0.6874	0.7768	0.7389	0.4969	0.7254	0.783	0.7298
MB1-1	0.5863	0.5862	0.5126	0.4711	0.3355	0.5306	0.1331	0.1473	0.683	0.6938	0.5275	0.5974	0.4687	0.7416	0.6829	0.7592	0.7621	0.7857	0.7842	0.7793	0.695	0.7458	0.624	0.5813	0.6364	0.7551	0.8576	0.8644	0.8698	0.7682	0.8422	0.7847	0.8369	1	0.7707	0.8022	0.7411	0.8078	0.7535	0.7386	0.7619	0.8047	0.7114	0.8106	0.7438	0.5578	0.6981	0.7717	0.7699
16	0.6363	0.6285	0.5455	0.5596	0.382	0.5731	0.1764	0.2175	0.7438	0.7477	0.5935	0.6705	0.5342	0.7015	0.6701	0.8308	0.649	0.784	0.7477	0.7582	0.6484	0.6707	0.6432	0.5768	0.6614	0.7092	0.766	0.8088	0.7681	0.8192	0.8514	0.8748	0.768	0.7707	1	0.863	0.9351	0.8038	0.8708	0.8189	0.834	0.8952	0.7643	0.8038	0.757	0.5038	0.7712	0.8597	0.6705
23	0.6556	0.5982	0.5009	0.5204	0.363	0.5818	0.1805	0.2024	0.7295	0.7254	0.6106	0.6801	0.5188	0.7044	0.6356	0.8225	0.6691	0.735	0.7871	0.8117	0.6292	0.6856	0.6484	0.6151	0.6903	0.7071	0.8241	0.8351	0.7957	0.8053	0.8611	0.8377	0.7436	0.8022	0.863	1	0.8391	0.8429	0.8435	0.8019	0.8568	0.9009	0.7804	0.8134	0.7871	0.5396	0.7542	0.8467	0.7051
29	0.6276	0.6	0.5243	0.5447	0.3763	0.576	0.1697	0.2168	0.7241	0.7709	0.5864	0.6557	0.5689	0.7032	0.65	0.8109	0.6328	0.7599	0.7288	0.7287	0.6286	0.6673	0.6585	0.5736	0.6449	0.6951	0.759	0.7858	0.7411	0.7841	0.8333	0.8346	0.7357	0.7411	0.9351	0.8391	1	0.7779	0.8569	0.8206	0.8219	0.8755	0.7415	0.8024	0.7374	0.5172	0.7825	0.8372	0.6414
38	0.6594	0.6008	0.4917	0.5101	0.3484	0.5633	0.1803	0.1881	0.7423	0.7014	0.6112	0.6675	0.4889	0.6607	0.584	0.7895	0.6524	0.7286	0.7558	0.8048	0.6167	0.7058	0.6167	0.6319	0.6976	0.7389	0.7781	0.8109	0.8083	0.7713	0.8327	0.7451	0.7401	0.8078	0.8038	0.8429	0.7779	1	0.7798	0.7857	0.8455	0.8231	0.8195	0.7486	0.787	0.5794	0.7071	0.79	0.7382
48	0.7064	0.6418	0.562	0.5627	0.3961	0.6191	0.2008	0.2304	0.6918	0.6495	0.6626	0.7352	0.5144	0.6651	0.6159	0.8445	0.6519	0.7189	0.723	0.745	0.6036	0.6259	0.6073	0.6311	0.7442	0.6663	0.8032	0.8147	0.7799	0.8309	0.832	0.8179	0.7776	0.7535	0.8708	0.8435	0.8569	0.7798	1	0.7709	0.833	0.8938	0.7214	0.7787	0.7483	0.4746	0.7057	0.8201	0.645
49	0.6475	0.5242	0.4282	0.4703	0.3365	0.5825	0.1649	0.1798	0.693	0.7578	0.5975	0.6562	0.5781	0.659	0.5785	0.7611	0.5942	0.6934	0.7369	0.7037	0.5646	0.6359	0.6555	0.6386	0.6553	0.6715	0.7326	0.7528	0.6961	0.7125	0.8089	0.7468	0.6775	0.7386	0.8189	0.8019	0.8206	0.7857	0.7709	1	0.7988	0.7924	0.7551	0.7651	0.725	0.5186	0.7006	0.7776	0.6324
50	0.6741	0.5904	0.4889	0.5159	0.3788	0.5902	0.1822	0.2068	0.7326	0.6924	0.6442	0.665	0.4722	0.6161	0.5966	0.8536	0.591	0.7314	0.7126	0.7581	0.5717	0.6375	0.5736	0.598	0.7263	0.6889	0.7701	0.7744	0.7638	0.7716	0.8466	0.7687	0.7483	0.7619	0.834	0.8568	0.8219	0.8455	0.833	0.7988	1	0.8486	0.808	0.7314	0.7424	0.5094	0.6911	0.7922	0.7196
46-1	0.6778	0.6392	0.5527	0.5578	0.3871	0.5977	0.1859	0.2329	0.7537	0.6985	0.6402	0.7162	0.5138	0.6892	0.6367	0.8398	0.667	0.7504	0.7706	0.8016	0.6508	0.6825	0.6347	0.6129	0.7037	0.7069	0.8166	0.8328	0.791	0.8618	0.8429	0.8516	0.7867	0.8047	0.8952	0.9009	0.8755	0.8231	0.8938	0.7924	0.8486	1	0.7472	0.8392	0.7794	0.5228	0.7745	0.8853	0.6877
46-2	0.5897	0.5689	0.4553	0.4825	0.3563	0.53	0.1622	0.1681	0.737	0.661	0.5361	0.5933	0.4269	0.604	0.6015	0.7362	0.5494	0.7477	0.6638	0.7482	0.6558	0.6887	0.5911	0.5291	0.6406	0.6944	0.7002	0.7378	0.7174	0.6873	0.7557	0.7222	0.6874	0.7114	0.7643	0.7804	0.7415	0.8195	0.7214	0.7551	0.808	0.7472	1	0.6885	0.6915	0.5432	0.6752	0.7217	0.745
IB_AD	0.5808	0.5685	0.4976	0.4868	0.3512	0.5284	0.1433	0.1765	0.7383	0.7893	0.5368	0.5915	0.5946	0.7966	0.6508	0.734	0.7149	0.7488	0.8071	0.7665	0.684	0.7642	0.6909	0.5593	0.5856	0.7781	0.7896	0.8111	0.7746	0.752	0.7832	0.8143	0.7768	0.8106	0.8038	0.8134	0.8024	0.7486	0.7787	0.7651	0.7314	0.8392	0.6885	1	0.7548	0.601	0.8095	0.8611	0.6988
IB_M1	0.6829	0.6113	0.5072	0.557	0.3783	0.6116	0.2051	0.2055	0.726	0.6837	0.6384	0.6908	0.5236	0.6827	0.5114	0.7527	0.6596	0.6096	0.7996	0.8175	0.5819	0.6857	0.5934	0.6853	0.6959	0.7301	0.7882	0.7781	0.7569	0.8009	0.7832	0.6899	0.7389	0.7438	0.757	0.7871	0.7374	0.787	0.7483	0.725	0.7424	0.7794	0.6915	0.7548	1	0.5983	0.7692	0.8155	0.6914
IB_M2	0.397	0.3944	0.34	0.3418	0.2527	0.3605	0.083	0.0963	0.6013	0.6193	0.3706	0.3805	0.4635	0.622	0.4417	0.4705	0.5246	0.5149	0.5985	0.5823	0.5477	0.6756	0.519	0.4405	0.3862	0.666	0.522	0.5596	0.5344	0.4835	0.5362	0.5143	0.4969	0.5578	0.5038	0.5396	0.5172	0.5794	0.4746	0.5186	0.5094	0.5228	0.5432	0.601	0.5983	1	0.624	0.5712	0.5869
FCB_AD	0.5611	0.6171	0.5363	0.5666	0.3725	0.5254	0.1652	0.2288	0.8083	0.7646	0.5348	0.5899	0.5285	0.7498	0.6175	0.6592	0.6418	0.7189	0.7656	0.778	0.7062	0.7851	0.6856	0.5235	0.5466	0.7661	0.7038	0.747	0.6936	0.7151	0.7041	0.7443	0.7254	0.6981	0.7712	0.7542	0.7825	0.7071	0.7057	0.7006	0.6911	0.7745	0.6752	0.8095	0.7692	0.624	1	0.8272	0.6455
FCB_A2	0.6498	0.6392	0.5453	0.5603	0.3935	0.5905	0.188	0.228	0.7698	0.753	0.6159	0.6695	0.5545	0.7333	0.6161	0.7682	0.6735	0.713	0.7917	0.8014	0.674	0.7348	0.6652	0.6196	0.6507	0.7433	0.7946	0.8348	0.782	0.8264	0.8223	0.8118	0.783	0.7717	0.8597	0.8467	0.8372	0.79	0.8201	0.7776	0.7922	0.8853	0.7217	0.8611	0.8155	0.5712	0.8272	1	0.6911
FCB_A1	0.5235	0.5508	0.4922	0.4542	0.3416	0.4952	0.14	0.1427	0.669	0.6	0.4809	0.5048	0.4004	0.6033	0.5677	0.6838	0.6436	0.6943	0.6574	0.7435	0.6762	0.7096	0.5283	0.5159	0.5875	0.7319	0.7372	0.7606	0.782	0.6853	0.7266	0.6609	0.7298	0.7699	0.6705	0.7051	0.6414	0.7382	0.645	0.6324	0.7196	0.6877	0.745	0.6988	0.6914	0.5869	0.6455	0.6911	1
S3	0.59	0.5472	0.4535	0.4789	0.3386	0.5577	0.1753	0.2067	0.7389	0.7843	0.5563	0.5782	0.6086	0.7049	0.5649	0.7277	0.6376	0.6789	0.7453	0.7615	0.6025	0.7191	0.6638	0.6011	0.5949	0.7504	0.7365	0.7623	0.7437	0.7076	0.7949	0.7186	0.6819	0.7559	0.7624	0.7919	0.7854	0.8213	0.7225	0.7497	0.7847	0.7752	0.7307	0.786	0.761	0.6495	0.741	0.7774	0.6959
O_M source	0.4139	0.5989	0.5163	0.4704	0.351	0.3946	0.1056	0.1577	0.6656	0.4955	0.3797	0.4232	0.2914	0.5582	0.6352	0.5779	0.536	0.6976	0.5219	0.6331	0.7405	0.653	0.4701	0.3705	0.452	0.623	0.623	0.651	0.6583	0.5901	0.5743	0.6317	0.6538	0.6476	0.5826	0.5944	0.5463	0.5918	0.5459	0.5086	0.5931	0.6017	0.6558	0.6055	0.5547	0.5221	0.6257	0.6105	0.7449
Central_App_Crys	0.4556	0.5731	0.5177	0.4864	0.345	0.4253	0.0942	0.1579	0.7371	0.6522	0.4213	0.4834	0.4067	0.755	0.7952	0.6322	0.6652	0.8292	0.6244	0.6967	0.8351	0.7872	0.6525	0.3971	0.4691	0.7126	0.7106	0.7471	0.7173	0.64	0.676	0.8098	0.7672	0.757	0.7267	0.6998	0.7113	0.6825	0.682	0.6427	0.6633	0.7199	0.7252	0.744	0.601	0.5338	0.7308	0.7225	0.6845
N_Appalachian	0.5095	0.427	0.358	0.3888	0.2822	0.4769	0.1324	0.1457	0.6212	0.734	0.4796	0.5007	0.5431	0.6621	0.4996	0.6054	0.5518	0.5706	0.7081	0.6386	0.503	0.6853	0.6485	0.5251	0.5167	0.6616	0.6031	0.6244	0.6002	0.5894	0.6781	0.6157	0.5754	0.6443	0.6644	0.6804	0.6734	0.6722	0.6147	0.705	0.6449	0.6559	0.6039	0.7066	0.6593	0.605	0.671	0.6785	0.571
NW_Arctic	0.6056	0.4204	0.3461	0.4023	0.271	0.5026	0.2024	0.1748	0.4845	0.4857	0.6104	0.6019	0.5547	0.4472	0.2549	0.5106	0.4833	0.3351	0.5667	0.5038	0.3145	0.4353	0.4356	0.6321	0.5461	0.5253	0.5086	0.5134	0.5105	0.5944	0.5286	0.4203	0.4911	0.5051	0.4963	0.5132	0.4957	0.5132	0.5118	0.5512	0.4926	0.5136	0.4119	0.5199	0.6188	0.408	0.4912	0.5463	0.4435
NE_Arctic	0.6935	0.4848	0.4193	0.4869	0.3288	0.6012	0.2398	0.2376	0.5635	0.5649	0.6749	0.6918	0.6105	0.5004	0.3314	0.6091	0.535	0.4228	0.6111	0.6183	0.3979	0.5084	0.5201	0.7008	0.6354	0.5786	0.6139	0.6181	0.5833	0.6756	0.6216	0.5247	0.5651	0.5616	0.5998	0.6192	0.6124	0.6201	0.6353	0.6477	0.5967	0.6243	0.5329	0.6102	0.7014	0.4865	0.5793	0.6584	0.5059
Sonora	0.6454	0.5828	0.5295	0.5633	0.377	0.6008	0.3472	0.3507	0.3922	0.2984	0.6217	0.6397	0.3436	0.2657	0.2562	0.5688	0.3999	0.3424	0.4175	0.465	0.2945	0.3091	0.2916	0.6745	0.664	0.3809	0.5097	0.474	0.4835	0.576	0.4864	0.3815	0.4897	0.433	0.4566	0.4509	0.4361	0.4571	0.5022	0.4647	0.5013	0.4736	0.4077	0.3754	0.5287	0.2567	0.3784	0.4559	0.4785
[truncated: 7 more columns]

## Sheet: 2-Desmoinesian-Virgilian
pdp_x	AZShelf2	MS04	MS05	MS06	MC05	GS01	GS09	MC17	GS11	MC20	GS24	V18	V20	EC01	RC01	RC19	V10	V01	V22	V25	DMR01	LC01	SP01	CF02	HT02	HT14	HT04	HT20	HT24	KA03	MP-DZ2	DryCreek	Pedreg	5PS-42	5PS-58	5PS-82	1WM-302	1PL-534	KC-2	Z1	Z4	OK-1-VN	OK-2-V2	01PL12	04TD10	14TD10	ECS-13-2	ECS-13-4	ECS-13-5
AZShelf2	1	0.1263	0.123	0.1655	0.2456	0.3167	0.7347	0.7644	0.1503	0.6089	0.0918	0.1818	0.2003	0.2955	0.1528	0.5378	0.5426	0.0978	0.1025	0.0824	0.1034	0.0916	0.1191	0.1122	0.1484	0.4003	0.7136	0.7177	0.5862	0.2486	0.4298	0.2611	0.4735	0.9411	0.9153	0.9143	0.6636	0.687	0.4329	0.335	0.3637	0.0895	0.1234	0.3229	0.6578	0.628	0.6835	0.7054	0.627
MS04	0.1263	1	0.93	0.9003	0.00079148	0.0105	0.046	0.0888	7.1889e-05	0.0162	0.00058819	0.00015085	0.00051522	0.015	0.0003926	0.027	0.00092014	0.00040675	7.5282e-07	1.5087e-05	0.0004784	0.0013	0.00078892	0.0013	0.0006683	0.0452	0.0608	0.0255	0.0357	0.0096	0.0233	0.0083	0.08	0.1033	0.0582	0.2176	0.0194	0.0358	0.3942	0.1571	0.3444	0.0384	0.083	0.0151	0.1099	0.0965	0.1428	0.037	0.026
MS05	0.123	0.93	1	0.8137	0.0027	0.0116	0.0451	0.0952	0.0002425	0.0212	1.9994e-05	1.9005e-07	0.00099769	0.0135	0.00051719	0.0276	0.00062317	0.00081878	7.0944e-05	0.00021668	5.1304e-05	2.9927e-06	2.5916e-05	8.2015e-05	0.0028	0.0358	0.0777	0.023	0.043	0.0142	0.0328	0.0072	0.0806	0.0947	0.0548	0.2326	0.0219	0.033	0.4559	0.1604	0.2697	0.0408	0.0953	0.0167	0.125	0.1039	0.129	0.0465	0.0282
MS06	0.1655	0.9003	0.8137	1	0.0333	0.0663	0.1058	0.1101	0.03	0.0783	0.0317	3.8058e-05	0.00047959	0.0368	0.00074838	0.0502	3.6106e-05	0.0011	9.4006e-05	0.00019852	0.0581	0.0437	0.0451	0.0456	0.00026037	0.0726	0.0601	0.0483	0.0821	0.0611	0.1079	0.0086	0.1206	0.1549	0.0875	0.2332	0.0296	0.0375	0.3375	0.2298	0.4136	0.0472	0.1068	0.0227	0.1189	0.0898	0.1893	0.0427	0.037
MC05	0.2456	0.00079148	0.0027	0.0333	1	0.8131	0.4054	0.1335	0.8395	0.4104	0.7692	0.4949	0.5179	0.7871	0.4481	0.4285	0.3475	0.4767	0.4926	0.4263	0.6027	0.6936	0.7535	0.5528	0.0263	0.048	0.1516	0.1557	0.2615	0.7954	0.7044	0.0669	0.1476	0.2678	0.2558	0.1426	0.1363	0.2731	0.0342	0.2411	0.0306	0.0123	0.0232	0.0587	0.1334	0.2044	0.0908	0.1584	0.2776
GS01	0.3167	0.0105	0.0116	0.0663	0.8131	1	0.45	0.141	0.8722	0.5044	0.793	0.4753	0.3391	0.7279	0.2789	0.4263	0.3866	0.5193	0.4041	0.5012	0.5355	0.5248	0.6396	0.5008	0.0259	0.1444	0.1989	0.2355	0.4045	0.6975	0.7055	0.0561	0.2296	0.3077	0.3167	0.231	0.1828	0.3747	0.0412	0.2643	0.0735	0.0275	0.0384	0.0744	0.1416	0.2054	0.1325	0.2959	0.4039
GS09	0.7347	0.046	0.0451	0.1058	0.4054	0.45	1	0.6035	0.2858	0.6323	0.2038	0.2236	0.3051	0.4016	0.2892	0.5917	0.5466	0.1448	0.2124	0.1084	0.2571	0.254	0.3031	0.2675	0.0772	0.3743	0.6184	0.5404	0.5185	0.3719	0.521	0.1657	0.3843	0.7235	0.6529	0.629	0.5114	0.5651	0.183	0.2864	0.2487	0.0278	0.0423	0.1773	0.4284	0.4208	0.4675	0.5399	0.4868
MC17	0.7644	0.0888	0.0952	0.1101	0.1335	0.141	0.6035	1	0.0404	0.3668	0.0245	0.0988	0.1471	0.1508	0.0894	0.3423	0.4148	0.0325	0.0479	0.0235	0.039	0.0495	0.0536	0.0346	0.0659	0.3206	0.59	0.5486	0.3203	0.1255	0.2966	0.12	0.2996	0.7125	0.6911	0.7051	0.5292	0.5336	0.3582	0.2308	0.3221	0.0422	0.0754	0.2301	0.5172	0.4975	0.5015	0.5626	0.5389
GS11	0.1503	7.1889e-05	0.0002425	0.03	0.8395	0.8722	0.2858	0.0404	1	0.4311	0.9231	0.425	0.3532	0.7167	0.2857	0.315	0.2597	0.4969	0.4321	0.4781	0.669	0.6668	0.7812	0.6102	0.0153	0.0485	0.0849	0.1153	0.2697	0.787	0.6767	0.0397	0.1246	0.1745	0.1518	0.0798	0.0778	0.1622	0.0111	0.1952	0.0179	0.0052	0.0129	0.0329	0.0695	0.0995	0.0443	0.0991	0.1811
MC20	0.6089	0.0162	0.0212	0.0783	0.4104	0.5044	0.6323	0.3668	0.4311	1	0.2974	0.1364	0.1841	0.3566	0.166	0.5175	0.414	0.0862	0.1166	0.0687	0.4921	0.366	0.4614	0.5256	0.0923	0.1919	0.4328	0.4699	0.5793	0.4223	0.5952	0.1517	0.3344	0.635	0.579	0.4966	0.4423	0.3839	0.1573	0.2856	0.1329	0.0299	0.0612	0.1752	0.4237	0.2941	0.3362	0.3581	0.3197
GS24	0.0918	0.00058819	1.9994e-05	0.0317	0.7692	0.793	0.2038	0.0245	0.9231	0.2974	1	0.3441	0.2298	0.588	0.1495	0.2189	0.208	0.4433	0.3087	0.4536	0.6476	0.7132	0.7651	0.5314	0.0068	0.0529	0.0372	0.0708	0.2063	0.7452	0.6474	0.0222	0.1236	0.114	0.0939	0.0398	0.0547	0.1225	0.0024	0.1796	0.0177	0.0055	0.0147	0.023	0.0346	0.0557	0.0263	0.0751	0.1563
V18	0.1818	0.00015085	1.9005e-07	3.8058e-05	0.4949	0.4753	0.2236	0.0988	0.425	0.1364	0.3441	1	0.6966	0.7608	0.5283	0.3754	0.4569	0.8613	0.6597	0.8331	0.0569	0.1068	0.1514	0.051	0.0273	0.0607	0.1778	0.091	0.132	0.3898	0.3031	0.0713	0.0785	0.1735	0.1988	0.1002	0.1451	0.3786	0.0325	0.0986	0.0105	0.00037992	0.0005094	0.0523	0.088	0.2362	0.0565	0.1736	0.2877
V20	0.2003	0.00051522	0.00099769	0.00047959	0.5179	0.3391	0.3051	0.1471	0.3532	0.1841	0.2298	0.6966	1	0.7133	0.8326	0.3925	0.3724	0.5706	0.7865	0.4703	0.1082	0.1666	0.2201	0.1121	0.0235	0.0243	0.2163	0.1112	0.0702	0.4564	0.2681	0.1065	0.0421	0.2429	0.1855	0.1004	0.1098	0.2064	0.0481	0.0688	0.004	0.0006778	1.2835e-05	0.0797	0.115	0.2355	0.0412	0.1038	0.1743
EC01	0.2955	0.015	0.0135	0.0368	0.7871	0.7279	0.4016	0.1508	0.7167	0.3566	0.588	0.7608	0.7133	1	0.6394	0.4795	0.406	0.7554	0.7691	0.6917	0.2867	0.3693	0.4625	0.261	0.0284	0.0668	0.222	0.2167	0.2797	0.7828	0.5824	0.0875	0.1537	0.3029	0.3015	0.178	0.1694	0.3521	0.0741	0.2257	0.056	0.0103	0.0164	0.0634	0.1763	0.2667	0.1087	0.1817	0.2992
RC01	0.1528	0.0003926	0.00051719	0.00074838	0.4481	0.2789	0.2892	0.0894	0.2857	0.166	0.1495	0.5283	0.8326	0.6394	1	0.3374	0.2099	0.4546	0.8184	0.3245	0.0854	0.1462	0.2	0.1044	0.0329	0.0055	0.169	0.0857	0.0562	0.4267	0.2077	0.0889	0.0214	0.1849	0.1384	0.081	0.0652	0.167	0.0287	0.0551	0.0028	0.00022891	0.0018	0.0276	0.0918	0.2032	0.0331	0.0517	0.0955
RC19	0.5378	0.027	0.0276	0.0502	0.4285	0.4263	0.5917	0.3423	0.315	0.5175	0.2189	0.3754	0.3925	0.4795	0.3374	1	0.4751	0.2554	0.2565	0.2192	0.2126	0.2085	0.2486	0.2476	0.11	0.1846	0.4211	0.364	0.4703	0.3516	0.4785	0.161	0.229	0.5442	0.4951	0.4339	0.5107	0.5253	0.1874	0.2697	0.1658	0.0227	0.0248	0.2385	0.3194	0.3983	0.3357	0.3679	0.3792
V10	0.5426	0.00092014	0.00062317	3.6106e-05	0.3475	0.3866	0.5466	0.4148	0.2597	0.414	0.208	0.4569	0.3724	0.406	0.2099	0.4751	1	0.3238	0.2272	0.3176	0.1036	0.1111	0.141	0.1035	0.1005	0.33	0.4165	0.3406	0.319	0.251	0.3486	0.21	0.3309	0.5099	0.5566	0.4186	0.5589	0.6088	0.0717	0.1313	0.0432	0.0217	0.0228	0.1447	0.324	0.3839	0.2674	0.4863	0.5361
V01	0.0978	0.00040675	0.00081878	0.0011	0.4767	0.5193	0.1448	0.0325	0.4969	0.0862	0.4433	0.8613	0.5706	0.7554	0.4546	0.2554	0.3238	1	0.7572	0.973	0.047	0.0993	0.1502	0.0333	0.0151	0.0462	0.1039	0.0777	0.1092	0.4481	0.2672	0.0444	0.058	0.0895	0.112	0.0478	0.0752	0.2808	0.0092	0.0817	0.0069	4.269e-05	0.00088062	0.0251	0.0325	0.1367	0.0185	0.1285	0.2238
V22	0.1025	7.5282e-07	7.0944e-05	9.4006e-05	0.4926	0.4041	0.2124	0.0479	0.4321	0.1166	0.3087	0.6597	0.7865	0.7691	0.8184	0.2565	0.2272	0.7572	1	0.6352	0.0718	0.1372	0.2007	0.0658	0.0145	0.0122	0.1274	0.0876	0.0585	0.5335	0.2381	0.0563	0.0267	0.1173	0.0961	0.0481	0.0413	0.1631	0.0168	0.0695	0.0049	0.00016974	0.00098977	0.0141	0.0518	0.1325	0.0103	0.0577	0.114
V25	0.0824	1.5087e-05	0.00021668	0.00019852	0.4263	0.5012	0.1084	0.0235	0.4781	0.0687	0.4536	0.8331	0.4703	0.6917	0.3245	0.2192	0.3176	0.973	0.6352	1	0.0384	0.0832	0.1266	0.0238	0.0077	0.0513	0.0837	0.0662	0.1099	0.3937	0.2536	0.0328	0.0612	0.0711	0.0969	0.0396	0.071	0.2645	0.0085	0.0808	0.0087	0.0006177	4.489e-05	0.0247	0.024	0.109	0.0157	0.126	0.218
DMR01	0.1034	0.0004784	5.1304e-05	0.0581	0.6027	0.5355	0.2571	0.039	0.669	0.4921	0.6476	0.0569	0.1082	0.2867	0.0854	0.2126	0.1036	0.047	0.0718	0.0384	1	0.8951	0.9328	0.9567	0.0041	0.0184	0.0309	0.0615	0.1991	0.5438	0.5931	0.016	0.0896	0.1456	0.0978	0.0522	0.0468	0.0331	0.0024	0.1766	0.0157	0.0066	0.0253	0.0204	0.0562	0.0338	0.0428	0.0283	0.0604
LC01	0.0916	0.0013	2.9927e-06	0.0437	0.6936	0.5248	0.254	0.0495	0.6668	0.366	0.7132	0.1068	0.1666	0.3693	0.1462	0.2085	0.1111	0.0993	0.1372	0.0832	0.8951	1	0.956	0.7947	0.0062	0.0147	0.0291	0.0525	0.161	0.6863	0.6334	0.0187	0.1033	0.1362	0.0858	0.038	0.0497	0.0473	0.0028	0.191	0.0154	0.0052	0.0232	0.0148	0.0556	0.045	0.0301	0.0272	0.0687
SP01	0.1191	0.00078892	2.5916e-05	0.0451	0.7535	0.6396	0.3031	0.0536	0.7812	0.4614	0.7651	0.1514	0.2201	0.4625	0.2	0.2486	0.141	0.1502	0.2007	0.1266	0.9328	0.956	1	0.849	0.0077	0.0211	0.0466	0.0771	0.2076	0.7441	0.6832	0.0232	0.1068	0.16	0.1157	0.0561	0.0519	0.0657	0.0051	0.1887	0.015	0.0061	0.0233	0.0228	0.0685	0.0594	0.0371	0.0434	0.0924
CF02	0.1122	0.0013	8.2015e-05	0.0456	0.5528	0.5008	0.2675	0.0346	0.6102	0.5256	0.5314	0.051	0.1121	0.261	0.1044	0.2476	0.1035	0.0333	0.0658	0.0238	0.9567	0.7947	0.849	1	0.0055	0.0126	0.04	0.0619	0.2109	0.4563	0.5288	0.0187	0.0709	0.152	0.1076	0.0622	0.0516	0.0322	0.0016	0.177	0.0123	0.0049	0.0174	0.019	0.0546	0.0374	0.0498	0.0268	0.0495
HT02	0.1484	0.0006683	0.0028	0.00026037	0.0263	0.0259	0.0772	0.0659	0.0153	0.0923	0.0068	0.0273	0.0235	0.0284	0.0329	0.11	0.1005	0.0151	0.0145	0.0077	0.0041	0.0062	0.0077	0.0055	1	0.0819	0.1335	0.1201	0.165	0.0474	0.0647	0.2675	0.139	0.1345	0.1665	0.1251	0.2058	0.1793	0.2001	0.0879	0.0138	0.0012	5.2481e-05	0.1912	0.2579	0.2256	0.1581	0.1764	0.1049
HT14	0.4003	0.0452	0.0358	0.0726	0.048	0.1444	0.3743	0.3206	0.0485	0.1919	0.0529	0.0607	0.0243	0.0668	0.0055	0.1846	0.33	0.0462	0.0122	0.0513	0.0184	0.0147	0.0211	0.0126	0.0819	1	0.2989	0.254	0.2445	0.049	0.1589	0.0708	0.3606	0.3757	0.2824	0.4075	0.402	0.3443	0.1601	0.1558	0.3067	0.0166	0.0171	0.1958	0.1613	0.2836	0.2611	0.4143	0.3577
HT04	0.7136	0.0608	0.0777	0.0601	0.1516	0.1989	0.6184	0.59	0.0849	0.4328	0.0372	0.1778	0.2163	0.222	0.169	0.4211	0.4165	0.1039	0.1274	0.0837	0.0309	0.0291	0.0466	0.04	0.1335	0.2989	1	0.539	0.4942	0.1459	0.3011	0.2208	0.388	0.6733	0.6261	0.6624	0.5681	0.5875	0.41	0.2963	0.2321	0.0375	0.048	0.3191	0.5028	0.5147	0.5166	0.633	0.4762
HT20	0.7177	0.0255	0.023	0.0483	0.1557	0.2355	0.5404	0.5486	0.1153	0.4699	0.0708	0.091	0.1112	0.2167	0.0857	0.364	0.3406	0.0777	0.0876	0.0662	0.0615	0.0525	0.0771	0.0619	0.1201	0.254	0.539	1	0.5877	0.2082	0.2666	0.1714	0.3646	0.6687	0.7405	0.5957	0.5244	0.5111	0.2532	0.2198	0.2222	0.1018	0.1395	0.2545	0.5297	0.3778	0.4657	0.6017	0.4942
HT24	0.5862	0.0357	0.043	0.0821	0.2615	0.4045	0.5185	0.3203	0.2697	0.5793	0.2063	0.132	0.0702	0.2797	0.0562	0.4703	0.319	0.1092	0.0585	0.1099	0.1991	0.161	0.2076	0.2109	0.165	0.2445	0.4942	0.5877	1	0.2869	0.4274	0.1358	0.3739	0.5285	0.5938	0.4948	0.5401	0.5154	0.2251	0.3046	0.2055	0.0405	0.0523	0.25	0.4706	0.3018	0.4683	0.5647	0.4468
KA03	0.2486	0.0096	0.0142	0.0611	0.7954	0.6975	0.3719	0.1255	0.787	0.4223	0.7452	0.3898	0.4564	0.7828	0.4267	0.3516	0.251	0.4481	0.5335	0.3937	0.5438	0.6863	0.7441	0.4563	0.0474	0.049	0.1459	0.2082	0.2869	1	0.7001	0.1037	0.1908	0.2869	0.2407	0.146	0.1286	0.1988	0.0711	0.25	0.0489	0.0161	0.0368	0.0658	0.1859	0.1843	0.0932	0.1303	0.2043
MP-DZ2	0.4298	0.0233	0.0328	0.1079	0.7044	0.7055	0.521	0.2966	0.6767	0.5952	0.6474	0.3031	0.2681	0.5824	0.2077	0.4785	0.3486	0.2672	0.2381	0.2536	0.5931	0.6334	0.6832	0.5288	0.0647	0.1589	0.3011	0.2666	0.4274	0.7001	1	0.1195	0.2974	0.4472	0.3929	0.3235	0.2679	0.3744	0.1972	0.4328	0.1935	0.0435	0.078	0.1383	0.2666	0.3075	0.2743	0.2855	0.3538
DryCreek	0.2611	0.0083	0.0072	0.0086	0.0669	0.0561	0.1657	0.12	0.0397	0.1517	0.0222	0.0713	0.1065	0.0875	0.0889	0.161	0.21	0.0444	0.0563	0.0328	0.016	0.0187	0.0232	0.0187	0.2675	0.0708	0.2208	0.1714	0.1358	0.1037	0.1195	1	0.3316	0.29	0.257	0.2097	0.2067	0.2327	0.2115	0.0833	0.021	0.0411	0.0253	0.3033	0.3577	0.2855	0.2783	0.1963	0.1299
Pedreg	0.4735	0.08	0.0806	0.1206	0.1476	0.2296	0.3843	0.2996	0.1246	0.3344	0.1236	0.0785	0.0421	0.1537	0.0214	0.229	0.3309	0.058	0.0267	0.0612	0.0896	0.1033	0.1068	0.0709	0.139	0.3606	0.388	0.3646	0.3739	0.1908	0.2974	0.3316	1	0.4574	0.4314	0.4432	0.4064	0.4367	0.2422	0.2425	0.1607	0.1048	0.1251	0.2465	0.4352	0.3561	0.3401	0.4629	0.3513
5PS-42	0.9411	0.1033	0.0947	0.1549	0.2678	0.3077	0.7235	0.7125	0.1745	0.635	0.114	0.1735	0.2429	0.3029	0.1849	0.5442	0.5099	0.0895	0.1173	0.0711	0.1456	0.1362	0.16	0.152	0.1345	0.3757	0.6733	0.6687	0.5285	0.2869	0.4472	0.29	0.4574	1	0.8027	0.8144	0.6162	0.5874	0.4087	0.3122	0.3401	0.0713	0.0981	0.3168	0.6339	0.6039	0.6364	0.6105	0.5344
5PS-58	0.9153	0.0582	0.0548	0.0875	0.2558	0.3167	0.6529	0.6911	0.1518	0.579	0.0939	0.1988	0.1855	0.3015	0.1384	0.4951	0.5566	0.112	0.0961	0.0969	0.0978	0.0858	0.1157	0.1076	0.1665	0.2824	0.6261	0.7405	0.5938	0.2407	0.3929	0.257	0.4314	0.8027	1	0.7559	0.6611	0.7231	0.3011	0.2601	0.2228	0.0867	0.1157	0.3127	0.6437	0.572	0.6262	0.687	0.6522
5PS-82	0.9143	0.2176	0.2326	0.2332	0.1426	0.231	0.629	0.7051	0.0798	0.4966	0.0398	0.1002	0.1004	0.178	0.081	0.4339	0.4186	0.0478	0.0481	0.0396	0.0522	0.038	0.0561	0.0622	0.1251	0.4075	0.6624	0.5957	0.4948	0.146	0.3235	0.2097	0.4432	0.8144	0.7559	1	0.5651	0.5863	0.5045	0.3309	0.4124	0.103	0.144	0.2553	0.5704	0.5618	0.6204	0.6674	0.5328
1WM-302	0.6636	0.0194	0.0219	0.0296	0.1363	0.1828	0.5114	0.5292	0.0778	0.4423	0.0547	0.1451	0.1098	0.1694	0.0652	0.5107	0.5589	0.0752	0.0413	0.071	0.0468	0.0497	0.0519	0.0516	0.2058	0.402	0.5681	0.5244	0.5401	0.1286	0.2679	0.2067	0.4064	0.6162	0.6611	0.5651	1	0.6194	0.2267	0.2092	0.1823	0.0429	0.0479	0.2835	0.4842	0.4021	0.4813	0.5824	0.4807
1PL-534	0.687	0.0358	0.033	0.0375	0.2731	0.3747	0.5651	0.5336	0.1622	0.3839	0.1225	0.3786	0.2064	0.3521	0.167	0.5253	0.6088	0.2808	0.1631	0.2645	0.0331	0.0473	0.0657	0.0322	0.1793	0.3443	0.5875	0.5111	0.5154	0.1988	0.3744	0.2327	0.4367	0.5874	0.7231	0.5863	0.6194	1	0.2476	0.2753	0.1984	0.0386	0.0381	0.2701	0.4904	0.5744	0.4771	0.7325	0.7575
KC-2	0.4329	0.3942	0.4559	0.3375	0.0342	0.0412	0.183	0.3582	0.0111	0.1573	0.0024	0.0325	0.0481	0.0741	0.0287	0.1874	0.0717	0.0092	0.0168	0.0085	0.0024	0.0028	0.0051	0.0016	0.2001	0.1601	0.41	0.2532	0.2251	0.0711	0.1972	0.2115	0.2422	0.4087	0.3011	0.5045	0.2267	0.2476	1	0.3015	0.3696	0.0989	0.1405	0.3275	0.4429	0.4411	0.3856	0.304	0.2057
Z1	0.335	0.1571	0.1604	0.2298	0.2411	0.2643	0.2864	0.2308	0.1952	0.2856	0.1796	0.0986	0.0688	0.2257	0.0551	0.2697	0.1313	0.0817	0.0695	0.0808	0.1766	0.191	0.1887	0.177	0.0879	0.1558	0.2963	0.2198	0.3046	0.25	0.4328	0.0833	0.2425	0.3122	0.2601	0.3309	0.2092	0.2753	0.3015	1	0.4396	0.0441	0.0869	0.1079	0.2356	0.2512	0.3482	0.204	0.2269
Z4	0.3637	0.3444	0.2697	0.4136	0.0306	0.0735	0.2487	0.3221	0.0179	0.1329	0.0177	0.0105	0.004	0.056	0.0028	0.1658	0.0432	0.0069	0.0049	0.0087	0.0157	0.0154	0.015	0.0123	0.0138	0.3067	0.2321	0.2222	0.2055	0.0489	0.1935	0.021	0.1607	0.3401	0.2228	0.4124	0.1823	0.1984	0.3696	0.4396	1	0.0578	0.1003	0.0926	0.1648	0.1771	0.435	0.1836	0.177
OK-1-VN	0.0895	0.0384	0.0408	0.0472	0.0123	0.0275	0.0278	0.0422	0.0052	0.0299	0.0055	0.00037992	0.0006778	0.0103	0.00022891	0.0227	0.0217	4.269e-05	0.00016974	0.0006177	0.0066	0.0052	0.0061	0.0049	0.0012	0.0166	0.0375	0.1018	0.0405	0.0161	0.0435	0.0411	0.1048	0.0713	0.0867	0.103	0.0429	0.0386	0.0989	0.0441	0.0578	1	0.8789	0.0126	0.0704	0.0589	0.1112	0.0905	0.0648
OK-2-V2	0.1234	0.083	0.0953	0.1068	0.0232	0.0384	0.0423	0.0754	0.0129	0.0612	0.0147	0.0005094	1.2835e-05	0.0164	0.0018	0.0248	0.0228	0.00088062	0.00098977	4.489e-05	0.0253	0.0232	0.0233	0.0174	5.2481e-05	0.0171	0.048	0.1395	0.0523	0.0368	0.078	0.0253	0.1251	0.0981	0.1157	0.144	0.0479	0.0381	0.1405	0.0869	0.1003	0.8789	1	0.0088	0.0875	0.063	0.1344	0.0813	0.0662
01PL12	0.3229	0.0151	0.0167	0.0227	0.0587	0.0744	0.1773	0.2301	0.0329	0.1752	0.023	0.0523	0.0797	0.0634	0.0276	0.2385	0.1447	0.0251	0.0141	0.0247	0.0204	0.0148	0.0228	0.019	0.1912	0.1958	0.3191	0.2545	0.25	0.0658	0.1383	0.3033	0.2465	0.3168	0.3127	0.2553	0.2835	0.2701	0.3275	0.1079	0.0926	0.0126	0.0088	1	0.3153	0.2488	0.2629	0.3737	0.2523
04TD10	0.6578	0.1099	0.125	0.1189	0.1334	0.1416	0.4284	0.5172	0.0695	0.4237	0.0346	0.088	0.115	0.1763	0.0918	0.3194	0.324	0.0325	0.0518	0.024	0.0562	0.0556	0.0685	0.0546	0.2579	0.1613	0.5028	0.5297	0.4706	0.1859	0.2666	0.3577	0.4352	0.6339	0.6437	0.5704	0.4842	0.4904	0.4429	0.2356	0.1648	0.0704	0.0875	0.3153	1	0.4776	0.4992	0.5167	0.4325
14TD10	0.628	0.0965	0.1039	0.0898	0.2044	0.2054	0.4208	0.4975	0.0995	0.2941	0.0557	0.2362	0.2355	0.2667	0.2032	0.3983	0.3839	0.1367	0.1325	0.109	0.0338	0.045	0.0594	0.0374	0.2256	0.2836	0.5147	0.3778	0.3018	0.1843	0.3075	0.2855	0.3561	0.6039	0.572	0.5618	0.4021	0.5744	0.4411	0.2512	0.1771	0.0589	0.063	0.2488	0.4776	1	0.4506	0.48	0.5127
ECS-13-2	0.6835	0.1428	0.129	0.1893	0.0908	0.1325	0.4675	0.5015	0.0443	0.3362	0.0263	0.0565	0.0412	0.1087	0.0331	0.3357	0.2674	0.0185	0.0103	0.0157	0.0428	0.0301	0.0371	0.0498	0.1581	0.2611	0.5166	0.4657	0.4683	0.0932	0.2743	0.2783	0.3401	0.6364	0.6262	0.6204	0.4813	0.4771	0.3856	0.3482	0.435	0.1112	0.1344	0.2629	0.4992	0.4506	1	0.4516	0.3982
ECS-13-4	0.7054	0.037	0.0465	0.0427	0.1584	0.2959	0.5399	0.5626	0.0991	0.3581	0.0751	0.1736	0.1038	0.1817	0.0517	0.3679	0.4863	0.1285	0.0577	0.126	0.0283	0.0272	0.0434	0.0268	0.1764	0.4143	0.633	0.6017	0.5647	0.1303	0.2855	0.1963	0.4629	0.6105	0.687	0.6674	0.5824	0.7325	0.304	0.204	0.1836	0.0905	0.0813	0.3737	0.5167	0.48	0.4516	1	0.722
ECS-13-5	0.627	0.026	0.0282	0.037	0.2776	0.4039	0.4868	0.5389	0.1811	0.3197	0.1563	0.2877	0.1743	0.2992	0.0955	0.3792	0.5361	0.2238	0.114	0.218	0.0604	0.0687	0.0924	0.0495	0.1049	0.3577	0.4762	0.4942	0.4468	0.2043	0.3538	0.1299	0.3513	0.5344	0.6522	0.5328	0.4807	0.7575	0.2057	0.2269	0.177	0.0648	0.0662	0.2523	0.4325	0.5127	0.3982	0.722	1
UT62	0.6932	0.025	0.0254	0.045	0.3288	0.3854	0.6665	0.4651	0.2512	0.5199	0.1897	0.3216	0.3098	0.4028	0.2324	0.555	0.6225	0.2407	0.223	0.2134	0.1198	0.1328	0.1679	0.1149	0.3312	0.4308	0.6577	0.5262	0.5444	0.3444	0.4609	0.3614	0.5005	0.6717	0.6462	0.5599	0.6228	0.6607	0.3042	0.3306	0.1934	0.0415	0.0473	0.3762	0.5497	0.5137	0.5101	0.6202	0.5234
Cross_Mtn	0.1451	0.1507	0.24	0.119	0.0303	0.0184	0.0746	0.1166	0.015	0.0983	0.0032	0.0194	0.0227	0.0604	0.0266	0.0818	0.0358	0.0042	0.012	0.0028	0.0086	0.0095	0.0141	0.0084	0.1115	0.0481	0.203	0.0751	0.1132	0.0528	0.1351	0.1576	0.1809	0.1295	0.115	0.1744	0.0992	0.1128	0.5156	0.1561	0.0683	0.061	0.091	0.1173	0.2524	0.2599	0.1219	0.1039	0.0597
KY-19-PR7	0.3102	0.4242	0.4399	0.4642	0.0108	0.0344	0.1695	0.265	0.0102	0.1353	0.0061	9.4861e-07	0.0018	0.0318	0.00073475	0.1184	0.0114	0.00067468	0.00050314	3.3084e-05	0.0127	0.0068	0.0099	0.0105	0.0285	0.1326	0.276	0.205	0.2478	0.0369	0.1846	0.0245	0.1416	0.2738	0.1935	0.3837	0.1322	0.1363	0.5752	0.4184	0.6814	0.0665	0.1467	0.0936	0.2299	0.1716	0.4597	0.1341	0.112
B_Wescogame	0.6969	0.0746	0.0571	0.112	0.2667	0.3124	0.6154	0.5611	0.1807	0.3688	0.1308	0.2909	0.3067	0.3851	0.2219	0.4407	0.4579	0.1939	0.203	0.1782	0.0817	0.0963	0.1258	0.0756	0.0679	0.4499	0.5461	0.4671	0.4414	0.2722	0.4097	0.1028	0.2714	0.6445	0.6058	0.5483	0.4596	0.5194	0.2899	0.3227	0.4146	0.0317	0.0491	0.2652	0.3886	0.4457	0.5107	0.465	0.5111
Battle	0.0363	0.00014088	0.00015552	0.00082045	3.1655e-06	9.7771e-05	0.0018	0.0499	0.0016	0.0003551	0.0022	0.0041	0.0671	0.00025933	0.0025	0.0049	0.0189	3.6513e-05	0.00086061	0.00013025	0.00097424	0.0029	0.0021	0.0023	4.1946e-08	0.048	0.0296	0.0245	2.2779e-06	7.101e-05	8.9103e-05	0.0115	0.0037	0.0472	0.0203	0.0252	0.0168	0.0016	0.0643	0.0023	0.0017	0.0605	0.0365	0.2096	0.0327	0.0298	0.00082594	0.0647	0.0583
07-CM-001	0.7359	0.071	0.0738	0.0768	0.2109	0.3242	0.6528	0.4996	0.1421	0.4039	0.0936	0.2384	0.212	0.298	0.1754	0.44	0.5264	0.1899	0.17	0.1674	0.0385	0.0431	0.0676	0.0398	0.1673	0.5085	0.6724	0.5561	0.529	0.2158	0.3444	0.2914	0.51	0.6797	0.6443	0.6917	0.558	0.6944	0.3858	0.2568	0.2599	0.0972	0.0965	0.3047	0.5045	0.5737	0.5	0.7511	0.6012
07-BC-001	0.6939	0.2557	0.2556	0.2749	0.1514	0.2347	0.4978	0.4892	0.1225	0.372	0.0784	0.143	0.123	0.2442	0.0924	0.3848	0.3022	0.102	0.0937	0.0966	0.0504	0.0476	0.0669	0.0505	0.1904	0.3819	0.5968	0.4691	0.4931	0.2025	0.3864	0.2101	0.3663	0.6621	0.5371	0.6997	0.4513	0.5019	0.68	0.4002	0.4912	0.0852	0.1175	0.2646	0.5223	0.5455	0.5759	0.5105	0.4106
07-BHU-001	0.709	0.2568	0.2516	0.2657	0.2183	0.2335	0.5506	0.5494	0.1426	0.3541	0.0889	0.2597	0.2821	0.3661	0.225	0.4269	0.3808	0.1675	0.2027	0.1495	0.051	0.0649	0.0862	0.0469	0.1271	0.2997	0.5889	0.401	0.3808	0.269	0.408	0.2329	0.3172	0.6784	0.5613	0.6642	0.4191	0.4858	0.5879	0.3849	0.4667	0.0644	0.1028	0.2261	0.5416	0.5485	0.5731	0.4057	0.3934
Quad1	0.4847	0.2046	0.1871	0.1957	0.0696	0.1071	0.2347	0.2727	0.0467	0.1794	0.0218	0.1031	0.1269	0.142	0.0984	0.211	0.1909	0.0613	0.0759	0.0525	0.0099	0.0085	0.0162	0.0105	0.3163	0.2523	0.3401	0.2866	0.2117	0.1251	0.1856	0.3885	0.2977	0.4627	0.3956	0.4717	0.2767	0.3042	0.5582	0.2451	0.2552	0.1464	0.1462	0.3226	0.4253	0.4721	0.4211	0.3222	0.2929
Spray_Lakes	0.5902	0.2187	0.2125	0.2788	0.2404	0.2575	0.4028	0.44	0.1672	0.3163	0.1385	0.1604	0.1907	0.2905	0.1065	0.3559	0.2667	0.1059	0.1054	0.1049	0.109	0.1133	0.1372	0.0864	0.1434	0.2911	0.4545	0.3924	0.3742	0.2763	0.4126	0.2729	0.3498	0.5617	0.4909	0.522	0.3373	0.4017	0.5331	0.471	0.4335	0.0701	0.104	0.3919	0.5296	0.4504	0.5254	0.3826	0.4381
IB_D1	0.0706	0.2248	0.2467	0.1905	0.0021	0.00055273	0.0196	0.0623	0.0015	0.0364	0.003	0.0019	0.0064	0.0013	0.0014	0.0906	0.0015	0.0031	0.0032	0.002	0.0024	0.0026	0.0032	0.0029	0.0615	0.0294	0.0797	0.0266	0.0722	0.0017	0.0662	0.0271	0.0489	0.0607	0.0319	0.1206	0.0858	0.0652	0.4275	0.1224	0.2494	0.0081	0.0217	0.0696	0.0938	0.0904	0.1035	0.0251	0.0071
IB_D3	0.1438	0.2627	0.2883	0.2585	0.00060643	0.0018	0.0459	0.1029	0.00022329	0.0486	4.2681e-05	0.0019	0.0053	0.0113	0.0021	0.0456	0.00079599	0.003	0.0024	0.0019	0.00036612	0.0006136	0.00050737	8.3627e-06	0.1907	0.0805	0.1472	0.086	0.1215	0.0228	0.1105	0.1507	0.1775	0.1309	0.0994	0.1754	0.0856	0.0847	0.5665	0.2809	0.3283	0.0328	0.0649	0.1407	0.2427	0.1853	0.2724	0.0722	0.0382
IB_D2	0.1289	0.405	0.3735	0.3981	0.001	0.00063422	0.048	0.1046	0.00068627	0.0468	0.0014	0.0014	0.0052	0.0075	0.0013	0.0642	0.00081726	0.0033	0.0024	0.0016	0.00080342	0.0016	0.0016	0.0015	0.0493	0.0647	0.1189	0.0597	0.0936	0.0067	0.0844	0.0545	0.1125	0.1208	0.0704	0.1785	0.0788	0.0861	0.524	0.1846	0.3913	0.03	0.0567	0.081	0.1317	0.1373	0.2082	0.0441	0.0182
IB_D4	0.1796	0.3161	0.4677	0.265	0.0023	0.006	0.0499	0.139	0.0024	0.0777	3.3022e-06	0.00057149	0.0051	0.01	0.0019	0.0603	0.0049	0.0025	0.0022	0.0015	0.0013	3.3027e-05	0.0008086	0.0013	0.1222	0.0416	0.1843	0.11	0.1479	0.02	0.1042	0.0719	0.0953	0.1383	0.1168	0.2716	0.0744	0.0775	0.6655	0.2603	0.2347	0.0409	0.1018	0.0942	0.2368	0.1766	0.2516	0.0959	0.0541
FCB_D1	0.262	0.4398	0.4977	0.4478	0.0036	0.0185	0.1238	0.2444	0.0038	0.1009	0.0012	0.00024858	0.0048	0.0165	0.0021	0.089	0.005	0.0022	0.0022	0.00075143	0.0044	0.0012	0.0027	0.0035	0.0271	0.1017	0.2341	0.133	0.1778	0.0189	0.1625	0.0119	0.0854	0.2211	0.1509	0.3618	0.1059	0.1078	0.6039	0.3147	0.5941	0.0474	0.1166	0.0668	0.1846	0.1553	0.3834	0.111	0.0781
FCB_D2	0.5394	0.4142	0.4695	0.4098	0.072	0.1012	0.3054	0.4623	0.0451	0.2645	0.0256	0.0396	0.029	0.1266	0.0241	0.2458	0.1075	0.0181	0.0201	0.0185	0.0268	0.0258	0.0348	0.0224	0.1015	0.1815	0.4083	0.3644	0.3558	0.1246	0.3026	0.085	0.2272	0.4802	0.4032	0.623	0.2767	0.301	0.7867	0.3736	0.5394	0.0935	0.1744	0.1645	0.439	0.3752	0.4763	0.3177	0.2549
FCB_D3	0.263	0.4363	0.4783	0.4301	0.0057	0.0194	0.0963	0.1953	0.0073	0.1157	0.003	1.5994e-05	0.002	0.0255	0.0008498	0.0994	0.0059	0.00067419	0.0009315	9.5925e-05	0.0057	0.0025	0.0042	0.0042	0.1408	0.0944	0.2143	0.1577	0.2122	0.0404	0.1705	0.0966	0.1624	0.2326	0.1668	0.3497	0.1206	0.1253	0.7648	0.3143	0.4735	0.0594	0.1165	0.1378	0.281	0.2211	0.3645	0.1231	0.0826
FCB_D4	0.0122	0.0443	0.0498	0.0381	0.00012357	6.9957e-05	0.0049	0.0037	6.6149e-05	0.0236	9.9049e-05	0.001	0.0032	0.00056196	9.0384e-05	0.0715	0.0003831	0.00066569	0.0014	0.00049265	5.4451e-07	2.6316e-05	8.5049e-05	1.1494e-05	0.0909	0.0118	0.0226	0.007	0.0479	0.0017	0.031	0.0616	0.0624	0.0111	0.0093	0.0172	0.0661	0.0581	0.148	0.0729	0.0447	0.00044259	0.00079979	0.0677	0.0439	0.0432	0.0247	0.0105	0.00065878
S4	0.2397	0.1898	0.2345	0.1715	0.0369	0.0169	0.1362	0.2096	0.0054	0.1199	0.00044972	0.0093	0.0229	0.0435	0.0303	0.2829	0.0401	0.00068554	0.0063	6.5244e-05	0.0127	0.0147	0.0118	0.0178	0.0406	0.0594	0.1899	0.1316	0.144	0.0347	0.1237	0.0435	0.0751	0.2091	0.1682	0.2913	0.2307	0.1587	0.3805	0.2554	0.3179	0.0758	0.1281	0.0929	0.1847	0.1677	0.2667	0.0941	0.0735
S5	0.1491	0.1832	0.2301	0.147	0.0064	0.0051	0.0604	0.1221	3.0285e-05	0.0729	0.00049292	0.0016	1.0176e-05	0.0112	0.0021	0.1582	0.0243	2.1245e-05	7.2151e-05	0.00013303	2.0913e-11	6.553e-05	5.1787e-07	7.8663e-05	0.1561	0.0567	0.122	0.0775	0.1451	0.0107	0.0692	0.064	0.0849	0.1158	0.1255	0.1868	0.2203	0.1788	0.3651	0.1763	0.1684	0.0238	0.0426	0.1092	0.1774	0.1741	0.1741	0.0914	0.0697
S6	0.1238	0.1627	0.232	0.1465	0.0212	0.0207	0.0676	0.1068	0.0086	0.0861	0.0042	0.0036	0.0031	0.0188	0.0061	0.2143	0.0109	0.0017	0.0032	0.0013	0.0108	0.0106	0.0088	0.013	0.0617	0.0533	0.1522	0.0601	0.1221	0.0226	0.1137	0.0275	0.0594	0.0985	0.0807	0.1739	0.1687	0.1165	0.3387	0.2132	0.2421	0.0475	0.0766	0.0963	0.1134	0.0802	0.138	0.0774	0.041
S7	0.2169	0.355	0.4263	0.2942	0.0092	0.0178	0.112	0.2227	0.0023	0.0921	8.259e-05	0.0166	0.0093	0.0351	0.0144	0.204	0.0171	0.0061	0.0089	0.0061	0.00013108	1.3836e-05	5.2655e-05	0.00018394	0.0311	0.0946	0.2154	0.0891	0.1156	0.0218	0.1234	0.0184	0.0613	0.1772	0.1294	0.3062	0.1748	0.1658	0.5206	0.2207	0.3794	0.0436	0.0776	0.1088	0.1776	0.1497	0.2232	0.1182	0.0873
S8	0.084	0.2236	0.272	0.1863	0.00051051	0.0007141	0.028	0.0738	4.5509e-05	0.0443	0.00098179	0.00094845	0.0047	0.0026	0.00058008	0.1286	0.00036416	0.0022	0.0017	0.002	0.00033156	0.00087494	3.1232e-07	0.0013	0.0741	0.0213	0.1077	0.0409	0.0954	0.0051	0.0776	0.0102	0.0306	0.0615	0.0449	0.1399	0.1155	0.061	0.3608	0.2648	0.2987	0.0124	0.0376	0.0535	0.0906	0.0658	0.1389	0.0293	0.014
O_M source	0.2726	0.4344	0.5195	0.4638	0.0354	0.0416	0.1173	0.2701	0.0186	0.1393	0.016	0.00010303	0.0006453	0.0506	0.00084137	0.072	0.0109	0.0016	0.00052466	0.00036591	0.0378	0.0385	0.0428	0.0241	0.0062	0.052	0.1493	0.1937	0.184	0.0889	0.1999	0.0075	0.1249	0.2103	0.2156	0.337	0.0945	0.0891	0.5163	0.3117	0.3907	0.125	0.2892	0.0499	0.2455	0.1624	0.3007	0.1059	0.1001
Central_App_Crys	0.296	0.3479	0.3987	0.3765	0.0112	0.0294	0.1485	0.2693	0.0121	0.1428	0.0069	7.3365e-05	0.0021	0.027	0.001	0.104	0.0106	0.0015	0.00098339	0.00041195	0.0172	0.0112	0.0143	0.0142	0.031	0.1019	0.2539	0.1955	0.2354	0.0416	0.2011	0.0156	0.0961	0.263	0.177	0.3783	0.121	0.1108	0.5844	0.3819	0.6045	0.0558	0.1382	0.0732	0.2282	0.154	0.4115	0.1243	0.0957
N_Appalachian	0.1416	0.0818	0.0963	0.0749	0.0011	0.0026	0.0416	0.0557	0.0021	0.0732	0.00049233	0.00035555	3.0565e-09	0.0069	0.00065228	0.0635	0.0197	7.8362e-06	3.401e-05	7.5854e-05	0.00087587	0.00056917	0.00055717	0.00086614	0.4392	0.0483	0.123	0.0912	0.132	0.0316	0.0864	0.5279	0.1888	0.1393	0.1157	0.1569	0.1136	0.1118	0.4491	0.1641	0.1088	0.0179	0.0205	0.2411	0.3029	0.1828	0.2828	0.0869	0.0433
NW_Arctic	0.242	0.0038	0.0032	0.0069	0.0262	0.0353	0.098	0.168	0.0158	0.0923	0.0075	0.033	0.1018	0.0489	0.0325	0.1207	0.1202	0.0094	0.0154	0.0081	0.0133	0.0098	0.0127	0.0113	0.1452	0.2479	0.1711	0.1757	0.1198	0.0537	0.0748	0.1816	0.1632	0.2567	0.1989	0.1825	0.1996	0.1175	0.2209	0.0794	0.0856	0.0404	0.0276	0.4059	0.2521	0.2182	0.1426	0.2086	0.2202
NE_Arctic	0.4765	0.058	0.0618	0.0661	0.1046	0.131	0.2434	0.3304	0.0636	0.246	0.0401	0.0833	0.0945	0.1326	0.0526	0.3651	0.2104	0.0517	0.0378	0.0475	0.0358	0.0364	0.0405	0.0383	0.2113	0.3241	0.3383	0.3391	0.3318	0.1182	0.2347	0.2276	0.3545	0.4365	0.4205	0.4399	0.4207	0.4002	0.3952	0.3012	0.283	0.0751	0.0707	0.4102	0.4361	0.4374	0.3204	0.388	0.3945
Sonora	0.4233	0.0124	0.0086	0.0383	0.3575	0.3927	0.3635	0.2992	0.2702	0.3051	0.2267	0.2763	0.3613	0.3837	0.201	0.3333	0.3788	0.2012	0.2029	0.1951	0.18	0.1836	0.2242	0.165	0.0122	0.1638	0.2843	0.3455	0.2328	0.3238	0.3788	0.1135	0.2197	0.4392	0.398	0.309	0.2662	0.2912	0.1421	0.163	0.1072	0.4387	0.4022	0.1535	0.2406	0.2858	0.2263	0.3618	0.3884
KS	AZShelf2	MS04	MS05	MS06	MC05	GS01	GS09	MC17	GS11	MC20	GS24	V18	V20	EC01	RC01	RC19	V10	V01	V22	V25	DMR01	LC01	SP01	CF02	HT02	HT14	HT04	HT20	HT24	KA03	MP-DZ2	DryCreek	Pedreg	5PS-42	5PS-58	5PS-82	1WM-302	1PL-534	KC-2	Z1	Z4	OK-1-VN	OK-2-V2	01PL12	04TD10	14TD10	ECS-13-2	ECS-13-4	ECS-13-5
AZShelf2	0	0.7757	0.7443	0.569	0.2474	0.2297	0.1364	0.0825	0.2725	0.1392	0.3157	0.5434	0.5742	0.2214	0.5393	0.1424	0.2173	0.5354	0.5948	0.5727	0.2987	0.2975	0.3314	0.2928	0.4388	0.108	0.1281	0.0844	0.1939	0.1745	0.2127	0.2155	0.1001	0.0372	0.0433	0.06	0.1894	0.1112	0.2883	0.2854	0.3068	0.3909	0.3518	0.1696	0.1156	0.1204	0.1706	0.0918	0.1358
MS04	0.7757	0	0.2157	0.296	0.9146	0.9005	0.8385	0.7833	0.9057	0.7827	0.9536	0.9164	0.977	0.8495	0.9331	0.699	0.9113	0.9426	0.97	0.9626	0.9341	0.9258	0.9618	0.9152	0.5	0.8111	0.7313	0.8069	0.7354	0.8305	0.7071	0.624	0.722	0.7974	0.7919	0.7263	0.661	0.7328	0.4983	0.6167	0.6398	0.825	0.8109	0.6873	0.6928	0.7098	0.7437	0.8097	0.8507
MS05	0.7443	0.2157	0	0.3679	0.8855	0.8711	0.8091	0.7545	0.8862	0.744	0.9341	0.9167	0.9589	0.8204	0.9398	0.6699	0.8822	0.9471	0.9691	0.9533	0.9146	0.9063	0.9423	0.8957	0.5	0.7817	0.7019	0.7774	0.706	0.8095	0.6774	0.5949	0.6927	0.7655	0.7592	0.697	0.6277	0.6993	0.4689	0.6037	0.6182	0.7949	0.7785	0.6486	0.6637	0.6806	0.7143	0.7711	0.8123
MS06	0.569	0.296	0.3679	0	0.711	0.6961	0.634	0.5494	0.7114	0.5695	0.7593	0.9167	0.9452	0.6355	0.9277	0.5278	0.7341	0.9423	0.9598	0.9439	0.7397	0.7315	0.7675	0.7208	0.537	0.6078	0.544	0.5832	0.5247	0.6347	0.5023	0.5315	0.537	0.5809	0.5902	0.5384	0.5035	0.5604	0.3216	0.4055	0.3846	0.6155	0.604	0.5115	0.5254	0.577	0.49	0.6481	0.617
MC05	0.2474	0.9146	0.8855	0.711	0	0.0999	0.2163	0.2992	0.1034	0.2573	0.2166	0.4167	0.51	0.1176	0.4908	0.3158	0.2414	0.4281	0.5251	0.4439	0.2836	0.2428	0.1915	0.2836	0.5242	0.2535	0.3349	0.2626	0.2869	0.1478	0.2971	0.3297	0.2649	0.2308	0.2145	0.3038	0.3361	0.2916	0.5321	0.492	0.5472	0.5023	0.4358	0.3179	0.2854	0.2726	0.4081	0.2123	0.2357
GS01	0.2297	0.9005	0.8711	0.6961	0.0999	0	0.175	0.2843	0.0925	0.2086	0.1574	0.4571	0.547	0.1774	0.5567	0.2816	0.2179	0.4806	0.5745	0.4909	0.3143	0.319	0.2416	0.2947	0.5354	0.2192	0.3007	0.2563	0.2646	0.1818	0.3198	0.2955	0.2559	0.1998	0.2173	0.2725	0.31	0.259	0.5015	0.4669	0.507	0.4267	0.3907	0.2979	0.2852	0.2507	0.3736	0.1729	0.1885
GS09	0.1364	0.8385	0.8091	0.634	0.2163	0.175	0	0.1199	0.2126	0.1247	0.2589	0.6105	0.6391	0.2857	0.5956	0.1749	0.2415	0.6025	0.6525	0.6378	0.2805	0.2585	0.2677	0.2688	0.4943	0.1754	0.1716	0.1218	0.1721	0.1486	0.2246	0.2286	0.1425	0.1411	0.1281	0.1317	0.23	0.1338	0.3571	0.3212	0.3504	0.4737	0.4208	0.2105	0.1652	0.2095	0.209	0.166	0.1724
MC17	0.0825	0.7833	0.7545	0.5494	0.2992	0.2843	0.1199	0	0.3319	0.1287	0.3702	0.58	0.6185	0.2648	0.5747	0.1707	0.2491	0.5819	0.6316	0.6177	0.3503	0.3517	0.3777	0.3503	0.4505	0.122	0.1015	0.077	0.1802	0.2237	0.1671	0.2338	0.1197	0.098	0.0971	0.0734	0.2121	0.1217	0.2915	0.2452	0.2777	0.4202	0.385	0.2036	0.1197	0.1693	0.1287	0.132	0.154
GS11	0.2725	0.9057	0.8862	0.7114	0.1034	0.0925	0.2126	0.3319	0	0.2428	0.1541	0.4167	0.5131	0.1427	0.5583	0.3179	0.236	0.4423	0.523	0.4535	0.2547	0.2925	0.1883	0.2453	0.5262	0.2555	0.337	0.304	0.3061	0.2208	0.3144	0.3318	0.2942	0.2374	0.2617	0.3168	0.3578	0.3015	0.5425	0.5052	0.5492	0.4805	0.4223	0.3457	0.3242	0.2782	0.42	0.22	0.2362
MC20	0.1392	0.7827	0.744	0.5695	0.2573	0.2086	0.1247	0.1287	0.2428	0	0.2817	0.6394	0.668	0.3044	0.632	0.1256	0.3281	0.6314	0.6906	0.6667	0.2508	0.252	0.288	0.2513	0.3971	0.221	0.1488	0.1344	0.0964	0.1969	0.2198	0.1843	0.1602	0.1561	0.1517	0.126	0.1526	0.1522	0.3387	0.3015	0.3493	0.4755	0.4079	0.2228	0.1563	0.2351	0.2178	0.1842	0.253
GS24	0.3157	0.9536	0.9341	0.7593	0.2166	0.1574	0.2589	0.3702	0.1541	0.2817	0	0.463	0.6375	0.236	0.6896	0.3657	0.3029	0.4749	0.62	0.4902	0.1883	0.2037	0.1489	0.1892	0.5741	0.3034	0.3848	0.343	0.3543	0.2045	0.3617	0.3796	0.3148	0.2982	0.3032	0.3617	0.3967	0.3444	0.5873	0.5404	0.5971	0.5251	0.4651	0.3939	0.37	0.3357	0.4587	0.259	0.2844
V18	0.5434	0.9164	0.9167	0.9167	0.4167	0.4571	0.6105	0.58	0.4167	0.6394	0.463	0	0.3364	0.335	0.3748	0.5556	0.4087	0.2484	0.3033	0.2952	0.6242	0.5833	0.5513	0.6336	0.75	0.555	0.6198	0.6157	0.6758	0.4722	0.5922	0.5167	0.5833	0.5254	0.5446	0.5889	0.609	0.564	0.6514	0.6535	0.7093	0.4535	0.4248	0.5459	0.5762	0.4672	0.6691	0.5365	0.4967
V20	0.5742	0.977	0.9589	0.9452	0.51	0.547	0.6391	0.6185	0.5131	0.668	0.6375	0.3364	0	0.4304	0.2281	0.6121	0.4799	0.4671	0.2973	0.4993	0.6528	0.6119	0.5798	0.6622	0.7785	0.585	0.6483	0.6442	0.7348	0.5008	0.6321	0.5452	0.6126	0.5539	0.5827	0.6202	0.6403	0.6325	0.6799	0.6947	0.7379	0.4456	0.4517	0.5832	0.6048	0.4958	0.7038	0.5982	0.5504
EC01	0.2214	0.8495	0.8204	0.6355	0.1176	0.1774	0.2857	0.2648	0.1427	0.3044	0.236	0.335	0.4304	0	0.4789	0.2622	0.2052	0.3505	0.4381	0.3623	0.341	0.3095	0.2588	0.3308	0.4943	0.2421	0.2848	0.2807	0.3809	0.1373	0.2797	0.2534	0.2483	0.1937	0.2295	0.2671	0.2904	0.2823	0.4524	0.4055	0.4709	0.4766	0.4208	0.2423	0.2412	0.2197	0.3539	0.2374	0.1988
RC01	0.5393	0.9331	0.9398	0.9277	0.4908	0.5567	0.5956	0.5747	0.5583	0.632	0.6896	0.3748	0.2281	0.4789	0	0.574	0.4548	0.5162	0.2212	0.5601	0.6473	0.6064	0.5551	0.6473	0.7249	0.5604	0.6067	0.5906	0.7112	0.5263	0.608	0.5036	0.5776	0.5116	0.5427	0.5869	0.6048	0.6111	0.6349	0.669	0.6964	0.4526	0.4171	0.5433	0.5526	0.4646	0.6638	0.5678	0.5295
RC19	0.1424	0.699	0.6699	0.5278	0.3158	0.2816	0.1749	0.1707	0.3179	0.1256	0.3657	0.5556	0.6121	0.2622	0.574	0	0.2857	0.57	0.6326	0.6151	0.3462	0.338	0.3739	0.3318	0.3472	0.1868	0.1024	0.1363	0.1391	0.2412	0.1714	0.175	0.1574	0.1682	0.1381	0.1441	0.1113	0.0977	0.2401	0.2266	0.2608	0.4658	0.4273	0.2088	0.1655	0.2082	0.1371	0.1667	0.1811
V10	0.2173	0.9113	0.8822	0.7341	0.2414	0.2179	0.2415	0.2491	0.236	0.3281	0.3029	0.4087	0.4799	0.2052	0.4548	0.2857	0	0.4022	0.4937	0.4425	0.4441	0.4127	0.3677	0.4377	0.4921	0.2361	0.2793	0.2836	0.3705	0.2453	0.3897	0.2873	0.2381	0.2051	0.2126	0.2434	0.2857	0.2203	0.4626	0.4515	0.4791	0.418	0.3492	0.2663	0.2781	0.2147	0.3479	0.1651	0.1537
V01	0.5354	0.9426	0.9471	0.9423	0.4281	0.4806	0.6025	0.5819	0.4423	0.6314	0.4749	0.2484	0.4671	0.3505	0.5162	0.57	0.4022	0	0.3597	0.1412	0.6547	0.6138	0.5673	0.6593	0.742	0.5518	0.6118	0.6077	0.6899	0.4777	0.5871	0.5087	0.5753	0.5173	0.5384	0.5808	0.601	0.5741	0.6442	0.6576	0.7158	0.4916	0.4316	0.5379	0.5682	0.4592	0.6614	0.5513	0.5046
V22	0.5948	0.97	0.9691	0.9598	0.5251	0.5745	0.6525	0.6316	0.523	0.6906	0.62	0.3033	0.2973	0.4381	0.2212	0.6326	0.4937	0.3597	0	0.4367	0.6834	0.6418	0.5941	0.6929	0.7818	0.619	0.6569	0.6475	0.7578	0.504	0.6534	0.5548	0.6233	0.5703	0.5996	0.6372	0.6634	0.6697	0.69	0.7276	0.7533	0.501	0.4555	0.6011	0.608	0.5224	0.7207	0.6143	0.5781
V25	0.5727	0.9626	0.9533	0.9439	0.4439	0.4909	0.6378	0.6177	0.4535	0.6667	0.4902	0.2952	0.4993	0.3623	0.5601	0.6151	0.4425	0.1412	0.4367	0	0.6516	0.6199	0.5785	0.6609	0.7773	0.5822	0.6471	0.643	0.7215	0.4995	0.6233	0.5439	0.6106	0.5526	0.5752	0.6161	0.6362	0.6083	0.6786	0.6808	0.7366	0.511	0.4505	0.5731	0.6035	0.4945	0.697	0.5822	0.5352
DMR01	0.2987	0.9341	0.9146	0.7397	0.2836	0.3143	0.2805	0.3503	0.2547	0.2508	0.1883	0.6242	0.6528	0.341	0.6473	0.3462	0.4441	0.6547	0.6834	0.6516	0	0.1887	0.103	0.1226	0.5545	0.3246	0.3653	0.3129	0.3274	0.2234	0.3417	0.3601	0.2952	0.2934	0.2895	0.3507	0.372	0.3329	0.5768	0.5223	0.5803	0.5254	0.4644	0.3704	0.3501	0.3254	0.4483	0.3648	0.3281
LC01	0.2975	0.9258	0.9063	0.7315	0.2428	0.319	0.2585	0.3517	0.2925	0.252	0.2037	0.5833	0.6119	0.3095	0.6064	0.338	0.4127	0.6138	0.6418	0.6199	0.1887	0	0.1934	0.2362	0.5463	0.2979	0.3634	0.3143	0.3286	0.1936	0.3524	0.3519	0.287	0.2629	0.284	0.3458	0.3693	0.3352	0.578	0.5141	0.5815	0.5465	0.4837	0.3622	0.3515	0.3172	0.4401	0.3333	0.2967
SP01	0.3314	0.9618	0.9423	0.7675	0.1915	0.2416	0.2677	0.3777	0.1883	0.288	0.1489	0.5513	0.5798	0.2588	0.5551	0.3739	0.3677	0.5673	0.5941	0.5785	0.103	0.1934	0	0.1018	0.5823	0.3116	0.393	0.3498	0.3646	0.1732	0.3788	0.3878	0.323	0.2989	0.3167	0.3784	0.4052	0.3659	0.614	0.5501	0.6175	0.5177	0.4581	0.3981	0.3775	0.3532	0.4761	0.2821	0.2812
CF02	0.2928	0.9152	0.8957	0.7208	0.2836	0.2947	0.2688	0.3503	0.2453	0.2513	0.1892	0.6336	0.6622	0.3308	0.6473	0.3318	0.4377	0.6593	0.6929	0.6609	0.1226	0.2362	0.1018	0	0.5356	0.3246	0.362	0.3132	0.3249	0.2227	0.3417	0.3412	0.2942	0.2995	0.2856	0.3384	0.3696	0.3245	0.5674	0.5109	0.5709	0.5371	0.4775	0.3645	0.3501	0.3066	0.4295	0.3365	0.3275
HT02	0.4388	0.5	0.5	0.537	0.5242	0.5354	0.4943	0.4505	0.5262	0.3971	0.5741	0.75	0.7785	0.4943	0.7249	0.3472	0.4921	0.742	0.7818	0.7773	0.5545	0.5463	0.5823	0.5356	0	0.4492	0.3993	0.4391	0.3752	0.4545	0.3571	0.2722	0.3889	0.4599	0.4393	0.4272	0.2753	0.3661	0.3163	0.3187	0.378	0.4887	0.4935	0.3031	0.3936	0.4095	0.4367	0.4317	0.4956
HT14	0.108	0.8111	0.7817	0.6078	0.2535	0.2192	0.1754	0.122	0.2555	0.221	0.3034	0.555	0.585	0.2421	0.5604	0.1868	0.2361	0.5518	0.619	0.5822	0.3246	0.2979	0.3116	0.3246	0.4492	0	0.1715	0.1704	0.2564	0.1969	0.2409	0.2057	0.1355	0.0986	0.1054	0.1402	0.1951	0.1452	0.3247	0.3275	0.3334	0.4371	0.3986	0.1745	0.1809	0.1788	0.2507	0.0932	0.167
HT04	0.1281	0.7313	0.7019	0.544	0.3349	0.3007	0.1716	0.1015	0.337	0.1488	0.3848	0.6198	0.6483	0.2848	0.6067	0.1024	0.2793	0.6118	0.6569	0.6471	0.3653	0.3634	0.393	0.362	0.3993	0.1715	0	0.1538	0.1424	0.2603	0.185	0.1719	0.1412	0.1353	0.1405	0.1163	0.1636	0.109	0.2494	0.273	0.2576	0.4724	0.3983	0.2072	0.1184	0.1959	0.1211	0.1586	0.1963
HT20	0.0844	0.8069	0.7774	0.5832	0.2626	0.2563	0.1218	0.077	0.304	0.1344	0.343	0.6157	0.6442	0.2807	0.5906	0.1363	0.2836	0.6077	0.6475	0.643	0.3129	0.3143	0.3498	0.3132	0.4391	0.1704	0.1538	0	0.134	0.1871	0.1984	0.2113	0.1039	0.1048	0.1131	0.0988	0.1718	0.11	0.3243	0.2736	0.3404	0.3923	0.3571	0.148	0.1425	0.1929	0.1834	0.1439	0.2005
HT24	0.1939	0.7354	0.706	0.5247	0.2869	0.2646	0.1721	0.1802	0.3061	0.0964	0.3543	0.6758	0.7348	0.3809	0.7112	0.1391	0.3705	0.6899	0.7578	0.7215	0.3274	0.3286	0.3646	0.3249	0.3752	0.2564	0.1424	0.134	0	0.2641	0.16	0.2197	0.1536	0.2103	0.2033	0.1619	0.1271	0.1997	0.2618	0.2317	0.2777	0.444	0.4084	0.1947	0.1822	0.278	0.1443	0.2383	0.2849
KA03	0.1745	0.8305	0.8095	0.6347	0.1478	0.1818	0.1486	0.2237	0.2208	0.1969	0.2045	0.4722	0.5008	0.1373	0.5263	0.2412	0.2453	0.4777	0.504	0.4995	0.2234	0.1936	0.1732	0.2227	0.4545	0.1969	0.2603	0.1871	0.2641	0	0.2225	0.2551	0.1801	0.1729	0.1537	0.2255	0.2514	0.2077	0.4474	0.4072	0.4645	0.4464	0.4109	0.2451	0.2235	0.2092	0.3233	0.1657	0.179
MP-DZ2	0.2127	0.7071	0.6774	0.5023	0.2971	0.3198	0.2246	0.1671	0.3144	0.2198	0.3617	0.5922	0.6321	0.2797	0.608	0.1714	0.3897	0.5871	0.6534	0.6233	0.3417	0.3524	0.3788	0.3417	0.3571	0.2409	0.185	0.1984	0.16	0.2225	0	0.2109	0.1781	0.2246	0.2338	0.1821	0.1445	0.2067	0.2455	0.1948	0.2556	0.4451	0.3848	0.1994	0.1691	0.2231	0.1262	0.2892	0.2525
DryCreek	0.2155	0.624	0.5949	0.5315	0.3297	0.2955	0.2286	0.2338	0.3318	0.1843	0.3796	0.5167	0.5452	0.2534	0.5036	0.175	0.2873	0.5087	0.5548	0.5439	0.3601	0.3519	0.3878	0.3412	0.2722	0.2057	0.1719	0.2113	0.2197	0.2551	0.2109	0	0.1352	0.2432	0.1903	0.2138	0.1196	0.1658	0.2296	0.2605	0.2516	0.3653	0.3078	0.1333	0.1876	0.1822	0.214	0.1976	0.2367
Pedreg	0.1001	0.722	0.6927	0.537	0.2649	0.2559	0.1425	0.1197	0.2942	0.1602	0.3148	0.5833	0.6126	0.2483	0.5776	0.1574	0.2381	0.5753	0.6233	0.6106	0.2952	0.287	0.323	0.2942	0.3889	0.1355	0.1412	0.1039	0.1536	0.1801	0.1781	0.1352	0	0.1147	0.0978	0.1018	0.1321	0.1066	0.291	0.2661	0.2945	0.3439	0.3072	0.1296	0.0792	0.1729	0.1531	0.1265	0.1881
5PS-42	0.0372	0.7974	0.7655	0.5809	0.2308	0.1998	0.1411	0.098	0.2374	0.1561	0.2982	0.5254	0.5539	0.1937	0.5116	0.1682	0.2051	0.5173	0.5703	0.5526	0.2934	0.2629	0.2989	0.2995	0.4599	0.0986	0.1353	0.1048	0.2103	0.1729	0.2246	0.2432	0.1147	0	0.0562	0.0947	0.2181	0.1349	0.3151	0.3058	0.3276	0.3898	0.351	0.1879	0.1501	0.1146	0.1872	0.0713	0.1319
5PS-58	0.0433	0.7919	0.7592	0.5902	0.2145	0.2173	0.1281	0.0971	0.2617	0.1517	0.3032	0.5446	0.5827	0.2295	0.5427	0.1381	0.2126	0.5384	0.5996	0.5752	0.2895	0.284	0.3167	0.2856	0.4393	0.1054	0.1405	0.1131	0.2033	0.1537	0.2338	0.1903	0.0978	0.0562	0	0.1017	0.1694	0.1048	0.33	0.3019	0.3451	0.3804	0.3451	0.148	0.1211	0.1057	0.2093	0.0846	0.1148
5PS-82	0.06	0.7263	0.697	0.5384	0.3038	0.2725	0.1317	0.0734	0.3168	0.126	0.3617	0.5889	0.6202	0.2671	0.5869	0.1441	0.2434	0.5808	0.6372	0.6161	0.3507	0.3458	0.3784	0.3384	0.4272	0.1402	0.1163	0.0988	0.1619	0.2255	0.1821	0.2138	0.1018	0.0947	0.1017	0	0.1954	0.0952	0.2401	0.2436	0.2647	0.4039	0.365	0.1771	0.0782	0.1731	0.1142	0.1336	0.1858
1WM-302	0.1894	0.661	0.6277	0.5035	0.3361	0.31	0.23	0.2121	0.3578	0.1526	0.3967	0.609	0.6403	0.2904	0.6048	0.1113	0.2857	0.601	0.6634	0.6362	0.372	0.3693	0.4052	0.3696	0.2753	0.1951	0.1636	0.1718	0.1271	0.2514	0.1445	0.1196	0.1321	0.2181	0.1694	0.1954	0	0.1163	0.2088	0.227	0.2281	0.3943	0.3555	0.1328	0.1519	0.1992	0.1812	0.1751	0.2312
1PL-534	0.1112	0.7328	0.6993	0.5604	0.2916	0.259	0.1338	0.1217	0.3015	0.1522	0.3444	0.564	0.6325	0.2823	0.6111	0.0977	0.2203	0.5741	0.6697	0.6083	0.3329	0.3352	0.3659	0.3245	0.3661	0.1452	0.109	0.11	0.1997	0.2077	0.2067	0.1658	0.1066	0.1349	0.1048	0.0952	0.1163	0	0.2541	0.2842	0.2793	0.4188	0.3833	0.1658	0.1138	0.1768	0.1652	0.1213	0.1347
KC-2	0.2883	0.4983	0.4689	0.3216	0.5321	0.5015	0.3571	0.2915	0.5425	0.3387	0.5873	0.6514	0.6799	0.4524	0.6349	0.2401	0.4626	0.6442	0.69	0.6786	0.5768	0.578	0.614	0.5674	0.3163	0.3247	0.2494	0.3243	0.2618	0.4474	0.2455	0.2296	0.291	0.3151	0.33	0.2401	0.2088	0.2541	0	0.1597	0.2403	0.4047	0.3741	0.218	0.2612	0.283	0.2522	0.3408	0.3646
Z1	0.2854	0.6167	0.6037	0.4055	0.492	0.4669	0.3212	0.2452	0.5052	0.3015	0.5404	0.6535	0.6947	0.4055	0.669	0.2266	0.4515	0.6576	0.7276	0.6808	0.5223	0.5141	0.5501	0.5109	0.3187	0.3275	0.273	0.2736	0.2317	0.4072	0.1948	0.2605	0.2661	0.3058	0.3019	0.2436	0.227	0.2842	0.1597	0	0.1203	0.4315	0.3952	0.2274	0.2424	0.306	0.1759	0.3772	0.3405
Z4	0.3068	0.6398	0.6182	0.3846	0.5472	0.507	0.3504	0.2777	0.5492	0.3493	0.5971	0.7093	0.7379	0.4709	0.6964	0.2608	0.4791	0.7158	0.7533	0.7366	0.5803	0.5815	0.6175	0.5709	0.378	0.3334	0.2576	0.3404	0.2777	0.4645	0.2556	0.2516	0.2945	0.3276	0.3451	0.2647	0.2281	0.2793	0.2403	0.1203	0	0.4587	0.4224	0.2344	0.2724	0.3423	0.1704	0.3618	0.3698
OK-1-VN	0.3909	0.825	0.7949	0.6155	0.5023	0.4267	0.4737	0.4202	0.4805	0.4755	0.5251	0.4535	0.4456	0.4766	0.4526	0.4658	0.418	0.4916	0.501	0.511	0.5254	0.5465	0.5177	0.5371	0.4887	0.4371	0.4724	0.3923	0.444	0.4464	0.4451	0.3653	0.3439	0.3898	0.3804	0.4039	0.3943	0.4188	0.4047	0.4315	0.4587	0	0.093	0.4543	0.3965	0.3578	0.3963	0.3765	0.3919
OK-2-V2	0.3518	0.8109	0.7785	0.604	0.4358	0.3907	0.4208	0.385	0.4223	0.4079	0.4651	0.4248	0.4517	0.4208	0.4171	0.4273	0.3492	0.4316	0.4555	0.4505	0.4644	0.4837	0.4581	0.4775	0.4935	0.3986	0.3983	0.3571	0.4084	0.4109	0.3848	0.3078	0.3072	0.351	0.3451	0.365	0.3555	0.3833	0.3741	0.3952	0.4224	0.093	0	0.4248	0.361	0.3284	0.3521	0.3424	0.3583
01PL12	0.1696	0.6873	0.6486	0.5115	0.3179	0.2979	0.2105	0.2036	0.3457	0.2228	0.3939	0.5459	0.5832	0.2423	0.5433	0.2088	0.2663	0.5379	0.6011	0.5731	0.3704	0.3622	0.3981	0.3645	0.3031	0.1745	0.2072	0.148	0.1947	0.2451	0.1994	0.1333	0.1296	0.1879	0.148	0.1771	0.1328	0.1658	0.218	0.2274	0.2344	0.4543	0.4248	0	0.129	0.1461	0.1621	0.1563	0.2097
04TD10	0.1156	0.6928	0.6637	0.5254	0.2854	0.2852	0.1652	0.1197	0.3242	0.1563	0.37	0.5762	0.6048	0.2412	0.5526	0.1655	0.2781	0.5682	0.608	0.6035	0.3501	0.3515	0.3775	0.3501	0.3936	0.1809	0.1184	0.1425	0.1822	0.2235	0.1691	0.1876	0.0792	0.1501	0.1211	0.0782	0.1519	0.1138	0.2612	0.2424	0.2724	0.3965	0.361	0.129	0	0.1475	0.1326	0.1353	0.1679
14TD10	0.1204	0.7098	0.6806	0.577	0.2726	0.2507	0.2095	0.1693	0.2782	0.2351	0.3357	0.4672	0.4958	0.2197	0.4646	0.2082	0.2147	0.4592	0.5224	0.4945	0.3254	0.3172	0.3532	0.3066	0.4095	0.1788	0.1959	0.1929	0.278	0.2092	0.2231	0.1822	0.1729	0.1146	0.1057	0.1731	0.1992	0.1768	0.283	0.306	0.3423	0.3578	0.3284	0.1461	0.1475	0	0.2252	0.1161	0.1509
ECS-13-2	0.1706	0.7437	0.7143	0.49	0.4081	0.3736	0.209	0.1287	0.42	0.2178	0.4587	0.6691	0.7038	0.3539	0.6638	0.1371	0.3479	0.6614	0.7207	0.697	0.4483	0.4401	0.4761	0.4295	0.4367	0.2507	0.1211	0.1834	0.1443	0.3233	0.1262	0.214	0.1531	0.1872	0.2093	0.1142	0.1812	0.1652	0.2522	0.1759	0.1704	0.3963	0.3521	0.1621	0.1326	0.2252	0	0.2192	0.2431
ECS-13-4	0.0918	0.8097	0.7711	0.6481	0.2123	0.1729	0.166	0.132	0.22	0.1842	0.259	0.5365	0.5982	0.2374	0.5678	0.1667	0.1651	0.5513	0.6143	0.5822	0.3648	0.3333	0.2821	0.3365	0.4317	0.0932	0.1586	0.1439	0.2383	0.1657	0.2892	0.1976	0.1265	0.0713	0.0846	0.1336	0.1751	0.1213	0.3408	0.3772	0.3618	0.3765	0.3424	0.1563	0.1353	0.1161	0.2192	0	0.131
ECS-13-5	0.1358	0.8507	0.8123	0.617	0.2357	0.1885	0.1724	0.154	0.2362	0.253	0.2844	0.4967	0.5504	0.1988	0.5295	0.1811	0.1537	0.5046	0.5781	0.5352	0.3281	0.2967	0.2812	0.3275	0.4956	0.167	0.1963	0.2005	0.2849	0.179	0.2525	0.2367	0.1881	0.1319	0.1148	0.1858	0.2312	0.1347	0.3646	0.3405	0.3698	0.3919	0.3583	0.2097	0.1679	0.1509	0.2431	0.131	0
UT62	0.0846	0.7505	0.7212	0.578	0.2688	0.2249	0.1052	0.1055	0.2709	0.1419	0.3187	0.5705	0.5991	0.2355	0.5598	0.1132	0.2239	0.5625	0.6098	0.5978	0.3088	0.3006	0.3365	0.2899	0.4017	0.1344	0.0986	0.0919	0.1806	0.1845	0.2283	0.1519	0.0986	0.0978	0.081	0.0849	0.1374	0.0681	0.2954	0.29	0.3009	0.4195	0.3612	0.1671	0.1035	0.1559	0.1716	0.1226	0.1558
Cross_Mtn	0.4239	0.4304	0.3825	0.4772	0.5887	0.5883	0.4721	0.429	0.626	0.4228	0.6742	0.7005	0.7423	0.5154	0.7115	0.33	0.5551	0.7261	0.7593	0.7454	0.6637	0.6649	0.7009	0.6543	0.2027	0.4669	0.3488	0.4393	0.3593	0.5378	0.3429	0.3131	0.3779	0.4575	0.4285	0.3788	0.2957	0.363	0.1838	0.292	0.3846	0.4571	0.4663	0.3137	0.3335	0.3878	0.3993	0.4345	0.4646
KY-19-PR7	0.4809	0.5165	0.4926	0.2835	0.7194	0.7001	0.5421	0.4543	0.7413	0.5304	0.786	0.8779	0.9065	0.6438	0.8784	0.4388	0.6633	0.893	0.9168	0.9122	0.7709	0.7732	0.8057	0.7661	0.3768	0.5572	0.4674	0.4913	0.4527	0.6456	0.4434	0.4664	0.4897	0.5138	0.5173	0.4459	0.437	0.4945	0.2698	0.2626	0.2399	0.5502	0.509	0.4464	0.4482	0.5251	0.3703	0.561	0.5531
B_Wescogame	0.0877	0.8207	0.7823	0.5778	0.2457	0.2286	0.2088	0.1409	0.2762	0.2106	0.3152	0.4567	0.5015	0.2188	0.4716	0.195	0.2043	0.4598	0.5281	0.4946	0.2945	0.2959	0.3312	0.2945	0.4656	0.1083	0.1875	0.159	0.2433	0.1986	0.2125	0.2233	0.1381	0.0794	0.0912	0.1322	0.2177	0.1558	0.3354	0.3005	0.3063	0.3977	0.3683	0.1909	0.1572	0.1247	0.2126	0.1067	0.09
Battle	0.6922	0.9411	0.9406	0.9406	0.8763	0.8095	0.7986	0.7129	0.8647	0.8119	0.9029	0.7442	0.6635	0.8398	0.8223	0.8196	0.7363	0.8634	0.8284	0.8653	0.893	0.9214	0.9018	0.9213	0.8474	0.6556	0.7604	0.7076	0.8159	0.8297	0.8116	0.6843	0.6887	0.6865	0.6948	0.7122	0.7307	0.7675	0.7334	0.7991	0.7821	0.3912	0.4537	0.6386	0.6875	0.6386	0.7525	0.6739	0.6607
07-CM-001	0.1193	0.7794	0.75	0.6449	0.2304	0.1865	0.1684	0.1393	0.2324	0.2191	0.2803	0.5128	0.5469	0.1984	0.5237	0.1955	0.1864	0.5096	0.5824	0.5406	0.3616	0.3301	0.2885	0.3614	0.4306	0.1113	0.1695	0.1784	0.2576	0.1589	0.286	0.216	0.1257	0.1058	0.1193	0.1475	0.1854	0.1237	0.3358	0.374	0.3586	0.3746	0.3445	0.1654	0.1696	0.1291	0.2485	0.0513	0.1365
07-BC-001	0.1466	0.6607	0.6227	0.4622	0.383	0.3488	0.2169	0.1417	0.3851	0.1928	0.433	0.5967	0.6252	0.3067	0.5895	0.1167	0.3271	0.5887	0.6481	0.6239	0.414	0.4152	0.4512	0.4045	0.4	0.187	0.1019	0.1787	0.1397	0.3084	0.1226	0.1933	0.1437	0.1662	0.1843	0.1055	0.1618	0.1289	0.1731	0.1805	0.2151	0.3938	0.3583	0.1347	0.1189	0.2118	0.1112	0.1967	0.23
07-BHU-001	0.1062	0.6904	0.6608	0.5155	0.3305	0.3052	0.1673	0.1148	0.3525	0.1534	0.4008	0.4992	0.5277	0.2542	0.4861	0.1567	0.2711	0.4957	0.5407	0.5264	0.3806	0.3818	0.4178	0.3714	0.4223	0.1465	0.1414	0.1456	0.2274	0.2462	0.1747	0.2084	0.1106	0.1311	0.132	0.1031	0.1932	0.1402	0.232	0.2445	0.2296	0.3962	0.3601	0.1746	0.0771	0.1167	0.1898	0.1422	0.1886
Quad1	0.1642	0.6559	0.6265	0.5403	0.3391	0.3048	0.2938	0.2204	0.3411	0.2976	0.389	0.4374	0.4659	0.3175	0.4188	0.2894	0.2875	0.432	0.4766	0.4646	0.3694	0.3846	0.3972	0.3752	0.3425	0.1682	0.2629	0.1997	0.3022	0.2836	0.2801	0.1669	0.1778	0.1662	0.1701	0.1807	0.2134	0.2458	0.2289	0.2608	0.2849	0.3288	0.2932	0.1764	0.186	0.1002	0.2457	0.1764	0.2091
Spray_Lakes	0.1322	0.7288	0.6994	0.5093	0.3416	0.3333	0.1913	0.1238	0.371	0.1986	0.4099	0.5076	0.5376	0.2659	0.5128	0.1995	0.3088	0.5029	0.5695	0.5348	0.403	0.3948	0.4307	0.3848	0.4293	0.1625	0.19	0.1264	0.211	0.2778	0.1936	0.1773	0.1128	0.1456	0.1533	0.1016	0.1599	0.1456	0.241	0.1752	0.227	0.4161	0.3806	0.1434	0.0885	0.1336	0.1715	0.202	0.1701
IB_D1	0.576	0.5611	0.5391	0.6094	0.7851	0.7595	0.6531	0.575	0.7872	0.6073	0.8312	0.8236	0.87	0.705	0.8351	0.5278	0.7501	0.8454	0.8722	0.8509	0.8271	0.8189	0.8549	0.8082	0.2855	0.6283	0.5443	0.608	0.5508	0.7066	0.5248	0.4938	0.5749	0.6054	0.5947	0.5348	0.4807	0.5475	0.3181	0.458	0.5031	0.6463	0.6262	0.4932	0.5413	0.549	0.5354	0.6224	0.6611
IB_D3	0.6088	0.3912	0.3585	0.4447	0.8251	0.8375	0.6711	0.5634	0.8742	0.6601	0.9132	0.9167	0.9533	0.7488	0.9398	0.5723	0.7827	0.9471	0.9691	0.9439	0.901	0.9022	0.9382	0.8916	0.3779	0.6486	0.5515	0.628	0.5792	0.765	0.5697	0.5557	0.6152	0.6412	0.6231	0.5652	0.533	0.5785	0.3401	0.4163	0.3885	0.6576	0.6287	0.5401	0.5628	0.607	0.4841	0.6652	0.6601
IB_D2	0.6101	0.4606	0.4464	0.5004	0.8254	0.7929	0.6694	0.5969	0.8204	0.645	0.8683	0.8598	0.8992	0.742	0.8754	0.5619	0.7798	0.8855	0.9085	0.8871	0.8525	0.8481	0.884	0.8412	0.3194	0.666	0.5819	0.6491	0.5849	0.7399	0.5552	0.5348	0.6086	0.6358	0.6357	0.5718	0.5182	0.5834	0.3418	0.4916	0.4574	0.6788	0.6609	0.5344	0.5748	0.5829	0.5328	0.656	0.695
IB_D4	0.5792	0.3615	0.3154	0.4366	0.8099	0.797	0.6425	0.5424	0.8347	0.6315	0.8829	0.9167	0.9452	0.7342	0.9398	0.5357	0.7639	0.9471	0.9691	0.9533	0.8724	0.8736	0.9096	0.863	0.3611	0.617	0.5471	0.5695	0.547	0.7465	0.5411	0.55	0.5866	0.6107	0.6087	0.5312	0.5165	0.5737	0.3401	0.3767	0.4356	0.6278	0.5949	0.5169	0.5354	0.5955	0.4599	0.6513	0.6285
FCB_D1	0.5238	0.4509	0.4293	0.3295	0.7644	0.7336	0.5757	0.4981	0.7746	0.5777	0.8228	0.8896	0.9182	0.6881	0.8823	0.4756	0.695	0.895	0.9214	0.9169	0.8116	0.8068	0.8394	0.7995	0.3727	0.5596	0.4983	0.5588	0.5008	0.6864	0.4841	0.4858	0.5265	0.5472	0.5624	0.4821	0.4544	0.5133	0.2759	0.3556	0.2867	0.5868	0.5597	0.4605	0.4969	0.5313	0.4077	0.5991	0.5977
FCB_D2	0.3105	0.5427	0.5133	0.3063	0.5376	0.5362	0.3714	0.2665	0.5804	0.3604	0.6216	0.7482	0.7768	0.4581	0.7317	0.2746	0.4884	0.7428	0.7838	0.779	0.6017	0.6019	0.6343	0.6017	0.3912	0.3749	0.2853	0.3193	0.2838	0.4708	0.2705	0.2912	0.3253	0.3466	0.3355	0.2709	0.2463	0.3	0.1156	0.1386	0.1873	0.4694	0.4026	0.2523	0.2661	0.3548	0.2185	0.3825	0.3674
FCB_D3	0.4936	0.3684	0.3485	0.4259	0.741	0.7087	0.55	0.4562	0.7529	0.548	0.7918	0.8486	0.8771	0.6581	0.8537	0.4435	0.6677	0.8635	0.8902	0.8758	0.7821	0.7811	0.817	0.7704	0.2751	0.531	0.4621	0.5085	0.4709	0.6569	0.451	0.4496	0.494	0.5191	0.5353	0.4457	0.4197	0.4803	0.2507	0.3364	0.3318	0.5455	0.5212	0.4282	0.4628	0.5059	0.3968	0.5627	0.5449
FCB_D4	0.5718	0.6298	0.635	0.673	0.7457	0.7077	0.6264	0.5794	0.7479	0.567	0.7957	0.8178	0.8463	0.6694	0.8219	0.4878	0.7001	0.8358	0.8588	0.8451	0.7799	0.7717	0.8077	0.7668	0.2482	0.6176	0.5219	0.5975	0.5184	0.6673	0.4956	0.447	0.5249	0.6077	0.5758	0.5542	0.446	0.5178	0.4345	0.4528	0.5387	0.6176	0.6284	0.4723	0.5126	0.5383	0.574	0.5947	0.6319
S4	0.2986	0.5195	0.4808	0.3565	0.5188	0.5124	0.3579	0.3028	0.5501	0.3568	0.5983	0.6378	0.6664	0.4498	0.6392	0.2511	0.4792	0.6538	0.6785	0.6651	0.5878	0.589	0.625	0.5784	0.3697	0.3435	0.2356	0.3158	0.2768	0.472	0.2631	0.2372	0.302	0.3307	0.3183	0.2512	0.2253	0.2644	0.106	0.1695	0.2594	0.3643	0.3314	0.2269	0.2602	0.2846	0.2842	0.3586	0.3538
S5	0.4461	0.4626	0.4239	0.5	0.6413	0.6195	0.4991	0.4394	0.6571	0.453	0.7053	0.7645	0.793	0.5548	0.7514	0.3605	0.5754	0.7575	0.8071	0.7918	0.6854	0.6961	0.7224	0.6854	0.2476	0.4711	0.3913	0.4665	0.3899	0.5682	0.3674	0.3442	0.409	0.4774	0.4486	0.3992	0.3268	0.3838	0.2342	0.3215	0.4149	0.4843	0.4791	0.3379	0.3656	0.4068	0.4196	0.4617	0.5013
S6	0.4484	0.4486	0.4579	0.5048	0.6435	0.6085	0.4987	0.4414	0.6441	0.4622	0.6919	0.7484	0.777	0.5657	0.7354	0.3631	0.5926	0.7549	0.7812	0.7757	0.6817	0.6735	0.7095	0.6628	0.3331	0.4705	0.3762	0.4672	0.3849	0.5674	0.3605	0.353	0.4233	0.4777	0.4505	0.4145	0.324	0.3904	0.2454	0.3218	0.4152	0.49	0.487	0.3488	0.3818	0.4128	0.4326	0.472	0.5096
S7	0.4314	0.359	0.3478	0.4156	0.6583	0.6241	0.4979	0.443	0.6604	0.4681	0.7084	0.728	0.7617	0.582	0.7218	0.3842	0.6024	0.7348	0.7786	0.7648	0.6981	0.6899	0.7259	0.6792	0.3695	0.4641	0.3915	0.4668	0.401	0.5837	0.3706	0.3619	0.4207	0.4536	0.4596	0.3835	0.3442	0.3979	0.1637	0.3034	0.3803	0.4982	0.4773	0.352	0.3942	0.4194	0.4039	0.47	0.5109
S8	0.4908	0.5165	0.4962	0.549	0.715	0.6903	0.5469	0.505	0.7378	0.5347	0.7768	0.7979	0.8264	0.6387	0.811	0.4409	0.6591	0.8235	0.8503	0.8251	0.7656	0.7669	0.8028	0.7562	0.3097	0.5258	0.4343	0.5301	0.4577	0.6404	0.4343	0.4186	0.4859	0.523	0.5196	0.4582	0.4009	0.4599	0.2749	0.364	0.4606	0.5578	0.5373	0.4087	0.4531	0.4761	0.495	0.5364	0.572
O_M source	0.4176	0.594	0.5645	0.3519	0.618	0.6379	0.4675	0.3854	0.6745	0.4512	0.7092	0.7995	0.8281	0.5505	0.8031	0.3783	0.5956	0.814	0.8394	0.8268	0.6769	0.6721	0.6981	0.6808	0.4916	0.4817	0.4035	0.4082	0.381	0.5427	0.3683	0.3967	0.4079	0.4427	0.4366	0.3849	0.3686	0.4206	0.1973	0.1946	0.1682	0.4743	0.3907	0.3704	0.3771	0.4491	0.3079	0.5021	0.4805
Central_App_Crys	0.4707	0.5149	0.4866	0.2877	0.706	0.6886	0.5276	0.4433	0.7303	0.5186	0.774	0.8733	0.9018	0.6256	0.8768	0.4284	0.6619	0.8903	0.914	0.9006	0.7549	0.7591	0.792	0.7503	0.3839	0.5522	0.4577	0.4731	0.4376	0.6285	0.4243	0.4651	0.4773	0.4975	0.5032	0.4361	0.4249	0.4779	0.2598	0.2539	0.2359	0.5465	0.4876	0.4309	0.4319	0.5191	0.364	0.5558	0.5427
N_Appalachian	0.4367	0.4858	0.4693	0.5273	0.6784	0.6408	0.5139	0.4464	0.6804	0.4824	0.7275	0.7771	0.8056	0.5996	0.7772	0.3916	0.6141	0.7901	0.8124	0.8043	0.7172	0.7148	0.7491	0.7067	0.1769	0.4787	0.3993	0.4749	0.4097	0.5978	0.3871	0.3694	0.4329	0.4717	0.4746	0.4104	0.3533	0.4043	0.2575	0.3135	0.4083	0.504	0.4856	0.3645	0.4092	0.4319	0.4447	0.4819	0.5135
NW_Arctic	0.2955	0.7735	0.7408	0.6318	0.4803	0.4272	0.4197	0.3426	0.465	0.4271	0.5181	0.377	0.3545	0.4519	0.4227	0.4259	0.3647	0.4672	0.4426	0.4702	0.5088	0.5313	0.5141	0.524	0.4656	0.2797	0.4041	0.3327	0.4306	0.4324	0.4231	0.2965	0.3011	0.2943	0.3007	0.3166	0.3442	0.374	0.344	0.4006	0.3987	0.3689	0.3395	0.2682	0.3156	0.2425	0.3683	0.2894	0.2716
NE_Arctic	0.1677	0.655	0.6252	0.4991	0.3424	0.3131	0.252	0.1968	0.3558	0.2542	0.4001	0.5009	0.5294	0.2702	0.492	0.243	0.2737	0.4929	0.5456	0.5297	0.3847	0.3866	0.421	0.3787	0.2952	0.1855	0.2445	0.1672	0.2347	0.2607	0.2375	0.1326	0.1223	0.1972	0.1553	0.1745	0.1662	0.1956	0.1964	0.2247	0.2304	0.3908	0.3525	0.1401	0.1366	0.1439	0.1823	0.1593	0.2137
Sonora	0.2974	0.9169	0.8872	0.7188	0.4291	0.4073	0.3674	0.3413	0.4133	0.3974	0.5005	0.3228	0.291	0.4002	0.3709	0.3737	0.311	0.4148	0.3927	0.4322	0.4554	0.4811	0.4643	0.4713	0.5487	0.3256	0.3849	0.3671	0.4588	0.3797	0.3819	0.3143	0.3485	0.2819	0.2999	0.3432	0.3604	0.3505	0.4762	0.4458	0.4854	0.2205	0.2227	0.3124	0.3331	0.2311	0.4263	0.3139	0.2709
kde like	AZShelf2	MS04	MS05	MS06	MC05	GS01	GS09	MC17	GS11	MC20	GS24	V18	V20	EC01	RC01	RC19	V10	V01	V22	V25	DMR01	LC01	SP01	CF02	HT02	HT14	HT04	HT20	HT24	KA03	MP-DZ2	DryCreek	Pedreg	5PS-42	5PS-58	5PS-82	1WM-302	1PL-534	KC-2	Z1	Z4	OK-1-VN	OK-2-V2	01PL12	04TD10	14TD10	ECS-13-2	ECS-13-4	ECS-13-5
AZShelf2	1	0.1692	0.1945	0.2442	0.4276	0.5775	0.7758	0.8002	0.3749	0.7505	0.2349	0.3817	0.359	0.5288	0.2986	0.7512	0.7222	0.2531	0.2521	0.2398	0.2692	0.2056	0.2551	0.254	0.5101	0.7533	0.7958	0.7591	0.7225	0.5429	0.5937	0.6549	0.7279	0.8973	0.8802	0.8812	0.7379	0.7831	0.6676	0.6801	0.6516	0.5293	0.5183	0.6858	0.826	0.7989	0.7655	0.8031	0.788
MS04	0.1692	1	0.802	0.7212	0.0526	0.0892	0.1174	0.1529	0.0469	0.1162	0.0184	0.0626	0.0223	0.1245	0.0331	0.1081	0.0493	0.014	0.0297	0.0353	0.0186	0.0089	0.0187	0.0091	0.0846	0.0987	0.1446	0.0972	0.1058	0.1152	0.1354	0.1001	0.0865	0.1691	0.1322	0.2057	0.0902	0.125	0.2716	0.1425	0.2274	0.1544	0.192	0.0911	0.162	0.1647	0.2142	0.1084	0.1236
MS05	0.1945	0.802	1	0.6706	0.0747	0.1144	0.1472	0.1799	0.0665	0.1461	0.038	0.0545	0.0326	0.1464	0.0239	0.1379	0.0777	0.0094	0.0241	0.0372	0.0381	0.0286	0.0382	0.0286	0.1057	0.1268	0.1694	0.1274	0.1358	0.1356	0.1695	0.1206	0.1165	0.1967	0.1551	0.2306	0.117	0.1442	0.3069	0.1708	0.2481	0.1855	0.2241	0.1169	0.1929	0.1842	0.2286	0.1357	0.1519
MS06	0.2442	0.7212	0.6706	1	0.2405	0.2786	0.2078	0.2185	0.2174	0.243	0.1943	0.0477	0.0449	0.2435	0.0313	0.186	0.1232	0.0142	0.0346	0.0426	0.1953	0.1832	0.1972	0.1903	0.1299	0.172	0.2035	0.1866	0.1977	0.2768	0.3	0.1473	0.1641	0.2509	0.2203	0.2597	0.1555	0.1721	0.2877	0.216	0.2876	0.2218	0.2676	0.1532	0.225	0.204	0.2965	0.1749	0.1934
MC05	0.4276	0.0526	0.0747	0.2405	1	0.728	0.4761	0.4135	0.6768	0.5351	0.5921	0.575	0.5496	0.7182	0.4447	0.4854	0.5022	0.4548	0.4643	0.4327	0.6037	0.6114	0.6753	0.5783	0.2494	0.3957	0.411	0.4167	0.4216	0.7192	0.6007	0.3812	0.3804	0.4304	0.4549	0.3925	0.3911	0.4668	0.2923	0.3469	0.2878	0.2831	0.2961	0.364	0.4088	0.3991	0.3612	0.4204	0.4561
GS01	0.5775	0.0892	0.1144	0.2786	0.728	1	0.5889	0.5387	0.6474	0.6322	0.5304	0.5049	0.4611	0.6848	0.3815	0.5716	0.6168	0.4029	0.3538	0.3931	0.4854	0.4551	0.5487	0.4666	0.336	0.5206	0.5478	0.5338	0.5225	0.7008	0.6254	0.4746	0.501	0.5747	0.5866	0.5512	0.5093	0.6021	0.4058	0.4359	0.3941	0.3783	0.3592	0.4629	0.5355	0.5383	0.507	0.5697	0.6244
GS09	0.7758	0.1174	0.1472	0.2078	0.4761	0.5889	1	0.8287	0.404	0.796	0.2764	0.3922	0.3778	0.5486	0.303	0.8162	0.7472	0.2778	0.277	0.271	0.3218	0.257	0.3082	0.2906	0.4801	0.7997	0.8215	0.8164	0.833	0.5415	0.5949	0.606	0.7356	0.7794	0.737	0.7645	0.7142	0.7584	0.5607	0.6739	0.6139	0.4446	0.4433	0.6766	0.7679	0.6859	0.6769	0.8307	0.757
MC17	0.8002	0.1529	0.1799	0.2185	0.4135	0.5387	0.8287	1	0.3556	0.742	0.2332	0.3479	0.3685	0.5009	0.2925	0.7566	0.7138	0.2516	0.2574	0.2487	0.2723	0.2079	0.2601	0.2427	0.5076	0.8175	0.8898	0.8216	0.7825	0.5048	0.5993	0.6297	0.7608	0.7957	0.7385	0.805	0.7462	0.738	0.6425	0.7347	0.7011	0.4957	0.4915	0.7079	0.8167	0.7489	0.6883	0.8366	0.7779
GS11	0.3749	0.0469	0.0665	0.2174	0.6768	0.6474	0.404	0.3556	1	0.4715	0.7116	0.488	0.4642	0.6814	0.3896	0.4144	0.4222	0.4687	0.4227	0.4519	0.5817	0.5559	0.6769	0.5641	0.2531	0.3806	0.3734	0.3735	0.3764	0.6722	0.537	0.3429	0.3558	0.3829	0.3857	0.3557	0.3536	0.4013	0.2528	0.3137	0.2722	0.214	0.2091	0.3451	0.3861	0.3778	0.3196	0.3885	0.3899
MC20	0.7505	0.1162	0.1461	0.243	0.5351	0.6322	0.796	0.742	0.4715	1	0.3368	0.3661	0.3433	0.5964	0.3046	0.8118	0.7082	0.2747	0.2621	0.2605	0.3893	0.3184	0.3739	0.3763	0.4947	0.7513	0.7918	0.763	0.7909	0.6175	0.651	0.6254	0.7207	0.7454	0.7483	0.718	0.743	0.7621	0.5747	0.6477	0.5626	0.4529	0.4493	0.6712	0.7676	0.7011	0.6483	0.7814	0.6869
GS24	0.2349	0.0184	0.038	0.1943	0.5921	0.5304	0.2764	0.2332	0.7116	0.3368	1	0.404	0.3671	0.5218	0.3085	0.2835	0.2924	0.4801	0.4065	0.477	0.6147	0.6334	0.6835	0.5486	0.1571	0.2372	0.241	0.2502	0.2607	0.542	0.4612	0.1984	0.2346	0.2455	0.2422	0.2205	0.2387	0.2698	0.1619	0.2091	0.1662	0.1621	0.1567	0.2213	0.2435	0.2303	0.1964	0.2491	0.2671
V18	0.3817	0.0626	0.0545	0.0477	0.575	0.5049	0.3922	0.3479	0.488	0.3661	0.404	1	0.7073	0.6156	0.5934	0.4192	0.4788	0.5839	0.6271	0.5703	0.2995	0.332	0.3777	0.2948	0.2263	0.3482	0.3723	0.3125	0.3013	0.474	0.3872	0.3734	0.3102	0.3861	0.393	0.3501	0.3372	0.4278	0.289	0.256	0.2279	0.1911	0.1441	0.3435	0.352	0.3976	0.2961	0.3739	0.4238
V20	0.359	0.0223	0.0326	0.0449	0.5496	0.4611	0.3778	0.3685	0.4642	0.3433	0.3671	0.7073	1	0.5962	0.6428	0.3926	0.4937	0.4839	0.6225	0.4735	0.3344	0.3671	0.4118	0.3214	0.205	0.3464	0.3577	0.314	0.2804	0.4854	0.3534	0.3529	0.2973	0.3844	0.3591	0.3239	0.3201	0.3747	0.2881	0.2358	0.2169	0.2054	0.1496	0.3381	0.3448	0.3787	0.2619	0.37	0.4033
EC01	0.5288	0.1245	0.1464	0.2435	0.7182	0.6848	0.5486	0.5009	0.6814	0.5964	0.5218	0.6156	0.5962	1	0.5068	0.5428	0.5397	0.5004	0.5219	0.4908	0.4537	0.4571	0.5402	0.4258	0.3101	0.4744	0.5018	0.4878	0.4863	0.7447	0.5637	0.4532	0.4463	0.5395	0.5503	0.4828	0.4509	0.5238	0.3976	0.4358	0.3747	0.3589	0.3672	0.4364	0.5178	0.5018	0.4479	0.4988	0.5284
RC01	0.2986	0.0331	0.0239	0.0313	0.4447	0.3815	0.303	0.2925	0.3896	0.3046	0.3085	0.5934	0.6428	0.5068	1	0.345	0.3792	0.4733	0.6908	0.4302	0.2745	0.3297	0.3698	0.2951	0.1904	0.2858	0.2987	0.2645	0.2513	0.4579	0.3231	0.2904	0.2607	0.3129	0.2997	0.2717	0.2875	0.3332	0.2347	0.2196	0.2	0.164	0.1193	0.2912	0.2874	0.3133	0.2269	0.3024	0.3191
RC19	0.7512	0.1081	0.1379	0.186	0.4854	0.5716	0.8162	0.7566	0.4144	0.8118	0.2835	0.4192	0.3926	0.5428	0.345	1	0.7453	0.3062	0.2875	0.2842	0.3452	0.2797	0.3144	0.3138	0.5772	0.7953	0.8056	0.7541	0.7791	0.5503	0.61	0.6347	0.7433	0.7537	0.7166	0.7327	0.8052	0.816	0.5915	0.6949	0.5947	0.438	0.4003	0.7857	0.7808	0.7181	0.6379	0.8014	0.7282
V10	0.7222	0.0493	0.0777	0.1232	0.5022	0.6168	0.7472	0.7138	0.4222	0.7082	0.2924	0.4788	0.4937	0.5397	0.3792	0.7453	1	0.3435	0.34	0.3187	0.3397	0.2833	0.3242	0.2981	0.4302	0.7218	0.7412	0.7065	0.6619	0.5263	0.5305	0.6229	0.6842	0.7347	0.6937	0.6938	0.7045	0.7442	0.5104	0.5254	0.4609	0.4257	0.3767	0.629	0.6955	0.679	0.5789	0.8129	0.7289
V01	0.2531	0.014	0.0094	0.0142	0.4548	0.4029	0.2778	0.2516	0.4687	0.2747	0.4801	0.5839	0.4839	0.5004	0.4733	0.3062	0.3435	1	0.6178	0.8015	0.2495	0.2779	0.3427	0.224	0.1546	0.2541	0.2689	0.2341	0.2312	0.4005	0.3167	0.2532	0.2301	0.2591	0.2587	0.2363	0.2566	0.3156	0.1834	0.185	0.1603	0.1179	0.0807	0.2477	0.2393	0.2794	0.1965	0.2702	0.2836
V22	0.2521	0.0297	0.0241	0.0346	0.4643	0.3538	0.277	0.2574	0.4227	0.2621	0.4065	0.6271	0.6225	0.5219	0.6908	0.2875	0.34	0.6178	1	0.5842	0.2996	0.3375	0.3686	0.2844	0.1233	0.23	0.2588	0.2089	0.1924	0.401	0.2836	0.2691	0.1968	0.2708	0.2557	0.2237	0.2185	0.2702	0.1939	0.1622	0.142	0.1112	0.099	0.2292	0.2394	0.2669	0.1773	0.254	0.2686
V25	0.2398	0.0353	0.0372	0.0426	0.4327	0.3931	0.271	0.2487	0.4519	0.2605	0.477	0.5703	0.4735	0.4908	0.4302	0.2842	0.3187	0.8015	0.5842	1	0.2164	0.2396	0.2991	0.1851	0.129	0.2343	0.251	0.2151	0.2054	0.3673	0.2971	0.2413	0.2013	0.2437	0.2459	0.2278	0.2292	0.3002	0.1841	0.1613	0.143	0.1257	0.1011	0.2237	0.2275	0.2587	0.1929	0.2538	0.2919
DMR01	0.2692	0.0186	0.0381	0.1953	0.6037	0.4854	0.3218	0.2723	0.5817	0.3893	0.6147	0.2995	0.3344	0.4537	0.2745	0.3452	0.3397	0.2495	0.2996	0.2164	1	0.7588	0.7996	0.8361	0.157	0.2624	0.271	0.2719	0.2796	0.5359	0.4427	0.2428	0.247	0.2909	0.2791	0.2418	0.2608	0.2807	0.1738	0.2201	0.1743	0.1447	0.1637	0.2522	0.2753	0.2502	0.2092	0.2731	0.2675
LC01	0.2056	0.0089	0.0286	0.1832	0.6114	0.4551	0.257	0.2079	0.5559	0.3184	0.6334	0.332	0.3671	0.4571	0.3297	0.2797	0.2833	0.2779	0.3375	0.2396	0.7588	1	0.8023	0.7191	0.1069	0.1973	0.2078	0.2052	0.2136	0.5394	0.4313	0.1947	0.1831	0.2278	0.2124	0.1802	0.1972	0.2269	0.117	0.1614	0.1218	0.1015	0.1119	0.1864	0.2076	0.197	0.1536	0.21	0.2095
SP01	0.2551	0.0187	0.0382	0.1972	0.6753	0.5487	0.3082	0.2601	0.6769	0.3739	0.6835	0.3777	0.4118	0.5402	0.3698	0.3144	0.3242	0.3427	0.3686	0.2991	0.7996	0.8023	1	0.7343	0.1616	0.254	0.2537	0.266	0.2724	0.6411	0.471	0.2347	0.2415	0.2742	0.2657	0.23	0.245	0.2736	0.1636	0.2185	0.1803	0.1461	0.1618	0.2371	0.2628	0.2464	0.2028	0.2616	0.2604
CF02	0.254	0.0091	0.0286	0.1903	0.5783	0.4666	0.2906	0.2427	0.5641	0.3763	0.5486	0.2948	0.3214	0.4258	0.2951	0.3138	0.2981	0.224	0.2844	0.1851	0.8361	0.7191	0.7343	1	0.1426	0.2388	0.2461	0.249	0.2611	0.4955	0.403	0.229	0.2256	0.2772	0.2647	0.2246	0.2405	0.243	0.1482	0.2007	0.156	0.1263	0.1368	0.2285	0.2519	0.2166	0.2016	0.2472	0.2222
HT02	0.5101	0.0846	0.1057	0.1299	0.2494	0.336	0.4801	0.5076	0.2531	0.4947	0.1571	0.2263	0.205	0.3101	0.1904	0.5772	0.4302	0.1546	0.1233	0.129	0.157	0.1069	0.1616	0.1426	1	0.5867	0.5566	0.5796	0.6114	0.3602	0.4477	0.4886	0.6562	0.4763	0.4911	0.5155	0.7025	0.5769	0.5178	0.7008	0.5939	0.3732	0.3488	0.689	0.5882	0.5537	0.468	0.5506	0.4762
HT14	0.7533	0.0987	0.1268	0.172	0.3957	0.5206	0.7997	0.8175	0.3806	0.7513	0.2372	0.3482	0.3464	0.4744	0.2858	0.7953	0.7218	0.2541	0.23	0.2343	0.2624	0.1973	0.254	0.2388	0.5867	1	0.8423	0.8627	0.8337	0.496	0.5609	0.6081	0.8133	0.7341	0.7068	0.7615	0.8026	0.7446	0.6074	0.7132	0.6634	0.462	0.4238	0.8254	0.8049	0.7406	0.6543	0.8573	0.7665
HT04	0.7958	0.1446	0.1694	0.2035	0.411	0.5478	0.8215	0.8898	0.3734	0.7918	0.241	0.3723	0.3577	0.5018	0.2987	0.8056	0.7412	0.2689	0.2588	0.251	0.271	0.2078	0.2537	0.2461	0.5566	0.8423	1	0.8272	0.8153	0.5189	0.6351	0.6601	0.789	0.7874	0.7523	0.8162	0.811	0.7965	0.6906	0.7535	0.6954	0.499	0.4725	0.7405	0.8404	0.781	0.7127	0.8722	0.7707
HT20	0.7591	0.0972	0.1274	0.1866	0.4167	0.5338	0.8164	0.8216	0.3735	0.763	0.2502	0.3125	0.314	0.4878	0.2645	0.7541	0.7065	0.2341	0.2089	0.2151	0.2719	0.2052	0.266	0.249	0.5796	0.8627	0.8272	1	0.9002	0.5129	0.5839	0.599	0.876	0.7398	0.7286	0.7568	0.8314	0.7195	0.5985	0.7635	0.6696	0.5028	0.4945	0.7525	0.8217	0.7073	0.6644	0.858	0.7402
HT24	0.7225	0.1058	0.1358	0.1977	0.4216	0.5225	0.833	0.7825	0.3764	0.7909	0.2607	0.3013	0.2804	0.4863	0.2513	0.7791	0.6619	0.2312	0.1924	0.2054	0.2796	0.2136	0.2724	0.2611	0.6114	0.8337	0.8153	0.9002	1	0.5092	0.591	0.5825	0.8613	0.7099	0.7012	0.7346	0.8154	0.7252	0.5898	0.7951	0.6719	0.4637	0.4581	0.7461	0.7866	0.6615	0.6626	0.8121	0.6945
KA03	0.5429	0.1152	0.1356	0.2768	0.7192	0.7008	0.5415	0.5048	0.6722	0.6175	0.542	0.474	0.4854	0.7447	0.4579	0.5503	0.5263	0.4005	0.401	0.3673	0.5359	0.5394	0.6411	0.4955	0.3602	0.496	0.5189	0.5129	0.5092	1	0.6349	0.4662	0.4855	0.5478	0.5576	0.5004	0.4896	0.5429	0.4249	0.4715	0.4062	0.3589	0.3654	0.474	0.5534	0.5177	0.4815	0.5223	0.5321
MP-DZ2	0.5937	0.1354	0.1695	0.3	0.6007	0.6254	0.5949	0.5993	0.537	0.651	0.4612	0.3872	0.3534	0.5637	0.3231	0.61	0.5305	0.3167	0.2836	0.2971	0.4427	0.4313	0.471	0.403	0.4477	0.5609	0.6351	0.5839	0.591	0.6349	1	0.5001	0.5641	0.5898	0.5828	0.5814	0.5823	0.6306	0.5391	0.5728	0.5255	0.4188	0.4198	0.5389	0.602	0.5981	0.5454	0.5917	0.5844
DryCreek	0.6549	0.1001	0.1206	0.1473	0.3812	0.4746	0.606	0.6297	0.3429	0.6254	0.1984	0.3734	0.3529	0.4532	0.2904	0.6347	0.6229	0.2532	0.2691	0.2413	0.2428	0.1947	0.2347	0.229	0.4886	0.6081	0.6601	0.599	0.5825	0.4662	0.5001	1	0.5977	0.6828	0.6467	0.6346	0.6463	0.6425	0.585	0.5464	0.4913	0.4066	0.3874	0.6067	0.6645	0.6975	0.581	0.6541	0.6105
Pedreg	0.7279	0.0865	0.1165	0.1641	0.3804	0.501	0.7356	0.7608	0.3558	0.7207	0.2346	0.3102	0.2973	0.4463	0.2607	0.7433	0.6842	0.2301	0.1968	0.2013	0.247	0.1831	0.2415	0.2256	0.6562	0.8133	0.789	0.876	0.8613	0.4855	0.5641	0.5977	1	0.6938	0.7057	0.7302	0.8667	0.7167	0.6112	0.7875	0.6621	0.4964	0.4706	0.786	0.8109	0.7073	0.6392	0.8213	0.7041
5PS-42	0.8973	0.1691	0.1967	0.2509	0.4304	0.5747	0.7794	0.7957	0.3829	0.7454	0.2455	0.3861	0.3844	0.5395	0.3129	0.7537	0.7347	0.2591	0.2708	0.2437	0.2909	0.2278	0.2742	0.2772	0.4763	0.7341	0.7874	0.7398	0.7099	0.5478	0.5898	0.6828	0.6938	1	0.8081	0.8414	0.7075	0.7409	0.6429	0.6396	0.6138	0.5135	0.5093	0.6602	0.8018	0.7664	0.7461	0.7872	0.7651
5PS-58	0.8802	0.1322	0.1551	0.2203	0.4549	0.5866	0.737	0.7385	0.3857	0.7483	0.2422	0.393	0.3591	0.5503	0.2997	0.7166	0.6937	0.2587	0.2557	0.2459	0.2791	0.2124	0.2657	0.2647	0.4911	0.7068	0.7523	0.7286	0.7012	0.5576	0.5828	0.6467	0.7057	0.8081	1	0.7887	0.7123	0.7676	0.6255	0.6635	0.5917	0.5129	0.4965	0.6606	0.7688	0.761	0.7251	0.7597	0.7641
5PS-82	0.8812	0.2057	0.2306	0.2597	0.3925	0.5512	0.7645	0.805	0.3557	0.718	0.2205	0.3501	0.3239	0.4828	0.2717	0.7327	0.6938	0.2363	0.2237	0.2278	0.2418	0.1802	0.23	0.2246	0.5155	0.7615	0.8162	0.7568	0.7346	0.5004	0.5814	0.6346	0.7302	0.8414	0.7887	1	0.7344	0.7817	0.7053	0.6824	0.7079	0.5276	0.5295	0.6862	0.8329	0.792	0.778	0.8101	0.7747
1WM-302	0.7379	0.0902	0.117	0.1555	0.3911	0.5093	0.7142	0.7462	0.3536	0.743	0.2387	0.3372	0.3201	0.4509	0.2875	0.8052	0.7045	0.2566	0.2185	0.2292	0.2608	0.1972	0.245	0.2405	0.7025	0.8026	0.811	0.8314	0.8154	0.4896	0.5823	0.6463	0.8667	0.7075	0.7123	0.7344	1	0.7853	0.6325	0.7697	0.6136	0.4685	0.4275	0.8497	0.8141	0.7353	0.6356	0.8268	0.6935
1PL-534	0.7831	0.125	0.1442	0.1721	0.4668	0.6021	0.7584	0.738	0.4013	0.7621	0.2698	0.4278	0.3747	0.5238	0.3332	0.816	0.7442	0.3156	0.2702	0.3002	0.2807	0.2269	0.2736	0.243	0.5769	0.7446	0.7965	0.7195	0.7252	0.5429	0.6306	0.6425	0.7167	0.7409	0.7676	0.7817	0.7853	1	0.6368	0.705	0.6249	0.461	0.441	0.7322	0.7656	0.779	0.6958	0.7905	0.8031
KC-2	0.6676	0.2716	0.3069	0.2877	0.2923	0.4058	0.5607	0.6425	0.2528	0.5747	0.1619	0.289	0.2881	0.3976	0.2347	0.5915	0.5104	0.1834	0.1939	0.1841	0.1738	0.117	0.1636	0.1482	0.5178	0.6074	0.6906	0.5985	0.5898	0.4249	0.5391	0.585	0.6112	0.6429	0.6255	0.7053	0.6325	0.6368	1	0.6595	0.6887	0.5191	0.4979	0.633	0.7146	0.6932	0.6691	0.6212	0.6206
Z1	0.6801	0.1425	0.1708	0.216	0.3469	0.4359	0.6739	0.7347	0.3137	0.6477	0.2091	0.256	0.2358	0.4358	0.2196	0.6949	0.5254	0.185	0.1622	0.1613	0.2201	0.1614	0.2185	0.2007	0.7008	0.7132	0.7535	0.7635	0.7951	0.4715	0.5728	0.5464	0.7875	0.6396	0.6635	0.6824	0.7697	0.705	0.6595	1	0.7935	0.5003	0.5024	0.7611	0.7528	0.6601	0.6655	0.6799	0.6497
Z4	0.6516	0.2274	0.2481	0.2876	0.2878	0.3941	0.6139	0.7011	0.2722	0.5626	0.1662	0.2279	0.2169	0.3747	0.2	0.5947	0.4609	0.1603	0.142	0.143	0.1743	0.1218	0.1803	0.156	0.5939	0.6634	0.6954	0.6696	0.6719	0.4062	0.5255	0.4913	0.6621	0.6138	0.5917	0.7079	0.6136	0.6249	0.6887	0.7935	1	0.4817	0.493	0.6501	0.6893	0.6414	0.7115	0.6159	0.6103
OK-1-VN	0.5293	0.1544	0.1855	0.2218	0.2831	0.3783	0.4446	0.4957	0.214	0.4529	0.1621	0.1911	0.2054	0.3589	0.164	0.438	0.4257	0.1179	0.1112	0.1257	0.1447	0.1015	0.1461	0.1263	0.3732	0.462	0.499	0.5028	0.4637	0.3589	0.4188	0.4066	0.4964	0.5135	0.5129	0.5276	0.4685	0.461	0.5191	0.5003	0.4817	1	0.8202	0.4321	0.5364	0.5346	0.5257	0.5006	0.52
OK-2-V2	0.5183	0.192	0.2241	0.2676	0.2961	0.3592	0.4433	0.4915	0.2091	0.4493	0.1567	0.1441	0.1496	0.3672	0.1193	0.4003	0.3767	0.0807	0.099	0.1011	0.1637	0.1119	0.1618	0.1368	0.3488	0.4238	0.4725	0.4945	0.4581	0.3654	0.4198	0.3874	0.4706	0.5093	0.4965	0.5295	0.4275	0.441	0.4979	0.5024	0.493	0.8202	1	0.3781	0.5124	0.504	0.5202	0.4645	0.4887
01PL12	0.6858	0.0911	0.1169	0.1532	0.364	0.4629	0.6766	0.7079	0.3451	0.6712	0.2213	0.3435	0.3381	0.4364	0.2912	0.7857	0.629	0.2477	0.2292	0.2237	0.2522	0.1864	0.2371	0.2285	0.689	0.8254	0.7405	0.7525	0.7461	0.474	0.5389	0.6067	0.786	0.6602	0.6606	0.6862	0.8497	0.7322	0.633	0.7611	0.6501	0.4321	0.3781	1	0.7798	0.7202	0.5952	0.7551	0.7026
04TD10	0.826	0.162	0.1929	0.225	0.4088	0.5355	0.7679	0.8167	0.3861	0.7676	0.2435	0.352	0.3448	0.5178	0.2874	0.7808	0.6955	0.2393	0.2394	0.2275	0.2753	0.2076	0.2628	0.2519	0.5882	0.8049	0.8404	0.8217	0.7866	0.5534	0.602	0.6645	0.8109	0.8018	0.7688	0.8329	0.8141	0.7656	0.7146	0.7528	0.6893	0.5364	0.5124	0.7798	1	0.8043	0.7059	0.8358	0.7502
14TD10	0.7989	0.1647	0.1842	0.204	0.3991	0.5383	0.6859	0.7489	0.3778	0.7011	0.2303	0.3976	0.3787	0.5018	0.3133	0.7181	0.679	0.2794	0.2669	0.2587	0.2502	0.197	0.2464	0.2166	0.5537	0.7406	0.781	0.7073	0.6615	0.5177	0.5981	0.6975	0.7073	0.7664	0.761	0.792	0.7353	0.779	0.6932	0.6601	0.6414	0.5346	0.504	0.7202	0.8043	1	0.6899	0.7921	0.7601
ECS-13-2	0.7655	0.2142	0.2286	0.2965	0.3612	0.507	0.6769	0.6883	0.3196	0.6483	0.1964	0.2961	0.2619	0.4479	0.2269	0.6379	0.5789	0.1965	0.1773	0.1929	0.2092	0.1536	0.2028	0.2016	0.468	0.6543	0.7127	0.6644	0.6626	0.4815	0.5454	0.581	0.6392	0.7461	0.7251	0.778	0.6356	0.6958	0.6691	0.6655	0.7115	0.5257	0.5202	0.5952	0.7059	0.6899	1	0.6772	0.6859
ECS-13-4	0.8031	0.1084	0.1357	0.1749	0.4204	0.5697	0.8307	0.8366	0.3885	0.7814	0.2491	0.3739	0.37	0.4988	0.3024	0.8014	0.8129	0.2702	0.254	0.2538	0.2731	0.21	0.2616	0.2472	0.5506	0.8573	0.8722	0.858	0.8121	0.5223	0.5917	0.6541	0.8213	0.7872	0.7597	0.8101	0.8268	0.7905	0.6212	0.6799	0.6159	0.5006	0.4645	0.7551	0.8358	0.7921	0.6772	1	0.7921
ECS-13-5	0.788	0.1236	0.1519	0.1934	0.4561	0.6244	0.757	0.7779	0.3899	0.6869	0.2671	0.4238	0.4033	0.5284	0.3191	0.7282	0.7289	0.2836	0.2686	0.2919	0.2675	0.2095	0.2604	0.2222	0.4762	0.7665	0.7707	0.7402	0.6945	0.5321	0.5844	0.6105	0.7041	0.7651	0.7641	0.7747	0.6935	0.8031	0.6206	0.6497	0.6103	0.52	0.4887	0.7026	0.7502	0.7601	0.6859	0.7921	1
UT62	0.7966	0.1063	0.1338	0.1766	0.4453	0.5716	0.8361	0.8029	0.3942	0.8198	0.2618	0.3972	0.3727	0.5179	0.316	0.8517	0.7884	0.2861	0.2701	0.2662	0.2962	0.2326	0.277	0.2694	0.5713	0.8468	0.8925	0.8292	0.8175	0.5394	0.6208	0.6697	0.8136	0.78	0.7647	0.7892	0.8522	0.8353	0.6562	0.7204	0.6158	0.4901	0.4556	0.7675	0.8348	0.7851	0.6975	0.8982	0.7749
Cross_Mtn	0.5854	0.2407	0.2876	0.2578	0.3032	0.3745	0.4902	0.5667	0.2723	0.5416	0.1826	0.2256	0.2051	0.4011	0.1842	0.5178	0.457	0.1611	0.1678	0.1704	0.1888	0.143	0.1875	0.1659	0.5147	0.5154	0.6011	0.5542	0.5554	0.4132	0.5113	0.6272	0.5721	0.546	0.568	0.626	0.6016	0.5635	0.7735	0.6072	0.575	0.4732	0.4933	0.5492	0.6548	0.6311	0.5867	0.5581	0.5218
KY-19-PR7	0.5177	0.3127	0.3527	0.3921	0.2273	0.3051	0.4846	0.5475	0.228	0.4726	0.1386	0.112	0.095	0.343	0.0959	0.4856	0.3443	0.0682	0.0658	0.079	0.133	0.0957	0.1354	0.1247	0.4228	0.4855	0.5499	0.5113	0.5355	0.3365	0.4438	0.3652	0.493	0.4945	0.4694	0.565	0.4613	0.4761	0.6513	0.6431	0.7434	0.4317	0.4709	0.4533	0.548	0.4569	0.6232	0.46	0.4675
B_Wescogame	0.7703	0.1223	0.1481	0.1883	0.3854	0.5138	0.7983	0.8638	0.3517	0.7032	0.2215	0.3484	0.3578	0.472	0.2854	0.7422	0.6695	0.2448	0.2422	0.2334	0.248	0.1847	0.2411	0.2214	0.582	0.8797	0.837	0.8479	0.7838	0.4911	0.5778	0.6128	0.8016	0.7419	0.7228	0.776	0.7783	0.7388	0.6307	0.7462	0.7075	0.4986	0.4749	0.794	0.8153	0.7526	0.6711	0.8314	0.7749
Battle	0.2926	0.0567	0.0579	0.045	0.1034	0.1636	0.2211	0.2782	0.1128	0.1951	0.0513	0.2194	0.308	0.1647	0.1657	0.2199	0.2676	0.0921	0.1155	0.1099	0.0608	0.0275	0.0605	0.0404	0.2342	0.3244	0.2501	0.2681	0.204	0.1894	0.1841	0.249	0.272	0.2906	0.284	0.2773	0.252	0.2264	0.269	0.2231	0.2315	0.2918	0.2701	0.3301	0.3055	0.3488	0.2363	0.2963	0.326
07-CM-001	0.7897	0.1283	0.1502	0.1792	0.3964	0.5672	0.8029	0.7996	0.3645	0.7538	0.2285	0.3909	0.3675	0.4789	0.304	0.7611	0.7579	0.2692	0.2639	0.2531	0.2521	0.1934	0.2402	0.2276	0.5359	0.7913	0.8644	0.7931	0.7692	0.5047	0.5977	0.6502	0.7704	0.7679	0.7623	0.814	0.7879	0.7894	0.6429	0.6807	0.6185	0.5146	0.4765	0.7089	0.8055	0.8067	0.6921	0.9007	0.7874
07-BC-001	0.7943	0.1937	0.2194	0.2423	0.3586	0.5002	0.7132	0.8114	0.3474	0.7051	0.2142	0.3202	0.309	0.462	0.2658	0.7182	0.6473	0.234	0.2122	0.216	0.2298	0.1716	0.2245	0.2096	0.5792	0.7697	0.8565	0.79	0.7622	0.4913	0.611	0.6565	0.7853	0.7763	0.7265	0.845	0.7886	0.7667	0.744	0.7529	0.7598	0.5222	0.5165	0.7242	0.8438	0.8015	0.736	0.8035	0.7197
07-BHU-001	0.7939	0.1946	0.2163	0.2385	0.3684	0.5037	0.7165	0.8113	0.3505	0.676	0.2112	0.3698	0.3531	0.4729	0.2935	0.6886	0.6342	0.2554	0.2586	0.2357	0.2385	0.1806	0.2322	0.2135	0.5711	0.7437	0.8258	0.7529	0.7078	0.4992	0.6136	0.645	0.7415	0.7674	0.7334	0.8377	0.7266	0.7395	0.7222	0.7263	0.7657	0.5221	0.5078	0.7101	0.824	0.8066	0.7121	0.788	0.7261
Quad1	0.7154	0.165	0.1748	0.1888	0.3013	0.435	0.5821	0.679	0.2952	0.5795	0.1695	0.3264	0.3091	0.4089	0.2718	0.6118	0.5535	0.2235	0.2126	0.207	0.1875	0.136	0.1845	0.1672	0.5674	0.7036	0.6991	0.6699	0.6213	0.4422	0.545	0.6605	0.6769	0.6821	0.6673	0.719	0.6928	0.6655	0.7281	0.67	0.6371	0.5231	0.4917	0.7422	0.7667	0.8213	0.6447	0.7099	0.6761
Spray_Lakes	0.7744	0.1634	0.191	0.2344	0.3862	0.4739	0.7174	0.8	0.356	0.6735	0.2241	0.3321	0.3398	0.4911	0.2781	0.7057	0.5983	0.2259	0.2275	0.221	0.2558	0.1901	0.2467	0.2254	0.5953	0.8122	0.7793	0.7667	0.7355	0.5119	0.5885	0.6	0.7422	0.746	0.7042	0.7624	0.7139	0.7107	0.7171	0.792	0.7482	0.5283	0.502	0.788	0.8208	0.7694	0.7085	0.7399	0.759
IB_D1	0.3943	0.249	0.2791	0.2575	0.128	0.1752	0.3082	0.3621	0.1507	0.3339	0.0714	0.1147	0.0779	0.2213	0.09	0.4127	0.2048	0.0684	0.0512	0.0577	0.0741	0.0488	0.0734	0.0609	0.4655	0.367	0.4013	0.3393	0.3807	0.2375	0.3714	0.3474	0.3666	0.3652	0.3616	0.4358	0.4131	0.4106	0.5869	0.4941	0.5477	0.298	0.3159	0.4395	0.4393	0.4335	0.4376	0.335	0.2987
IB_D3	0.4013	0.3022	0.3497	0.342	0.1675	0.1922	0.3585	0.4085	0.1425	0.3691	0.0851	0.0831	0.0525	0.2593	0.0534	0.3717	0.2262	0.0353	0.0307	0.0494	0.0841	0.0575	0.0775	0.0628	0.3504	0.3605	0.4285	0.3715	0.4065	0.2533	0.3827	0.4059	0.3631	0.3762	0.3727	0.4434	0.3675	0.3971	0.6377	0.5172	0.6099	0.3492	0.3833	0.3801	0.4417	0.3989	0.5287	0.3348	0.3461
IB_D2	0.3789	0.3241	0.3386	0.3676	0.1226	0.1882	0.2899	0.3512	0.1399	0.3369	0.0663	0.0976	0.0726	0.2332	0.0883	0.3821	0.2032	0.0538	0.0366	0.0591	0.0641	0.0376	0.0633	0.0538	0.4032	0.3271	0.3953	0.3202	0.3538	0.2458	0.3656	0.3571	0.3462	0.3535	0.3478	0.4211	0.3914	0.3985	0.5986	0.4678	0.5292	0.3024	0.3251	0.3917	0.4173	0.4052	0.4703	0.3186	0.2977
IB_D4	0.4166	0.3444	0.4255	0.3521	0.1856	0.2194	0.3708	0.4187	0.1597	0.3595	0.0913	0.0831	0.0537	0.2785	0.0456	0.3751	0.243	0.0269	0.0307	0.0458	0.1006	0.0654	0.0872	0.0869	0.323	0.3634	0.4235	0.3833	0.408	0.2768	0.353	0.3627	0.3622	0.3978	0.3858	0.4596	0.3574	0.3896	0.6108	0.5067	0.5429	0.3739	0.4212	0.3692	0.4426	0.3849	0.5155	0.3403	0.3737
FCB_D1	0.4644	0.3477	0.4024	0.4063	0.1856	0.2521	0.4248	0.4844	0.1889	0.4107	0.1176	0.1063	0.0819	0.2883	0.0865	0.4265	0.2901	0.06	0.055	0.0652	0.1007	0.069	0.1017	0.0931	0.4028	0.4299	0.502	0.4305	0.4595	0.2807	0.4235	0.3351	0.424	0.4462	0.4063	0.5235	0.412	0.4447	0.6199	0.5532	0.6754	0.3887	0.4294	0.4092	0.4818	0.4267	0.5746	0.4121	0.3984
FCB_D2	0.6837	0.2875	0.3383	0.339	0.3461	0.4454	0.6278	0.6893	0.3019	0.6141	0.203	0.2485	0.222	0.4432	0.211	0.5975	0.5081	0.1831	0.1661	0.1752	0.2094	0.1542	0.2068	0.1889	0.4863	0.6253	0.702	0.6505	0.6612	0.4573	0.5613	0.5323	0.6374	0.6627	0.6333	0.7344	0.6114	0.6288	0.7983	0.7055	0.7341	0.5123	0.5321	0.5848	0.7141	0.6312	0.7288	0.6222	0.6342
FCB_D3	0.5106	0.3139	0.3631	0.3642	0.2185	0.2846	0.4568	0.5203	0.2136	0.462	0.1278	0.1346	0.1171	0.3283	0.1113	0.4771	0.3315	0.0784	0.0661	0.0867	0.12	0.0802	0.1239	0.1089	0.4687	0.4781	0.5447	0.4747	0.5074	0.3389	0.4586	0.4483	0.4831	0.4832	0.4674	0.5571	0.4899	0.5076	0.7338	0.6136	0.6786	0.4348	0.4671	0.4948	0.5526	0.4967	0.6122	0.4525	0.4503
FCB_D4	0.3987	0.1655	0.1832	0.1746	0.1687	0.2368	0.3443	0.3812	0.1897	0.3824	0.0957	0.141	0.1075	0.2616	0.1148	0.459	0.2624	0.083	0.0735	0.0806	0.1158	0.0846	0.1034	0.1154	0.5109	0.3974	0.4225	0.3806	0.4199	0.2892	0.3623	0.4327	0.4182	0.363	0.3721	0.4207	0.4706	0.4452	0.4914	0.5205	0.4831	0.319	0.3189	0.4957	0.4722	0.4461	0.3927	0.3792	0.3357
S4	0.6369	0.1893	0.2195	0.2232	0.3022	0.3773	0.5649	0.6451	0.2655	0.557	0.1704	0.2143	0.2177	0.3723	0.2085	0.6365	0.4717	0.1557	0.1407	0.1554	0.1964	0.1443	0.1861	0.1798	0.6238	0.6045	0.6531	0.6372	0.6288	0.4041	0.5363	0.5393	0.652	0.6001	0.5898	0.6796	0.6543	0.6479	0.6944	0.729	0.719	0.5152	0.5334	0.6257	0.6772	0.6532	0.6202	0.609	0.5723
S5	0.5565	0.2027	0.2289	0.2247	0.2476	0.3312	0.4617	0.5299	0.2331	0.5185	0.1497	0.1799	0.1582	0.3326	0.1716	0.5932	0.4145	0.1405	0.1129	0.1187	0.1552	0.1164	0.1496	0.1466	0.6354	0.5297	0.574	0.5337	0.551	0.3694	0.4687	0.5137	0.5693	0.5257	0.5189	0.606	0.637	0.6037	0.6838	0.6673	0.6353	0.4474	0.4615	0.6248	0.628	0.6159	0.5543	0.533	0.4762
S6	0.5654	0.1829	0.2045	0.2121	0.2406	0.336	0.4816	0.561	0.2281	0.515	0.1376	0.1877	0.1752	0.3267	0.1799	0.5858	0.3996	0.1315	0.115	0.1301	0.1643	0.1223	0.1497	0.1593	0.6548	0.5152	0.5993	0.5332	0.5538	0.3589	0.5109	0.5093	0.5674	0.5338	0.526	0.6005	0.6103	0.6055	0.6483	0.6684	0.6393	0.4391	0.4461	0.5777	0.6067	0.5868	0.5586	0.532	0.4815
S7	0.5473	0.2663	0.2876	0.2752	0.2337	0.3201	0.4811	0.5686	0.2072	0.4781	0.1224	0.2145	0.1816	0.3055	0.1961	0.562	0.3655	0.1494	0.1335	0.1406	0.1459	0.1037	0.1418	0.1363	0.5732	0.5053	0.5808	0.5159	0.5364	0.3273	0.4928	0.4398	0.5361	0.5202	0.4955	0.6042	0.5602	0.5581	0.7167	0.6523	0.6959	0.3991	0.4241	0.5516	0.5573	0.5434	0.5728	0.5003	0.4649
S8	0.4874	0.1919	0.2223	0.2202	0.1829	0.2498	0.4338	0.5002	0.1882	0.425	0.1016	0.1366	0.1166	0.2769	0.1105	0.528	0.3087	0.0824	0.0669	0.0743	0.1161	0.0856	0.1025	0.1114	0.6527	0.4893	0.5491	0.4875	0.5297	0.294	0.4693	0.4262	0.518	0.4538	0.4451	0.5354	0.5605	0.5265	0.6148	0.6647	0.6196	0.3911	0.4091	0.5648	0.5514	0.5212	0.51	0.4593	0.407
O_M source	0.4726	0.3587	0.4217	0.4341	0.2713	0.3274	0.4181	0.4626	0.203	0.4099	0.1473	0.0986	0.1041	0.3598	0.0695	0.3665	0.2933	0.042	0.0676	0.0718	0.164	0.1331	0.1745	0.1458	0.2922	0.3804	0.4409	0.4327	0.4178	0.3622	0.3994	0.2796	0.3952	0.4612	0.4411	0.5021	0.3518	0.3809	0.5649	0.4768	0.5541	0.4771	0.5887	0.3285	0.4604	0.4151	0.5647	0.3882	0.4348
Central_App_Crys	0.5217	0.3005	0.3624	0.3715	0.2293	0.3077	0.5058	0.5617	0.2267	0.4551	0.1354	0.1148	0.0978	0.334	0.0901	0.4626	0.3311	0.0637	0.0635	0.0745	0.1381	0.0955	0.1387	0.1306	0.4005	0.4732	0.5449	0.5249	0.5399	0.3358	0.4339	0.3506	0.4846	0.4988	0.4729	0.5664	0.438	0.4436	0.6387	0.6163	0.7328	0.4283	0.4777	0.424	0.5337	0.433	0.6194	0.4552	0.4561
N_Appalachian	0.5282	0.197	0.2302	0.2302	0.2245	0.3094	0.4517	0.5198	0.2011	0.4727	0.1214	0.1827	0.1591	0.3122	0.1539	0.5072	0.3549	0.111	0.1127	0.1141	0.1251	0.086	0.1329	0.1168	0.5377	0.4794	0.562	0.4891	0.5093	0.3432	0.4665	0.5441	0.5144	0.493	0.4941	0.5604	0.5452	0.5547	0.6889	0.6187	0.6161	0.4133	0.4305	0.5333	0.5783	0.5394	0.543	0.486	0.465
NW_Arctic	0.5894	0.0721	0.0935	0.127	0.2697	0.3902	0.5055	0.5541	0.2705	0.5129	0.1618	0.3096	0.349	0.3551	0.2449	0.5561	0.5314	0.1797	0.2007	0.1829	0.1781	0.1185	0.173	0.1535	0.5998	0.6655	0.5785	0.6045	0.5559	0.3949	0.4481	0.5664	0.644	0.5593	0.5858	0.5709	0.6375	0.5734	0.6357	0.5919	0.5317	0.4419	0.3858	0.7209	0.6524	0.6612	0.5274	0.6208	0.5998
NE_Arctic	0.6952	0.1186	0.1385	0.1638	0.3462	0.4563	0.5969	0.6609	0.3113	0.6342	0.1908	0.299	0.3032	0.4199	0.2645	0.702	0.5724	0.2129	0.1833	0.1981	0.2166	0.1559	0.2018	0.1952	0.6339	0.7312	0.68	0.693	0.6693	0.466	0.5393	0.6168	0.7162	0.6521	0.6674	0.6848	0.7592	0.7095	0.6903	0.7044	0.6289	0.4984	0.4474	0.7977	0.7445	0.7278	0.619	0.7094	0.6825
Sonora	0.6206	0.0845	0.115	0.207	0.4776	0.5705	0.6189	0.6168	0.3895	0.6019	0.3158	0.3898	0.4629	0.5354	0.3215	0.5984	0.6378	0.2768	0.3009	0.2905	0.3534	0.2942	0.3319	0.3065	0.3753	0.5892	0.5906	0.5937	0.5319	0.5206	0.5614	0.5354	0.5618	0.6375	0.6131	0.5814	0.5591	0.5822	0.4924	0.4761	0.4272	0.5823	0.5714	0.547	0.6157	0.6466	0.5159	0.6367	0.6454
[truncated: 29 more columns]

## Sheet: 3-Wolfcampian
pdp_x	AZShelf3	MS07	OC2-8	OC56	HC01	SM01	TP01	JBO1	11CVC	11CT	2QZ-9	SY-C	SY-B	1PS-4	1WM-478	1WM-520	12-02-16-1	12-03-16-1	12-03-16-3	10-11-15-1	12-03-16-2	09-CM-676	OK-10-PO1	OK-4-WL	03PL12	UT1	Washington	Greene	WV-1-PR	Upper_Hermit	Lower_Hermit	Esplanade	Hermit	06GC156	06GC155	Santa_Terresa	Mima_Mexico	Kindle	O_M source	Central_App_Crys	N_Appalachian	NW_Arctic	NE_Arctic	Sonora
AZShelf3	1	0.5298	0.3642	0.5676	0.0204	0.1347	0.0253	0.0312	0.0507	0.0721	0.8286	0.8732	0.8319	0.8541	0.8346	0.8798	0.2915	0.3883	0.3264	0.2548	0.2484	0.4025	0.0003841	0.3349	0.6183	0.6412	0.2921	0.2458	0.3566	0.3004	0.7241	0.7693	0.667	0.7768	0.8455	0.8066	0.2223	0.6404	0.2521	0.3053	0.232	0.2366	0.5616	0.3662
MS07	0.5298	1	0.3988	0.3923	0.00018463	0.0017	0.0049	0.0015	0.0078	0.0101	0.4183	0.4739	0.5149	0.3478	0.4186	0.4307	0.4516	0.3686	0.5363	0.4742	0.385	0.2613	0.0005317	0.6172	0.3164	0.5429	0.5068	0.3791	0.5975	0.3561	0.4461	0.3514	0.4269	0.3008	0.4356	0.4247	0.1763	0.3519	0.4378	0.4877	0.5804	0.1623	0.3695	0.0984
OC2-8	0.3642	0.3988	1	0.4101	0.0028	0.0162	0.00081131	0.001	0.0049	0.0091	0.3908	0.2663	0.4271	0.2287	0.2219	0.2995	0.3692	0.3501	0.2867	0.1656	0.2352	0.2784	0.00014799	0.3141	0.3246	0.3169	0.2433	0.1224	0.1939	0.2299	0.2111	0.2455	0.3233	0.1839	0.1976	0.3079	0.0745	0.3182	0.0791	0.1885	0.4657	0.0954	0.2323	0.0353
OC56	0.5676	0.3923	0.4101	1	0.0116	0.0345	0.00028566	0.00091668	0.0013	0.0022	0.5431	0.3811	0.4707	0.4288	0.4295	0.5641	0.2351	0.3347	0.4106	0.2474	0.2845	0.3026	0.0031	0.457	0.3669	0.503	0.334	0.1914	0.3252	0.3332	0.5598	0.3709	0.4171	0.4626	0.4704	0.4848	0.0788	0.2888	0.2138	0.3396	0.2367	0.1147	0.4001	0.1222
HC01	0.0204	0.00018463	0.0028	0.0116	1	0.2879	0.0889	0.0972	0.1181	0.1206	0.0428	0.0092	0.0089	0.0088	0.0048	0.0176	0.00066419	0.0242	0.00019048	0.00094009	2.3875e-05	0.0365	0.5631	0.0317	0.0167	0.0029	0.00028884	0.00042446	8.0571e-05	0.0389	0.0054	0.0155	0.0672	0.015	0.0036	0.0276	0.1018	0.0212	5.3e-05	1.5865e-05	0.0023	0.0038	0.0753	0.0314
SM01	0.1347	0.0017	0.0162	0.0345	0.2879	1	0.5322	0.6612	0.6443	0.6202	0.1269	0.1132	0.1088	0.1055	0.0893	0.1226	0.0028	0.0765	0.00081537	0.0081	0.00064412	0.0451	0.0122	0.0025	0.0556	0.0518	0.00058004	0.0075	0.00068542	0.0161	0.0255	0.1651	0.1722	0.1803	0.0765	0.2338	0.2628	0.1902	0.0135	0.0062	0.00062738	0.0153	0.0566	0.2437
TP01	0.0253	0.0049	0.00081131	0.00028566	0.0889	0.5322	1	0.9111	0.8333	0.7281	0.0311	0.0381	0.044	0.0023	0.0133	0.0029	0.0024	0.0758	0.00078937	0.0069	0.0014	0.0098	0.00025594	0.00071524	0.00016157	0.0019	0.0047	0.025	0.0026	0.0101	0.0003657	0.0365	0.0316	0.026	0.0077	0.0943	0.4084	0.1432	0.0346	0.0194	0.0005028	0.002	0.0068	0.072
JBO1	0.0312	0.0015	0.001	0.00091668	0.0972	0.6612	0.9111	1	0.7087	0.5867	0.0354	0.0358	0.0414	0.0067	0.0211	0.0094	0.00032889	0.0661	0.00040369	0.0099	0.0023	0.008	0.00029169	0.00026397	0.00087025	0.0061	0.0019	0.0191	0.0012	0.0099	0.00013947	0.0509	0.041	0.0476	0.012	0.1189	0.3139	0.1369	0.0338	0.014	0.00038432	0.0035	0.0095	0.0982
11CVC	0.0507	0.0078	0.0049	0.0013	0.1181	0.6443	0.8333	0.7087	1	0.9423	0.0512	0.0644	0.0715	0.0144	0.0299	0.0234	0.0085	0.0952	0.00047398	0.0055	0.00094061	0.0137	0.00033129	0.0017	0.0049	0.0108	0.0063	0.0213	0.0038	0.0139	0.00060833	0.064	0.0618	0.0589	0.0211	0.1263	0.4163	0.1533	0.0246	0.0181	0.00056978	0.0042	0.0143	0.1184
11CT	0.0721	0.0101	0.0091	0.0022	0.1206	0.6202	0.7281	0.5867	0.9423	1	0.0727	0.0945	0.1044	0.0253	0.0365	0.0395	0.0147	0.0833	0.0012	0.0043	8.1174e-05	0.0234	0.0004098	0.002	0.0133	0.0147	0.0073	0.0188	0.0039	0.0171	0.0013	0.0779	0.0752	0.0728	0.0291	0.132	0.4565	0.1806	0.0227	0.0179	0.00076023	0.0065	0.0206	0.1368
2QZ-9	0.8286	0.4183	0.3908	0.5431	0.0428	0.1269	0.0311	0.0354	0.0512	0.0727	1	0.6359	0.7903	0.5978	0.6776	0.8128	0.2362	0.4119	0.2428	0.1685	0.2098	0.3664	0.0021	0.2578	0.4888	0.413	0.181	0.1036	0.1887	0.3049	0.5097	0.4696	0.5443	0.5236	0.6269	0.6216	0.171	0.5695	0.1107	0.1559	0.2336	0.114	0.4359	0.2034
SY-C	0.8732	0.4739	0.2663	0.3811	0.0092	0.1132	0.0381	0.0358	0.0644	0.0945	0.6359	1	0.6972	0.7624	0.6992	0.7474	0.2833	0.2738	0.2894	0.2032	0.1808	0.2912	0.0046	0.2368	0.5041	0.4986	0.2025	0.2029	0.2868	0.1674	0.5223	0.7111	0.508	0.6648	0.7421	0.6573	0.2369	0.5905	0.2569	0.2632	0.2245	0.272	0.4981	0.362
SY-B	0.8319	0.5149	0.4271	0.4707	0.0089	0.1088	0.044	0.0414	0.0715	0.1044	0.7903	0.6972	1	0.5623	0.612	0.7269	0.2994	0.4122	0.2908	0.2061	0.2623	0.3704	0.0027	0.2953	0.4637	0.5193	0.275	0.1932	0.2992	0.3599	0.4868	0.5195	0.4926	0.5324	0.5748	0.6041	0.2222	0.5945	0.19	0.2563	0.2649	0.1621	0.4294	0.2018
1PS-4	0.8541	0.3478	0.2287	0.4288	0.0088	0.1055	0.0023	0.0067	0.0144	0.0253	0.5978	0.7624	0.5623	1	0.77	0.7706	0.1611	0.2314	0.222	0.1613	0.1342	0.3036	0.0026	0.2068	0.5568	0.5453	0.184	0.1917	0.2626	0.13	0.6629	0.695	0.5054	0.6955	0.8159	0.7178	0.114	0.4647	0.1765	0.2318	0.0974	0.1677	0.4099	0.3826
1WM-478	0.8346	0.4186	0.2219	0.4295	0.0048	0.0893	0.0133	0.0211	0.0299	0.0365	0.6776	0.6992	0.612	0.77	1	0.7427	0.1795	0.3241	0.1927	0.2203	0.1493	0.2844	0.003	0.1988	0.563	0.4929	0.1982	0.1974	0.2518	0.1966	0.7147	0.6764	0.5075	0.7304	0.786	0.7714	0.1504	0.5205	0.1691	0.191	0.1139	0.2	0.4405	0.4032
1WM-520	0.8798	0.4307	0.2995	0.5641	0.0176	0.1226	0.0029	0.0094	0.0234	0.0395	0.8128	0.7474	0.7269	0.7706	0.7427	1	0.2318	0.3604	0.2904	0.1931	0.2044	0.3419	6.0353e-05	0.2478	0.5219	0.5522	0.1904	0.116	0.2169	0.241	0.6045	0.6077	0.5282	0.6589	0.7736	0.6535	0.1168	0.538	0.1363	0.1673	0.1871	0.193	0.5067	0.2954
12-02-16-1	0.2915	0.4516	0.3692	0.2351	0.00066419	0.0028	0.0024	0.00032889	0.0085	0.0147	0.2362	0.2833	0.2994	0.1611	0.1795	0.2318	1	0.2695	0.3642	0.1708	0.4425	0.1646	0.00093551	0.3027	0.2363	0.2104	0.3184	0.1586	0.2584	0.2186	0.1539	0.2499	0.2778	0.1941	0.1878	0.2017	0.0632	0.304	0.138	0.2257	0.5187	0.1621	0.2564	0.0353
12-03-16-1	0.3883	0.3686	0.3501	0.3347	0.0242	0.0765	0.0758	0.0661	0.0952	0.0833	0.4119	0.2738	0.4122	0.2314	0.3241	0.3604	0.2695	1	0.229	0.2404	0.286	0.3329	0.0089	0.2752	0.262	0.2621	0.2166	0.0891	0.1753	0.3534	0.2855	0.251	0.3269	0.1901	0.2566	0.356	0.1405	0.3474	0.1065	0.1239	0.2197	0.0767	0.2893	0.0572
12-03-16-3	0.3264	0.5363	0.2867	0.4106	0.00019048	0.00081537	0.00078937	0.00040369	0.00047398	0.0012	0.2428	0.2894	0.2908	0.222	0.1927	0.2904	0.3642	0.229	1	0.2779	0.4872	0.1996	0.0013	0.4972	0.183	0.3836	0.4257	0.2684	0.438	0.2629	0.3097	0.2129	0.2395	0.2266	0.2682	0.2569	0.0805	0.2248	0.3229	0.4808	0.4215	0.1083	0.2381	0.0277
10-11-15-1	0.2548	0.4742	0.1656	0.2474	0.00094009	0.0081	0.0069	0.0099	0.0055	0.0043	0.1685	0.2032	0.2061	0.1613	0.2203	0.1931	0.1708	0.2404	0.2779	1	0.1327	0.1662	0.0015	0.3948	0.1387	0.3727	0.2855	0.2501	0.3679	0.2291	0.2953	0.2182	0.2497	0.189	0.2289	0.2601	0.1811	0.1471	0.2738	0.2779	0.1961	0.1445	0.2064	0.0881
12-03-16-2	0.2484	0.385	0.2352	0.2845	2.3875e-05	0.00064412	0.0014	0.0023	0.00094061	8.1174e-05	0.2098	0.1808	0.2623	0.1342	0.1493	0.2044	0.4425	0.286	0.4872	0.1327	1	0.147	0.00054068	0.3268	0.1781	0.2459	0.3521	0.1627	0.301	0.2988	0.2141	0.1742	0.2039	0.1673	0.1837	0.1603	0.0301	0.2415	0.1714	0.2732	0.366	0.097	0.2483	0.0142
09-CM-676	0.4025	0.2613	0.2784	0.3026	0.0365	0.0451	0.0098	0.008	0.0137	0.0234	0.3664	0.2912	0.3704	0.3036	0.2844	0.3419	0.1646	0.3329	0.1996	0.1662	0.147	1	0.0365	0.3046	0.2617	0.2861	0.1289	0.0595	0.1146	0.4076	0.2853	0.2702	0.367	0.1989	0.2578	0.3467	0.2426	0.2337	0.0665	0.0929	0.1353	0.1188	0.3446	0.1187
OK-10-PO1	0.0003841	0.0005317	0.00014799	0.0031	0.5631	0.0122	0.00025594	0.00029169	0.00033129	0.0004098	0.0021	0.0046	0.0027	0.0026	0.003	6.0353e-05	0.00093551	0.0089	0.0013	0.0015	0.00054068	0.0365	1	0.0408	5.7071e-05	0.0026	0.00030265	0.00040125	0.00042883	0.036	0.0011	0.0039	0.0041	0.0047	0.0038	0.0014	0.0054	0.0016	0.0018	0.0012	0.002	0.00021998	0.0679	0.0032
OK-4-WL	0.3349	0.6172	0.3141	0.457	0.0317	0.0025	0.00071524	0.00026397	0.0017	0.002	0.2578	0.2368	0.2953	0.2068	0.1988	0.2478	0.3027	0.2752	0.4972	0.3948	0.3268	0.3046	0.0408	1	0.2191	0.4956	0.5758	0.4845	0.6689	0.4984	0.3782	0.2084	0.3201	0.2037	0.2512	0.3182	0.1773	0.172	0.4776	0.6415	0.4248	0.0862	0.3654	0.0304
03PL12	0.6183	0.3164	0.3246	0.3669	0.0167	0.0556	0.00016157	0.00087025	0.0049	0.0133	0.4888	0.5041	0.4637	0.5568	0.563	0.5219	0.2363	0.262	0.183	0.1387	0.1781	0.2617	5.7071e-05	0.2191	1	0.4295	0.207	0.1863	0.2428	0.161	0.4633	0.5588	0.5306	0.4873	0.5415	0.5463	0.0598	0.4185	0.1483	0.1679	0.202	0.1272	0.3188	0.198
UT1	0.6412	0.5429	0.3169	0.503	0.0029	0.0518	0.0019	0.0061	0.0108	0.0147	0.413	0.4986	0.5193	0.5453	0.4929	0.5522	0.2104	0.2621	0.3836	0.3727	0.2459	0.2861	0.0026	0.4956	0.4295	1	0.5136	0.4561	0.5861	0.3262	0.6285	0.5608	0.437	0.5535	0.6308	0.6024	0.1785	0.3802	0.449	0.5074	0.2549	0.1753	0.3891	0.2109
Washington	0.2921	0.5068	0.2433	0.334	0.00028884	0.00058004	0.0047	0.0019	0.0063	0.0073	0.181	0.2025	0.275	0.184	0.1982	0.1904	0.3184	0.2166	0.4257	0.2855	0.3521	0.1289	0.00030265	0.5758	0.207	0.5136	1	0.7574	0.7627	0.3023	0.3272	0.2389	0.2497	0.2369	0.2967	0.3018	0.1096	0.2176	0.5225	0.7551	0.3104	0.0428	0.195	0.0118
Greene	0.2458	0.3791	0.1224	0.1914	0.00042446	0.0075	0.025	0.0191	0.0213	0.0188	0.1036	0.2029	0.1932	0.1917	0.1974	0.116	0.1586	0.0891	0.2684	0.2501	0.1627	0.0595	0.00040125	0.4845	0.1863	0.4561	0.7574	1	0.8381	0.1345	0.3056	0.2572	0.1799	0.2532	0.3102	0.3383	0.1636	0.165	0.6787	0.8541	0.1369	0.0175	0.1174	0.0393
WV-1-PR	0.3566	0.5975	0.1939	0.3252	8.0571e-05	0.00068542	0.0026	0.0012	0.0038	0.0039	0.1887	0.2868	0.2992	0.2626	0.2518	0.2169	0.2584	0.1753	0.438	0.3679	0.301	0.1146	0.00042883	0.6689	0.2428	0.5861	0.7627	0.8381	1	0.261	0.4322	0.288	0.2872	0.2944	0.3969	0.4065	0.1276	0.1842	0.791	0.8993	0.2481	0.0346	0.1904	0.0379
Upper_Hermit	0.3004	0.3561	0.2299	0.3332	0.0389	0.0161	0.0101	0.0099	0.0139	0.0171	0.3049	0.1674	0.3599	0.13	0.1966	0.241	0.2186	0.3534	0.2629	0.2291	0.2988	0.4076	0.036	0.4984	0.161	0.3262	0.3023	0.1345	0.261	1	0.219	0.1318	0.2583	0.1547	0.1489	0.2422	0.1955	0.176	0.1719	0.2187	0.2411	0.1184	0.4509	0.0349
Lower_Hermit	0.7241	0.4461	0.2111	0.5598	0.0054	0.0255	0.0003657	0.00013947	0.00060833	0.0013	0.5097	0.5223	0.4868	0.6629	0.7147	0.6045	0.1539	0.2855	0.3097	0.2953	0.2141	0.2853	0.0011	0.3782	0.4633	0.6285	0.3272	0.3056	0.4322	0.219	1	0.6205	0.5103	0.6744	0.7292	0.6651	0.1171	0.3618	0.3027	0.3502	0.1189	0.1528	0.4012	0.2962
Esplanade	0.7693	0.3514	0.2455	0.3709	0.0155	0.1651	0.0365	0.0509	0.064	0.0779	0.4696	0.7111	0.5195	0.695	0.6764	0.6077	0.2499	0.251	0.2129	0.2182	0.1742	0.2702	0.0039	0.2084	0.5588	0.5608	0.2389	0.2572	0.288	0.1318	0.6205	1	0.5783	0.7846	0.7166	0.6567	0.2107	0.5997	0.2142	0.2384	0.1649	0.3626	0.49	0.4922
Hermit	0.667	0.4269	0.3233	0.4171	0.0672	0.1722	0.0316	0.041	0.0618	0.0752	0.5443	0.508	0.4926	0.5054	0.5075	0.5282	0.2778	0.3269	0.2395	0.2497	0.2039	0.367	0.0041	0.3201	0.5306	0.437	0.2497	0.1799	0.2872	0.2583	0.5103	0.5783	1	0.5321	0.4972	0.6197	0.1858	0.4175	0.1988	0.2113	0.2548	0.2064	0.4658	0.2557
06GC156	0.7768	0.3008	0.1839	0.4626	0.015	0.1803	0.026	0.0476	0.0589	0.0728	0.5236	0.6648	0.5324	0.6955	0.7304	0.6589	0.1941	0.1901	0.2266	0.189	0.1673	0.1989	0.0047	0.2037	0.4873	0.5535	0.2369	0.2532	0.2944	0.1547	0.6744	0.7846	0.5321	1	0.7149	0.7207	0.1853	0.5337	0.2073	0.2799	0.098	0.3204	0.4684	0.4872
06GC155	0.8455	0.4356	0.1976	0.4704	0.0036	0.0765	0.0077	0.012	0.0211	0.0291	0.6269	0.7421	0.5748	0.8159	0.786	0.7736	0.1878	0.2566	0.2682	0.2289	0.1837	0.2578	0.0038	0.2512	0.5415	0.6308	0.2967	0.3102	0.3969	0.1489	0.7292	0.7166	0.4972	0.7149	1	0.7355	0.1153	0.4635	0.3185	0.3266	0.1239	0.1347	0.3824	0.3175
Santa_Terresa	0.8066	0.4247	0.3079	0.4848	0.0276	0.2338	0.0943	0.1189	0.1263	0.132	0.6216	0.6573	0.6041	0.7178	0.7714	0.6535	0.2017	0.356	0.2569	0.2601	0.1603	0.3467	0.0014	0.3182	0.5463	0.6024	0.3018	0.3383	0.4065	0.2422	0.6651	0.6567	0.6197	0.7207	0.7355	1	0.267	0.5495	0.342	0.3558	0.1422	0.1391	0.3847	0.3523
Mima_Mexico	0.2223	0.1763	0.0745	0.0788	0.1018	0.2628	0.4084	0.3139	0.4163	0.4565	0.171	0.2369	0.2222	0.114	0.1504	0.1168	0.0632	0.1405	0.0805	0.1811	0.0301	0.2426	0.0054	0.1773	0.0598	0.1785	0.1096	0.1636	0.1276	0.1955	0.1171	0.2107	0.1858	0.1853	0.1153	0.267	1	0.294	0.1811	0.1661	0.0297	0.1569	0.2327	0.3371
Kindle	0.6404	0.3519	0.3182	0.2888	0.0212	0.1902	0.1432	0.1369	0.1533	0.1806	0.5695	0.5905	0.5945	0.4647	0.5205	0.538	0.304	0.3474	0.2248	0.1471	0.2415	0.2337	0.0016	0.172	0.4185	0.3802	0.2176	0.165	0.1842	0.176	0.3618	0.5997	0.4175	0.5337	0.4635	0.5495	0.294	1	0.1209	0.171	0.2672	0.3252	0.4644	0.314
O_M source	0.2521	0.4378	0.0791	0.2138	5.3e-05	0.0135	0.0346	0.0338	0.0246	0.0227	0.1107	0.2569	0.19	0.1765	0.1691	0.1363	0.138	0.1065	0.3229	0.2738	0.1714	0.0665	0.0018	0.4776	0.1483	0.449	0.5225	0.6787	0.791	0.1719	0.3027	0.2142	0.1988	0.2073	0.3185	0.342	0.1811	0.1209	1	0.7307	0.1343	0.0182	0.1256	0.0745
Central_App_Crys	0.3053	0.4877	0.1885	0.3396	1.5865e-05	0.0062	0.0194	0.014	0.0181	0.0179	0.1559	0.2632	0.2563	0.2318	0.191	0.1673	0.2257	0.1239	0.4808	0.2779	0.2732	0.0929	0.0012	0.6415	0.1679	0.5074	0.7551	0.8541	0.8993	0.2187	0.3502	0.2384	0.2113	0.2799	0.3266	0.3558	0.1661	0.171	0.7307	1	0.238	0.0284	0.1578	0.0371
N_Appalachian	0.232	0.5804	0.4657	0.2367	0.0023	0.00062738	0.0005028	0.00038432	0.00056978	0.00076023	0.2336	0.2245	0.2649	0.0974	0.1139	0.1871	0.5187	0.2197	0.4215	0.1961	0.366	0.1353	0.002	0.4248	0.202	0.2549	0.3104	0.1369	0.2481	0.2411	0.1189	0.1649	0.2548	0.098	0.1239	0.1422	0.0297	0.2672	0.1343	0.238	1	0.1411	0.2396	0.0037
NW_Arctic	0.2366	0.1623	0.0954	0.1147	0.0038	0.0153	0.002	0.0035	0.0042	0.0065	0.114	0.272	0.1621	0.1677	0.2	0.193	0.1621	0.0767	0.1083	0.1445	0.097	0.1188	0.00021998	0.0862	0.1272	0.1753	0.0428	0.0175	0.0346	0.1184	0.1528	0.3626	0.2064	0.3204	0.1347	0.1391	0.1569	0.3252	0.0182	0.0284	0.1411	1	0.5671	0.2745
NE_Arctic	0.5616	0.3695	0.2323	0.4001	0.0753	0.0566	0.0068	0.0095	0.0143	0.0206	0.4359	0.4981	0.4294	0.4099	0.4405	0.5067	0.2564	0.2893	0.2381	0.2064	0.2483	0.3446	0.0679	0.3654	0.3188	0.3891	0.195	0.1174	0.1904	0.4509	0.4012	0.49	0.4658	0.4684	0.3824	0.3847	0.2327	0.4644	0.1256	0.1578	0.2396	0.5671	1	0.2617
Sonora	0.3662	0.0984	0.0353	0.1222	0.0314	0.2437	0.072	0.0982	0.1184	0.1368	0.2034	0.362	0.2018	0.3826	0.4032	0.2954	0.0353	0.0572	0.0277	0.0881	0.0142	0.1187	0.0032	0.0304	0.198	0.2109	0.0118	0.0393	0.0379	0.0349	0.2962	0.4922	0.2557	0.4872	0.3175	0.3523	0.3371	0.314	0.0745	0.0371	0.0037	0.2745	0.2617	1
KS	AZShelf3	MS07	OC2-8	OC56	HC01	SM01	TP01	JBO1	11CVC	11CT	2QZ-9	SY-C	SY-B	1PS-4	1WM-478	1WM-520	12-02-16-1	12-03-16-1	12-03-16-3	10-11-15-1	12-03-16-2		OK-10-PO1	OK-4-WL	03PL12	UT1	Washington	Greene	WV-1-PR	Upper_Hermit	Lower_Hermit	Esplanade	Hermit	06GC156	06GC155	Santa_Terresa	Mima_Mexico	Kindle	O_M source	Central_App_Crys	N_Appalachian	NW_Arctic	NE_Arctic	Sonora
AZShelf3	0	0.2204	0.2594	0.1789	0.439	0.347	0.4584	0.4338	0.4095	0.4264	0.1109	0.0983	0.1033	0.1021	0.0798	0.0573	0.2838	0.2893	0.2932	0.2178	0.3352	0.2	0.9093	0.3372	0.1143	0.1648	0.4439	0.4876	0.4349	0.2989	0.1102	0.1314	0.1316	0.0987	0.1127	0.0827	0.1428	0.085	0.3559	0.4078	0.3617	0.3273	0.1456	0.3434
MS07	0.2204	0	0.1828	0.1255	0.3832	0.5515	0.6373	0.6373	0.6075	0.6168	0.195	0.3164	0.1853	0.3066	0.2718	0.2513	0.1487	0.2043	0.1262	0.0983	0.1702	0.1275	0.8529	0.1379	0.179	0.138	0.2527	0.301	0.2431	0.2027	0.2023	0.3152	0.1741	0.2908	0.2708	0.219	0.2665	0.2526	0.2187	0.2315	0.2349	0.3946	0.2328	0.4857
OC2-8	0.2594	0.1828	0	0.1417	0.2621	0.5726	0.6583	0.6583	0.6283	0.6379	0.2093	0.3417	0.2151	0.344	0.3246	0.2641	0.1068	0.0759	0.1542	0.16	0.1417	0.1244	0.7417	0.1543	0.2392	0.2595	0.239	0.3074	0.2844	0.1199	0.2682	0.3779	0.1867	0.33	0.37	0.2901	0.2884	0.2647	0.3902	0.2926	0.1756	0.4013	0.2305	0.5012
OC56	0.1789	0.1255	0.1417	0	0.3954	0.506	0.5917	0.5917	0.5617	0.5713	0.1494	0.2674	0.1397	0.2676	0.2493	0.1903	0.1727	0.1776	0.1778	0.0939	0.2038	0.125	0.8522	0.2116	0.1725	0.1762	0.3512	0.4	0.3276	0.168	0.1932	0.3002	0.1033	0.265	0.2867	0.2136	0.2161	0.2071	0.2956	0.3412	0.2301	0.3667	0.1822	0.4346
HC01	0.439	0.3832	0.2621	0.3954	0	0.4442	0.5215	0.5204	0.5204	0.5204	0.4049	0.4624	0.4065	0.4867	0.4763	0.4116	0.2659	0.2748	0.3537	0.3822	0.2555	0.3723	0.4796	0.3806	0.3697	0.4252	0.3741	0.4944	0.4478	0.3382	0.4694	0.4524	0.3904	0.4704	0.4904	0.4514	0.4716	0.3819	0.519	0.488	0.2634	0.4926	0.3961	0.5163
SM01	0.347	0.5515	0.5726	0.506	0.4442	0	0.4485	0.3421	0.2952	0.2605	0.3701	0.2806	0.3816	0.2819	0.3075	0.3224	0.6234	0.5371	0.6087	0.5078	0.675	0.4565	0.9238	0.6802	0.439	0.5095	0.7801	0.7879	0.7775	0.5917	0.4245	0.3112	0.4248	0.3148	0.3348	0.3826	0.3075	0.315	0.69	0.7445	0.6965	0.5251	0.3688	0.4739
TP01	0.4584	0.6373	0.6583	0.5917	0.5215	0.4485	0	0.1575	0.33	0.4731	0.4563	0.5302	0.4626	0.5515	0.5106	0.5067	0.7091	0.6228	0.6944	0.5935	0.7607	0.5402	1	0.766	0.5252	0.5952	0.8659	0.8571	0.8632	0.6774	0.5102	0.4976	0.51	0.5018	0.5036	0.4532	0.3805	0.4543	0.7678	0.8273	0.7822	0.6016	0.4611	0.6884
JBO1	0.4338	0.6373	0.6583	0.5917	0.5204	0.3421	0.1575	0	0.3979	0.477	0.4554	0.4366	0.4626	0.4385	0.3986	0.4082	0.7091	0.6228	0.6944	0.5935	0.7607	0.5402	1	0.766	0.5251	0.5952	0.8659	0.8571	0.8632	0.6774	0.5102	0.3796	0.51	0.4	0.42	0.4532	0.3805	0.3949	0.7517	0.8288	0.7822	0.5561	0.4549	0.5681
11CVC	0.4095	0.6075	0.6283	0.5617	0.5204	0.2952	0.33	0.3979	0	0.2159	0.4353	0.3904	0.4469	0.4094	0.37	0.3782	0.6791	0.6004	0.6644	0.5779	0.7307	0.5117	1	0.739	0.5042	0.5652	0.8359	0.8561	0.8361	0.6474	0.4902	0.3678	0.48	0.37	0.4	0.4625	0.369	0.3908	0.7536	0.806	0.7539	0.5425	0.4295	0.5149
11CT	0.4264	0.6168	0.6379	0.5713	0.5204	0.2605	0.4731	0.477	0.2159	0	0.4515	0.3557	0.4636	0.3747	0.383	0.3912	0.6887	0.6199	0.674	0.5975	0.7403	0.5313	0.9898	0.7486	0.5138	0.5748	0.8454	0.8757	0.8557	0.657	0.5	0.3874	0.4996	0.3896	0.4096	0.4719	0.4026	0.4052	0.7718	0.8235	0.7685	0.5285	0.4415	0.4909
2QZ-9	0.1109	0.195	0.2093	0.1494	0.4049	0.3701	0.4563	0.4554	0.4353	0.4515	0	0.1919	0.064	0.2032	0.1653	0.0904	0.2635	0.217	0.2489	0.1614	0.3118	0.1306	0.8718	0.3174	0.0812	0.1431	0.4203	0.4629	0.4144	0.2328	0.1275	0.2131	0.087	0.1736	0.2172	0.1491	0.162	0.1207	0.3329	0.3859	0.3324	0.3863	0.1888	0.4081
SY-C	0.0983	0.3164	0.3417	0.2674	0.4624	0.2806	0.5302	0.4366	0.3904	0.3557	0.1919	0	0.1594	0.0611	0.0658	0.122	0.3712	0.3727	0.3893	0.298	0.4295	0.2807	0.942	0.4273	0.2099	0.2454	0.5382	0.5658	0.5177	0.3757	0.1998	0.0838	0.2282	0.0792	0.1255	0.1642	0.2129	0.1215	0.431	0.4846	0.4586	0.2693	0.1694	0.2973
SY-B	0.1033	0.1853	0.2151	0.1397	0.4065	0.3816	0.4626	0.4626	0.4469	0.4636	0.064	0.1594	0	0.2002	0.1673	0.122	0.2571	0.243	0.263	0.1863	0.3016	0.1488	0.877	0.311	0.0994	0.1362	0.4139	0.4534	0.4042	0.2526	0.1377	0.2062	0.1131	0.1712	0.1613	0.1242	0.1676	0.1307	0.3191	0.3702	0.3383	0.3924	0.1993	0.4234
1PS-4	0.1021	0.3066	0.344	0.2676	0.4867	0.2819	0.5515	0.4385	0.4094	0.3747	0.2032	0.0611	0.2002	0	0.0512	0.1209	0.363	0.3681	0.3754	0.3012	0.4157	0.2896	0.963	0.4088	0.1802	0.234	0.5249	0.5705	0.5206	0.3862	0.2032	0.0805	0.2143	0.0894	0.1035	0.1726	0.2417	0.1274	0.4568	0.5099	0.443	0.3124	0.176	0.2798
1WM-478	0.0798	0.2718	0.3246	0.2493	0.4763	0.3075	0.5106	0.3986	0.37	0.383	0.1653	0.0658	0.1673	0.0512	0	0.1094	0.3227	0.3534	0.3431	0.2763	0.3835	0.2714	0.9492	0.3741	0.1441	0.202	0.4882	0.5288	0.4761	0.3698	0.1642	0.0822	0.1788	0.0714	0.1036	0.1274	0.2013	0.0944	0.4083	0.4692	0.4211	0.2991	0.143	0.3112
1WM-520	0.0573	0.2513	0.2641	0.1903	0.4116	0.3224	0.5067	0.4082	0.3782	0.3912	0.0904	0.122	0.122	0.1209	0.1094	0	0.3169	0.2746	0.2934	0.2167	0.3525	0.1791	0.8783	0.3608	0.1293	0.1871	0.4832	0.5297	0.4758	0.2958	0.119	0.1614	0.1616	0.1189	0.1409	0.1334	0.1954	0.0965	0.412	0.4651	0.3831	0.3457	0.1575	0.3402
12-02-16-1	0.2838	0.1487	0.1068	0.1727	0.2659	0.6234	0.7091	0.7091	0.6791	0.6887	0.2635	0.3712	0.2571	0.363	0.3227	0.3169	0	0.0951	0.1279	0.1531	0.0945	0.1804	0.7455	0.1513	0.2263	0.234	0.1876	0.2922	0.251	0.1214	0.256	0.3581	0.2109	0.3336	0.3464	0.2635	0.3286	0.3193	0.3525	0.2454	0.1319	0.4259	0.2712	0.5466
12-03-16-1	0.2893	0.2043	0.0759	0.1776	0.2748	0.5371	0.6228	0.6228	0.6004	0.6199	0.217	0.3727	0.243	0.3681	0.3534	0.2746	0.0951	0	0.1985	0.1789	0.1381	0.1591	0.7132	0.1483	0.266	0.2632	0.2518	0.347	0.3016	0.1058	0.2943	0.4098	0.2063	0.3663	0.3774	0.3096	0.3019	0.3161	0.4019	0.3317	0.166	0.4532	0.2647	0.5094
12-03-16-3	0.2932	0.1262	0.1542	0.1778	0.3537	0.6087	0.6944	0.6944	0.6644	0.674	0.2489	0.3893	0.263	0.3754	0.3431	0.2934	0.1279	0.1985	0	0.1458	0.1116	0.1657	0.8272	0.0861	0.2472	0.253	0.196	0.2973	0.2126	0.1888	0.2786	0.3835	0.2325	0.3672	0.3492	0.2909	0.3211	0.3085	0.3081	0.185	0.1667	0.4379	0.2816	0.5329
10-11-15-1	0.2178	0.0983	0.16	0.0939	0.3822	0.5078	0.5935	0.5935	0.5779	0.5975	0.1614	0.298	0.1863	0.3012	0.2763	0.2167	0.1531	0.1789	0.1458	0	0.1905	0.122	0.8618	0.1755	0.1869	0.1652	0.2967	0.3366	0.2804	0.1993	0.1758	0.3306	0.1197	0.3015	0.2815	0.2223	0.2407	0.2489	0.2541	0.2813	0.2316	0.3126	0.187	0.4495
12-03-16-2	0.3352	0.1702	0.1417	0.2038	0.2555	0.675	0.7607	0.7607	0.7307	0.7403	0.3118	0.4295	0.3016	0.4157	0.3835	0.3525	0.0945	0.1381	0.1116	0.1905	0	0.2319	0.735	0.1658	0.2694	0.2625	0.1527	0.3105	0.2692	0.1296	0.3053	0.4072	0.2603	0.3996	0.371	0.3317	0.3802	0.3709	0.3681	0.2524	0.104	0.4784	0.3139	0.5951
09-CM-676	0.2	0.1275	0.1244	0.125	0.3723	0.4565	0.5402	0.5402	0.5117	0.5313	0.1306	0.2807	0.1488	0.2896	0.2714	0.1791	0.1804	0.1591	0.1657	0.122	0.2319	0	0.833	0.2372	0.1831	0.2003	0.3413	0.3963	0.3355	0.158	0.2211	0.3167	0.1303	0.2838	0.3093	0.2315	0.1943	0.2087	0.3305	0.3258	0.2509	0.3356	0.1668	0.4042
OK-10-PO1	0.9093	0.8529	0.7417	0.8522	0.4796	0.9238	1	1	1	0.9898	0.8718	0.942	0.877	0.963	0.9492	0.8783	0.7455	0.7132	0.8272	0.8618	0.735	0.833	0	0.8297	0.8356	0.9048	0.8354	0.974	0.9274	0.7896	0.9266	0.932	0.867	0.95	0.97	0.9231	0.9384	0.8615	0.9986	0.9642	0.7186	0.8699	0.8456	0.9959
OK-4-WL	0.3372	0.1379	0.1543	0.2116	0.3806	0.6802	0.766	0.766	0.739	0.7486	0.3174	0.4273	0.311	0.4088	0.3741	0.3608	0.1513	0.1483	0.0861	0.1755	0.1658	0.2372	0.8297	0	0.2684	0.2442	0.155	0.2923	0.2163	0.118	0.2851	0.4001	0.259	0.3773	0.3634	0.3201	0.3855	0.3732	0.3201	0.2162	0.1567	0.4485	0.3178	0.599
03PL12	0.1143	0.179	0.2392	0.1725	0.3697	0.439	0.5252	0.5251	0.5042	0.5138	0.0812	0.2099	0.0994	0.1802	0.1441	0.1293	0.2263	0.266	0.2472	0.1869	0.2694	0.1831	0.8356	0.2684	0	0.1034	0.3774	0.4247	0.3632	0.2862	0.1099	0.167	0.0812	0.1532	0.1618	0.0993	0.188	0.1468	0.2975	0.3598	0.3393	0.4012	0.2203	0.3804
UT1	0.1648	0.138	0.2595	0.1762	0.4252	0.5095	0.5952	0.5952	0.5652	0.5748	0.1431	0.2454	0.1362	0.234	0.202	0.1871	0.234	0.2632	0.253	0.1652	0.2625	0.2003	0.9048	0.2442	0.1034	0	0.32	0.369	0.3074	0.2934	0.1497	0.2263	0.1105	0.2124	0.1852	0.1453	0.2148	0.2004	0.245	0.3119	0.3369	0.3954	0.2049	0.4244
Washington	0.4439	0.2527	0.239	0.3512	0.3741	0.7801	0.8659	0.8659	0.8359	0.8454	0.4203	0.5382	0.4139	0.5249	0.4882	0.4832	0.1876	0.2518	0.196	0.2967	0.1527	0.3413	0.8354	0.155	0.3774	0.32	0	0.2816	0.2304	0.2178	0.4186	0.4969	0.3712	0.4771	0.479	0.4225	0.4902	0.4812	0.3373	0.2397	0.1505	0.5774	0.44	0.7075
Greene	0.4876	0.301	0.3074	0.4	0.4944	0.7879	0.8571	0.8571	0.8561	0.8757	0.4629	0.5658	0.4534	0.5705	0.5288	0.5297	0.2922	0.347	0.2973	0.3366	0.3105	0.3963	0.974	0.2923	0.4247	0.369	0.2816	0	0.1301	0.341	0.4592	0.521	0.42	0.52	0.527	0.4236	0.501	0.4968	0.2412	0.151	0.3817	0.6289	0.4851	0.7098
WV-1-PR	0.4349	0.2431	0.2844	0.3276	0.4478	0.7775	0.8632	0.8632	0.8361	0.8557	0.4144	0.5177	0.4042	0.5206	0.4761	0.4758	0.251	0.3016	0.2126	0.2804	0.2692	0.3355	0.9274	0.2163	0.3632	0.3074	0.2304	0.1301	0	0.2997	0.4027	0.5071	0.3575	0.4661	0.4631	0.41	0.4858	0.4692	0.2069	0.0581	0.3389	0.5601	0.4252	0.6938
Upper_Hermit	0.2989	0.2027	0.1199	0.168	0.3382	0.5917	0.6774	0.6774	0.6474	0.657	0.2328	0.3757	0.2526	0.3862	0.3698	0.2958	0.1214	0.1058	0.1888	0.1993	0.1296	0.158	0.7896	0.118	0.2862	0.2934	0.2178	0.341	0.2997	0	0.311	0.418	0.2254	0.3754	0.4039	0.3262	0.2969	0.3059	0.404	0.3236	0.1392	0.3852	0.2488	0.5149
Lower_Hermit	0.1102	0.2023	0.2682	0.1932	0.4694	0.4245	0.5102	0.5102	0.4902	0.5	0.1275	0.1998	0.1377	0.2032	0.1642	0.119	0.256	0.2943	0.2786	0.1758	0.3053	0.2211	0.9266	0.2851	0.1099	0.1497	0.4186	0.4592	0.4027	0.311	0	0.1819	0.118	0.1669	0.1469	0.1189	0.1395	0.1256	0.3415	0.4075	0.3502	0.3332	0.1554	0.3573
Esplanade	0.1314	0.3152	0.3779	0.3002	0.4524	0.3112	0.4976	0.3796	0.3678	0.3874	0.2131	0.0838	0.2062	0.0805	0.0822	0.1614	0.3581	0.4098	0.3835	0.3306	0.4072	0.3167	0.932	0.4001	0.167	0.2263	0.4969	0.521	0.5071	0.418	0.1819	0	0.2238	0.0701	0.1398	0.1477	0.1876	0.1218	0.4191	0.4708	0.4731	0.3106	0.1918	0.259
Hermit	0.1316	0.1741	0.1867	0.1033	0.3904	0.4248	0.51	0.51	0.48	0.4996	0.087	0.2282	0.1131	0.2143	0.1788	0.1616	0.2109	0.2063	0.2325	0.1197	0.2603	0.1303	0.867	0.259	0.0812	0.1105	0.3712	0.42	0.3575	0.2254	0.118	0.2238	0	0.2	0.19	0.1298	0.1478	0.1474	0.2917	0.3676	0.2812	0.3534	0.1649	0.3618
06GC156	0.0987	0.2908	0.33	0.265	0.4704	0.3148	0.5018	0.4	0.37	0.3896	0.1736	0.0792	0.1712	0.0894	0.0714	0.1189	0.3336	0.3663	0.3672	0.3015	0.3996	0.2838	0.95	0.3773	0.1532	0.2124	0.4771	0.52	0.4661	0.3754	0.1669	0.0701	0.2	0	0.14	0.1289	0.1737	0.1146	0.3917	0.4668	0.4402	0.3027	0.1623	0.2673
06GC155	0.1127	0.2708	0.37	0.2867	0.4904	0.3348	0.5036	0.42	0.4	0.4096	0.2172	0.1255	0.1613	0.1035	0.1036	0.1409	0.3464	0.3774	0.3492	0.2815	0.371	0.3093	0.97	0.3634	0.1618	0.1852	0.479	0.527	0.4631	0.4039	0.1469	0.1398	0.19	0.14	0	0.1114	0.1888	0.1464	0.4033	0.4665	0.4398	0.39	0.2106	0.3795
Santa_Terresa	0.0827	0.219	0.2901	0.2136	0.4514	0.3826	0.4532	0.4532	0.4625	0.4719	0.1491	0.1642	0.1242	0.1726	0.1274	0.1334	0.2635	0.3096	0.2909	0.2223	0.3317	0.2315	0.9231	0.3201	0.0993	0.1453	0.4225	0.4236	0.41	0.3262	0.1189	0.1477	0.1298	0.1289	0.1114	0	0.1498	0.1084	0.3229	0.379	0.3619	0.3592	0.1707	0.363
Mima_Mexico	0.1428	0.2665	0.2884	0.2161	0.4716	0.3075	0.3805	0.3805	0.369	0.4026	0.162	0.2129	0.1676	0.2417	0.2013	0.1954	0.3286	0.3019	0.3211	0.2407	0.3802	0.1943	0.9384	0.3855	0.188	0.2148	0.4902	0.501	0.4858	0.2969	0.1395	0.1876	0.1478	0.1737	0.1888	0.1498	0	0.136	0.4006	0.4506	0.4025	0.2872	0.1505	0.3603
Kindle	0.085	0.2526	0.2647	0.2071	0.3819	0.315	0.4543	0.3949	0.3908	0.4052	0.1207	0.1215	0.1307	0.1274	0.0944	0.0965	0.3193	0.3161	0.3085	0.2489	0.3709	0.2087	0.8615	0.3732	0.1468	0.2004	0.4812	0.4968	0.4692	0.3059	0.1256	0.1218	0.1474	0.1146	0.1464	0.1084	0.136	0	0.3791	0.4358	0.3882	0.2759	0.0875	0.3142
O_M source	0.3559	0.2187	0.3902	0.2956	0.519	0.69	0.7678	0.7517	0.7536	0.7718	0.3329	0.431	0.3191	0.4568	0.4083	0.412	0.3525	0.4019	0.3081	0.2541	0.3681	0.3305	0.9986	0.3201	0.2975	0.245	0.3373	0.2412	0.2069	0.404	0.3415	0.4191	0.2917	0.3917	0.4033	0.3229	0.4006	0.3791	0	0.1908	0.4342	0.4964	0.3599	0.5993
Central_App_Crys	0.4078	0.2315	0.2926	0.3412	0.488	0.7445	0.8273	0.8288	0.806	0.8235	0.3859	0.4846	0.3702	0.5099	0.4692	0.4651	0.2454	0.3317	0.185	0.2813	0.2524	0.3258	0.9642	0.2162	0.3598	0.3119	0.2397	0.151	0.0581	0.3236	0.4075	0.4708	0.3676	0.4668	0.4665	0.379	0.4506	0.4358	0.1908	0	0.3115	0.5645	0.42	0.6563
N_Appalachian	0.3617	0.2349	0.1756	0.2301	0.2634	0.6965	0.7822	0.7822	0.7539	0.7685	0.3324	0.4586	0.3383	0.443	0.4211	0.3831	0.1319	0.166	0.1667	0.2316	0.104	0.2509	0.7186	0.1567	0.3393	0.3369	0.1505	0.3817	0.3389	0.1392	0.3502	0.4731	0.2812	0.4402	0.4398	0.3619	0.4025	0.3882	0.4342	0.3115	0	0.4624	0.3449	0.6151
NW_Arctic	0.3273	0.3946	0.4013	0.3667	0.4926	0.5251	0.6016	0.5561	0.5425	0.5285	0.3863	0.2693	0.3924	0.3124	0.2991	0.3457	0.4259	0.4532	0.4379	0.3126	0.4784	0.3356	0.8699	0.4485	0.4012	0.3954	0.5774	0.6289	0.5601	0.3852	0.3332	0.3106	0.3534	0.3027	0.39	0.3592	0.2872	0.2759	0.4964	0.5645	0.4624	0	0.1995	0.1745
NE_Arctic	0.1456	0.2328	0.2305	0.1822	0.3961	0.3688	0.4611	0.4549	0.4295	0.4415	0.1888	0.1694	0.1993	0.176	0.143	0.1575	0.2712	0.2647	0.2816	0.187	0.3139	0.1668	0.8456	0.3178	0.2203	0.2049	0.44	0.4851	0.4252	0.2488	0.1554	0.1918	0.1649	0.1623	0.2106	0.1707	0.1505	0.0875	0.3599	0.42	0.3449	0.1995	0	0.2833
Sonora	0.3434	0.4857	0.5012	0.4346	0.5163	0.4739	0.6884	0.5681	0.5149	0.4909	0.4081	0.2973	0.4234	0.2798	0.3112	0.3402	0.5466	0.5094	0.5329	0.4495	0.5951	0.4042	0.9959	0.599	0.3804	0.4244	0.7075	0.7098	0.6938	0.5149	0.3573	0.259	0.3618	0.2673	0.3795	0.363	0.3603	0.3142	0.5993	0.6563	0.6151	0.1745	0.2833	0
kde_like	AZShelf3	MS07	OC2-8	OC56	HC01	SM01	TP01	JBO1	11CVC	11CT	2QZ-9	SY-C	SY-B	1PS-4	1WM-478	1WM-520	12-02-16-1	12-03-16-1	12-03-16-3	10-11-15-1	12-03-16-2	09-CM-676	OK-10-PO1	OK-4-WL	03PL12	UT1	Washington	Greene	WV-1-PR	Upper_Hermit	Lower_Hermit	Esplanade	Hermit	06GC156	06GC155	Santa_Terresa	Mima_Mexico	Kindle	O_M source	Central_App_Crys	N_Appalachian	NW_Arctic	NE_Arctic	Sonora
AZShelf3	1	0.736	0.7006	0.771	0.213	0.2523	0.1177	0.1194	0.1639	0.1698	0.8246	0.8597	0.8594	0.8309	0.8493	0.8625	0.6854	0.6897	0.6687	0.6751	0.6379	0.7273	0.0322	0.6582	0.8059	0.798	0.5488	0.4414	0.5359	0.6782	0.7969	0.7965	0.8164	0.8031	0.8298	0.7923	0.5847	0.7985	0.4474	0.5124	0.5914	0.6213	0.747	0.5858
MS07	0.736	1	0.7006	0.7184	0.1239	0.1535	0.0915	0.0602	0.0951	0.0892	0.6785	0.6616	0.7097	0.6563	0.6961	0.6976	0.7604	0.6876	0.7904	0.7569	0.7586	0.6588	0.0372	0.7704	0.7143	0.7614	0.6681	0.5402	0.6687	0.6784	0.7088	0.6623	0.709	0.6552	0.6919	0.6757	0.5559	0.6956	0.5644	0.6182	0.6898	0.5774	0.6969	0.4613
OC2-8	0.7006	0.7006	1	0.8218	0.1679	0.1984	0.0851	0.081	0.1164	0.1171	0.7437	0.6296	0.725	0.6192	0.6515	0.6881	0.7671	0.825	0.7066	0.6716	0.6909	0.8053	0.0615	0.7129	0.7873	0.7353	0.6535	0.4314	0.516	0.8082	0.6441	0.609	0.771	0.688	0.6487	0.6346	0.5301	0.7084	0.3739	0.4879	0.6405	0.6093	0.7295	0.4371
OC56	0.771	0.7184	0.8218	1	0.1685	0.2046	0.0704	0.0857	0.1243	0.1293	0.758	0.7094	0.7655	0.7014	0.7186	0.7665	0.7342	0.7421	0.7213	0.6769	0.6891	0.7862	0.0531	0.7147	0.837	0.8269	0.6458	0.4557	0.5225	0.7547	0.759	0.6872	0.8131	0.7632	0.7357	0.7066	0.5461	0.7388	0.3995	0.5051	0.6568	0.603	0.7338	0.4924
HC01	0.213	0.1239	0.1679	0.1685	1	0.5128	0.2448	0.3421	0.351	0.3741	0.209	0.2146	0.2024	0.2034	0.1954	0.2164	0.1479	0.2081	0.1496	0.1557	0.1047	0.2073	0.3443	0.1359	0.2156	0.1925	0.0908	0.0865	0.096	0.1642	0.1769	0.2393	0.2256	0.2164	0.209	0.2374	0.2728	0.2176	0.097	0.1036	0.1062	0.1589	0.1894	0.2846
SM01	0.2523	0.1535	0.1984	0.2046	0.5128	1	0.4617	0.5672	0.5553	0.5384	0.2577	0.2495	0.2523	0.2553	0.239	0.2628	0.1675	0.2453	0.169	0.1571	0.141	0.2293	0.072	0.1459	0.256	0.2314	0.1241	0.1206	0.1319	0.182	0.2094	0.2851	0.26	0.2574	0.26	0.2911	0.3037	0.256	0.1384	0.1338	0.1255	0.1638	0.2133	0.3339
TP01	0.1177	0.0915	0.0851	0.0704	0.2448	0.4617	1	0.7479	0.6632	0.5342	0.1218	0.1351	0.1361	0.0961	0.0994	0.0983	0.0886	0.1165	0.0927	0.0905	0.0716	0.1018	-0.00019626	0.0629	0.0909	0.0965	0.0871	0.1152	0.0878	0.0887	0.054	0.1186	0.0927	0.1033	0.1097	0.1354	0.2461	0.1435	0.1215	0.1106	0.0615	0.0764	0.0876	0.1394
JBO1	0.1194	0.0602	0.081	0.0857	0.3421	0.5672	0.7479	1	0.6127	0.5173	0.1197	0.1293	0.1277	0.115	0.1157	0.1199	0.0729	0.1065	0.0704	0.0714	0.0492	0.0968	-0.00019706	0.049	0.1131	0.1068	0.0581	0.0783	0.0653	0.0719	0.0861	0.1505	0.1202	0.1282	0.1305	0.1691	0.2057	0.1348	0.1114	0.0743	0.0495	0.073	0.0828	0.2006
11CVC	0.1639	0.0951	0.1164	0.1243	0.351	0.5553	0.6632	0.6127	1	0.7995	0.16	0.1728	0.1697	0.1618	0.1577	0.1651	0.1077	0.1394	0.1032	0.1028	0.0795	0.1332	-8.4157e-05	0.0819	0.1554	0.1466	0.0821	0.0964	0.0894	0.1018	0.1285	0.1914	0.1603	0.17	0.1747	0.2023	0.2489	0.1723	0.1098	0.1033	0.0812	0.1063	0.1206	0.2422
11CT	0.1698	0.0892	0.1171	0.1293	0.3741	0.5384	0.5342	0.5173	0.7995	1	0.1662	0.1761	0.1711	0.1655	0.1641	0.1769	0.1066	0.1406	0.1046	0.1065	0.0722	0.1376	9.6036e-05	0.0752	0.1605	0.1509	0.0704	0.0729	0.0748	0.0949	0.1343	0.1897	0.1654	0.1703	0.177	0.1977	0.2362	0.1731	0.0782	0.0859	0.0792	0.1099	0.1231	0.2361
2QZ-9	0.8246	0.6785	0.7437	0.758	0.209	0.2577	0.1218	0.1197	0.16	0.1662	1	0.7344	0.8514	0.7011	0.7505	0.8206	0.6345	0.7662	0.6394	0.6564	0.6069	0.7785	0.0502	0.6462	0.7701	0.7158	0.5348	0.3872	0.4759	0.7218	0.7085	0.6675	0.7814	0.7141	0.745	0.7149	0.5567	0.7693	0.3732	0.4556	0.5801	0.5866	0.717	0.5105
SY-C	0.8597	0.6616	0.6296	0.7094	0.2146	0.2495	0.1351	0.1293	0.1728	0.1761	0.7344	1	0.7952	0.816	0.7943	0.8022	0.6204	0.6252	0.6233	0.6203	0.5764	0.6665	0.0135	0.5675	0.7505	0.7412	0.4735	0.419	0.4866	0.61	0.7174	0.7991	0.7483	0.7952	0.8049	0.7373	0.5609	0.795	0.4617	0.4914	0.523	0.618	0.7134	0.6232
SY-B	0.8594	0.7097	0.725	0.7655	0.2024	0.2523	0.1361	0.1277	0.1697	0.1711	0.8514	0.7952	1	0.7419	0.7594	0.84	0.6701	0.7475	0.6666	0.657	0.636	0.7464	0.0359	0.6573	0.7906	0.7694	0.56	0.432	0.52	0.703	0.7303	0.7422	0.7894	0.7547	0.7759	0.7434	0.5847	0.8146	0.4272	0.5006	0.5773	0.5889	0.7182	0.5242
1PS-4	0.8309	0.6563	0.6192	0.7014	0.2034	0.2553	0.0961	0.115	0.1618	0.1655	0.7011	0.816	0.7419	1	0.8244	0.8104	0.6378	0.5814	0.612	0.6004	0.5766	0.6303	0.016	0.5727	0.7627	0.7506	0.4875	0.4302	0.4923	0.5889	0.7527	0.7814	0.7279	0.81	0.8326	0.7669	0.5131	0.7294	0.4259	0.4941	0.5211	0.5602	0.6622	0.6178
1WM-478	0.8493	0.6961	0.6515	0.7186	0.1954	0.239	0.0994	0.1157	0.1577	0.1641	0.7505	0.7943	0.7594	0.8244	1	0.8043	0.6439	0.6186	0.6245	0.6478	0.5884	0.6736	0.0219	0.6014	0.7861	0.7779	0.5187	0.4253	0.522	0.6136	0.7869	0.804	0.7725	0.8064	0.8171	0.7862	0.5696	0.7445	0.4306	0.4931	0.5488	0.6078	0.7057	0.6261
1WM-520	0.8625	0.6976	0.6881	0.7665	0.2164	0.2628	0.0983	0.1199	0.1651	0.1769	0.8206	0.8022	0.84	0.8104	0.8043	1	0.6517	0.7114	0.662	0.6628	0.616	0.7435	0.04	0.6126	0.8058	0.7804	0.5226	0.372	0.4798	0.6753	0.762	0.7575	0.8082	0.7746	0.812	0.7373	0.5535	0.7731	0.3663	0.4355	0.5545	0.6075	0.7342	0.5654
12-02-16-1	0.6854	0.7604	0.7671	0.7342	0.1479	0.1675	0.0886	0.0729	0.1077	0.1066	0.6345	0.6204	0.6701	0.6378	0.6439	0.6517	1	0.7291	0.7979	0.7029	0.8263	0.6759	0.0358	0.7223	0.7267	0.7633	0.7007	0.5293	0.6043	0.7286	0.6568	0.6347	0.7074	0.6741	0.6699	0.6348	0.5085	0.681	0.4551	0.5869	0.7084	0.5768	0.6521	0.418
12-03-16-1	0.6897	0.6876	0.825	0.7421	0.2081	0.2453	0.1165	0.1065	0.1394	0.1406	0.7662	0.6252	0.7475	0.5814	0.6186	0.7114	0.7291	1	0.694	0.6682	0.6851	0.8166	0.0756	0.6598	0.7178	0.7038	0.6184	0.4147	0.4876	0.7729	0.6158	0.591	0.7744	0.6275	0.624	0.6235	0.5389	0.7097	0.3528	0.465	0.6041	0.5421	0.697	0.426
12-03-16-3	0.6687	0.7904	0.7066	0.7213	0.1496	0.169	0.0927	0.0704	0.1032	0.1046	0.6394	0.6233	0.6666	0.612	0.6245	0.662	0.7979	0.694	1	0.7449	0.7855	0.6646	0.0435	0.7473	0.7038	0.7683	0.7161	0.5424	0.6244	0.6659	0.6689	0.6248	0.6781	0.6406	0.6538	0.6188	0.4766	0.6898	0.4894	0.6266	0.7211	0.5614	0.6307	0.4093
10-11-15-1	0.6751	0.7569	0.6716	0.6769	0.1557	0.1571	0.0905	0.0714	0.1028	0.1065	0.6564	0.6203	0.657	0.6004	0.6478	0.6628	0.7029	0.6682	0.7449	1	0.659	0.6797	0.0401	0.7375	0.6664	0.7172	0.6132	0.4912	0.5894	0.6972	0.6845	0.6323	0.7009	0.6336	0.6251	0.6273	0.5918	0.6518	0.477	0.5544	0.639	0.6322	0.6513	0.4815
12-03-16-2	0.6379	0.7586	0.6909	0.6891	0.1047	0.141	0.0716	0.0492	0.0795	0.0722	0.6069	0.5764	0.636	0.5766	0.5884	0.616	0.8263	0.6851	0.7855	0.659	1	0.6023	0.0424	0.7286	0.6662	0.7348	0.7068	0.5213	0.6218	0.6547	0.6631	0.594	0.6465	0.5919	0.6198	0.5883	0.4402	0.6191	0.4835	0.6021	0.7453	0.505	0.6046	0.3536
09-CM-676	0.7273	0.6588	0.8053	0.7862	0.2073	0.2293	0.1018	0.0968	0.1332	0.1376	0.7785	0.6665	0.7464	0.6303	0.6736	0.7435	0.6759	0.8166	0.6646	0.6797	0.6023	1	0.0736	0.6812	0.7766	0.7377	0.5816	0.3673	0.4513	0.8283	0.6467	0.6398	0.8339	0.6962	0.6575	0.6389	0.5939	0.7571	0.3332	0.4194	0.5722	0.6487	0.7682	0.4969
OK-10-PO1	0.0322	0.0372	0.0615	0.0531	0.3443	0.072	-0.00019626	-0.00019706	-8.4157e-05	9.6036e-05	0.0502	0.0135	0.0359	0.016	0.0219	0.04	0.0358	0.0756	0.0435	0.0401	0.0424	0.0736	1	0.0835	0.0551	0.0427	0.042	0.0109	0.0326	0.0851	0.0422	0.0156	0.058	0.022	0.013	0.0333	0.0415	0.03	0.00081505	0.02	0.0468	0.033	0.0733	0.0039
OK-4-WL	0.6582	0.7704	0.7129	0.7147	0.1359	0.1459	0.0629	0.049	0.0819	0.0752	0.6462	0.5675	0.6573	0.5727	0.6014	0.6126	0.7223	0.6598	0.7473	0.7375	0.7286	0.6812	0.0835	1	0.6807	0.7424	0.716	0.5611	0.6674	0.7704	0.6875	0.5985	0.6972	0.6069	0.6233	0.6207	0.5584	0.607	0.5494	0.6535	0.727	0.5343	0.6598	0.3701
03PL12	0.8059	0.7143	0.7873	0.837	0.2156	0.256	0.0909	0.1131	0.1554	0.1605	0.7701	0.7505	0.7906	0.7627	0.7861	0.8058	0.7267	0.7178	0.7038	0.6664	0.6662	0.7766	0.0551	0.6807	1	0.8501	0.616	0.4467	0.556	0.7126	0.7598	0.7683	0.8458	0.8577	0.806	0.7569	0.5405	0.7841	0.4212	0.503	0.5966	0.6147	0.7363	0.5556
UT1	0.798	0.7614	0.7353	0.8269	0.1925	0.2314	0.0965	0.1068	0.1466	0.1509	0.7158	0.7412	0.7694	0.7506	0.7779	0.7804	0.7633	0.7038	0.7683	0.7172	0.7348	0.7377	0.0427	0.7424	0.8501	1	0.6945	0.5524	0.6423	0.6981	0.8259	0.7844	0.8055	0.8132	0.8056	0.7652	0.5522	0.7547	0.5073	0.6074	0.6303	0.5837	0.7155	0.516
Washington	0.5488	0.6681	0.6535	0.6458	0.0908	0.1241	0.0871	0.0581	0.0821	0.0704	0.5348	0.4735	0.56	0.4875	0.5187	0.5226	0.7007	0.6184	0.7161	0.6132	0.7068	0.5816	0.042	0.716	0.616	0.6945	1	0.7124	0.7433	0.6481	0.5786	0.5099	0.6062	0.5371	0.5448	0.5453	0.4243	0.5198	0.5514	0.7344	0.6381	0.4136	0.5084	0.2707
Greene	0.4414	0.5402	0.4314	0.4557	0.0865	0.1206	0.1152	0.0783	0.0964	0.0729	0.3872	0.419	0.432	0.4302	0.4253	0.372	0.5293	0.4147	0.5424	0.4912	0.5213	0.3673	0.0109	0.5611	0.4467	0.5524	0.7124	1	0.79	0.4288	0.4769	0.4433	0.4191	0.4719	0.4973	0.4747	0.368	0.4149	0.671	0.8211	0.4803	0.2711	0.3545	0.2658
WV-1-PR	0.5359	0.6687	0.516	0.5225	0.096	0.1319	0.0878	0.0653	0.0894	0.0748	0.4759	0.4866	0.52	0.4923	0.522	0.4798	0.6043	0.4876	0.6244	0.5894	0.6218	0.4513	0.0326	0.6674	0.556	0.6423	0.7433	0.79	1	0.5082	0.5607	0.5153	0.5249	0.525	0.5453	0.5577	0.3971	0.4767	0.7319	0.8434	0.5725	0.3823	0.4675	0.2983
Upper_Hermit	0.6782	0.6784	0.8082	0.7547	0.1642	0.182	0.0887	0.0719	0.1018	0.0949	0.7218	0.61	0.703	0.5889	0.6136	0.6753	0.7286	0.7729	0.6659	0.6972	0.6547	0.8283	0.0851	0.7704	0.7126	0.6981	0.6481	0.4288	0.5082	1	0.5999	0.5814	0.7551	0.6428	0.5952	0.6002	0.6047	0.688	0.3824	0.4816	0.6338	0.6149	0.7365	0.4233
Lower_Hermit	0.7969	0.7088	0.6441	0.759	0.1769	0.2094	0.054	0.0861	0.1285	0.1343	0.7085	0.7174	0.7303	0.7527	0.7869	0.762	0.6568	0.6158	0.6689	0.6845	0.6631	0.6467	0.0422	0.6875	0.7598	0.8259	0.5786	0.4769	0.5607	0.5999	1	0.7633	0.771	0.77	0.7984	0.76	0.5288	0.6718	0.464	0.5329	0.59	0.5674	0.676	0.5463
Esplanade	0.7965	0.6623	0.609	0.6872	0.2393	0.2851	0.1186	0.1505	0.1914	0.1897	0.6675	0.7991	0.7422	0.7814	0.804	0.7575	0.6347	0.591	0.6248	0.6323	0.594	0.6398	0.0156	0.5985	0.7683	0.7844	0.5099	0.4433	0.5153	0.5814	0.7633	1	0.7605	0.8396	0.802	0.7413	0.5534	0.7703	0.4679	0.5015	0.5013	0.6208	0.6917	0.668
Hermit	0.8164	0.709	0.771	0.8131	0.2256	0.26	0.0927	0.1202	0.1603	0.1654	0.7814	0.7483	0.7894	0.7279	0.7725	0.8082	0.7074	0.7744	0.6781	0.7009	0.6465	0.8339	0.058	0.6972	0.8458	0.8055	0.6062	0.4191	0.5249	0.7551	0.771	0.7605	1	0.783	0.7626	0.7509	0.5932	0.7825	0.4013	0.4748	0.611	0.6479	0.7639	0.5636
06GC156	0.8031	0.6552	0.688	0.7632	0.2164	0.2574	0.1033	0.1282	0.17	0.1703	0.7141	0.7952	0.7547	0.81	0.8064	0.7746	0.6741	0.6275	0.6406	0.6336	0.5919	0.6962	0.022	0.6069	0.8577	0.8132	0.5371	0.4719	0.525	0.6428	0.77	0.8396	0.783	1	0.8472	0.7308	0.5642	0.7921	0.4324	0.5241	0.5372	0.6376	0.7332	0.6369
06GC155	0.8298	0.6919	0.6487	0.7357	0.209	0.26	0.1097	0.1305	0.1747	0.177	0.745	0.8049	0.7759	0.8326	0.8171	0.812	0.6699	0.624	0.6538	0.6251	0.6198	0.6575	0.013	0.6233	0.806	0.8056	0.5448	0.4973	0.5453	0.5952	0.7984	0.802	0.7626	0.8472	1	0.7705	0.5167	0.7305	0.4937	0.551	0.5522	0.5489	0.6563	0.5935
Santa_Terresa	0.7923	0.6757	0.6346	0.7066	0.2374	0.2911	0.1354	0.1691	0.2023	0.1977	0.7149	0.7373	0.7434	0.7669	0.7862	0.7373	0.6348	0.6235	0.6188	0.6273	0.5883	0.6389	0.0333	0.6207	0.7569	0.7652	0.5453	0.4747	0.5577	0.6002	0.76	0.7413	0.7509	0.7308	0.7705	1	0.574	0.7076	0.4972	0.5257	0.5593	0.5439	0.6365	0.6242
Mima_Mexico	0.5847	0.5559	0.5301	0.5461	0.2728	0.3037	0.2461	0.2057	0.2489	0.2362	0.5567	0.5609	0.5847	0.5131	0.5696	0.5535	0.5085	0.5389	0.4766	0.5918	0.4402	0.5939	0.0415	0.5584	0.5405	0.5522	0.4243	0.368	0.3971	0.6047	0.5288	0.5534	0.5932	0.5642	0.5167	0.574	1	0.6048	0.4038	0.4112	0.4669	0.5536	0.6083	0.5835
Kindle	0.7985	0.6956	0.7084	0.7388	0.2176	0.256	0.1435	0.1348	0.1723	0.1731	0.7693	0.795	0.8146	0.7294	0.7445	0.7731	0.681	0.7097	0.6898	0.6518	0.6191	0.7571	0.03	0.607	0.7841	0.7547	0.5198	0.4149	0.4767	0.688	0.6718	0.7703	0.7825	0.7921	0.7305	0.7076	0.6048	1	0.4116	0.476	0.5552	0.6929	0.7645	0.6296
O_M source	0.4474	0.5644	0.3739	0.3995	0.097	0.1384	0.1215	0.1114	0.1098	0.0782	0.3732	0.4617	0.4272	0.4259	0.4306	0.3663	0.4551	0.3528	0.4894	0.477	0.4835	0.3332	0.00081505	0.5494	0.4212	0.5073	0.5514	0.671	0.7319	0.3824	0.464	0.4679	0.4013	0.4324	0.4937	0.4972	0.4038	0.4116	1	0.7149	0.4548	0.3048	0.3654	0.3703
Central_App_Crys	0.5124	0.6182	0.4879	0.5051	0.1036	0.1338	0.1106	0.0743	0.1033	0.0859	0.4556	0.4914	0.5006	0.4941	0.4931	0.4355	0.5869	0.465	0.6266	0.5544	0.6021	0.4194	0.02	0.6535	0.503	0.6074	0.7344	0.8211	0.8434	0.4816	0.5329	0.5015	0.4748	0.5241	0.551	0.5257	0.4112	0.476	0.7149	1	0.5755	0.3413	0.4275	0.3085
N_Appalachian	0.5914	0.6898	0.6405	0.6568	0.1062	0.1255	0.0615	0.0495	0.0812	0.0792	0.5801	0.523	0.5773	0.5211	0.5488	0.5545	0.7084	0.6041	0.7211	0.639	0.7453	0.5722	0.0468	0.727	0.5966	0.6303	0.6381	0.4803	0.5725	0.6338	0.59	0.5013	0.611	0.5372	0.5522	0.5593	0.4669	0.5552	0.4548	0.5755	1	0.4991	0.5727	0.3453
NW_Arctic	0.6213	0.5774	0.6093	0.603	0.1589	0.1638	0.0764	0.073	0.1063	0.1099	0.5866	0.618	0.5889	0.5602	0.6078	0.6075	0.5768	0.5421	0.5614	0.6322	0.505	0.6487	0.033	0.5343	0.6147	0.5837	0.4136	0.2711	0.3823	0.6149	0.5674	0.6208	0.6479	0.6376	0.5489	0.5439	0.5536	0.6929	0.3048	0.3413	0.4991	1	0.7424	0.5781
NE_Arctic	0.747	0.6969	0.7295	0.7338	0.1894	0.2133	0.0876	0.0828	0.1206	0.1231	0.717	0.7134	0.7182	0.6622	0.7057	0.7342	0.6521	0.697	0.6307	0.6513	0.6046	0.7682	0.0733	0.6598	0.7363	0.7155	0.5084	0.3545	0.4675	0.7365	0.676	0.6917	0.7639	0.7332	0.6563	0.6365	0.6083	0.7645	0.3654	0.4275	0.5727	0.7424	1	0.5539
Sonora	0.5858	0.4613	0.4371	0.4924	0.2846	0.3339	0.1394	0.2006	0.2422	0.2361	0.5105	0.6232	0.5242	0.6178	0.6261	0.5654	0.418	0.426	0.4093	0.4815	0.3536	0.4969	0.0039	0.3701	0.5556	0.516	0.2707	0.2658	0.2983	0.4233	0.5463	0.668	0.5636	0.6369	0.5935	0.6242	0.5835	0.6296	0.3703	0.3085	0.3453	0.5781	0.5539	1

## Sheet: 4-Leonardian-Guadalupian
Leary, R.J., Umhoefer, P., Smith, M.E., Smith, T.M., Saylor, J.E., Riggs, N., Burr, G., Lodes, E., Foley, D., Licht, A., Mueller, M.A., and Baird, C., 2020, Provenance of Pennsylvanian–Permian sedimentary rocks associated with the Ancestral Rocky Mountains orogeny in southwestern Laurentia: Implications for continental-scale Laurentian sediment transport systems: Lithosphere, https://doi.org/10.1…
pdp_x	AZ Shelf 4	CO-PR-2-0	12CV50	10CVG	10CVR	10CVW	11WRB	11WRA	2QZ-272	SY-A	3PS-100	4PS-186	Prv	pk0125151	10-12-15-3	6-20-17-3	6-20-17-4	Kaibab2	Coconino2	Kaibab	Toroweap2	Coconino1	Toroweap1	HB-01-10	HB-02-10	PHOS	JCT-4946	CC-I	CC-II	CC-III	BrushCn	Rader	Yates	Brushy	O_M source	Central Appalachian	N_Appalachian	NW Arctic	NE.Arctic	Sonora_
AZ Shelf 4	1	0.3059	0.2665	0.3654	0.4735	0.5633	0.5768	0.6877	0.8838	0.8491	0.6485	0.8723	0.7097	0.1432	0.3814	0.3042	0.713	0.7137	0.793	0.6591	0.6851	0.7081	0.5885	0.6632	0.6257	0.6075	0.1126	0.3388	0.243	0.2611	0.4991	0.4255	0.4004	0.4365	0.3779	0.4138	0.3139	0.1824	0.5484	0.2844
CO-PR-2-0	0.3059	1	0.1586	0.0812	0.2177	0.1234	0.2886	0.2813	0.3099	0.186	0.3855	0.2886	0.1893	0.2774	0.1354	0.2573	0.3838	0.1783	0.1765	0.2465	0.1158	0.1386	0.188	0.1274	0.1321	0.1504	0.1292	0.2398	0.2649	0.2635	0.3253	0.4132	0.3264	0.3477	0.0792	0.1428	0.3345	0.0773	0.2348	0.003
12CV50	0.2665	0.1586	1	0.5133	0.455	0.1904	0.2854	0.2386	0.2326	0.27	0.1416	0.2291	0.2936	0.3289	0.0925	0.1649	0.2545	0.1958	0.1129	0.1748	0.1624	0.1891	0.2553	0.1344	0.1159	0.192	0.0795	0.1768	0.1864	0.2353	0.1722	0.2286	0.3591	0.2749	0.0725	0.0882	0.335	0.0948	0.2041	0.0801
10CVG	0.3654	0.0812	0.5133	1	0.4642	0.2013	0.2174	0.1996	0.3185	0.3183	0.1739	0.2795	0.3358	0.0633	0.1555	0.06	0.2465	0.259	0.2279	0.3402	0.3009	0.3393	0.3181	0.1544	0.1661	0.2762	0.0856	0.1087	0.126	0.1511	0.1533	0.1335	0.2057	0.1457	0.1431	0.1282	0.1313	0.0681	0.2035	0.225
10CVR	0.4735	0.2177	0.455	0.4642	1	0.3752	0.3698	0.3553	0.4069	0.4167	0.3482	0.3606	0.4451	0.2802	0.1354	0.1668	0.4099	0.3241	0.2738	0.3765	0.2574	0.341	0.444	0.2371	0.234	0.3005	0.1749	0.2697	0.2451	0.2866	0.313	0.3158	0.4072	0.3113	0.1573	0.1632	0.2332	0.0794	0.2788	0.0967
10CVW	0.5633	0.1234	0.1904	0.2013	0.3752	1	0.3631	0.3708	0.4622	0.4988	0.2608	0.5263	0.5142	0.0664	0.2189	0.2055	0.4171	0.4566	0.4797	0.3759	0.4582	0.4368	0.3208	0.4421	0.3888	0.3387	0.0782	0.1599	0.1224	0.1852	0.3312	0.3083	0.2867	0.2916	0.3715	0.3693	0.2116	0.1538	0.3306	0.2414
11WRB	0.5768	0.2886	0.2854	0.2174	0.3698	0.3631	1	0.4714	0.5537	0.4453	0.4906	0.4852	0.3672	0.2478	0.1451	0.1434	0.4437	0.3394	0.3434	0.4288	0.3578	0.3436	0.4431	0.364	0.297	0.2464	0.1541	0.2957	0.2658	0.3434	0.3212	0.4171	0.3847	0.3292	0.1007	0.1259	0.2935	0.1536	0.438	0.1384
11WRA	0.6877	0.2813	0.2386	0.1996	0.3553	0.3708	0.4714	1	0.6149	0.6193	0.4775	0.5581	0.4863	0.2164	0.182	0.1823	0.5088	0.4949	0.5406	0.4251	0.4391	0.4233	0.4582	0.4583	0.4122	0.5226	0.0812	0.2552	0.1962	0.2422	0.3549	0.3497	0.3789	0.3743	0.2011	0.1982	0.275	0.1258	0.4331	0.2062
2QZ-272	0.8838	0.3099	0.2326	0.3185	0.4069	0.4622	0.5537	0.6149	1	0.685	0.5903	0.7478	0.6517	0.1412	0.342	0.2701	0.6458	0.5813	0.6771	0.5347	0.5631	0.5702	0.5167	0.555	0.5513	0.5493	0.1462	0.3363	0.2812	0.3138	0.439	0.3598	0.3757	0.3859	0.2992	0.2781	0.3455	0.2432	0.571	0.2578
SY-A	0.8491	0.186	0.27	0.3183	0.4167	0.4988	0.4453	0.6193	0.685	1	0.3841	0.719	0.6383	0.0643	0.3319	0.2022	0.5218	0.7191	0.6488	0.4118	0.614	0.5845	0.4395	0.7355	0.668	0.5544	0.0428	0.1492	0.1097	0.1197	0.2788	0.2519	0.2619	0.2555	0.288	0.3067	0.2193	0.1515	0.4376	0.3411
3PS-100	0.6485	0.3855	0.1416	0.1739	0.3482	0.2608	0.4906	0.4775	0.5903	0.3841	1	0.4512	0.3822	0.2474	0.1626	0.2451	0.5086	0.3629	0.4448	0.5573	0.3679	0.3973	0.3781	0.2961	0.3197	0.2869	0.129	0.4598	0.2157	0.2349	0.4717	0.4187	0.3711	0.3661	0.1418	0.2171	0.1822	0.0789	0.4263	0.0589
4PS-186	0.8723	0.2886	0.2291	0.2795	0.3606	0.5263	0.4852	0.5581	0.7478	0.719	0.4512	1	0.6579	0.1463	0.4228	0.3277	0.7182	0.5564	0.6817	0.5635	0.5344	0.5839	0.4916	0.6011	0.5222	0.5439	0.0938	0.2995	0.2505	0.2758	0.5111	0.4309	0.3737	0.4876	0.446	0.4575	0.3927	0.1731	0.4365	0.2338
Prv	0.7097	0.1893	0.2936	0.3358	0.4451	0.5142	0.3672	0.4863	0.6517	0.6383	0.3822	0.6579	1	0.136	0.3379	0.2653	0.5268	0.5174	0.4966	0.439	0.5263	0.4673	0.433	0.4599	0.4547	0.5068	0.1024	0.2355	0.2044	0.2486	0.3749	0.3124	0.3278	0.3647	0.3326	0.2666	0.2353	0.2191	0.4686	0.291
pk0125151	0.1432	0.2774	0.3289	0.0633	0.2802	0.0664	0.2478	0.2164	0.1412	0.0643	0.2474	0.1463	0.136	1	0.0221	0.1521	0.2913	0.0636	0.0322	0.1497	0.0285	0.0353	0.2252	0.0425	0.0351	0.085	0.1809	0.3752	0.2815	0.2804	0.2601	0.3648	0.4696	0.429	0.0046	0.0141	0.2777	0.0398	0.1261	0.00049741
10-12-15-3	0.3814	0.1354	0.0925	0.1555	0.1354	0.2189	0.1451	0.182	0.342	0.3319	0.1626	0.4228	0.3379	0.0221	1	0.2077	0.319	0.2321	0.3381	0.2348	0.3112	0.3306	0.1216	0.2792	0.2782	0.2276	0.011	0.0731	0.0704	0.0569	0.316	0.1491	0.107	0.2268	0.3024	0.3756	0.1506	0.3252	0.3508	0.2111
6-20-17-3	0.3042	0.2573	0.1649	0.06	0.1668	0.2055	0.1434	0.1823	0.2701	0.2022	0.2451	0.3277	0.2653	0.1521	0.2077	1	0.2802	0.1733	0.2824	0.1717	0.1828	0.2712	0.1075	0.1711	0.1739	0.2027	0.0221	0.1436	0.1312	0.1675	0.4868	0.2824	0.25	0.46	0.2328	0.3751	0.3481	0.0829	0.219	0.021
6-20-17-4	0.713	0.3838	0.2545	0.2465	0.4099	0.4171	0.4437	0.5088	0.6458	0.5218	0.5086	0.7182	0.5268	0.2913	0.319	0.2802	1	0.4909	0.5298	0.4802	0.3828	0.4203	0.5224	0.4147	0.4181	0.4446	0.1968	0.4553	0.3297	0.3748	0.566	0.4873	0.5506	0.5869	0.2793	0.3333	0.4533	0.1686	0.4556	0.081
Kaibab2	0.7137	0.1783	0.1958	0.259	0.3241	0.4566	0.3394	0.4949	0.5813	0.7191	0.3629	0.5564	0.5174	0.0636	0.2321	0.1733	0.4909	1	0.5476	0.3597	0.4843	0.477	0.3922	0.5808	0.5364	0.4672	0.0447	0.1658	0.1086	0.1236	0.2807	0.1942	0.2447	0.2652	0.3036	0.2956	0.1393	0.0925	0.379	0.2081
Coconino2	0.793	0.1765	0.1129	0.2279	0.2738	0.4797	0.3434	0.5406	0.6771	0.6488	0.4448	0.6817	0.4966	0.0322	0.3381	0.2824	0.5298	0.5476	1	0.4821	0.6042	0.6342	0.3841	0.4899	0.4725	0.5852	0.0359	0.1984	0.131	0.122	0.3829	0.2412	0.2171	0.2823	0.4586	0.5034	0.2216	0.0845	0.3742	0.1988
Kaibab	0.6591	0.2465	0.1748	0.3402	0.3765	0.3759	0.4288	0.4251	0.5347	0.4118	0.5573	0.5635	0.439	0.1497	0.2348	0.1717	0.4802	0.3597	0.4821	1	0.463	0.4899	0.4163	0.3134	0.3035	0.3281	0.1609	0.3687	0.209	0.2604	0.4983	0.4349	0.3596	0.4072	0.2714	0.344	0.1755	0.1065	0.3274	0.1479
Toroweap2	0.6851	0.1158	0.1624	0.3009	0.2574	0.4582	0.3578	0.4391	0.5631	0.614	0.3679	0.5344	0.5263	0.0285	0.3112	0.1828	0.3828	0.4843	0.6042	0.463	1	0.4939	0.3087	0.4619	0.4797	0.4442	0.031	0.1113	0.0713	0.0715	0.2099	0.1962	0.1737	0.1982	0.2009	0.2583	0.1003	0.1679	0.4278	0.4618
Coconino1	0.7081	0.1386	0.1891	0.3393	0.341	0.4368	0.3436	0.4233	0.5702	0.5845	0.3973	0.5839	0.4673	0.0353	0.3306	0.2712	0.4203	0.477	0.6342	0.4899	0.4939	1	0.3169	0.5337	0.4345	0.3925	0.033	0.186	0.1584	0.1189	0.4597	0.2679	0.1998	0.2811	0.5095	0.5057	0.174	0.1125	0.3468	0.2389
Toroweap1	0.5885	0.188	0.2553	0.3181	0.444	0.3208	0.4431	0.4582	0.5167	0.4395	0.3781	0.4916	0.433	0.2252	0.1216	0.1075	0.5224	0.3922	0.3841	0.4163	0.3087	0.3169	1	0.2762	0.2962	0.3943	0.2659	0.3766	0.3547	0.3933	0.2486	0.4238	0.4164	0.319	0.0724	0.1057	0.2815	0.124	0.302	0.1299
HB-01-10	0.6632	0.1274	0.1344	0.1544	0.2371	0.4421	0.364	0.4583	0.555	0.7355	0.2961	0.6011	0.4599	0.0425	0.2792	0.1711	0.4147	0.5808	0.4899	0.3134	0.4619	0.5337	0.2762	1	0.6687	0.3815	0.0247	0.1148	0.0889	0.1023	0.261	0.2146	0.2213	0.2503	0.2795	0.2906	0.1902	0.1551	0.3627	0.2647
HB-02-10	0.6257	0.1321	0.1159	0.1661	0.234	0.3888	0.297	0.4122	0.5513	0.668	0.3197	0.5222	0.4547	0.0351	0.2782	0.1739	0.4181	0.5364	0.4725	0.3035	0.4797	0.4345	0.2962	0.6687	1	0.409	0.019	0.1041	0.0604	0.0832	0.2519	0.2306	0.1924	0.2664	0.202	0.2287	0.111	0.1541	0.3675	0.2356
PHOS	0.6075	0.1504	0.192	0.2762	0.3005	0.3387	0.2464	0.5226	0.5493	0.5544	0.2869	0.5439	0.5068	0.085	0.2276	0.2027	0.4446	0.4672	0.5852	0.3281	0.4442	0.3925	0.3943	0.3815	0.409	1	0.0687	0.1699	0.1756	0.177	0.2588	0.2183	0.2776	0.27	0.2511	0.2472	0.2717	0.1683	0.347	0.2393
JCT-4946	0.1126	0.1292	0.0795	0.0856	0.1749	0.0782	0.1541	0.0812	0.1462	0.0428	0.129	0.0938	0.1024	0.1809	0.011	0.0221	0.1968	0.0447	0.0359	0.1609	0.031	0.033	0.2659	0.0247	0.019	0.0687	1	0.3392	0.4637	0.4514	0.1091	0.264	0.318	0.1314	0.00027379	0.0051	0.2932	0.0702	0.113	0.00022798
CC-I	0.3388	0.2398	0.1768	0.1087	0.2697	0.1599	0.2957	0.2552	0.3363	0.1492	0.4598	0.2995	0.2355	0.3752	0.0731	0.1436	0.4553	0.1658	0.1984	0.3687	0.1113	0.186	0.3766	0.1148	0.1041	0.1699	0.3392	1	0.4585	0.3785	0.3925	0.4377	0.4155	0.395	0.0818	0.1276	0.3082	0.0747	0.226	0.0022
CC-II	0.243	0.2649	0.1864	0.126	0.2451	0.1224	0.2658	0.1962	0.2812	0.1097	0.2157	0.2505	0.2044	0.2815	0.0704	0.1312	0.3297	0.1086	0.131	0.209	0.0713	0.1584	0.3547	0.0889	0.0604	0.1756	0.4637	0.4585	1	0.516	0.302	0.4095	0.4004	0.2982	0.0573	0.0836	0.4488	0.0937	0.1831	0.0014
CC-III	0.2611	0.2635	0.2353	0.1511	0.2866	0.1852	0.3434	0.2422	0.3138	0.1197	0.2349	0.2758	0.2486	0.2804	0.0569	0.1675	0.3748	0.1236	0.122	0.2604	0.0715	0.1189	0.3933	0.1023	0.0832	0.177	0.4514	0.3785	0.516	1	0.384	0.5127	0.5901	0.4855	0.0428	0.0784	0.5361	0.1596	0.276	0.0016
BrushCn	0.4991	0.3253	0.1722	0.1533	0.313	0.3312	0.3212	0.3549	0.439	0.2788	0.4717	0.5111	0.3749	0.2601	0.316	0.4868	0.566	0.2807	0.3829	0.4983	0.2099	0.4597	0.2486	0.261	0.2519	0.2588	0.1091	0.3925	0.302	0.384	1	0.542	0.4891	0.7818	0.4362	0.5935	0.3656	0.1089	0.3219	0.0254
Rader	0.4255	0.4132	0.2286	0.1335	0.3158	0.3083	0.4171	0.3497	0.3598	0.2519	0.4187	0.4309	0.3124	0.3648	0.1491	0.2824	0.4873	0.1942	0.2412	0.4349	0.1962	0.2679	0.4238	0.2146	0.2306	0.2183	0.264	0.4377	0.4095	0.5127	0.542	1	0.6578	0.6023	0.1196	0.263	0.4706	0.1292	0.308	0.0277
Yates	0.4004	0.3264	0.3591	0.2057	0.4072	0.2867	0.3847	0.3789	0.3757	0.2619	0.3711	0.3737	0.3278	0.4696	0.107	0.25	0.5506	0.2447	0.2171	0.3596	0.1737	0.1998	0.4164	0.2213	0.1924	0.2776	0.318	0.4155	0.4004	0.5901	0.4891	0.6578	1	0.6604	0.0896	0.1886	0.5693	0.1275	0.3572	0.017
Brushy	0.4365	0.3477	0.2749	0.1457	0.3113	0.2916	0.3292	0.3743	0.3859	0.2555	0.3661	0.4876	0.3647	0.429	0.2268	0.46	0.5869	0.2652	0.2823	0.4072	0.1982	0.2811	0.319	0.2503	0.2664	0.27	0.1314	0.395	0.2982	0.4855	0.7818	0.6023	0.6604	1	0.2416	0.3652	0.4686	0.162	0.3323	0.0158
O_M source	0.3779	0.0792	0.0725	0.1431	0.1573	0.3715	0.1007	0.2011	0.2992	0.288	0.1418	0.446	0.3326	0.0046	0.3024	0.2328	0.2793	0.3036	0.4586	0.2714	0.2009	0.5095	0.0724	0.2795	0.202	0.2511	0.00027379	0.0818	0.0573	0.0428	0.4362	0.1196	0.0896	0.2416	1	0.7307	0.1343	0.0182	0.1256	0.0745
Central Appalachian	0.4138	0.1428	0.0882	0.1282	0.1632	0.3693	0.1259	0.1982	0.2781	0.3067	0.2171	0.4575	0.2666	0.0141	0.3756	0.3751	0.3333	0.2956	0.5034	0.344	0.2583	0.5057	0.1057	0.2906	0.2287	0.2472	0.0051	0.1276	0.0836	0.0784	0.5935	0.263	0.1886	0.3652	0.7307	1	0.238	0.0284	0.1578	0.0371
N_Appalachian	0.3139	0.3345	0.335	0.1313	0.2332	0.2116	0.2935	0.275	0.3455	0.2193	0.1822	0.3927	0.2353	0.2777	0.1506	0.3481	0.4533	0.1393	0.2216	0.1755	0.1003	0.174	0.2815	0.1902	0.111	0.2717	0.2932	0.3082	0.4488	0.5361	0.3656	0.4706	0.5693	0.4686	0.1343	0.238	1	0.1411	0.2396	0.0037
NW Arctic	0.1824	0.0773	0.0948	0.0681	0.0794	0.1538	0.1536	0.1258	0.2432	0.1515	0.0789	0.1731	0.2191	0.0398	0.3252	0.0829	0.1686	0.0925	0.0845	0.1065	0.1679	0.1125	0.124	0.1551	0.1541	0.1683	0.0702	0.0747	0.0937	0.1596	0.1089	0.1292	0.1275	0.162	0.0182	0.0284	0.1411	1	0.5671	0.2745
NE.Arctic	0.5484	0.2348	0.2041	0.2035	0.2788	0.3306	0.438	0.4331	0.571	0.4376	0.4263	0.4365	0.4686	0.1261	0.3508	0.219	0.4556	0.379	0.3742	0.3274	0.4278	0.3468	0.302	0.3627	0.3675	0.347	0.113	0.226	0.1831	0.276	0.3219	0.308	0.3572	0.3323	0.1256	0.1578	0.2396	0.5671	1	0.2617
Sonora_	0.2844	0.003	0.0801	0.225	0.0967	0.2414	0.1384	0.2062	0.2578	0.3411	0.0589	0.2338	0.291	0.00049741	0.2111	0.021	0.081	0.2081	0.1988	0.1479	0.4618	0.2389	0.1299	0.2647	0.2356	0.2393	0.00022798	0.0022	0.0014	0.0016	0.0254	0.0277	0.017	0.0158	0.0745	0.0371	0.0037	0.2745	0.2617	1
KS	AZ Shelf 4	CO-PR-2-0	12CV50	10CVG	10CVR	10CVW	11WRB	11WRA	2QZ-272	SY-A	3PS-100	4PS-186	Prv	pk0125151	10-12-15-3	6-20-17-3	6-20-17-4	Kaibab2	Coconino2	Kaibab	Toroweap2	Coconino1	Toroweap1	HB-01-10	HB-02-10	PHOS	JCT-4946	CC-I	CC-II	CC-III	BrushCn	Rader	Yates	Brushy	O_M source	Central Appalachian	N_Appalachian	NW Arctic	NE.Arctic	Sonora_
AZ Shelf 4	0	0.2323	0.1606	0.1167	0.1445	0.1283	0.1193	0.0449	0.0372	0.1099	0.1599	0.0492	0.053	0.5007	0.2128	0.2526	0.1059	0.1196	0.0927	0.1254	0.1452	0.0978	0.1399	0.1394	0.1316	0.094	0.4311	0.2955	0.3489	0.2893	0.2926	0.2045	0.2161	0.2565	0.2653	0.324	0.2683	0.345	0.1614	0.3882
CO-PR-2-0	0.2323	0	0.1919	0.268	0.1556	0.3206	0.1819	0.2558	0.2272	0.3305	0.1158	0.2366	0.2274	0.3254	0.3448	0.1706	0.1744	0.3364	0.3167	0.1564	0.2921	0.323	0.1769	0.3639	0.3041	0.3016	0.2868	0.1327	0.1789	0.1972	0.1873	0.0861	0.1371	0.1367	0.436	0.3202	0.1207	0.3829	0.2773	0.5543
12CV50	0.1606	0.1919	0	0.1495	0.1052	0.2136	0.141	0.1775	0.1919	0.2445	0.1269	0.1428	0.1457	0.4166	0.2843	0.2647	0.113	0.2124	0.2157	0.1242	0.2703	0.2098	0.1343	0.2574	0.2758	0.2393	0.3619	0.2624	0.2983	0.2402	0.3144	0.1948	0.2135	0.2639	0.3413	0.3254	0.2836	0.4337	0.2604	0.4819
10CVG	0.1167	0.268	0.1495	0	0.1904	0.1239	0.1461	0.1249	0.1176	0.1777	0.2069	0.1642	0.1338	0.515	0.2651	0.3624	0.1949	0.1352	0.1338	0.1988	0.1712	0.1192	0.1373	0.188	0.2092	0.1763	0.4106	0.3449	0.3863	0.3236	0.4	0.2819	0.3009	0.3506	0.3624	0.42	0.3652	0.4127	0.2194	0.4041
10CVR	0.1445	0.1556	0.1052	0.1904	0	0.208	0.1222	0.1572	0.1686	0.2372	0.095	0.129	0.1377	0.4073	0.2972	0.2268	0.0965	0.21	0.2	0.0962	0.2765	0.2111	0.1346	0.2566	0.2686	0.2357	0.3205	0.2312	0.2751	0.2222	0.2644	0.1667	0.1856	0.2252	0.325	0.2738	0.2381	0.4513	0.255	0.4999
10CVW	0.1283	0.3206	0.2136	0.1239	0.208	0	0.1889	0.1263	0.1224	0.1239	0.2404	0.165	0.1198	0.5667	0.2209	0.3776	0.2068	0.0862	0.1402	0.2107	0.1554	0.1523	0.2132	0.1183	0.1312	0.1229	0.5039	0.3807	0.411	0.3566	0.3416	0.2872	0.3023	0.3179	0.2777	0.3461	0.3761	0.354	0.1677	0.3839
11WRB	0.1193	0.1819	0.141	0.1461	0.1222	0.1889	0	0.1265	0.0957	0.2062	0.0919	0.1238	0.1171	0.4043	0.2404	0.2325	0.083	0.1817	0.2011	0.1019	0.1871	0.1882	0.1058	0.2453	0.2234	0.1707	0.3257	0.2273	0.2737	0.2052	0.2794	0.1712	0.1849	0.2296	0.3135	0.3071	0.2477	0.3694	0.19	0.4217
11WRA	0.0449	0.2558	0.1775	0.1249	0.1572	0.1263	0.1265	0	0.0616	0.1286	0.1694	0.0633	0.0616	0.5084	0.2224	0.2732	0.1242	0.1144	0.1303	0.1396	0.1332	0.1085	0.1314	0.1583	0.1458	0.0931	0.4033	0.2947	0.334	0.2917	0.3014	0.2171	0.2335	0.2591	0.2855	0.3386	0.2774	0.3822	0.183	0.3909
2QZ-272	0.0372	0.2272	0.1919	0.1176	0.1686	0.1224	0.0957	0.0616	0	0.1322	0.1391	0.067	0.067	0.4769	0.1923	0.2662	0.1289	0.1152	0.1153	0.1456	0.1412	0.1138	0.1385	0.1656	0.138	0.09	0.4069	0.2717	0.3218	0.2656	0.3088	0.214	0.2369	0.2762	0.2836	0.3546	0.2923	0.3218	0.1446	0.3802
SY-A	0.1099	0.3305	0.2445	0.1777	0.2372	0.1239	0.2062	0.1286	0.1322	0	0.2652	0.1511	0.1376	0.6022	0.1871	0.3559	0.2023	0.0882	0.1293	0.2304	0.1136	0.172	0.2302	0.0482	0.0557	0.0591	0.5319	0.4003	0.448	0.3942	0.3937	0.299	0.3158	0.3608	0.3605	0.4164	0.3765	0.3263	0.1355	0.3545
3PS-100	0.1599	0.1158	0.1269	0.2069	0.095	0.2404	0.0919	0.1694	0.1391	0.2652	0	0.1753	0.161	0.3641	0.2873	0.1689	0.0994	0.2471	0.2454	0.0816	0.2228	0.2444	0.1126	0.2979	0.2452	0.2208	0.2954	0.1696	0.2266	0.2227	0.2149	0.1338	0.1493	0.1726	0.3789	0.2838	0.1709	0.3823	0.2019	0.4626
4PS-186	0.0492	0.2366	0.1428	0.1642	0.129	0.165	0.1238	0.0633	0.067	0.1511	0.1753	0	0.0822	0.5098	0.2109	0.2159	0.1001	0.1569	0.1071	0.1286	0.1574	0.1289	0.1478	0.1649	0.1601	0.1266	0.4428	0.3046	0.3524	0.2985	0.2647	0.2025	0.2191	0.2259	0.2429	0.3081	0.2376	0.3427	0.1611	0.3998
Prv	0.053	0.2274	0.1457	0.1338	0.1377	0.1198	0.1171	0.0616	0.067	0.1376	0.161	0.0822	0	0.4807	0.2317	0.2897	0.1353	0.1221	0.1197	0.1582	0.1507	0.134	0.1378	0.1795	0.1618	0.1229	0.4218	0.3024	0.3302	0.2811	0.327	0.2413	0.2603	0.2997	0.2592	0.3368	0.3153	0.3673	0.1866	0.3899
pk0125151	0.5007	0.3254	0.4166	0.515	0.4073	0.5667	0.4043	0.5084	0.4769	0.6022	0.3641	0.5098	0.4807	0	0.6202	0.4703	0.4301	0.5825	0.5849	0.4015	0.5602	0.5715	0.3983	0.6279	0.5862	0.5601	0.1854	0.2362	0.1913	0.2273	0.3999	0.3449	0.3042	0.3791	0.7115	0.6209	0.3386	0.5953	0.4956	0.7671
10-12-15-3	0.2128	0.3448	0.2843	0.2651	0.2972	0.2209	0.2404	0.2224	0.1923	0.1871	0.2873	0.2109	0.2317	0.6202	0	0.3123	0.2542	0.2121	0.2469	0.2396	0.1671	0.2227	0.3029	0.1828	0.1944	0.1791	0.543	0.4115	0.4672	0.4082	0.3643	0.3181	0.3292	0.3265	0.3373	0.4073	0.3458	0.1725	0.137	0.3193
6-20-17-3	0.2526	0.1706	0.2647	0.3624	0.2268	0.3776	0.2325	0.2732	0.2662	0.3559	0.1689	0.2159	0.2897	0.4703	0.3123	0	0.1833	0.3682	0.2913	0.1735	0.3454	0.2976	0.2552	0.3629	0.3596	0.3221	0.4199	0.2759	0.3273	0.2827	0.1213	0.1693	0.2074	0.1618	0.401	0.282	0.1483	0.4581	0.3368	0.6015
6-20-17-4	0.1059	0.1744	0.113	0.1949	0.0965	0.2068	0.083	0.1242	0.1289	0.2023	0.0994	0.1001	0.1353	0.4301	0.2542	0.1833	0	0.2062	0.1838	0.0823	0.2237	0.188	0.0877	0.2238	0.1997	0.1721	0.3494	0.2258	0.2787	0.2179	0.2382	0.1327	0.1427	0.191	0.2856	0.2706	0.1878	0.41	0.2208	0.4671
Kaibab2	0.1196	0.3364	0.2124	0.1352	0.21	0.0862	0.1817	0.1144	0.1152	0.0882	0.2471	0.1569	0.1221	0.5825	0.2121	0.3682	0.2062	0	0.1272	0.219	0.1632	0.1407	0.2037	0.0887	0.0962	0.1234	0.5054	0.3756	0.4348	0.3703	0.371	0.2975	0.3145	0.3492	0.3179	0.3741	0.3675	0.374	0.1845	0.4116
Coconino2	0.0927	0.3167	0.2157	0.1338	0.2	0.1402	0.2011	0.1303	0.1153	0.1293	0.2454	0.1071	0.1197	0.5849	0.2469	0.2913	0.1838	0.1272	0	0.1943	0.1606	0.0762	0.2251	0.138	0.1384	0.112	0.5078	0.3762	0.4276	0.3705	0.3014	0.2905	0.2961	0.2864	0.2793	0.3432	0.3349	0.3942	0.2023	0.4056
Kaibab	0.1254	0.1564	0.1242	0.1988	0.0962	0.2107	0.1019	0.1396	0.1456	0.2304	0.0816	0.1286	0.1582	0.4015	0.2396	0.1735	0.0823	0.219	0.1943	0	0.2072	0.207	0.1143	0.2365	0.2483	0.2154	0.3239	0.1962	0.2462	0.2039	0.2032	0.1154	0.1553	0.1662	0.3145	0.2536	0.1819	0.3689	0.2195	0.468
Toroweap2	0.1452	0.2921	0.2703	0.1712	0.2765	0.1554	0.1871	0.1332	0.1412	0.1136	0.2228	0.1574	0.1507	0.5602	0.1671	0.3454	0.2237	0.1632	0.1606	0.2072	0	0.1712	0.2107	0.1231	0.1173	0.087	0.493	0.3515	0.4125	0.3541	0.3872	0.2728	0.3219	0.3434	0.3598	0.4317	0.3482	0.306	0.1223	0.3121
Coconino1	0.0978	0.323	0.2098	0.1192	0.2111	0.1523	0.1882	0.1085	0.1138	0.172	0.2444	0.1289	0.134	0.5715	0.2227	0.2976	0.188	0.1407	0.0762	0.207	0.1712	0	0.2024	0.1827	0.2038	0.1606	0.4943	0.3665	0.4237	0.3653	0.299	0.2843	0.3052	0.2898	0.2628	0.3137	0.3391	0.3528	0.1704	0.413
Toroweap1	0.1399	0.1769	0.1343	0.1373	0.1346	0.2132	0.1058	0.1314	0.1385	0.2302	0.1126	0.1478	0.1378	0.3983	0.3029	0.2552	0.0877	0.2037	0.2251	0.1143	0.2107	0.2024	0	0.2592	0.2474	0.1948	0.3017	0.2342	0.2819	0.2293	0.2929	0.171	0.1943	0.2441	0.3285	0.3116	0.2581	0.4509	0.2582	0.4399
HB-01-10	0.1394	0.3639	0.2574	0.188	0.2566	0.1183	0.2453	0.1583	0.1656	0.0482	0.2979	0.1649	0.1795	0.6279	0.1828	0.3629	0.2238	0.0887	0.138	0.2365	0.1231	0.1827	0.2592	0	0.0843	0.0814	0.5508	0.4192	0.4802	0.4214	0.4027	0.3303	0.3349	0.3604	0.3774	0.4374	0.3649	0.3057	0.1515	0.3756
HB-02-10	0.1316	0.3041	0.2758	0.2092	0.2686	0.1312	0.2234	0.1458	0.138	0.0557	0.2452	0.1601	0.1618	0.5862	0.1944	0.3596	0.1997	0.0962	0.1384	0.2483	0.1173	0.2038	0.2474	0.0843	0	0.0733	0.5285	0.3834	0.4419	0.3928	0.4042	0.2971	0.3161	0.3609	0.3874	0.4416	0.3696	0.3336	0.158	0.3746
PHOS	0.094	0.3016	0.2393	0.1763	0.2357	0.1229	0.1707	0.0931	0.09	0.0591	0.2208	0.1266	0.1229	0.5601	0.1791	0.3221	0.1721	0.1234	0.112	0.2154	0.087	0.1606	0.1948	0.0814	0.0733	0	0.4897	0.3581	0.4056	0.3519	0.3737	0.2838	0.2804	0.3309	0.3461	0.4043	0.3431	0.3399	0.1407	0.3251
JCT-4946	0.4311	0.2868	0.3619	0.4106	0.3205	0.5039	0.3257	0.4033	0.4069	0.5319	0.2954	0.4428	0.4218	0.1854	0.543	0.4199	0.3494	0.5054	0.5078	0.3239	0.493	0.4943	0.3017	0.5508	0.5285	0.4897	0	0.1558	0.1332	0.1501	0.3375	0.2871	0.2271	0.3019	0.6288	0.5679	0.2901	0.4788	0.4233	0.6274
CC-I	0.2955	0.1327	0.2624	0.3449	0.2312	0.3807	0.2273	0.2947	0.2717	0.4003	0.1696	0.3046	0.3024	0.2362	0.4115	0.2759	0.2258	0.3756	0.3762	0.1962	0.3515	0.3665	0.2342	0.4192	0.3834	0.3581	0.1558	0	0.0855	0.0918	0.201	0.1556	0.1228	0.1703	0.4972	0.4227	0.1426	0.4826	0.3425	0.6023
CC-II	0.3489	0.1789	0.2983	0.3863	0.2751	0.411	0.2737	0.334	0.3218	0.448	0.2266	0.3524	0.3302	0.1913	0.4672	0.3273	0.2787	0.4348	0.4276	0.2462	0.4125	0.4237	0.2819	0.4802	0.4419	0.4056	0.1332	0.0855	0	0.1079	0.2473	0.1921	0.1802	0.2313	0.5568	0.4754	0.1981	0.4992	0.3891	0.6473
CC-III	0.2893	0.1972	0.2402	0.3236	0.2222	0.3566	0.2052	0.2917	0.2656	0.3942	0.2227	0.2985	0.2811	0.2273	0.4082	0.2827	0.2179	0.3703	0.3705	0.2039	0.3541	0.3653	0.2293	0.4214	0.3928	0.3519	0.1501	0.0918	0.1079	0	0.1899	0.1494	0.1045	0.1717	0.5012	0.4308	0.1501	0.468	0.3156	0.5734
BrushCn	0.2926	0.1873	0.3144	0.4	0.2644	0.3416	0.2794	0.3014	0.3088	0.3937	0.2149	0.2647	0.327	0.3999	0.3643	0.1213	0.2382	0.371	0.3014	0.2032	0.3872	0.299	0.2929	0.4027	0.4042	0.3737	0.3375	0.201	0.2473	0.1899	0	0.1761	0.1214	0.0908	0.3194	0.2477	0.142	0.5245	0.3859	0.6463
Rader	0.2045	0.0861	0.1948	0.2819	0.1667	0.2872	0.1712	0.2171	0.214	0.299	0.1338	0.2025	0.2413	0.3449	0.3181	0.1693	0.1327	0.2975	0.2905	0.1154	0.2728	0.2843	0.171	0.3303	0.2971	0.2838	0.2871	0.1556	0.1921	0.1494	0.1761	0	0.1102	0.1241	0.4069	0.3033	0.1309	0.4055	0.2703	0.5401
Yates	0.2161	0.1371	0.2135	0.3009	0.1856	0.3023	0.1849	0.2335	0.2369	0.3158	0.1493	0.2191	0.2603	0.3042	0.3292	0.2074	0.1427	0.3145	0.2961	0.1553	0.3219	0.3052	0.1943	0.3349	0.3161	0.2804	0.2271	0.1228	0.1802	0.1045	0.1214	0.1102	0	0.0964	0.4116	0.3509	0.1251	0.4868	0.3073	0.561
Brushy	0.2565	0.1367	0.2639	0.3506	0.2252	0.3179	0.2296	0.2591	0.2762	0.3608	0.1726	0.2259	0.2997	0.3791	0.3265	0.1618	0.191	0.3492	0.2864	0.1662	0.3434	0.2898	0.2441	0.3604	0.3609	0.3309	0.3019	0.1703	0.2313	0.1717	0.0908	0.1241	0.0964	0	0.3457	0.2893	0.1464	0.4834	0.34	0.6026
O_M source	0.2653	0.436	0.3413	0.3624	0.325	0.2777	0.3135	0.2855	0.2836	0.3605	0.3789	0.2429	0.2592	0.7115	0.3373	0.401	0.2856	0.3179	0.2793	0.3145	0.3598	0.2628	0.3285	0.3774	0.3874	0.3461	0.6288	0.4972	0.5568	0.5012	0.3194	0.4069	0.4116	0.3457	0	0.1908	0.4342	0.4964	0.3599	0.5993
Central Appalachian	0.324	0.3202	0.3254	0.42	0.2738	0.3461	0.3071	0.3386	0.3546	0.4164	0.2838	0.3081	0.3368	0.6209	0.4073	0.282	0.2706	0.3741	0.3432	0.2536	0.4317	0.3137	0.3116	0.4374	0.4416	0.4043	0.5679	0.4227	0.4754	0.4308	0.2477	0.3033	0.3509	0.2893	0.1908	0	0.3115	0.5645	0.42	0.6563
N_Appalachian	0.2683	0.1207	0.2836	0.3652	0.2381	0.3761	0.2477	0.2774	0.2923	0.3765	0.1709	0.2376	0.3153	0.3386	0.3458	0.1483	0.1878	0.3675	0.3349	0.1819	0.3482	0.3391	0.2581	0.3649	0.3696	0.3431	0.2901	0.1426	0.1981	0.1501	0.142	0.1309	0.1251	0.1464	0.4342	0.3115	0	0.4624	0.3449	0.6151
NW Arctic	0.345	0.3829	0.4337	0.4127	0.4513	0.354	0.3694	0.3822	0.3218	0.3263	0.3823	0.3427	0.3673	0.5953	0.1725	0.4581	0.41	0.374	0.3942	0.3689	0.306	0.3528	0.4509	0.3057	0.3336	0.3399	0.4788	0.4826	0.4992	0.468	0.5245	0.4055	0.4868	0.4834	0.4964	0.5645	0.4624	0	0.1995	0.1745
NE.Arctic	0.1614	0.2773	0.2604	0.2194	0.255	0.1677	0.19	0.183	0.1446	0.1355	0.2019	0.1611	0.1866	0.4956	0.137	0.3368	0.2208	0.1845	0.2023	0.2195	0.1223	0.1704	0.2582	0.1515	0.158	0.1407	0.4233	0.3425	0.3891	0.3156	0.3859	0.2703	0.3073	0.34	0.3599	0.42	0.3449	0.1995	0	0.2833
Sonora_	0.3882	0.5543	0.4819	0.4041	0.4999	0.3839	0.4217	0.3909	0.3802	0.3545	0.4626	0.3998	0.3899	0.7671	0.3193	0.6015	0.4671	0.4116	0.4056	0.468	0.3121	0.413	0.4399	0.3756	0.3746	0.3251	0.6274	0.6023	0.6473	0.5734	0.6463	0.5401	0.561	0.6026	0.5993	0.6563	0.6151	0.1745	0.2833	0
kde_like	AZ Shelf 4	CO-PR-2-0	12CV50	10CVG	10CVR	10CVW	11WRB	11WRA	2QZ-272	SY-A	3PS-100	4PS-186	Prv	pk0125151	10-12-15-3	6-20-17-3	6-20-17-4	Kaibab2	Coconino2	Kaibab	Toroweap2	Coconino1	Toroweap1	HB-01-10	HB-02-10	PHOS	JCT-4946	CC-I	CC-II	CC-III	BrushCn	Rader	Yates	Brushy	O_M source	Central Appalachian	N_Appalachian	NW Arctic	NE.Arctic	Sonora_
AZ Shelf 4	1	0.6935	0.5822	0.6449	0.7657	0.7256	0.788	0.8526	0.8578	0.8479	0.7793	0.869	0.808	0.4863	0.712	0.6863	0.8339	0.7918	0.8135	0.7886	0.806	0.8253	0.7714	0.8078	0.7685	0.811	0.5634	0.6728	0.6472	0.6546	0.6848	0.7248	0.7017	0.7052	0.4667	0.533	0.6303	0.6052	0.76	0.554
CO-PR-2-0	0.6935	1	0.5337	0.516	0.7364	0.6446	0.7462	0.7216	0.7092	0.5926	0.8035	0.6817	0.6929	0.5772	0.6195	0.6925	0.7784	0.6481	0.6475	0.7604	0.6811	0.632	0.6793	0.602	0.6545	0.6608	0.7007	0.7705	0.733	0.6957	0.668	0.8124	0.7423	0.6811	0.361	0.4659	0.6538	0.5888	0.6892	0.3664
12CV50	0.5822	0.5337	1	0.6052	0.6247	0.5207	0.5515	0.5646	0.5616	0.5653	0.5579	0.5664	0.6035	0.5383	0.4741	0.5398	0.5887	0.5653	0.5347	0.5413	0.5351	0.5541	0.5572	0.5327	0.5381	0.5505	0.45	0.5135	0.5184	0.5437	0.5253	0.5332	0.5352	0.5589	0.3162	0.3986	0.5491	0.4334	0.536	0.3867
10CVG	0.6449	0.516	0.6052	1	0.6194	0.4933	0.5715	0.6192	0.6122	0.5995	0.5718	0.614	0.5993	0.4309	0.507	0.4897	0.5987	0.5599	0.5696	0.5648	0.5878	0.6052	0.5923	0.5493	0.5277	0.5676	0.4679	0.5278	0.5085	0.5201	0.5138	0.541	0.5417	0.5383	0.3694	0.3858	0.477	0.4501	0.5565	0.4899
10CVR	0.7657	0.7364	0.6247	0.6194	1	0.7303	0.8301	0.7837	0.7741	0.6828	0.8206	0.7413	0.8184	0.582	0.5658	0.6224	0.8163	0.7537	0.6892	0.7992	0.6816	0.7274	0.8329	0.6599	0.6912	0.7164	0.6703	0.7519	0.7102	0.7588	0.6794	0.7715	0.8026	0.6923	0.422	0.4964	0.585	0.5622	0.7145	0.4786
10CVW	0.7256	0.6446	0.5207	0.4933	0.7303	1	0.7905	0.7303	0.7355	0.6974	0.7549	0.71	0.7961	0.4455	0.6508	0.6158	0.7279	0.8204	0.7577	0.7778	0.7392	0.7366	0.7376	0.7379	0.8202	0.7991	0.5301	0.6356	0.5698	0.6285	0.5916	0.7015	0.7261	0.6318	0.4444	0.5741	0.5641	0.6053	0.7137	0.518
11WRB	0.788	0.7462	0.5515	0.5715	0.8301	0.7905	1	0.8403	0.8084	0.6941	0.8707	0.7632	0.8239	0.5466	0.6219	0.6333	0.8442	0.7702	0.7475	0.8681	0.7584	0.7269	0.8822	0.7163	0.7791	0.8069	0.6879	0.7752	0.7153	0.7396	0.6222	0.7831	0.8127	0.6584	0.3511	0.4489	0.5877	0.6314	0.7776	0.4996
11WRA	0.8526	0.7216	0.5646	0.6192	0.7837	0.7303	0.8403	1	0.8639	0.7833	0.8121	0.8193	0.8277	0.4949	0.6582	0.6699	0.8658	0.8277	0.8129	0.8276	0.8288	0.7859	0.8133	0.7881	0.7801	0.8306	0.5941	0.7017	0.6651	0.6896	0.6617	0.7545	0.7386	0.6898	0.4294	0.4887	0.6164	0.598	0.7661	0.5492
2QZ-272	0.8578	0.7092	0.5616	0.6122	0.7741	0.7355	0.8084	0.8639	1	0.7729	0.7952	0.8202	0.8196	0.4904	0.6882	0.668	0.8209	0.7841	0.7938	0.8007	0.8117	0.767	0.7834	0.7859	0.7713	0.825	0.5817	0.6858	0.6595	0.6912	0.6588	0.7259	0.7152	0.6633	0.428	0.4842	0.6225	0.6424	0.7819	0.541
SY-A	0.8479	0.5926	0.5653	0.5995	0.6828	0.6974	0.6941	0.7833	0.7729	1	0.6724	0.8127	0.7817	0.3944	0.6937	0.6301	0.7532	0.7872	0.7639	0.68	0.784	0.7631	0.6913	0.8333	0.7712	0.778	0.4474	0.5555	0.5344	0.5461	0.5997	0.6087	0.5971	0.6368	0.473	0.5294	0.5621	0.5519	0.6912	0.5991
3PS-100	0.7793	0.8035	0.5579	0.5718	0.8206	0.7549	0.8707	0.8121	0.7952	0.6724	1	0.7603	0.7839	0.5544	0.6448	0.6469	0.8333	0.7401	0.7483	0.8476	0.7431	0.7153	0.7955	0.6814	0.7351	0.7791	0.7078	0.8151	0.76	0.7538	0.6563	0.8062	0.804	0.6832	0.3668	0.4746	0.618	0.5995	0.7524	0.4551
4PS-186	0.869	0.6817	0.5664	0.614	0.7413	0.71	0.7632	0.8193	0.8202	0.8127	0.7603	1	0.8146	0.4756	0.7481	0.7295	0.817	0.7594	0.8166	0.7742	0.7986	0.7918	0.7484	0.8064	0.7469	0.8143	0.546	0.6604	0.6336	0.6447	0.6974	0.7284	0.6996	0.7523	0.4858	0.5599	0.6463	0.6176	0.7356	0.5419
Prv	0.808	0.6929	0.6035	0.5993	0.8184	0.7961	0.8239	0.8277	0.8196	0.7817	0.7839	0.8146	1	0.5214	0.6579	0.6758	0.7999	0.8329	0.7559	0.7955	0.8157	0.7669	0.808	0.7714	0.8275	0.8348	0.5723	0.6756	0.6402	0.6711	0.6369	0.7332	0.7334	0.6756	0.4308	0.5326	0.5954	0.614	0.7407	0.5522
pk0125151	0.4863	0.5772	0.5383	0.4309	0.582	0.4455	0.5466	0.4949	0.4904	0.3944	0.5544	0.4756	0.5214	1	0.3509	0.4809	0.5461	0.4384	0.4061	0.5574	0.431	0.4334	0.5681	0.3826	0.4281	0.4388	0.6343	0.6457	0.6871	0.6568	0.5386	0.5894	0.6243	0.5807	0.2407	0.3387	0.5237	0.3622	0.454	0.2097
10-12-15-3	0.712	0.6195	0.4741	0.507	0.5658	0.6508	0.6219	0.6582	0.6882	0.6937	0.6448	0.7481	0.6579	0.3509	1	0.6703	0.6712	0.6521	0.7135	0.6597	0.7049	0.7245	0.5546	0.704	0.672	0.6934	0.4345	0.5499	0.5326	0.5104	0.6245	0.626	0.5505	0.6679	0.4878	0.5521	0.6116	0.7184	0.7146	0.5688
6-20-17-3	0.6863	0.6925	0.5398	0.4897	0.6224	0.6158	0.6333	0.6699	0.668	0.6301	0.6469	0.7295	0.6758	0.4809	0.6703	1	0.7279	0.622	0.7117	0.6858	0.6495	0.6984	0.6044	0.6557	0.6336	0.6473	0.5364	0.6539	0.6356	0.6065	0.7303	0.7082	0.6547	0.7309	0.5038	0.6215	0.7435	0.5411	0.6142	0.3813
6-20-17-4	0.8339	0.7784	0.5887	0.5987	0.8163	0.7279	0.8442	0.8658	0.8209	0.7532	0.8333	0.817	0.7999	0.5461	0.6712	0.7279	1	0.7888	0.7915	0.8201	0.7702	0.769	0.8332	0.7774	0.7487	0.7829	0.6474	0.7597	0.7208	0.7294	0.7261	0.8054	0.7965	0.7676	0.4261	0.5104	0.6646	0.5936	0.7511	0.4643
Kaibab2	0.7918	0.6481	0.5653	0.5599	0.7537	0.8204	0.7702	0.8277	0.7841	0.7872	0.7401	0.7594	0.8329	0.4384	0.6521	0.622	0.7888	1	0.7907	0.7553	0.7949	0.7709	0.7506	0.8234	0.8467	0.8422	0.5031	0.6232	0.5755	0.6121	0.617	0.6936	0.6862	0.648	0.4798	0.5571	0.5791	0.5721	0.6981	0.5471
Coconino2	0.8135	0.6475	0.5347	0.5696	0.6892	0.7577	0.7475	0.8129	0.7938	0.7639	0.7483	0.8166	0.7559	0.4061	0.7135	0.7117	0.7915	0.7907	1	0.7417	0.8192	0.8231	0.7347	0.8107	0.8153	0.8335	0.4979	0.6223	0.5786	0.5969	0.6652	0.6852	0.6644	0.6869	0.5119	0.6005	0.6426	0.5533	0.6931	0.5216
Kaibab	0.7886	0.7604	0.5413	0.5648	0.7992	0.7778	0.8681	0.8276	0.8007	0.68	0.8476	0.7742	0.7955	0.5574	0.6597	0.6858	0.8201	0.7553	0.7417	1	0.7467	0.7517	0.8203	0.7025	0.7256	0.7824	0.6802	0.803	0.7327	0.7199	0.6718	0.8534	0.8298	0.7166	0.4225	0.5134	0.656	0.6206	0.7516	0.4751
Toroweap2	0.806	0.6811	0.5351	0.5878	0.6816	0.7392	0.7584	0.8288	0.8117	0.784	0.7431	0.7986	0.8157	0.431	0.7049	0.6495	0.7702	0.7949	0.8192	0.7467	1	0.7709	0.7172	0.8231	0.8373	0.8318	0.5145	0.618	0.5772	0.5774	0.5802	0.6926	0.6421	0.6231	0.407	0.4933	0.6052	0.6194	0.7358	0.6307
Coconino1	0.8253	0.632	0.5541	0.6052	0.7274	0.7366	0.7269	0.7859	0.767	0.7631	0.7153	0.7918	0.7669	0.4334	0.7245	0.6984	0.769	0.7709	0.8231	0.7517	0.7709	1	0.6985	0.7896	0.7342	0.754	0.4868	0.6064	0.5817	0.5785	0.6888	0.6763	0.6461	0.6819	0.5802	0.6227	0.6169	0.5705	0.7077	0.568
Toroweap1	0.7714	0.6793	0.5572	0.5923	0.8329	0.7376	0.8822	0.8133	0.7834	0.6913	0.7955	0.7484	0.808	0.5681	0.5546	0.6044	0.8332	0.7506	0.7347	0.8203	0.7172	0.6985	1	0.7112	0.7567	0.7798	0.6895	0.7467	0.6951	0.7346	0.6135	0.7497	0.7971	0.6634	0.3397	0.4307	0.5544	0.592	0.7298	0.4923
HB-01-10	0.8078	0.602	0.5327	0.5493	0.6599	0.7379	0.7163	0.7881	0.7859	0.8333	0.6814	0.8064	0.7714	0.3826	0.704	0.6557	0.7774	0.8234	0.8107	0.7025	0.8231	0.7896	0.7112	1	0.8281	0.8284	0.4392	0.5647	0.5261	0.5353	0.6028	0.6353	0.619	0.6335	0.5052	0.5595	0.5843	0.581	0.6894	0.6026
HB-02-10	0.7685	0.6545	0.5381	0.5277	0.6912	0.8202	0.7791	0.7801	0.7713	0.7712	0.7351	0.7469	0.8275	0.4281	0.672	0.6336	0.7487	0.8467	0.8153	0.7256	0.8373	0.7342	0.7567	0.8281	1	0.8524	0.493	0.6007	0.5445	0.5694	0.5473	0.6701	0.651	0.5865	0.4028	0.5129	0.5643	0.6095	0.7112	0.5803
PHOS	0.811	0.6608	0.5505	0.5676	0.7164	0.7991	0.8069	0.8306	0.825	0.778	0.7791	0.8143	0.8348	0.4388	0.6934	0.6473	0.7829	0.8422	0.8335	0.7824	0.8318	0.754	0.7798	0.8284	0.8524	1	0.5211	0.6553	0.6046	0.6215	0.5954	0.7207	0.6944	0.6521	0.4332	0.5071	0.5905	0.6479	0.732	0.5808
JCT-4946	0.5634	0.7007	0.45	0.4679	0.6703	0.5301	0.6879	0.5941	0.5817	0.4474	0.7078	0.546	0.5723	0.6343	0.4345	0.5364	0.6474	0.5031	0.4979	0.6802	0.5145	0.4868	0.6895	0.4392	0.493	0.5211	1	0.8186	0.7973	0.7702	0.5767	0.7096	0.7445	0.6432	0.2326	0.3173	0.5277	0.5148	0.5795	0.3188
CC-I	0.6728	0.7705	0.5135	0.5278	0.7519	0.6356	0.7752	0.7017	0.6858	0.5555	0.8151	0.6604	0.6756	0.6457	0.5499	0.6539	0.7597	0.6232	0.6223	0.803	0.618	0.6064	0.7467	0.5647	0.6007	0.6553	0.8186	1	0.8668	0.8241	0.6966	0.8333	0.851	0.7366	0.363	0.4709	0.6257	0.527	0.6554	0.3467
CC-II	0.6472	0.733	0.5184	0.5085	0.7102	0.5698	0.7153	0.6651	0.6595	0.5344	0.76	0.6336	0.6402	0.6871	0.5326	0.6356	0.7208	0.5755	0.5786	0.7327	0.5772	0.5817	0.6951	0.5261	0.5445	0.6046	0.7973	0.8668	1	0.8323	0.7039	0.7685	0.7823	0.7437	0.3481	0.4475	0.6116	0.4992	0.616	0.3364
CC-III	0.6546	0.6957	0.5437	0.5201	0.7588	0.6285	0.7396	0.6896	0.6912	0.5461	0.7538	0.6447	0.6711	0.6568	0.5104	0.6065	0.7294	0.6121	0.5969	0.7199	0.5774	0.5785	0.7346	0.5353	0.5694	0.6215	0.7702	0.8241	0.8323	1	0.6865	0.7754	0.8186	0.7728	0.3361	0.4371	0.6165	0.5293	0.6513	0.3509
BrushCn	0.6848	0.668	0.5253	0.5138	0.6794	0.5916	0.6222	0.6617	0.6588	0.5997	0.6563	0.6974	0.6369	0.5386	0.6245	0.7303	0.7261	0.617	0.6652	0.6718	0.5802	0.6888	0.6135	0.6028	0.5473	0.5954	0.5767	0.6966	0.7039	0.6865	1	0.6936	0.7071	0.798	0.59	0.6925	0.6736	0.4704	0.5861	0.3393
Rader	0.7248	0.8124	0.5332	0.541	0.7715	0.7015	0.7831	0.7545	0.7259	0.6087	0.8062	0.7284	0.7332	0.5894	0.626	0.7082	0.8054	0.6936	0.6852	0.8534	0.6926	0.6763	0.7497	0.6353	0.6701	0.7207	0.7096	0.8333	0.7685	0.7754	0.6936	1	0.8608	0.7674	0.4057	0.5105	0.6844	0.5982	0.6931	0.3987
Yates	0.7017	0.7423	0.5352	0.5417	0.8026	0.7261	0.8127	0.7386	0.7152	0.5971	0.804	0.6996	0.7334	0.6243	0.5505	0.6547	0.7965	0.6862	0.6644	0.8298	0.6421	0.6461	0.7971	0.619	0.651	0.6944	0.7445	0.851	0.7823	0.8186	0.7071	0.8608	1	0.7694	0.3962	0.511	0.6317	0.5329	0.681	0.3737
Brushy	0.7052	0.6811	0.5589	0.5383	0.6923	0.6318	0.6584	0.6898	0.6633	0.6368	0.6832	0.7523	0.6756	0.5807	0.6679	0.7309	0.7676	0.648	0.6869	0.7166	0.6231	0.6819	0.6634	0.6335	0.5865	0.6521	0.6432	0.7366	0.7437	0.7728	0.798	0.7674	0.7694	1	0.4873	0.6071	0.7053	0.5128	0.5957	0.3641
O_M source	0.4667	0.361	0.3162	0.3694	0.422	0.4444	0.3511	0.4294	0.428	0.473	0.3668	0.4858	0.4308	0.2407	0.4878	0.5038	0.4261	0.4798	0.5119	0.4225	0.407	0.5802	0.3397	0.5052	0.4028	0.4332	0.2326	0.363	0.3481	0.3361	0.59	0.4057	0.3962	0.4873	1	0.7149	0.4548	0.3048	0.3654	0.3703
Central Appalachian	0.533	0.4659	0.3986	0.3858	0.4964	0.5741	0.4489	0.4887	0.4842	0.5294	0.4746	0.5599	0.5326	0.3387	0.5521	0.6215	0.5104	0.5571	0.6005	0.5134	0.4933	0.6227	0.4307	0.5595	0.5129	0.5071	0.3173	0.4709	0.4475	0.4371	0.6925	0.5105	0.511	0.6071	0.7149	1	0.5755	0.3413	0.4275	0.3085
N_Appalachian	0.6303	0.6538	0.5491	0.477	0.585	0.5641	0.5877	0.6164	0.6225	0.5621	0.618	0.6463	0.5954	0.5237	0.6116	0.7435	0.6646	0.5791	0.6426	0.656	0.6052	0.6169	0.5544	0.5843	0.5643	0.5905	0.5277	0.6257	0.6116	0.6165	0.6736	0.6844	0.6317	0.7053	0.4548	0.5755	1	0.4991	0.5727	0.3453
NW Arctic	0.6052	0.5888	0.4334	0.4501	0.5622	0.6053	0.6314	0.598	0.6424	0.5519	0.5995	0.6176	0.614	0.3622	0.7184	0.5411	0.5936	0.5721	0.5533	0.6206	0.6194	0.5705	0.592	0.581	0.6095	0.6479	0.5148	0.527	0.4992	0.5293	0.4704	0.5982	0.5329	0.5128	0.3048	0.3413	0.4991	1	0.7424	0.5781
NE.Arctic	0.76	0.6892	0.536	0.5565	0.7145	0.7137	0.7776	0.7661	0.7819	0.6912	0.7524	0.7356	0.7407	0.454	0.7146	0.6142	0.7511	0.6981	0.6931	0.7516	0.7358	0.7077	0.7298	0.6894	0.7112	0.732	0.5795	0.6554	0.616	0.6513	0.5861	0.6931	0.681	0.5957	0.3654	0.4275	0.5727	0.7424	1	0.5539
Sonora_	0.554	0.3664	0.3867	0.4899	0.4786	0.518	0.4996	0.5492	0.541	0.5991	0.4551	0.5419	0.5522	0.2097	0.5688	0.3813	0.4643	0.5471	0.5216	0.4751	0.6307	0.568	0.4923	0.6026	0.5803	0.5808	0.3188	0.3467	0.3364	0.3509	0.3393	0.3987	0.3737	0.3641	0.3703	0.3085	0.3453	0.5781	0.5539	1
