# Supplementary material
Source: publisher figshare collection journal article supplement (https://gsapubs.figshare.com/ndownloader/files/23319257)
Supplement: Supplementary file 1 [file 23319257 › FileDR7. DZ_Locations and Stats tables.xlsx]

## Sheet: 0_Individual_List
Sample	Lat	Lon	Name	Age	Zone	Ref	KS	Like_kde	X_pdp
ref	0	0	0	0	0	0	1	0	0
AZShelf0	0	0	0	0	0	0	0	1	1
BC05	38.6585	-105.809	Leadville_LS	Missippian	Lower	This study	0.4963	0.4097	0.1298
06GC149	36.596	-111.768	Surprise_Canyon	Mississippian	upper	Gehrels_2011	0.2982	0.6712	0.4531
Surprise_Cyn2	36.5869	-111.782	Surprise_Canyon	Mississippian	upper	Gehrels_2011	0.1529	0.8107	0.8706
SurpriseC_Cngl	36.0263	-111.98	Surprise_Canyon	Mississippian	upper	Gehrels_2011	0.0601	0.9083	0.9555
Princeton	37.3961	-81.1315	Princeton_Fm	Chesterian	Late	Park_2010	0.2811	0.6515	0.7294
Bluestone	37.7699	-81.0905	Bluestone_Fm	Chesterian	Late	Park_2010	0.2503	0.6625	0.7362
24PL09	44.3205	-114.55	Salmon_River_Assemblage	Mississippian	Lower	Beranek_2016	0.8528	0.1303	0.0003
10JM94	43.6192	-113.867	Argosy_Creek_Fm	Mississippian	lower	Beranek_2016	0.7843	0.2323	0.0073
40JM94	43.6192	-113.867	Argosy_Creek_Fm	Mississippian	Lower	Beranek_2016	0.8549	0.1948	0.001
05PL15	43.8632	-114.261	Argosy_Creek_Fm	Mississippian	lower	Beranek_2016	0.8358	0.1819	0.0002
09LB04	43.8621	-114.308	Little_Cooper_Fm	Mississippian	Lower	Beranek_2016	0.7917	0.2463	0.0048
Hinton	37.7788	-80.8925	Hinton_fm	Mississipian		Park 2010	0.084	0.7696	0.6813
Mauch_Chunk	40.0402	-78.1393	Mauch_Chunk_Fm	Mississipian		Park 2010	0.2432	0.733	0.7309
KY-21-SG	37.1572	-82.6376	Stoney Gap	Mississipian	upper	Thomas et al., 2017	0.0551	0.8134	0.8514
Tonka	40.725	-116.021	Tonka_Fm	Mississippian		Gehrels_2000	0.83	0.1844	0.0002
Stanley	34.3231	-93.8448	Stanley Gp	Mississippian		McGuire, 2017	0.406	0.4619	0.1059
Hot_spring	34.5686	-93.0189	Hotspring Member, Stanley Gp	Mississippian		McGuire, 2017	0.1602	0.7458	0.6945
09-CM-699	36.5154	-117.702	Mexican Spring Formation	Mississippian	0	Attia et al., 2018	0.2104	0.7305	0.6057
O_M source	33.4716	-94.1579	0	0	0	0	0.1636	0.5881	0.5881
Central_App_Crys	35.8682	-81.0818	0	0	0	0	0.2239	0.7053	0.7547
N_Appalachian	45.1842	-69.1996	0	0	0	0	0.3038	0.6582	0.326
NW_Arctic	50.9438	-101.213	0	0	0	0	0.4177	0.5405	0.136
NE_Arctic	50.9438	-100.213	0	0	0	0	0.2221	0.646	0.3959
Sonora	29.9426	-113.133	0	0	0	0	0.4536	0.5127	0.1931

## Sheet: 1_individual_List
Sample	Lat	Lon	Name	Age	Zone	Ref	KS	Like_kde	X_pdp
ref	0	0	0	0	0	0	1	0	0
AZShelf1	0	0	0	0	0	0	0	1	1
MS11	38.8584	-104.924	Fountain	Pennsylvanian	Middle	0	0.2813	0.6053	0.3482
MS10	38.8584	-104.924	Fountain	Pennsylvanian	Lower	This study	0.36	0.5103	0.2495
MS01	38.8627	-104.915	Glen Eyrie	Atokan	Lower	This study	0.1722	0.5958	0.3708
MSGE313	38.8638	-104.916	Glen Eyrie	Atokan		Siddoway, 2014	0.207	0.3899	0.1917
BC01	38.6588	-105.808	Kerber Formation	Pennslyvian	Lower (Atokan?)	This study	0.144	0.6818	0.4595
BC02	38.6615	-105.805	Sharpsdale Fm	Morrowan	0	This study	0.4396	0.2776	0.1927
CC01	38.83	-106.854	Minturn and Belden (most likely Belden)	Morrowan	Lower	This study	0.2452	0.296	0.1516
ML01	37.7506	-107.684	Molas	Atokan	Mid-Lower Pen	This study	0.3924	0.5909	0.2244
MP-DZ1	37.7423	-107.687	Molas	Atokan		Nair 2018	0.5404	0.4756	0.1234
1QZ19	33.62	-114.015	Basal Supai Fm	Pennsylvanian	Basal	This study	0.0452	0.8913	0.9289
SY-D	34.8847	-112.064	Manakacha?	Atokan	0	This study	0.0485	0.8951	0.9507
Tumbling Run	40.8477	-76.0547	Tumbling Run Mbr, Pottsville Fm	Morrowan	0	Becker 2005	0.5525	0.497	0.0482
Pottsville Fm	40.1145	-78.2182	Pottsville Fm	Morrowan	0	Becker 2005	0.5657	0.4345	0.1156
Pocohontas	37.2938	-81.2046	Pocohontas Fm	Morrowan	0	Becker 2005	0.6126	0.3452	0.0763
Lee	36.9162	-82.6648	Lee Fm	Morrowan	0	Becker 2005	0.2424	0.6985	0.239
Racoon	34.3451	-85.2968	Racoon Mt Fm	Morrowan	0	Becker 2005	0.447	0.5379	0.1357
Montevallo	33.0911	-86.9726	Montevallo Coal Zone, Pottsville Fm	Morrowan	0	Becker 2005	0.4907	0.4635	0.1446
Sewanee	35.7161	-84.9243	Sewanee_Congl.	Pennsylvanian	lower	Thomas_2004	0.4395	0.5705	0.1651
KY-18-CB	38.2904	-83.0877	Corbin	Pennsylvanian	Lower	Thomas et al., 2017	0.3182	0.6558	0.4697
VA-1-GN	37.1235	-82.6112	Grundy Norton	Pennsylvanian	Lower	Thomas et al., 2017	0.5708	0.4104	0.1431
OH-4-SN	41.6663	-81.0395	Sharon	Pennsylvanian	lower	Thomas et al., 2017	0.5305	0.4699	0.1861
OH-1-SS	39.012	-82.7394	Sharon	Pennsylvanian	lower	Thomas et al., 2017	0.5142	0.4693	0.0935
Watahomigi	36.0779	-112.092	Watamomigi, Supai Fm	Morrowan	0	Gehrels 2011	0.1672	0.8034	0.6787
Manakacha1	36.6421	-111.763	Manakacha, Supai Fm	Atokan	0	Gehrels 2011	0.069	0.8322	0.8439
BCRA-01-10	45.042	-108.252	Amsden_Formation	Pennsyvlanian	Lower	May_2013	0.476	0.5111	0.1728
MB1-3	36.0334	-93.6724	Middle Boyd Sandstone	Morrowan	0	Buratowski, 2014	0.301	0.6457	0.2693
MB2-4	35.9411	-93.2558	Middle Boyd Sandstone	Morrowan	0	Buratowski, 2014	0.3427	0.624	0.3261
MB2-2	35.8754	-93.0457	Middle Boyd Sandstone	Morrowan	0	Buratowski, 2014	0.3195	0.6256	0.2942
MB2-3	35.724	-93.0249	Middle Boyd Sandstone	Morrowan	0	Buratowski, 2014	0.211	0.7297	0.4317
MB2-5	36.0547	-93.3588	Middle Boyd Sandstone	Morrowan	0	Buratowski, 2014	0.3317	0.6411	0.3065
MB2-1	36.1778	-93.2071	Middle Boyd Sandstone	Morrowan	0	Buratowski, 2014	0.4251	0.5576	0.3184
MB1-2	35.997	-93.4211	Middle Boyd Sandstone	Morrowan	0	Buratowski, 2014	0.3221	0.6263	0.2701
MB1-1	35.9283	-93.3899	Middle Boyd Sandstone	Morrowan	0	Buratowski, 2014	0.3891	0.5863	0.1992
16	34.8591	-95.3549	Atoka Fm	Atokan	0	Sharrah, 2006	0.3634	0.6363	0.3236
23	34.7583	-95.4468	Spiro Mbr, Atoka Fm	Atokan	0	Sharrah, 2006	0.3278	0.6556	0.3992
29	34.6265	-95.9258	Atoka Fm	Atokan	0	Sharrah, 2006	0.3562	0.6276	0.2935
38	34.8897	-95.3158	Spiro Mbr, Atoka Fm	Atokan	0	Sharrah, 2006	0.3332	0.6594	0.3396
48	34.7569	-95.4373	Atoka Fm	Atokan	0	Sharrah, 2006	0.2533	0.7064	0.4835
49	34.8842	-95.3183	Atoka Fm	Atokan	0	Sharrah, 2006	0.3357	0.6475	0.2117
50	34.7607	-95.4355	Atoka Fm	Atokan	0	Sharrah, 2006	0.2784	0.6741	0.3591
46-1	35.0049	-92.0705	Atoka Fm	Atokan	0	Sharrah, 2006	0.3098	0.6778	0.4414
46-2	35.0048	-92.0707	Atoka Fm	Atokan	0	Sharrah, 2006	0.3603	0.5897	0.261
IB_AD	40.4914	-90.3677	Upper Tradewater Fm	Desmoinesian	0	Kissock, 2016	0.4353	0.5808	0.2414
IB_M1	41.4342	-90.9403	Caseyville Fm	Morrowan	0	Kissock, 2016	0.2871	0.6829	0.3983
IB_M2	41.4638	-90.5708	Caseyville Fm	Morrowan	0	Kissock, 2016	0.619	0.397	0.0865
FCB_AD	40.613	-92.627	Kalo Fm	Desmoinesian	0	Kissock, 2016	0.4556	0.5611	0.2835
FCB_A2	40.613	-92.627	Kilbourn Fm	Atokan	0	Kissock, 2016	0.3448	0.6498	0.3951
FCB_A1	41.6772	-91.5315	Kilbourn Fm	Atokan	0	Kissock, 2016	0.355	0.5235	0.1959
S3	31.1377	-98.5795	Big Saline Fm	Atokan	0	Alsalem, 2017	0.4068	0.59	0.2624
O_M source	33.4716	-94.1579	0	0	0	0	0.4643	0.4139	0.1435
Central_App_Crys	35.8682	-81.0818	0	0	0	0	0.5181	0.4556	0.1556
N_Appalachian	45.1842	-69.1996	0	0	0	0	0.4673	0.5095	0.116
NW_Arctic	50.9438	-101.213	0	0	0	0	0.2959	0.6056	0.2126
NE_Arctic	50.9438	-100.213	0	0	0	0	0.1562	0.6935	0.4465
Sonora	29.9426	-113.133	0	0	0	0	0.2902	0.6454	0.4225

## Sheet: 2_individual_List
Sample	Lat	Lon	Name	Age	Zone	Ref	KS	Like_kde	X_pdp
ref	0	0	0	0	0	0	1	0	0
AZShelf2	0	0	0	0	0	0	0	1	1
MS04	38.8511	-104.885	Upper Fountain	Pennsylvanian	Upper	This study	0.7757	0.1692	0.1263
MS05	38.8467	-104.89	Upper Fountain	Pennsylvanian	Upper	This study	0.7443	0.1945	0.123
MS06	38.8462	-104.89	Upper Fountain	Pennsylvanian	Upper	This study	0.569	0.2442	0.1655
MC05	39.8847	-107.767	Minturn Fm	Desmoinesian	0	This study	0.2474	0.4276	0.2456
GS01	39.5317	-107.332	Eagle Valley Fm	Desmoinesian	0	This study	0.2297	0.5775	0.3167
GS09	39.5306	-107.336	Eagle Valley Fm	Desmoinesian	0	This study	0.1364	0.7758	0.7347
MC17	39.9144	-107.777	Minturn Fm	Desmoinesian	0	This study	0.0825	0.8002	0.7644
GS11	39.5037	-107.299	Maroon Fm	Missourian	0	This study	0.2725	0.3749	0.1503
MC20	39.9145	-107.777	Maroon Fm	Missourian	0	This study	0.1392	0.7505	0.6089
GS24	39.5059	-107.298	Maroon Fm	Missourian	0	This study	0.3157	0.2349	0.0918
V18	39.59	-106.342	Minturn Fm	Desmoinesian	0	This study	0.5434	0.3817	0.1818
V20	39.5859	-106.334	Minturn Fm	Desmoinesian	0	This study	0.5742	0.359	0.2003
EC01	39.6656	-106.831	Eagle Valley Evaporite	Desmoinesian	0	This study	0.2214	0.5288	0.2955
RC01	39.6834	-106.773	Eagle Valley Fm	Desmoinesian	0	This study	0.5393	0.2986	0.1528
RC19	39.6877	-106.767	Eagle Valley Fm	Desmoinesian	0	This study	0.1424	0.7512	0.5378
V10	39.5945	-106.338	Minturn Fm	Desmoinesian	0	This study	0.2173	0.7222	0.5426
V01	39.6058	-106.323	Minturn	Desmoinesian	0	This study	0.5354	0.2531	0.0978
V22	39.6486	-106.401	Maroon Fm	Missourian	0	This study	0.5948	0.2521	0.1025
V25	39.65	-106.403	Maroon Fm	Missourian	0	This study	0.5727	0.2398	0.0824
DMR01	37.6337	-107.814	Rico	Virgilian	0	This study	0.2987	0.2692	0.1034
LC01	37.715	-107.755	Honaker Trail	Missourian	0	This study	0.2975	0.2056	0.0916
SP01	37.6199	-107.814	Pinkerton Trail-Hermosa	Des Moinesian	Mid Pen	This study	0.3314	0.2551	0.1191
CF02	38.0234	-107.655	Hermosa	Pennsylvanian	Mid-Upper	This study	0.2928	0.254	0.1122
HT02	37.1838	-109.961	Paradox Fm	Desmonesian	0	This study	0.4388	0.5101	0.1484
HT14	37.1889	-109.957	Paradox Fm	Desmonesian	0	This study	0.108	0.7533	0.4003
HT04	37.1881	-109.954	Lower Honaker Trail	Missourian	0	This study	0.1281	0.7958	0.7136
HT20	37.1881	-109.954	Honaker Trail	Missourian	0	This study	0.0844	0.7591	0.7177
HT24	37.1888	-109.952	Honaker Trail	Missourian	0	This study	0.1939	0.7225	0.5862
KA03	38.4971	-109.652	Honaker Trail	Missourian	0	This study	0.1745	0.5429	0.2486
MP-DZ2	37.7433	-107.688	Hermosa	Desmoinesian	0	Nair 2018	0.2127	0.5937	0.4298
DryCreek	34.9433	-111.8	Supai	Atokan-Missourian	0	Soreghan 2007	0.2155	0.6549	0.2611
Pedreg	31.5	-110	Horquilla	Desmoinesian	0	Soreghan 2002	0.1001	0.7279	0.4735
5PS-42	34.3686	-111.394	Naco	Desmoinesian?	0	This study	0.0372	0.8973	0.9411
5PS-58	34.3686	-111.394	Naco	Missourian?	0	This study	0.0433	0.8802	0.9153
5PS-82	34.3692	-111.394	Naco	Virgilian?	0	This study	0.06	0.8812	0.9143
1WM-302	31.7723	-110.385	Horquilla	Virgilian?	0	This study	0.1894	0.7379	0.6636
1PL-534	33.1919	-110.662	Horquilla?	Virgilian?	0	This study	0.1112	0.7831	0.687
KC-2	36.5229	-117.81	Keeler Canyon, lower Salt Tram member	Virgilian	0	This study	0.2883	0.6676	0.4329
Z1	30.2102	-103.187	Haymond Fm	Pennsylvanian	Middle	Gleason 2007	0.2854	0.6801	0.335
Z4	30.4827	-102.852	Haymond Fm	Pennsylvanian	Middle	Gleason 2007	0.3068	0.6516	0.3637
OK-1-VN	34.4807	-97.0376	Vanoss Conglomerate	Pennsylvanian	Upper	Thomas 2014	0.3909	0.5293	0.0895
OK-2-V2	34.4915	-97.035	Vanoss Conglomerate	Pennsylvanian	Upper	Thomas 2014	0.3518	0.5183	0.1234
01PL12	43.4671	-114.2	Hailey Mmb; Wood River Fm	Pennsylvanian	Middle	Link 2015	0.1696	0.6858	0.3229
04TD10	43.7357	-114.194	Eagle Creek Mbr., Wood River Fm.	Virgilian to Wolfcampian	0	Link 2015	0.1156	0.826	0.6578
14TD10	43.7027	-114.194	Eagle Creek Mbr., Wood River Fm.	Virgilian to Wolfcampian	0	Link 2015	0.1204	0.7989	0.628
ECS-13-2	42.7414	-108.821	Tensleep Ss., Sinks Cyn., WY	Pennsylvanian	Upper	Link 2015	0.1706	0.7655	0.6835
ECS-13-4	40.9318	-109.775	Weber Ss., Sheep Ck., UT	Pennsylvanian	Upper	Link 2015	0.0918	0.8031	0.7054
ECS-13-5	40.8308	-108.735	Weber Ss., Irish Cyn., CO	Pennsylvanian	Upper	Link 2015	0.1358	0.788	0.627
UT62	40.054	-111.558	Oquirrh Sandstone	Pennsylvanian	Middle	Lawton 2010	0.0846	0.7966	0.6932
Cross_Mtn	36.5501	-83.8422	Cross_Mtn_Fm	Pennsylvanian	middle	Thomas_2004	0.4239	0.5854	0.1451
KY-19-PR7	38.3484	-82.6094	Princess No 7 coal	Pennsylvanian	middle	Thomas et al., 2017	0.4809	0.5177	0.3102
B_Wescogame	36.6681	-111.74	Wescogame	Virgilian	0	Gehrels 2011	0.0877	0.7703	0.6969
Battle	39.7517	-115.85	Battle_Formation	Pennsylvanian	middle	Gehrels_2000	0.6922	0.2926	0.0363
07-CM-001	44.504	-109.136	Tensleep_Formation	Lower Penn-Wolfcamp	0	May_2013	0.1193	0.7897	0.7359
07-BC-001	45.021	-108.251	Tensleep_Formation	Lower Penn-Wolfcamp	0	May_2013	0.1466	0.7943	0.6939
07-BHU-001	44.871	-108.069	Tensleep_Formation	Lower Penn-Wolfcamp	0	May_2013	0.1062	0.7939	0.709
quad1	45.4387	-112.565	Quadrant Formation	Pennsylvanian	upper	This study	0.1642	0.7154	0.4847
Spray_Lakes	50.8078	-115.274	Spray_Lakes_Gp	Pennsyvanian	0	Gehrels_1998	0.1322	0.7744	0.5902
IB_D1	41.4346	-90.942	Upper Tradewater Fm	Desmoinesian	0	Kissock, 2016	0.576	0.3943	0.0706
IB_D3	41.1939	-88.903	Carbondale Fm	Desmoinesian	0	Kissock, 2016	0.6088	0.4013	0.1438
IB_D2	41.4686	-90.0808	Upper Tradewater Fm	Desmoinesian	0	Kissock, 2016	0.6101	0.3789	0.1289
IB_D4	40.6375	-89.6542	Shelburn Fm	Desmoinesian	0	Kissock, 2016	0.5792	0.4166	0.1796
FCB_D1	41.3668	-92.9891	Floris Fm	Desmoinesian	0	Kissock, 2016	0.5238	0.4644	0.262
FCB_D2	41.3893	-93.0341	Floris Fm	Desmoinesian	0	Kissock, 2016	0.3105	0.6837	0.5394
FCB_D3	42.3929	-94.0808	Floris Fm	Desmoinesian	0	Kissock, 2016	0.4936	0.5106	0.263
FCB_D4	41.9828	-93.8933	Vertegris	Desmoinesian	0	Kissock, 2016	0.5718	0.3987	0.0122
S4	32.705	-98.0688	Grindstone Creek Fm. (Dobbs Valley)	Desmoinesian	0	Alsalem, 2017	0.2986	0.6369	0.2397
S5	32.7554	-98.0562	Mineral Wells Fm (Brazos River)	Desmoinesian	upper	Alsalem, 2017	0.4461	0.5565	0.1491
S6	32.7828	-98.1802	Mineral Wells Fm (Lake Pinto)	Desmoinesian-Missourian	0	Alsalem, 2017	0.4484	0.5654	0.1238
S7	32.7679	-98.3125	Turkey Creek	Missorian	0	Alsalem, 2017	0.4314	0.5473	0.2169
S8	32.7529	-98.5197	Colony Creek Shale	Missorian	0	Alsalem, 2017	0.4908	0.4874	0.084
O_M source	33.4716	-94.1579	0	0	0	0	0.4176	0.4726	0.2726
Central_App_Crys	35.8682	-81.0818	0	0	0	0	0.4707	0.5217	0.296
N_Appalachian	45.1842	-69.1996	0	0	0	0	0.4367	0.5282	0.1416
NW_Arctic	50.9438	-101.213	0	0	0	0	0.2955	0.5894	0.242
NE_Arctic	50.9438	-100.213	0	0	0	0	0.1677	0.6952	0.4765
Sonora	29.9426	-113.133	0	0	0	0	0.2974	0.6206	0.4233

## Sheet: 3_individual_List
Sample	Lat	Lon	Name	Age	Zone	Ref	KS	Like_kde	X_pdp
ref	0	0	0	0	0	0	1	0	0
AZShelf3	0	0	0	0	0	0	0	1	1
MS07	38.8516	-104.877	Lyons (Ingleside of Sweet et al. 2015)	Wolfcampian	0	This study	0.2204	0.736	0.5298
OC2-8	40.763	-105.18	lower Ingleside	Wolfcampian	0	Nair 2018	0.2594	0.7006	0.3642
OC56	40.7642	-105.177	upper Ingleside	Wolfcampian	0	Nair 2018	0.1789	0.771	0.5676
HC01	37.366	-107.838	Cutler	Wolfcampian	0	This study	0.439	0.213	0.0204
SM01	38.0555	-107.686	Cutler	Penn-Perm.	Wolfcamp	This study	0.347	0.2523	0.1347
TP01	38.7328	-109.013	Cutler	Penn_Perm.	Woflcamp	This study	0.4584	0.1177	0.0253
JBO1	38.6609	-108.981	Cutler	Penn_Perm.	Wolfcamp	This study	0.4338	0.1194	0.0312
11CVC	38.6627	-109.435	Cutler underferientiated	Wolfcampian	0	Lawton_2015	0.4095	0.1639	0.0507
11CT	38.6451	-109.366	Cutler underferientiated	Wolfcampian	0	Lawton_2015	0.4264	0.1698	0.0721
2QZ-9	33.6193	-114.013	Upper Supai	Permian	Early	This study	0.1109	0.8246	0.8286
SY-C	34.8856	-112.062	Lower Esplanade	Wolfcampain		This study	0.0983	0.8597	0.8732
SY-B	34.8867	-112.055	Hermit	Wolfcampian	0	This study	0.1033	0.8594	0.8319
1PS-4	34.3481	-111.132	Base Hermit	Wolfcampian	0	This study	0.1021	0.8309	0.8541
1WM-478	31.7711	-110.392	Middle Earp	Wolfcampian	0	This study	0.0798	0.8493	0.8346
1WM-520	31.7712	-110.392	Upper Earp	Wolfcampian	0	This study	0.0573	0.8625	0.8798
12-02-16-1	36.7858	-118.066	Pla/b Coyote Springs Hill	Late Wolfcampian	0	This study	0.2838	0.6854	0.2915
12-03-16-1	36.7258	-118.039	Plc, Canyon N of Lucky Slim Mine	Wolfcampian/Leonardian	0	This study	0.2893	0.6897	0.3883
12-03-16-3	36.7225	-118.036	Plc, Lucky Slim Mine	Wolfcampian/Leonardian	0	This study	0.2932	0.6687	0.3264
10-11-15-1	36.8097	-118.11	Plc "Dead Duck Hill" @ Mazurka Canyon	Wolfcampian/Leonardian	0	This study	0.2178	0.6751	0.2548
12-03-16-2	36.7253	-118.04	Pld, Canyon N of Lucky Slim Mine	Wolfcampian/Leonardian	0	This study	0.3352	0.6379	0.2484
09-CM-676	36.494	-117.687	Owens Valley Group, sedimentary rocks of Santa Rosa Flat, unit 2	Permian	0	Attia et al., 2018	0.2	0.7273	0.4025
OK-10-PO1	34.7244	-98.4698	Post Oak Conglomerate	Permian	Lower	Thomas 2014	0.9093	0.0322	0.0004
OK-4-WL	34.3905	-97.4134	Wellington Fm	Permian	0	Thomas 2014	0.3372	0.6582	0.3349
03PL12	43.4325	-114.115	Wilson Creek Member, Wood River Fm.	Permian	Lower	Link 2015	0.1143	0.8059	0.6183
UT1	40.0522	-111.552	Diamond Creek Sandstone	Permian	0	Lawton 2010	0.1648	0.798	0.6412
Washington	40.9822	-81.7742	Washington Fm	Permian	Early	Becker 2006	0.4439	0.5488	0.2921
Greene	41.8548	-80.0992	Greeme Fm	Permian	Early	Becker 2006	0.4876	0.4414	0.2458
WV-1-PR	39.6953	-80.776	Proctor	Permian	lower	Thomas et al., 2017	0.4349	0.5359	0.3566
Upper_Hermit	36.8074	-111.636	Hermit	Wolfcampian-Leonardian	0	Gehrels 2011	0.2989	0.6782	0.3004
Lower_Hermit	36.7354	-111.694	Hermit	Wolfcampian-Leonardian	0	Gehrels 2011	0.1102	0.7969	0.7241
Esplanade	36.7168	-111.709	Esplanade	Wolfcampian	0	Gehrels 2011	0.1314	0.7965	0.7693
Hermit	36.0632	-112.089	Hermit	Wolfcampian-Leonardian	0	Gehrels 2011	0.1316	0.8164	0.667
06GC156	36.3469	-112.89	Esplanade	Wolfcampian	0	Gehrels 2011	0.0987	0.8031	0.7768
06GC155	36.2935	-112.893	Esplanade	Wolfcampian	0	Gehrels 2011	0.1127	0.8298	0.8455
Santa_Terresa	28.9883	-110.807	Sierra Santa Terresa	Permian	lower	Gehrels 2014	0.0827	0.7923	0.8066
Mima_Mexico	28.9219	-109.945	Mima Mexico	Permian	lower	Gehrels 2014	0.1428	0.5847	0.2223
Kindle	58.8147	-125.022	Kindle FM	Wolfcampian		Gehrels and Pecha, 2014	0.085	0.7985	0.6404
O_M source	33.4716	-94.1579	0	0	0	0	0.3559	0.4474	0.2521
Central_App_Crys	35.8682	-81.0818	0	0	0	0	0.4078	0.5124	0.3053
N_Appalachian	45.1842	-69.1996	0	0	0	0	0.3617	0.5914	0.232
NW_Arctic	50.9438	-101.213	0	0	0	0	0.3273	0.6213	0.2366
NE_Arctic	50.9438	-100.213	0	0	0	0	0.1456	0.747	0.5616
Sonora	29.9426	-113.133	0	0	0	0	0.3434	0.5858	0.3662

## Sheet: 4_individual_list
Leary, R.J., Umhoefer, P., Smith, M.E., Smith, T.M., Saylor, J.E., Riggs, N., Burr, G., Lodes, E., Foley, D., Licht, A., Mueller, M.A., and Baird, C., 2020, Provenance of Pennsylvanian–Permian sedimentary rocks associated with the Ancestral Rocky Mountains orogeny in southwestern Laurentia: Implications for continental-scale Laurentian sediment transport systems: Lithosphere, https://doi.org/10.1…
Sample	Lat	Lon	Name	Age	Zone	Ref	KS	Like_kde	X_pdp
ref	0	0	0	0	0	0	1	0	0
AZShelf4	0	0	0	0	0	0	0	1	1
CO-PR-2-0	40.8546	-105.17	Lyons	Guadalupian	0	Nair 2018	0.2323	0.6935	0.3059
12CV50	38.663	-109.437	Basal Castle Valley	Leonardian	0	Lawton_2015	0.1606	0.5822	0.2665
10CVG	38.6653	-109.436	Lower Castle Valley	Leonardian	0	Lawton_2015	0.1167	0.6449	0.3654
10CVR	38.6643	-109.436	Lower Castle Valley	Leonardian	0	Lawton_2015	0.1445	0.7657	0.4735
10CVW	38.6644	-109.437	Upper Castle Valley	Leonardian	0	Lawton_2015	0.1283	0.7256	0.5633
11WRB	37.8894	-110.41	White Rim	Leonardian	0	Lawton_2015	0.1193	0.788	0.5768
11WRA	38.4603	-109.794	White Rim	Leonardian	0	Lawton_2015	0.0449	0.8526	0.6877
2QZ-272	33.6189	-114.01	Coconino SS	Leonardian	0	this study	0.0372	0.8578	0.8838
SY-A	34.8875	-112.053	Schnebly Hill	Leonardian	0	this study	0.1099	0.8479	0.8491
3PS-100	34.3644	-111.138	Schnebly Hill	Leonardian	0	this study	0.1599	0.7793	0.6485
4PS-186	34.3711	-111.143	top Schebly Hill	Leonardian	0	this study	0.0492	0.869	0.8723
Prv	31.6983	-110.499	Rain Valley	Guadalupian	0	this study	0.053	0.808	0.7097
pk0125151	33.9123	-115.062	Kaibab	Guadalupian	0	this study	0.5007	0.4863	0.1432
10-12-15-3	36.4852	-117.736	Ps11,	Guadalupian or Cisuralian	0	this study	0.2128	0.712	0.3814
6-20-17-3	36.5159	-117.733	Ps12a "CM Area 1"	Guadalupian or Cisuralian	0	this study	0.2526	0.6863	0.3042
6-20-17-4	36.5161	-117.733	Ps12a "CM Area 1"	Guadalupian or Cisuralian	0	this study	0.1059	0.8339	0.713
Kaibab2	36.8527	-111.607	Kaibab Fm	Guadalupian	0	Gehrels 2011	0.1196	0.7918	0.7137
Coconino2	36.8238	-111.628	Coconino Fm	Leonardian	0	Gehrels 2011	0.0927	0.8135	0.793
Kaibab	36.0437	-111.825	Kaibab Fm	Guadalupian	0	Gehrels 2011	0.1254	0.7886	0.6591
Toroweap2	36.0584	-112.085	Toroweap Fm	Leonardian	0	Gehrels 2011	0.1452	0.806	0.6851
Coconino1	36.0593	-112.144	Coconino Fm	Leonardian	0	Gehrels 2011	0.0978	0.8253	0.7081
Toroweap1	36.0579	-112.146	Toroweap Fm	Leonardian	0	Gehrels 2011	0.1399	0.7714	0.5885
HB-01-10	44.959	-108.252	Goose_Egg_Fm	P-T	0	May_2013	0.1394	0.8078	0.6632
HB-02-10	44.959	-108.252	Goose_Egg_Fm	P-T	0	May_2013	0.1316	0.7685	0.6257
PHOS	45.4552	-112.573	Phosphoria Formation	Guadalupian	0	this sudy	0.094	0.811	0.6075
JCT-4946	31.3046	-103.146	Bell Canyon Fm	Guadalupian	0	Xie, 2018	0.4311	0.5634	0.1126
CC-I	31.3046	-103.146	Cherry Canyon Fm	Guadalupian	0	Xie, 2018	0.2955	0.6728	0.3388
CC-II	31.3046	-103.146	Cherry Canyon Fm	Guadalupian	0	Xie, 2018	0.3489	0.6472	0.243
CC-III	31.3046	-103.146	Cherry Canyon Fm	Guadalupian	0	Xie, 2018	0.2893	0.6546	0.2611
BrushCn	32.0212	-104.047	Brushy Canyon Fm	Guadalupian	0	Xie, 2018	0.2926	0.6848	0.4991
Rader	31.9316	-104.731	Bell Canyon Fm	Guadalupian	0	Soreghan, 2013	0.2045	0.7248	0.4255
Yates	32.2826	-104.364	Bell Canyon Fm	Guadalupian	0	Soreghan, 2013	0.2161	0.7017	0.4004
Brushy	31.8483	-104.84	Brushy Canyon Fm	Guadalupian	0	Soreghan, 2013	0.2565	0.7052	0.4365
O_M source	33.4716	-94.1579	0	0	0	0	0.2653	0.4667	0.3779
Central_App_Crys	35.8682	-81.0818	0	0	0	0	0.324	0.533	0.4138
N_Appalachian	45.1842	-69.1996	0	0	0	0	0.2683	0.6303	0.3139
NW_Arctic	50.9438	-101.213	0	0	0	0	0.345	0.6052	0.1824
NE_Arctic	50.9438	-100.213	0	0	0	0	0.1614	0.76	0.5484
Sonora	29.9426	-113.133	0	0	0	0	0.3882	0.554	0.2844
