# Supplementary material
Source: publisher figshare collection journal article supplement (https://gsapubs.figshare.com/ndownloader/files/23319257)
Supplement: Supplementary file 1 [file 23319257 › FileDR8. PDF_DZnmf_results.xls]

## Sheet: 2 Sources
Reconstructed Source Distributions					Compare Input & Reconstructed Sink Samples					Sink Sample Weights
Age (Ma)	Source 1	Source 2				Mean		St. Dev.			Princeton, Bluestone, Hinton	Surprise Canyon3- 06GC149, Surprise_Cyn2, SurpriseC_Cngl	24PL09, 10JM94, 40JM94, 05PL15, 09LB04	Mauch_Chunk	KY-21-SG	Tonka	Stanley, Hot_spring	BC05	09-CM-699	MS11, MS10	MS01, MSGE313	BC01, BC02, CC01	ML01, MP-DZ1	1QZ19	SY-D, Watahomigi, Manakacha1	Tumbling Run, Pottsville Fm, OH-1-SS	Pocohontas, Lee, VA-1-GN	Racoon, Montevallo, Sewanee	KY-18-CB	OH-4-SN	BCRA-01-10	MB1-3, MB2-4, MB2-2, MB2-3, MB2-5, MB2-1, MB1-2, MB1-1	a16, a23, a29, a38, a48, a49, a50	46-1, 46-2	IB_AD, IB_M1, IB_M2	FCB_AD	FCB_A2	FCB_A1	S3	GS01, GS09	MS04, MS05, MS06	MC05, MC17	GS11, GS24	MC20	EC01, RC01, RC19	V01, V10, V18, V20	V22, 25	DMR01, LC01, SP01, CF02	HT02,HT14, HT04, HT20, HT24
0	0	7.84882e-13			Cross-correlation	0.646771	±	0.202345		Weights Source 1	0.0195106	0.180068	0.350476	0.0454214	0.102115	0.299643	0.0655402	0.651115	0.0621092	0.446281	0.660149	0.861328	0.049517	0.295046	0.290865	0.00665219	0.0549825	0.0248118	0.080594	0.00503481	0.0110712	0.0741124	0.101225	0.0769666	0.0637324	0.103958	0.110535	0.0205821	0.0908432	0.599162	0	0.563648	1	0.470161	0.728086	0.923524	1	1	0.248055
1	0	8.05989e-13			Likeness	0.694999	±	0.13367		Weights Source 2	0.980489	0.819932	0.649524	0.954579	0.897885	0.700357	0.93446	0.348885	0.937891	0.553719	0.339851	0.138672	0.950483	0.704954	0.709135	0.993348	0.945018	0.975188	0.919406	0.994965	0.988929	0.925888	0.898775	0.923033	0.936268	0.896042	0.889465	0.979418	0.909157	0.400838	1	0.436352	0	0.529839	0.271914	0.0764756	0	0	0.751945
2	0	8.27654e-13			Kuiper V Value	0.229684	±	0.15176
3	0	8.49891e-13			KS D Value	0.195165	±	0.151212		Cross-correlation	0.831416	0.91024	0.018661	0.729912	0.915845	0.0116242	0.651164	0.429462	0.641573	0.691947	0.704044	0.749756	0.765919	0.502616	0.649219	0.599957	0.711444	0.730964	0.833103	0.822846	0.826951	0.828351	0.828845	0.81404	0.903383	0.839506	0.893536	0.766206	0.834606	0.835047	0.442986	0.814634	0.838601	0.664492	0.601575	0.485104	0.452036	0.760083	0.654308
4	0	8.72716e-13								Likeness	0.730627	0.842171	0.243115	0.662589	0.82983	0.213447	0.698647	0.541594	0.699599	0.652951	0.695273	0.734413	0.766602	0.699871	0.746028	0.698453	0.637731	0.661916	0.770124	0.731174	0.746583	0.782811	0.830496	0.773674	0.860135	0.771036	0.83088	0.692723	0.796135	0.767491	0.313686	0.756458	0.700609	0.712138	0.703525	0.576298	0.477268	0.67516	0.769895
5	0	8.96144e-13			Number of sink samples	108				Kuiper V Value	0.248156	0.110534	0.754523	0.259766	0.0969191	0.768691	0.203128	0.272206	0.227177	0.322783	0.193882	0.189562	0.15228	0.253097	0.211708	0.198839	0.348174	0.197158	0.11917	0.225108	0.13613	0.157887	0.142375	0.194759	0.0613583	0.192229	0.100942	0.171688	0.170319	0.176961	0.626179	0.159274	0.210041	0.171794	0.231809	0.380295	0.483349	0.291602	0.168978
6	0	9.20189e-13			Mean Cross-correlation of sink samples	0.318				KS D Value	0.162775	0.0566328	0.753097	0.233753	0.0577538	0.75383	0.182455	0.216658	0.213337	0.198649	0.113991	0.125306	0.146834	0.251345	0.209537	0.184888	0.221005	0.100331	0.0709799	0.205362	0.125513	0.137033	0.101654	0.123613	0.0410401	0.178778	0.0689072	0.151501	0.126551	0.143014	0.391437	0.121603	0.141761	0.108219	0.193047	0.367982	0.430441	0.243131	0.14613
7	0	9.44868e-13			Range Cross-correlation of sink samples	0.962
8	0	9.70198e-13			Mean Kuiper V value of sink samples	0.409
9	0	9.96194e-13			Range Kuiper V value of sink samples	0.952
10	0	1.02287e-12			Final Residual	0.28914
11	0	1.05026e-12			Number of Iterations	140
12	0	1.07836e-12
13	0	1.1072e-12
14	0	1.13679e-12
15	0	1.16717e-12
16	0	1.19833e-12
17	0	1.23032e-12
18	0	1.26314e-12
19	0	1.29682e-12
20	0	1.33138e-12
21	0	1.36685e-12
22	0	1.40324e-12
23	0	1.44058e-12
24	0	1.47889e-12
25	0	1.5182e-12
26	0	1.55854e-12
27	0	1.59992e-12
28	0	1.64238e-12
29	0	1.68595e-12
30	0	1.73064e-12
31	0	1.7765e-12
32	0	1.82354e-12
33	0	1.87181e-12
34	0	1.92133e-12
35	0	1.97212e-12
36	0	2.02423e-12
37	0	2.07769e-12
38	0	2.13253e-12
39	0	2.18879e-12
40	0	2.2465e-12
41	0	2.3057e-12
42	0	2.36642e-12
43	0	2.42871e-12
44	0	2.4926e-12
45	0	2.55814e-12
46	0	2.62536e-12
47	0	2.6943e-12
48	0	2.76502e-12
49	0	2.83756e-12
50	0	2.91195e-12
51	0	2.98825e-12
52	0	3.06651e-12
53	0	3.14677e-12
54	0	3.22909e-12
55	0	3.31352e-12
56	0	3.4001e-12
57	0	3.48889e-12
58	0	3.57996e-12
59	0	3.67335e-12
60	0	3.76912e-12
61	0	3.86734e-12
62	0	3.96806e-12
63	0	4.07135e-12
64	0	4.17727e-12
65	0	4.28589e-12
66	0	4.39727e-12
67	0	4.51149e-12
68	0	4.62861e-12
69	0	4.74872e-12
70	0	4.87187e-12
71	0	4.99816e-12
72	0	5.12766e-12
73	0	5.26045e-12
74	0	5.39661e-12
75	0	5.53623e-12
76	0	5.67939e-12
77	0	5.8262e-12
78	0	5.97672e-12
79	0	6.13107e-12
80	0	6.28934e-12
81	0	6.45162e-12
82	0	6.61803e-12
83	0	6.78866e-12
84	0	6.96362e-12
85	0	7.14302e-12
86	0	7.32699e-12
87	0	7.51562e-12
88	0	7.70905e-12
89	0	7.9074e-12
90	0	8.11078e-12
91	0	8.31935e-12
92	0	8.53322e-12
93	0	8.75253e-12
94	0	8.97743e-12
95	0	9.20807e-12
96	0	9.44458e-12
97	0	9.68714e-12
98	0	9.93589e-12
99	0	1.0191e-11
100	0	1.04526e-11
101	0	1.0721e-11
102	0	1.09962e-11
103	0	1.12785e-11
104	0	1.1568e-11
105	0	1.1865e-11
106	0	1.21696e-11
107	0	1.24821e-11
108	0	1.28027e-11
109	0	1.31315e-11
110	0	1.34689e-11
111	0	1.3815e-11
112	0	1.41702e-11
113	0	1.45346e-11
114	0	1.49084e-11
115	0	1.52921e-11
116	0	1.56859e-11
117	0	1.60899e-11
118	0	1.65047e-11
119	0	1.69303e-11
120	0	1.73673e-11
121	0	1.78159e-11
122	0	1.82764e-11
123	0	1.87495e-11
124	0	1.92406e-11
125	0	2.00335e-11
126	0	3.13909e-11
127	0	2.95366e-10
128	2.85563e-11	4.48012e-09
129	3.81133e-10	4.78238e-08
130	2.74285e-09	3.38117e-07
131	1.28235e-08	1.57719e-06
132	3.9469e-08	4.85235e-06
133	8.00953e-08	9.84596e-06
134	1.07192e-07	1.31766e-05
135	9.46163e-08	1.16306e-05
136	5.50963e-08	6.77269e-06
137	2.12074e-08	2.60685e-06
138	5.51001e-09	6.76905e-07
139	1.24564e-09	1.52076e-07
140	8.36331e-10	1.00824e-07
141	1.46027e-09	1.76195e-07
142	2.69002e-09	3.25512e-07
143	4.68058e-09	5.67639e-07
144	7.65731e-09	9.30029e-07
145	1.17757e-08	1.43147e-06
146	1.70217e-08	2.06978e-06
147	2.31269e-08	2.81142e-06
148	2.95362e-08	3.58743e-06
149	3.54642e-08	4.30028e-06
150	4.00461e-08	4.84248e-06
151	4.25513e-08	5.12264e-06
152	4.25884e-08	5.09066e-06
153	4.02252e-08	4.75236e-06
154	3.5975e-08	4.16769e-06
155	3.06573e-08	3.43342e-06
156	2.5186e-08	2.65703e-06
157	2.03659e-08	1.93145e-06
158	1.67615e-08	1.31868e-06
159	1.46633e-08	8.45387e-07
160	1.4139e-08	5.08599e-07
161	1.51351e-08	2.86713e-07
162	1.76028e-08	1.50888e-07
163	2.16585e-08	7.34996e-08
164	2.7855e-08	3.27592e-08
165	3.77156e-08	1.42538e-08
166	5.47457e-08	1.091e-08
167	8.60643e-08	2.27326e-08
168	1.44436e-07	5.69234e-08
169	2.49717e-07	1.2791e-07
170	4.27792e-07	2.55746e-07
171	7.04699e-07	4.60931e-07
172	1.09506e-06	7.54788e-07
173	1.58744e-06	1.12749e-06
174	2.13377e-06	1.53938e-06
175	2.65148e-06	1.92273e-06
176	3.04301e-06	2.19761e-06
177	3.22797e-06	2.29799e-06
178	3.17373e-06	2.19673e-06
179	2.90914e-06	1.91663e-06
180	2.51396e-06	1.52192e-06
181	2.09089e-06	1.09553e-06
182	1.73578e-06	7.14835e-07
183	1.5206e-06	4.37887e-07
184	1.49285e-06	3.02911e-07
185	1.68278e-06	3.34203e-07
186	2.10394e-06	5.42623e-07
187	2.73879e-06	9.13899e-07
188	3.51662e-06	1.39066e-06
189	4.30562e-06	1.86608e-06
190	4.93998e-06	2.20585e-06
191	5.28003e-06	2.29713e-06
192	5.27424e-06	2.09901e-06
193	4.9829e-06	1.66169e-06
194	4.54634e-06	1.1007e-06
195	4.11878e-06	5.4307e-07
196	3.80902e-06	7.90903e-08
197	3.44937e-06	0
198	3.26266e-06	0
199	3.24435e-06	0
200	3.32379e-06	0
201	3.44868e-06	0
202	3.58759e-06	0
203	3.72422e-06	0
204	3.85078e-06	0
205	3.9635e-06	0
206	4.06036e-06	0
207	4.14018e-06	0
208	4.2023e-06	0
209	4.24664e-06	0
210	4.27369e-06	0
211	4.28467e-06	0
212	4.28152e-06	0
213	4.26702e-06	0
214	4.24471e-06	0
215	4.21884e-06	0
216	4.19412e-06	0
217	4.17544e-06	0
218	4.16741e-06	0
219	4.17383e-06	0
220	4.00622e-06	2.3595e-07
221	3.81784e-06	5.18966e-07
222	3.62209e-06	8.30127e-07
223	3.42142e-06	1.16081e-06
224	3.21829e-06	1.49933e-06
225	3.01512e-06	1.83148e-06
226	2.81435e-06	2.14151e-06
227	2.61843e-06	2.41345e-06
228	2.42989e-06	2.63264e-06
229	2.25148e-06	2.78713e-06
230	2.08627e-06	2.86902e-06
231	1.93783e-06	2.87526e-06
232	1.81038e-06	2.80791e-06
233	1.70903e-06	2.6738e-06
234	1.63988e-06	2.48369e-06
235	1.6102e-06	2.25094e-06
236	1.62842e-06	1.99005e-06
237	1.70395e-06	1.71522e-06
238	1.84687e-06	1.43919e-06
239	2.06729e-06	1.17278e-06
240	2.37426e-06	9.25663e-07
241	2.77404e-06	7.10345e-07
242	3.26686e-06	5.53469e-07
243	3.841e-06	5.22283e-07
244	4.46269e-06	7.74623e-07
245	5.06301e-06	1.62745e-06
246	5.52995e-06	3.59866e-06
247	5.7242e-06	7.32037e-06
248	5.53762e-06	1.32179e-05
249	4.98685e-06	2.09972e-05
250	4.28351e-06	2.92664e-05
251	3.79622e-06	3.57626e-05
252	3.87753e-06	3.83329e-05
253	4.65136e-06	3.61353e-05
254	5.92205e-06	3.01597e-05
255	7.28254e-06	2.26369e-05
256	8.33509e-06	1.58151e-05
257	8.86175e-06	1.10124e-05
258	8.85504e-06	8.44237e-06
259	8.44228e-06	7.62815e-06
260	7.7903e-06	7.92042e-06
261	7.04696e-06	8.80745e-06
262	6.32397e-06	9.99072e-06
263	5.70117e-06	1.13395e-05
264	5.23404e-06	1.2824e-05
265	4.95782e-06	1.4468e-05
266	4.88763e-06	1.63229e-05
267	5.01675e-06	1.84564e-05
268	5.3147e-06	2.09481e-05
269	5.72733e-06	2.38872e-05
270	6.18204e-06	2.73574e-05
271	6.60152e-06	3.1397e-05
272	6.92673e-06	3.59286e-05
273	7.14379e-06	4.06846e-05
274	7.30195e-06	4.51833e-05
275	7.50813e-06	4.88134e-05
276	7.892e-06	5.10296e-05
277	8.55193e-06	5.15791e-05
278	9.50596e-06	5.06283e-05
279	1.0672e-05	4.8701e-05
280	1.18869e-05	4.64536e-05
281	1.29562e-05	4.44197e-05
282	1.37135e-05	4.28649e-05
283	1.40695e-05	4.18109e-05
284	1.40369e-05	4.11752e-05
285	1.37264e-05	4.09214e-05
286	1.33174e-05	4.11348e-05
287	1.30127e-05	4.20018e-05
288	1.29886e-05	4.37252e-05
289	1.33577e-05	4.64297e-05
290	1.41524e-05	5.01008e-05
291	1.53342e-05	5.458e-05
292	1.68202e-05	5.96134e-05
293	1.85101e-05	6.49325e-05
294	2.02952e-05	7.03517e-05
295	2.20416e-05	7.58745e-05
296	2.35622e-05	8.17834e-05
297	2.46209e-05	8.86182e-05
298	2.50096e-05	9.69265e-05
299	2.46481e-05	0.000106893
300	2.35986e-05	0.000118149
301	2.21105e-05	0.000129586
302	2.08199e-05	0.000138981
303	2.04913e-05	0.000143897
304	2.1063e-05	0.000144289
305	2.14818e-05	0.000142985
306	2.07987e-05	0.000142856
307	1.88453e-05	0.000144922
308	1.58911e-05	0.000149032
309	1.21269e-05	0.000155124
310	7.97847e-06	0.000162553
311	5.16697e-06	0.000167611
312	5.21126e-06	0.000167216
313	6.92577e-06	0.000164973
314	8.64042e-06	0.000165609
315	1.03988e-05	0.000169468
316	1.28173e-05	0.000175262
317	1.62617e-05	0.000182195
318	2.10232e-05	0.000189805
319	2.74461e-05	0.000197809
320	3.57317e-05	0.000206054
321	4.55427e-05	0.000214035
322	5.5831e-05	0.000220466
323	6.52937e-05	0.000223959
324	7.31015e-05	0.000224528
325	7.89734e-05	0.000224128
326	8.24395e-05	0.000225565
327	8.23499e-05	0.000231145
328	7.75762e-05	0.000241768
329	6.84407e-05	0.000256164
330	5.72731e-05	0.000270905
331	4.71623e-05	0.00028218
332	4.01e-05	0.000287908
333	3.63817e-05	0.000287992
334	3.52207e-05	0.000283458
335	3.53421e-05	0.000276265
336	3.5403e-05	0.000269084
337	3.46408e-05	0.000263986
338	3.33543e-05	0.000261336
339	3.25821e-05	0.00026054
340	3.31103e-05	0.000262262
341	3.47384e-05	0.000269
342	3.65105e-05	0.000280929
343	3.73101e-05	0.000291716
344	3.59559e-05	0.000293952
345	3.16079e-05	0.000288468
346	2.52793e-05	0.000281072
347	2.00692e-05	0.000272836
348	1.81224e-05	0.000261553
349	1.80635e-05	0.000248859
350	1.69355e-05	0.000239255
351	1.36219e-05	0.000234567
352	9.14678e-06	0.000233185
353	4.75629e-06	0.000233206
354	8.61741e-07	0.000234211
355	0	0.000236197
356	0	0.000240156
357	0	0.000246528
358	0	0.00025521
359	0	0.00026563
360	0	0.000276762
361	0	0.000287372
362	0	0.000296433
363	0	0.000303533
364	0	0.000309141
365	0	0.000314531
366	0	0.000320998
367	0	0.000328633
368	0	0.000336385
369	0	0.000344153
370	0	0.000353706
371	0	0.000365481
372	0	0.000376481
373	0	0.000385277
374	0	0.000395107
375	0	0.000408142
376	0	0.000421293
377	0	0.000429039
378	0	0.000428704
379	0	0.000422918
380	0	0.000416961
381	0	0.000414515
382	0	0.000416121
383	0	0.000420015
384	0	0.000423659
385	0	0.000425605
386	0	0.000426659
387	0	0.000429056
388	0	0.000434686
389	0	0.000444386
390	0	0.000458189
391	0	0.000475006
392	0	0.000492484
393	0	0.000509274
394	0	0.000527187
395	0	0.000549442
396	0	0.000577641
397	0	0.000610745
398	0	0.000645981
399	0	0.000681019
400	0	0.000715496
401	0	0.000750149
402	0	0.000785281
403	0	0.00082108
404	0	0.00085861
405	0	0.000898967
406	0	0.000941797
407	0	0.000986032
408	0	0.00103204
409	0	0.00108112
410	0	0.00113253
411	0	0.00118307
412	0	0.00122988
413	0	0.0012722
414	0	0.00130959
415	0	0.0013402
416	0	0.00136245
417	0	0.00137727
418	0	0.00138732
419	0	0.00139467
420	0	0.00140061
421	0	0.00140693
422	0	0.00141622
423	0	0.00142936
424	2.168e-05	0.00143794
425	4.49066e-05	0.00143874
426	6.17402e-05	0.00142915
427	7.47e-05	0.00141045
428	8.54603e-05	0.00138753
429	9.35375e-05	0.00136532
430	9.86234e-05	0.00134567
431	0.000101729	0.00132723
432	0.000103735	0.00130833
433	0.000104234	0.00128878
434	0.000102053	0.00126889
435	9.6503e-05	0.00124822
436	8.81752e-05	0.00122541
437	7.86703e-05	0.00119927
438	6.93662e-05	0.00116996
439	6.03116e-05	0.00113919
440	5.02054e-05	0.00110954
441	3.779e-05	0.00108272
442	2.44977e-05	0.00105534
443	1.31639e-05	0.00102242
444	2.80467e-06	0.000988571
445	0	0.000959265
446	0	0.000936108
447	0	0.000917576
448	0	0.000901935
449	0	0.000888091
450	0	0.000875408
451	0	0.000863653
452	0	0.000853256
453	0	0.000845429
454	0	0.000841461
455	0	0.000841234
456	0	0.000842148
457	0	0.000840114
458	0	0.000832663
459	0	0.000821281
460	0	0.000809806
461	0	0.00080007
462	0	0.000789882
463	0	0.000775713
464	0	0.000756267
465	0	0.000732995
466	0	0.000708617
467	0	0.000685946
468	0	0.000667057
469	0	0.000652446
470	0	0.000640623
471	0	0.000628631
472	0	0.0006135
473	0	0.000593901
474	0	0.000570855
475	0	0.000546912
476	0	0.000524458
477	0	0.000504464
478	0	0.000486423
479	0	0.000469197
480	0	0.000451998
481	0	0.000434867
482	0	0.000418426
483	7.09158e-06	0.000401707
484	1.72441e-05	0.000385346
485	2.85853e-05	0.000369203
486	4.13037e-05	0.000353153
487	5.52372e-05	0.000337758
488	7.01936e-05	0.000323583
489	8.62377e-05	0.000310588
490	0.000103679	0.000298244
491	0.000122896	0.000285988
492	0.00014423	0.000273474
493	0.000167962	0.000260564
494	0.000194328	0.000247235
495	0.000223512	0.000233551
496	0.000255646	0.000219654
497	0.000290816	0.000205721
498	0.0003291	0.000191882
499	0.000370598	0.000178145
500	0.000415445	0.000164383
501	0.000463788	0.000150394
502	0.000515756	0.000135993
503	0.000571432	0.000121075
504	0.000630851	0.000105627
505	0.000694014	8.96743e-05
506	0.000760928	7.32247e-05
507	0.000831627	5.62397e-05
508	0.000906181	3.8664e-05
509	0.000984686	2.04855e-05
510	0.00106725	1.78102e-06
511	0.00114001	0
512	0.00121548	0
513	0.00129541	0
514	0.00138	0
515	0.00146943	0
516	0.00156369	0
517	0.00166253	0
518	0.0017653	0
519	0.00187084	0
520	0.00197752	0
521	0.00208337	0
522	0.00218638	0
523	0.00228487	0
524	0.00237763	0
525	0.00246393	0
526	0.00254335	0
527	0.00261539	0
528	0.00267931	0
529	0.00273401	0
530	0.00277813	0
531	0.00281008	0
532	0.00282775	0
533	0.0028279	0
534	0.00280544	0
535	0.00275357	0
536	0.00266559	0
537	0.00253899	0
538	0.00238014	0
539	0.00220465	0
540	0.0020307	0
541	0.00184806	2.71307e-05
542	0.00166842	6.9904e-05
543	0.00150544	0.000108303
544	0.00135695	0.000142266
545	0.00122277	0.000171488
546	0.00110319	0.000195788
547	0.000997721	0.000215379
548	0.000905003	0.00023089
549	0.00082329	0.000243279
550	0.000750815	0.00025366
551	0.000685978	0.00026307
552	0.000627481	0.000272215
553	0.00057439	0.000281323
554	0.000526119	0.00029018
555	0.000482323	0.000298303
556	0.000442739	0.000305226
557	0.000407025	0.0003108
558	0.000374644	0.000315429
559	0.000344873	0.000320044
560	0.00031707	0.00032562
561	0.000291086	0.000332389
562	0.000267387	0.000339527
563	0.000246505	0.000345922
564	0.000228291	0.000351263
565	0.000211859	0.000356022
566	0.000196263	0.000360445
567	0.000181068	0.000364023
568	0.00016636	0.000366032
569	0.000152452	0.000366325
570	0.00013962	0.000365543
571	0.000127966	0.000364783
572	0.00011736	0.000365152
573	0.000107464	0.000367497
574	9.78237e-05	0.000372328
575	8.79959e-05	0.000379824
576	7.76591e-05	0.000389845
577	6.66875e-05	0.000401956
578	5.51561e-05	0.000415511
579	4.32757e-05	0.0004298
580	3.12958e-05	0.000444226
581	1.94319e-05	0.0004584
582	7.86246e-06	0.000472119
583	0	0.000484586
584	0	0.000494791
585	0	0.000504076
586	0	0.000512183
587	0	0.000518996
588	0	0.000524627
589	0	0.000529389
590	0	0.000533634
591	0	0.000537556
592	0	0.000541067
593	0	0.000543838
594	0	0.000545486
595	0	0.000545818
596	0	0.000544991
597	0	0.000543509
598	0	0.00054207
599	0	0.000541343
600	0	0.000541799
601	0	0.000543641
602	0	0.000546836
603	0	0.000551203
604	0	0.000556499
605	0	0.000562479
606	0	0.000568914
607	0	0.0005756
608	0	0.000582348
609	0	0.000589009
610	0	0.000595505
611	0	0.00060183
612	0	0.000607919
613	0	0.000613382
614	0	0.000617212
615	0	0.000617818
616	0	0.000613588
617	0	0.000603775
618	0	0.000589115
619	0	0.000571684
620	0	0.000554023
621	0	0.000538141
622	0	0.000524925
623	0	0.000514084
624	0	0.000504445
625	0	0.000494435
626	0	0.000482681
627	0	0.000468553
628	0	0.000452372
629	0	0.000435158
630	0	0.000418116
631	0	0.000402199
632	0	0.000387928
633	0	0.000375447
634	0	0.00036466
635	0	0.000355367
636	0	0.000347312
637	0	0.00034017
638	0	0.000333527
639	0	0.000326924
640	0	0.000319959
641	0	0.000312402
642	0	0.000304237
643	0	0.000295613
644	0	0.00028674
645	0	0.00027781
646	0	0.000268964
647	0	0.000260314
648	0	0.000251988
649	0	0.000244138
650	0	0.000236923
651	0	0.000230445
652	0	0.000224682
653	0	0.000219446
654	0	0.000214409
655	0	0.000209212
656	0	0.000203591
657	0	0.000197476
658	0	0.000190997
659	0	0.000184398
660	0	0.000177934
661	0	0.000171794
662	0	0.000166081
663	0	0.000160828
664	0	0.000156001
665	0	0.000151486
666	0	0.000147089
667	0	0.000142577
668	0	0.000137782
669	0	0.000132685
670	0	0.000127434
671	0	0.000122261
672	0	0.000117376
673	0	0.00011289
674	0	0.000108819
675	0	0.000105121
676	0	0.000101743
677	0	9.86448e-05
678	0	9.5799e-05
679	0	9.31892e-05
680	0	9.0802e-05
681	0	8.86251e-05
682	0	8.66448e-05
683	0	8.48453e-05
684	0	8.32076e-05
685	0	8.17089e-05
686	0	8.03254e-05
687	0	7.90362e-05
688	0	7.78327e-05
689	0	7.67305e-05
690	0	7.57844e-05
691	0	7.50999e-05
692	0	7.48312e-05
693	0	7.5152e-05
694	0	7.6195e-05
695	0	7.79682e-05
696	0	8.02811e-05
697	0	8.27248e-05
698	0	8.47378e-05
699	0	8.57516e-05
700	0	8.53676e-05
701	0	8.34883e-05
702	0	8.03456e-05
703	0	7.6415e-05
704	0	7.2258e-05
705	0	6.83632e-05
706	0	6.50447e-05
707	0	6.24204e-05
708	0	6.04532e-05
709	0	5.90198e-05
710	0	5.7974e-05
711	0	5.71869e-05
712	0	5.65635e-05
713	0	5.6043e-05
714	0	5.55923e-05
715	0	5.51968e-05
716	0	5.48539e-05
717	0	5.45674e-05
718	0	5.43436e-05
719	0	5.41887e-05
720	0	5.41065e-05
721	0	5.40976e-05
722	0	5.41582e-05
723	0	5.428e-05
724	0	5.44508e-05
725	0	5.4655e-05
726	0	5.4875e-05
727	0	5.50925e-05
728	0	5.52904e-05
729	0	5.5454e-05
730	0	5.55726e-05
731	0	5.56404e-05
732	0	5.56567e-05
733	3.01911e-07	5.55652e-05
734	6.05971e-07	5.54363e-05
735	8.82807e-07	5.52899e-05
736	1.1183e-06	5.51455e-05
737	1.29799e-06	5.50242e-05
738	1.40778e-06	5.49474e-05
739	1.43468e-06	5.49352e-05
740	1.36733e-06	5.5005e-05
741	1.19645e-06	5.51707e-05
742	9.15204e-07	5.5442e-05
743	5.19378e-07	5.58234e-05
744	7.49027e-09	5.63147e-05
745	0	5.6785e-05
746	0	5.73268e-05
747	0	5.79301e-05
748	0	5.85824e-05
749	0	5.92706e-05
750	0	5.99836e-05
751	0	6.07134e-05
752	0	6.14564e-05
753	0	6.22147e-05
754	0	6.29965e-05
755	0	6.38152e-05
756	0	6.4689e-05
757	0	6.56375e-05
758	0	6.6679e-05
759	0	6.78255e-05
760	0	6.90774e-05
761	0	7.04192e-05
762	0	7.18149e-05
763	0	7.32072e-05
764	0	7.45201e-05
765	0	7.56656e-05
766	0	7.6554e-05
767	0	7.71073e-05
768	0	7.72714e-05
769	0	7.70261e-05
770	0	7.63892e-05
771	0	7.54145e-05
772	0	7.41838e-05
773	0	7.27952e-05
774	0	7.13492e-05
775	0	6.99384e-05
776	0	6.86391e-05
777	0	6.75077e-05
778	0	6.65804e-05
779	0	6.58722e-05
780	0	6.53769e-05
781	0	6.5065e-05
782	0	6.48823e-05
783	0	6.47534e-05
784	0	6.45896e-05
785	0	6.43041e-05
786	0	6.38304e-05
787	0	6.31372e-05
788	0	6.22357e-05
789	0	6.11754e-05
790	0	6.00301e-05
791	0	5.888e-05
792	0	5.77945e-05
793	0	5.6822e-05
794	0	5.59874e-05
795	0	5.52948e-05
796	0	5.4735e-05
797	0	5.42922e-05
798	0	5.39496e-05
799	0	5.36929e-05
800	0	5.35117e-05
801	0	5.33998e-05
802	0	5.33549e-05
803	0	5.33776e-05
804	0	5.34706e-05
805	0	5.36381e-05
806	0	5.38851e-05
807	0	5.42169e-05
808	8.27851e-07	5.44701e-05
809	1.72981e-06	5.48019e-05
810	2.39281e-06	5.52784e-05
811	2.75292e-06	5.59126e-05
812	2.76219e-06	5.67109e-05
813	2.39528e-06	5.76713e-05
814	1.65377e-06	5.8782e-05
815	5.67386e-07	6.00219e-05
816	0	6.11978e-05
817	0	6.22816e-05
818	0	6.33722e-05
819	0	6.44572e-05
820	0	6.55302e-05
821	0	6.65899e-05
822	0	6.76395e-05
823	0	6.86835e-05
824	0	6.97237e-05
825	0	7.07562e-05
826	0	7.17685e-05
827	0	7.27399e-05
828	0	7.36425e-05
829	0	7.4445e-05
830	0	7.51167e-05
831	0	7.56319e-05
832	0	7.59724e-05
833	0	7.61298e-05
834	0	7.61054e-05
835	0	7.59096e-05
836	0	7.5561e-05
837	0	7.50848e-05
838	0	7.45124e-05
839	0	7.38801e-05
840	0	7.3228e-05
841	0	7.25986e-05
842	0	7.20343e-05
843	0	7.15746e-05
844	0	7.12533e-05
845	0	7.10957e-05
846	0	7.1116e-05
847	0	7.13158e-05
848	0	7.16839e-05
849	0	7.21976e-05
850	0	7.28248e-05
851	0	7.35279e-05
852	0	7.42687e-05
853	0	7.50136e-05
854	0	7.57378e-05
855	0	7.64294e-05
856	0	7.70908e-05
857	0	7.77384e-05
858	0	7.84009e-05
859	0	7.91154e-05
860	0	7.99236e-05
861	0	8.08674e-05
862	0	8.19848e-05
863	0	8.33065e-05
864	0	8.48528e-05
865	0	8.66309e-05
866	0	8.86332e-05
867	0	9.08354e-05
868	0	9.31969e-05
869	0	9.56626e-05
870	0	9.8167e-05
871	0	0.00010064
872	0	0.000103017
873	0	0.000105243
874	0	0.000107287
875	0	0.000109139
876	0	0.000110819
877	0	0.00011237
878	0	0.000113852
879	0	0.000115334
880	0	0.000116886
881	0	0.000118569
882	0	0.000120431
883	0	0.000122504
884	0	0.000124807
885	0	0.000127346
886	0	0.000130123
887	0	0.000133135
888	0	0.00013638
889	0	0.000139855
890	0	0.000143558
891	0	0.000147486
892	0	0.00015163
893	0	0.000155977
894	0	0.000160506
895	0	0.000165191
896	0	0.000170004
897	0	0.000174911
898	0	0.00017988
899	0	0.000184878
900	0	0.000189878
901	0	0.000194852
902	0	0.000199776
903	0	0.000204631
904	0	0.000209398
905	0	0.000214063
906	0	0.000218618
907	0	0.000223058
908	0	0.000227389
909	0	0.000231624
910	0	0.000235786
911	0	0.000239908
912	0	0.000244028
913	0	0.00024819
914	0	0.000252439
915	0	0.000256815
916	0	0.000261352
917	0	0.000266073
918	0	0.000270994
919	0	0.000276123
920	0	0.000281464
921	0	0.000287025
922	0	0.000292817
923	0	0.000298861
924	0	0.000305185
925	0	0.000311824
926	0	0.000318817
927	0	0.000326205
928	0	0.00033403
929	0	0.000342334
930	0	0.000351154
931	0	0.000360511
932	0	0.000370394
933	0	0.000380744
934	0	0.000391444
935	0	0.000402331
936	0	0.000413217
937	0	0.00042393
938	0	0.000434341
939	0	0.000444366
940	0	0.000453954
941	0	0.000463069
942	0	0.000471679
943	0	0.000479767
944	0	0.000487351
945	0	0.000494504
946	0	0.000501355
947	0	0.000508074
948	0	0.000514842
949	0	0.000521815
950	0	0.000529095
951	0	0.000536711
952	0	0.000544617
953	0	0.000552701
954	0	0.000560823
955	0	0.000568844
956	0	0.000576667
957	0	0.000584259
958	0	0.00059166
959	0	0.000598967
960	0	0.00060631
961	0	0.000613824
962	0	0.000621628
963	0	0.00062981
964	0	0.000638428
965	0	0.00064752
966	0	0.000657112
967	0	0.000667229
968	0	0.000677896
969	0	0.00068914
970	0	0.000700974
971	0	0.000713388
972	0	0.000726331
973	0	0.00073972
974	0	0.000753455
975	0	0.000767452
976	0	0.000781667
977	0	0.000796112
978	0	0.000810839
979	0	0.000825912
980	0	0.000841375
981	0	0.000857236
982	0	0.000873463
983	0	0.000889998
984	0	0.000906778
985	0	0.000923751
986	0	0.000940876
987	0	0.00095813
988	0	0.00097549
989	0	0.000992932
990	0	0.00101042
991	0	0.00102789
992	0	0.00104529
993	0	0.00106258
994	0	0.00107972
995	0	0.00109672
996	0	0.00111365
997	0	0.00113058
998	0	0.00114763
999	0	0.00116491
1000	0	0.00118252
1001	0	0.00120051
1002	0	0.00121893
1003	0	0.00123776
1004	0	0.00125698
1005	0	0.00127654
1006	0	0.00129637
1007	0	0.0013164
1008	0	0.00133656
1009	0	0.00135678
1010	0	0.00137702
1011	0	0.00139724
1012	0	0.00141743
1013	0	0.00143758
1014	0	0.00145771
1015	0	0.00147783
1016	0	0.00149797
1017	0	0.00151815
1018	0	0.00153838
1019	0	0.00155865
1020	0	0.00157894
1021	0	0.00159919
1022	0	0.00161931
1023	0	0.00163918
1024	0	0.00165864
1025	0	0.00167754
1026	0	0.00169572
1027	0	0.00171306
1028	0	0.00172946
1029	0	0.00174491
1030	0	0.00175943
1031	0	0.00177311
1032	0	0.00178611
1033	0	0.0017986
1034	0	0.00181075
1035	0	0.00182275
1036	0	0.00183471
1037	0	0.0018467
1038	0	0.00185876
1039	0	0.00187085
1040	0	0.00188292
1041	0	0.00189494
1042	0	0.0019069
1043	0	0.0019188
1044	0	0.00193065
1045	0	0.00194242
1046	0	0.00195401
1047	0	0.00196524
1048	0	0.00197594
1049	0	0.00198593
1050	0	0.00199515
1051	0	0.0020036
1052	0	0.0020114
1053	0	0.00201868
1054	0	0.00202557
1055	0	0.00203211
1056	0	0.00203832
1057	0	0.00204413
1058	0	0.00204948
1059	0	0.00205428
1060	0	0.00205847
1061	0	0.002062
1062	0	0.00206484
1063	0	0.00206696
1064	0	0.00206836
1065	0	0.00206905
1066	0	0.00206906
1067	0	0.00206846
1068	0	0.00206733
1069	0	0.00206576
1070	0	0.00206384
1071	0	0.00206165
1072	0	0.00205924
1073	0	0.00205667
1074	0	0.00205398
1075	0	0.00205122
1076	0	0.00204845
1077	0	0.00204562
1078	0	0.00204259
1079	0	0.00203903
1080	0	0.00203445
1081	0	0.00202827
1082	0	0.00202002
1083	0	0.00200949
1084	0	0.00199678
1085	0	0.00198232
1086	0	0.00196667
1087	0	0.00195041
1088	0	0.00193395
1089	0	0.00191752
1090	0	0.00190121
1091	0	0.00188505
1092	0	0.00186902
1093	0	0.00185317
1094	0	0.00183751
1095	0	0.00182211
1096	0	0.00180699
1097	0	0.00179215
1098	0	0.00177757
1099	0	0.00176321
1100	0	0.00174905
1101	0	0.00173507
1102	0	0.00172128
1103	0	0.00170773
1104	0	0.00169448
1105	0	0.0016816
1106	0	0.00166916
1107	0	0.00165722
1108	0	0.0016458
1109	0	0.0016349
1110	0	0.00162452
1111	0	0.0016146
1112	0	0.00160513
1113	0	0.00159606
1114	0	0.00158737
1115	0	0.00157906
1116	0	0.00157111
1117	0	0.00156349
1118	0	0.00155617
1119	0	0.00154909
1120	0	0.0015422
1121	0	0.00153546
1122	0	0.00152884
1123	0	0.00152238
1124	0	0.00151613
1125	0	0.0015102
1126	0	0.00150468
1127	0	0.00149968
1128	0	0.00149527
1129	0	0.00149149
1130	0	0.00148836
1131	0	0.00148584
1132	0	0.0014839
1133	0	0.00148245
1134	0	0.00148139
1135	0	0.00148062
1136	0	0.00147999
1137	0	0.00147939
1138	0	0.0014787
1139	0	0.00147782
1140	0	0.00147667
1141	0	0.00147516
1142	0	0.00147318
1143	0	0.00147063
1144	0	0.00146739
1145	0	0.00146337
1146	0	0.00145853
1147	0	0.00145292
1148	0	0.00144663
1149	0	0.00143982
1150	0	0.00143264
1151	0	0.00142521
1152	0	0.00141762
1153	0	0.00140988
1154	0	0.00140196
1155	0	0.00139385
1156	0	0.00138549
1157	0	0.00137687
1158	0	0.001368
1159	0	0.00135889
1160	0	0.00134958
1161	0	0.00134011
1162	0	0.0013305
1163	0	0.00132078
1164	0	0.00131095
1165	0	0.00130102
1166	0	0.00129099
1167	0	0.00128088
1168	0	0.0012707
1169	0	0.00126048
1170	0	0.00125024
1171	0	0.00123998
1172	0	0.00122971
1173	0	0.00121938
1174	0	0.00120897
1175	0	0.00119841
1176	0	0.00118768
1177	0	0.00117673
1178	0	0.00116555
1179	0	0.00115416
1180	0	0.00114259
1181	0	0.00113086
1182	0	0.00111903
1183	0	0.00110715
1184	0	0.00109527
1185	0	0.00108343
1186	0	0.00107167
1187	0	0.00106003
1188	0	0.00104853
1189	0	0.00103718
1190	0	0.00102603
1191	0	0.00101508
1192	0	0.00100436
1193	0	0.000993896
1194	0	0.000983715
1195	0	0.000973839
1196	0	0.000964286
1197	0	0.00095507
1198	0	0.000946203
1199	0	0.000937701
1200	0	0.000929587
1201	0	0.000921898
1202	0	0.000914678
1203	0	0.000907966
1204	0	0.000901759
1205	0	0.000895989
1206	0	0.000890515
1207	0	0.000885146
1208	0	0.000879705
1209	0	0.00087409
1210	0	0.000868301
1211	0	0.000862422
1212	0	0.000856552
1213	0	0.000850746
1214	0	0.000844973
1215	0	0.000839131
1216	0	0.000833077
1217	0	0.000826683
1218	0	0.000819871
1219	0	0.000812634
1220	0	0.000805044
1221	0	0.000797235
1222	0	0.000789381
1223	0	0.000781662
1224	0	0.000774241
1225	0	0.000767238
1226	0	0.00076072
1227	0	0.000754698
1228	0	0.000749134
1229	0	0.000743952
1230	0	0.00073905
1231	0	0.000734311
1232	0	0.000729618
1233	0	0.000724861
1234	0	0.000719957
1235	0	0.000714867
1236	0	0.000709609
1237	0	0.000704259
1238	0	0.000698932
1239	0	0.000693717
1240	0	0.000688607
1241	0	0.000683435
1242	0	0.000677879
1243	0	0.000671554
1244	0	0.000664173
1245	0	0.000655691
1246	0	0.000646367
1247	0	0.000636692
1248	0	0.000627227
1249	0	0.000618436
1250	0	0.000610581
1251	0	0.00060372
1252	0	0.000597761
1253	0	0.000592551
1254	0	0.000587943
1255	0	0.000583841
1256	0	0.000580221
1257	0	0.000577135
1258	0	0.000574687
1259	0	0.00057299
1260	0	0.000572083
1261	0	0.000571844
1262	0	0.000571951
1263	0	0.000571926
1264	0	0.000571289
1265	0	0.000569735
1266	0	0.000567238
1267	0	0.000564034
1268	0	0.000560463
1269	0	0.000556813
1270	0	0.000553224
1271	0	0.000549705
1272	0	0.000546226
1273	0	0.000542786
1274	0	0.000539444
1275	0	0.000536287
1276	0	0.000533386
1277	0	0.000530765
1278	0	0.000528399
1279	0	0.000526223
1280	0	0.000524163
1281	0	0.00052215
1282	0	0.000520128
1283	0	0.000518064
1284	0	0.000515943
1285	0	0.000513768
1286	0	0.000511553
1287	2.88154e-08	0.000509322
1288	4.09668e-07	0.000507043
1289	7.59646e-07	0.000504832
1290	1.11053e-06	0.000502721
1291	1.49385e-06	0.000500743
1292	1.93869e-06	0.000498925
1293	2.46991e-06	0.000497296
1294	3.10699e-06	0.00049588
1295	3.86361e-06	0.000494704
1296	4.74802e-06	0.000493791
1297	5.76387e-06	0.000493168
1298	6.91152e-06	0.000492858
1299	8.18923e-06	0.000492884
1300	9.5943e-06	0.000493263
1301	1.11237e-05	0.000494007
1302	1.27744e-05	0.000495123
1303	1.45431e-05	0.000496608
1304	1.64259e-05	0.000498452
1305	1.84175e-05	0.000500637
1306	2.05111e-05	0.00050314
1307	2.26982e-05	0.00050593
1308	2.49687e-05	0.000508974
1309	2.73127e-05	0.000512233
1310	2.97216e-05	0.000515668
1311	3.21913e-05	0.000519235
1312	3.47241e-05	0.000522884
1313	3.7331e-05	0.000526561
1314	4.00327e-05	0.000530205
1315	4.28587e-05	0.000533752
1316	4.58457e-05	0.000537139
1317	4.90339e-05	0.000540308
1318	5.24631e-05	0.00054321
1319	5.61694e-05	0.000545812
1320	6.01815e-05	0.000548095
1321	6.4519e-05	0.000550057
1322	6.919e-05	0.00055171
1323	7.41911e-05	0.000553081
1324	7.9507e-05	0.000554209
1325	8.51123e-05	0.000555141
1326	9.0974e-05	0.00055593
1327	9.70549e-05	0.000556628
1328	0.000103318	0.000557283
1329	0.00010973	0.000557933
1330	0.000116264	0.000558602
1331	0.000122902	0.0005593
1332	0.000129629	0.000560024
1333	0.000136437	0.000560764
1334	0.000143317	0.000561505
1335	0.00015026	0.000562239
1336	0.000157247	0.000562962
1337	0.000164251	0.000563686
1338	0.000171236	0.000564437
1339	0.000178157	0.000565252
1340	0.000184962	0.000566174
1341	0.000191609	0.000567238
1342	0.000198071	0.000568451
1343	0.000204353	0.000569776
1344	0.000210504	0.000571116
1345	0.00021662	0.000572311
1346	0.000222831	0.000573155
1347	0.000229282	0.00057343
1348	0.000236099	0.000572957
1349	0.000243363	0.000571635
1350	0.000251084	0.000569472
1351	0.000259209	0.000566585
1352	0.000267631	0.000563175
1353	0.000276225	0.000559477
1354	0.000284878	0.000555717
1355	0.000293521	0.00055207
1356	0.000302131	0.000548649
1357	0.000310741	0.000545508
1358	0.00031942	0.000542658
1359	0.000328263	0.000540091
1360	0.000337381	0.000537792
1361	0.000346887	0.000535751
1362	0.000356896	0.000533965
1363	0.000367518	0.000532437
1364	0.000378857	0.000531173
1365	0.000391003	0.000530167
1366	0.000404029	0.000529394
1367	0.000417985	0.000528791
1368	0.000432896	0.000528249
1369	0.000448766	0.000527615
1370	0.000465583	0.000526698
1371	0.000483332	0.000525299
1372	0.000502009	0.00052324
1373	0.000521645	0.000520389
1374	0.000542308	0.000516682
1375	0.000564123	0.000512128
1376	0.000587265	0.000506792
1377	0.000611957	0.000500777
1378	0.000638459	0.000494192
1379	0.000667045	0.000487129
1380	0.000697995	0.000479643
1381	0.000731574	0.00047175
1382	0.00076802	0.000463427
1383	0.000807539	0.000454633
1384	0.000850306	0.000445319
1385	0.000896462	0.000435451
1386	0.000946125	0.000425012
1387	0.000999403	0.000414005
1388	0.00105641	0.000402441
1389	0.00111725	0.000390322
1390	0.0011821	0.000377622
1391	0.00125112	0.000364276
1392	0.00132451	0.000350184
1393	0.00140248	0.000335231
1394	0.00148521	0.000319314
1395	0.00157284	0.000302377
1396	0.00166545	0.000284426
1397	0.00176307	0.00026553
1398	0.00186564	0.000245801
1399	0.00197309	0.000225365
1400	0.00208528	0.000204339
1401	0.00220205	0.000182816
1402	0.00232322	0.000160861
1403	0.00244856	0.000138523
1404	0.00257777	0.000115847
1405	0.00271053	9.28849e-05
1406	0.00284644	6.97048e-05
1407	0.00298503	4.63931e-05
1408	0.0031258	2.30548e-05
1409	0.00326802	0
1410	0.00339276	0
1411	0.00351812	0
1412	0.0036435	0
1413	0.0037683	0
1414	0.00389184	0
1415	0.00401346	0
1416	0.00413244	0
1417	0.00424811	0
1418	0.00435977	0
1419	0.00446676	0
1420	0.00456846	0
1421	0.00466428	0
1422	0.00475369	0
1423	0.00483623	0
1424	0.00491153	0
1425	0.00497931	0
1426	0.00503933	0
1427	0.00509145	0
1428	0.00513554	0
1429	0.00517147	0
1430	0.00519912	0
1431	0.00521837	0
1432	0.00522904	0
1433	0.00523101	0
1434	0.00522414	0
1435	0.00520838	0
1436	0.00518371	0
1437	0.00515018	0
1438	0.00510791	0
1439	0.00505708	0
1440	0.00499794	0
1441	0.00493078	0
1442	0.00485597	0
1443	0.00477393	0
1444	0.00468513	0
1445	0.00459009	0
1446	0.00448934	0
1447	0.00438346	0
1448	0.00427299	0
1449	0.004139	2.40436e-05
1450	0.00400015	4.97312e-05
1451	0.00385796	7.58062e-05
1452	0.00371297	0.000102241
1453	0.00356577	0.00012905
1454	0.00341696	0.000156262
1455	0.00326729	0.000183873
1456	0.00311762	0.000211784
1457	0.00296894	0.000239755
1458	0.00282227	0.000267403
1459	0.00267859	0.000294257
1460	0.00253872	0.000319851
1461	0.00240325	0.000343814
1462	0.00227256	0.000365933
1463	0.00214688	0.000386165
1464	0.00202637	0.000404625
1465	0.00191118	0.000421547
1466	0.00180147	0.000437236
1467	0.00169736	0.00045201
1468	0.00159894	0.000466136
1469	0.00150618	0.000479795
1470	0.001419	0.000493079
1471	0.0013372	0.000506025
1472	0.00126052	0.000518647
1473	0.00118871	0.000530916
1474	0.00112158	0.000542659
1475	0.00105904	0.00055353
1476	0.00100104	0.000563154
1477	0.000947481	0.000571416
1478	0.000898091	0.000578595
1479	0.000852527	0.000585197
1480	0.000810481	0.00059164
1481	0.000771733	0.000598097
1482	0.000736131	0.000604545
1483	0.000703538	0.000610893
1484	0.000673797	0.000617056
1485	0.000646737	0.00062297
1486	0.000622179	0.000628577
1487	0.000599946	0.00063382
1488	0.00057987	0.000638636
1489	0.000561791	0.000642961
1490	0.000545556	0.00064674
1491	0.000531008	0.000649937
1492	0.000517979	0.000652554
1493	0.000506283	0.000654626
1494	0.000495713	0.000656213
1495	0.00048605	0.000657363
1496	0.000477079	0.00065808
1497	0.000468604	0.000658298
1498	0.000460454	0.00065789
1499	0.000452493	0.000656696
1500	0.000444615	0.000654575
1501	0.00043674	0.000651449
1502	0.000428806	0.000647327
1503	0.00042077	0.000642304
1504	0.000412608	0.000636528
1505	0.000404322	0.00063016
1506	0.000395946	0.000623329
1507	0.000387545	0.000616114
1508	0.000379211	0.00060853
1509	0.00037104	0.000600554
1510	0.000363114	0.000592147
1511	0.000355479	0.000583287
1512	0.000348133	0.000573981
1513	0.000341032	0.000564264
1514	0.000334102	0.000554188
1515	0.000327263	0.000543806
1516	0.000320445	0.000533163
1517	0.000313592	0.000522305
1518	0.000306669	0.000511288
1519	0.000299653	0.000500187
1520	0.00029253	0.000489104
1521	0.000285301	0.000478149
1522	0.000277982	0.00046743
1523	0.000270603	0.000457033
1524	0.000263209	0.000447016
1525	0.000255855	0.000437405
1526	0.000248596	0.000428202
1527	0.000241483	0.000419388
1528	0.000234555	0.000410938
1529	0.000227837	0.000402823
1530	0.000221339	0.000395029
1531	0.000215053	0.000387558
1532	0.000208961	0.00038043
1533	0.000203042	0.000373665
1534	0.000197288	0.000367265
1535	0.000191706	0.0003612
1536	0.00018632	0.000355417
1537	0.000181149	0.000349879
1538	0.000176202	0.000344593
1539	0.000171465	0.000339613
1540	0.000166924	0.000335001
1541	0.000162579	0.000330774
1542	0.000158459	0.000326872
1543	0.000154612	0.000323174
1544	0.000151087	0.000319547
1545	0.00014791	0.000315902
1546	0.000145077	0.000312225
1547	0.000142558	0.000308569
1548	0.00014031	0.00030503
1549	0.000138293	0.000301706
1550	0.000136482	0.000298678
1551	0.000134865	0.000295993
1552	0.000133438	0.00029368
1553	0.000132201	0.000291753
1554	0.000131148	0.000290224
1555	0.00013027	0.000289107
1556	0.000129559	0.00028841
1557	0.000129011	0.000288123
1558	0.000128634	0.000288212
1559	0.000128451	0.000288604
1560	0.000128504	0.000289197
1561	0.000128842	0.000289869
1562	0.000129518	0.0002905
1563	0.000130573	0.000290994
1564	0.000132034	0.000291296
1565	0.000133909	0.000291392
1566	0.000136186	0.000291309
1567	0.00013884	0.000291096
1568	0.000141838	0.000290812
1569	0.000145143	0.000290521
1570	0.000148715	0.000290282
1571	0.000152515	0.000290156
1572	0.000156502	0.0002902
1573	0.000160637	0.000290476
1574	0.000164883	0.00029105
1575	0.0001692	0.000292004
1576	0.000173546	0.000293434
1577	0.000177884	0.000295436
1578	0.000182199	0.000298065
1579	0.000186515	0.000301288
1580	0.000190903	0.000304961
1581	0.000195452	0.000308893
1582	0.00020021	0.00031298
1583	0.000205122	0.000317337
1584	0.00021001	0.000322321
1585	0.000214662	0.000328364
1586	0.000219018	0.000335619
1587	0.000223335	0.000343666
1588	0.000228121	0.000351632
1589	0.000233784	0.000358803
1590	0.000240292	0.000365207
1591	0.000247217	0.000371554
1592	0.000254095	0.000378626
1593	0.000260723	0.000386779
1594	0.000267167	0.000395932
1595	0.000273603	0.00040583
1596	0.000280199	0.000416257
1597	0.000287078	0.000427087
1598	0.000294339	0.000438255
1599	0.000302069	0.000449729
1600	0.00031035	0.0004615
1601	0.000319256	0.000473575
1602	0.000328847	0.000485976
1603	0.00033917	0.000498742
1604	0.000350251	0.000511917
1605	0.000362097	0.000525543
1606	0.000374698	0.000539648
1607	0.00038802	0.000554241
1608	0.000402013	0.000569302
1609	0.000416604	0.000584782
1610	0.000431698	0.00060061
1611	0.00044718	0.000616696
1612	0.000462916	0.00063294
1613	0.000478763	0.000649243
1614	0.000494574	0.000665508
1615	0.000510213	0.000681648
1616	0.000525562	0.000697592
1617	0.000540535	0.00071329
1618	0.000555076	0.000728715
1619	0.000569164	0.000743871
1620	0.000582809	0.000758791
1621	0.000596048	0.000773532
1622	0.000608938	0.000788165
1623	0.000621551	0.000802766
1624	0.000633966	0.000817406
1625	0.000646268	0.000832139
1626	0.000658541	0.000846996
1627	0.000670868	0.000861973
1628	0.000683326	0.000877019
1629	0.000695985	0.000892025
1630	0.000708903	0.000906818
1631	0.000722124	0.00092116
1632	0.000735672	0.000934766
1633	0.000749551	0.000947339
1634	0.000763743	0.00095861
1635	0.000778213	0.000968385
1636	0.000792908	0.000976568
1637	0.000807769	0.000983174
1638	0.000822733	0.000988307
1639	0.00083775	0.000992135
1640	0.000852796	0.000994855
1641	0.000867891	0.000996655
1642	0.000883113	0.000997688
1643	0.000898602	0.000998043
1644	0.000914557	0.000997709
1645	0.000931218	0.00099657
1646	0.000948834	0.000994407
1647	0.000967631	0.00099095
1648	0.000987785	0.000985962
1649	0.0010094	0.000979315
1650	0.00103253	0.000970988
1651	0.00105726	0.000960941
1652	0.00108376	0.000948945
1653	0.00111229	0.00093458
1654	0.00114311	0.00091751
1655	0.00117633	0.000897823
1656	0.00121189	0.000876078
1657	0.00124971	0.000853002
1658	0.00128985	0.000829151
1659	0.00133251	0.000804822
1660	0.00137804	0.000780214
1661	0.00142696	0.000755874
1662	0.00148021	0.000733239
1663	0.00153853	0.000713416
1664	0.00160048	0.000693304
1665	0.00166336	0.000667303
1666	0.0017275	0.000636092
1667	0.00179573	0.000605399
1668	0.00186909	0.000577407
1669	0.00194688	0.000550688
1670	0.00202846	0.000523958
1671	0.00211366	0.000496826
1672	0.00220245	0.000469275
1673	0.00229478	0.000441417
1674	0.00239053	0.000413414
1675	0.00248945	0.000385394
1676	0.00259118	0.00035738
1677	0.00269521	0.000329245
1678	0.00280098	0.00030074
1679	0.00290794	0.000271586
1680	0.00301563	0.000241589
1681	0.00312377	0.000210727
1682	0.00323216	0.000179171
1683	0.00334072	0.000147237
1684	0.00344931	0.000115302
1685	0.0035577	8.37302e-05
1686	0.0036655	5.2818e-05
1687	0.00377224	2.27867e-05
1688	0.00387234	0
1689	0.00395274	0
1690	0.00403142	0
1691	0.00410793	0
1692	0.00418188	0
1693	0.00425291	0
1694	0.0043207	0
1695	0.00438492	0
1696	0.00444529	0
1697	0.00450153	0
1698	0.00455342	0
1699	0.00460077	0
1700	0.00464345	0
1701	0.00468138	0
1702	0.00471453	0
1703	0.0047429	0
1704	0.00476649	0
1705	0.00478528	0
1706	0.00479919	0
1707	0.0048081	0
1708	0.00481184	0
1709	0.00481022	0
1710	0.00480309	0
1711	0.00479042	0
1712	0.0047723	0
1713	0.00474902	0
1714	0.00472101	0
1715	0.00468882	0
1716	0.00465304	0
1717	0.00461426	0
1718	0.00457298	0
1719	0.00452952	0
1720	0.00448398	0
1721	0.00443612	0
1722	0.00438534	0
1723	0.00433072	0
1724	0.00427122	0
1725	0.00420598	0
1726	0.0041346	0
1727	0.00405739	0
1728	0.00396983	6.83111e-06
1729	0.00386909	2.59595e-05
1730	0.00376643	4.58161e-05
1731	0.00366374	6.63998e-05
1732	0.00356276	8.75386e-05
1733	0.00346485	0.000108847
1734	0.00337094	0.00012977
1735	0.00328149	0.000149763
1736	0.00319653	0.000168529
1737	0.00311577	0.000186135
1738	0.00303878	0.000202906
1739	0.00296511	0.000219213
1740	0.00289441	0.000235304
1741	0.00282636	0.000251291
1742	0.00276072	0.000267208
1743	0.00269721	0.00028308
1744	0.0026356	0.000298933
1745	0.00257563	0.000314768
1746	0.00251716	0.000330496
1747	0.00246009	0.000345888
1748	0.00240444	0.000360548
1749	0.00235032	0.000373966
1750	0.00229789	0.000385615
1751	0.00224725	0.000395097
1752	0.00219841	0.000402247
1753	0.00215126	0.000407177
1754	0.00210562	0.00041023
1755	0.00206126	0.000411869
1756	0.00201802	0.000412561
1757	0.00197585	0.00041268
1758	0.0019348	0.000412478
1759	0.00189501	0.000412088
1760	0.00185665	0.000411558
1761	0.00181989	0.000410894
1762	0.00178485	0.000410089
1763	0.00175161	0.000409151
1764	0.00172017	0.000408121
1765	0.00169049	0.000407078
1766	0.00166249	0.000406141
1767	0.00163602	0.000405454
1768	0.00161093	0.000405176
1769	0.00158703	0.000405454
1770	0.00156412	0.000406411
1771	0.00154202	0.000408134
1772	0.00152052	0.000410667
1773	0.00149946	0.000414018
1774	0.00147868	0.000418167
1775	0.00145807	0.000423086
1776	0.00143759	0.000428756
1777	0.00141722	0.000435171
1778	0.00139693	0.000442319
1779	0.00137651	0.000450131
1780	0.0013556	0.000458432
1781	0.0013337	0.00046692
1782	0.00131038	0.000475211
1783	0.00128559	0.000482923
1784	0.00125968	0.000489753
1785	0.00123324	0.000495507
1786	0.00120684	0.000500092
1787	0.00118085	0.000503518
1788	0.00115542	0.000505913
1789	0.00113059	0.000507542
1790	0.00110639	0.000508776
1791	0.00108286	0.000509992
1792	0.00105998	0.000511414
1793	0.00103765	0.000512972
1794	0.00101563	0.000514278
1795	0.000993646	0.000514771
1796	0.000971496	0.000513985
1797	0.00094913	0.00051179
1798	0.000926692	0.000508469
1799	0.000904456	0.000504595
1800	0.00088272	0.000500784
1801	0.00086173	0.00049748
1802	0.000841647	0.000494859
1803	0.00082257	0.000492859
1804	0.00080456	0.000491278
1805	0.000787656	0.000489862
1806	0.000771851	0.00048836
1807	0.000757076	0.000486553
1808	0.000743173	0.000484286
1809	0.000729911	0.000481511
1810	0.00071701	0.000478334
1811	0.000704185	0.000475042
1812	0.000691222	0.00047205
1813	0.000678066	0.00046974
1814	0.000664918	0.000468253
1815	0.00065227	0.000467333
1816	0.000640788	0.000466387
1817	0.000631067	0.000464786
1818	0.000623353	0.000462251
1819	0.000617416	0.00045906
1820	0.000612673	0.000455922
1821	0.00060847	0.000453629
1822	0.000604355	0.000452699
1823	0.000600189	0.00045324
1824	0.000596092	0.000455025
1825	0.000592318	0.000457674
1826	0.000589122	0.000460825
1827	0.000586696	0.000464226
1828	0.000585133	0.000467763
1829	0.000584429	0.000471445
1830	0.000584487	0.000475377
1831	0.000585126	0.000479728
1832	0.000586098	0.000484688
1833	0.000587129	0.000490398
1834	0.000588001	0.000496827
1835	0.000588634	0.000503647
1836	0.000589111	0.000510226
1837	0.000589573	0.000515838
1838	0.000590037	0.000520005
1839	0.000590289	0.000522716
1840	0.000589965	0.00052432
1841	0.000588747	0.000525202
1842	0.000586532	0.000525503
1843	0.000583454	0.000525066
1844	0.000579783	0.000523568
1845	0.000575806	0.000520692
1846	0.000571735	0.000516244
1847	0.000567662	0.00051021
1848	0.000563556	0.000502759
1849	0.000559282	0.000494207
1850	0.000554651	0.000484964
1851	0.000549458	0.000475468
1852	0.000543538	0.000466129
1853	0.000536784	0.00045729
1854	0.000529166	0.000449206
1855	0.000520726	0.000442036
1856	0.00051157	0.00043585
1857	0.000501852	0.000430631
1858	0.000491761	0.000426293
1859	0.000481504	0.000422694
1860	0.000471302	0.000419655
1861	0.000461386	0.000416987
1862	0.000451989	0.000414509
1863	0.000443343	0.00041206
1864	0.000435649	0.000409502
1865	0.000429011	0.000406697
1866	0.000423359	0.000403482
1867	0.000418411	0.000399666
1868	0.000413718	0.000395057
1869	0.000408826	0.000389538
1870	0.000403456	0.000383147
1871	0.00039761	0.000376104
1872	0.000391515	0.000368777
1873	0.000385473	0.000361584
1874	0.000379702	0.00035489
1875	0.000374278	0.000348938
1876	0.000369163	0.000343844
1877	0.00036427	0.000339613
1878	0.00035952	0.000336185
1879	0.000354857	0.000333468
1880	0.000350243	0.000331364
1881	0.000345644	0.000329783
1882	0.000341022	0.00032865
1883	0.000336329	0.000327908
1884	0.000331513	0.000327515
1885	0.000326523	0.000327449
1886	0.00032132	0.000327706
1887	0.000315881	0.000328299
1888	0.000310204	0.000329247
1889	0.000304318	0.000330557
1890	0.000298289	0.000332183
1891	0.000292222	0.000334001
1892	0.000286256	0.000335795
1893	0.000280538	0.000337294
1894	0.000275186	0.000338243
1895	0.000270257	0.000338482
1896	0.000265725	0.000337989
1897	0.000261497	0.00033686
1898	0.000257449	0.000335248
1899	0.000253457	0.000333296
1900	0.00024943	0.0003311
1901	0.000245311	0.000328703
1902	0.000241083	0.000326114
1903	0.000236759	0.000323327
1904	0.00023238	0.000320333
1905	0.000228008	0.000317123
1906	0.000223722	0.000313688
1907	0.000219607	0.00031003
1908	0.00021575	0.000306159
1909	0.000212229	0.000302109
1910	0.000209109	0.000297944
1911	0.000206437	0.00029376
1912	0.000204237	0.000289687
1913	0.000202502	0.000285867
1914	0.000201185	0.000282442
1915	0.00020018	0.00027954
1916	0.000199304	0.000277293
1917	0.000198298	0.000275851
1918	0.000196899	0.000275336
1919	0.000194984	0.000275652
1920	0.000192731	0.000276271
1921	0.000190612	0.000276252
1922	0.000189118	0.000274677
1923	0.000188416	0.000271204
1924	0.000188258	0.00026621
1925	0.000188217	0.000260422
1926	0.000187984	0.000254444
1927	0.000187467	0.0002486
1928	0.000186705	0.000243052
1929	0.000185753	0.00023792
1930	0.000184648	0.000233289
1931	0.000183415	0.000229173
1932	0.000182077	0.000225507
1933	0.000180649	0.000222192
1934	0.000179131	0.00021915
1935	0.000177514	0.00021634
1936	0.000175788	0.000213756
1937	0.000173958	0.000211409
1938	0.000172042	0.000209313
1939	0.000170081	0.000207478
1940	0.000168119	0.000205927
1941	0.000166184	0.000204739
1942	0.000164275	0.000204089
1943	0.000162373	0.000204208
1944	0.00016053	0.000205168
1945	0.000158972	0.000206627
1946	0.000158047	0.000207891
1947	0.000157979	0.00020843
1948	0.00015864	0.000208337
1949	0.000159596	0.000208143
1950	0.000160371	0.000208202
1951	0.000160637	0.000208375
1952	0.000160226	0.000208255
1953	0.000159061	0.00020754
1954	0.000157124	0.000206218
1955	0.000154459	0.000204508
1956	0.00015117	0.000202712
1957	0.000147407	0.000201086
1958	0.000143338	0.000199784
1959	0.000139135	0.000198858
1960	0.000134951	0.000198292
1961	0.000130911	0.000198038
1962	0.00012711	0.000198031
1963	0.000123611	0.000198192
1964	0.000120455	0.00019842
1965	0.00011767	0.000198599
1966	0.00011527	0.000198611
1967	0.000113247	0.000198375
1968	0.000111567	0.000197874
1969	0.00011017	0.00019717
1970	0.000108978	0.000196381
1971	0.000107916	0.000195644
1972	0.000106926	0.00019507
1973	0.000105978	0.00019472
1974	0.000105064	0.000194602
1975	0.000104183	0.000194705
1976	0.000103315	0.000195041
1977	0.000102393	0.000195697
1978	0.00010129	0.000196847
1979	9.98601e-05	0.000198699
1980	9.80285e-05	0.000201334
1981	9.59111e-05	0.000204505
1982	9.38541e-05	0.000207572
1983	9.23142e-05	0.000209699
1984	9.16267e-05	0.000210241
1985	9.1833e-05	0.000209032
1986	9.27034e-05	0.00020636
1987	9.39096e-05	0.000202697
1988	9.51859e-05	0.000198455
1989	9.63778e-05	0.000193918
1990	9.74066e-05	0.00018929
1991	9.82295e-05	0.000184745
1992	9.88289e-05	0.000180408
1993	9.9214e-05	0.000176341
1994	9.94128e-05	0.000172553
1995	9.94464e-05	0.000169047
1996	9.93001e-05	0.000165878
1997	9.8907e-05	0.000163185
[truncated: 2,003 more rows]
[truncated: 69 more columns]

## Sheet: 3 Sources
Reconstructed Source Distributions						Compare Input & Reconstructed Sink Samples					Sink Sample Weights
Age (Ma)	Source 1	Source 2	Source 3				Mean		St. Dev.			Princeton, Bluestone, Hinton	Surprise Canyon3- 06GC149, Surprise_Cyn2, SurpriseC_Cngl	24PL09, 10JM94, 40JM94, 05PL15, 09LB04	Mauch_Chunk	KY-21-SG	Tonka	Stanley, Hot_spring	BC05	09-CM-699	MS11, MS10	MS01, MSGE313	BC01, BC02, CC01	ML01, MP-DZ1	1QZ19	SY-D, Watahomigi, Manakacha1	Tumbling Run, Pottsville Fm, OH-1-SS	Pocohontas, Lee, VA-1-GN	Racoon, Montevallo, Sewanee	KY-18-CB	OH-4-SN	BCRA-01-10	MB1-3, MB2-4, MB2-2, MB2-3, MB2-5, MB2-1, MB1-2, MB1-1	a16, a23, a29, a38, a48, a49, a50	46-1, 46-2	IB_AD, IB_M1, IB_M2	FCB_AD	FCB_A2	FCB_A1	S3	GS01, GS09	MS04, MS05, MS06	MC05, MC17	GS11, GS24	MC20	EC01, RC01, RC19	V01, V10, V18, V20	V22, 25	DMR01, LC01, SP01, CF02
0	0	7.95584e-13	7.75502e-13			Cross-correlation	0.672219	±	0.196016		Weights Source 1	0.022525	0.182434	0.37944	0.0421942	0.103876	0.330223	0.0239876	0.661508	0.050119	0.450629	0.666626	0.830884	0.045951	0.303975	0.298903	0.00348764	0.0563635	0.0299488	0.0868574	0.00780845	0.00940589	0.0772303	0.1054	0.0823175	0.0668638	0.102093	0.112593	0.0253918	0.0708579	0.607695	0	0.56322	1	0.469983	0.73222	0.944083	1	0.955795
1	0	8.15712e-13	7.96394e-13			Likeness	0.710958	±	0.119597		Weights Source 2	0	0.000908109	0	0.00781876	0.00186183	0	0.0744991	0.00590889	0.0241518	0	0	0.0463467	0.00956282	0	0	0.013054	0	0	0	0	0.00760487	0	0	0	0.0031548	0.00746447	0.00301359	0	0.0376683	0	0	0.0102709	0	0.0107419	0.0109291	0	0	0.0442047
2	0	8.36331e-13	8.17839e-13			Kuiper V Value	0.20877	±	0.135096		Weights Source 3	0.977475	0.816657	0.62056	0.949987	0.894262	0.669777	0.901513	0.332584	0.925729	0.549371	0.333374	0.122769	0.944486	0.696025	0.701097	0.983458	0.943636	0.970051	0.913143	0.992192	0.982989	0.92277	0.8946	0.917683	0.929981	0.890442	0.884393	0.974608	0.891474	0.392305	1	0.426509	0	0.519275	0.256851	0.0559167	0	0
3	0	8.57452e-13	8.39853e-13			KS D Value	0.176035	±	0.134676
4	0	8.79088e-13	8.6245e-13								Cross-correlation	0.839373	0.918853	0.0233946	0.736884	0.920553	0.0146078	0.73643	0.456164	0.651047	0.725759	0.751476	0.764466	0.771147	0.519442	0.67055	0.605142	0.719456	0.737607	0.836376	0.829052	0.83357	0.831962	0.834313	0.820823	0.90456	0.842597	0.896518	0.772567	0.854548	0.888953	0.449527	0.847684	0.89378	0.685937	0.635553	0.527741	0.490425	0.768699
5	0	9.01249e-13	8.85644e-13			Number of sink samples	108				Likeness	0.73656	0.850523	0.250938	0.668289	0.835999	0.219037	0.728163	0.559709	0.704335	0.671813	0.716298	0.735396	0.769292	0.708385	0.757242	0.703401	0.642416	0.667254	0.775158	0.737241	0.751979	0.784958	0.837159	0.78185	0.862268	0.77529	0.83594	0.697729	0.807092	0.799756	0.316887	0.777802	0.735894	0.725197	0.72304	0.618439	0.512251	0.673124
6	0	9.2395e-13	9.09451e-13			Mean Cross-correlation of sink samples	0.318				Kuiper V Value	0.241416	0.101717	0.746113	0.255429	0.0878839	0.762735	0.148904	0.260706	0.215076	0.309366	0.152273	0.178597	0.145646	0.23452	0.194168	0.187738	0.340493	0.190961	0.109755	0.219927	0.127485	0.149851	0.131584	0.186774	0.0620174	0.190454	0.0938208	0.166813	0.147073	0.13813	0.621733	0.122261	0.182081	0.163943	0.20677	0.328025	0.446828	0.286022
7	0	9.47201e-13	9.33888e-13			Range Cross-correlation of sink samples	0.962				KS D Value	0.158884	0.0640194	0.744636	0.227553	0.0495849	0.747735	0.127699	0.198557	0.201221	0.158434	0.0983686	0.0964311	0.140285	0.232736	0.191957	0.173877	0.219191	0.0973871	0.0621643	0.200331	0.116923	0.129678	0.0912462	0.115132	0.0417915	0.177122	0.0702827	0.148203	0.102837	0.0877348	0.386524	0.0787668	0.178212	0.0846951	0.154558	0.304531	0.374528	0.280641
8	0	9.71016e-13	9.58969e-13			Mean Kuiper V value of sink samples	0.409
9	0	9.95407e-13	9.84713e-13			Range Kuiper V value of sink samples	0.952
10	0	1.02039e-12	1.01114e-12			Final Residual	0.248057
11	0	1.04597e-12	1.03825e-12			Number of Iterations	160
12	0	1.07218e-12	1.06609e-12
13	0	1.09901e-12	1.09465e-12
14	0	1.12649e-12	1.12397e-12
15	0	1.15463e-12	1.15406e-12
16	0	1.18345e-12	1.18493e-12
17	0	1.21296e-12	1.21662e-12
18	0	1.24318e-12	1.24914e-12
19	0	1.27413e-12	1.28252e-12
20	0	1.30581e-12	1.31676e-12
21	0	1.33825e-12	1.35191e-12
22	0	1.37146e-12	1.38797e-12
23	0	1.40547e-12	1.42498e-12
24	0	1.44029e-12	1.46295e-12
25	0	1.47594e-12	1.50192e-12
26	0	1.51243e-12	1.5419e-12
27	0	1.54979e-12	1.58292e-12
28	0	1.58804e-12	1.62502e-12
29	0	1.6272e-12	1.66821e-12
30	0	1.66728e-12	1.71253e-12
31	0	1.70831e-12	1.758e-12
32	0	1.75031e-12	1.80465e-12
33	0	1.7933e-12	1.85251e-12
34	0	1.83731e-12	1.90162e-12
35	0	1.88235e-12	1.952e-12
36	0	1.92845e-12	2.00369e-12
37	0	1.97564e-12	2.05672e-12
38	0	2.02393e-12	2.11112e-12
39	0	2.07336e-12	2.16693e-12
40	0	2.12394e-12	2.22418e-12
41	0	2.17572e-12	2.28291e-12
42	0	2.2287e-12	2.34316e-12
43	0	2.28292e-12	2.40497e-12
44	0	2.3384e-12	2.46837e-12
45	0	2.39518e-12	2.53341e-12
46	0	2.45329e-12	2.60012e-12
47	0	2.51275e-12	2.66856e-12
48	0	2.57359e-12	2.73875e-12
49	0	2.63584e-12	2.81075e-12
50	0	2.69954e-12	2.8846e-12
51	0	2.76472e-12	2.96035e-12
52	0	2.83141e-12	3.03805e-12
53	0	2.89964e-12	3.11774e-12
54	0	2.96946e-12	3.19948e-12
55	0	3.04089e-12	3.28331e-12
56	0	3.11397e-12	3.36929e-12
57	0	3.18874e-12	3.45748e-12
58	0	3.26523e-12	3.54792e-12
59	0	3.34349e-12	3.64068e-12
60	0	3.42355e-12	3.73582e-12
61	0	3.50546e-12	3.83338e-12
62	0	3.58925e-12	3.93344e-12
63	0	3.67497e-12	4.03606e-12
64	0	3.76266e-12	4.14129e-12
65	0	3.85237e-12	4.24922e-12
66	0	3.94414e-12	4.3599e-12
67	0	4.03802e-12	4.4734e-12
68	0	4.13405e-12	4.5898e-12
69	0	4.23229e-12	4.70916e-12
70	0	4.33279e-12	4.83157e-12
71	0	4.43558e-12	4.9571e-12
72	0	4.54074e-12	5.08582e-12
73	0	4.64831e-12	5.21782e-12
74	0	4.75834e-12	5.35319e-12
75	0	4.8709e-12	5.492e-12
76	0	4.98605e-12	5.63434e-12
77	0	5.10383e-12	5.78031e-12
78	0	5.22431e-12	5.92999e-12
79	0	5.34756e-12	6.08348e-12
80	0	5.47364e-12	6.24087e-12
81	0	5.60262e-12	6.40227e-12
82	0	5.73456e-12	6.56778e-12
83	0	5.86954e-12	6.7375e-12
84	0	6.00761e-12	6.91153e-12
85	0	6.14887e-12	7.09e-12
86	0	6.29339e-12	7.27301e-12
87	0	6.44123e-12	7.46068e-12
88	0	6.59249e-12	7.65313e-12
89	0	6.74725e-12	7.85048e-12
90	0	6.90558e-12	8.05285e-12
91	0	7.06759e-12	8.26039e-12
92	0	7.23336e-12	8.47322e-12
93	0	7.40297e-12	8.69148e-12
94	0	7.57654e-12	8.91531e-12
95	0	7.75415e-12	9.14486e-12
96	0	7.93592e-12	9.38028e-12
97	0	8.12194e-12	9.62171e-12
98	0	8.31232e-12	9.86933e-12
99	0	8.50718e-12	1.01233e-11
100	0	8.70664e-12	1.03838e-11
101	0	8.91081e-12	1.06509e-11
102	0	9.11981e-12	1.09249e-11
103	0	9.33379e-12	1.1206e-11
104	0	9.55287e-12	1.14943e-11
105	0	9.77719e-12	1.179e-11
106	0	1.00069e-11	1.20933e-11
107	0	1.02421e-11	1.24045e-11
108	0	1.0483e-11	1.27237e-11
109	0	1.07298e-11	1.30512e-11
110	0	1.09826e-11	1.33872e-11
111	0	1.12415e-11	1.3732e-11
112	0	1.15068e-11	1.40857e-11
113	0	1.17787e-11	1.44486e-11
114	0	1.20573e-11	1.48211e-11
115	0	1.23429e-11	1.52032e-11
116	0	1.26355e-11	1.55954e-11
117	0	1.29356e-11	1.5998e-11
118	0	1.32433e-11	1.64111e-11
119	0	1.35587e-11	1.68351e-11
120	0	1.38823e-11	1.72704e-11
121	0	1.42141e-11	1.77173e-11
122	0	1.45545e-11	1.81761e-11
123	0	1.49038e-11	1.86473e-11
124	0	1.52655e-11	1.91365e-11
125	0	1.58124e-11	1.99271e-11
126	0	2.28016e-11	3.12692e-11
127	0	1.83806e-10	2.94922e-10
128	0	2.73874e-09	4.48039e-09
129	0	2.92079e-08	4.7843e-08
130	0	2.06484e-07	3.38263e-07
131	0	9.63158e-07	1.57787e-06
132	0	2.96323e-06	4.85446e-06
133	0	6.01273e-06	9.85025e-06
134	0	8.04667e-06	1.31823e-05
135	0	7.10257e-06	1.16357e-05
136	0	4.13595e-06	6.77565e-06
137	0	1.59196e-06	2.60799e-06
138	0	4.13377e-07	6.77201e-07
139	0	9.28752e-08	1.52144e-07
140	0	6.15772e-08	1.00871e-07
141	0	1.07606e-07	1.76277e-07
142	0	1.98792e-07	3.25662e-07
143	0	3.46657e-07	5.67899e-07
144	0	5.67964e-07	9.30453e-07
145	0	8.74186e-07	1.43212e-06
146	0	1.264e-06	2.07072e-06
147	0	1.71691e-06	2.8127e-06
148	0	2.19081e-06	3.58906e-06
149	0	2.62615e-06	4.30226e-06
150	0	2.95727e-06	4.84472e-06
151	0	3.12838e-06	5.12505e-06
152	0	3.10889e-06	5.09312e-06
153	0	2.90233e-06	4.75474e-06
154	0	2.54534e-06	4.16992e-06
155	0	2.09701e-06	3.43547e-06
156	0	1.62297e-06	2.6589e-06
157	0	1.17998e-06	1.93321e-06
158	0	8.05914e-07	1.32045e-06
159	0	5.17066e-07	8.47306e-07
160	0	3.11623e-07	5.10812e-07
161	4.74209e-09	1.75552e-07	2.88432e-07
162	1.33983e-08	9.1395e-08	1.51515e-07
163	2.13302e-08	4.31133e-08	7.34299e-08
164	3.01076e-08	1.70828e-08	3.22112e-08
165	4.20867e-08	3.95942e-09	1.33015e-08
166	6.15279e-08	0	9.46401e-09
167	9.66011e-08	0	2.05878e-08
168	1.61538e-07	4.09771e-09	5.36378e-08
169	2.7824e-07	1.9138e-08	1.2262e-07
170	4.75347e-07	4.79888e-08	2.47163e-07
171	7.81619e-07	9.55797e-08	4.4731e-07
172	1.21321e-06	1.64611e-07	7.34124e-07
173	1.75752e-06	2.5254e-07	1.09797e-06
174	2.36154e-06	3.49417e-07	1.50001e-06
175	2.93416e-06	4.38309e-07	1.87394e-06
176	3.36776e-06	4.99247e-07	2.14149e-06
177	3.57363e-06	5.15719e-07	2.23803e-06
178	3.51584e-06	4.80867e-07	2.13696e-06
179	3.2262e-06	4.0025e-07	1.86058e-06
180	2.79276e-06	2.89726e-07	1.47174e-06
181	2.32886e-06	1.698e-07	1.05158e-06
182	1.9403e-06	5.96114e-08	6.75816e-07
183	1.70594e-06	0	4.00815e-07
184	1.67823e-06	0	2.63981e-07
185	1.89194e-06	0	2.90176e-07
186	2.36208e-06	0	4.90068e-07
187	3.06916e-06	4.59017e-09	8.4955e-07
188	3.93303e-06	9.66806e-08	1.31087e-06
189	4.80961e-06	1.86667e-07	1.7705e-06
190	5.51591e-06	2.41265e-07	2.09703e-06
191	5.89777e-06	2.32558e-07	2.18004e-06
192	5.8983e-06	1.50542e-07	1.9795e-06
193	5.58399e-06	7.89458e-09	1.54461e-06
194	5.10609e-06	0	9.857e-07
195	4.63811e-06	0	4.29822e-07
196	4.27168e-06	0	0
197	3.82157e-06	0	0
198	3.62688e-06	0	0
199	3.61365e-06	0	0
200	3.70562e-06	0	0
201	3.8463e-06	0	0
202	4.00175e-06	0	0
203	4.15431e-06	0	0
204	4.29549e-06	0	0
205	4.42118e-06	0	0
206	4.52913e-06	0	0
207	4.61799e-06	0	0
208	4.687e-06	0	0
209	4.73599e-06	0	0
210	4.76544e-06	0	0
211	4.77657e-06	0	0
212	4.77142e-06	0	0
213	4.75287e-06	0	0
214	4.72464e-06	0	0
215	4.6912e-06	0	0
216	4.65752e-06	0	0
217	4.62877e-06	0	0
218	4.60986e-06	0	0
219	4.60486e-06	0	0
220	4.51616e-06	0	1.17858e-07
221	4.29497e-06	0	4.11668e-07
222	4.06152e-06	1.45196e-07	7.31935e-07
223	3.82027e-06	3.68868e-07	1.07092e-06
224	3.57589e-06	5.97482e-07	1.41788e-06
225	3.33176e-06	8.22004e-07	1.75841e-06
226	3.0913e-06	1.03245e-06	2.07661e-06
227	2.85795e-06	1.2187e-06	2.3563e-06
228	2.63524e-06	1.37141e-06	2.58263e-06
229	2.42678e-06	1.48293e-06	2.7435e-06
230	2.23639e-06	1.54809e-06	2.83085e-06
231	2.06821e-06	1.56465e-06	2.84151e-06
232	1.92695e-06	1.53352e-06	2.77742e-06
233	1.81804e-06	1.45854e-06	2.64534e-06
234	1.74794e-06	1.34594e-06	2.45592e-06
235	1.72425e-06	1.20358e-06	2.22241e-06
236	1.75582e-06	1.04015e-06	1.95916e-06
237	1.85261e-06	8.64415e-07	1.6802e-06
238	2.02535e-06	6.84769e-07	1.39807e-06
239	2.2848e-06	5.09666e-07	1.12332e-06
240	2.6404e-06	3.50151e-07	8.6534e-07
241	3.09774e-06	2.28359e-07	6.36274e-07
242	3.65365e-06	2.01071e-07	4.6214e-07
243	4.28616e-06	4.14947e-07	4.08872e-07
244	4.93708e-06	1.21136e-06	6.31404e-07
245	5.48876e-06	3.27046e-06	1.44095e-06
246	5.75008e-06	7.69857e-06	3.34604e-06
247	5.485e-06	1.58431e-05	6.96751e-06
248	4.5184e-06	2.86105e-05	1.27236e-05
249	2.90513e-06	4.53786e-05	2.0327e-05
250	1.05612e-06	6.31928e-05	2.84138e-05
251	0	7.71867e-05	3.46988e-05
252	0	8.28537e-05	3.71523e-05
253	5.1152e-07	7.85312e-05	3.51087e-05
254	2.64769e-06	6.60336e-05	2.9247e-05
255	5.07968e-06	5.01698e-05	2.18759e-05
256	7.08301e-06	3.56759e-05	1.52011e-05
257	8.25148e-06	2.53135e-05	1.05151e-05
258	8.55307e-06	1.95017e-05	8.02701e-06
259	8.19334e-06	1.71961e-05	7.26792e-06
260	7.44378e-06	1.69878e-05	7.59956e-06
261	6.53735e-06	1.77599e-05	8.51845e-06
262	5.63992e-06	1.88461e-05	9.73021e-06
263	4.86055e-06	1.99328e-05	1.11053e-05
264	4.26835e-06	2.09169e-05	1.26135e-05
265	3.90263e-06	2.18075e-05	1.42776e-05
266	3.77597e-06	2.26779e-05	1.61482e-05
267	3.87296e-06	2.36529e-05	1.82919e-05
268	4.14775e-06	2.49143e-05	2.07876e-05
269	4.52383e-06	2.67089e-05	2.37229e-05
270	4.9012e-06	2.93263e-05	2.71802e-05
271	5.17711e-06	3.30111e-05	3.11964e-05
272	5.28153e-06	3.77974e-05	3.56947e-05
273	5.21856e-06	4.33194e-05	4.0411e-05
274	5.0918e-06	4.87211e-05	4.48713e-05
275	5.08999e-06	5.27973e-05	4.84753e-05
276	5.42481e-06	5.43871e-05	5.06878e-05
277	6.24209e-06	5.28624e-05	5.12617e-05
278	7.54931e-06	4.84358e-05	5.03616e-05
279	9.19827e-06	4.20911e-05	4.85028e-05
280	1.09315e-05	3.5166e-05	4.63302e-05
281	1.24672e-05	2.88363e-05	4.43669e-05
282	1.35843e-05	2.37869e-05	4.28728e-05
283	1.41756e-05	2.01924e-05	4.18677e-05
284	1.42627e-05	1.79246e-05	4.12701e-05
285	1.39768e-05	1.6799e-05	4.10446e-05
286	1.35187e-05	1.6718e-05	4.12768e-05
287	1.31096e-05	1.76832e-05	4.21525e-05
288	1.29409e-05	1.97321e-05	4.38736e-05
289	1.31372e-05	2.28716e-05	4.6564e-05
290	1.37392e-05	2.70397e-05	5.02088e-05
291	1.47148e-05	3.20931e-05	5.46499e-05
292	1.59868e-05	3.78155e-05	5.96345e-05
293	1.74602e-05	4.39592e-05	6.48964e-05
294	1.90265e-05	5.0351e-05	7.02522e-05
295	2.0533e-05	5.70787e-05	7.57067e-05
296	2.17405e-05	6.46886e-05	8.1541e-05
297	2.23281e-05	7.41769e-05	8.82907e-05
298	2.20085e-05	8.65347e-05	9.64981e-05
299	2.06822e-05	0.000102024	0.000106346
300	1.84786e-05	0.000119743	0.000117473
301	1.5825e-05	0.000137284	0.000128789
302	1.37043e-05	0.000150212	0.000138098
303	1.32575e-05	0.000153815	0.000142989
304	1.44289e-05	0.000147695	0.00014343
305	1.57264e-05	0.00013664	0.000142244
306	1.57552e-05	0.0001258	0.000142288
307	1.41807e-05	0.000117403	0.000144568
308	1.12716e-05	0.000111907	0.000148915
309	7.18592e-06	0.000110146	0.000155244
310	2.40015e-06	0.000112141	0.000162891
311	0	0.000112503	0.000167956
312	0	0.000106963	0.000167744
313	1.75695e-06	0.000101279	0.000165632
314	3.54342e-06	0.000102528	0.000166227
315	4.98274e-06	0.000110197	0.00016998
316	6.9786e-06	0.00012088	0.000175624
317	1.0062e-05	0.000132336	0.000182388
318	1.45651e-05	0.000143626	0.000189828
319	2.07614e-05	0.000155082	0.000197676
320	2.87317e-05	0.000167686	0.000205781
321	3.81679e-05	0.000180879	0.000213636
322	4.83478e-05	0.000190925	0.000219955
323	5.83554e-05	0.000193476	0.000223343
324	6.73322e-05	0.000188792	0.000223804
325	7.44362e-05	0.000182892	0.000223277
326	7.85288e-05	0.00018273	0.00022457
327	7.8118e-05	0.000191403	0.000230005
328	7.2131e-05	0.00020768	0.000240515
329	6.12209e-05	0.000227856	0.000254843
330	4.81819e-05	0.00024751	0.000269549
331	3.65184e-05	0.00026314	0.000280794
332	2.84481e-05	0.000273071	0.000286477
333	2.43326e-05	0.000276885	0.000286497
334	2.33377e-05	0.000275075	0.000281882
335	2.39544e-05	0.000269965	0.000274597
336	2.44437e-05	0.000265443	0.000267324
337	2.37493e-05	0.000264317	0.000262149
338	2.22354e-05	0.000265947	0.000259451
339	2.1342e-05	0.000266579	0.000258648
340	2.23032e-05	0.000261909	0.000260442
341	2.50891e-05	0.000250071	0.000267384
342	2.84157e-05	0.000234426	0.000279622
343	3.03439e-05	0.000224188	0.000290616
344	2.8895e-05	0.000228012	0.000292749
345	2.32032e-05	0.000244655	0.000286914
346	1.5038e-05	0.000263891	0.000279176
347	8.26559e-06	0.000276969	0.000270754
348	5.17662e-06	0.000283347	0.000259401
349	3.99692e-06	0.000288313	0.00024669
350	1.45378e-06	0.00029579	0.00023711
351	0	0.000303455	0.000231821
352	0	0.00030697	0.00022944
353	0	0.000304842	0.00022864
354	0	0.000299046	0.000229036
355	0	0.000292893	0.000231059
356	0	0.000288676	0.000235207
357	0	0.00028711	0.000241732
358	0	0.000287754	0.000250543
359	0	0.000289391	0.000261094
360	0	0.000290294	0.000272395
361	0	0.000288697	0.000283247
362	0	0.000283426	0.000292643
363	0	0.000274467	0.000300162
364	0	0.000263282	0.000306238
365	0	0.000252487	0.000312089
366	0	0.000244017	0.000318971
367	0	0.0002364	0.000327012
368	0	0.000225227	0.000335261
369	0	0.000208628	0.000343664
370	0	0.000190444	0.000353912
371	0	0.000174134	0.000366356
372	0	0.000157233	0.000378025
373	0	0.000138692	0.000387496
374	0	0.000124252	0.000397886
375	0	0.000117891	0.00041128
376	0	0.00011625	0.000424651
377	0	0.000113075	0.000432591
378	0	0.000105281	0.000432483
379	0	9.51746e-05	0.000426927
380	0	8.76776e-05	0.000421127
381	0	8.60247e-05	0.00041872
382	0	9.00634e-05	0.000420259
383	0	9.71714e-05	0.000424036
384	0	0.000104084	0.00042757
385	0	0.000108804	0.00042945
386	0	0.000111538	0.000430491
387	0	0.000113819	0.000432919
388	0	0.000116795	0.00043862
389	0	0.000120412	0.000448443
390	0	0.000123686	0.000462447
391	0	0.000125278	0.000479562
392	0	0.000124123	0.000497425
393	0	0.000120372	0.000514656
394	0	0.000116029	0.000533038
395	0	0.000114384	0.000555747
396	0	0.000118588	0.000584318
397	0	0.000130449	0.000617639
398	0	0.00015024	0.000652879
399	0	0.000177547	0.000687679
400	0	0.000212102	0.000721674
401	0	0.000253623	0.000755626
402	0	0.000300996	0.000789878
403	0	0.000351927	0.000824693
404	0	0.000403432	0.000861246
405	0	0.000452765	0.000900735
406	0	0.000498288	0.000942846
407	0	0.000539931	0.000986492
408	0	0.000579009	0.00103201
409	0	0.000617422	0.00108067
410	0	0.000656853	0.00113166
411	0	0.000698457	0.00118172
412	0	0.000742405	0.00122793
413	0	0.000786539	0.00126961
414	0	0.000825067	0.00130649
415	0	0.000850054	0.00133695
416	0	0.000856527	0.00135952
417	0	0.000846473	0.00137508
418	0	0.000826487	0.00138611
419	0	0.00080204	0.00139456
420	0	0.000775287	0.00140162
421	0	0.000747186	0.0014091
422	0	0.000719542	0.00141957
423	0	0.000693753	0.00143386
424	0	0.000667244	0.00144796
425	0	0.000633593	0.00145462
426	2.06374e-05	0.000585612	0.00144548
427	3.92585e-05	0.000531792	0.0014268
428	5.56292e-05	0.000480211	0.00140372
429	6.8802e-05	0.000435004	0.00138126
430	7.84201e-05	0.000394448	0.00136137
431	8.56826e-05	0.000355365	0.00134274
432	9.14836e-05	0.000317234	0.00132374
433	9.51652e-05	0.000281964	0.00130415
434	9.52598e-05	0.000251608	0.00128431
435	9.09606e-05	0.000226775	0.00126376
436	8.30172e-05	0.000206074	0.00124115
437	7.33976e-05	0.000186688	0.00121526
438	6.38187e-05	0.000166439	0.00118624
439	5.43642e-05	0.000146329	0.00115577
440	4.33465e-05	0.000131702	0.0011264
441	2.90484e-05	0.000128492	0.00109975
442	1.33781e-05	0.000132175	0.00107242
443	2.52639e-07	0.00013106	0.00103947
444	0	0.000124396	0.00100326
445	0	0.000120807	0.000973085
446	0	0.000120127	0.000949656
447	0	0.000121071	0.00093088
448	0	0.000123817	0.000914987
449	0	0.000128422	0.000900863
450	0	0.000134309	0.000887875
451	0	0.000140693	0.000875808
452	0	0.000147176	0.000865108
453	0	0.000153933	0.000857001
454	0	0.000161184	0.000852793
455	0	0.000168412	0.000852384
456	0	0.000174342	0.000853177
457	0	0.000178111	0.000851042
458	0	0.000180582	0.000843441
459	0	0.000184182	0.000831807
460	0	0.000190511	0.000819985
461	0	0.000197622	0.00080989
462	0	0.000201454	0.000799411
463	0	0.00020159	0.000784985
464	0	0.000203269	0.000765161
465	0	0.000212021	0.000741272
466	0	0.000228716	0.000716056
467	0	0.000250647	0.00069244
468	0	0.000274959	0.000672607
469	0	0.000300214	0.000657101
470	0	0.000326122	0.000644416
471	0	0.000352913	0.000631547
472	0	0.000381043	0.000615465
473	0	0.000411096	0.0005948
474	0	0.000443602	0.000570572
475	0	0.000478677	0.000545366
476	0	0.000515668	0.000521622
477	0	0.000553127	0.000500373
478	0	0.000589291	0.000481157
479	0	0.000622947	0.000462858
480	0	0.000654244	0.000444672
481	0	0.000684869	0.000426593
482	0	0.000717274	0.000409185
483	0	0.000753276	0.000392879
484	0	0.000793187	0.000377481
485	0	0.000836498	0.000362485
486	0	0.000883456	0.000347799
487	0	0.00093563	0.000333919
488	0	0.00099495	0.000321325
489	0	0.00106257	0.00030996
490	0	0.00113866	0.000299349
491	0	0.00122287	0.000289014
492	0	0.00131489	0.000278693
493	1.29764e-05	0.00141256	0.00026569
494	2.82773e-05	0.00151885	0.000252164
495	4.51744e-05	0.00163587	0.00023832
496	6.34913e-05	0.00176637	0.000224303
497	8.29726e-05	0.00191341	0.000210293
498	0.000103359	0.00207991	0.000196426
499	0.000124453	0.00226832	0.000182718
500	0.000146149	0.00248052	0.000169053
501	0.000168419	0.0027178	0.000155237
502	0.000191275	0.00298106	0.00014109
503	0.000214737	0.00327088	0.000126506
504	0.000238808	0.0035877	0.000111464
505	0.000263466	0.00393194	9.59825e-05
506	0.000288649	0.00430436	8.00624e-05
507	0.000314227	0.00470641	6.36654e-05
508	0.000339956	0.00514065	4.67453e-05
509	0.000365427	0.00561108	2.93092e-05
510	0.000390069	0.00612311	1.14621e-05
511	0.000407696	0.00667943	0
512	0.00041352	0.00728432	0
513	0.000416467	0.00795163	0
514	0.000415947	0.00868812	0
515	0.000411387	0.00949969	0
516	0.000402248	0.0103907	0
517	0.000388051	0.0113628	0
518	0.000368423	0.0124135	0
519	0.000343162	0.0135345	0
520	0.000312316	0.0147111	0
521	0.00027623	0.0159235	0
522	0.000235511	0.0171496	0
523	0.000190896	0.0183687	0
524	0.000143112	0.0195647	0
525	9.27942e-05	0.0207263	0
526	4.05267e-05	0.021845	0
527	0	0.0229067	0
528	0	0.0238876	0
529	0	0.0247839	0
530	0	0.0255737	0
531	0	0.0262325	0
532	0	0.0267305	0
533	0	0.0270253	0
534	0	0.0270527	0
535	0	0.0267287	0
536	0	0.0259698	0
537	0	0.0247423	0
538	0	0.0231179	0
539	0	0.0212792	0
540	0	0.0194405	0
541	0	0.0177131	3.16841e-05
542	0	0.0161478	7.08895e-05
543	0	0.0147262	0.000106085
544	0	0.0134232	0.000137301
545	0	0.0122338	0.00016431
546	0	0.0111579	0.000186991
547	0	0.0101887	0.000205595
548	0	0.00931323	0.000220744
549	0	0.0085184	0.000233306
550	0	0.00779443	0.000244244
551	0	0.00713436	0.000254415
552	0	0.00653269	0.00026438
553	0	0.00598427	0.000274289
554	0	0.00548402	0.000283912
555	0	0.00502713	0.000292797
556	0	0.00460945	0.000300508
557	0	0.00422772	0.00030689
558	0	0.00387979	0.000312283
559	0	0.00356438	0.000317501
560	0	0.00328024	0.000323422
561	0	0.00302468	0.000330312
562	0	0.00279328	0.000337537
563	0	0.00258168	0.000344185
564	0	0.00238804	0.000349948
565	0	0.00221305	0.000355094
566	0	0.00205767	0.000359643
567	0	0.0019212	0.000362997
568	0	0.00180146	0.000364487
569	0	0.00169594	0.000364086
570	0	0.00160253	0.00036255
571	0	0.00151981	0.000361045
572	0	0.00144693	0.00036068
573	0	0.00138344	0.000362251
574	0	0.00132902	0.000366183
575	0	0.00128318	0.000372575
576	0	0.00124517	0.000381233
577	0	0.00121397	0.000391716
578	0	0.00118834	0.000403417
579	0	0.00116701	0.000415694
580	0	0.00114887	0.000428021
581	0	0.00113302	0.000440074
582	0	0.0011188	0.000451702
583	0	0.00110569	0.000462812
584	0	0.0010932	0.000473249
585	0	0.00108088	0.000482768
586	0	0.00106832	0.000491119
587	0	0.00105534	0.000498186
588	0	0.00104199	0.000504083
589	0	0.00102853	0.000509117
590	0	0.00101531	0.000513635
591	0	0.00100259	0.000517823
592	0	0.000990443	0.000521591
593	0	0.000978761	0.000524609
594	0	0.000967399	0.000526493
595	0	0.000956347	0.000527049
596	0	0.000945844	0.000526429
597	0	0.000936365	0.00052513
598	0	0.000928489	0.00052384
599	0	0.000922722	0.000523223
600	0	0.000919342	0.000523748
601	0	0.00091833	0.000525618
602	0	0.000919366	0.000528811
603	0	0.000921908	0.000533157
604	0	0.000925286	0.00053843
605	0	0.000928833	0.000544398
606	0	0.000932	0.000550846
607	0	0.000934449	0.000557575
608	0	0.0009361	0.000564395
609	0	0.000937114	0.000571148
610	0	0.000937794	0.000577745
611	0	0.000938382	0.000584168
612	0	0.000938708	0.000590357
613	0	0.000937817	0.00059594
614	0	0.000933859	0.00059995
615	0	0.000924617	0.000600839
616	0	0.000908638	0.000597013
617	0	0.000886326	0.000587702
618	0	0.000860085	0.000573585
619	0	0.000833263	0.000556666
620	0	0.000808635	0.000539444
621	0	0.000787486	0.000523922
622	0	0.000769653	0.000511006
623	0	0.000754044	0.000500435
624	0	0.000739042	0.000491065
625	0	0.000722828	0.000481354
626	0	0.000703938	0.00046995
627	0	0.00068196	0.000456227
628	0	0.000657823	0.000440486
629	0	0.000633307	0.000423712
630	0	0.000610148	0.000407077
631	0	0.00058935	0.000391519
632	0	0.000571035	0.000377561
633	0	0.000554714	0.000365357
634	0	0.000539703	0.000354831
635	0	0.000525478	0.000345791
636	0	0.000511823	0.000337986
637	0	0.000498754	0.000331089
638	0	0.000486313	0.000324682
639	0	0.00047441	0.000318304
640	0	0.0004628	0.000311555
641	0	0.000451194	0.00030421
642	0	0.000439379	0.000296258
643	0	0.000427267	0.000287852
644	0	0.00041487	0.000279205
645	0	0.000402245	0.000270507
646	0	0.00038946	0.000261899
647	0	0.000376591	0.000253495
648	0	0.000363723	0.00024542
649	0	0.000350951	0.000237827
650	0	0.000338356	0.000230873
651	0	0.000325968	0.000224663
652	0	0.000313728	0.000219174
653	0	0.000301475	0.000214219
654	0	0.000288982	0.000209472
655	0	0.000276033	0.000204573
656	0	0.000262516	0.000199259
657	0	0.000248482	0.000193457
658	0	0.000234147	0.000187291
659	0	0.000219824	0.000181002
660	0	0.000205838	0.000174841
661	0	0.000192464	0.00016899
662	0	0.000179894	0.000163549
663	0	0.000168222	0.00015855
664	0	0.000157419	0.000153959
665	0	0.000147302	0.000149665
666	0	0.000137547	0.00014548
667	0	0.000127805	0.000141179
668	0	0.000117877	0.000136597
669	0	0.000107863	0.000131712
670	0	9.81472e-05	0.000126662
671	0	8.9226e-05	0.000121669
672	0	8.14814e-05	0.000116935
673	0	7.50525e-05	0.00011257
674	0	6.98484e-05	0.00010859
675	0	6.56539e-05	0.000104961
676	0	6.22419e-05	0.000101635
677	0	5.94374e-05	9.85755e-05
678	0	5.71322e-05	9.57584e-05
679	0	5.52704e-05	9.31681e-05
680	0	5.38263e-05	9.0792e-05
681	0	5.27869e-05	8.86176e-05
682	0	5.21394e-05	8.66314e-05
683	0	5.18652e-05	8.48178e-05
684	0	5.19373e-05	8.3158e-05
685	0	5.23204e-05	8.16301e-05
686	0	5.29733e-05	8.02106e-05
687	0	5.38537e-05	7.88799e-05
688	0	5.49262e-05	7.76298e-05
689	0	5.61733e-05	7.64768e-05
690	0	5.761e-05	7.54759e-05
691	0	5.92943e-05	7.47328e-05
692	0	6.13288e-05	7.44006e-05
693	0	6.38388e-05	7.46519e-05
694	0	6.6923e-05	7.56183e-05
695	0	7.05839e-05	7.7307e-05
696	0	7.46632e-05	7.95288e-05
697	0	7.8819e-05	8.18786e-05
698	0	8.2573e-05	8.38005e-05
699	0	8.54258e-05	8.47334e-05
700	0	8.70025e-05	8.42853e-05
701	0	8.71666e-05	8.23626e-05
702	0	8.60549e-05	7.91977e-05
703	0	8.40187e-05	7.5263e-05
704	0	8.15029e-05	7.11147e-05
705	0	7.89176e-05	6.72355e-05
706	0	7.65498e-05	6.39351e-05
707	0	7.45372e-05	6.13284e-05
708	0	7.28929e-05	5.93772e-05
709	0	7.15568e-05	5.79583e-05
710	0	7.04456e-05	5.69261e-05
711	0	6.94882e-05	5.6152e-05
712	0	6.86424e-05	5.55411e-05
713	0	6.78972e-05	5.50321e-05
714	0	6.72679e-05	5.45908e-05
715	0	6.67866e-05	5.42016e-05
716	0	6.64931e-05	5.38607e-05
717	0	6.64259e-05	5.35707e-05
718	0	6.66144e-05	5.33373e-05
719	0	6.70732e-05	5.31661e-05
720	0	6.77977e-05	5.30614e-05
721	0	6.8762e-05	5.30245e-05
722	0	6.99191e-05	5.30528e-05
723	0	7.12023e-05	5.31401e-05
724	0	7.25297e-05	5.32763e-05
725	0	7.38093e-05	5.34483e-05
726	0	7.49456e-05	5.3641e-05
727	0	7.58473e-05	5.38384e-05
728	0	7.6434e-05	5.40256e-05
729	0	7.66431e-05	5.41894e-05
730	0	7.64347e-05	5.43199e-05
731	0	7.57951e-05	5.44116e-05
732	0	7.4738e-05	5.44633e-05
733	0	7.33039e-05	5.44788e-05
734	0	7.15571e-05	5.44657e-05
735	0	6.95818e-05	5.44355e-05
736	0	6.74765e-05	5.44023e-05
737	0	6.53478e-05	5.43812e-05
738	0	6.33044e-05	5.43878e-05
739	0	6.14512e-05	5.44367e-05
740	0	5.98836e-05	5.45406e-05
741	0	5.86832e-05	5.47092e-05
742	0	5.79138e-05	5.4949e-05
743	0	5.76191e-05	5.52627e-05
744	0	5.78209e-05	5.56491e-05
745	0	5.8519e-05	5.61035e-05
746	0	5.96924e-05	5.66179e-05
747	0	6.13012e-05	5.71821e-05
748	0	6.329e-05	5.7785e-05
749	0	6.55926e-05	5.84155e-05
750	0	6.81368e-05	5.90645e-05
751	0	7.08498e-05	5.9726e-05
752	0	7.36633e-05	6.03987e-05
753	0	7.65184e-05	6.10863e-05
754	0	7.93684e-05	6.17985e-05
755	0	8.21813e-05	6.255e-05
756	0	8.49392e-05	6.33594e-05
757	0	8.76355e-05	6.42467e-05
758	0	9.02696e-05	6.52304e-05
759	0	9.28388e-05	6.63225e-05
760	0	9.53285e-05	6.75238e-05
761	0	9.77016e-05	6.88192e-05
762	0	9.98909e-05	7.01742e-05
763	0	0.000101796	7.15336e-05
764	0	0.000103286	7.2824e-05
765	0	0.000104214	7.39607e-05
766	0	0.000104437	7.48569e-05
767	0	0.000103842	7.54371e-05
768	0	0.000102366	7.56482e-05
769	0	0.000100022	7.54696e-05
770	0	9.68992e-05	7.49168e-05
771	0	9.3159e-05	7.40396e-05
772	0	8.90156e-05	7.29148e-05
773	0	8.47075e-05	7.16345e-05
774	0	8.04673e-05	7.02941e-05
775	0	7.64948e-05	6.89814e-05
776	0	7.2939e-05	6.77694e-05
777	0	6.98903e-05	6.67128e-05
778	0	6.73827e-05	6.5847e-05
779	0	6.54035e-05	6.5188e-05
780	0	6.39065e-05	6.47308e-05
781	0	6.28259e-05	6.44473e-05
782	0	6.20886e-05	6.42848e-05
783	0	6.16223e-05	6.41687e-05
784	0	6.13603e-05	6.40107e-05
785	0	6.12437e-05	6.37246e-05
786	0	6.12207e-05	6.3244e-05
787	0	6.12471e-05	6.25386e-05
788	0	6.12859e-05	6.16207e-05
789	0	6.13084e-05	6.05417e-05
790	0	6.12953e-05	5.93771e-05
791	0	6.1237e-05	5.82089e-05
792	0	6.11312e-05	5.71077e-05
793	0	6.09806e-05	5.61228e-05
794	0	6.07885e-05	5.5279e-05
795	0	6.0556e-05	5.45809e-05
796	0	6.02806e-05	5.4019e-05
797	0	5.99559e-05	5.35775e-05
798	0	5.95738e-05	5.32395e-05
799	0	5.91271e-05	5.29907e-05
800	0	5.86109e-05	5.28206e-05
801	0	5.80249e-05	5.27232e-05
802	0	5.73733e-05	5.26958e-05
803	0	5.66647e-05	5.27388e-05
804	0	5.59113e-05	5.28546e-05
805	0	5.51276e-05	5.3047e-05
806	0	5.43295e-05	5.33204e-05
807	0	5.35331e-05	5.36797e-05
808	0	5.27542e-05	5.41293e-05
809	0	5.20076e-05	5.46727e-05
810	0	5.1307e-05	5.53118e-05
811	0	5.06644e-05	5.60461e-05
812	0	5.00901e-05	5.68721e-05
813	0	4.95925e-05	5.7782e-05
814	0	4.9178e-05	5.87642e-05
815	0	4.88518e-05	5.98031e-05
816	0	4.86187e-05	6.08807e-05
817	0	4.84848e-05	6.19785e-05
818	0	4.8459e-05	6.30798e-05
819	0	4.85544e-05	6.41718e-05
820	0	4.87894e-05	6.52474e-05
821	0	4.91871e-05	6.63049e-05
822	0	4.97735e-05	6.7347e-05
823	0	5.05737e-05	6.83773e-05
824	0	5.16079e-05	6.93973e-05
825	0	5.28859e-05	7.04027e-05
826	0	5.44028e-05	7.13812e-05
827	0	5.61358e-05	7.23124e-05
828	0	5.80425e-05	7.31693e-05
829	0	6.00617e-05	7.3922e-05
830	0	6.21162e-05	7.45417e-05
831	0	6.41174e-05	7.50048e-05
832	0	6.59716e-05	7.52959e-05
833	0	6.7587e-05	7.54089e-05
834	0	6.88819e-05	7.53476e-05
835	0	6.9792e-05	7.51243e-05
836	0	7.02777e-05	7.47589e-05
837	0	7.0328e-05	7.42773e-05
838	0	6.99631e-05	7.37107e-05
839	0	6.92325e-05	7.30944e-05
840	0	6.82099e-05	7.24669e-05
841	0	6.69857e-05	7.18685e-05
842	0	6.56566e-05	7.13394e-05
843	0	6.43161e-05	7.0917e-05
844	0	6.30454e-05	7.06331e-05
845	0	6.19065e-05	7.05116e-05
846	0	6.09392e-05	7.05656e-05
847	0	6.016e-05	7.07963e-05
848	0	5.9565e-05	7.11924e-05
849	0	5.91335e-05	7.17314e-05
850	0	5.88338e-05	7.23816e-05
851	0	5.86278e-05	7.31057e-05
852	0	5.8477e-05	7.38663e-05
853	0	5.83457e-05	7.46299e-05
854	0	5.82044e-05	7.53724e-05
855	0	5.80314e-05	7.60821e-05
856	0	5.78132e-05	7.6762e-05
857	0	5.75442e-05	7.74288e-05
858	0	5.72254e-05	7.81118e-05
859	0	5.68626e-05	7.88487e-05
860	0	5.64645e-05	7.96814e-05
861	0	5.60408e-05	8.06525e-05
862	0	5.56012e-05	8.18003e-05
863	0	5.5154e-05	8.31558e-05
864	0	5.47068e-05	8.47396e-05
865	0	5.42665e-05	8.6559e-05
866	0	5.38404e-05	8.86058e-05
867	0	5.34373e-05	9.08553e-05
868	0	5.30682e-05	9.32659e-05
869	0	5.27457e-05	9.57812e-05
870	0	5.24837e-05	9.83343e-05
871	0	5.22949e-05	0.000100854
872	0	5.21891e-05	0.000103273
873	0	5.21698e-05	0.000105537
874	0	5.22331e-05	0.000107612
875	0	5.23661e-05	0.000109492
876	0	5.25485e-05	0.000111195
877	0	5.2754e-05	0.000112766
878	0	5.29542e-05	0.000114267
879	0	5.31222e-05	0.00011577
880	0	5.3237e-05	0.000117345
881	0	5.32856e-05	0.000119057
882	0	5.32653e-05	0.000120952
883	0	5.31837e-05	0.000123065
884	0	5.30568e-05	0.000125412
885	0	5.29075e-05	0.000128001
886	0	5.27625e-05	0.000130832
887	0	5.26496e-05	0.000133901
888	0	5.25954e-05	0.000137205
889	0	5.2623e-05	0.000140741
890	0	5.27515e-05	0.000144506
891	0	5.2994e-05	0.000148497
892	0	5.33574e-05	0.000152703
893	0	5.38412e-05	0.000157112
894	0	5.4437e-05	0.000161703
895	0	5.51278e-05	0.00016645
896	0	5.5888e-05	0.000171324
897	0	5.66833e-05	0.000176293
898	0	5.74731e-05	0.000181324
899	0	5.82118e-05	0.000186387
900	0	5.88528e-05	0.000191454
901	0	5.93516e-05	0.000196499
902	0	5.96697e-05	0.0002015
903	0	5.9778e-05	0.000206435
904	0	5.96589e-05	0.000211289
905	0	5.93075e-05	0.000216045
906	0	5.87314e-05	0.000220696
907	0	5.79489e-05	0.000225237
908	0	5.69865e-05	0.000229672
909	0	5.58755e-05	0.000234014
910	0	5.46491e-05	0.000238284
911	0	5.33389e-05	0.000242515
912	0	5.19728e-05	0.000246745
913	0	5.05737e-05	0.00025102
914	0	4.91589e-05	0.000255382
915	0	4.77403e-05	0.000259874
916	0	4.63253e-05	0.000264528
917	0	4.49177e-05	0.00026937
918	0	4.35183e-05	0.000274414
919	0	4.21259e-05	0.00027967
920	0	4.07376e-05	0.000285141
921	0	3.935e-05	0.000290836
922	0	3.79611e-05	0.000296766
923	0	3.65728e-05	0.000302952
924	0	3.51948e-05	0.000309423
925	0	3.38492e-05	0.000316213
926	0	3.25747e-05	0.000323361
927	0	3.14292e-05	0.000330907
928	0	3.04911e-05	0.000338891
929	0	2.98566e-05	0.000347352
930	0	2.96359e-05	0.000356325
931	0	2.99454e-05	0.000365826
932	0	3.09002e-05	0.000375841
933	0	3.26021e-05	0.000386307
934	0	3.51248e-05	0.000397104
935	0	3.84927e-05	0.000408062
936	0	4.26575e-05	0.000418994
937	0	4.74794e-05	0.000429729
938	0	5.27212e-05	0.000440143
939	0	5.8065e-05	0.000450162
940	0	6.31515e-05	0.000459744
941	0	6.76343e-05	0.000468864
942	0	7.12382e-05	0.000477499
943	0	7.3805e-05	0.000485635
944	0	7.53178e-05	0.000493292
945	0	7.58955e-05	0.000500541
946	0	7.57615e-05	0.000507506
947	0	7.51917e-05	0.00051435
948	0	7.44573e-05	0.00052125
949	0	7.37754e-05	0.000528358
950	0	7.328e-05	0.000535774
951	0	7.30172e-05	0.000543525
952	0	7.29617e-05	0.000551564
953	0	7.3046e-05	0.000559782
954	0	7.31891e-05	0.000568037
955	0	7.33194e-05	0.000576191
956	0	7.33856e-05	0.000584145
957	0	7.33581e-05	0.000591868
958	0	7.32264e-05	0.0005994
959	0	7.29945e-05	0.000606838
960	0	7.26768e-05	0.000614317
961	0	7.22959e-05	0.000621971
962	0	7.18788e-05	0.000629922
963	0	7.14535e-05	0.000638256
964	0	7.10438e-05	0.000647035
965	0	7.06636e-05	0.000656296
966	0	7.03135e-05	0.000666065
967	0	6.99776e-05	0.000676369
968	0	6.96242e-05	0.000687234
969	0	6.92099e-05	0.000698689
970	0	6.86859e-05	0.000710749
971	0	6.80076e-05	0.000723403
972	0	6.71417e-05	0.000736603
973	0	6.60701e-05	0.000750263
974	0	6.47868e-05	0.000764282
975	0	6.32909e-05	0.000778573
976	0	6.15794e-05	0.000793093
977	0	5.96437e-05	0.000807854
978	0	5.74739e-05	0.000822909
979	0	5.50662e-05	0.000838323
980	0	5.24311e-05	0.000854143
981	0	4.95967e-05	0.000870372
982	0	4.66054e-05	0.000886979
983	0	4.35067e-05	0.000903904
984	0	4.03469e-05	0.000921082
985	0	3.71623e-05	0.000938456
986	0	3.39744e-05	0.000955988
987	0	3.07892e-05	0.000973651
988	0	2.75999e-05	0.000991423
989	0	2.43919e-05	0.00100928
990	0	2.11485e-05	0.00102718
991	0	1.78555e-05	0.00104507
992	0	1.45046e-05	0.0010629
993	0	1.10936e-05	0.00108061
994	0	7.62423e-06	0.00109817
995	0	4.09928e-06	0.00111559
996	0	5.18846e-07	0.00113293
997	0	0	0.00115022
998	0	0	0.00116762
999	0	0	0.00118525
1000	0	0	0.00120321
1001	0	0	0.00122157
1002	0	0	0.00124037
1003	0	0	0.00125958
1004	0	0	0.0012792
1005	0	0	0.00129917
1006	0	0	0.00131941
1007	0	0	0.00133986
1008	0	0	0.00136045
1009	0	0	0.0013811
1010	0	0	0.00140178
1011	0	0	0.00142243
1012	0	0	0.00144304
1013	0	0	0.00146362
1014	0	0	0.00148415
1015	0	0	0.00150467
1016	0	0	0.0015252
1017	0	0	0.00154576
1018	0	0	0.00156636
1019	0	0	0.001587
1020	0	0	0.00160766
1021	0	0	0.00162827
1022	0	0	0.00164875
1023	0	0	0.00166897
1024	0	0	0.00168879
1025	0	0	0.00170804
1026	0	0	0.00172657
1027	0	0	0.00174425
1028	0	0	0.00176099
1029	0	0	0.00177676
1030	0	0	0.0017916
1031	0	0	0.00180559
1032	0	0	0.00181888
1033	0	0	0.00183166
1034	0	0	0.0018441
1035	0	0	0.00185637
1036	0	0	0.00186861
1037	0	0	0.00188088
1038	0	0	0.00189321
1039	0	0	0.00190557
1040	0	0	0.00191791
1041	0	0	0.00193019
1042	0	0	0.0019424
1043	0	0	0.00195455
1044	0	0	0.00196663
1045	0	0	0.00197863
1046	0	0	0.00199043
1047	0	0	0.00200189
1048	0	0	0.00201279
1049	0	0	0.00202299
1050	0	0	0.00203241
1051	0	0	0.00204107
1052	0	0	0.00204907
1053	0	0	0.00205655
1054	0	0	0.00206364
1055	0	0	0.00207038
1056	0	0	0.00207678
1057	0	0	0.00208278
1058	0	0	0.00208831
1059	0	0	0.00209329
1060	0	0	0.00209766
1061	0	0	0.00210135
1062	0	0	0.00210434
1063	0	0	0.00210659
1064	0	0	0.00210811
1065	0	0	0.00210891
1066	0	0	0.00210902
1067	0	0	0.0021085
1068	0	0	0.00210744
1069	0	0	0.00210593
1070	0	0	0.00210406
1071	0	0	0.00210191
1072	0	0	0.00209953
1073	0	0	0.00209699
1074	0	0	0.00209432
1075	0	0	0.00209158
1076	0	0	0.00208881
1077	0	0	0.00208598
1078	0	0	0.00208293
1079	0	0	0.00207933
1080	0	0	0.00207468
1081	0	0	0.00206841
1082	0	0	0.00206002
1083	0	0	0.00204929
1084	0	0	0.00203634
1085	0	0	0.00202161
1086	0	0	0.00200567
1087	0	0	0.00198909
1088	0	0	0.0019723
1089	0	0	0.00195554
1090	0	0	0.00193891
1091	0	0	0.00192241
1092	0	0	0.00190607
1093	0	0	0.00188988
1094	0	0	0.00187391
1095	0	0	0.0018582
1096	0	0	0.00184277
1097	0	0	0.00182763
1098	0	0	0.00181274
1099	0	0	0.00179809
1100	0	0	0.00178362
1101	0	0	0.00176933
1102	0	0	0.00175524
1103	0	0	0.00174137
1104	0	0	0.00172781
1105	0	0	0.00171462
1106	0	0	0.00170187
1107	0	0	0.00168963
1108	0	0	0.00167792
1109	0	0	0.00166674
1110	0	0	0.00165607
1111	0	0	0.0016459
1112	0	0	0.00163617
1113	0	0	0.00162687
1114	0	0	0.00161797
1115	0	0	0.00160946
1116	0	0	0.00160132
1117	0	0	0.00159353
1118	0	0	0.00158605
1119	0	0	0.00157882
1120	0	0	0.00157178
1121	0	0	0.0015649
1122	0	0	0.00155814
1123	0	0	0.00155153
1124	0	0	0.00154514
1125	0	0	0.00153907
1126	0	0	0.00153342
1127	0	0	0.0015283
1128	0	0	0.00152378
1129	0	0	0.00151991
1130	0	0	0.00151669
1131	0	0	0.00151411
1132	0	0	0.00151211
1133	0	0	0.00151062
1134	0	0	0.00150954
1135	0	0	0.00150874
1136	0	0	0.00150809
1137	0	0	0.00150748
1138	0	0	0.00150678
1139	0	0	0.0015059
1140	0	0	0.00150474
1141	0	0	0.00150321
1142	0	0	0.00150121
1143	0	0	0.00149862
1144	0	0	0.00149533
1145	0	0	0.00149125
1146	0	0	0.00148633
1147	0	0	0.00148063
1148	0	0	0.00147423
1149	0	0	0.00146731
1150	0	0	0.00146001
1151	0	0	0.00145247
1152	0	0	0.00144476
1153	0	0	0.00143689
1154	0	0	0.00142885
1155	0	0	0.00142061
1156	0	0	0.00141211
1157	0	0	0.00140335
1158	0	0	0.00139433
1159	0	0	0.00138506
1160	0	0	0.00137559
1161	0	0	0.00136594
1162	0	0	0.00135616
1163	0	0	0.00134627
1164	0	0	0.00133626
1165	0	0	0.00132615
1166	0	0	0.00131595
1167	0	0	0.00130565
1168	0	0	0.00129529
1169	0	0	0.00128488
1170	0	0	0.00127445
1171	0	0	0.001264
1172	0	0	0.00125353
1173	0	0	0.00124301
1174	0	0	0.00123239
1175	0	0	0.00122164
1176	0	0	0.00121069
1177	0	0	0.00119952
1178	0	0	0.00118813
1179	0	0	0.00117651
1180	0	0	0.0011647
1181	0	0	0.00115274
1182	0	0	0.00114067
1183	0	0	0.00112856
1184	0	0	0.00111644
1185	0	0	0.00110437
1186	0	0	0.00109238
1187	0	0	0.00108051
1188	0	0	0.00106878
1189	0	0	0.00105721
1190	0	0	0.00104583
1191	0	0	0.00103466
1192	0	0	0.00102372
1193	0	0	0.00101305
1194	0	0	0.00100265
1195	0	0	0.000992566
1196	0	0	0.000982808
1197	0	0	0.000973394
1198	0	0	0.000964336
1199	0	0	0.000955651
1200	0	0	0.000947365
1201	0	0	0.000939516
1202	0	0	0.000932152
1203	0	0	0.00092531
1204	0	0	0.000918991
1205	0	0	0.000913125
1206	0	0	0.000907563
1207	0	0	0.000902112
1208	0	0	0.000896586
1209	0	0	0.000890881
1210	0	0	0.000884996
1211	0	0	0.000879017
1212	0	0	0.000873045
1213	0	0	0.000867137
1214	0	0	0.000861261
1215	0	0	0.00085531
1216	0	0	0.000849141
1217	0	0	0.000842619
1218	0	0	0.000835666
1219	0	0	0.000828274
1220	0	0	0.000820518
1221	0	0	0.000812534
1222	0	0	0.000804501
1223	0	0	0.000796605
1224	0	0	0.000789012
1225	0	0	0.000781845
1226	0	0	0.000775174
1227	0	0	0.000769011
1228	0	0	0.000763316
1229	0	0	0.000758013
1230	0	0	0.000752998
1231	0	0	0.000748152
1232	0	0	0.000743355
1233	0	0	0.000738495
1234	0	0	0.000733488
1235	0	0	0.000728293
1236	0	0	0.000722926
1237	0	0	0.000717464
1238	0	0	0.00071202
1239	0	0	0.000706687
1240	0	0	0.000701456
1241	0	0	0.00069616
1242	0	0	0.000690475
1243	0	0	0.000684018
1244	0	0	0.000676498
1245	0	0	0.000667873
1246	0	0	0.000658403
1247	0	0	0.000648583
1248	0	0	0.000638978
1249	0	0	0.000630053
1250	0	0	0.000622075
1251	0	0	0.000615099
1252	0	0	0.000609035
1253	0	0	0.000603728
1254	0	0	0.000599032
1255	0	0	0.000594852
1256	0	0	0.000591163
1257	0	0	0.00058802
1258	0	0	0.000585531
1259	0	0	0.000583812
1260	0	0	0.000582901
1261	0	0	0.000582674
1262	0	0	0.000582799
1263	0	0	0.000582787
1264	0	0	0.000582145
1265	0	0	0.000580558
1266	0	0	0.000578002
1267	0	0	0.000574718
1268	0	0	0.000571056
1269	0	0	0.000567312
1270	0	0	0.000563629
1271	0	0	0.000560018
1272	0	0	0.000556447
1273	0	0	0.000552917
1274	0	0	0.000549485
1275	0	0	0.000546243
1276	0	0	0.000543263
1277	0	0	0.000540572
1278	0	0	0.000538141
1279	0	0	0.000535907
1280	0	0	0.000533795
1281	0	0	0.000531732
1282	0	0	0.000529666
1283	0	0	0.00052756
1284	0	0	0.000525401
1285	0	0	0.000523189
1286	0	0	0.000520943
1287	5.03004e-07	0	0.000518585
1288	1.13898e-06	0	0.000516228
1289	1.76071e-06	0	0.000513939
1290	2.39496e-06	0	0.000511753
1291	3.0687e-06	0	0.000509701
1292	3.80738e-06	0	0.000507813
1293	4.63344e-06	0	0.000506116
1294	5.56529e-06	0	0.000504638
1295	6.61674e-06	0	0.000503403
1296	7.79716e-06	0	0.000502437
1297	9.11196e-06	0	0.000501765
1298	1.05635e-05	0	0.00050141
1299	1.21522e-05	0	0.000501395
1300	1.38769e-05	0	0.000501737
1301	1.57359e-05	0	0.000502448
1302	1.77265e-05	0	0.000503535
1303	1.98452e-05	0	0.000504995
1304	2.20871e-05	0	0.000506817
1305	2.4445e-05	0	0.000508984
1306	2.69099e-05	0	0.000511472
1307	2.94699e-05	0	0.000514251
1308	3.21117e-05	0	0.000517286
1309	3.48216e-05	0	0.000520541
1310	3.75873e-05	0	0.000523975
1311	4.04007e-05	0	0.000527543
1312	4.3261e-05	0	0.000531196
1313	4.61767e-05	0	0.000534878
1314	4.91673e-05	0	0.000538528
1315	5.22636e-05	0	0.00054208
1316	5.5506e-05	0	0.000545469
1317	5.89419e-05	0	0.000548633
1318	6.26216e-05	0	0.000551522
1319	6.65943e-05	0	0.0005541
1320	7.09037e-05	0	0.000556346
1321	7.5584e-05	0	0.000558255
1322	8.06563e-05	0	0.00055984
1323	8.61264e-05	0	0.000561126
1324	9.19833e-05	0	0.000562153
1325	9.82006e-05	0	0.000562969
1326	0.00010474	0	0.000563628
1327	0.000111554	0	0.000564187
1328	0.000118597	0	0.000564696
1329	0.000125824	0	0.000565193
1330	0.000133199	0	0.000565704
1331	0.000140697	0	0.000566242
1332	0.000148298	0	0.000566803
1333	0.00015599	0	0.000567377
1334	0.000163763	0	0.000567952
1335	0.000171604	0	0.000568516
1336	0.000179493	0	0.000569069
1337	0.0001874	0	0.000569622
1338	0.000195285	0	0.000570202
1339	0.000203098	0	0.000570849
1340	0.000210784	0	0.000571607
1341	0.000218295	0	0.000572512
1342	0.000225603	0	0.000573574
1343	0.000232711	0	0.000574755
1344	0.000239671	0	0.000575953
1345	0.000246583	0	0.000577005
1346	0.000253584	0	0.000577698
1347	0.000260826	0	0.00057781
1348	0.000268441	0	0.000577152
1349	0.000276512	0	0.000575623
1350	0.00028505	0	0.00057323
1351	0.000293994	0	0.000570095
1352	0.000303231	0	0.000566423
1353	0.00031263	0	0.000562459
1354	0.000322071	0	0.000558434
1355	0.000331482	0	0.000554528
1356	0.000340843	0	0.000550857
1357	0.000350189	0	0.000547476
1358	0.000359598	0	0.000544395
1359	0.000369173	0	0.000541604
1360	0.000379035	0	0.000539086
1361	0.000389306	0	0.000536827
1362	0.000400111	0	0.000534824
1363	0.00041157	0	0.000533077
1364	0.000423797	0	0.00053159
1365	0.000436889	0	0.000530357
1366	0.000450927	0	0.000529348
1367	0.000465967	0	0.0005285
1368	0.000482037	0	0.000527701
1369	0.00049914	0	0.000526795
1370	0.000517262	0	0.000525589
1371	0.000536383	0	0.000523882
1372	0.000556496	0	0.000521493
1373	0.000577624	0	0.000518289
1374	0.000599836	0	0.000514206
1375	0.00062326	0	0.000509251
1376	0.000648083	0	0.000503489
1377	0.000674547	0	0.000497021
1378	0.000702934	0	0.000489954
1379	0.000733552	0	0.000482373
1380	0.000766708	0	0.000474331
1381	0.0008027	0	0.000465837
1382	0.000841793	0	0.000456863
1383	0.000884214	0	0.000447363
1384	0.000930151	0	0.000437285
1385	0.000979752	0	0.000426593
1386	0.00103314	0	0.000415269
1387	0.00109042	0	0.000403317
1388	0.0011517	0	0.000390747
1389	0.0012171	0	0.000377562
1390	0.00128677	0	0.000363733
1391	0.00136091	0	0.000349192
1392	0.00143971	0	0.000333834
1393	0.0015234	0	0.000317538
1394	0.00161202	7.84283e-06	0.000300065
1395	0.00170582	1.83797e-05	0.000281441
1396	0.00180493	2.98722e-05	0.0002617
1397	0.00190937	4.22348e-05	0.000240914
1398	0.00201911	5.53539e-05	0.0002192
1399	0.00213406	6.91094e-05	0.000196691
1400	0.00225407	8.33919e-05	0.00017351
1401	0.002379	9.81132e-05	0.000149753
1402	0.00250863	0.000113207	0.000125493
1403	0.00264273	0.000128627	0.000100781
1404	0.00278099	0.000144335	7.56684e-05
1405	0.00292306	0.0001603	5.02108e-05
1406	0.0030685	0.000176492	2.44827e-05
1407	0.00321566	0.00019206	0
1408	0.00334478	0.000193583	0
1409	0.00347569	0.000195265	0
1410	0.00360784	0.000197123	0
1411	0.00374065	0.000199147	0
1412	0.00387352	0.000201287	0
1413	0.00400577	0.000203448	0
1414	0.00413672	0.000205488	0
1415	0.00426566	0.000207243	0
1416	0.00439186	0.000208546	0
1417	0.0045146	0.000209263	0
1418	0.00463316	0.000209316	0
1419	0.00474682	0.000208712	0
1420	0.00485492	0.000207543	0
1421	0.00495681	0.000205998	0
1422	0.00505192	0.000204344	0
1423	0.00513974	0.000202908	0
1424	0.00521985	0.000202043	0
1425	0.00529191	0.000202082	0
1426	0.00535568	0.000203282	0
1427	0.00541099	0.00020577	0
1428	0.0054577	0.000209502	0
1429	0.0054957	0.000214241	0
1430	0.0055249	0.000219576	0
1431	0.00554518	0.000224978	0
1432	0.00555642	0.000229888	0
1433	0.00555849	0.000233814	0
1434	0.00555129	0.000236427	0
1435	0.00553474	0.000237608	0
1436	0.00550884	0.000237462	0
1437	0.00547359	0.000236272	0
1438	0.00542912	0.000234435	0
1439	0.00537555	0.00023238	0
1440	0.00531314	0.000230498	0
1441	0.00524216	0.000229099	0
1442	0.00516299	0.000228385	0
1443	0.00507607	0.00022846	0
1444	0.00498189	0.000229336	0
1445	0.00488101	0.000230969	0
1446	0.00477401	0.000233273	0
1447	0.00466149	0.000236158	0
1448	0.00454403	0.000239541	0
1449	0.00442221	0.000243379	0
1450	0.00429657	0.000247681	0
1451	0.00415477	0.000243551	1.55198e-05
1452	0.00399888	0.000232211	4.47235e-05
1453	0.00384052	0.000221545	7.43372e-05
1454	0.00368035	0.000211706	0.00010438
1455	0.00351917	0.000202708	0.000134834
1456	0.00335793	0.000194345	0.000165588
1457	0.00319775	0.000186178	0.000196385
1458	0.00303978	0.000177633	0.000226823
1459	0.00288514	0.000168198	0.000256414
1460	0.00273472	0.000157621	0.000284673
1461	0.00258916	0.00014602	0.000311215
1462	0.00244883	0.000133822	0.000335811
1463	0.00231393	0.000121589	0.00035841
1464	0.00218459	0.000109814	0.000379121
1465	0.00206096	9.87858e-05	0.000398176
1466	0.00194319	8.85747e-05	0.000415881
1467	0.00183145	7.90861e-05	0.000432555
1468	0.00172583	7.01437e-05	0.000448471
1469	0.00162633	6.15519e-05	0.000463813
1470	0.00153287	5.31293e-05	0.00047868
1471	0.00144525	4.47225e-05	0.000493116
1472	0.00136318	3.621e-05	0.000507144
1473	0.00128641	2.74976e-05	0.000520739
1474	0.00121471	1.85088e-05	0.000533735
1475	0.001148	9.18656e-06	0.000545778
1476	0.00108622	0	0.000556482
1477	0.00102905	0	0.00056558
1478	0.000976401	0	0.000573514
1479	0.000927876	0	0.000580803
1480	0.000883127	0	0.000587879
1481	0.000841911	0	0.000594922
1482	0.00080406	0	0.00060191
1483	0.000769423	0	0.000608752
1484	0.000737835	0	0.000615364
1485	0.00070911	0	0.000621685
1486	0.000683059	0	0.000627659
1487	0.000659494	0	0.00063323
1488	0.000638236	0	0.000638338
1489	0.000619117	0	0.00064292
1490	0.000601973	0	0.000646922
1491	0.000586636	0	0.000650312
1492	0.000572926	0	0.000653092
1493	0.000560639	0	0.000655301
1494	0.000549548	0	0.000657005
1495	0.00053941	0	0.000658255
1496	0.000529982	0	0.000659061
1497	0.000521041	0	0.000659361
1498	0.000512392	0	0.000659029
1499	0.000503882	0	0.000657907
1500	0.000495392	0	0.000655853
1501	0.000486841	0	0.00065279
1502	0.000478172	0	0.000648726
1503	0.000469353	0	0.000643756
1504	0.000460378	0	0.00063803
1505	0.000451263	0	0.000631706
1506	0.000442058	0	0.000624916
1507	0.00043284	0	0.000617734
1508	0.000423708	0	0.000610175
1509	0.000414762	0	0.00060221
1510	0.000406085	0	0.000593802
1511	0.000397719	0	0.000584925
1512	0.000389658	0	0.000575587
1513	0.000381854	0	0.000565828
1514	0.000374236	0	0.0005557
1515	0.000366726	0	0.000545261
1516	0.000359255	0	0.000534558
1517	0.000351771	0	0.000523638
1518	0.000344231	0	0.00051256
1519	0.000336599	0	0.000501404
1520	0.000328848	0	0.000490272
1521	0.000320961	0	0.000479279
1522	0.000312943	0	0.000468533
1523	0.00030482	0	0.000458123
1524	0.000296641	0	0.000448105
1525	0.000288469	0	0.000438503
1526	0.000280374	0	0.000429317
1527	0.000272419	0	0.000420526
1528	0.000264655	0	0.0004121
1529	0.000257116	0	0.00040401
1530	0.000249815	0	0.000396241
1531	0.000242748	0	0.000388795
1532	0.000235896	0	0.000381691
1533	0.000229238	0	0.000374951
1534	0.000222767	0	0.000368577
1535	0.000216494	0	0.000362538
1536	0.000210447	0	0.000356781
1537	0.000204652	0	0.000351266
1538	0.000199116	0	0.000346
1539	0.000193825	0	0.000341039
1540	0.000188755	0	0.000336448
1541	0.000183899	0	0.000332246
1542	0.00017928	0	0.00032837
1543	0.000174944	0	0.000324699
1544	0.000170939	0	0.000321095
1545	0.000167294	0	0.000317469
1546	0.000164006	0	0.000313806
1547	0.000161047	0	0.000310161
1548	0.000158377	0	0.00030663
1549	0.000155962	0	0.000303315
1550	0.000153779	0	0.000300295
1551	0.00015182	0	0.00029762
1552	0.000150086	0	0.000295317
1553	0.00014858	0	0.000293401
1554	0.000147299	0	0.000291883
1555	0.000146235	0	0.000290777
1556	0.00014538	0	0.000290091
1557	0.00014473	0	0.000289816
1558	0.000144294	0	0.000289915
1559	0.000144099	0	0.000290315
1560	0.000144188	0	0.000290911
1561	0.000144616	0	0.000291577
1562	0.000145437	0	0.000292191
1563	0.000146697	0	0.000292654
1564	0.000148421	0	0.00029291
1565	0.000150614	0	0.000292947
1566	0.000153263	0	0.00029279
1567	0.000156338	0	0.00029249
1568	0.000159801	0	0.000292109
1569	0.000163611	0	0.000291713
1570	0.000167725	0	0.000291364
1571	0.000172098	0	0.000291123
1572	0.000176688	0	0.000291051
1573	0.000181453	0	0.00029121
1574	0.00018635	0	0.00029167
1575	0.000191337	0	0.000292515
1576	0.000196365	0	0.000293842
1577	0.000201396	0	0.00029575
1578	0.000206409	0	0.000298296
1579	0.000211433	0	0.000301445
1580	0.000216545	0	0.000305049
1581	0.000221847	0	0.000308913
1582	0.000227392	0	0.000312927
1583	0.000233121	0	0.000317212
1584	0.000238839	0	0.000322136
1585	0.000244315	0	0.000328144
1586	0.000249479	0	0.000335394
1587	0.000254608	0	0.000343448
1588	0.000260252	0	0.000351402
1589	0.000266852	0	0.000358516
1590	0.000274376	0	0.00036482
1591	0.000282359	0	0.000371049
1592	0.000290301	0	0.000378018
1593	0.000297981	0	0.000386094
1594	0.000305471	0	0.000395194
1595	0.000312963	0	0.000405053
1596	0.000320637	0	0.000415447
1597	0.00032863	0	0.000426243
1598	0.00033705	0	0.000437373
1599	0.000345994	0	0.000448804
1600	0.000355552	0	0.000460523
1601	0.000365806	0	0.000472535
1602	0.000376825	0	0.000484863
1603	0.000388659	0	0.000497544
1604	0.000401338	0	0.000510622
1605	0.00041487	0	0.00052414
1606	0.000429242	0	0.000538128
1607	0.000444418	0	0.000552594
1608	0.00046034	0	0.000567519
1609	0.000476927	0	0.000582858
1610	0.00049407	0	0.000598539
1611	0.00051164	0	0.000614473
1612	0.000529484	0	0.000630565
1613	0.00054744	0	0.000646716
1614	0.000565342	0	0.000662832
1615	0.000583036	0	0.000678829
1616	0.000600392	0	0.000694636
1617	0.000617314	0	0.000710204
1618	0.000633742	0	0.000725507
1619	0.000649658	0	0.00074055
1620	0.000665076	0	0.000755365
1621	0.00068004	0	0.000770007
1622	0.000694616	0	0.000784547
1623	0.000708884	0	0.00079906
1624	0.000722935	0	0.000813617
1625	0.000736862	0	0.00082827
1626	0.000750757	0	0.000843047
1627	0.000764714	0	0.000857944
1628	0.000778816	0	0.000872907
1629	0.000793141	0	0.000887824
1630	0.00080775	0	0.000902519
1631	0.000822687	0	0.000916752
1632	0.00083797	0	0.000930235
1633	0.000853592	0	0.000942667
1634	0.000869522	0	0.000953779
1635	0.000885708	0	0.000963375
1636	0.000902085	0	0.00097136
1637	0.000918577	0	0.000977751
1638	0.000935111	0	0.000982656
1639	0.000951626	0	0.000986247
1640	0.00096809	0	0.000988722
1641	0.000984524	0	0.000990276
1642	0.00100102	0	0.00099106
1643	0.00101773	0	0.000991159
1644	0.00103489	0	0.000990559
1645	0.00105278	0	0.000989132
1646	0.00107169	0	0.000986649
1647	0.00109188	0	0.000982829
1648	0.00111354	0	0.000977427
1649	0.00113677	0	0.000970309
1650	0.00116165	0	0.000961453
1651	0.00118823	0	0.000950817
1652	0.00121674	0	0.000938165
1653	0.00124749	0	0.000923062
1654	0.00128081	0	0.000905162
1655	0.00131679	0	0.000884553
1656	0.00135534	0	0.000861805
1657	0.00139634	0	0.000837658
1658	0.00143981	0	0.000812679
1659	0.00148599	0	0.000787162
1660	0.00153528	0	0.000761304
1661	0.00158827	0	0.000735648
1662	0.00164592	0	0.000711646
1663	0.001709	0	0.000690413
1664	0.00177613	0	0.000668801
1665	0.00184463	0	0.000641133
1666	0.00191487	0	0.000608095
1667	0.0019896	0	0.000575497
1668	0.00206986	0	0.000545552
1669	0.00215495	0	0.000516816
1670	0.00224427	0	0.000487989
1671	0.00233766	0	0.000458676
1672	0.00243506	0	0.000428862
1673	0.00253644	0	0.000398663
1674	0.00264164	0	0.000368245
1675	0.00275037	0	0.000337746
1676	0.00286221	0	0.000307197
1677	0.00297657	0	0.000276481
1678	0.00309281	0	0.00024536
1679	0.0032103	0	0.000213563
1680	0.00332856	0	0.000180903
1681	0.00344724	0	0.000147363
1682	0.00356616	0	0.00011312
1683	0.00368521	0	7.8493e-05
1684	0.00380427	0	4.3869e-05
1685	0.00392307	0	9.6201e-06
1686	0.00402085	0	0
1687	0.00411004	0	0
1688	0.00419835	0	0
1689	0.00428527	0	0
1690	0.00437028	0	0
1691	0.00445291	0	0
1692	0.00453271	0	0
1693	0.00460931	0	0
1694	0.00468231	0	0
1695	0.00475139	0	0
1696	0.00481622	0	0
1697	0.00487651	0	0
1698	0.00493199	0	0
1699	0.00498247	0	0
1700	0.0050278	0	0
1701	0.00506789	0	0
1702	0.00510272	0	0
1703	0.00513227	0	0
1704	0.00515656	0	0
1705	0.00517556	0	0
1706	0.00518919	0	0
1707	0.00519733	0	0
1708	0.00519977	0	0
1709	0.00519632	0	0
1710	0.00518682	0	0
1711	0.00517122	0	0
1712	0.00514964	0	0
1713	0.00512237	0	0
1714	0.0050899	0	0
1715	0.00505282	0	0
1716	0.00501181	0	0
1717	0.00496749	0	0
1718	0.00492044	0	0
1719	0.00487103	0	0
1720	0.00481937	0	0
1721	0.00476523	0	0
1722	0.00470794	1.17883e-06	0
1723	0.00464525	3.96437e-05	0
1724	0.00457743	7.73747e-05	0
1725	0.00450356	0.00011421	0
1726	0.00442322	0.000150257	0
1727	0.00433672	0.000185818	0
1728	0.00424513	0.000221183	0
1729	0.00415018	0.000256413	0
1730	0.00405394	0.000291252	0
1731	0.0039578	0.000324686	8.37947e-07
1732	0.00384553	0.000343497	2.41918e-05
1733	0.00373693	0.000359955	4.76439e-05
1734	0.00363303	0.000373752	7.06176e-05
1735	0.00353434	0.000384727	9.25546e-05
1736	0.00344089	0.000392813	0.000113156
1737	0.00335236	0.00039797	0.000132495
1738	0.00326829	0.000400143	0.000150914
1739	0.0031882	0.000399275	0.000168794
1740	0.0031117	0.000395361	0.000186397
1741	0.00303844	0.00038851	0.000203841
1742	0.00296812	0.000378972	0.000221164
1743	0.00290042	0.000367109	0.000238394
1744	0.00283502	0.000353332	0.00025556
1745	0.00277163	0.000338038	0.000272666
1746	0.00271003	0.000321568	0.000289626
1747	0.00265009	0.000304208	0.000306205
1748	0.00259181	0.000286205	0.000322
1749	0.00253529	0.000267787	0.000336489
1750	0.00248068	0.000249168	0.000349132
1751	0.00242806	0.00023053	0.000359521
1752	0.00237745	0.000211992	0.000367487
1753	0.00232872	0.000193593	0.000373149
1754	0.00228165	0.00017529	0.000376861
1755	0.002236	0.000156982	0.000379104
1756	0.0021916	0.000138542	0.000380357
1757	0.0021484	0.000119854	0.000381008
1758	0.00210645	0.00010084	0.000381314
1759	0.00206589	8.14725e-05	0.000381411
1760	0.00202693	6.17848e-05	0.000381345
1761	0.00198971	4.18689e-05	0.000381117
1762	0.00195438	2.18658e-05	0.000380717
1763	0.00192099	1.94708e-06	0.000380152
1764	0.00188916	0	0.000379166
1765	0.00185917	0	0.000378109
1766	0.00183096	0	0.000377138
1767	0.00180436	0	0.000376405
1768	0.00177919	0	0.000376074
1769	0.00175525	0	0.000376301
1770	0.00173233	0	0.000377217
1771	0.00171021	0	0.000378914
1772	0.00168866	0	0.000381442
1773	0.00166751	0	0.000384813
1774	0.00164656	0	0.000389013
1775	0.00162571	0	0.000394018
1776	0.00160487	0	0.000399811
1777	0.00158401	0	0.000406388
1778	0.00156305	0	0.000413742
1779	0.00154178	0	0.000421806
1780	0.00151979	0	0.000430409
1781	0.00149653	0	0.000439249
1782	0.0014716	0	0.000447939
1783	0.00144496	0	0.000456086
1784	0.00141703	0	0.000463372
1785	0.00138849	0	0.000469585
1786	0.00135998	0	0.000474621
1787	0.00133192	0	0.000478482
1788	0.00130448	0	0.000481293
1789	0.00127772	0	0.000483321
1790	0.00125167	0	0.000484943
1791	0.00122634	0	0.000486543
1792	0.00120171	0	0.00048835
1793	0.0011776	0	0.000490297
1794	0.00115375	0	0.000491998
1795	0.00112984	0	0.00049289
1796	0.00110565	0	0.000492504
1797	0.00108115	0	0.000490705
1798	0.00105654	0	0.000487771
1799	0.00103215	0	0.000484272
1800	0.00100835	0	0.000480823
1801	0.00098544	0	0.000477864
1802	0.000963596	0	0.000475571
1803	0.000942922	0	0.000473881
1804	0.000923475	0	0.000472589
1805	0.000905273	0	0.00047144
1806	0.00088829	0	0.000470183
1807	0.000872424	0	0.000468602
1808	0.000857486	0	0.000466543
1809	0.000843205	0	0.000463965
1810	0.000829268	0	0.000460982
1811	0.000815368	0	0.000457892
1812	0.000801283	0	0.000455115
1813	0.000786971	0	0.000453042
1814	0.000772668	0	0.000451807
1815	0.000758917	0	0.000451134
1816	0.000746444	0	0.000450403
1817	0.000735895	0	0.000448959
1818	0.000727541	0	0.000446511
1819	0.000721146	0	0.000443343
1820	0.000716097	0	0.000440188
1821	0.000711709	0	0.000437863
1822	0.000707505	0	0.000436903
1823	0.00070334	0	0.000437421
1824	0.000699347	0	0.000439181
1825	0.000695793	0	0.000441791
1826	0.000692951	0	0.000444876
1827	0.000691023	0	0.000448177
1828	0.000690107	0	0.000451576
1829	0.000690192	0	0.000455083
1830	0.000691159	0	0.000458813
1831	0.000692798	0	0.000462946
1832	0.000694815	0	0.000467689
1833	0.000696889	0	0.000473202
1834	0.000698747	0	0.000479468
1835	0.000700267	0	0.000486165
1836	0.000701504	0	0.000492653
1837	0.000702574	0	0.000498194
1838	0.000703469	0	0.000502305
1839	0.000703938	0	0.000504981
1840	0.000703573	0	0.000506589
1841	0.000702035	0	0.000507528
1842	0.000699227	0	0.000507939
1843	0.000695321	0	0.000507656
1844	0.000690644	0	0.000506335
1845	0.000685546	0	0.000503642
1846	0.000680293	0	0.00049937
1847	0.000675007	0	0.000493498
1848	0.000669666	0	0.000486197
1849	0.000664122	0	0.000477791
1850	0.000658153	0	0.000468702
1851	0.000651525	0	0.000459382
1852	0.000644042	0	0.000450251
1853	0.000635581	0	0.00044166
1854	0.000626112	0	0.000433868
1855	0.000615688	0	0.000427034
1856	0.000604438	0	0.000421222
1857	0.000592545	0	0.000416412
1858	0.000580231	0	0.000412508
1859	0.000567739	0	0.000409357
1860	0.000555323	0	0.000406773
1861	0.000543246	0	0.000404555
1862	0.000531774	0	0.000402511
1863	0.000521169	0	0.000400473
1864	0.000511654	0	0.000398296
1865	0.000503343	0	0.000395835
1866	0.000496164	0	0.000392926
1867	0.000489808	0	0.000389379
1868	0.000483792	0	0.000385006
1869	0.000477621	0	0.000379695
1870	0.000470994	0	0.000373489
1871	0.000463908	0	0.000366611
1872	0.000456608	0	0.000359433
1873	0.000449421	0	0.000352374
1874	0.000442591	0	0.000345798
1875	0.00043621	0	0.000339953
1876	0.000430246	0	0.000334954
1877	0.000424611	0	0.000330808
1878	0.000419221	0	0.000327457
1879	0.00041401	0	0.000324808
1880	0.00040893	0	0.000322765
1881	0.00040393	0	0.000321241
1882	0.000398954	0	0.000320165
1883	0.000393932	0	0.000319482
1884	0.000388792	0	0.000319156
1885	0.000383463	0	0.000319168
1886	0.000377889	0	0.000319518
1887	0.000372035	0	0.000320221
1888	0.000365899	0	0.000321297
1889	0.000359514	0	0.000322749
1890	0.000352959	0	0.00032453
1891	0.000346362	0	0.000326507
1892	0.000339887	0	0.000328456
1893	0.000333709	0	0.000330095
1894	0.000327967	0	0.000331162
1895	0.000322723	0	0.000331491
1896	0.000317946	0	0.000331062
1897	0.000313529	0	0.000329975
1898	0.00030932	0	0.00032839
1899	0.000305174	0	0.000326458
1900	0.000300978	0	0.000324278
1901	0.000296663	0	0.000321897
1902	0.000292207	0	0.000319325
1903	0.000287622	0	0.000316558
1904	0.000282954	0	0.000313583
1905	0.000278275	0	0.00031039
1906	0.000273671	0	0.00030697
1907	0.00026924	0	0.000303321
1908	0.000265079	0	0.000299453
1909	0.000261274	0	0.000295399
1910	0.0002579	0	0.000291221
1911	0.000255008	0	0.000287019
1912	0.000252628	0	0.000282922
1913	0.000250754	0	0.000279076
1914	0.000249332	0	0.000275626
1915	0.000248233	0	0.000272709
1916	0.000247229	0	0.000270464
1917	0.000245997	0	0.000269055
1918	0.000244198	0	0.000268617
1919	0.000241681	0	0.000269055
1920	0.00023869	0	0.000269822
1921	0.00023585	0	0.000269939
1922	0.000233812	0	0.000268449
1923	0.000232799	0	0.000264994
1924	0.000232487	0	0.000259966
1925	0.000232323	0	0.000254121
1926	0.000231917	0	0.000248087
1927	0.000231166	0	0.000242198
1928	0.000230131	0	0.000236614
1929	0.000228888	0	0.000231455
1930	0.000227477	0	0.000226809
1931	0.000225917	0	0.00022269
1932	0.000224223	0	0.000219034
1933	0.000222401	0	0.000215744
1934	0.000220449	0	0.000212741
1935	0.00021835	0	0.000209986
1936	0.000216095	0	0.000207473
1937	0.000213687	0	0.000205215
1938	0.000211157	0	0.00020322
1939	0.000208554	0	0.000201499
1940	0.000205933	0	0.00020007
1941	0.000203329	0	0.00019901
1942	0.000200734	0	0.000198495
1943	0.000198115	0	0.000198758
1944	0.000195531	0	0.000199873
1945	0.000193262	0	0.000201486
1946	0.000191748	0	0.000202882
1947	0.000191276	0	0.000203519
1948	0.000191689	0	0.000203497
1949	0.00019245	0	0.000203363
1950	0.000192984	0	0.000203489
1951	0.000192917	0	0.000203743
1952	0.000192078	0	0.000203709
1953	0.000190404	0	0.000203084
1954	0.000187888	0	0.000201857
1955	0.000184582	0	0.00020025
1956	0.000180604	0	0.000198569
1957	0.000176121	0	0.000197072
1958	0.000171323	0	0.00019591
1959	0.000166398	0	0.000195131
1960	0.000161514	0	0.000194717
1961	0.000156805	0	0.000194615
1962	0.000152368	0	0.000194757
1963	0.000148267	0	0.000195063
1964	0.000144547	0	0.00019543
1965	0.000141236	0	0.000195737
1966	0.00013835	0	0.000195865
1967	0.000135885	0	0.00019573
1968	0.000133804	0	0.000195317
1969	0.000132043	0	0.000194689
1970	0.000130518	0	0.000193966
1971	0.000129145	0	0.000193291
1972	0.000127862	0	0.000192777
1973	0.000126636	0	0.000192485
1974	0.00012546	0	0.000192425
1975	0.000124332	0	0.000192585
1976	0.000123223	0	0.000192979
1977	0.000122042	0	0.000193697
1978	0.000120625	0	0.000194922
1979	0.000118785	0	0.000196871
1980	0.000116435	0	0.000199629
1981	0.000113718	1.17057e-06	0.000202919
1982	0.000111062	5.76511e-06	0.000206038
1983	0.000109213	7.5141e-06	0.00020822
1984	0.00010863	5.31157e-06	0.000208813
1985	0.000109316	0	0.000207638
1986	0.000110739	0	0.000204861
1987	0.000112527	0	0.000201069
1988	0.000114299	0	0.000196696
1989	0.000115855	0	0.000192035
1990	0.000117125	0	0.000187297
1991	0.000118096	0	0.000182653
1992	0.000118785	0	0.00017823
1993	0.000119223	0	0.000174088
1994	0.000119449	0	0.000170235
1995	0.000119485	0	0.000166673
1996	0.000119301	0	0.000163462
1997	0.000118798	0	0.000160744
[truncated: 2,003 more rows]
[truncated: 70 more columns]

## Sheet: 4 Sources
Reconstructed Source Distributions							Compare Input & Reconstructed Sink Samples					Sink Sample Weights
Age (Ma)	Source 1	Source 2	Source 3	Source 4				Mean		St. Dev.			Princeton, Bluestone, Hinton	Surprise Canyon3- 06GC149, Surprise_Cyn2, SurpriseC_Cngl	24PL09, 10JM94, 40JM94, 05PL15, 09LB04	Mauch_Chunk	KY-21-SG	Tonka	Stanley, Hot_spring	BC05	09-CM-699	MS11, MS10	MS01, MSGE313	BC01, BC02, CC01	ML01, MP-DZ1	1QZ19	SY-D, Watahomigi, Manakacha1	Tumbling Run, Pottsville Fm, OH-1-SS	Pocohontas, Lee, VA-1-GN	Racoon, Montevallo, Sewanee	KY-18-CB	OH-4-SN	BCRA-01-10	MB1-3, MB2-4, MB2-2, MB2-3, MB2-5, MB2-1, MB1-2, MB1-1	a16, a23, a29, a38, a48, a49, a50	46-1, 46-2	IB_AD, IB_M1, IB_M2	FCB_AD	FCB_A2	FCB_A1	S3	GS01, GS09	MS04, MS05, MS06	MC05, MC17	GS11, GS24	MC20	EC01, RC01, RC19	V01, V10, V18, V20	V22, 25
0	7.81712e-13	9.16211e-13	0	0			Cross-correlation	0.725587	±	0.18009		Weights Source 1	0	0.000760135	0.000609679	0.0065904	0.00167255	0	0.0777839	0.0067072	0.0241237	0	0	0.0397758	0.00901301	0.000774165	0.00107065	0.0125542	0	0	0	0	0.00724874	0	0	0	0.00320954	0.00672176	0.00271545	0	0.0386446	0	0	0.0107109	0	0.0102539	0.0127308	0.000967142	0
1	8.01401e-13	9.40929e-13	0	0			Likeness	0.744911	±	0.0969196		Weights Source 2	0.957193	0.735616	0	0.924835	0.819845	0	0.869484	0.128016	0.905358	0.512763	0.244563	0.0339385	0.932731	0.469031	0.4752	0.962561	0.921317	0.925692	0.810026	0.969854	0.94914	0.839584	0.810913	0.853916	0.835779	0.871176	0.81464	0.932339	0.824418	0.262316	0.964268	0.271773	0	0.407735	0.101012	0	0
2	8.21567e-13	9.66302e-13	0	0			Kuiper V Value	0.165644	±	0.106358		Weights Source 3	0.0428075	0.0903461	0	0.068575	0.048539	0	0.0266525	0.267876	0.0705183	0.298983	0.207964	0.219321	0.0582561	0.071118	0.0405067	0.0248851	0.0786833	0.0212465	0.0257574	0.0301465	0.0252483	0.0312597	0.04761	0.0441454	0.0169048	0.0930305	0.0579285	0.0258271	0.025235	0.231023	0.0357321	0.197963	0.481873	0.246036	0.124388	0.0404846	0.0463891
3	8.42222e-13	9.92347e-13	0	0			KS D Value	0.131564	±	0.0980204		Weights Source 4	0	0.173277	0.99939	0	0.129944	1	0.02608	0.597401	0	0.188254	0.547474	0.706965	0	0.459076	0.483223	0	0	0.0530613	0.164217	0	0.0183628	0.129156	0.141477	0.101938	0.144107	0.0290722	0.124716	0.0418339	0.111703	0.506661	0	0.519553	0.518127	0.335975	0.761869	0.958548	0.953611
4	8.63378e-13	1.01908e-12	0	0
5	8.85044e-13	1.04653e-12	0	0			Number of sink samples	108				Cross-correlation	0.902406	0.930246	0.271833	0.827637	0.932883	0.226277	0.770614	0.51988	0.708879	0.813367	0.692735	0.736092	0.830868	0.598514	0.82137	0.650893	0.802535	0.75603	0.831077	0.881514	0.85141	0.832127	0.839632	0.833851	0.908734	0.90348	0.913789	0.786146	0.878885	0.880822	0.498355	0.867085	0.838786	0.719846	0.716245	0.755469	0.643026
6	9.07235e-13	1.07469e-12	0	0			Mean Cross-correlation of sink samples	0.318				Likeness	0.811914	0.87019	0.518372	0.768359	0.863656	0.470689	0.748162	0.575131	0.754181	0.712453	0.657644	0.649439	0.816019	0.756622	0.816271	0.744325	0.733139	0.69764	0.785444	0.812559	0.7834	0.789147	0.846558	0.808176	0.870174	0.839761	0.864055	0.715547	0.825567	0.762836	0.373886	0.761317	0.695015	0.729095	0.67445	0.615588	0.466761
7	9.29961e-13	1.10361e-12	0	0			Range Cross-correlation of sink samples	0.962				Kuiper V Value	0.14952	0.0740813	0.458847	0.153926	0.0720068	0.490064	0.130904	0.216747	0.0963794	0.246911	0.24587	0.252653	0.0912464	0.175729	0.119469	0.127194	0.234894	0.151366	0.0922958	0.114594	0.0889637	0.145718	0.103413	0.142469	0.0630694	0.0743985	0.059983	0.173387	0.115571	0.198023	0.590319	0.166437	0.220174	0.166203	0.236676	0.337373	0.506134
8	9.53234e-13	1.13328e-12	0	0			Mean Kuiper V value of sink samples	0.409				KS D Value	0.109167	0.0452478	0.453563	0.106776	0.0652132	0.465582	0.0743201	0.134068	0.0821744	0.177364	0.195936	0.240489	0.0854921	0.115013	0.0815026	0.111758	0.142934	0.123752	0.0706512	0.0932658	0.0477236	0.14371	0.100591	0.128657	0.0347827	0.0592633	0.0358071	0.169693	0.0643465	0.131611	0.32226	0.109256	0.21717	0.087701	0.23154	0.26641	0.335461
9	9.77068e-13	1.16374e-12	0	0			Range Kuiper V value of sink samples	0.952
10	1.00148e-12	1.19501e-12	0	0			Final Residual	0.217633
11	1.02647e-12	1.2271e-12	0	0			Number of Iterations	160
12	1.05206e-12	1.26003e-12	0	0
13	1.07827e-12	1.29383e-12	0	0
14	1.1051e-12	1.32852e-12	0	0
15	1.13258e-12	1.36412e-12	0	0
16	1.16071e-12	1.40066e-12	0	0
17	1.18951e-12	1.43816e-12	0	0
18	1.219e-12	1.47664e-12	0	0
19	1.2492e-12	1.51613e-12	0	0
20	1.28011e-12	1.55666e-12	0	0
21	1.31175e-12	1.59825e-12	0	0
22	1.34415e-12	1.64092e-12	0	0
23	1.37731e-12	1.68471e-12	0	0
24	1.41126e-12	1.72965e-12	0	0
25	1.44601e-12	1.77576e-12	0	0
26	1.48159e-12	1.82308e-12	0	0
27	1.518e-12	1.87163e-12	0	0
28	1.55527e-12	1.92144e-12	0	0
29	1.59342e-12	1.97256e-12	0	0
30	1.63247e-12	2.025e-12	0	0
31	1.67243e-12	2.07881e-12	0	0
32	1.71333e-12	2.13402e-12	0	0
33	1.75519e-12	2.19066e-12	0	0
34	1.79803e-12	2.24878e-12	0	0
35	1.84188e-12	2.3084e-12	0	0
36	1.88675e-12	2.36957e-12	0	0
37	1.93266e-12	2.43233e-12	0	0
38	1.97965e-12	2.49671e-12	0	0
39	2.02773e-12	2.56275e-12	0	0
40	2.07693e-12	2.63051e-12	0	0
41	2.12728e-12	2.70002e-12	0	0
42	2.17879e-12	2.77132e-12	0	0
43	2.2315e-12	2.84447e-12	0	0
44	2.28543e-12	2.9195e-12	0	0
45	2.34061e-12	2.99647e-12	0	0
46	2.39707e-12	3.07543e-12	0	0
47	2.45483e-12	3.15641e-12	0	0
48	2.51393e-12	3.23949e-12	0	0
49	2.57439e-12	3.3247e-12	0	0
50	2.63624e-12	3.4121e-12	0	0
51	2.69952e-12	3.50174e-12	0	0
52	2.76425e-12	3.59369e-12	0	0
53	2.83048e-12	3.688e-12	0	0
54	2.89822e-12	3.78473e-12	0	0
55	2.96752e-12	3.88394e-12	0	0
56	3.03841e-12	3.9857e-12	0	0
57	3.11092e-12	4.09006e-12	0	0
58	3.18509e-12	4.19709e-12	0	0
59	3.26097e-12	4.30686e-12	0	0
60	3.33857e-12	4.41944e-12	0	0
61	3.41795e-12	4.53489e-12	0	0
62	3.49915e-12	4.6533e-12	0	0
63	3.5822e-12	4.77473e-12	0	0
64	3.66714e-12	4.89926e-12	0	0
65	3.75402e-12	5.02697e-12	0	0
66	3.84288e-12	5.15793e-12	0	0
67	3.93377e-12	5.29223e-12	0	0
68	4.02673e-12	5.42996e-12	0	0
69	4.12181e-12	5.5712e-12	0	0
70	4.21905e-12	5.71603e-12	0	0
71	4.3185e-12	5.86455e-12	0	0
72	4.42022e-12	6.01685e-12	0	0
73	4.52425e-12	6.17302e-12	0	0
74	4.63065e-12	6.33317e-12	0	0
75	4.73947e-12	6.49739e-12	0	0
76	4.85077e-12	6.66579e-12	0	0
77	4.9646e-12	6.83846e-12	0	0
78	5.08102e-12	7.01552e-12	0	0
79	5.2001e-12	7.19709e-12	0	0
80	5.32189e-12	7.38326e-12	0	0
81	5.44645e-12	7.57417e-12	0	0
82	5.57386e-12	7.76992e-12	0	0
83	5.70417e-12	7.97065e-12	0	0
84	5.83747e-12	8.17647e-12	0	0
85	5.9738e-12	8.38752e-12	0	0
86	6.11326e-12	8.60394e-12	0	0
87	6.25591e-12	8.82585e-12	0	0
88	6.40183e-12	9.0534e-12	0	0
89	6.5511e-12	9.28673e-12	0	0
90	6.7038e-12	9.52599e-12	0	0
91	6.86001e-12	9.77133e-12	0	0
92	7.01983e-12	1.00229e-11	0	0
93	7.18334e-12	1.02809e-11	0	0
94	7.35063e-12	1.05454e-11	0	0
95	7.5218e-12	1.08167e-11	0	0
96	7.69694e-12	1.10949e-11	0	0
97	7.87616e-12	1.13802e-11	0	0
98	8.05957e-12	1.16728e-11	0	0
99	8.24726e-12	1.19728e-11	0	0
100	8.43936e-12	1.22804e-11	0	0
101	8.63597e-12	1.2596e-11	0	0
102	8.83722e-12	1.29196e-11	0	0
103	9.04324e-12	1.32515e-11	0	0
104	9.25415e-12	1.35919e-11	0	0
105	9.47008e-12	1.3941e-11	0	0
106	9.69117e-12	1.4299e-11	0	0
107	9.91757e-12	1.46663e-11	0	0
108	1.01494e-11	1.5043e-11	0	0
109	1.03869e-11	1.54294e-11	0	0
110	1.06301e-11	1.58258e-11	0	0
111	1.08793e-11	1.62324e-11	0	0
112	1.11346e-11	1.66495e-11	0	0
113	1.13962e-11	1.70775e-11	0	0
114	1.16642e-11	1.75165e-11	0	0
115	1.19389e-11	1.79669e-11	0	0
116	1.22206e-11	1.84291e-11	0	0
117	1.25093e-11	1.89033e-11	0	0
118	1.28053e-11	1.93899e-11	0	0
119	1.31089e-11	1.98892e-11	0	0
120	1.34202e-11	2.04016e-11	0	0
121	1.37396e-11	2.09275e-11	0	0
122	1.40674e-11	2.14672e-11	0	0
123	1.44038e-11	2.20213e-11	0	0
124	1.47525e-11	2.25959e-11	0	0
125	1.52903e-11	2.34961e-11	0	0
126	2.21063e-11	3.44965e-11	0	5.14345e-12
127	1.72626e-10	2.60415e-10	0	2.4083e-10
128	2.561e-09	3.84432e-09	0	3.98956e-09
129	2.73044e-08	4.0973e-08	0	4.28317e-08
130	1.93023e-07	2.89641e-07	0	3.02978e-07
131	9.00363e-07	1.35104e-06	0	1.41337e-06
132	2.77004e-06	4.15657e-06	0	4.34842e-06
133	5.62071e-06	8.43413e-06	0	8.82345e-06
134	7.52204e-06	1.12872e-05	0	1.18082e-05
135	6.6395e-06	9.96287e-06	0	1.04228e-05
136	3.86629e-06	5.80155e-06	0	6.06934e-06
137	1.48816e-06	2.23306e-06	0	2.33612e-06
138	3.86426e-07	5.79849e-07	0	6.06596e-07
139	8.682e-08	1.30276e-07	0	1.36277e-07
140	5.75622e-08	8.63713e-08	0	9.03571e-08
141	1.0059e-07	1.50934e-07	0	1.57916e-07
142	1.8583e-07	2.78837e-07	0	2.91747e-07
143	3.24053e-07	4.86243e-07	0	5.08759e-07
144	5.30929e-07	7.96664e-07	0	8.33555e-07
145	8.17185e-07	1.22619e-06	0	1.28297e-06
146	1.18158e-06	1.77297e-06	0	1.85508e-06
147	1.60496e-06	2.40825e-06	0	2.5198e-06
148	2.04796e-06	3.07298e-06	0	3.21535e-06
149	2.45491e-06	3.6836e-06	0	3.85436e-06
150	2.76443e-06	4.14802e-06	0	4.34049e-06
151	2.92437e-06	4.38797e-06	0	4.59188e-06
152	2.90614e-06	4.36054e-06	0	4.56364e-06
153	2.71303e-06	4.07069e-06	0	4.26102e-06
154	2.37928e-06	3.56978e-06	0	3.73778e-06
155	1.96014e-06	2.9407e-06	0	3.08069e-06
156	1.51697e-06	2.27552e-06	0	2.38612e-06
157	1.1028e-06	1.65381e-06	0	1.73741e-06
158	7.53053e-07	1.1287e-06	0	1.19023e-06
159	4.82945e-07	7.23019e-07	0	7.68566e-07
160	2.9078e-07	4.34192e-07	0	4.69888e-07
161	1.64231e-07	2.43696e-07	0	2.75027e-07
162	8.68345e-08	1.26774e-07	0	1.58449e-07
163	4.28118e-08	5.96421e-08	0	9.60401e-08
164	1.96898e-08	2.33216e-08	0	6.97684e-08
165	9.13868e-09	4.6919e-09	0	7.02277e-08
166	4.45376e-09	0	0	9.55221e-08
167	8.49764e-09	0	0	1.66063e-07
168	2.70621e-08	0	0	3.2016e-07
169	6.30072e-08	8.81854e-09	0	6.09309e-07
170	1.24396e-07	3.29087e-08	0	1.10681e-06
171	2.22776e-07	7.36101e-08	0	1.89113e-06
172	3.6355e-07	1.3328e-07	0	3.0046e-06
173	5.42039e-07	2.09554e-07	0	4.41256e-06
174	7.39345e-07	2.9338e-07	0	5.97198e-06
175	9.23171e-07	3.69394e-07	0	7.4378e-06
176	1.05541e-06	4.19491e-07	0	8.52066e-06
177	1.10458e-06	4.28682e-07	0	8.98185e-06
178	1.05776e-06	3.90703e-07	0	8.72392e-06
179	9.25825e-07	3.10499e-07	0	7.83095e-06
180	7.39446e-07	2.02326e-07	0	6.53767e-06
181	5.38183e-07	8.46347e-08	0	5.14654e-06
182	3.43869e-07	0	0	3.91906e-06
183	1.61158e-07	0	0	3.0352e-06
184	6.37624e-08	0	0	2.71145e-06
185	6.64788e-08	0	0	3.0411e-06
186	1.75919e-07	0	0	4.06593e-06
187	3.83362e-07	0	0	5.73144e-06
188	6.53797e-07	0	0	7.81827e-06
189	9.22017e-07	0	0	9.91774e-06
190	1.09893e-06	1.2005e-08	0	1.15061e-05
191	1.13717e-06	0	0	1.21807e-05
192	9.90425e-07	0	0	1.1754e-05
193	6.96669e-07	0	0	1.04255e-05
194	3.2664e-07	0	0	8.63421e-06
195	0	0	0	6.86136e-06
196	0	0	0	5.44255e-06
197	0	0	0	4.51568e-06
198	0	0	0	4.03582e-06
199	0	0	0	3.87544e-06
200	0	0	0	3.90299e-06
201	0	0	0	4.02152e-06
202	0	0	0	4.17335e-06
203	0	0	0	4.32919e-06
204	0	0	0	4.47572e-06
205	0	0	0	4.60713e-06
206	0	0	0	4.72076e-06
207	0	0	0	4.81536e-06
208	0	0	0	4.89059e-06
209	0	0	0	4.94697e-06
210	0	0	0	4.98597e-06
211	0	0	0	5.0102e-06
212	0	0	0	5.02354e-06
213	0	0	0	5.03121e-06
214	0	0	0	5.03977e-06
215	0	0	0	5.0569e-06
216	0	0	0	5.09104e-06
217	0	0	0	5.15076e-06
218	0	0	0	5.24391e-06
219	0	0	0	5.37657e-06
220	7.03472e-08	0	0	5.55005e-06
221	3.84084e-07	0	0	5.75887e-06
222	6.28402e-07	1.67888e-07	0	5.86486e-06
223	8.07964e-07	4.7995e-07	0	5.87705e-06
224	9.91811e-07	7.9882e-07	0	5.89329e-06
225	1.17193e-06	1.11191e-06	0	5.90454e-06
226	1.33945e-06	1.40532e-06	0	5.90036e-06
227	1.48535e-06	1.66496e-06	0	5.87019e-06
228	1.60136e-06	1.87779e-06	0	5.80471e-06
229	1.68081e-06	2.03315e-06	0	5.69732e-06
230	1.71934e-06	2.12376e-06	0	5.54543e-06
231	1.71538e-06	2.14644e-06	0	5.35141e-06
232	1.67037e-06	2.10229e-06	0	5.12309e-06
233	1.58855e-06	1.99643e-06	0	4.87372e-06
234	1.47655e-06	1.83716e-06	0	4.6214e-06
235	1.34265e-06	1.63488e-06	0	4.3881e-06
236	1.19607e-06	1.4008e-06	0	4.19835e-06
237	1.04627e-06	1.14579e-06	0	4.07771e-06
238	9.02484e-07	8.79419e-07	0	4.0511e-06
239	7.74108e-07	6.0986e-07	0	4.14097e-06
240	6.72965e-07	3.45356e-07	0	4.36459e-06
241	6.21261e-07	9.99891e-08	0	4.72881e-06
242	6.20069e-07	0	0	5.14357e-06
243	8.93174e-07	0	0	5.66009e-06
244	1.83404e-06	2.10436e-07	0	6.20972e-06
245	3.91023e-06	1.38577e-06	0	6.21394e-06
246	8.24701e-06	4.14378e-06	0	5.23592e-06
247	1.58715e-05	9.31475e-06	2.23657e-06	2.20585e-06
248	2.76117e-05	1.67997e-05	5.32174e-06	0
249	4.29609e-05	2.60016e-05	7.97788e-06	0
250	5.92549e-05	3.57542e-05	1.0741e-05	0
251	7.21512e-05	4.34139e-05	1.28415e-05	0
252	7.75126e-05	4.64665e-05	1.35479e-05	0
253	7.37053e-05	4.39261e-05	1.2572e-05	0
254	6.25955e-05	3.69429e-05	1.02449e-05	0
255	4.84199e-05	2.81144e-05	7.32e-06	0
256	3.54387e-05	1.95471e-05	3.43628e-06	2.45326e-06
257	2.59671e-05	1.24644e-05	0	8.3303e-06
258	2.04093e-05	8.4689e-06	0	1.12356e-05
259	1.81599e-05	7.00139e-06	0	1.2306e-05
260	1.78857e-05	7.12855e-06	0	1.22402e-05
261	1.85319e-05	8.11278e-06	0	1.16103e-05
262	1.94718e-05	9.52021e-06	0	1.07842e-05
263	2.04135e-05	1.11544e-05	0	9.97072e-06
264	2.12646e-05	1.29601e-05	0	9.28322e-06
265	2.20382e-05	1.49554e-05	0	8.7811e-06
266	2.28069e-05	1.71965e-05	0	8.48594e-06
267	2.36303e-05	1.97453e-05	5.39686e-07	8.28232e-06
268	2.46027e-05	2.26811e-05	2.31918e-06	7.97602e-06
269	2.60688e-05	2.61679e-05	4.32845e-06	7.62381e-06
270	2.82949e-05	3.03357e-05	6.61699e-06	7.04221e-06
271	3.15057e-05	3.52603e-05	9.22018e-06	6.05026e-06
272	3.57359e-05	4.08603e-05	1.20924e-05	4.57554e-06
273	4.06598e-05	4.6783e-05	1.5026e-05	2.78224e-06
274	4.55116e-05	5.23619e-05	1.76075e-05	1.14747e-06
275	4.92134e-05	5.67267e-05	1.92712e-05	4.028e-07
276	5.07301e-05	5.9078e-05	1.94647e-05	1.31345e-06
277	4.95061e-05	5.90166e-05	1.7869e-05	4.36961e-06
278	4.57374e-05	5.67438e-05	1.45593e-05	9.54073e-06
279	4.03004e-05	5.30001e-05	1.00158e-05	1.62276e-05
280	3.43718e-05	4.8767e-05	4.97057e-06	2.34401e-05
281	2.89668e-05	4.49018e-05	1.74908e-07	3.01095e-05
282	2.42311e-05	4.17642e-05	0	3.4704e-05
283	2.0815e-05	3.9648e-05	0	3.76499e-05
284	1.86185e-05	3.84589e-05	0	3.90048e-05
285	1.74842e-05	3.80571e-05	0	3.91325e-05
286	1.73487e-05	3.83905e-05	0	3.86021e-05
287	1.82459e-05	3.95142e-05	0	3.80299e-05
288	2.02388e-05	4.15317e-05	0	3.79345e-05
289	2.3349e-05	4.45087e-05	0	3.8638e-05
290	2.75177e-05	4.84083e-05	0	4.02351e-05
291	3.25959e-05	5.30724e-05	0	4.26345e-05
292	3.83582e-05	5.8255e-05	0	4.56447e-05
293	4.45477e-05	6.36953e-05	0	4.90526e-05
294	5.09818e-05	6.92245e-05	0	5.26461e-05
295	5.77296e-05	7.48986e-05	0	5.61643e-05
296	6.52988e-05	8.11201e-05	0	5.92187e-05
297	7.46271e-05	8.86134e-05	0	6.12926e-05
298	8.66512e-05	9.81019e-05	0	6.19218e-05
299	0.00010162	0.000109811	0	6.09913e-05
300	0.000118675	0.000123189	0	5.89266e-05
301	0.000135524	0.00013668	0	5.67813e-05
302	0.000147957	0.000147341	0	5.62787e-05
303	0.000151497	0.000152066	0	5.90407e-05
304	0.000145716	0.00015084	0	6.49426e-05
305	0.000135068	0.000147318	0	7.18685e-05
306	0.000124369	0.000145296	0	7.75233e-05
307	0.000115733	0.000146286	0	8.07759e-05
308	0.000109646	0.000150246	0	8.14431e-05
309	0.000106995	0.000157106	0	7.95856e-05
310	0.000107938	0.000166007	0	7.58044e-05
311	0.00010772	0.000172327	0	7.25817e-05
312	0.00010214	0.000172179	0	7.22201e-05
313	9.68496e-05	0.000169752	0	7.3431e-05
314	9.85878e-05	0.000170613	0	7.42908e-05
315	0.000106739	0.000175087	0	7.51364e-05
316	0.000118015	0.000181597	0	7.6944e-05
317	0.00013022	0.000189225	0	8.01718e-05
318	0.000142438	0.000197483	0	8.49753e-05
319	0.000155047	0.00020611	0	9.14098e-05
320	0.000169065	0.000214965	0	9.94134e-05
321	0.000183894	0.000223435	0	0.000108777
322	0.000194925	0.000229688	6.5894e-06	0.000117953
323	0.000197869	0.000232107	1.76906e-05	0.000126733
324	0.000193654	0.000231056	2.64098e-05	0.000135395
325	0.000188187	0.000229021	3.33491e-05	0.000142528
326	0.000188275	0.000229455	3.86196e-05	0.000146808
327	0.000196903	0.000235063	4.05628e-05	0.000147637
328	0.000212826	0.000246787	3.67601e-05	0.000145338
329	0.000232472	0.000263011	2.65031e-05	0.000141057
330	0.000251685	0.000279679	1.21323e-05	0.00013638
331	0.000266946	0.000292286	0	0.000132238
332	0.000275891	0.000298181	0	0.000128049
333	0.000279456	0.000297686	0	0.000126266
334	0.000277894	0.000291904	0	0.00012649
335	0.000273208	0.000283086	0	0.000127662
336	0.00026899	0.000274389	0	0.000128335
337	0.000267903	0.000268219	0	0.000127733
338	0.000269369	0.000264787	0	0.000126731
339	0.000269791	0.000262907	0	0.000127832
340	0.000264917	0.00026264	0	0.000134156
341	0.000252765	0.000266321	0	0.000147633
342	0.000236635	0.000274607	0	0.000166013
343	0.000225935	0.000282197	0	0.000181178
344	0.000229456	0.000282744	0	0.000184367
345	0.000245664	0.000277455	0	0.000174685
346	0.000264118	0.000271696	0	0.000158758
347	0.0002765	0.000265905	0	0.00014255
348	0.000282758	0.000257738	0	0.000126966
349	0.000287895	0.000249242	0	0.000109869
350	0.000295105	0.000245168	0	8.99113e-05
351	0.000302365	0.000246847	0	6.84434e-05
352	0.000305407	0.000251691	0	4.83722e-05
353	0.000302611	0.000257028	0	3.18659e-05
354	0.000296053	0.000262208	7.16698e-07	1.92246e-05
355	0.000289044	0.00026799	3.20842e-06	9.42861e-06
356	0.000284101	0.000275503	5.43713e-06	1.58287e-06
357	0.000281702	0.000284275	5.8995e-06	0
358	0.000281212	0.000295277	7.22111e-06	0
359	0.000281328	0.000308265	1.01906e-05	0
360	0.000280402	0.000322122	1.42452e-05	0
361	0.00027688	0.000335491	1.82362e-05	0
362	0.000269861	0.000347255	2.06995e-05	0
363	0.000259583	0.000356997	2.02631e-05	0
364	0.000247683	0.000365293	1.60104e-05	0
365	0.000236843	0.000373606	7.727e-06	0
366	0.000228437	0.000383019	0	0
367	0.000220059	0.000392958	0	0
368	0.000208133	0.000402698	0	0
369	0.000190717	0.000412063	0	0
370	0.000171687	0.000423163	0	0
371	0.000154633	0.000436614	0	0
372	0.00013725	0.000449008	0	0
373	0.000118447	0.000458758	0	0
374	0.000103711	0.000469728	0	0
375	9.68768e-05	0.000484498	0	0
376	9.47464e-05	0.00049946	0	0
377	9.13625e-05	0.000508158	0	0
378	8.36278e-05	0.000507087	0	1.79029e-06
379	7.34727e-05	0.000498926	0	7.54098e-06
380	6.59748e-05	0.000492144	0	8.41777e-06
381	6.42632e-05	0.000491438	0	2.85356e-06
382	6.76899e-05	0.000495077	0	0
383	7.38085e-05	0.000500825	0	0
384	7.97149e-05	0.00050631	0	0
385	8.35002e-05	0.000509783	0	0
386	8.53154e-05	0.00051219	0	0
387	8.65453e-05	0.000516182	0	0
388	8.82051e-05	0.000524023	0	0
389	9.01594e-05	0.000536754	0	0
390	9.14009e-05	0.000554458	0	0
391	9.06694e-05	0.000575848	0	0
392	8.71145e-05	0.000598078	0	0
393	8.10609e-05	0.00061946	0	0
394	7.44641e-05	0.000642082	0	0
395	7.04541e-05	0.000669734	0	0
396	7.21187e-05	0.000704307	0	0
397	8.1378e-05	0.000744546	0	0
398	9.8748e-05	0.000787121	0	0
399	0.000124032	0.00082921	0	0
400	0.000157034	0.000870334	0	0
401	0.000197422	0.000911358	0	0
402	0.000244007	0.000952671	0	0
403	0.000294379	0.000994562	0	0
404	0.000345384	0.00103834	0	0
405	0.000394164	0.00108529	0	0
406	0.000439148	0.0011349	0	0
407	0.000480402	0.00118581	0	0
408	0.000519199	0.00123845	0	0
409	0.000557219	0.00129453	0	0
410	0.000595999	0.00135338	0	0
411	0.00063674	0.00141137	0	0
412	0.000679747	0.00146515	0	0
413	0.000722999	0.0015137	0	0
414	0.000760947	0.00155627	0	0
415	0.000786033	0.00159036	0	0
416	0.000793576	0.00161388	0	0
417	0.000785562	0.00162788	0	0
418	0.000768418	0.00163553	0	0
419	0.000747514	0.00163934	0	0
420	0.000722299	0.00162974	0	4.48425e-05
421	0.000694259	0.00161178	0	0.000123105
422	0.000666661	0.00159602	0	0.000204956
423	0.000640768	0.00158473	0	0.000286576
424	0.00061411	0.00157571	0	0.000360799
425	0.000580517	0.00156339	0	0.000419276
426	0.000536592	0.00154363	0	0.00045991
427	0.000486625	0.00151657	0	0.000488192
428	0.000438489	0.00148627	0	0.000509451
429	0.000396024	0.00145781	0	0.00052518
430	0.000357379	0.00143305	0	0.000536333
431	0.00031963	0.00141011	0	0.000544769
432	0.000282499	0.00138702	0	0.000551297
433	0.000247809	0.00136385	0	0.000554519
434	0.000217346	0.00134155	0	0.000551785
435	0.00019158	0.00132011	0	0.000540959
436	0.000169282	0.00129826	0	0.000521788
437	0.000148007	0.00127448	0	0.000496092
438	0.000125885	0.00124848	0	0.000466453
439	0.000103945	0.00122177	0	0.000434221
440	8.73032e-05	0.00119714	0	0.000398429
441	8.16901e-05	0.00117663	0	0.000357399
442	8.29949e-05	0.00115598	0	0.000313254
443	8.01743e-05	0.00112878	0	0.000271004
444	7.41285e-05	0.00110008	0	0.000231062
445	7.10004e-05	0.00107849	0	0.000191034
446	7.05088e-05	0.00106497	0	0.000150361
447	7.1432e-05	0.00105699	0	0.000109273
448	7.40591e-05	0.00105238	0	6.81413e-05
449	7.85345e-05	0.00104958	0	2.76849e-05
450	8.36594e-05	0.00104478	0	0
451	8.78277e-05	0.00103399	0	0
452	9.22973e-05	0.00102451	0	0
453	9.71699e-05	0.00101779	0	0
454	0.000102546	0.0010154	0	0
455	0.000107881	0.00101726	0	0
456	0.000112154	0.00102019	0	0
457	0.000115032	0.00101905	0	0
458	0.000117842	0.0010106	0	0
459	0.000123031	0.000996513	0	0
460	0.000131818	0.000981474	0	0
461	0.000141805	0.000967824	0	0
462	0.000148621	0.000953168	0	0
463	0.000151651	0.000933685	0	0
464	0.000155988	0.000908317	0	0
465	0.000167069	0.000879068	0	0
466	0.000185808	0.00084902	0	0
467	0.000209673	0.000821067	0	0
468	0.000235984	0.000797274	0	0
469	0.000263333	0.00077815	0	0
470	0.000291278	0.000762183	0	0
471	0.00031981	0.000746322	0	0
472	0.000349193	0.000727431	0	0
473	0.000379998	0.000704028	0	0
474	0.000412945	0.000677063	0	0
475	0.000448441	0.000649102	0	0
476	0.000486088	0.000622571	0	0
477	0.000524564	0.000598431	0	0
478	0.000562113	0.000576098	0	0
479	0.000597455	0.000554347	0	0
480	0.000630624	0.000532387	0	0
481	0.00066317	0.000510386	0	0
482	0.000697418	0.000489161	0	0
483	0.000735111	0.000469319	0	0
484	0.000776555	0.000450651	4.37171e-08	0
485	0.000820715	0.00043213	4.92182e-06	0
486	0.000868288	0.000413862	1.14238e-05	0
487	0.00092094	0.00039644	1.90955e-05	0
488	0.000980676	0.000380456	2.74996e-05	0
489	0.00104869	0.000365845	3.65342e-05	0
490	0.00112512	0.000352017	4.64558e-05	0
491	0.00120958	0.000338358	5.77107e-05	0
492	0.00130166	0.000324504	7.07656e-05	0
493	0.00140148	0.000310321	8.60007e-05	0
494	0.00151004	0.000295075	0.000102065	3.44581e-06
495	0.00162935	0.000277795	0.000116722	1.53315e-05
496	0.00176219	0.000260287	0.000133492	2.77929e-05
497	0.00191164	0.00024282	0.000152369	4.04712e-05
498	0.00208063	0.000225619	0.000173371	5.29704e-05
499	0.00227161	0.000208776	0.000196582	6.49079e-05
500	0.00248645	0.000192228	0.000222143	7.59606e-05
501	0.00272647	0.000175807	0.000250192	8.59051e-05
502	0.00299257	0.000159331	0.000280794	9.46464e-05
503	0.00328536	0.000142674	0.000313877	0.000102234
504	0.0036053	0.00012577	0.000349201	0.000108856
505	0.00395288	0.000108567	0.000386362	0.000114808
506	0.00432891	9.09789e-05	0.000424817	0.00012044
507	0.00473493	7.28728e-05	0.000463896	0.000126079
508	0.00517361	5.41171e-05	0.000502819	0.000131964
509	0.00564907	3.46619e-05	0.000540698	0.000138179
510	0.00616686	1.45913e-05	0.000576571	0.000144643
511	0.0067304	0	0.000607494	0.000146681
512	0.00734202	0	0.000629574	0.000137284
513	0.00801716	0	0.000646843	0.000127261
514	0.00876274	0	0.000658559	0.000116353
515	0.00958479	0	0.000664007	0.000104293
516	0.0104878	0	0.000662437	9.08745e-05
517	0.0114735	0	0.000653012	7.6011e-05
518	0.0125394	0	0.000634836	5.9771e-05
519	0.013677	0	0.000607097	4.23674e-05
520	0.0148717	0	0.00056933	2.41159e-05
521	0.0161033	0	0.000521651	5.37153e-06
522	0.0173473	0	0.000456331	0
523	0.018584	0	0.000379832	0
524	0.0197977	0	0.000297095	0
525	0.0209769	0	0.000209555	0
526	0.022113	0	0.000118484	0
527	0.0231962	0	2.51566e-05	0
528	0.0241996	0	0	0
529	0.0251127	0	0	0
530	0.0259178	0	0	0
531	0.02659	0	0	0
532	0.0270992	0	0	0
533	0.0274019	0	0	0
534	0.0274333	0	0	0
535	0.0271077	0	0	0
536	0.0263406	0	0	0
537	0.0250979	0	0	0
538	0.023452	0	0	0
539	0.0215887	0	0	0
540	0.0197252	0	0	0
541	0.0179756	3.34703e-05	0	0
542	0.0163857	8.10689e-05	0	0
543	0.0149419	0.000123665	0	0
544	0.013619	0.000161256	0	0
545	0.0124117	0.000193549	0	0
546	0.01132	0.000220407	0	0
547	0.0103367	0.000242162	0	0
548	0.00944852	0.000259602	0	0
549	0.0086423	0.000273823	0	0
550	0.00790798	0.000286035	0	0
551	0.00723849	0.000297323	0	0
552	0.00662825	0.000308392	0	0
553	0.00607202	0.000319439	0	0
554	0.00556466	0.000330186	0	0
555	0.00510072	0.000337614	0	9.96922e-06
556	0.00467651	0.0003434	0	2.09762e-05
557	0.00428883	0.0003477	0	3.16457e-05
558	0.0039355	0.000351007	0	4.16801e-05
559	0.00361528	0.000354458	0	5.05073e-05
560	0.00332687	0.000359217	0	5.76999e-05
561	0.00306753	0.000365468	0	6.36201e-05
562	0.00283267	0.000372047	0	6.95506e-05
563	0.00261779	0.000377495	0	7.66987e-05
564	0.002421	0.000381538	0	8.48425e-05
565	0.00224311	0.000385116	0	9.21607e-05
566	0.00208515	0.000389018	0	9.64476e-05
567	0.00194645	0.000393004	0	9.64144e-05
568	0.00182481	0.000396283	0	9.21455e-05
569	0.00171764	0.00039842	0	8.48313e-05
570	0.00162278	0.000399709	0	7.61597e-05
571	0.00153875	0.000400976	0	6.76326e-05
572	0.00146469	0.000403214	0	6.00923e-05
573	0.00140013	0.000407303	0	5.36465e-05
574	0.00134474	0.000413868	0	4.79146e-05
575	0.00129804	0.000423205	0	4.23567e-05
576	0.00125928	0.00043525	0	3.65138e-05
577	0.00122742	0.000449586	0	3.01167e-05
578	0.00120125	0.000465541	0	2.30921e-05
579	0.0011795	0.000482354	0	1.55073e-05
580	0.00116103	0.000499379	0	7.4927e-06
581	0.00114488	0.000515994	0	0
582	0.00112995	0.000530293	0	0
583	0.00111615	0.000544006	0	0
584	0.00110296	0.000556936	0	0
585	0.00108992	0.000568784	0	0
586	0.00107664	0.000579246	0	0
587	0.0010629	0.000588184	0	0
588	0.00104876	0.000595735	0	0
589	0.00103446	0.000602265	0	0
590	0.00102035	0.000608187	0	0
591	0.00100669	0.000613717	0	0
592	0.000993593	0.000618737	0	0
593	0.000981009	0.000622839	0	0
594	0.000968852	0.00062555	0	0
595	0.000957156	0.00062662	0	0
596	0.000946176	0.000626219	0	0
597	0.000936369	0.000624934	0	0
598	0.000928275	0.000623588	0	0
599	0.000922349	0.000622981	0	0
600	0.000918823	0.00062369	0	0
601	0.000917636	0.000625984	0	0
602	0.000918447	0.000629859	0	0
603	0.000920697	0.000635135	0	0
604	0.000923716	0.000641558	0	0
605	0.000926846	0.000648856	0	0
606	0.000929561	0.000656765	0	0
607	0.000931556	0.000665028	0	0
608	0.000932788	0.000673396	0	0
609	0.000933448	0.000681657	0	0
610	0.000933854	0.000689686	0	0
611	0.000934231	0.000697449	0	0
612	0.000934381	0.000704863	0	0
613	0.000933327	0.000711462	0	0
614	0.000929243	0.000716052	0	0
615	0.000919977	0.000716753	0	0
616	0.000904149	0.000711671	0	0
617	0.000882175	0.000699967	0	0
618	0.000856376	0.000682583	0	0
619	0.000829958	0.000662038	0	0
620	0.000805561	0.000641378	0	0
621	0.000784408	0.000622978	0	0
622	0.000766366	0.000607849	0	0
623	0.000750425	0.000595595	0	0
624	0.000735067	0.000584775	0	0
625	0.000718559	0.000573484	0	0
626	0.000699495	0.000560067	0	0
627	0.000677504	0.000543769	0	0
628	0.000653528	0.000524977	0	0
629	0.000629335	0.000504917	0	0
630	0.000606614	0.000485031	0	0
631	0.000586303	0.000466458	0	0
632	0.000568452	0.000449814	0	0
633	0.000552513	0.000435256	0	0
634	0.00053777	0.00042266	0	0
635	0.000523692	0.000411774	0	0
636	0.000510087	0.000402289	0	0
637	0.000497017	0.000393825	0	0
638	0.000484579	0.000385901	0	0
639	0.000472728	0.000377984	0	0
640	0.000461246	0.000369611	0	0
641	0.000449848	0.000360522	0	0
642	0.000438305	0.000350706	0	0
643	0.000426507	0.000340347	0	0
644	0.00041444	0.000329702	0	0
645	0.000402147	0.000318999	0	0
646	0.000389688	0.000308406	0	0
647	0.000377137	0.000298054	0	0
648	0.00036458	0.000288084	0	0
649	0.000352114	0.000278663	0	0
650	0.000339818	0.000269965	0	0
651	0.000327426	0.000260899	0	4.88069e-06
652	0.000315071	0.000252311	0	1.11705e-05
653	0.000302665	0.000244407	0	1.72854e-05
654	0.000289989	0.00023701	0	2.26194e-05
655	0.000276838	0.000229903	0	2.65588e-05
656	0.000263109	0.000222899	0	2.87411e-05
657	0.000248861	0.000215896	0	2.92249e-05
658	0.000234307	0.000208891	0	2.84617e-05
659	0.000219754	0.000201956	0	2.70864e-05
660	0.000205527	0.000195198	0	2.56574e-05
661	0.000191901	0.000188728	0	2.4486e-05
662	0.00017907	0.000182645	0	2.36202e-05
663	0.000167133	0.00017702	0	2.29453e-05
664	0.000156062	0.000171858	0	2.23207e-05
665	0.000145676	0.000167051	0	2.16809e-05
666	0.000135655	0.000162364	0	2.10641e-05
667	0.000125654	0.000157504	0	2.05684e-05
668	0.000115484	0.000152254	0	2.02677e-05
669	0.000105256	0.000146595	0	2.01446e-05
670	9.53622e-05	0.000140727	0	2.00832e-05
671	8.63028e-05	0.000134959	0	1.99258e-05
672	7.84611e-05	0.000129566	0	1.95491e-05
673	7.19726e-05	0.000124689	0	1.89086e-05
674	6.674e-05	0.00012034	0	1.8034e-05
675	6.25412e-05	0.000116452	0	1.69927e-05
676	5.91423e-05	0.00011295	0	1.58527e-05
677	5.63635e-05	0.000109775	0	1.46625e-05
678	5.40936e-05	0.00010689	0	1.34481e-05
679	5.22753e-05	0.000104275	0	1.22204e-05
680	5.08831e-05	0.000101913	0	1.09823e-05
681	4.99041e-05	9.97907e-05	0	9.73473e-06
682	4.93259e-05	9.78918e-05	0	8.47933e-06
683	4.913e-05	9.61973e-05	0	7.219e-06
684	4.92886e-05	9.46841e-05	0	5.95751e-06
685	4.97655e-05	9.33252e-05	0	4.69898e-06
686	5.05179e-05	9.2092e-05	0	3.44792e-06
687	5.15016e-05	9.09594e-05	0	2.21022e-06
688	5.26787e-05	8.9915e-05	0	9.952e-07
689	5.40179e-05	8.89277e-05	0	0
690	5.5485e-05	8.78678e-05	0	0
691	5.71934e-05	8.71014e-05	0	0
692	5.92398e-05	8.68046e-05	0	0
693	6.17427e-05	8.7178e-05	0	0
694	6.47939e-05	8.83781e-05	0	0
695	6.83916e-05	9.04218e-05	0	0
696	7.23803e-05	9.30997e-05	0	0
697	7.64303e-05	9.59495e-05	0	0
698	8.0086e-05	9.83266e-05	0	0
699	8.28765e-05	9.95697e-05	0	0
700	8.44525e-05	9.92043e-05	0	0
701	8.46924e-05	9.71e-05	0	0
702	8.373e-05	9.35098e-05	0	0
703	8.18977e-05	8.8976e-05	0	0
704	7.96115e-05	8.41496e-05	0	0
705	7.72522e-05	7.96033e-05	0	0
706	7.50847e-05	7.57105e-05	0	0
707	7.32352e-05	7.2616e-05	0	0
708	7.1715e-05	7.02824e-05	0	0
709	7.04688e-05	6.85697e-05	0	0
710	6.9421e-05	6.73094e-05	0	0
711	6.85082e-05	6.63522e-05	0	0
712	6.76951e-05	6.55877e-05	0	0
713	6.69762e-05	6.49454e-05	0	0
714	6.63712e-05	6.43864e-05	0	0
715	6.59156e-05	6.38939e-05	0	0
716	6.55033e-05	6.33656e-05	1.21757e-06	0
717	6.53252e-05	6.29054e-05	2.42106e-06	0
718	6.54159e-05	6.25228e-05	3.57777e-06	0
719	6.57914e-05	6.2225e-05	4.6804e-06	0
720	6.64472e-05	6.20166e-05	5.72479e-06	0
721	6.73564e-05	6.1898e-05	6.71034e-06	0
722	6.84693e-05	6.18647e-05	7.63993e-06	0
723	6.9716e-05	6.1907e-05	8.51958e-06	0
724	7.10102e-05	6.20104e-05	9.35767e-06	0
725	7.22552e-05	6.21568e-05	1.01641e-05	0
726	7.33509e-05	6.23258e-05	1.09488e-05	0
727	7.42016e-05	6.24966e-05	1.17211e-05	0
728	7.47233e-05	6.26498e-05	1.2488e-05	0
729	7.4851e-05	6.27688e-05	1.32533e-05	0
730	7.45433e-05	6.28423e-05	1.40173e-05	0
731	7.3787e-05	6.28642e-05	1.47757e-05	0
732	7.2597e-05	6.28351e-05	1.55203e-05	0
733	7.10167e-05	6.27618e-05	1.62394e-05	0
734	6.91142e-05	6.26569e-05	1.69179e-05	0
735	6.69778e-05	6.25377e-05	1.75394e-05	0
736	6.47107e-05	6.24248e-05	1.80863e-05	0
737	6.24241e-05	6.23409e-05	1.85415e-05	0
738	6.02308e-05	6.23085e-05	1.88892e-05	0
739	5.82394e-05	6.2349e-05	1.91154e-05	0
740	5.65482e-05	6.2481e-05	1.92087e-05	0
741	5.52412e-05	6.27193e-05	1.916e-05	0
742	5.43838e-05	6.30738e-05	1.89626e-05	0
743	5.40212e-05	6.35491e-05	1.86115e-05	0
744	5.41763e-05	6.41443e-05	1.81034e-05	0
745	5.485e-05	6.48529e-05	1.74357e-05	0
746	5.60226e-05	6.5664e-05	1.66066e-05	0
747	5.76553e-05	6.65626e-05	1.56153e-05	0
748	5.96944e-05	6.75319e-05	1.44616e-05	0
749	6.20747e-05	6.85544e-05	1.31472e-05	0
750	6.47247e-05	6.96146e-05	1.16762e-05	0
751	6.75714e-05	7.07004e-05	1.00565e-05	0
752	7.05452e-05	7.18052e-05	8.30117e-06	0
753	7.35835e-05	7.29295e-05	6.42943e-06	0
754	7.66347e-05	7.40808e-05	4.46777e-06	0
755	7.96591e-05	7.52739e-05	2.45038e-06	0
756	8.26291e-05	7.6529e-05	4.18813e-07	0
757	8.53343e-05	7.77412e-05	0	0
758	8.79141e-05	7.90327e-05	0	0
759	9.04117e-05	8.04559e-05	0	0
760	9.28082e-05	8.20153e-05	0	0
761	9.50648e-05	8.3695e-05	0	0
762	9.71152e-05	8.54533e-05	0	0
763	9.88631e-05	8.72215e-05	0	0
764	0.000100186	8.89062e-05	0	0
765	0.000100948	9.03976e-05	0	0
766	0.000101017	9.15829e-05	0	0
767	0.000100291	9.23621e-05	0	0
768	9.87193e-05	9.26642e-05	0	0
769	9.63201e-05	9.24596e-05	0	0
770	9.31851e-05	9.17658e-05	0	0
771	8.94743e-05	9.06454e-05	0	0
772	8.53958e-05	8.91962e-05	0	0
773	8.11801e-05	8.7537e-05	0	0
774	7.70502e-05	8.5791e-05	0	0
775	7.31971e-05	8.4072e-05	0	0
776	6.97619e-05	8.24745e-05	0	0
777	6.68293e-05	8.10689e-05	0	0
778	6.44296e-05	7.99003e-05	0	0
779	6.25485e-05	7.89884e-05	0	0
780	6.114e-05	7.83269e-05	0	0
781	6.01402e-05	7.78813e-05	0	0
782	5.9479e-05	7.75885e-05	0	0
783	5.90885e-05	7.73593e-05	0	0
784	5.89067e-05	7.70894e-05	0	0
785	5.8879e-05	7.66769e-05	0	0
786	5.89569e-05	7.60436e-05	0	0
787	5.90971e-05	7.51529e-05	0	0
788	5.92614e-05	7.40183e-05	0	0
789	5.94179e-05	7.26981e-05	0	0
790	5.95427e-05	7.12798e-05	0	0
791	5.96212e-05	6.98579e-05	0	0
792	5.96466e-05	6.85144e-05	0	0
793	5.96179e-05	6.73068e-05	0	0
794	5.9536e-05	6.62645e-05	0	0
795	5.94006e-05	6.53929e-05	0	0
796	5.92082e-05	6.46813e-05	0	0
797	5.89521e-05	6.41116e-05	0	0
798	5.86239e-05	6.3664e-05	0	0
799	5.8216e-05	6.33218e-05	0	0
800	5.77235e-05	6.30727e-05	0	0
801	5.71457e-05	6.29094e-05	0	0
802	5.64101e-05	6.27779e-05	6.29462e-07	0
803	5.54729e-05	6.26437e-05	2.31871e-06	0
804	5.44512e-05	6.2579e-05	4.21379e-06	0
805	5.33659e-05	6.25925e-05	6.26827e-06	0
806	5.22429e-05	6.26959e-05	8.4099e-06	0
807	5.11116e-05	6.29031e-05	1.05421e-05	0
808	5.00037e-05	6.32296e-05	1.25489e-05	0
809	4.89517e-05	6.36906e-05	1.43031e-05	0
810	4.79868e-05	6.42994e-05	1.56777e-05	0
811	4.71372e-05	6.50654e-05	1.65591e-05	0
812	4.64262e-05	6.59915e-05	1.68601e-05	0
813	4.58703e-05	6.70729e-05	1.65311e-05	0
814	4.54787e-05	6.82957e-05	1.55677e-05	0
815	4.52533e-05	6.96375e-05	1.40132e-05	0
816	4.51899e-05	7.10691e-05	1.1955e-05	0
817	4.52807e-05	7.25576e-05	9.51583e-06	0
818	4.55173e-05	7.40706e-05	6.84183e-06	0
819	4.5894e-05	7.558e-05	4.08772e-06	0
820	4.64102e-05	7.70647e-05	1.40336e-06	0
821	4.69395e-05	7.84253e-05	0	0
822	4.74909e-05	7.96557e-05	0	0
823	4.8259e-05	8.08754e-05	0	0
824	4.92616e-05	8.2088e-05	0	0
825	5.05072e-05	8.32903e-05	0	0
826	5.19898e-05	8.44695e-05	0	0
827	5.36866e-05	8.56025e-05	0	0
828	5.55563e-05	8.66578e-05	0	0
829	5.75394e-05	8.75992e-05	0	0
830	5.95612e-05	8.83906e-05	0	0
831	6.15362e-05	8.90008e-05	0	0
832	6.33734e-05	8.94074e-05	0	0
833	6.47464e-05	8.94408e-05	1.94569e-06	0
834	6.58167e-05	8.92604e-05	3.86501e-06	0
835	6.65439e-05	8.88915e-05	5.57535e-06	0
836	6.69011e-05	8.83628e-05	6.97542e-06	0
837	6.68858e-05	8.77093e-05	7.99238e-06	0
838	6.65212e-05	8.69713e-05	8.58687e-06	0
839	6.58542e-05	8.61929e-05	8.75385e-06	0
840	6.49517e-05	8.54207e-05	8.51931e-06	0
841	6.38929e-05	8.47027e-05	7.93409e-06	0
842	6.27618e-05	8.40852e-05	7.06585e-06	0
843	6.16376e-05	8.36107e-05	5.99082e-06	0
844	6.05879e-05	8.33142e-05	4.78633e-06	0
845	5.9663e-05	8.32205e-05	3.52483e-06	0
846	5.88926e-05	8.33416e-05	2.26988e-06	0
847	5.82861e-05	8.36752e-05	1.07392e-06	0
848	5.78322e-05	8.42029e-05	0	0
849	5.73953e-05	8.48198e-05	0	0
850	5.70767e-05	8.55748e-05	0	0
851	5.68409e-05	8.64231e-05	0	0
852	5.66519e-05	8.73193e-05	0	0
853	5.64761e-05	8.82235e-05	0	0
854	5.62856e-05	8.91066e-05	0	0
855	5.60597e-05	8.99547e-05	0	0
856	5.57848e-05	9.07703e-05	0	0
857	5.54548e-05	9.1573e-05	0	0
858	5.50693e-05	9.23962e-05	0	0
859	5.46325e-05	9.32831e-05	0	0
860	5.41514e-05	9.42822e-05	0	0
861	5.36338e-05	9.54421e-05	0	0
862	5.30876e-05	9.68069e-05	0	0
863	5.24696e-05	9.8379e-05	4.1198e-07	0
864	5.17458e-05	0.000100155	1.5654e-06	0
865	5.09923e-05	0.000102192	2.88798e-06	0
866	5.0218e-05	0.000104481	4.36583e-06	0
867	4.9436e-05	0.000106998	5.97017e-06	0
868	4.86643e-05	0.0001097	7.65794e-06	0
869	4.79255e-05	0.000112527	9.37481e-06	0
870	4.72452e-05	0.000115407	1.10607e-05	0
871	4.66494e-05	0.000118261	1.26562e-05	0
872	4.616e-05	0.000121015	1.41094e-05	0
873	4.57913e-05	0.000123607	1.53814e-05	0
874	4.55467e-05	0.000125998	1.64486e-05	0
875	4.54171e-05	0.000128177	1.73033e-05	0
876	4.53811e-05	0.000130165	1.7951e-05	0
877	4.54074e-05	0.000132012	1.84061e-05	0
878	4.54598e-05	0.000133789	1.86877e-05	0
879	4.55014e-05	0.000135581	1.88148e-05	0
880	4.55008e-05	0.000137473	1.88045e-05	0
881	4.5435e-05	0.000139539	1.86708e-05	0
882	4.52929e-05	0.000141841	1.84249e-05	0
883	4.50752e-05	0.00014442	1.80769e-05	0
884	4.47932e-05	0.000147299	1.76373e-05	0
885	4.44667e-05	0.000150487	1.71178e-05	0
886	4.41204e-05	0.000153984	1.65318e-05	0
887	4.37813e-05	0.000157786	1.58943e-05	0
888	4.3476e-05	0.000161885	1.52206e-05	0
889	4.32286e-05	0.000166275	1.45253e-05	0
890	4.30595e-05	0.000170951	1.38215e-05	0
891	4.29842e-05	0.0001759	1.31196e-05	0
892	4.30127e-05	0.00018111	1.24272e-05	0
893	4.31487e-05	0.000186558	1.1749e-05	0
894	4.33884e-05	0.000192217	1.10871e-05	0
895	4.37197e-05	0.000198051	1.04419e-05	0
896	4.41221e-05	0.000204022	9.81265e-06	0
897	4.4566e-05	0.000210089	9.19855e-06	0
898	4.50149e-05	0.00021621	8.5997e-06	0
899	4.54263e-05	0.000222348	8.01779e-06	0
900	4.5756e-05	0.000228465	7.45671e-06	0
901	4.59608e-05	0.000234532	6.92281e-06	0
902	4.60031e-05	0.000240518	6.42488e-06	0
903	4.58539e-05	0.000246399	5.97371e-06	0
904	4.54955e-05	0.000252154	5.58145e-06	0
905	4.49227e-05	0.000257763	5.2607e-06	0
906	4.41422e-05	0.000263215	5.02337e-06	0
907	4.31715e-05	0.000268505	4.87964e-06	0
908	4.20354e-05	0.000273637	4.83676e-06	0
909	4.07636e-05	0.000278628	4.89819e-06	0
910	3.93863e-05	0.000283506	5.06288e-06	0
911	3.79319e-05	0.00028831	5.32501e-06	0
912	3.64245e-05	0.000293092	5.67419e-06	0
913	3.48825e-05	0.000297907	6.09612e-06	0
914	3.33188e-05	0.000302814	6.57369e-06	0
915	3.17406e-05	0.000307868	7.08825e-06	0
916	3.01512e-05	0.000313114	7.62079e-06	0
917	2.85505e-05	0.000318589	8.15278e-06	0
918	2.69366e-05	0.000324316	8.66633e-06	0
919	2.53059e-05	0.000330311	9.14371e-06	0
920	2.36547e-05	0.000336585	9.56653e-06	0
921	2.19795e-05	0.000343151	9.91478e-06	0
922	2.02788e-05	0.000350028	1.01664e-05	0
923	1.85562e-05	0.00035724	1.02978e-05	0
924	1.68236e-05	0.000364825	1.0285e-05	0
925	1.51054e-05	0.000372822	1.0106e-05	0
926	1.34426e-05	0.000381277	9.74311e-06	0
927	1.18955e-05	0.000390236	9.18453e-06	0
928	1.05436e-05	0.000399745	8.42517e-06	0
929	9.48432e-06	0.00040985	7.46626e-06	0
930	8.82783e-06	0.000420588	6.31461e-06	0
931	8.69093e-06	0.00043198	4.98245e-06	0
932	9.1892e-06	0.000444009	3.48812e-06	0
933	1.04267e-05	0.000456599	1.85602e-06	0
934	1.24817e-05	0.000469609	1.13043e-07	0
935	1.51766e-05	0.000482701	0	0
936	1.86608e-05	0.000495774	0	0
937	2.28205e-05	0.000508632	0	0
938	2.74304e-05	0.000521118	0	0
939	3.21827e-05	0.000533126	0	0
940	3.6727e-05	0.000544591	0	0
941	4.07253e-05	0.000555463	0	0
942	4.39085e-05	0.000565702	0	0
943	4.61215e-05	0.000575284	0	0
944	4.73448e-05	0.000584233	0	0
945	4.76883e-05	0.000592642	0	0
946	4.736e-05	0.000600669	0	0
947	4.66166e-05	0.000608528	0	0
948	4.57086e-05	0.000616443	0	0
949	4.48356e-05	0.00062461	0	0
950	4.41188e-05	0.000633156	0	0
951	4.35989e-05	0.00064212	0	0
952	4.32524e-05	0.000651449	0	0
953	4.30191e-05	0.000661013	0	0
954	4.28291e-05	0.000670641	0	0
955	4.26222e-05	0.000680165	0	0
956	4.2356e-05	0.000689468	0	0
957	4.20058e-05	0.000698508	0	0
958	4.15601e-05	0.000707329	0	0
959	4.10165e-05	0.000716047	0	0
960	4.03796e-05	0.000724818	0	0
961	3.96595e-05	0.000733808	0	0
962	3.88704e-05	0.000743161	0	0
963	3.8028e-05	0.000752991	0	0
964	3.71454e-05	0.000763373	0	0
965	3.6228e-05	0.00077436	0	0
966	3.52698e-05	0.000785987	0	0
967	3.42508e-05	0.000798285	0	0
968	3.31377e-05	0.000811286	0	0
969	3.18874e-05	0.000825018	0	0
970	3.04546e-05	0.000839493	0	0
971	2.88009e-05	0.000854691	0	0
972	2.69019e-05	0.000870546	0	0
973	2.47505e-05	0.000886953	0	0
974	2.23524e-05	0.000903788	0	0
975	1.97168e-05	0.000920942	0	0
976	1.68471e-05	0.000938363	0	0
977	1.37374e-05	0.000956059	0	0
978	1.03763e-05	0.00097409	0	0
979	6.75658e-06	0.000992532	0	0
980	2.88502e-06	0.00101144	0	0
981	0	0.00103079	0	0
982	0	0.00105051	0	0
983	0	0.0010706	0	0
984	0	0.001091	0	0
985	0	0.00111165	0	0
986	0	0.0011325	0	0
987	0	0.00115353	0	0
988	0	0.00117471	0	0
989	0	0.00119602	0	0
990	0	0.0012174	0	0
991	0	0.00123878	0	0
992	0	0.00126011	0	0
993	0	0.00128131	0	0
994	0	0.00130235	0	0
995	0	0.00132326	0	0
996	0	0.00134408	0	0
997	0	0.00136493	0	0
998	0	0.00138595	0	0
999	0	0.00140726	0	0
1000	0	0.00142897	0	0
1001	0	0.00145118	0	0
1002	0	0.00147391	0	0
1003	0	0.00149716	0	0
1004	0	0.0015209	0	0
1005	0	0.00154507	0	0
1006	0	0.00156957	0	0
1007	0	0.00159433	0	0
1008	0	0.00161925	0	0
1009	0	0.00164424	0	0
1010	0	0.00166923	0	0
1011	0	0.00169417	0	0
1012	0	0.00171903	0	0
1013	0	0.0017438	0	0
1014	0	0.00176848	0	0
1015	0	0.0017931	0	0
1016	0	0.00181768	0	0
1017	0	0.00184225	0	0
1018	0	0.00186683	0	0
1019	0	0.00189142	0	0
1020	0	0.001916	0	0
1021	0	0.00194049	0	0
1022	0	0.00196481	0	0
1023	0	0.00198879	0	0
1024	0	0.00201226	0	0
1025	0	0.00203504	0	0
1026	0	0.00205694	0	0
1027	0	0.0020778	0	0
1028	0	0.00209751	0	0
1029	0	0.00211605	0	0
1030	0	0.00213344	0	0
1031	0	0.00214981	0	0
1032	0	0.00216532	0	0
1033	0	0.00218018	0	0
1034	0	0.00219461	0	0
1035	0	0.0022088	0	0
1036	0	0.00222291	0	0
1037	0	0.00223703	0	0
1038	0	0.00225119	0	0
1039	0	0.00226536	0	0
1040	0	0.00227948	0	0
1041	0	0.00229354	0	0
1042	0	0.00230751	0	0
1043	0	0.00232141	0	0
1044	0	0.00233527	0	0
1045	0	0.00234903	0	0
1046	0	0.00236256	0	0
1047	0	0.00237567	0	0
1048	0	0.00238812	0	0
1049	0	0.00239972	0	0
1050	0	0.00241038	0	0
1051	0	0.00242014	0	0
1052	0	0.00242916	0	0
1053	0	0.00243762	0	0
1054	0	0.00244568	0	0
1055	0	0.00245343	0	0
1056	0	0.00246086	0	0
1057	0	0.00246791	0	0
1058	0	0.00247446	0	0
1059	0	0.00248041	0	0
1060	0	0.00248566	0	0
1061	0	0.00249013	0	0
1062	0	0.00249379	0	0
1063	0	0.00249658	0	0
1064	0	0.00249849	0	0
1065	0	0.00249955	0	0
1066	0	0.00249978	0	0
1067	0	0.00249927	0	0
1068	0	0.00249811	0	0
1069	0	0.00249639	0	0
1070	0	0.00249423	0	0
1071	0	0.00249172	0	0
1072	0	0.0024889	0	0
1073	0	0.00248583	0	0
1074	0	0.00248253	0	0
1075	0	0.00247905	0	0
1076	0	0.00247539	0	0
1077	0	0.00247151	0	0
1078	0	0.00246726	0	0
1079	0	0.0024623	0	0
1080	0	0.00245614	0	0
1081	0	0.0024482	0	0
1082	0	0.00243803	0	0
1083	0	0.00242539	0	0
1084	0	0.0024104	0	0
1085	0	0.00239347	0	0
1086	0	0.0023749	3.24808e-06	0
1087	0	0.00235522	9.94593e-06	0
1088	0	0.00233517	1.66414e-05	0
1089	0	0.00231499	2.32499e-05	0
1090	0	0.00229481	2.97815e-05	0
1091	0	0.00227468	3.62996e-05	0
1092	0	0.00225463	4.2882e-05	0
1093	0	0.0022347	4.95983e-05	0
1094	0	0.00221497	5.65026e-05	0
1095	0	0.00219548	6.36345e-05	0
1096	0	0.00217627	7.10207e-05	0
1097	0	0.00215733	7.86753e-05	0
1098	0	0.00213864	8.65965e-05	0
1099	0	0.00212013	9.47638e-05	0
1100	0	0.00210179	0.000103136	0
1101	0	0.0020836	0.000111653	0
1102	0	0.0020656	0.000120234	0
1103	0	0.00204784	0.000128791	0
1104	0	0.00203043	0.000137227	0
1105	0	0.00201347	0.000145449	0
1106	0	0.00199706	0.000153374	0
1107	0	0.00198127	0.000160935	0
1108	0	0.00196615	0.000168086	0
1109	0	0.0019517	0.000174805	0
1110	0	0.00193791	0.000181087	0
1111	0	0.00192473	0.000186945	0
1112	0	0.00191213	0.000192394	0
1113	0	0.00190007	0.000197452	0
1114	0	0.00188853	0.000202129	0
1115	0	0.00187748	0.000206422	0
1116	0	0.00186691	0.000210321	0
1117	0	0.00185678	0.000213808	0
1118	0	0.00184704	0.000216861	0
1119	0	0.0018376	0.000219459	0
1120	0	0.00182824	0.000221269	6.72316e-07
1121	0	0.00181715	0.000218416	1.04019e-05
1122	0	0.00180612	0.000214848	2.05346e-05
1123	0	0.00179519	0.00021055	3.10283e-05
1124	0	0.00178448	0.000205543	4.17589e-05
1125	0	0.00177416	0.000199871	5.25395e-05
1126	0	0.00176444	0.000193603	6.31522e-05
1127	0	0.00175549	0.000186814	7.33824e-05
1128	0	0.00174746	0.000179586	8.30473e-05
1129	0	0.00174046	0.000171997	9.20109e-05
1130	0	0.0017345	0.000164126	0.000100186
1131	0	0.00172959	0.000156053	0.000107527
1132	0	0.00172565	0.000147859	0.000114012
1133	0	0.00172259	0.000139634	0.000119635
1134	0	0.0017203	0.000131475	0.000124387
1135	0	0.00171863	0.000123483	0.00012826
1136	0	0.00171742	0.000115763	0.000131239
1137	0	0.00171652	0.000108418	0.000133312
1138	0	0.0017158	0.000101546	0.000134485
1139	0	0.00171512	9.52364e-05	0.000134789
1140	0	0.00171433	8.95685e-05	0.000134298
1141	0	0.00171329	8.46136e-05	0.000133132
1142	0	0.0017118	8.04323e-05	0.000131455
1143	0	0.00170968	7.7072e-05	0.000129455
1144	0	0.0017067	7.45592e-05	0.000127324
1145	0	0.00170272	7.28909e-05	0.000125219
1146	0	0.00169765	7.20273e-05	0.000123241
1147	0	0.00169154	7.1889e-05	0.000121415
1148	0	0.00168455	7.23636e-05	0.000119696
1149	0	0.00167689	7.33195e-05	0.000117977
1150	0	0.00166882	7.46224e-05	0.000116118
1151	0	0.00166054	7.6151e-05	0.000113969
1152	0	0.0016522	7.78057e-05	0.000111387
1153	0	0.00164386	7.9511e-05	0.000108253
1154	0	0.00163554	8.12112e-05	0.00010447
1155	0	0.00162722	8.28639e-05	9.99688e-05
1156	0	0.00161888	8.44339e-05	9.47077e-05
1157	0	0.00161049	8.58895e-05	8.86723e-05
1158	0	0.00160206	8.7202e-05	8.1879e-05
1159	0	0.0015936	8.8348e-05	7.43792e-05
1160	0	0.00158513	8.93139e-05	6.62626e-05
1161	0	0.00157663	9.01008e-05	5.76607e-05
1162	0	0.00156809	9.07286e-05	4.87442e-05
1163	0	0.00155947	9.12373e-05	3.97148e-05
1164	0	0.00155069	9.16846e-05	3.0789e-05
1165	0	0.00154169	9.21397e-05	2.21759e-05
1166	0	0.0015324	9.26735e-05	1.40532e-05
1167	0	0.00152279	9.33485e-05	6.5465e-06
1168	0	0.0015128	9.40785e-05	0
1169	0	0.00150128	9.23139e-05	0
1170	0	0.00148963	9.10263e-05	0
1171	0	0.00147789	9.01353e-05	0
1172	0	0.00146606	8.95302e-05	0
1173	0	0.00145411	8.90863e-05	0
1174	0	0.00144201	8.86819e-05	0
1175	0	0.00142972	8.82134e-05	0
1176	0	0.00141718	8.76086e-05	0
1177	0	0.00140437	8.68372e-05	0
1178	0	0.00139126	8.59147e-05	0
1179	0	0.00137788	8.4902e-05	0
1180	0	0.00136422	8.38972e-05	0
1181	0	0.00135035	8.30229e-05	0
1182	0	0.0013363	8.24102e-05	0
1183	0	0.00132212	8.21821e-05	0
1184	0	0.00130787	8.24405e-05	0
1185	0	0.0012936	8.32564e-05	0
1186	0	0.00127936	8.46666e-05	0
1187	0	0.00126517	8.66748e-05	0
1188	0	0.00125109	8.92565e-05	0
1189	0	0.00123714	9.23655e-05	0
1190	0	0.00122337	9.59418e-05	0
1191	0	0.0012098	9.99174e-05	0
1192	0	0.00119648	0.000104222	0
1193	0	0.00118345	0.000108786	0
1194	0	0.00117074	0.000113542	0
1195	0	0.00115839	0.000118428	0
1196	0	0.00114644	0.000123384	0
1197	0	0.0011349	0.000128352	0
1198	0	0.00112381	0.000133277	0
1199	0	0.00111318	0.000138102	0
1200	0	0.00110306	0.000142774	0
1201	0	0.0010935	0.000147238	0
1202	0	0.00108457	0.000151441	0
1203	0	0.00107633	0.000155332	0
1204	0	0.00106878	0.000158856	0
1205	0	0.00106182	0.000161959	0
1206	0	0.00105526	0.000164588	0
1207	0	0.00104886	0.000166696	0
1208	0	0.00104236	0.000168254	0
1209	0	0.00103562	0.000169264	0
1210	0	0.00102864	0.000169761	0
1211	0	0.00102152	0.000169808	0
1212	0	0.00101439	0.000169489	0
1213	0	0.00100731	0.000168896	0
1214	0	0.00100026	0.000168117	0
1215	0	0.000993107	0.00016723	0
1216	0	0.000985684	0.000166301	0
1217	0	0.000977834	0.000165373	0
1218	0	0.000969471	0.00016446	0
1219	0	0.000960593	0.000163544	0
1220	0	0.000951296	0.000162575	0
1221	0	0.000941748	0.000161475	0
1222	0	0.000932162	0.000160157	0
1223	0	0.00092276	0.000158534	0
1224	0	0.000913735	0.000156542	0
1225	0	0.000905228	0.000154143	0
1226	0	0.000897312	0.000151335	0
1227	0	0.000889995	0.000148149	0
1228	0	0.000883226	0.000144639	0
1229	0	0.000876908	0.00014088	0
1230	0	0.000870604	0.000136269	1.48673e-06
1231	0	0.000863683	0.000129812	6.80347e-06
1232	0	0.000856796	0.000123305	1.21976e-05
1233	0	0.000849848	0.00011687	1.75277e-05
1234	0	0.000842787	0.000110605	2.2632e-05
1235	0	0.000835614	0.000104573	2.73402e-05
1236	0	0.000828403	9.87748e-05	3.14878e-05
1237	0	0.000821295	9.31524e-05	3.49332e-05
1238	0	0.000814462	8.76043e-05	3.75796e-05
1239	0	0.000808026	8.20407e-05	3.94009e-05
1240	0	0.000801958	7.64565e-05	4.04651e-05
1241	0	0.000795993	7.09919e-05	4.09449e-05
1242	0	0.000789647	6.59334e-05	4.11001e-05
1243	0	0.000782345	6.16324e-05	4.12267e-05
1244	0	0.000773642	5.83616e-05	4.15855e-05
1245	0	0.000763432	5.61795e-05	4.23358e-05
1246	0	0.000752027	5.48777e-05	4.3505e-05
1247	0	0.000740065	5.40452e-05	4.50076e-05
1248	0	0.000728291	5.32153e-05	4.6699e-05
1249	0	0.000717324	5.20188e-05	4.84372e-05
1250	0	0.000707523	5.02736e-05	5.01246e-05
1251	0	0.000698966	4.7988e-05	5.17188e-05
1252	0	0.000691536	4.53007e-05	5.32185e-05
1253	0	0.000685034	4.2403e-05	5.46395e-05
1254	0	0.000679272	3.94754e-05	5.5989e-05
1255	0	0.000674135	3.66536e-05	5.72463e-05
1256	0	0.000669613	3.40162e-05	5.83473e-05
1257	0	0.000665808	3.15874e-05	5.91794e-05
1258	0	0.000662899	2.93494e-05	5.95947e-05
1259	0	0.000661072	2.72642e-05	5.94559e-05
1260	0	0.000660394	2.53063e-05	5.87154e-05
1261	0	0.000660669	2.34965e-05	5.75035e-05
1262	0	0.000661377	2.19201e-05	5.61729e-05
1263	0	0.000661751	2.07106e-05	5.52486e-05
1264	0	0.00066101	1.99974e-05	5.52735e-05
1265	0	0.000658656	1.98403e-05	5.66077e-05
1266	0	0.000654652	2.01873e-05	5.9286e-05
1267	0	0.000649399	2.08837e-05	6.30106e-05
1268	0	0.000643507	2.17271e-05	6.72792e-05
1269	0	0.000637525	2.25363e-05	7.15751e-05
1270	0	0.000631773	2.31985e-05	7.55203e-05
1271	0	0.000626335	2.36778e-05	7.89384e-05
1272	0	0.00062117	2.39933e-05	8.1829e-05
1273	0	0.000616235	2.41888e-05	8.42942e-05
1274	0	0.00061154	2.43099e-05	8.64626e-05
1275	0	0.000607142	2.43943e-05	8.84356e-05
1276	0	0.0006031	2.44708e-05	9.02649e-05
1277	0	0.000599435	2.4561e-05	9.19554e-05
1278	0	0.000596123	2.46793e-05	9.34829e-05
1279	0	0.000593103	2.48326e-05	9.48144e-05
1280	0	0.000590296	2.50183e-05	9.59241e-05
1281	0	0.000587626	2.52254e-05	9.68014e-05
1282	0	0.00058503	2.54363e-05	9.74521e-05
1283	0	0.000582462	2.56303e-05	9.78954e-05
1284	0	0.000579898	2.57885e-05	9.816e-05
1285	0	0.000577329	2.5897e-05	9.82796e-05
1286	0	0.000574762	2.59501e-05	9.82908e-05
1287	0	0.000572217	2.59513e-05	9.82309e-05
1288	0	0.000569719	2.59128e-05	9.81375e-05
1289	0	0.000567299	2.58537e-05	9.8047e-05
1290	0	0.00056499	2.57966e-05	9.79953e-05
1291	0	0.000562821	2.57644e-05	9.80172e-05
1292	0	0.00056082	2.57773e-05	9.81463e-05
1293	0	0.000559013	2.58501e-05	9.84145e-05
1294	0	0.000557424	2.59908e-05	9.88521e-05
1295	0	0.000556077	2.62006e-05	9.94872e-05
1296	0	0.000554995	2.6475e-05	0.000100345
1297	0	0.000554202	2.68052e-05	0.000101448
1298	0	0.000553721	2.71809e-05	0.000102814
1299	0	0.000553575	2.75925e-05	0.000104457
1300	0	0.000553781	2.80339e-05	0.000106385
1301	0	0.000554355	2.85043e-05	0.000108598
1302	0	0.000555303	2.90098e-05	0.000111087
1303	0	0.000556627	2.95642e-05	0.000113835
1304	0	0.000558323	3.01888e-05	0.000116812
1305	0	0.00056038	3.09125e-05	0.000119977
1306	0	0.000562781	3.17701e-05	0.000123279
1307	0	0.000565505	3.28007e-05	0.000126657
1308	0	0.00056853	3.40463e-05	0.000130044
1309	0	0.000571828	3.55497e-05	0.000133371
1310	0	0.000575368	3.73531e-05	0.000136572
1311	0	0.000579111	3.9497e-05	0.000139589
1312	0	0.000583011	4.2019e-05	0.000142376
1313	0	0.000587012	4.49527e-05	0.000144909
1314	0	0.000591043	4.83254e-05	0.000147185
1315	0	0.000595027	5.21557e-05	0.000149225
1316	0	0.000598878	5.64514e-05	0.00015108
1317	0	0.000602512	6.12067e-05	0.000152822
1318	0	0.000605853	6.64027e-05	0.000154543
1319	0	0.000608837	7.20085e-05	0.000156347
1320	0	0.000611417	7.79861e-05	0.000158339
1321	0	0.000613567	8.42959e-05	0.000160614
1322	0	0.000615284	9.09026e-05	0.000163246
1323	0	0.000616586	9.77804e-05	0.000166279
1324	0	0.000617514	0.000104916	0.000169722
1325	0	0.000618126	0.000112307	0.00017355
1326	0	0.000618493	0.000119963	0.00017771
1327	0	0.00061869	0.000127901	0.000182131
1328	0	0.00061879	0.00013614	0.000186732
1329	0	0.00061885	0.000144703	0.000191439
1330	0	0.000618914	0.000153606	0.000196184
1331	0	0.000619004	0.000162863	0.000200917
1332	0	0.000619123	0.000172483	0.000205603
1333	0	0.000619266	0.000182466	0.000210216
1334	0	0.000619419	0.000192803	0.000214742
1335	0	0.000619575	0.000203478	0.000219166
1336	0	0.000619735	0.000214462	0.000223473
1337	0	0.000619918	0.000225714	0.000227641
1338	0	0.000620161	0.000237183	0.000231644
1339	0	0.000620515	0.000248804	0.000235447
1340	0	0.000621039	0.000260501	0.000239017
1341	0	0.000621779	0.000272194	0.000242334
1342	0	0.000622746	0.000283802	0.0002454
1343	0	0.000623891	0.000295254	0.00024826
1344	0	0.00062508	0.000306495	0.000251012
1345	0	0.0006261	0.000317489	0.000253803
1346	0	0.000626672	0.000328225	0.00025682
1347	0	0.000626506	0.000338711	0.000260259
1348	0	0.000625359	0.000348972	0.000264278
1349	0	0.000623099	0.000359037	0.000268965
1350	0	0.000619737	0.000368943	0.000274311
1351	0	0.000615436	0.000378728	0.000280205
1352	0	0.000610471	0.000388441	0.000286457
1353	0	0.000605168	0.000398145	0.000292838
1354	0	0.000599838	0.000407926	0.000299128
1355	0	0.000594726	0.000417892	0.000305148
1356	0	0.000589991	0.000428173	0.000310786
1357	0	0.000585706	0.000438911	0.000315998
1358	0	0.000581883	0.000450255	0.000320803
1359	0	0.000578499	0.000462348	0.000325266
1360	0	0.000575517	0.000475327	0.000329486
1361	0	0.000572898	0.000489314	0.000333582
1362	0	0.000570612	0.000504416	0.000337686
1363	0	0.000568632	0.000520725	0.000341942
1364	0	0.000566933	0.000538318	0.000346487
1365	0	0.000565484	0.000557272	0.000351441
1366	0	0.000564235	0.000577674	0.000356879
1367	0	0.00056311	0.000599642	0.000362805
1368	0	0.000561999	0.000623353	0.000369126
1369	0	0.000560763	0.000649061	0.000375637
1370	0	0.000559244	0.000677113	0.000382026
1371	0	0.000557292	0.000707939	0.000387902
1372	0	0.000554786	0.000742037	0.000392848
1373	0	0.000551654	0.000779929	0.000396485
1374	0	0.000547884	0.000822116	0.000398542
1375	0	0.000543514	0.00086904	0.000398898
1376	0	0.000538612	0.000921056	0.000397611
1377	0	0.000533259	0.000978429	0.000394899
1378	0	0.000527513	0.00104136	0.000391103
1379	0	0.000521405	0.00111001	0.000386618
1380	0	0.000514922	0.00118457	0.000381825
1381	0	0.000508022	0.00126527	0.000377039
1382	0	0.000500642	0.00135241	0.000372459
1383	0	0.000492722	0.00144638	0.000368163
1384	0	0.000484222	0.00154761	0.000364107
1385	0	0.000475134	0.00165661	0.000360151
1386	0	0.000465489	0.0017739	0.000356092
1387	0	0.000455344	0.00190003	0.000351701
1388	0	0.000444764	0.0020355	0.000346758
1389	0	0.000433794	0.0021808	0.000341094
1390	0	0.000422431	0.00233639	0.000334611
1391	0	0.000410609	0.00250264	0.000327299
1392	0	0.000398205	0.00267989	0.000319219
1393	0	0.000385069	0.00286843	0.000310476
1394	0	0.000371067	0.00306851	0.000301174
1395	0	0.000356126	0.00328037	0.000291369
1396	0	0.000340258	0.00350422	0.000281048
1397	0	0.00032356	0.00374024	0.000270131
1398	0	0.000306189	0.00398854	0.000258496
1399	0	0.000288314	0.00424913	0.00024602
1400	0	0.000270084	0.00452188	0.000232613
1401	0	0.000251608	0.00480654	0.000218242
1402	0	0.000232949	0.00510266	0.000202923
1403	0	0.000214144	0.00540966	0.000186718
1404	0	0.000195214	0.00572681	0.000169709
1405	0	0.000176188	0.00605321	0.000151988
1406	0	0.000157113	0.00638786	0.000133641
1407	0	0.000138058	0.00672962	0.000114745
1408	0	0.000119112	0.00707724	9.5372e-05
1409	0	0.000100381	0.00742935	7.55857e-05
1410	0	8.19728e-05	0.00778449	5.54529e-05
1411	0	6.3985e-05	0.00814111	3.50467e-05
1412	0	4.6493e-05	0.00849761	1.44537e-05
1413	0	2.82352e-05	0.00884943	0
1414	0	7.50764e-06	0.00919107	0
1415	0	0	0.00951679	0
1416	0	0	0.00982965	0
1417	0	0	0.0101342	0
1418	0	0	0.0104288	0
1419	0	0	0.0107116	0
1420	0	0	0.010981	0
1421	0	0	0.0112354	0
1422	0	0	0.0114734	0
1423	0	0	0.0116937	0
1424	0	0	0.0118954	0
1425	0	0	0.0120775	0
1426	0	0	0.0122395	0
1427	0	0	0.012381	0
1428	0	0	0.0125015	0
1429	0	0	0.0126007	0
1430	0	0	0.0126785	0
1431	0	0	0.0127345	0
1432	0	0	0.0127682	0
1433	0	0	0.0127792	0
1434	0	0	0.0127671	0
1435	0	0	0.0127315	0
1436	0	0	0.0126721	0
1437	0	0	0.0125888	0
1438	0	0	0.0124815	0
1439	0	0	0.0123506	0
1440	0	0	0.0121964	0
1441	0	0	0.0120196	0
1442	0	0	0.0118211	0
1443	0	3.67703e-06	0.0115989	0
1444	0	2.53974e-05	0.0113423	0
1445	0	4.82544e-05	0.0110669	0
1446	0	7.21251e-05	0.0107744	0
1447	0	9.68752e-05	0.0104666	0
1448	0	0.000122366	0.0101452	0
1449	0	0.000148465	0.0098117	0
1450	0	0.000175061	0.00946772	0
1451	0	0.00020208	0.00911458	0
1452	0	0.000229499	0.00875361	0
1453	0	0.000257344	0.00838613	0
1454	0	0.000282693	0.00800717	1.41173e-05
1455	0	0.000304905	0.00761709	4.54182e-05
1456	0	0.000327226	0.00722539	7.78991e-05
1457	0	0.000349396	0.00683463	0.000111473
1458	0	0.000371029	0.00644774	0.000145857
1459	0	0.0003917	0.00606788	0.000180458
1460	0	0.000411066	0.00569826	0.000214338
1461	0	0.000428951	0.00534183	0.0002463
1462	0	0.000445368	0.00500105	0.000275123
1463	0	0.000460473	0.00467763	0.000299865
1464	0	0.000474494	0.00437246	0.000320121
1465	0	0.000487669	0.0040856	0.000336109
1466	0	0.000500204	0.00381646	0.000348576
1467	0	0.000512259	0.00356404	0.000358559
1468	0	0.000523933	0.00332715	0.000367111
1469	0	0.000535262	0.00310467	0.000375091
1470	0	0.000546239	0.00289559	0.000383059
1471	0	0.000556851	0.0026991	0.000391285
1472	0	0.000567106	0.00251451	0.000399825
1473	0	0.000576976	0.00234126	0.000408624
1474	0	0.000586284	0.00217887	0.000417617
1475	0	0.000594643	0.00202697	0.000426782
1476	0	0.000601636	0.00188524	0.000436123
1477	0	0.000607146	0.00175331	0.000445609
1478	0	0.000611517	0.00163076	0.000455134
1479	0	0.000615355	0.0015171	0.000464558
1480	0	0.000619161	0.00141185	0.000473767
1481	0	0.000623143	0.00131459	0.000482719
1482	0	0.00062727	0.00122486	0.000491435
1483	0	0.000631426	0.00114221	0.000499977
1484	0	0.000635492	0.00106613	0.000508425
1485	0	0.000639367	0.000996063	0.000516878
1486	0	0.000642954	0.000931465	0.00052544
1487	0	0.000646156	0.000871786	0.00053422
1488	0	0.000648871	0.000816499	0.000543316
1489	0	0.000651003	0.000765123	0.000552809
1490	0	0.000652471	0.000717224	0.000562747
1491	0	0.000653228	0.000672426	0.000573136
1492	0	0.000653282	0.000630411	0.000583918
1493	0	0.000652699	0.000590933	0.000594957
1494	0	0.000651589	0.00055382	0.000606026
1495	0	0.000650074	0.000518984	0.000616799
1496	0	0.000648245	0.000486426	0.000626867
1497	0	0.000646127	0.000456218	0.000635766
1498	0	0.000643676	0.000428471	0.000643034
1499	0	0.000640795	0.000403281	0.000648274
1500	0	0.000637381	0.000380679	0.000651218
1501	0	0.000633363	0.000360588	0.000651767
1502	0	0.000628727	0.000342808	0.000650004
1503	0	0.000623517	0.000327028	0.000646173
1504	0	0.000617813	0.000312865	0.000640638
1505	0	0.000611693	0.000299913	0.00063383
1506	0	0.000605197	0.000287787	0.000626203
1507	0	0.000598308	0.000276161	0.000618195
1508	0	0.000590954	0.000264788	0.000610197
1509	0	0.000583036	0.0002535	0.000602522
1510	0	0.000574463	0.000242206	0.000595377
1511	0	0.000565192	0.000230877	0.000588845
1512	0	0.000555246	0.000219536	0.000582883
1513	0	0.000544707	0.000208247	0.00057734
1514	0	0.000533695	0.000197105	0.000571989
1515	0	0.000522336	0.000186229	0.000566575
1516	0	0.000510749	0.000175754	0.000560847
1517	0	0.000499044	0.000165812	0.000554582
1518	0	0.000487331	0.000156518	0.000547607
1519	0	0.000475729	0.000147962	0.000539798
1520	0	0.000464369	0.000140193	0.000531091
1521	0	0.000453379	0.00013322	0.000521487
1522	0	0.000442867	0.000127012	0.000511053
1523	0	0.0004329	0.000121509	0.00049992
1524	0	0.000423503	0.000116628	0.000488263
1525	0	0.000414659	0.000112274	0.000476284
1526	0	0.000406322	0.000108348	0.000464187
1527	0	0.00039843	0.000104751	0.000452155
1528	0	0.000390916	0.000101396	0.000440342
1529	0	0.000383724	9.82001e-05	0.00042886
1530	0	0.00037682	9.50926e-05	0.000417786
1531	0	0.000370196	9.201e-05	0.000407159
1532	0	0.000363871	8.88973e-05	0.000396997
1533	0	0.000357868	8.57105e-05	0.000387305
1534	0	0.000352188	8.24208e-05	0.000378088
1535	0	0.000346795	7.90177e-05	0.000369358
1536	0	0.000341629	7.55067e-05	0.000361132
1537	0	0.000336646	7.19039e-05	0.000353421
1538	0	0.000331856	6.82313e-05	0.000346219
1539	0	0.00032733	6.452e-05	0.000339494
1540	0	0.000323149	6.08212e-05	0.000333191
1541	0	0.000319348	5.72152e-05	0.000327244
1542	0	0.000315876	5.38096e-05	0.000321586
1543	0	0.000312608	5.07213e-05	0.000316159
1544	0	0.000309408	4.80487e-05	0.000310916
1545	0	0.000306185	4.58472e-05	0.000305822
1546	0	0.000302927	4.41179e-05	0.000300858
1547	0	0.000299698	4.28126e-05	0.000296027
1548	0	0.000296599	4.18506e-05	0.000291351
1549	0	0.000293732	4.11394e-05	0.000286878
1550	0	0.000291169	4.05902e-05	0.000282671
1551	0	0.00028895	4.01267e-05	0.000278801
1552	0	0.000287085	3.96861e-05	0.000275337
1553	0	0.000285577	3.9217e-05	0.000272337
1554	0	0.000284427	3.86764e-05	0.000269844
1555	0	0.000283642	3.80283e-05	0.000267887
1556	0	0.000283226	3.72447e-05	0.00026648
1557	0	0.000283165	3.63073e-05	0.000265633
1558	0	0.000283417	3.52101e-05	0.000265356
1559	0	0.000283898	3.39601e-05	0.000265662
1560	0	0.000284486	3.25757e-05	0.000266574
1561	0	0.000285039	3.10832e-05	0.000268117
1562	0	0.000285417	2.95105e-05	0.00027032
1563	0	0.000285505	2.7882e-05	0.000273205
1564	0	0.00028524	2.62146e-05	0.000276785
1565	0	0.000284606	2.45167e-05	0.000281058
1566	0	0.000283637	2.27907e-05	0.00028601
1567	0	0.000282393	2.1036e-05	0.00029161
1568	0	0.000280951	1.92515e-05	0.000297819
1569	0	0.000279393	1.74371e-05	0.000304586
1570	0	0.0002778	1.55927e-05	0.000311859
1571	0	0.000276251	1.37164e-05	0.000319583
1572	0	0.000274825	1.18021e-05	0.000327707
1573	0	0.000273599	9.83731e-06	0.000336185
1574	0	0.00027266	7.80113e-06	0.000344984
1575	0	0.000272105	5.6633e-06	0.000354078
1576	0	0.000272045	3.38484e-06	0.000363451
1577	0	0.000272592	9.23853e-07	0.000373096
1578	0	0.000273737	0	0.000382707
1579	0	0.000275459	0	0.000392428
1580	0	0.000277622	0	0.000402492
1581	0	0.000280002	0	0.000412961
1582	0	0.000282485	0	0.000423846
1583	0	0.000285235	0	0.000435024
1584	0	0.000288731	0	0.000446215
1585	0	0.000293541	0	0.000457096
1586	0	0.000299842	0	0.000467626
1587	0	0.000306997	0	0.00047837
1588	0	0.000313722	0	0.000490365
1589	0	0.000318988	0	0.000504412
1590	0	0.00032286	0	0.000520389
1591	0	0.000326413	0	0.000537345
1592	0	0.000330823	0	0.000554254
1593	0	0.000336633	0	0.000570637
1594	0	0.000343735	0	0.000586572
1595	0	0.000351765	0	0.000602366
1596	0	0.000360411	0	0.000618296
1597	0	0.000369492	0	0.000634548
1598	0	0.000378912	0	0.000651258
1599	0	0.000388617	0	0.000668553
1600	0	0.000398575	0	0.000686561
1601	0	0.00040877	0	0.000705419
1602	0	0.000419202	0	0.00072526
1603	0	0.000429887	0	0.000746213
1604	0	0.00044085	0	0.000768386
1605	0	0.000452112	0	0.000791865
1606	0	0.000463691	0	0.000816702
1607	0	0.000475581	0	0.000842908
1608	0	0.000487761	0	0.000870444
1609	0	0.000500186	0	0.000899215
1610	0	0.000512798	0	0.000929063
1611	0	0.000525532	0	0.000959774
1612	0	0.000538325	0	0.000991081
1613	0	0.00055112	0	0.00102269
1614	0	0.000563864	0	0.0010543
1615	0	0.000576513	0	0.00108563
1616	0	0.000589027	0	0.00111645
1617	0	0.000601375	0	0.00114662
1618	0	0.000613533	0	0.00117606
1619	0	0.000625497	0	0.00120479
1620	0	0.000637275	0	0.0012329
1621	0	0.000648897	0	0.00126053
1622	0	0.000660402	0	0.00128787
1623	0	0.000671839	0	0.0013151
1624	0	0.000683251	0	0.00134239
1625	0	0.000694676	0	0.00136989
1626	0	0.000706125	0	0.00139775
1627	0	0.000717583	0	0.00142606
1628	0	0.000728989	0	0.00145487
1629	0	0.000740228	0	0.00148422
1630	0	0.000751129	0	0.00151404
1631	0	0.000761461	0	0.00154423
1632	0	0.000770959	0	0.0015746
1633	0	0.000779346	0	0.00160494
1634	0	0.000786381	0	0.00163503
1635	0	0.000791896	0	0.00166466
1636	0	0.000795824	0	0.00169366
1637	0	0.000798215	0	0.00172188
1638	0	0.000799224	0	0.0017492
1639	0	0.000799084	0	0.00177548
1640	0	0.000798067	0	0.00180058
1641	0	0.000796436	0	0.00182445
1642	0	0.000794401	0	0.00184706
1643	0	0.000792073	0	0.00186853
1644	0	0.000789439	0	0.00188906
1645	0	0.000786347	0	0.00190889
1646	0	0.000782539	0	0.00192826
1647	0	0.000777712	0	0.00194731
1648	0	0.000771619	0	0.00196611
1649	0	0.000764146	0	0.00198466
1650	0	0.0007553	0	0.00200294
1651	0	0.00074503	0	0.00202101
1652	0	0.000733022	0	0.00203918
1653	0	0.000718701	0	0.00205791
1654	0	0.000701587	0	0.00207766
1655	0	0.000681728	0	0.00209868
1656	0	0.000659324	1.11674e-05	0.00211898
1657	0	0.000635156	3.50731e-05	0.00213824
1658	0	0.000610297	6.02297e-05	0.0021587
1659	0	0.000585036	8.67554e-05	0.00218068
1660	0	0.000559522	0.000114832	0.00220467
1661	0	0.000534244	0.000144786	0.00223146
1662	0	0.000510592	0.000177237	0.00226252
1663	0	0.000489635	0.000212636	0.00229899
1664	0	0.000468261	0.000249885	0.0023385
1665	0	0.000440876	0.000286921	0.00237666
1666	0	0.000408129	0.000323808	0.00241417
1667	0	0.000375688	0.000362315	0.00245582
1668	0	0.00034567	0.000402933	0.0025036
1669	0	0.000316585	0.000444885	0.00255662
1670	0	0.000287069	0.000487462	0.00261415
1671	5.24118e-06	0.000256537	0.000530092	0.00267617
1672	1.06898e-05	0.000225021	0.000572787	0.00274285
1673	1.48568e-05	0.000192652	0.000615549	0.00281425
1674	1.79785e-05	0.000159633	0.000658485	0.00289017
1675	2.03881e-05	0.000126215	0.000701942	0.00296998
1676	2.24295e-05	9.26193e-05	0.000746542	0.00305258
1677	2.43809e-05	5.89746e-05	0.000793143	0.00313648
1678	2.64174e-05	2.52985e-05	0.000842677	0.00322
1679	2.39483e-05	0	0.000893087	0.00329529
1680	7.62929e-06	0	0.00093906	0.00334861
1681	0	0	0.00098831	0.00339873
1682	0	0	0.00104014	0.00344627
1683	0	0	0.0010939	0.00349241
1684	0	0	0.00114863	0.00353822
1685	0	0	0.00120364	0.00358444
1686	0	0	0.00125862	0.00363129
1687	0	0	0.00131362	0.00367852
1688	0	0	0.00136883	0.0037256
1689	0	0	0.00142453	0.00377186
1690	0	0	0.00148091	0.0038167
1691	0	0	0.00153806	0.00385961
1692	0	0	0.00159602	0.00390018
1693	0	0	0.00165476	0.00393807
1694	0	0	0.00171427	0.00397296
1695	0	0	0.00177456	0.00400456
1696	0	0	0.00183569	0.00403255
1697	0	0	0.00189778	0.00405661
1698	0	0	0.00196103	0.0040764
1699	0	0	0.00202572	0.0040916
1700	0	0	0.00209224	0.0041019
1701	0	0	0.00216102	0.00410701
1702	0	0	0.00223252	0.00410669
1703	0	0	0.00230714	0.00410073
1704	0	0	0.00238509	0.00408902
1705	0	0	0.00246629	0.00407156
1706	0	0	0.00255026	0.00404844
1707	0	0	0.00263608	0.00401992
1708	0	0	0.00272245	0.00398635
1709	0	0	0.00280785	0.00394818
1710	0	0	0.00289077	0.0039059
1711	0	0	0.00297001	0.00385995
1712	0	0	0.00304487	0.00381071
1713	0	0	0.00311529	0.00375844
1714	0	0	0.00318182	0.00370327
1715	0	0	0.00324544	0.00364528
1716	8.33477e-07	0	0.00330724	0.00358452
1717	2.64566e-05	0	0.003367	0.00352076
1718	5.27269e-05	0	0.0034263	0.00345474
1719	7.94572e-05	0	0.00348477	0.003387
1720	0.000106543	0	0.00354109	0.00331828
1721	0.000133908	0	0.00359288	0.00324942
1722	0.000161443	0	0.00363679	0.00318127
1723	0.000189005	0	0.00366866	0.00311466
1724	0.000216499	0	0.00368396	0.00305043
1725	0.000244005	0	0.00367838	0.00298956
1726	0.000271817	0	0.00364868	0.00293314
1727	0.000300336	0	0.00359349	0.00288225
1728	0.000329843	0	0.00351386	0.0028377
1729	0.000360284	0	0.00341338	0.00279973
1730	0.000391198	0	0.00329763	0.00276798
1731	0.000421816	0	0.00317321	0.00274152
1732	0.000451234	0	0.00304657	0.002719
1733	0.000478563	0	0.00292309	0.00269889
1734	0.000503044	0	0.00280644	0.0026797
1735	0.000524141	0	0.00269859	0.00266024
1736	0.000541594	0	0.00259997	0.00263992
1737	0.0005554	0	0.00250996	0.0026188
1738	0.000565695	0	0.00242737	0.00259746
1739	0.00057264	0	0.00235081	0.00257666
1740	0.000575639	1.3401e-06	0.00227855	0.00255601
1741	0.00056751	1.7369e-05	0.00220516	0.0025258
1742	0.000556772	3.31427e-05	0.00213487	0.00249742
1743	0.000543786	4.86988e-05	0.00206727	0.0024707
1744	0.00052894	6.41222e-05	0.00200211	0.00244534
1745	0.000512596	7.9488e-05	0.00193926	0.00242096
1746	0.000495068	9.47732e-05	0.00187867	0.00239717
1747	0.000476633	0.000109774	0.00182035	0.0023737
1748	0.000457555	0.000124073	0.00176432	0.00235039
1749	0.000438104	0.000137085	0.0017106	0.00232722
1750	0.00041855	0.000148182	0.00165915	0.00230431
1751	0.000399125	0.000156873	0.00160984	0.00228182
1752	0.000379982	0.00016294	0.00156239	0.00225988
1753	0.000361165	0.000166497	0.0015164	0.00223859
1754	0.000342614	0.000167938	0.00147144	0.00221799
1755	0.000324197	0.000167798	0.00142704	0.00219812
1756	0.000305767	0.000166606	0.00138284	0.00217907
1757	0.0002872	0.000164769	0.00133857	0.00216102
1758	0.000268425	0.000162533	0.00129408	0.00214422
1759	0.000249441	0.000159992	0.00124933	0.00212898
1760	0.000230312	0.000157142	0.00120432	0.0021156
1761	0.000211162	0.000153929	0.00115909	0.00210435
1762	0.000192155	0.0001503	0.00111367	0.00209542
1763	0.000173479	0.00014623	0.00106811	0.00208893
1764	0.000155317	0.000141749	0.00102246	0.0020849
1765	0.000137823	0.000136942	0.000976754	0.00208328
1766	0.000121106	0.000131951	0.000931072	0.00208392
1767	0.000105218	0.000126957	0.000885492	0.00208666
1768	9.01606e-05	0.000122163	0.000840123	0.00209126
1769	7.58913e-05	0.000117769	0.0007951	0.00209745
1770	6.23401e-05	0.000113952	0.000750594	0.0021049
1771	4.94273e-05	0.000110854	0.000706815	0.00211327
1772	3.70816e-05	0.000108579	0.000664014	0.00212216
1773	2.52591e-05	0.000107193	0.00062249	0.00213114
1774	1.39644e-05	0.000106743	0.000582599	0.00213978
1775	3.27377e-06	0.000107268	0.000544772	0.00214761
1776	0	0.00010868	0.000509239	0.00215421
1777	0	0.00011114	0.000476653	0.00215916
1778	0	0.000114774	0.000447408	0.00216216
1779	0	0.00011954	0.000421244	0.00216302
1780	0	0.000125232	0.00039718	0.00216173
1781	0	0.000131459	0.000373688	0.00215844
1782	0	0.00013771	0.000349276	0.00215346
1783	0	0.000143495	0.000323166	0.00214711
1784	0	0.000148444	0.000295584	0.00213968
1785	0	0.000152352	0.00026745	0.00213134
1786	0	0.000155143	0.000239723	0.00212222
1787	0	0.000156845	0.00021289	0.00211248
1788	0	0.000157587	0.000186835	0.00210237
1789	0	0.000157612	0.000161031	0.00209233
1790	0	0.000157268	0.000134851	0.00208285
1791	0	0.000156934	0.000107874	0.00207431
1792	0	0.000156902	8.01276e-05	0.0020666
1793	0	0.000157262	5.22271e-05	0.00205897
1794	0	0.000157854	2.52803e-05	0.00205004
1795	0	0.000158347	5.24562e-07	0.00203826
1796	0	0.000157577	0	0.00201874
1797	0	0.000156286	0	0.00199579
1798	0	0.000154517	0	0.00197049
1799	0	0.000152453	0	0.00194445
1800	0	0.000150331	0	0.00191931
1801	0	0.000148337	0	0.00189619
1802	0	0.000146557	0	0.00187557
1803	0	0.000144982	0	0.00185734
1804	0	0.000143543	0	0.00184105
1805	0	0.000142143	0	0.00182614
1806	0	0.000140672	0	0.00181209
1807	0	0.000139027	0	0.00179838
1808	0	0.00013714	0	0.00178456
1809	0	0.000135029	0	0.00177024
1810	0	0.000132857	0	0.0017551
1811	0	0.000130955	0	0.00173893
1812	0	0.000129755	0	0.00172174
1813	0	0.000129592	0	0.0017038
1814	0	0.00013045	0	0.00168578
1815	0	0.000131775	0	0.00166868
1816	0	0.000132592	0	0.00165373
1817	0	0.000131909	0	0.00164199
1818	0	0.000129243	0	0.00163404
1819	0	0.000124882	0	0.0016298
1820	0	0.000119721	0	0.00162871
1821	0	0.000114778	0	0.00163008
1822	0	0.000110715	0	0.00163343
1823	0	0.000107651	0	0.00163869
1824	0	0.000105255	0	0.00164608
1825	0	0.000102994	0	0.00165598
1826	0	0.000100365	0	0.00166876
1827	0	9.70226e-05	0	0.00168468
1828	0	9.28353e-05	0	0.00170379
1829	0	8.78857e-05	0	0.0017259
1830	0	8.2455e-05	0	0.00175055
1831	0	7.69974e-05	0	0.00177696
1832	0	7.20909e-05	0	0.00180408
1833	0	6.83243e-05	0	0.00183064
1834	0	6.60915e-05	0	0.00185541
1835	0	6.53623e-05	0	0.00187744
1836	0	6.56208e-05	0	0.00189623
1837	0	6.61292e-05	0	0.0019116
1838	0	6.64031e-05	0	0.00192334
1839	0	6.65164e-05	0	0.00193103
1840	0	6.69576e-05	0	0.00193417
1841	0	6.8172e-05	0	0.00193247
1842	0	7.01875e-05	0	0.00192619
1843	0	7.25755e-05	0	0.00191602
1844	0	7.46749e-05	0	0.00190288
1845	0	7.58641e-05	0	0.00188763
1846	0	7.57418e-05	0	0.00187088
1847	0	7.41981e-05	0	0.00185295
1848	0	7.14049e-05	0	0.00183388
1849	0	6.77549e-05	0	0.00181353
1850	0	6.37693e-05	0	0.00179163
1851	0	5.99994e-05	0	0.00176792
1852	0	5.69414e-05	0	0.00174225
1853	0	5.49811e-05	0	0.00171457
1854	0	5.43693e-05	0	0.00168498
1855	0	5.52196e-05	0	0.00165371
1856	0	5.75216e-05	0	0.00162109
1857	0	6.11591e-05	0	0.00158751
1858	0	6.59321e-05	0	0.00155338
1859	0	7.15791e-05	0	0.00151911
1860	0	7.78041e-05	0	0.00148512
1861	0	8.4304e-05	0	0.00145181
1862	0	9.07972e-05	0	0.00141953
1863	0	9.70431e-05	0	0.0013886
1864	0	0.000102842	0	0.00135928
1865	0	0.000108012	0	0.00133168
1866	0	0.000112349	0	0.00130577
1867	0	0.000115611	0	0.00128137
1868	0	0.000117551	0	0.00125816
1869	0	0.000118007	0	0.00123585
1870	0	0.000117011	0	0.00121424
1871	0	0.000114824	0	0.00119332
1872	0	0.000111881	0	0.00117327
1873	0	0.000108657	0	0.00115436
1874	0	0.000105543	0	0.00113688
1875	0	0.000102772	0	0.00112103
1876	0	0.000100427	0	0.00110692
1877	0	9.84893e-05	0	0.00109458
1878	0	9.68911e-05	0	0.00108393
1879	0	9.55608e-05	0	0.00107483
1880	0	9.44471e-05	0	0.00106709
1881	0	9.353e-05	0	0.00106045
1882	0	9.28224e-05	0	0.00105464
1883	0	9.23649e-05	0	0.00104932
1884	0	9.22158e-05	0	0.00104419
1885	0	9.2441e-05	0	0.00103897
1886	0	9.31025e-05	0	0.00103345
1887	0	9.42481e-05	0	0.00102753
1888	0	9.58968e-05	0	0.00102124
1889	0	9.80161e-05	0	0.00101468
1890	0	0.000100493	0	0.00100806
1891	0	0.000103109	0	0.00100167
1892	0	0.000105545	0	0.000995755
1893	0	0.000107433	0	0.000990569
1894	0	0.000108448	0	0.000986257
1895	0	0.000108405	0	0.000982851
1896	0	0.000107306	0	0.000980258
1897	0	0.000105308	0	0.000978284
1898	0	0.000102649	0	0.000976681
1899	0	9.95592e-05	0	0.00097519
1900	0	9.621e-05	0	0.00097358
1901	0	9.27026e-05	0	0.000971678
1902	0	8.90858e-05	0	0.000969369
1903	0	8.53768e-05	0	0.000966601
1904	0	8.15755e-05	0	0.00096338
1905	0	7.76725e-05	0	0.000959756
1906	0	7.3654e-05	0	0.000955812
1907	0	6.95085e-05	0	0.000951649
1908	0	6.52355e-05	0	0.000947384
1909	0	6.08553e-05	0	0.000943134
1910	0	5.64178e-05	0	0.000939029
1911	0	5.20071e-05	0	0.000935196
1912	0	4.77405e-05	0	0.000931754
1913	0	4.37621e-05	0	0.000928773
1914	0	4.02377e-05	0	0.000926221
1915	0	3.73625e-05	0	0.000923893
1916	0	3.53891e-05	0	0.000921372
1917	0	3.4639e-05	0	0.000918053
1918	0	3.54024e-05	0	0.000913305
1919	0	3.76521e-05	0	0.000906787
1920	0	4.07205e-05	0	0.000898755
1921	0	4.33314e-05	0	0.000890045
1922	0	4.42011e-05	0	0.000881606
1923	0	4.28026e-05	0	0.000873898
1924	0	3.95763e-05	0	0.000866726
1925	0	3.54228e-05	0	0.000859617
1926	0	3.10641e-05	0	0.000852298
1927	0	2.68353e-05	0	0.000844833
1928	0	2.28627e-05	0	0.000837433
1929	0	1.92584e-05	0	0.000830231
1930	0	1.61464e-05	0	0.000823201
1931	0	1.36054e-05	0	0.000816196
1932	0	1.1647e-05	0	0.000809002
1933	0	1.02487e-05	0	0.000801394
1934	0	9.39484e-06	0	0.000793169
1935	0	9.08975e-06	0	0.000784185
1936	0	9.34332e-06	0	0.000774393
1937	0	1.01479e-05	0	0.000763846
1938	0	1.14642e-05	0	0.000752702
1939	0	1.32266e-05	0	0.000741187
1940	0	1.53749e-05	0	0.000729561
1941	0	1.79173e-05	0	0.000718055
1942	0	2.09925e-05	0	0.000706828
1943	0	2.48221e-05	0	0.000695984
1944	0	2.94484e-05	0	0.000685675
1945	0	3.44127e-05	0	0.000676239
1946	0	3.88389e-05	0	0.000668134
1947	0	4.20856e-05	0	0.000661602
1948	0	4.43232e-05	0	0.000656365
1949	0	4.63034e-05	0	0.000651692
1950	0	4.85879e-05	0	0.000646772
1951	0	5.11286e-05	0	0.000641018
1952	0	5.35066e-05	0	0.000634121
1953	0	5.53792e-05	0	0.000626007
1954	0	5.66945e-05	0	0.000616789
1955	0	5.76368e-05	0	0.000606736
1956	0	5.84701e-05	0	0.000596206
1957	0	5.94119e-05	0	0.00058557
1958	0	6.05835e-05	0	0.000575135
1959	0	6.20204e-05	0	0.000565108
1960	4.03655e-08	6.37097e-05	0	0.000555593
1961	6.51509e-07	6.56093e-05	0	0.000546606
1962	1.15907e-06	6.76955e-05	0	0.000538122
1963	1.66201e-06	6.99062e-05	0	0.000530096
1964	2.2241e-06	7.21456e-05	0	0.00052249
1965	2.87297e-06	7.42849e-05	0	0.000515288
1966	3.60935e-06	7.61867e-05	0	0.000508496
1967	4.42e-06	7.77467e-05	0	0.000502121
1968	5.28833e-06	7.89346e-05	0	0.000496167
1969	6.1999e-06	7.98092e-05	0	0.00049062
1970	7.14309e-06	8.04991e-05	0	0.000485452
1971	8.10651e-06	8.11564e-05	0	0.00048063
1972	9.07617e-06	8.19062e-05	0	0.000476129
1973	1.0036e-05	8.28162e-05	0	0.000471932
1974	1.09778e-05	8.38987e-05	0	0.00046803
1975	1.19283e-05	8.51449e-05	0	0.000464402
1976	1.29993e-05	8.65824e-05	0	0.000460985
1977	1.44453e-05	8.83341e-05	0	0.000457641
1978	1.66701e-05	9.06401e-05	0	0.000454147
1979	2.0079e-05	9.37803e-05	0	0.000450257
1980	2.4725e-05	9.78662e-05	0	0.000445863
1981	2.99001e-05	0.000102584	0	0.000441187
1982	3.40615e-05	0.000107105	0	0.000436833
1983	3.54021e-05	0.000110357	0	0.000433561
1984	3.28554e-05	0.000111526	0	0.000431862
1985	2.68077e-05	0.000110442	0	0.000431657
1986	1.89218e-05	0.000107538	0	0.000432356
1987	1.12175e-05	0.000103484	0	0.000433214
1988	5.1291e-06	9.88419e-05	0	0.000433679
1989	1.12185e-06	9.39753e-05	0	0.000433521
1990	0	8.90895e-05	0	0.000432742
1991	0	8.43842e-05	0	0.000431468
1992	0	7.99935e-05	0	0.000429832
1993	0	7.59632e-05	0	0.000427929
1994	0	7.22934e-05	0	0.000425814
1995	0	6.8994e-05	0	0.00042349
1996	0	6.61515e-05	0	0.000420884
1997	0	6.39641e-05	0	0.000417837
[truncated: 2,003 more rows]
[truncated: 71 more columns]

## Sheet: 5 Sources
Reconstructed Source Distributions								Compare Input & Reconstructed Sink Samples					Sink Sample Weights
Age (Ma)	Source 1	Source 2	Source 3	Source 4	Source 5				Mean		St. Dev.			Princeton, Bluestone, Hinton	Surprise Canyon3- 06GC149, Surprise_Cyn2, SurpriseC_Cngl	24PL09, 10JM94, 40JM94, 05PL15, 09LB04	Mauch_Chunk	KY-21-SG	Tonka	Stanley, Hot_spring	BC05	09-CM-699	MS11, MS10	MS01, MSGE313	BC01, BC02, CC01	ML01, MP-DZ1	1QZ19	SY-D, Watahomigi, Manakacha1	Tumbling Run, Pottsville Fm, OH-1-SS	Pocohontas, Lee, VA-1-GN	Racoon, Montevallo, Sewanee	KY-18-CB	OH-4-SN	BCRA-01-10	MB1-3, MB2-4, MB2-2, MB2-3, MB2-5, MB2-1, MB1-2, MB1-1	a16, a23, a29, a38, a48, a49, a50	46-1, 46-2	IB_AD, IB_M1, IB_M2	FCB_AD	FCB_A2	FCB_A1	S3	GS01, GS09	MS04, MS05, MS06	MC05, MC17	GS11, GS24	MC20	EC01, RC01, RC19	V01, V10, V18, V20
0	9.2911e-13	1.98908e-13	0	0	7.91796e-13			Cross-correlation	0.766632	±	0.162803		Weights Source 1	0.94317	0.683741	0	0.924154	0.740133	0	0.804247	0.0478899	0.83519	0.478951	0.348262	0.106992	0.871454	0.308288	0.36494	0.922047	0.916411	0.879265	0.68788	0.943042	0.863234	0.747581	0.719143	0.765951	0.733799	0.796055	0.743736	0.834002	0.776245	0.237329	0.963494	0.236597	0.0143274	0.303432	0.165289	0
1	9.54154e-13	2.04254e-13	0	0	8.11792e-13			Likeness	0.770547	±	0.084081		Weights Source 2	0.00623684	0.154645	0.99977	0	0.162281	1	0.079585	0.613873	0.0743539	0.136516	0	0.100435	0.0600479	0.541935	0.460979	0.0351881	0	0.0743766	0.250726	0.0214678	0.106022	0.187245	0.193245	0.160703	0.20753	0.0941932	0.150983	0.135339	0.109942	0.305947	0	0.356919	0	0.375253	0.222892	0.18803
2	9.79861e-13	2.09745e-13	0	0	8.32275e-13			Kuiper V Value	0.141419	±	0.0862003		Weights Source 3	0.0401754	0.0800137	0	0.0677633	0.0421412	0	0.0228538	0.220886	0.0655842	0.267372	0.194378	0.211816	0.0528968	0.0662654	0.0377421	0.0226165	0.0756603	0.0173489	0.025612	0.0279481	0.0234065	0.0284636	0.0426326	0.0395385	0.0149623	0.0829955	0.0512456	0.0226519	0.0212574	0.20534	0.036506	0.174486	0.492356	0.208321	0.104664	0.0052541
3	1.00625e-12	2.15383e-13	0	0	8.53255e-13			KS D Value	0.110274	±	0.0774948		Weights Source 4	0.0104177	0.0808205	0	0.000983823	0.0537075	0	0.0133557	0.111039	0	0.11716	0.457359	0.531106	0.00619989	0.0823983	0.135207	0.00685091	0.00792825	0.0290093	0.035782	0.00754217	0	0.036711	0.0449793	0.0338077	0.0403778	0.0197636	0.0512788	0.00800766	0.0524548	0.251384	0	0.221056	0.493317	0.102933	0.492447	0.805585
4	1.03333e-12	2.21174e-13	0	0	8.74745e-13								Weights Source 5	0	0.000779808	0.000230445	0.00709897	0.00173767	0	0.079958	0.00631209	0.0248716	0	0	0.0496516	0.00940167	0.00111385	0.00113151	0.0132979	0	0	0	0	0.00733683	0	0	0	0.003331	0.00699264	0.00275639	0	0.0401013	0	0	0.0109415	0	0.0100608	0.0147085	0.00113124
5	1.06113e-12	2.2712e-13	0	0	8.96757e-13			Number of sink samples	108
6	1.08967e-12	2.33226e-13	0	0	9.19301e-13			Mean Cross-correlation of sink samples	0.318				Cross-correlation	0.91894	0.940092	0.579707	0.848401	0.927822	0.550895	0.776964	0.575221	0.71179	0.817699	0.878388	0.887213	0.839152	0.705761	0.848726	0.659412	0.820873	0.773561	0.834055	0.893629	0.871387	0.838243	0.840063	0.833338	0.905871	0.909099	0.918245	0.786607	0.89119	0.900058	0.52642	0.86693	0.943146	0.746982	0.836431	0.98401
7	1.11896e-12	2.39497e-13	0	0	9.42392e-13			Range Cross-correlation of sink samples	0.962				Likeness	0.836402	0.884545	0.610617	0.804331	0.858888	0.575184	0.752687	0.55838	0.760444	0.719135	0.771482	0.780387	0.820892	0.786351	0.827749	0.756535	0.768397	0.714682	0.777731	0.841373	0.799063	0.792119	0.84351	0.804928	0.868453	0.84863	0.870677	0.722546	0.839169	0.793985	0.409157	0.76461	0.831223	0.734296	0.791282	0.867671
8	1.14902e-12	2.45936e-13	0	0	9.6604e-13			Mean Kuiper V value of sink samples	0.409				Kuiper V Value	0.126778	0.0638208	0.367548	0.105354	0.0735405	0.377046	0.129279	0.269182	0.0956616	0.237272	0.0996451	0.0910595	0.0884038	0.15807	0.114355	0.11613	0.180456	0.147491	0.106131	0.0613867	0.0817214	0.143574	0.103699	0.142895	0.0636008	0.0636058	0.062251	0.16975	0.0956225	0.159249	0.558522	0.157983	0.0869489	0.175873	0.134143	0.0497202
9	1.17987e-12	2.52548e-13	0	0	9.9026e-13			Range Kuiper V value of sink samples	0.952				KS D Value	0.125029	0.0480373	0.299417	0.068804	0.0658905	0.303635	0.0679935	0.220441	0.0819911	0.184954	0.0893252	0.0528633	0.0730482	0.113031	0.0612882	0.0951118	0.161031	0.142468	0.0612011	0.0397681	0.0487792	0.141674	0.0979281	0.126756	0.031965	0.0488412	0.0394657	0.166822	0.0534613	0.0879829	0.296086	0.0974962	0.0526624	0.136728	0.0818155	0.024953
10	1.21153e-12	2.59337e-13	0	0	1.01506e-12			Final Residual	0.183007
11	1.24403e-12	2.66308e-13	0	0	1.04047e-12			Number of Iterations	160
12	1.27739e-12	2.73466e-13	0	0	1.06648e-12
13	1.31162e-12	2.80815e-13	0	0	1.09312e-12
14	1.34675e-12	2.88361e-13	0	0	1.1204e-12
15	1.3828e-12	2.96109e-13	0	0	1.14833e-12
16	1.4198e-12	3.04064e-13	0	0	1.17693e-12
17	1.45777e-12	3.12231e-13	0	0	1.20622e-12
18	1.49673e-12	3.20616e-13	0	0	1.2362e-12
19	1.53671e-12	3.29224e-13	0	0	1.26691e-12
20	1.57774e-12	3.38062e-13	0	0	1.29834e-12
21	1.61985e-12	3.47135e-13	0	0	1.33053e-12
22	1.66305e-12	3.5645e-13	0	0	1.36348e-12
23	1.70739e-12	3.66012e-13	0	0	1.39721e-12
24	1.75288e-12	3.75828e-13	0	0	1.43175e-12
25	1.79955e-12	3.85905e-13	0	0	1.46711e-12
26	1.84745e-12	3.96249e-13	0	0	1.5033e-12
27	1.89659e-12	4.06867e-13	0	0	1.54035e-12
28	1.94701e-12	4.17767e-13	0	0	1.57828e-12
29	1.99875e-12	4.28956e-13	0	0	1.6171e-12
30	2.05183e-12	4.4044e-13	0	0	1.65684e-12
31	2.10629e-12	4.52229e-13	0	0	1.69751e-12
32	2.16216e-12	4.64329e-13	0	0	1.73915e-12
33	2.21948e-12	4.76749e-13	0	0	1.78176e-12
34	2.27829e-12	4.89496e-13	0	0	1.82537e-12
35	2.33863e-12	5.02581e-13	0	0	1.87001e-12
36	2.40053e-12	5.1601e-13	0	0	1.91569e-12
37	2.46403e-12	5.29794e-13	0	0	1.96245e-12
38	2.52917e-12	5.4394e-13	0	0	2.0103e-12
39	2.596e-12	5.5846e-13	0	0	2.05926e-12
40	2.66456e-12	5.73362e-13	0	0	2.10937e-12
41	2.73488e-12	5.88656e-13	0	0	2.16065e-12
42	2.80702e-12	6.04353e-13	0	0	2.21312e-12
43	2.88103e-12	6.20463e-13	0	0	2.26682e-12
44	2.95694e-12	6.36996e-13	0	0	2.32176e-12
45	3.0348e-12	6.53965e-13	0	0	2.37798e-12
46	3.11467e-12	6.71379e-13	0	0	2.43551e-12
47	3.19659e-12	6.89252e-13	0	0	2.49437e-12
48	3.28062e-12	7.07594e-13	0	0	2.55459e-12
49	3.36681e-12	7.26418e-13	0	0	2.61621e-12
50	3.45521e-12	7.45738e-13	0	0	2.67925e-12
51	3.54588e-12	7.65565e-13	0	0	2.74375e-12
52	3.63888e-12	7.85914e-13	0	0	2.80973e-12
53	3.73426e-12	8.06798e-13	0	0	2.87724e-12
54	3.83208e-12	8.28231e-13	0	0	2.94631e-12
55	3.93241e-12	8.50228e-13	0	0	3.01696e-12
56	4.0353e-12	8.72805e-13	0	0	3.08924e-12
57	4.14083e-12	8.95976e-13	0	0	3.16318e-12
58	4.24905e-12	9.19758e-13	0	0	3.23882e-12
59	4.36003e-12	9.44167e-13	0	0	3.3162e-12
60	4.47385e-12	9.6922e-13	0	0	3.39535e-12
61	4.59057e-12	9.94935e-13	0	0	3.47632e-12
62	4.71027e-12	1.02133e-12	0	0	3.55914e-12
63	4.83302e-12	1.04842e-12	0	0	3.64386e-12
64	4.95889e-12	1.07623e-12	0	0	3.73052e-12
65	5.08797e-12	1.10478e-12	0	0	3.81916e-12
66	5.22033e-12	1.13409e-12	0	0	3.90982e-12
67	5.35606e-12	1.16418e-12	0	0	4.00256e-12
68	5.49524e-12	1.19506e-12	0	0	4.09742e-12
69	5.63795e-12	1.22677e-12	0	0	4.19444e-12
70	5.78428e-12	1.25933e-12	0	0	4.29368e-12
71	5.93433e-12	1.29276e-12	0	0	4.39518e-12
72	6.08818e-12	1.32709e-12	0	0	4.499e-12
73	6.24593e-12	1.36234e-12	0	0	4.60519e-12
74	6.40768e-12	1.39854e-12	0	0	4.7138e-12
75	6.57353e-12	1.43572e-12	0	0	4.82489e-12
76	6.74358e-12	1.4739e-12	0	0	4.93851e-12
77	6.91792e-12	1.51313e-12	0	0	5.05472e-12
78	7.09668e-12	1.55342e-12	0	0	5.17359e-12
79	7.27996e-12	1.59481e-12	0	0	5.29517e-12
80	7.46787e-12	1.63733e-12	0	0	5.41952e-12
81	7.66052e-12	1.68103e-12	0	0	5.54672e-12
82	7.85804e-12	1.72593e-12	0	0	5.67682e-12
83	8.06055e-12	1.77207e-12	0	0	5.80989e-12
84	8.26817e-12	1.8195e-12	0	0	5.94601e-12
85	8.48102e-12	1.86825e-12	0	0	6.08525e-12
86	8.69925e-12	1.91837e-12	0	0	6.22767e-12
87	8.92297e-12	1.9699e-12	0	0	6.37336e-12
88	9.15234e-12	2.02288e-12	0	0	6.5224e-12
89	9.38749e-12	2.07738e-12	0	0	6.67486e-12
90	9.62856e-12	2.13343e-12	0	0	6.83082e-12
91	9.8757e-12	2.19109e-12	0	0	6.99038e-12
92	1.01291e-11	2.25041e-12	0	0	7.15362e-12
93	1.03888e-11	2.31146e-12	0	0	7.32063e-12
94	1.06551e-11	2.37428e-12	0	0	7.4915e-12
95	1.09281e-11	2.43896e-12	0	0	7.66634e-12
96	1.1208e-11	2.50554e-12	0	0	7.84523e-12
97	1.14949e-11	2.57411e-12	0	0	8.02829e-12
98	1.1789e-11	2.64472e-12	0	0	8.21562e-12
99	1.20905e-11	2.71747e-12	0	0	8.40733e-12
100	1.23997e-11	2.79242e-12	0	0	8.60353e-12
101	1.27166e-11	2.86966e-12	0	0	8.80434e-12
102	1.30415e-11	2.94928e-12	0	0	9.00988e-12
103	1.33745e-11	3.03136e-12	0	0	9.22028e-12
104	1.3716e-11	3.11601e-12	0	0	9.43566e-12
105	1.4066e-11	3.20333e-12	0	0	9.65616e-12
106	1.44249e-11	3.29342e-12	0	0	9.88193e-12
107	1.47928e-11	3.38638e-12	0	0	1.01131e-11
108	1.517e-11	3.48235e-12	0	0	1.03498e-11
109	1.55567e-11	3.58144e-12	0	0	1.05923e-11
110	1.59531e-11	3.68379e-12	0	0	1.08406e-11
111	1.63596e-11	3.78952e-12	0	0	1.10949e-11
112	1.67763e-11	3.8988e-12	0	0	1.13555e-11
113	1.72035e-11	4.01177e-12	0	0	1.16224e-11
114	1.76416e-11	4.1286e-12	0	0	1.1896e-11
115	1.80906e-11	4.24948e-12	0	0	1.21763e-11
116	1.85511e-11	4.3746e-12	0	0	1.24636e-11
117	1.90231e-11	4.50419e-12	0	0	1.27581e-11
118	1.95071e-11	4.63851e-12	0	0	1.306e-11
119	2.00033e-11	4.77785e-12	0	0	1.33696e-11
120	2.05119e-11	4.92257e-12	0	0	1.3687e-11
121	2.10333e-11	5.0731e-12	0	0	1.40127e-11
122	2.15677e-11	5.23001e-12	0	0	1.43467e-11
123	2.21154e-11	5.39412e-12	0	0	1.46895e-11
124	2.26811e-11	5.57159e-12	0	0	1.50447e-11
125	2.35152e-11	6.04225e-12	0	0	1.55881e-11
126	3.36819e-11	1.68987e-11	0	0	2.26822e-11
127	2.6131e-10	2.39404e-10	0	2.19933e-10	1.69449e-10
128	3.87168e-09	3.76859e-09	0	3.75735e-09	2.495e-09
129	4.12747e-08	4.03341e-08	0	4.04098e-08	2.65875e-08
130	2.91779e-07	2.85232e-07	0	2.85891e-07	1.87946e-07
131	1.36102e-06	1.33054e-06	0	1.33369e-06	8.76677e-07
132	4.18727e-06	4.09354e-06	0	4.10326e-06	2.69716e-06
133	8.49644e-06	8.30627e-06	0	8.32601e-06	5.47284e-06
134	1.13706e-05	1.11161e-05	0	1.11425e-05	7.32414e-06
135	1.00365e-05	9.81184e-06	0	9.83517e-06	6.46482e-06
136	5.84441e-06	5.71359e-06	0	5.72718e-06	3.76458e-06
137	2.24955e-06	2.19919e-06	0	2.20443e-06	1.44901e-06
138	5.84133e-07	5.71038e-07	0	5.72421e-07	3.76258e-07
139	1.31239e-07	1.28279e-07	0	1.28629e-07	8.45338e-08
140	8.70112e-08	8.50395e-08	0	8.53174e-08	5.60441e-08
141	1.52052e-07	1.48623e-07	0	1.49094e-07	9.79374e-08
142	2.80902e-07	2.74588e-07	0	2.75417e-07	1.80932e-07
143	4.89843e-07	4.78849e-07	0	4.80245e-07	3.15514e-07
144	8.02561e-07	7.84565e-07	0	7.868e-07	5.16942e-07
145	1.23527e-06	1.20758e-06	0	1.21098e-06	7.95658e-07
146	1.78609e-06	1.74608e-06	0	1.75096e-06	1.15045e-06
147	2.42608e-06	2.37173e-06	0	2.37837e-06	1.56268e-06
148	3.09572e-06	3.02637e-06	0	3.03495e-06	1.994e-06
149	3.71087e-06	3.62774e-06	0	3.63825e-06	2.39022e-06
150	4.17874e-06	4.08512e-06	0	4.09739e-06	2.69157e-06
151	4.4205e-06	4.32144e-06	0	4.33515e-06	2.84726e-06
152	4.3929e-06	4.29443e-06	0	4.30923e-06	2.82944e-06
153	4.10095e-06	4.00897e-06	0	4.02461e-06	2.64132e-06
154	3.59641e-06	3.51566e-06	0	3.5321e-06	2.31625e-06
155	2.96277e-06	2.89613e-06	0	2.91366e-06	1.90801e-06
156	2.29277e-06	2.24104e-06	0	2.2603e-06	1.47632e-06
157	1.66661e-06	1.62877e-06	0	1.6508e-06	1.07282e-06
158	1.13779e-06	1.11164e-06	0	1.13782e-06	7.31992e-07
159	7.29326e-07	7.12129e-07	0	7.44178e-07	4.68628e-07
160	4.38635e-07	4.27733e-07	0	4.67694e-07	2.81063e-07
161	2.4706e-07	2.4027e-07	0	2.90497e-07	1.57274e-07
162	1.29643e-07	1.25579e-07	0	1.88679e-07	8.12116e-08
163	6.23374e-08	6.09466e-08	0	1.39477e-07	3.75075e-08
164	2.57481e-08	2.97139e-08	0	1.25226e-07	1.40498e-08
165	5.90857e-09	2.42096e-08	0	1.34785e-07	2.86584e-09
166	0	4.27434e-08	0	1.62082e-07	0
167	0	1.07589e-07	0	2.09912e-07	0
168	0	2.6281e-07	0	2.87794e-07	5.91017e-09
169	0	5.74033e-07	0	4.10979e-07	3.01397e-08
170	0	1.1292e-06	0	6.00963e-07	7.67214e-08
171	0	2.01715e-06	0	8.79702e-07	1.53646e-07
172	0	3.28692e-06	0	1.2602e-06	2.65288e-07
173	0	4.89656e-06	0	1.7346e-06	4.0752e-07
174	0	6.67606e-06	0	2.26554e-06	5.64204e-07
175	0	8.33482e-06	0	2.78791e-06	7.0788e-07
176	0	9.52987e-06	0	3.22456e-06	8.06168e-07
177	0	9.97801e-06	0	3.51228e-06	8.32288e-07
178	0	9.56288e-06	0	3.62647e-06	7.75117e-07
179	0	8.38259e-06	0	3.59222e-06	6.43658e-07
180	0	6.71317e-06	0	3.4757e-06	4.63616e-07
181	0	4.91077e-06	0	3.36154e-06	2.68223e-07
182	0	3.30787e-06	0	3.32873e-06	8.85068e-08
183	0	2.15278e-06	0	3.43456e-06	0
184	0	1.61011e-06	0	3.71927e-06	0
185	0	1.78626e-06	0	4.21223e-06	0
186	0	2.72799e-06	0	4.92504e-06	0
187	0	4.37393e-06	0	5.84333e-06	0
188	0	6.47444e-06	0	6.90272e-06	1.39587e-07
189	0	8.57257e-06	0	7.99965e-06	2.83536e-07
190	0	1.00917e-05	0	8.999e-06	3.69996e-07
191	0	1.05472e-05	0	9.78583e-06	3.53718e-07
192	0	9.76298e-06	0	1.03158e-05	2.1849e-07
193	0	7.95389e-06	0	1.06338e-05	0
194	0	5.6103e-06	0	1.08385e-05	0
195	0	3.28252e-06	0	1.10615e-05	0
196	0	1.35828e-06	0	1.13872e-05	0
197	0	0	0	1.18335e-05	0
198	0	0	0	1.18453e-05	0
199	0	0	0	1.21605e-05	0
200	0	0	0	1.26449e-05	0
201	0	0	0	1.3198e-05	0
202	0	0	0	1.37579e-05	0
203	0	0	0	1.42906e-05	0
204	0	0	0	1.47783e-05	0
205	0	0	0	1.52105e-05	0
206	0	0	0	1.55807e-05	0
207	0	0	0	1.58841e-05	0
208	0	0	0	1.61179e-05	0
209	0	0	0	1.62805e-05	0
210	0	0	0	1.63728e-05	0
211	0	0	0	1.63974e-05	0
212	0	0	0	1.63594e-05	0
213	0	0	0	1.62664e-05	0
214	0	0	0	1.61285e-05	0
215	0	0	0	1.59576e-05	0
216	0	0	0	1.57675e-05	0
217	0	0	0	1.55725e-05	0
218	0	0	0	1.53866e-05	0
219	0	0	0	1.52216e-05	0
220	0	0	0	1.50861e-05	0
221	3.20612e-07	0	0	1.4722e-05	0
222	6.03594e-07	2.71676e-07	0	1.42455e-05	0
223	8.93514e-07	5.90577e-07	0	1.37495e-05	8.75397e-08
224	1.18591e-06	9.19598e-07	0	1.32429e-05	3.10788e-07
225	1.47186e-06	1.24627e-06	0	1.27277e-05	5.30718e-07
226	1.73759e-06	1.55739e-06	0	1.21994e-05	7.38198e-07
227	1.96912e-06	1.8396e-06	0	1.16539e-05	9.23972e-07
228	2.15357e-06	2.08063e-06	0	1.10881e-05	1.07948e-06
229	2.28042e-06	2.27052e-06	0	1.0502e-05	1.1977e-06
230	2.34263e-06	2.40268e-06	0	9.90006e-06	1.27376e-06
231	2.33733e-06	2.47452e-06	0	9.29262e-06	1.30549e-06
232	2.26606e-06	2.4877e-06	0	8.69657e-06	1.29344e-06
233	2.13446e-06	2.44775e-06	0	8.136e-06	1.24075e-06
234	1.95155e-06	2.36335e-06	0	7.64199e-06	1.15268e-06
235	1.72859e-06	2.24517e-06	0	7.25207e-06	1.03584e-06
236	1.47779e-06	2.10467e-06	0	7.00893e-06	8.97534e-07
237	1.21111e-06	1.95281e-06	0	6.95874e-06	7.45058e-07
238	9.39352e-07	1.79906e-06	0	7.14885e-06	5.85375e-07
239	6.71976e-07	1.6503e-06	0	7.62493e-06	4.25558e-07
240	4.18956e-07	1.50898e-06	0	8.428e-06	2.75278e-07
241	1.97819e-07	1.36763e-06	0	9.59208e-06	1.54927e-07
242	5.37761e-08	1.193e-06	0	1.11449e-05	1.17996e-07
243	1.07229e-07	8.87568e-07	0	1.31157e-05	3.03442e-07
244	6.441e-07	2.15118e-07	0	1.55544e-05	1.03499e-06
245	1.89384e-06	0	0	1.80099e-05	2.98731e-06
246	4.6539e-06	0	0	2.04223e-05	7.22159e-06
247	9.8761e-06	0	0	2.26762e-05	1.50322e-05
248	1.81621e-05	0	0	2.45799e-05	2.7294e-05
249	2.9095e-05	0	0	2.60507e-05	4.34097e-05
250	4.07033e-05	0	0	2.71884e-05	6.05357e-05
251	4.97826e-05	0	0	2.82469e-05	7.40442e-05
252	5.32845e-05	0	0	2.94763e-05	7.95267e-05
253	5.00173e-05	0	0	3.09268e-05	7.52468e-05
254	4.13838e-05	0	0	3.23682e-05	6.32043e-05
255	3.05444e-05	0	0	3.33976e-05	4.79286e-05
256	2.06855e-05	0	0	3.36527e-05	3.39813e-05
257	1.36772e-05	0	0	3.29741e-05	2.40218e-05
258	9.39641e-06	1.61833e-06	0	3.07455e-05	1.84904e-05
259	7.04413e-06	5.34009e-06	0	2.69817e-05	1.63916e-05
260	6.69571e-06	7.44231e-06	0	2.35321e-05	1.62832e-05
261	7.42979e-06	8.68091e-06	0	2.03386e-05	1.71064e-05
262	8.70757e-06	9.50184e-06	0	1.74399e-05	1.82299e-05
263	1.02871e-05	1.01179e-05	0	1.49359e-05	1.93564e-05
264	1.21002e-05	1.06147e-05	0	1.29435e-05	2.03884e-05
265	1.41657e-05	1.1022e-05	0	1.15637e-05	2.13345e-05
266	1.65462e-05	1.13432e-05	0	1.08629e-05	2.22644e-05
267	1.93326e-05	1.15565e-05	0	1.08648e-05	2.32956e-05
268	2.26452e-05	1.15986e-05	0	1.15503e-05	2.45995e-05
269	2.65896e-05	1.1296e-05	1.24502e-06	1.24243e-05	2.62968e-05
270	3.13564e-05	1.05073e-05	2.98936e-06	1.36616e-05	2.8727e-05
271	3.70611e-05	9.08886e-06	4.83269e-06	1.52798e-05	3.2156e-05
272	4.36063e-05	7.02287e-06	6.7666e-06	1.71064e-05	3.66163e-05
273	5.05481e-05	4.59705e-06	8.6841e-06	1.89338e-05	4.17719e-05
274	5.70338e-05	2.49904e-06	1.03478e-05	2.05326e-05	4.6836e-05
275	6.19381e-05	1.73327e-06	1.14172e-05	2.16904e-05	5.07028e-05
276	6.42135e-05	3.32385e-06	1.15467e-05	2.2271e-05	5.23102e-05
277	6.33202e-05	7.90282e-06	1.05218e-05	2.22694e-05	5.10871e-05
278	5.94997e-05	1.5385e-05	8.36494e-06	2.18247e-05	4.72329e-05
279	5.37166e-05	2.49099e-05	5.35343e-06	2.11703e-05	4.1646e-05
280	4.72894e-05	3.50895e-05	1.93801e-06	2.05403e-05	3.55347e-05
281	4.1364e-05	4.43814e-05	0	1.95863e-05	2.98201e-05
282	3.66832e-05	5.16263e-05	0	1.82987e-05	2.50881e-05
283	3.35565e-05	5.63515e-05	0	1.73533e-05	2.16689e-05
284	3.18533e-05	5.86485e-05	0	1.66487e-05	1.9453e-05
285	3.13072e-05	5.91376e-05	0	1.60779e-05	1.83014e-05
286	3.16945e-05	5.87424e-05	0	1.55951e-05	1.81745e-05
287	3.29053e-05	5.84232e-05	0	1.52437e-05	1.91292e-05
288	3.49244e-05	5.89324e-05	0	1.51517e-05	2.12428e-05
289	3.77683e-05	6.06509e-05	0	1.55076e-05	2.45341e-05
290	4.14217e-05	6.35483e-05	0	1.65246e-05	2.89212e-05
291	4.57972e-05	6.72765e-05	0	1.83989e-05	3.42162e-05
292	5.07348e-05	7.13481e-05	0	2.12694e-05	4.01489e-05
293	5.60456e-05	7.53096e-05	0	2.51854e-05	4.64248e-05
294	6.16066e-05	7.88233e-05	0	3.00896e-05	5.28396e-05
295	6.75046e-05	8.16368e-05	0	3.58111e-05	5.94597e-05
296	7.41793e-05	8.34937e-05	0	4.20685e-05	6.68082e-05
297	8.24139e-05	8.40795e-05	0	4.85196e-05	7.58504e-05
298	9.30044e-05	8.30807e-05	0	5.48849e-05	8.75573e-05
299	0.000106208	8.04322e-05	0	6.10111e-05	0.000102211
300	0.00012136	7.66902e-05	0	6.6701e-05	0.000118981
301	0.000136634	7.30861e-05	0	7.1739e-05	0.000135598
302	0.000148833	7.08718e-05	0	7.65394e-05	0.000147846
303	0.000154742	7.07105e-05	0	8.19562e-05	0.000151224
304	0.000154224	7.2901e-05	0	8.74525e-05	0.00014531
305	0.00015078	7.74588e-05	0	9.08076e-05	0.000134604
306	0.00014826	8.36251e-05	0	9.04139e-05	0.00012395
307	0.000148469	9.00399e-05	0	8.64697e-05	0.000115446
308	0.000151639	9.56257e-05	0	7.99368e-05	0.000109545
309	0.000157759	0.000100139	0	7.13131e-05	0.000107105
310	0.000165994	0.00010359	0	6.14696e-05	0.000108257
311	0.00017217	0.000104916	0	5.42336e-05	0.000108168
312	0.000172764	0.000103401	0	5.29886e-05	0.000102591
313	0.000171363	0.000101163	0	5.48933e-05	9.72905e-05
314	0.000172786	0.000100753	0	5.60206e-05	9.91428e-05
315	0.000177269	0.000102767	0	5.64215e-05	0.000107565
316	0.000183391	0.000106962	0	5.74307e-05	0.000119246
317	0.000190321	0.000113134	0	5.97206e-05	0.000131958
318	0.000197657	0.000120996	0	6.37078e-05	0.000144729
319	0.000205277	0.000130088	0	6.98929e-05	0.000157857
320	0.000213151	0.000140021	0	7.85006e-05	0.000172293
321	0.000220542	0.000150941	0	8.86843e-05	0.000187428
322	0.000225414	0.00016367	0	9.81827e-05	0.000199471
323	0.00022522	0.000178545	1.03331e-05	0.000100649	0.0002031
324	0.000220393	0.00019558	2.14059e-05	9.79725e-05	0.000199394
325	0.000214041	0.000213139	3.12828e-05	9.10237e-05	0.000194466
326	0.000210334	0.000229268	3.93926e-05	8.07155e-05	0.000195136
327	0.000212467	0.000242878	4.35172e-05	6.79863e-05	0.000204409
328	0.000221587	0.000253755	4.09571e-05	5.38349e-05	0.000221038
329	0.000236167	0.000261847	3.10621e-05	3.97282e-05	0.000241402
330	0.000252187	0.000266898	1.65887e-05	2.74165e-05	0.000261237
331	0.000265148	0.000268776	2.1608e-06	1.80769e-05	0.000277172
332	0.000272128	0.000267467	0	8.79943e-06	0.000286764
333	0.00027317	0.000264078	0	3.16126e-06	0.000290499
334	0.000269256	0.000259322	0	1.12101e-06	0.000288856
335	0.000262358	0.000253964	0	9.15579e-07	0.000283895
336	0.000255276	0.00024907	0	0	0.00027929
337	0.000250018	0.000245258	0	0	0.000277529
338	0.000246623	0.000244042	0	0	0.000278198
339	0.000243882	0.000247418	0	0	0.000277925
340	0.000242155	0.000257552	0	0	0.000272712
341	0.000244467	0.000275259	0	0	0.000260722
342	0.000252067	0.000297295	0	0	0.000245171
343	0.000259443	0.000315162	0	0	0.000235107
344	0.000259677	0.000320237	0	0	0.000238894
345	0.000254267	0.000311124	0	0	0.000254836
346	0.000249662	0.000292571	0	0	0.000272626
347	0.000246963	0.000268367	0	0	0.000284126
348	0.000243599	0.000239187	0	0	0.00028936
349	0.000240958	0.00020545	0	0	0.00029335
350	0.000243164	0.000169119	0	0	0.000299379
351	0.000251065	0.000133272	0	0	0.000305603
352	0.000261432	9.97718e-05	0	7.76434e-06	0.000307308
353	0.000271317	7.18639e-05	0	1.78038e-05	0.000303302
354	0.000280001	5.13445e-05	0	2.43901e-05	0.000296054
355	0.000288382	3.74655e-05	0	2.7343e-05	0.00028886
356	0.000297909	2.81623e-05	0	2.75323e-05	0.000283864
357	0.000309855	2.0907e-05	0	2.65115e-05	0.000281561
358	0.000324878	1.3552e-05	0	2.57904e-05	0.000281318
359	0.00034262	4.72113e-06	2.64112e-06	2.53382e-05	0.000281571
360	0.000360294	0	8.57436e-06	2.24463e-05	0.000280681
361	0.000376324	0	1.39292e-05	1.76448e-05	0.000277327
362	0.000390633	0	1.79952e-05	1.21447e-05	0.000270425
363	0.000402683	0	1.96659e-05	5.2308e-06	0.000260198
364	0.000412871	0	1.68876e-05	0	0.00024815
365	0.000422589	0	8.15133e-06	0	0.000236837
366	0.000433308	0	0	0	0.000227873
367	0.000444415	0	0	0	0.000218927
368	0.000454984	0	0	0	0.000206566
369	0.000464779	0	0	0	0.000188917
370	0.000476161	0	0	0	0.000169816
371	0.000489993	0	0	0	0.000152792
372	0.000502825	0	0	0	0.000135539
373	0.000508016	1.67052e-05	0	0	0.000116811
374	0.000514377	3.39349e-05	0	0	0.000102234
375	0.000525003	5.02197e-05	0	0	9.56279e-05
376	0.000536245	6.49437e-05	0	0	9.37915e-05
377	0.000541676	7.67951e-05	0	0	9.07349e-05
378	0.000538619	8.35452e-05	0	2.57962e-06	8.31981e-05
379	0.000531086	8.291e-05	0	1.09678e-05	7.29177e-05
380	0.000526245	7.53042e-05	0	1.87222e-05	6.49e-05
381	0.000528428	6.23499e-05	0	2.25184e-05	6.24443e-05
382	0.000537435	4.64081e-05	0	2.15119e-05	6.55587e-05
383	0.00055019	2.92062e-05	0	1.71071e-05	7.17545e-05
384	0.000563033	1.12229e-05	0	1.18171e-05	7.78006e-05
385	0.000571951	0	0	4.24378e-06	8.18277e-05
386	0.000576173	0	0	0	8.34893e-05
387	0.000581763	0	0	0	8.42048e-05
388	0.000591453	0	0	0	8.53157e-05
389	0.000606388	0	0	0	8.66901e-05
390	0.000626694	0	0	0	8.73429e-05
391	0.000651033	0	0	0	8.60395e-05
392	0.00067639	0	0	0	8.19386e-05
393	0.000700958	0	0	0	7.53782e-05
394	0.000726907	0	0	0	6.83548e-05
395	0.000758251	0	0	0	6.40325e-05
396	0.000797062	0	0	0	6.54993e-05
397	0.00084212	0	0	0	7.4665e-05
398	0.000889969	0	0	0	9.20594e-05
399	0.000937606	0	0	0	0.000117537
400	0.000984429	0	0	0	0.000150963
401	0.00103125	0	0	0	0.000192024
402	0.00107841	0	0	0	0.000239479
403	0.00112618	0	0	0	0.00029084
404	0.00117591	0	0	0	0.000342919
405	0.00122887	0	0	0	0.000392876
406	0.0012844	0	0	0	0.000439168
407	0.00134098	0	0	0	0.000481877
408	0.00139907	0	0	0	0.000522296
409	0.00146046	0	0	0	0.00056211
410	0.00152452	0	0	0	0.000602816
411	0.00158744	0	0	0	0.00064555
412	0.00164572	0	0	0	0.000690605
413	0.00169815	0	0	0	0.000735982
414	0.00174364	0	0	0	0.000776065
415	0.0017791	0	0	0	0.00080309
416	0.00179407	2.65329e-05	0	0	0.000811944
417	0.00178419	9.82816e-05	0	0	0.000804516
418	0.00176288	0.000182687	0	0	0.000787854
419	0.00173392	0.000276896	0	0	0.000767572
420	0.00169937	0.000379842	0	0	0.000745817
421	0.00166181	0.000490995	0	0	0.000723307
422	0.00162475	0.000606828	0	1.4154e-05	0.000700335
423	0.00159133	0.000724719	0	3.28401e-05	0.000678597
424	0.00156127	0.000834745	0	4.80292e-05	0.000655819
425	0.00153138	0.000922058	0	5.96448e-05	0.000625443
426	0.00149868	0.00098042	0	6.9241e-05	0.000583883
427	0.00146258	0.00101601	0	7.94599e-05	0.000535453
428	0.00142573	0.00103816	0	9.06888e-05	0.000488174
429	0.00139224	0.00105257	0	0.000100749	0.000446095
430	0.00136358	0.00106173	0	0.000108903	0.000407496
431	0.00133789	0.00106636	0	0.000116985	0.000369392
432	0.00131327	0.00106613	0	0.000126286	0.000331367
433	0.00128989	0.00105987	0	0.000135693	0.000295165
434	0.00126893	0.00104538	0	0.000143084	0.00026255
435	0.00125079	0.00102003	0	0.000147429	0.000233975
436	0.00123455	0.000982203	0	0.000149647	0.000208201
437	0.00121867	0.000932545	0	0.000151929	0.000182838
438	0.00120247	0.000873929	0	0.000155767	0.000156197
439	0.00118659	0.000810374	0	0.000159767	0.000129653
440	0.00117263	0.000745799	0	0.000159067	0.000108774
441	0.00116158	0.000682854	0	0.000148735	9.96332e-05
442	0.0011495	0.000620849	0	0.00013162	9.80598e-05
443	0.00113133	0.00055717	0	0.000116587	9.25924e-05
444	0.00111248	0.000492479	0	0.000105149	8.38247e-05
445	0.00110119	0.000428809	0	9.38301e-05	7.78263e-05
446	0.00109835	0.000366297	0	8.1779e-05	7.43419e-05
447	0.00110125	0.000304827	0	6.89435e-05	7.22519e-05
448	0.00110731	0.000245028	0	5.50629e-05	7.19784e-05
449	0.00111463	0.000187829	0	4.03119e-05	7.37719e-05
450	0.00112198	0.000134022	0	2.53175e-05	7.71547e-05
451	0.00112875	8.42172e-05	0	1.07121e-05	8.13769e-05
452	0.0011352	3.83822e-05	0	0	8.577e-05
453	0.00114134	0	0	0	8.98303e-05
454	0.00114054	0	0	0	9.41258e-05
455	0.00114416	0	0	0	9.84769e-05
456	0.00114868	0	0	0	0.000101898
457	0.00114826	0	0	0	0.000104182
458	0.00113915	0	0	0	0.000106781
459	0.0011232	0	0	0	0.000112159
460	0.00110572	0	0	0	0.000121464
461	0.00108942	0	0	0	0.000132244
462	0.00107171	0	0	0	0.000140097
463	0.00104852	0	0	0	0.000144288
464	0.00101893	0	0	0	0.000149685
465	0.000985294	0	0	0	0.000161554
466	0.000950111	2.98545e-06	0	0	0.000180765
467	0.000917498	5.42981e-06	0	0	0.000204925
468	0.000888501	1.12292e-05	0	0	0.000231404
469	0.000863379	2.15224e-05	0	0	0.00025881
470	0.000841663	3.277e-05	0	0	0.000286714
471	0.000821917	3.90269e-05	0	0	0.000315136
472	0.000802275	3.52777e-05	0	0	0.000344402
473	0.000781412	2.03426e-05	0	0	0.000375171
474	0.000758471	0	0	0	0.000408221
475	0.000728355	0	0	0	0.000443802
476	0.000699569	0	0	0	0.000481772
477	0.000673041	0	0	0	0.000520773
478	0.000648101	0	0	0	0.000558962
479	0.000623463	0	0	0	0.000594974
480	0.000598355	0	1.3524e-07	0	0.000628785
481	0.000572983	0	1.72597e-06	0	0.000661793
482	0.000548474	0	3.27433e-06	0	0.00069653
483	0.000525534	0	5.50526e-06	0	0.000734691
484	0.000503966	0	9.05845e-06	0	0.000776547
485	0.000483078	0	1.43175e-05	0	0.000821623
486	0.000462456	0	1.96013e-05	4.45258e-06	0.000870079
487	0.000442727	0	2.51509e-05	1.16538e-05	0.000923621
488	0.00042455	0	3.14769e-05	1.91536e-05	0.000984325
489	0.000407795	0	3.84537e-05	2.70287e-05	0.00105338
490	0.000391785	0	4.61946e-05	3.56373e-05	0.00113096
491	0.00037583	0	5.50312e-05	4.53181e-05	0.00121666
492	0.000359525	0	6.54104e-05	5.62291e-05	0.0013101
493	0.000342723	0	7.77602e-05	6.83617e-05	0.00141142
494	0.000324203	4.72163e-06	9.18506e-05	7.97897e-05	0.0015218
495	0.000304401	1.2924e-05	0.000107964	9.07625e-05	0.00164318
496	0.000284273	2.17289e-05	0.000126436	0.000102055	0.00177822
497	0.000264151	3.08121e-05	0.000147247	0.000113396	0.00192994
498	0.000244322	3.98125e-05	0.00017039	0.000124511	0.00210126
499	0.000224941	4.8321e-05	0.00019591	0.000135201	0.00229461
500	0.000206012	5.58984e-05	0.000223889	0.000145386	0.00251185
501	0.000187431	6.21468e-05	0.000254407	0.000155101	0.00275428
502	0.000169061	6.68095e-05	0.000287476	0.000164448	0.00302278
503	0.000150784	6.98488e-05	0.000322988	0.000173553	0.00331793
504	0.0001325	7.14558e-05	0.000360689	0.000182539	0.00364015
505	0.000114099	7.1987e-05	0.000400174	0.000191536	0.00398985
506	9.54202e-05	7.1856e-05	0.000440892	0.000200683	0.00436778
507	7.62668e-05	7.14288e-05	0.000482149	0.000210109	0.00477537
508	5.64632e-05	7.09591e-05	0.000523113	0.000219884	0.00521522
509	3.59373e-05	7.05743e-05	0.000562819	0.000229943	0.00569132
510	1.47671e-05	7.03007e-05	0.000600202	0.000240046	0.00620912
511	0	6.4175e-05	0.000631862	0.000249098	0.00677198
512	0	4.50934e-05	0.000654002	0.000255751	0.00738328
513	0	2.59184e-05	0.000670664	0.000260848	0.00805706
514	0	6.63536e-06	0.000681	0.000263774	0.00880012
515	0	0	0.000680886	0.000257213	0.00961691
516	0	0	0.000671051	0.000243825	0.0105125
517	0	0	0.000652346	0.000226833	0.0114893
518	0	0	0.000623894	0.000206306	0.0125448
519	0	0	0.000584948	0.000182649	0.0136707
520	0	0	0.000535162	0.000156492	0.0148523
521	0	0	0.000474834	0.000128479	0.0160697
522	0	0	0.000404991	9.90438e-05	0.0173008
523	0	0	0.000327206	6.82769e-05	0.0185247
524	0	0	0.000243238	3.59559e-05	0.0197252
525	0	0	0.000154726	1.73637e-06	0.0208909
526	0	0	4.90713e-05	0	0.022011
527	0	0	0	0	0.0230676
528	0	0	0	0	0.0240487
529	0	0	0	0	0.0249445
530	0	0	0	0	0.0257331
531	0	0	0	0	0.02639
532	0	0	0	0	0.0268856
533	0	0	0	0	0.0271771
534	0	0	0	0	0.0272006
535	0	0	0	0	0.0268718
536	0	0	0	0	0.0261075
537	0	0	0	0	0.0248739
538	0	0	0	0	0.0232428
539	0	0	0	0	0.0213975
540	0	0	0	0	0.0195525
541	3.78065e-05	0	0	0	0.0178193
542	9.14828e-05	0	0	0	0.0162436
543	0.000139458	0	0	0	0.0148125
544	0.000181709	0	0	0	0.013501
545	0.000217901	0	0	0	0.0123037
546	0.000247895	0	0	0	0.0112208
547	0.000272079	0	0	0	0.0102452
548	0.000291355	0	0	0	0.00936401
549	0.000306959	0	0	0	0.0085641
550	0.000320256	0	0	0	0.00783559
551	0.000332065	1.34524e-06	0	0	0.00717148
552	0.000339816	1.53583e-05	0	0	0.0065661
553	0.000347696	2.87465e-05	0	0	0.00601439
554	0.000355395	4.15398e-05	0	0	0.00551125
555	0.000362182	5.33873e-05	0	3.01353e-06	0.00505164
556	0.000367177	6.27478e-05	0	1.90077e-05	0.00463061
557	0.000370557	7.19997e-05	0	3.37159e-05	0.00424599
558	0.000372849	8.10375e-05	0	4.67775e-05	0.00389564
559	0.000375248	8.97327e-05	0	5.75037e-05	0.0035783
560	0.000378939	9.81672e-05	0	6.52461e-05	0.00329272
561	0.000384016	0.000106953	0	6.99971e-05	0.00303619
562	0.000389105	0.000117192	0	7.25971e-05	0.00280415
563	0.000392581	0.000129681	0	7.40596e-05	0.00259213
564	0.000394265	0.000143831	0	7.46681e-05	0.00239819
565	0.000395506	0.000157389	0	7.40107e-05	0.00222301
566	0.000397636	0.000167334	0	7.187e-05	0.00206745
567	0.000400834	0.000171287	0	6.8745e-05	0.00193065
568	0.000404429	0.000168587	0	6.54729e-05	0.00181036
569	0.000407776	0.000160555	0	6.25901e-05	0.00170405
570	0.000410741	0.000149839	0	6.00908e-05	0.00160974
571	0.00041371	0.00013922	0	5.75943e-05	0.00152614
572	0.000417374	0.000130599	0	5.46167e-05	0.00145252
573	0.000422518	0.00012467	0	5.07481e-05	0.00138848
574	0.000429822	0.000121195	0	4.57237e-05	0.0013337
575	0.000439724	0.000119451	0	3.94505e-05	0.00128769
576	0.000452321	0.000118576	0	3.20306e-05	0.00124969
577	0.000467354	0.000117749	0	2.37633e-05	0.00121866
578	0.000484276	0.000116283	0	1.50951e-05	0.00119334
579	0.000502411	0.000113688	0	6.50831e-06	0.00117245
580	0.000521101	0.000109454	0	0	0.00115471
581	0.00053979	0.000102883	0	0	0.00113889
582	0.000558356	9.5291e-05	0	0	0.00112477
583	0.000576538	8.70163e-05	0	0	0.00111179
584	0.000593985	7.84235e-05	0	0	0.00109942
585	0.00061025	6.98305e-05	0	0	0.00108716
586	0.000624918	6.1462e-05	0	0	0.00107459
587	0.00063779	5.34406e-05	0	0	0.00106147
588	0.000648995	4.58057e-05	0	0	0.00104785
589	0.000658933	3.85486e-05	0	0	0.00103397
590	0.000668053	3.16485e-05	0	0	0.00102017
591	0.000676595	2.50977e-05	0	0	0.00100675
592	0.000684425	1.89155e-05	0	0	0.000993837
593	0.000691089	1.31506e-05	0	0	0.000981399
594	0.00069605	7.87628e-06	0	0	0.000969377
595	0.000699011	3.18038e-06	0	0	0.000957826
596	0.000699874	0	0	0	0.000947008
597	0.000698775	0	0	0	0.00093737
598	0.00069755	0	0	0	0.000929487
599	0.000697069	0	0	0	0.0009238
600	0.000697967	0	0	0	0.000920526
601	0.00070055	0	0	0	0.000919582
602	0.000704838	0	0	0	0.000920608
603	0.000710668	0	0	0	0.000923034
604	0.000717791	0	0	0	0.000926188
605	0.000725936	0	0	0	0.000929417
606	0.000734827	0	0	0	0.000932206
607	0.000744175	0	0	0	0.000934262
608	0.00075368	0	0	0	0.00093555
609	0.000763075	0	0	0	0.000936271
610	0.000772191	0	0	0	0.000936756
611	0.000780977	0	0	0	0.000937248
612	0.000789339	0	0	0	0.000937562
613	0.00079675	0	0	0	0.000936721
614	0.000801851	0	0	0	0.000932859
615	0.000802489	0	0	0	0.000923756
616	0.000796493	0	0	0	0.000907965
617	0.000782912	0	0	0	0.000885877
618	0.000762849	0	0	0	0.000859859
619	0.000739228	0	0	0	0.000833201
620	0.000715573	0	0	0	0.000808629
621	0.000693772	2.87256e-06	0	0	0.000787381
622	0.000676824	2.47412e-06	0	0	0.000769381
623	0.000663913	0	0	0	0.00075357
624	0.00065202	0	0	0	0.000738338
625	0.000639687	0	0	0	0.000721938
626	0.000625011	0	0	0	0.000702942
627	0.000607114	0	0	0	0.000680962
628	0.000586414	0	0	0	0.000656928
629	0.000564272	0	0	0	0.000632608
630	0.000542298	0	0	0	0.000609708
631	0.000521755	0	0	0	0.000589199
632	0.000503322	0	0	0	0.000571172
633	0.000487159	0	0	0	0.000555114
634	0.000473111	0	0	0	0.000540331
635	0.000460884	0	0	0	0.000526298
636	0.000450132	0	0	0	0.00051281
637	0.000440439	0	0	0	0.000499905
638	0.000431293	0	0	0	0.000487651
639	0.000422126	0	0	0	0.000475976
640	0.000412447	0	0	0	0.000464645
641	0.000400357	5.44499e-06	0	0	0.000453306
642	0.000387415	1.10817e-05	0	0	0.000441779
643	0.000373867	1.6763e-05	0	0	0.000429953
644	0.000360017	2.24176e-05	0	0	0.000417818
645	0.000346135	2.79891e-05	0	0	0.000405416
646	0.000332417	3.34527e-05	0	0	0.000392811
647	0.000319	3.88396e-05	0	0	0.000380077
648	0.000306007	4.42575e-05	0	0	0.000367306
649	0.000293565	4.98858e-05	0	0	0.000354599
650	0.000281803	5.59214e-05	0	0	0.00034204
651	0.000270811	6.24679e-05	0	0	0.00032966
652	0.000260615	6.93991e-05	0	0	0.000317393
653	0.000251147	7.62785e-05	0	0	0.000305066
654	0.000242266	8.24197e-05	0	0	0.000292434
655	0.000233792	8.71092e-05	0	0	0.000279265
656	0.000225565	8.98966e-05	0	0	0.000265442
657	0.000217489	9.07889e-05	0	0	0.000251029
658	0.000209545	9.02279e-05	0	0	0.000236268
659	0.000201776	8.88698e-05	0	0	0.000221503
660	0.000194266	8.731e-05	0	0	0.00020709
661	0.000187105	8.59073e-05	0	0	0.000193318
662	0.00018038	8.47676e-05	0	0	0.000180383
663	0.000174149	8.38381e-05	0	0	0.000168372
664	0.000168409	8.30151e-05	0	0	0.000157246
665	0.000163057	8.2202e-05	0	0	0.000146818
666	0.000157878	8.13153e-05	0	0	0.000136769
667	0.000152617	8.02754e-05	0	0	0.000126758
668	0.000147087	7.90115e-05	0	0	0.000116598
669	0.00014128	7.74819e-05	0	0	0.000106392
670	0.000135374	7.56889e-05	0	0	9.65158e-05
671	0.000129639	7.36744e-05	0	0	8.74535e-05
672	0.00012431	7.15001e-05	0	0	7.95751e-05
673	0.000119505	6.9228e-05	0	0	7.30123e-05
674	0.000115223	6.69087e-05	0	0	6.76727e-05
675	0.000111405	6.45796e-05	0	0	6.33437e-05
676	0.000107979	6.22636e-05	0	0	5.98017e-05
677	0.000104894	5.99699e-05	0	0	5.68754e-05
678	0.000102122	5.76953e-05	0	0	5.44598e-05
679	9.9646e-05	5.54283e-05	0	0	5.2502e-05
680	9.7457e-05	5.31547e-05	0	0	5.09789e-05
681	9.55435e-05	5.08619e-05	0	0	4.98789e-05
682	9.38913e-05	4.85418e-05	0	0	4.91903e-05
683	9.24816e-05	4.61904e-05	0	0	4.88939e-05
684	9.129e-05	4.38068e-05	0	0	4.89608e-05
685	9.02873e-05	4.13917e-05	0	0	4.93528e-05
686	8.94415e-05	3.89481e-05	0	0	5.0025e-05
687	8.87227e-05	3.64848e-05	0	0	5.09309e-05
688	8.81114e-05	3.40232e-05	0	0	5.20307e-05
689	8.76101e-05	3.16076e-05	0	0	5.33031e-05
690	8.72588e-05	2.9314e-05	0	0	5.47586e-05
691	8.71488e-05	2.72522e-05	0	0	5.6451e-05
692	8.74262e-05	2.55493e-05	0	0	5.84773e-05
693	8.82711e-05	2.43095e-05	0	0	6.09573e-05
694	8.98438e-05	2.35543e-05	0	0	6.39851e-05
695	9.21994e-05	2.31688e-05	0	0	6.75622e-05
696	9.51988e-05	2.28897e-05	0	0	7.15367e-05
697	9.84606e-05	2.23641e-05	0	0	7.55823e-05
698	0.000101398	2.1268e-05	0	0	7.92452e-05
699	0.000103354	1.94348e-05	0	0	8.20541e-05
700	0.000103797	1.6928e-05	0	0	8.36573e-05
701	0.0001025	1.40164e-05	0	0	8.39289e-05
702	9.96129e-05	1.10699e-05	0	0	8.2999e-05
703	9.56079e-05	8.43193e-06	0	0	8.11967e-05
704	9.11105e-05	6.32926e-06	0	0	7.89361e-05
705	8.67082e-05	4.84791e-06	0	0	7.65966e-05
706	8.28102e-05	3.96217e-06	0	0	7.44422e-05
707	7.95994e-05	3.58523e-06	0	0	7.25981e-05
708	7.70685e-05	3.61284e-06	0	0	7.10749e-05
709	7.50979e-05	3.94804e-06	0	0	6.98164e-05
710	7.3533e-05	4.50902e-06	0	0	6.87471e-05
711	7.2236e-05	5.22788e-06	0	0	6.78045e-05
712	7.11083e-05	6.04719e-06	0	0	6.69544e-05
713	7.00915e-05	6.9175e-06	0	0	6.61935e-05
714	6.91592e-05	7.79651e-06	0	0	6.55432e-05
715	6.8306e-05	8.64934e-06	0	0	6.50416e-05
716	6.75381e-05	9.44908e-06	0	0	6.47331e-05
717	6.6867e-05	1.01773e-05	0	0	6.466e-05
718	6.62752e-05	1.07619e-05	6.17519e-07	0	6.47822e-05
719	6.57832e-05	1.1228e-05	1.58709e-06	0	6.51467e-05
720	6.54124e-05	1.16218e-05	2.51037e-06	0	6.57954e-05
721	6.51591e-05	1.19557e-05	3.38565e-06	0	6.67014e-05
722	6.50129e-05	1.22468e-05	4.21412e-06	0	6.78149e-05
723	6.49566e-05	1.25148e-05	4.99971e-06	0	6.90653e-05
724	6.49677e-05	1.27807e-05	5.74866e-06	0	7.03656e-05
725	6.50202e-05	1.30642e-05	6.46874e-06	0	7.16181e-05
726	6.50864e-05	1.33824e-05	7.1684e-06	0	7.27219e-05
727	6.51395e-05	1.3748e-05	7.85565e-06	0	7.35806e-05
728	6.51563e-05	1.41683e-05	8.53711e-06	0	7.41099e-05
729	6.51189e-05	1.46442e-05	9.21706e-06	0	7.42444e-05
730	6.50169e-05	1.51702e-05	9.89679e-06	0	7.39435e-05
731	6.48484e-05	1.57335e-05	1.05743e-05	0	7.31941e-05
732	6.46207e-05	1.63153e-05	1.12441e-05	0	7.20124e-05
733	6.43495e-05	1.68908e-05	1.1898e-05	0	7.04427e-05
734	6.40587e-05	1.74302e-05	1.25254e-05	0	6.85543e-05
735	6.37785e-05	1.78996e-05	1.31145e-05	0	6.64369e-05
736	6.35437e-05	1.82622e-05	1.3653e-05	0	6.41945e-05
737	6.33915e-05	1.84796e-05	1.41294e-05	0	6.19391e-05
738	6.33594e-05	1.85132e-05	1.45334e-05	0	5.97839e-05
739	6.34826e-05	1.8326e-05	1.48565e-05	0	5.78374e-05
740	6.37923e-05	1.78845e-05	1.5092e-05	0	5.61972e-05
741	6.43136e-05	1.71611e-05	1.52349e-05	0	5.49461e-05
742	6.50633e-05	1.61363e-05	1.52809e-05	0	5.41481e-05
743	6.60491e-05	1.4801e-05	1.52262e-05	0	5.3846e-05
744	6.72683e-05	1.31588e-05	1.5066e-05	0	5.40603e-05
745	6.87076e-05	1.12272e-05	1.47944e-05	0	5.4789e-05
746	7.03436e-05	9.03818e-06	1.44036e-05	0	5.60092e-05
747	7.21445e-05	6.63741e-06	1.38842e-05	0	5.76789e-05
748	7.40718e-05	4.08229e-06	1.32261e-05	0	5.97413e-05
749	7.60845e-05	1.43822e-06	1.24192e-05	0	6.21282e-05
750	7.78004e-05	0	1.11448e-05	0	6.47896e-05
751	7.91381e-05	0	9.35722e-06	0	6.7654e-05
752	8.04876e-05	0	7.43931e-06	0	7.06219e-05
753	8.18474e-05	0	5.41419e-06	0	7.36304e-05
754	8.32255e-05	0	3.3108e-06	0	7.6629e-05
755	8.46394e-05	0	1.16398e-06	0	7.95813e-05
756	8.60394e-05	0	0	0	8.23483e-05
757	8.74448e-05	0	0	0	8.4903e-05
758	8.89774e-05	0	0	0	8.73832e-05
759	9.06625e-05	0	0	0	8.97883e-05
760	9.25092e-05	0	0	0	9.21065e-05
761	9.45026e-05	0	0	0	9.43043e-05
762	9.65969e-05	0	0	0	9.63192e-05
763	9.87132e-05	0	0	0	9.80558e-05
764	0.000100742	0	0	0	9.93894e-05
765	0.000102554	0	0	0	0.000100179
766	0.000104014	0	0	0	0.000100287
767	0.000105001	0	0	0	9.96043e-05
768	0.000105427	0	0	0	9.80722e-05
769	0.000105252	0	0	0	9.57036e-05
770	0.000104494	0	0	0	9.25874e-05
771	0.000103222	0	0	0	8.88828e-05
772	0.00010155	0	0	0	8.48e-05
773	9.96172e-05	0	0	0	8.05729e-05
774	9.75677e-05	0	0	0	7.64289e-05
775	9.55362e-05	0	0	0	7.25632e-05
776	9.36345e-05	0	0	0	6.91204e-05
777	9.19458e-05	0	0	0	6.61876e-05
778	9.0523e-05	0	0	0	6.37962e-05
779	8.93891e-05	0	0	0	6.19318e-05
780	8.8537e-05	0	0	0	6.05476e-05
781	8.79286e-05	0	0	0	5.95782e-05
782	8.74946e-05	0	0	0	5.89516e-05
783	8.71382e-05	0	0	0	5.85975e-05
784	8.67469e-05	0	0	0	5.84521e-05
785	8.62112e-05	0	0	0	5.84589e-05
786	8.54471e-05	0	0	0	5.85682e-05
787	8.44149e-05	0	0	0	5.87364e-05
788	8.31279e-05	0	0	0	5.89259e-05
789	8.16474e-05	0	0	0	5.91061e-05
790	8.00651e-05	0	0	0	5.92546e-05
791	7.84807e-05	0	0	0	5.9358e-05
792	7.69807e-05	0	0	0	5.94106e-05
793	7.56258e-05	0	0	0	5.94119e-05
794	7.44474e-05	0	0	0	5.93628e-05
795	7.34517e-05	0	0	0	5.92623e-05
796	7.26285e-05	0	0	0	5.91066e-05
797	7.19592e-05	0	0	0	5.88881e-05
798	7.14245e-05	0	0	0	5.85983e-05
799	7.10077e-05	0	0	0	5.82288e-05
800	7.06969e-05	0	0	0	5.77747e-05
801	7.04855e-05	0	0	0	5.7235e-05
802	7.03215e-05	0	6.48642e-07	0	5.65374e-05
803	7.01582e-05	0	2.56946e-06	0	5.56173e-05
804	7.00786e-05	0	4.71706e-06	0	5.46105e-05
805	7.00914e-05	0	7.04074e-06	0	5.35384e-05
806	7.02078e-05	0	9.46191e-06	0	5.24275e-05
807	7.04409e-05	0	1.18756e-05	0	5.13078e-05
808	7.07431e-05	2.22288e-07	1.40994e-05	0	5.02161e-05
809	7.11083e-05	7.3832e-07	1.59771e-05	0	4.91871e-05
810	7.16324e-05	1.24462e-06	1.74476e-05	0	4.82472e-05
811	7.23211e-05	1.73998e-06	1.83711e-05	4.46361e-08	4.74239e-05
812	7.31757e-05	2.24684e-06	1.86963e-05	0	4.67462e-05
813	7.41868e-05	2.75143e-06	1.8323e-05	0	4.62262e-05
814	7.53385e-05	3.26275e-06	1.72599e-05	0	4.58751e-05
815	7.66065e-05	3.78231e-06	1.55525e-05	0	4.56948e-05
816	7.79608e-05	4.30952e-06	1.32945e-05	0	4.56808e-05
817	7.9369e-05	4.84103e-06	1.06188e-05	0	4.5825e-05
818	8.08009e-05	5.37011e-06	7.68404e-06	0	4.61183e-05
819	8.22323e-05	5.88601e-06	4.65901e-06	0	4.65544e-05
820	8.3649e-05	6.37334e-06	1.7083e-06	0	4.71321e-05
821	8.49996e-05	6.70889e-06	0	0	4.77369e-05
822	8.62739e-05	6.8327e-06	0	0	4.83392e-05
823	8.75666e-05	6.8967e-06	0	0	4.91624e-05
824	8.88917e-05	6.87509e-06	0	0	5.02254e-05
825	9.02567e-05	6.7394e-06	0	0	5.1537e-05
826	9.16573e-05	6.46275e-06	0	0	5.30918e-05
827	9.30754e-05	6.0248e-06	0	0	5.48667e-05
828	9.4479e-05	5.41678e-06	0	0	5.68193e-05
829	9.58246e-05	4.64579e-06	0	0	5.88883e-05
830	9.70622e-05	3.73732e-06	0	0	6.09962e-05
831	9.81401e-05	2.73532e-06	0	0	6.30535e-05
832	9.89665e-05	1.60497e-06	9.35265e-07	0	6.48556e-05
833	9.94791e-05	3.66694e-07	3.2898e-06	0	6.62526e-05
834	9.95107e-05	0	5.33665e-06	0	6.73545e-05
835	9.92169e-05	0	7.08081e-06	0	6.81004e-05
836	9.87251e-05	0	8.51177e-06	0	6.8454e-05
837	9.80705e-05	0	9.55443e-06	0	6.84119e-05
838	9.72961e-05	0	1.01673e-05	0	6.79982e-05
839	9.64516e-05	0	1.03434e-05	0	6.72622e-05
840	9.55921e-05	0	1.01073e-05	0	6.62741e-05
841	9.47751e-05	0	9.50904e-06	0	6.5118e-05
842	9.40573e-05	0	8.61619e-06	0	6.38822e-05
843	9.34911e-05	0	7.50592e-06	0	6.2651e-05
844	9.29467e-05	6.22594e-07	6.09944e-06	0	6.1508e-05
845	9.26145e-05	1.29733e-06	4.61653e-06	0	6.04955e-05
846	9.25487e-05	1.88744e-06	3.15848e-06	0	5.96428e-05
847	9.27531e-05	2.37806e-06	1.78452e-06	0	5.89602e-05
848	9.32123e-05	2.7633e-06	5.39292e-07	0	5.84394e-05
849	9.38695e-05	2.98686e-06	0	0	5.79931e-05
850	9.46903e-05	3.06719e-06	0	0	5.76102e-05
851	9.56512e-05	3.05802e-06	0	0	5.73173e-05
852	9.67041e-05	2.95621e-06	0	0	5.70767e-05
853	9.78068e-05	2.75762e-06	0	0	5.68542e-05
854	9.89284e-05	2.45973e-06	0	0	5.66209e-05
855	0.000100052	2.06471e-06	0	0	5.63554e-05
856	0.000101178	1.58203e-06	0	0	5.60441e-05
857	0.000102321	1.02993e-06	0	0	5.56807e-05
858	0.000103506	4.35536e-07	0	0	5.52653e-05
859	0.00010472	0	0	0	5.48008e-05
860	0.000105932	0	0	0	5.42922e-05
861	0.000107321	0	0	0	5.37529e-05
862	0.000108907	0	3.47729e-07	0	5.31507e-05
863	0.000110705	0	1.37959e-06	0	5.24533e-05
864	0.000112776	0	2.60392e-06	0	5.1725e-05
865	0.000115132	0	4.01902e-06	0	5.09712e-05
866	0.000117767	0	5.60842e-06	0	5.01994e-05
867	0.000120655	0	7.33918e-06	0	4.94208e-05
868	0.000123752	0	9.16288e-06	0	4.86505e-05
869	0.000126994	0	1.10194e-05	0	4.79084e-05
870	0.000130302	0	1.28432e-05	0	4.72172e-05
871	0.000133592	0	1.45704e-05	0	4.66001e-05
872	0.00013678	0	1.61464e-05	0	4.60775e-05
873	0.000139795	0	1.75312e-05	0	4.56629e-05
874	0.00014259	0	1.87024e-05	0	4.53602e-05
875	0.00014515	0	1.96542e-05	0	4.51615e-05
876	0.000147495	0	2.03946e-05	0	4.50475e-05
877	0.000149677	0	2.09405e-05	0	4.49897e-05
878	0.000151775	0	2.13118e-05	0	4.4954e-05
879	0.000153881	0	2.15274e-05	0	4.49059e-05
880	0.000156092	0	2.16022e-05	0	4.48151e-05
881	0.000158495	0	2.15471e-05	0	4.46599e-05
882	0.000161162	0	2.13695e-05	0	4.44293e-05
883	0.000164143	0	2.10757e-05	0	4.41236e-05
884	0.000167468	0	2.06728e-05	0	4.37537e-05
885	0.000171151	0	2.01708e-05	0	4.33388e-05
886	0.000175194	0	1.95829e-05	0	4.29033e-05
887	0.000179593	0	1.89251e-05	0	4.2474e-05
888	0.000184341	0	1.82157e-05	0	4.20776e-05
889	0.000189429	0	1.74733e-05	0	4.17387e-05
890	0.000194847	0	1.67158e-05	0	4.14787e-05
891	0.000200579	0	1.59586e-05	0	4.13142e-05
892	0.000206604	0	1.52143e-05	0	4.12568e-05
893	0.000212894	0	1.4492e-05	0	4.13112e-05
894	0.000219412	0	1.37977e-05	0	4.14748e-05
895	0.000226115	0	1.31347e-05	0	4.17361e-05
896	0.000232955	0	1.25048e-05	0	4.20745e-05
897	0.000239884	0	1.19089e-05	0	4.24599e-05
898	0.000246854	0	1.13483e-05	0	4.28539e-05
899	0.000253822	0	1.08255e-05	0	4.32122e-05
900	0.000260747	0	1.03452e-05	0	4.34877e-05
901	0.000267594	0	9.91379e-06	0	4.36348e-05
902	0.000274335	0	9.54034e-06	0	4.36133e-05
903	0.000280941	0	9.23545e-06	0	4.3392e-05
904	0.000287389	0	9.0108e-06	0	4.29521e-05
905	0.000293662	0	8.87818e-06	0	4.2288e-05
906	0.000299746	0	8.84836e-06	0	4.14071e-05
907	0.000305636	0	8.92998e-06	0	4.0328e-05
908	0.000311338	0	9.12847e-06	0	3.9078e-05
909	0.00031687	0	9.44519e-06	0	3.76888e-05
910	0.000322264	0	9.87677e-06	0	3.61935e-05
911	0.000327566	0	1.04149e-05	0	3.46228e-05
912	0.000332833	0	1.10464e-05	0	3.30029e-05
913	0.000338129	0	1.17539e-05	0	3.13537e-05
914	0.000343524	0	1.25169e-05	0	2.96889e-05
915	0.000349079	0	1.33125e-05	0	2.80163e-05
916	0.000354851	0	1.4117e-05	0	2.63388e-05
917	0.000360883	0	1.49065e-05	0	2.46558e-05
918	0.000367207	0	1.56572e-05	0	2.29642e-05
919	0.000373844	0	1.6346e-05	0	2.12594e-05
920	0.000380812	0	1.69493e-05	0	1.95364e-05
921	0.000388127	0	1.74434e-05	0	1.77905e-05
922	0.00039581	0	1.7804e-05	0	1.60201e-05
923	0.000403891	0	1.8007e-05	0	1.42284e-05
924	0.000412407	0	1.80297e-05	0	1.24281e-05
925	0.000421401	0	1.78523e-05	0	1.06451e-05
926	0.00043092	0	1.74597e-05	0	8.92252e-06
927	0.000441012	0	1.68425e-05	0	7.3238e-06
928	0.000451727	0	1.59973e-05	0	5.93265e-06
929	0.000463112	0	1.49259e-05	0	4.85104e-06
930	0.000475208	0	1.36344e-05	0	4.19418e-06
931	0.000488037	0	1.21326e-05	0	4.08374e-06
932	0.000501582	0	1.0434e-05	0	4.63917e-06
933	0.000515763	0	8.55579e-06	0	5.96664e-06
934	0.000530428	0	6.51628e-06	0	8.14378e-06
935	0.000545358	0	4.32783e-06	0	1.11995e-05
936	0.000560308	0	1.98669e-06	0	1.50909e-05
937	0.000575003	0	0	0	1.96218e-05
938	0.000589129	0	0	0	2.43641e-05
939	0.000602704	0	0	0	2.9234e-05
940	0.000615632	0	0	0	3.38711e-05
941	0.000627841	0	0	0	3.79278e-05
942	0.000639271	0	0	0	4.11275e-05
943	0.000649894	0	0	0	4.3311e-05
944	0.000659743	0	0	0	4.44589e-05
945	0.000668933	0	0	0	4.46866e-05
946	0.000677663	0	0	0	4.42121e-05
947	0.00068619	0	0	0	4.33047e-05
948	0.000694784	0	0	0	4.22286e-05
949	0.000703681	0	0	0	4.11949e-05
950	0.000713036	0	0	0	4.03332e-05
951	0.000722106	2.67162e-06	0	0	3.96597e-05
952	0.000731714	5.07255e-06	0	0	3.91812e-05
953	0.00074177	7.02306e-06	0	0	3.88355e-05
954	0.00075208	8.53766e-06	0	0	3.85469e-05
955	0.000762449	9.64626e-06	0	0	3.82486e-05
956	0.000772728	1.03933e-05	0	0	3.78927e-05
957	0.000782845	1.08377e-05	0	0	3.74506e-05
958	0.000792821	1.10489e-05	0	0	3.69088e-05
959	0.000802753	1.10953e-05	0	0	3.62651e-05
960	0.000812789	1.1029e-05	0	0	3.55246e-05
961	0.000823098	1.08726e-05	0	0	3.46986e-05
962	0.000833839	1.06127e-05	0	0	3.38024e-05
963	0.000845148	1.02035e-05	0	0	3.28523e-05
964	0.000857131	9.57929e-06	0	0	3.18612e-05
965	0.000869866	8.67136e-06	0	0	3.08345e-05
966	0.000883413	7.42593e-06	0	0	2.97659e-05
967	0.000897815	5.8174e-06	0	0	2.86354e-05
968	0.000913107	3.85434e-06	0	0	2.74097e-05
969	0.000929309	1.57602e-06	0	0	2.60461e-05
970	0.000946133	0	0	0	2.44895e-05
971	0.000963299	0	0	0	2.26926e-05
972	0.000981209	0	0	0	2.06476e-05
973	0.000999751	0	0	0	1.83462e-05
974	0.00101879	0	0	0	1.57925e-05
975	0.00103822	0	0	0	1.29945e-05
976	0.00105798	0	0	0	9.95529e-06
977	0.00107807	0	0	0	6.66982e-06
978	0.00109856	0	0	0	3.1285e-06
979	0.00111951	0	0	0	0
980	0.0011409	0	0	0	0
981	0.00116282	0	0	0	0
982	0.00118523	0	0	0	0
983	0.00120808	0	0	0	0
984	0.00123128	0	0	0	0
985	0.00125476	0	0	0	0
986	0.00127849	0	0	0	0
987	0.00130242	0	0	0	0
988	0.00132653	0	0	0	0
989	0.00135079	0	0	0	0
990	0.00137515	0	0	0	0
991	0.00139953	0	0	0	0
992	0.00142386	0	0	0	0
993	0.00144807	0	0	0	0
994	0.00147213	0	0	0	0
995	0.00149605	0	0	0	0
996	0.00151991	0	0	0	0
997	0.0015438	0	0	0	0
998	0.00156788	0	0	0	0
999	0.00159228	0	0	0	0
1000	0.00161712	0	0	0	0
1001	0.0016425	0	0	0	0
1002	0.00166845	0	0	0	0
1003	0.00169499	0	0	0	0
1004	0.00172206	0	0	0	0
1005	0.00174961	0	0	0	0
1006	0.00177755	0	0	0	0
1007	0.00180578	0	0	0	0
1008	0.0018342	0	0	0	0
1009	0.00186271	0	0	0	0
1010	0.00189122	0	0	0	0
1011	0.00191966	0	0	0	0
1012	0.001948	0	0	0	0
1013	0.0019762	0	0	0	0
1014	0.00200427	0	0	0	0
1015	0.00203222	0	0	0	0
1016	0.00206008	0	0	0	0
1017	0.00208789	0	0	0	0
1018	0.00211566	0	0	0	0
1019	0.0021434	0	0	0	0
1020	0.00217109	0	0	0	0
1021	0.00219866	0	0	0	0
1022	0.002226	0	0	0	0
1023	0.00225295	0	0	0	0
1024	0.00227932	0	0	0	0
1025	0.0023049	0	0	0	0
1026	0.00232947	0	0	0	0
1027	0.00235286	0	0	0	0
1028	0.00237496	0	0	0	0
1029	0.00239572	0	0	0	0
1030	0.00241517	0	0	0	0
1031	0.00243345	0	0	0	0
1032	0.00245074	0	0	0	0
1033	0.00246726	0	0	0	0
1034	0.00248325	0	0	0	0
1035	0.00249895	0	0	0	0
1036	0.00251454	0	0	0	0
1037	0.00253011	0	0	0	0
1038	0.00254572	0	0	0	0
1039	0.00256135	0	0	0	0
1040	0.00257698	0	0	0	0
1041	0.00259257	0	0	0	0
1042	0.00260815	0	0	0	0
1043	0.00262372	0	0	0	0
1044	0.00263929	0	0	0	0
1045	0.00265481	0	0	0	0
1046	0.00267009	0	0	0	0
1047	0.00268489	0	0	0	0
1048	0.00269892	0	0	0	0
1049	0.00271195	0	0	0	0
1050	0.00272388	0	0	0	0
1051	0.0027348	0	0	0	0
1052	0.00274488	0	0	0	0
1053	0.00275438	0	0	0	0
1054	0.00276351	0	0	0	0
1055	0.00277236	0	0	0	0
1056	0.00278094	0	0	0	0
1057	0.00278917	0	0	0	0
1058	0.00279693	0	0	0	0
1059	0.00280407	0	0	0	0
1060	0.00281048	0	0	0	0
1061	0.00281607	0	0	0	0
1062	0.00282077	0	0	0	0
1063	0.00282453	0	0	0	0
1064	0.00282733	0	0	0	0
1065	0.00282919	0	0	0	0
1066	0.00283013	0	0	0	0
1067	0.00283023	0	0	0	0
1068	0.00282958	0	0	0	0
1069	0.00282829	0	0	0	0
1070	0.00282645	0	0	0	0
1071	0.00282416	0	0	0	0
1072	0.00282145	0	0	0	0
1073	0.00281818	0	0	2.5516e-06	0
1074	0.00281432	0	0	8.10444e-06	0
1075	0.00281009	0	0	1.42338e-05	0
1076	0.00280549	0	0	2.12128e-05	0
1077	0.00280046	0	0	2.91775e-05	0
1078	0.00279485	0	0	3.79547e-05	0
1079	0.00278838	0	0	4.69432e-05	0
1080	0.00278063	0	0	5.51444e-05	0
1081	0.00277112	0	0	6.13947e-05	0
1082	0.00275944	0	0	6.47445e-05	0
1083	0.00274539	0	0	6.48305e-05	0
1084	0.00272881	0	4.93916e-06	6.02121e-05	0
1085	0.00271009	0	1.35178e-05	5.24406e-05	0
1086	0.00268987	0	2.27544e-05	4.40094e-05	0
1087	0.00266864	0	3.18237e-05	3.64988e-05	0
1088	0.00264682	0	4.01769e-05	3.09659e-05	0
1089	0.00262464	0	4.76063e-05	2.78167e-05	0
1090	0.00260224	0	5.41832e-05	2.69193e-05	0
1091	0.00257972	0	6.01311e-05	2.78432e-05	0
1092	0.00255714	0	6.57056e-05	3.00957e-05	0
1093	0.0025346	0	7.11173e-05	3.32806e-05	0
1094	0.00251219	0	7.65044e-05	3.716e-05	0
1095	0.00248998	0	8.19372e-05	4.16463e-05	0
1096	0.00246802	0	8.74366e-05	4.67563e-05	0
1097	0.00244628	0	9.29929e-05	5.25575e-05	0
1098	0.00242473	0	9.85787e-05	5.91225e-05	0
1099	0.00240331	0	0.000104157	6.64978e-05	0
1100	0.00238199	0	0.000109683	7.46886e-05	0
1101	0.00236077	0	0.000115107	8.36551e-05	0
1102	0.00233969	0	0.000120377	9.33189e-05	0
1103	0.00231884	0	0.000125434	0.000103574	0
1104	0.00229834	0	0.000130223	0.000114296	0
1105	0.00227831	0	0.000134693	0.000125359	0
1106	0.00225888	0	0.000138803	0.000136636	0
1107	0.00224013	0	0.000142529	0.000148005	0
1108	0.00222214	0	0.000145864	0.000159352	0
1109	0.0022049	0	0.000148826	0.000170568	0
1110	0.00218842	0	0.00015145	0.00018155	0
1111	0.00217265	0	0.000153784	0.000192196	0
1112	0.00215756	0	0.000155884	0.00020241	0
1113	0.0021431	0	0.000157795	0.000212106	0
1114	0.00212927	0	0.000159552	0.000221219	0
1115	0.00211604	0	0.00016117	0.000229709	0
1116	0.00210337	0	0.000162638	0.000237576	0
1117	0.00209122	0	0.000163929	0.000244863	0
1118	0.00207949	0	0.000164996	0.000251656	0
1119	0.00206808	0	0.000165787	0.000258068	0
1120	0.0020566	9.90323e-07	0.000166134	0.000263838	0
1121	0.00204231	1.31874e-05	0.000164838	0.000265175	0
1122	0.0020278	2.65164e-05	0.00016298	0.000265973	0
1123	0.0020131	4.09367e-05	0.000160522	0.000266246	0
1124	0.00199838	5.62758e-05	0.00015745	0.000266002	0
1125	0.00198389	7.22573e-05	0.00015377	0.000265248	0
1126	0.00196991	8.85493e-05	0.000149505	0.000263991	0
1127	0.00195671	0.00010482	0.000144689	0.000262239	0
1128	0.00194452	0.000120782	0.000139366	0.000260004	0
1129	0.00193349	0.000136222	0.00013359	0.000257299	0
1130	0.00192367	0.000151001	0.00012742	0.000254135	0
1131	0.00191507	0.000165037	0.000120929	0.00025053	0
1132	0.00190764	0.000178274	0.000114193	0.000246512	0
1133	0.0019013	0.00019065	0.000107293	0.000242131	0
1134	0.00189592	0.000202073	0.000100313	0.000237465	0
1135	0.0018914	0.000212412	9.3335e-05	0.00023262	0
1136	0.00188762	0.000221514	8.64379e-05	0.000227719	0
1137	0.00188444	0.000229228	7.97021e-05	0.000222882	0
1138	0.00188177	0.000235447	7.32121e-05	0.000218207	0
1139	0.00187945	0.000240151	6.70622e-05	0.000213753	0
1140	0.00187731	0.000243421	6.13592e-05	0.000209532	0
1141	0.00187517	0.000245442	5.62209e-05	0.000205523	0
1142	0.00187274	0.000246471	5.17679e-05	0.000201696	0
1143	0.00186976	0.000246789	4.81081e-05	0.000198038	0
1144	0.00186596	0.000246644	4.53182e-05	0.000194566	0
1145	0.00186113	0.000246214	4.34263e-05	0.000191328	0
1146	0.00185518	0.000245587	4.24024e-05	0.000188379	0
1147	0.00184816	0.000244767	4.21599e-05	0.000185756	0
1148	0.00184026	0.000243692	4.2568e-05	0.000183456	0
1149	0.00183175	0.000242259	4.34732e-05	0.00018143	0
1150	0.00182289	0.000240346	4.47214e-05	0.000179592	0
1151	0.00181395	0.000237824	4.61759e-05	0.000177836	0
1152	0.00180508	0.000234572	4.77284e-05	0.000176053	0
1153	0.00179638	0.000230481	4.92996e-05	0.000174142	0
1154	0.00178787	0.000225461	5.08345e-05	0.000172016	0
1155	0.00177954	0.000219447	5.22934e-05	0.000169607	0
1156	0.00177136	0.000212398	5.36447e-05	0.000166864	0
1157	0.00176331	0.000204304	5.48583e-05	0.000163762	0
1158	0.0017554	0.000195188	5.59051e-05	0.000160305	0
1159	0.00174762	0.000185107	5.67583e-05	0.000156528	0
1160	0.00173998	0.000174165	5.73987e-05	0.000152502	0
1161	0.00173244	0.000162511	5.78208e-05	0.000148332	0
1162	0.00172496	0.000150342	5.80385e-05	0.000144153	0
1163	0.00171743	0.000137893	5.80867e-05	0.000140124	0
1164	0.00170974	0.000125416	5.80202e-05	0.000136412	0
1165	0.00170177	0.000113155	5.79072e-05	0.000133178	0
1166	0.00169342	0.000101317	5.78204e-05	0.000130556	0
1167	0.00168462	9.00536e-05	5.78273e-05	0.000128624	0
1168	0.00167535	7.94571e-05	5.79825e-05	0.000127388	0
1169	0.00166564	6.95692e-05	5.83236e-05	0.000126764	0
1170	0.00165553	6.0405e-05	5.88701e-05	0.000126571	0
1171	0.00164504	5.19798e-05	5.96263e-05	0.000126538	0
1172	0.0016342	4.4328e-05	6.05844e-05	0.000126326	0
1173	0.00162298	3.75106e-05	6.1729e-05	0.000125558	0
1174	0.00161132	3.16066e-05	6.30402e-05	0.000123873	0
1175	0.00159915	2.66946e-05	6.44966e-05	0.000120969	0
1176	0.00158642	2.28297e-05	6.60789e-05	0.000116651	0
1177	0.00157309	2.0024e-05	6.77725e-05	0.00011086	0
1178	0.00155914	1.82362e-05	6.95703e-05	0.00010369	0
1179	0.00154462	1.7372e-05	7.1475e-05	9.53772e-05	0
1180	0.00152957	1.72936e-05	7.34994e-05	8.62653e-05	0
1181	0.00151409	1.78372e-05	7.56655e-05	7.67639e-05	0
1182	0.00149827	1.88315e-05	7.80012e-05	6.72944e-05	0
1183	0.0014822	2.0115e-05	8.05372e-05	5.82418e-05	0
1184	0.00146599	2.15483e-05	8.33022e-05	4.9918e-05	0
1185	0.00144972	2.30209e-05	8.63196e-05	4.25408e-05	0
1186	0.00143346	2.44519e-05	8.96045e-05	3.62297e-05	0
1187	0.00141727	2.57863e-05	9.31622e-05	3.10158e-05	0
1188	0.0014012	2.69892e-05	9.69882e-05	2.68608e-05	0
1189	0.00138531	2.80396e-05	0.000101069	2.36794e-05	0
1190	0.00136964	2.89241e-05	0.000105382	2.13611e-05	0
1191	0.00135422	2.96337e-05	0.000109901	1.97873e-05	0
1192	0.00133913	3.01602e-05	0.000114592	1.88442e-05	0
1193	0.00132439	3.0495e-05	0.000119421	1.84301e-05	0
1194	0.00131007	3.06272e-05	0.000124349	1.84587e-05	0
1195	0.00129621	3.05424e-05	0.000129338	1.88597e-05	0
1196	0.00128286	3.02211e-05	0.000134346	1.95767e-05	0
1197	0.00127005	2.9636e-05	0.000139335	2.05632e-05	0
1198	0.00125782	2.8749e-05	0.000144264	2.1777e-05	0
1199	0.00124624	2.75055e-05	0.000149101	2.31721e-05	0
1200	0.00123537	2.58304e-05	0.000153822	2.46921e-05	0
1201	0.00122531	2.36303e-05	0.000158416	2.62646e-05	0
1202	0.00121618	2.08121e-05	0.000162878	2.78038e-05	0
1203	0.00120806	1.73283e-05	0.000167197	2.92235e-05	0
1204	0.00120093	1.32421e-05	0.000171327	3.04593e-05	0
1205	0.0011946	8.78858e-06	0.000175168	3.14924e-05	0
1206	0.00118871	4.38611e-06	0.000178557	3.23582e-05	0
1207	0.00118278	5.66756e-07	0.000181302	3.31306e-05	0
1208	0.00117579	0	0.000182996	3.30567e-05	0
1209	0.00116825	0	0.000183903	3.33106e-05	0
1210	0.00116029	0	0.000184139	3.40944e-05	0
1211	0.00115205	0	0.000183834	3.52556e-05	0
1212	0.00114357	5.43919e-07	0.000183094	3.63829e-05	0
1213	0.00113444	3.66051e-06	0.00018184	3.65411e-05	0
1214	0.0011252	7.21703e-06	0.000180418	3.64748e-05	0
1215	0.00111576	1.10416e-05	0.000178904	3.62741e-05	0
1216	0.00110599	1.49967e-05	0.000177331	3.60682e-05	0
1217	0.00109574	1.89481e-05	0.000175703	3.59932e-05	0
1218	0.00108495	2.2761e-05	0.000174005	3.61637e-05	0
1219	0.00107368	2.63233e-05	0.0001722	3.66543e-05	0
1220	0.00106203	2.95756e-05	0.000170229	3.7494e-05	0
1221	0.0010502	3.25312e-05	0.000168014	3.86689e-05	0
1222	0.0010384	3.52759e-05	0.000165466	4.01337e-05	0
1223	0.00102682	3.79491e-05	0.000162497	4.18272e-05	0
1224	0.00101563	4.07145e-05	0.000159037	4.36878e-05	0
1225	0.00100493	4.37301e-05	0.000155042	4.56656e-05	0
1226	0.000994768	4.71248e-05	0.000150503	4.77277e-05	0
1227	0.000985115	5.09842e-05	0.000145446	4.98565e-05	0
1228	0.000975904	5.5345e-05	0.000139925	5.20421e-05	0
1229	0.000967032	6.01961e-05	0.000134027	5.42717e-05	0
1230	0.000958376	6.54827e-05	0.000127856	5.65183e-05	0
1231	0.000949816	7.11116e-05	0.000121533	5.87323e-05	0
1232	0.00094124	7.69596e-05	0.000115187	6.08382e-05	0
1233	0.00093256	8.28833e-05	0.000108941	6.27347e-05	0
1234	0.000923732	8.8733e-05	0.000102895	6.43005e-05	0
1235	0.000914765	9.43697e-05	9.71067e-05	6.54024e-05	0
1236	0.00090574	9.9682e-05	9.15695e-05	6.59062e-05	0
1237	0.000896803	0.0001046	8.62096e-05	6.56921e-05	0
1238	0.000888128	0.000109102	8.09083e-05	6.46759e-05	0
1239	0.000879839	0.000113201	7.55626e-05	6.28359e-05	0
1240	0.000871904	0.000116933	7.01681e-05	6.02409e-05	0
1241	0.000864063	0.000120335	6.48869e-05	5.70637e-05	0
1242	0.000855834	0.000123429	6.00484e-05	5.35665e-05	0
1243	0.000846648	0.000126236	5.60558e-05	5.00488e-05	0
1244	0.000836066	0.000128791	5.32231e-05	4.6771e-05	0
1245	0.000823984	0.000131165	5.16206e-05	4.38852e-05	0
1246	0.000810713	0.000133474	5.10149e-05	4.14035e-05	0
1247	0.000796887	0.000135857	5.09415e-05	3.922e-05	0
1248	0.000783248	0.000138441	5.08709e-05	3.71725e-05	0
1249	0.000770416	0.000141316	5.03821e-05	3.51101e-05	0
1250	0.000758751	0.000144509	4.92644e-05	3.2939e-05	0
1251	0.000748342	0.000147994	4.7521e-05	3.0634e-05	0
1252	0.000739083	0.000151707	4.53011e-05	2.82228e-05	0
1253	0.000730788	0.000155559	4.28108e-05	2.57616e-05	0
1254	0.00072329	0.000159448	4.02409e-05	2.3314e-05	0
1255	0.000716503	0.000163246	3.77248e-05	2.09389e-05	0
1256	0.000710458	0.000166792	3.53233e-05	1.86869e-05	0
1257	0.000705313	0.000169877	3.30257e-05	1.65999e-05	0
1258	0.000701319	0.000172263	3.0768e-05	1.47102e-05	0
1259	0.000698722	0.000173746	2.84703e-05	1.30358e-05	0
1260	0.0006976	0.00017427	2.60957e-05	1.15698e-05	0
1261	0.000697688	0.000174064	2.37136e-05	1.02679e-05	0
1262	0.000698281	0.000173709	2.15323e-05	9.03915e-06	0
1263	0.000698343	0.000174069	1.98664e-05	7.75041e-06	0
1264	0.000696811	0.000176054	1.9032e-05	6.25539e-06	0
1265	0.000692993	0.000180283	1.92116e-05	4.44846e-06	0
1266	0.000686837	0.000186807	2.03595e-05	2.33239e-06	0
1267	0.000678931	0.000195023	2.22027e-05	7.2837e-08	0
1268	0.000670205	0.000203563	2.36661e-05	0	0
1269	0.000661628	0.000211498	2.52097e-05	0	0
1270	0.000653849	0.000217825	2.67172e-05	0	0
1271	0.000647134	0.000221993	2.81545e-05	0	0
1272	0.000641439	0.000223992	2.95434e-05	0	0
1273	0.000636537	0.000223881	2.9954e-05	2.83837e-06	0
1274	0.000632226	0.000222537	2.99273e-05	6.90805e-06	0
1275	0.000628348	0.00022073	2.9768e-05	1.12467e-05	0
1276	0.000624805	0.00021895	2.95621e-05	1.55374e-05	0
1277	0.000621545	0.000217411	2.93562e-05	1.96154e-05	0
1278	0.00061854	0.000216098	2.91648e-05	2.34492e-05	0
1279	0.000615764	0.000214878	2.8983e-05	2.70848e-05	0
1280	0.000613182	0.000213594	2.87962e-05	3.05881e-05	0
1281	0.000610747	0.000212132	2.85872e-05	3.40084e-05	0
1282	0.000608412	0.000210442	2.83397e-05	3.73668e-05	0
1283	0.000606132	0.000208528	2.80403e-05	4.06612e-05	0
1284	0.000603872	0.00020643	2.76794e-05	4.38783e-05	0
1285	0.000601614	0.000204204	2.72528e-05	4.70044e-05	0
1286	0.000599354	0.000201911	2.67626e-05	5.00334e-05	0
1287	0.000597103	0.000199607	2.62176e-05	5.29698e-05	0
1288	0.000594884	0.000197341	2.56328e-05	5.5829e-05	0
1289	0.000592726	0.000195156	2.50277e-05	5.86356e-05	0
1290	0.00059066	0.000193088	2.44246e-05	6.14199e-05	0
1291	0.000588718	0.00019117	2.38453e-05	6.42145e-05	0
1292	0.000586928	0.000189432	2.33091e-05	6.70506e-05	0
1293	0.000585315	0.000187909	2.28309e-05	6.99553e-05	0
1294	0.000583901	0.000186634	2.24202e-05	7.29494e-05	0
1295	0.000582706	0.000185645	2.20807e-05	7.60469e-05	0
1296	0.000581748	0.000184983	2.18116e-05	7.92545e-05	0
1297	0.000581045	0.000184689	2.16088e-05	8.25727e-05	0
1298	0.000580613	0.000184801	2.14673e-05	8.5997e-05	0
1299	0.000580468	0.000185354	2.13828e-05	8.95196e-05	0
1300	0.000580622	0.000186373	2.13543e-05	9.31303e-05	0
1301	0.000581085	0.000187873	2.1385e-05	9.68182e-05	0
1302	0.000581866	0.000189853	2.14841e-05	0.000100572	0
1303	0.000582969	0.000192294	2.16668e-05	0.000104381	0
1304	0.000584394	0.000195156	2.19543e-05	0.000108234	0
1305	0.000586139	0.000198381	2.23728e-05	0.000112122	0
1306	0.000588202	0.00020189	2.29528e-05	0.000116035	0
1307	0.000590578	0.000205591	2.37276e-05	0.000119963	0
1308	0.00059326	0.000209381	2.47321e-05	0.000123898	0
1309	0.00059624	0.000213153	2.60018e-05	0.000127827	0
1310	0.000599501	0.000216804	2.75726e-05	0.000131737	0
1311	0.00060302	0.000220245	2.94807e-05	0.000135613	0
1312	0.000606761	0.000223404	3.17619e-05	0.000139438	0
1313	0.000610669	0.000226238	3.44516e-05	0.000143197	0
1314	0.000614674	0.000228732	3.75823e-05	0.000146874	0
1315	0.000618688	0.000230908	4.11816e-05	0.000150461	0
1316	0.000622609	0.000232823	4.52687e-05	0.000153954	0
1317	0.000626332	0.000234568	4.98519e-05	0.000157356	0
1318	0.000629752	0.000236262	5.49275e-05	0.000160675	0
1319	0.000632774	0.000238044	6.04806e-05	0.000163927	0
1320	0.000635321	0.000240061	6.64887e-05	0.000167123	0
1321	0.000637339	0.00024245	7.2926e-05	0.000170276	0
1322	0.000638801	0.000245327	7.97693e-05	0.000173386	0
1323	0.000639712	0.000248772	8.70015e-05	0.000176444	0
1324	0.000640105	0.000252825	9.46144e-05	0.000179429	0
1325	0.000640041	0.000257484	0.000102609	0.000182304	0
1326	0.0006396	0.000262715	0.000110992	0.000185023	0
1327	0.000638873	0.000268455	0.000119778	0.000187537	0
1328	0.000637947	0.000274631	0.00012898	0.000189795	0
1329	0.000636899	0.000281167	0.000138614	0.000191752	0
1330	0.000635784	0.000287993	0.000148691	0.000193376	0
1331	0.000634637	0.000295049	0.000159218	0.000194643	0
1332	0.000633473	0.000302286	0.000170195	0.000195544	0
1333	0.000632291	0.000309665	0.000181617	0.000196078	0
1334	0.000631087	0.00031715	0.000193468	0.000196253	0
1335	0.00062986	0.000324706	0.000205721	0.000196082	0
1336	0.000628624	0.00033229	0.000218338	0.000195581	0
1337	0.000627411	0.000339852	0.000231265	0.000194771	0
1338	0.000626276	0.000347329	0.00024443	0.000193677	0
1339	0.000625296	0.000354647	0.000257749	0.000192327	0
1340	0.000624553	0.000361729	0.000271123	0.000190758	0
1341	0.000624116	0.000368509	0.000284448	0.000189014	0
1342	0.000624009	0.00037495	0.000297627	0.000187146	0
1343	0.000624177	0.000381069	0.000310577	0.000185216	0
1344	0.000624464	0.000386949	0.000323247	0.000183289	0
1345	0.000624606	0.000392746	0.00033562	0.000181436	0
1346	0.00062426	0.000398672	0.000347715	0.000179725	0
1347	0.000623064	0.000404952	0.000359577	0.000178221	0
1348	0.000620715	0.000411774	0.000371262	0.000176977	0
1349	0.000617048	0.000419234	0.000382821	0.000176039	0
1350	0.000612084	0.000427298	0.000394286	0.000175441	0
1351	0.000606035	0.000435797	0.000405675	0.000175209	0
1352	0.000599259	0.00044445	0.000416996	0.000175371	0
1353	0.000592185	0.000452917	0.000428263	0.000175956	0
1354	0.000585225	0.000460859	0.000439514	0.000177003	0
1355	0.000578707	0.000467997	0.000450822	0.000178552	0
1356	0.000572842	0.000474148	0.000462298	0.000180645	0
1357	0.000567728	0.00047924	0.000474086	0.000183318	0
1358	0.000563367	0.000483302	0.00048635	0.000186598	0
1359	0.000559708	0.000486443	0.000499266	0.000190503	0
1360	0.000556674	0.000488824	0.000513004	0.000195055	0
1361	0.000554181	0.000490632	0.000527725	0.000200284	0
1362	0.000552154	0.000492061	0.000543572	0.000206235	0
1363	0.000550528	0.000493301	0.00056067	0.000212968	0
1364	0.000549244	0.000494531	0.000579132	0.000220546	0
1365	0.000548238	0.000495898	0.000599067	0.000229018	0
1366	0.000547438	0.000497506	0.000620601	0.000238392	0
1367	0.000546749	0.000499385	0.000643901	0.000248612	0
1368	0.00054605	0.000501473	0.000669198	0.000259529	0
1369	0.000545198	0.000503602	0.000696814	0.000270897	0
1370	0.000544046	0.000505505	0.000727171	0.000282373	0
1371	0.000542458	0.000506844	0.000760788	0.000293547	0
1372	0.000540335	0.000507263	0.00079825	0.000303988	0
1373	0.000537629	0.000506445	0.00084017	0.000313301	0
1374	0.000534342	0.000504176	0.00088714	0.000321184	0
1375	0.000530522	0.000500382	0.000939683	0.000327472	0
1376	0.000526235	0.000495147	0.000998228	0.000332153	0
1377	0.000521544	0.000488695	0.00106311	0.000335358	0
1378	0.000516485	0.000481347	0.00113459	0.000337326	0
1379	0.000511057	0.000473461	0.00121291	0.000338344	0
1380	0.000505218	0.000465375	0.00129831	0.000338694	0
1381	0.0004989	0.000457356	0.0013911	0.000338599	0
1382	0.000492025	0.000449567	0.00149166	0.000338192	0
1383	0.00048453	0.000442057	0.00160046	0.000337505	0
1384	0.00047638	0.00043477	0.00171802	0.000336476	0
1385	0.00046759	0.000427563	0.00184494	0.000334968	0
1386	0.000458218	0.00042024	0.00198184	0.0003328	0
1387	0.000448355	0.000412581	0.00212933	0.000329777	0
1388	0.000438098	0.000404383	0.00228801	0.000325718	0
1389	0.000427511	0.000395494	0.00245844	0.000320478	0
1390	0.000416592	0.000385844	0.00264114	0.000313965	0
1391	0.000405255	0.000375458	0.00283655	0.000306145	0
1392	0.000393336	0.000364442	0.00304506	0.000297034	0
1393	0.000380635	0.000352945	0.00326698	0.000286678	0
1394	0.000366976	0.000341104	0.00350263	0.00027513	0
1395	0.000352265	0.000328992	0.00375224	0.000262424	0
1396	0.000336523	0.000316582	0.00401606	0.000248566	0
1397	0.000319886	0.000303761	0.00429427	0.000233524	0
1398	0.000302564	0.000290365	0.00458696	0.000217253	0
1399	0.00028478	0.000276233	0.00489413	0.000199703	0
1400	0.000266727	0.000261253	0.00521558	0.000180852	0
1401	0.000248535	0.000245388	0.00555097	0.000160708	0
1402	0.00023027	0.000228672	0.00589974	0.000139324	0
1403	0.000211956	0.000211189	0.00626114	0.00011679	0
1404	0.000193598	0.000193051	0.00663426	9.32368e-05	0
1405	0.000175208	0.00017437	0.00701795	6.88217e-05	0
1406	0.00015682	0.000155249	0.00741095	4.37284e-05	0
1407	0.000138497	0.000135776	0.0078118	1.81598e-05	0
1408	0.000120238	0.000115007	0.00821632	0	0
1409	0.000102027	9.16165e-05	0.00861924	0	0
1410	8.41788e-05	6.81347e-05	0.0090249	0	0
1411	6.67872e-05	4.46837e-05	0.0094314	0	0
1412	4.99201e-05	2.14013e-05	0.0098368	0	0
1413	3.31764e-05	0	0.0102387	0	0
1414	1.11753e-05	0	0.0106301	0	0
1415	0	0	0.0110059	0	0
1416	0	0	0.0113639	0	0
1417	0	0	0.0117113	0	0
1418	0	0	0.0120458	0	0
1419	0	0	0.0123657	0	0
1420	0	0	0.0126689	0	0
1421	0	0	0.0129538	0	0
1422	0	0	0.0132187	0	0
1423	0	0	0.0134623	0	0
1424	0	0	0.0136835	0	0
1425	0	0	0.0138815	0	0
1426	0	0	0.0140555	0	0
1427	0	0	0.0142052	0	0
1428	0	0	0.0143304	0	0
1429	0	0	0.0144308	0	0
1430	0	0	0.0145061	0	0
1431	0	0	0.0145562	0	0
1432	0	0	0.0145807	0	0
1433	0	0	0.0145792	0	0
1434	0	0	0.0145515	0	0
1435	0	0	0.0144971	0	0
1436	0	0	0.0144158	0	0
1437	0	0	0.0143078	0	0
1438	0	0	0.014173	0	0
1439	0	0	0.0140118	0	0
1440	0	0	0.0138248	0	0
1441	0	0	0.0136128	0	0
1442	8.7178e-06	0	0.0133697	0	0
1443	3.10497e-05	0	0.0130927	0	0
1444	5.46528e-05	0	0.0127935	0	0
1445	7.94142e-05	0	0.012474	0	0
1446	0.000105201	0	0.012136	0	0
1447	0.000129361	9.01436e-06	0.0117792	0	0
1448	0.000150152	3.21239e-05	0.0114029	3.62338e-06	0
1449	0.000170992	5.19075e-05	0.0110035	3.73149e-05	0
1450	0.00019208	7.23661e-05	0.0105929	7.1235e-05	0
1451	0.000213314	9.35879e-05	0.0101727	0.000105166	0
1452	0.000234636	0.000115686	0.00974428	0.000138932	0
1453	0.000256035	0.000138791	0.00930937	0.000172394	0
1454	0.000277519	0.00016305	0.00886962	0.000205437	0
1455	0.000299052	0.000188605	0.00842704	0.000237967	0
1456	0.00032049	0.000215564	0.00798399	0.000269877	0
1457	0.000341545	0.00024393	0.0075433	0.000300998	0
1458	0.000361818	0.00027351	0.00710814	0.000331012	0
1459	0.000380902	0.000303815	0.00668195	0.000359382	0
1460	0.000398508	0.000334044	0.00626816	0.00038532	0
1461	0.000414548	0.000363167	0.00586991	0.000407883	0
1462	0.000429139	0.000390131	0.00548978	0.000426155	0
1463	0.00044253	0.000414128	0.00512958	0.000439494	0
1464	0.000454999	0.000434809	0.00479019	0.000447727	0
1465	0.000466782	0.000452362	0.00447161	0.000451212	0
1466	0.000478041	0.000467422	0.00417315	0.000450749	0
1467	0.000488863	0.000480868	0.00389367	0.000447366	0
1468	0.000499269	0.000493582	0.00363187	0.000442091	0
1469	0.000509232	0.000506273	0.00338647	0.000435758	0
1470	0.000518695	0.000519405	0.00315638	0.000428908	0
1471	0.000527609	0.000533228	0.00294068	0.000421779	0
1472	0.000535954	0.000547841	0.00273862	0.000414377	0
1473	0.000543692	0.000563222	0.00254956	0.000406636	0
1474	0.000550665	0.000579195	0.00237295	0.000398609	0
1475	0.000556553	0.000595421	0.00220825	0.00039058	0
1476	0.000561022	0.000611505	0.00205498	0.000382942	0
1477	0.000564016	0.000627203	0.00191264	0.00037592	0
1478	0.000565884	0.000642535	0.00178071	0.00036942	0
1479	0.000567207	0.000657675	0.00165868	0.000363157	0
1480	0.000568468	0.000672757	0.00154601	0.000356917	0
1481	0.000569884	0.000687785	0.00144219	0.00035069	0
1482	0.000571451	0.000702684	0.00134669	0.000344604	0
1483	0.000573069	0.000717398	0.00125894	0.000338809	0
1484	0.000574619	0.000731936	0.00117838	0.000333405	0
1485	0.000575987	0.000746367	0.0011044	0.000328445	0
1486	0.000577055	0.000760788	0.00103641	0.000323964	0
1487	0.000577707	0.000775294	0.00097381	0.000320001	0
1488	0.000577826	0.000789954	0.00091604	0.000316608	0
1489	0.000577315	0.000804794	0.000862562	0.000313856	0
1490	0.000576097	0.0008198	0.000812888	0.000311815	0
1491	0.000574141	0.000834914	0.000766584	0.000310533	0
1492	0.000571475	0.000850043	0.000723285	0.000310005	0
1493	0.000568187	0.000865045	0.000682696	0.000310154	0
1494	0.000564424	0.000879707	0.000644602	0.000310834	0
1495	0.000560356	0.000893709	0.00060887	0.000311851	0
1496	0.000556145	0.000906602	0.000575439	0.000313005	0
1497	0.000551907	0.000917818	0.000544308	0.000314128	0
1498	0.000547701	0.000926733	0.000515503	0.0003151	0
1499	0.000543528	0.000932773	0.000489043	0.000315845	0
1500	0.000539352	0.000935529	0.000464899	0.000316318	0
1501	0.000535127	0.000934844	0.000442972	0.000316478	0
1502	0.000530816	0.000930852	0.000423077	0.000316277	0
1503	0.000526395	0.000923942	0.000404955	0.000315662	0
1504	0.000521844	0.000914689	0.0003883	0.00031458	0
1505	0.000517123	0.000903765	0.000372796	0.000312991	0
1506	0.00051215	0.00089186	0.000358155	0.000310868	0
1507	0.000506785	0.000879629	0.000344146	0.000308199	0
1508	0.000500844	0.000867643	0.000330609	0.000304975	0
1509	0.000494134	0.000856351	0.000317451	0.000301195	0
1510	0.000486505	0.00084604	0.00030463	0.000296866	0
1511	0.000477899	0.0008368	0.000292133	0.000292018	0
1512	0.00046837	0.000828509	0.000279958	0.000286715	0
1513	0.000458079	0.000820862	0.000268104	0.000281064	0
1514	0.000447256	0.000813419	0.000256574	0.000275213	0
1515	0.00043615	0.000805685	0.000245379	0.000269327	0
1516	0.000424991	0.000797189	0.000234549	0.000263563	0
1517	0.000413976	0.000787553	0.000224128	0.000258037	0
1518	0.000403268	0.000776525	0.000214175	0.000252805	0
1519	0.000393005	0.000763994	0.000204746	0.000247855	0
1520	0.000383303	0.000749988	0.000195889	0.000243122	0
1521	0.000374254	0.000734649	0.00018763	0.00023851	0
1522	0.000365912	0.000718208	0.000179977	0.000233925	0
1523	0.000358283	0.000700952	0.000172912	0.000229292	0
1524	0.000351329	0.000683194	0.000166399	0.000224572	0
1525	0.000344975	0.00066524	0.000160389	0.000219758	0
1526	0.000339123	0.000647362	0.00015482	0.000214871	0
1527	0.000333674	0.000629782	0.000149624	0.000209954	0
1528	0.000328532	0.000612665	0.000144733	0.000205057	0
1529	0.000323625	0.000596121	0.000140078	0.000200229	0
1530	0.000318908	0.000580219	0.000135592	0.000195504	0
1531	0.000314368	0.000565003	0.000131218	0.000190897	0
1532	0.000310018	0.000550502	0.000126901	0.000186409	0
1533	0.000305879	0.000536728	0.000122597	0.000182039	0
1534	0.000301956	0.000523675	0.00011827	0.000177809	0
1535	0.00029822	0.000511311	0.000113896	0.000173777	0
1536	0.000294624	0.000499591	0.000109463	0.000170021	0
1537	0.000291131	0.000488476	0.00010497	0.000166607	0
1538	0.000287754	0.000477961	0.000100433	0.000163543	0
1539	0.000284557	0.000468068	9.58911e-05	0.000160767	0
1540	0.000281613	0.000458815	9.14056e-05	0.000158185	0
1541	0.000278956	0.000450178	8.7064e-05	0.000155716	0
1542	0.000276546	0.000442062	8.29677e-05	0.000153339	0
1543	0.000274287	0.000434316	7.92133e-05	0.000151098	0
1544	0.000272071	0.000426772	7.58701e-05	0.000149077	0
1545	0.000269835	0.000419294	7.29644e-05	0.000147362	0
1546	0.000267585	0.000411812	7.04752e-05	0.00014601	0
1547	0.000265386	0.000404331	6.83434e-05	0.000145042	0
1548	0.000263331	0.000396924	6.64895e-05	0.00014445	0
1549	0.000261506	0.000389703	6.48312e-05	0.000144208	0
1550	0.00025996	0.000382799	6.32964e-05	0.00014429	0
1551	0.000258711	0.000376342	6.18287e-05	0.000144666	0
1552	0.000257748	0.000370449	6.0386e-05	0.000145312	0
1553	0.000257055	0.000365219	5.89362e-05	0.000146199	0
1554	0.000256619	0.000360734	5.74534e-05	0.000147297	0
1555	0.000256433	0.000357051	5.59153e-05	0.000148576	0
1556	0.000256496	0.000354206	5.43025e-05	0.000150015	0
1557	0.000256791	0.000352208	5.25999e-05	0.000151609	0
1558	0.000257279	0.000351038	5.07977e-05	0.000153385	0
1559	0.000257886	0.000350651	4.88926e-05	0.000155398	0
1560	0.000258503	0.000350986	4.68876e-05	0.000157735	0
1561	0.000258999	0.000351971	4.47912e-05	0.000160495	0
1562	0.000259244	0.00035355	4.26155e-05	0.000163771	0
1563	0.000259128	0.000355684	4.0374e-05	0.000167629	0
1564	0.000258584	0.000358365	3.80803e-05	0.000172096	0
1565	0.000257588	0.000361612	3.57469e-05	0.000177157	0
1566	0.000256164	0.00036545	3.33849e-05	0.000182765	0
1567	0.000254362	0.000369906	3.10044e-05	0.000188856	0
1568	0.000252259	0.000374986	2.86133e-05	0.000195366	0
1569	0.000249938	0.000380674	2.62174e-05	0.000202237	0
1570	0.000247491	0.000386934	2.38184e-05	0.000209425	0
1571	0.000245011	0.000393715	2.14127e-05	0.000216901	0
1572	0.000242593	0.000400962	1.899e-05	0.000224642	0
1573	0.000240327	0.000408634	1.65325e-05	0.000232632	0
1574	0.000238309	0.000416708	1.40153e-05	0.000240852	0
1575	0.000236637	0.000425193	1.14065e-05	0.000249272	0
1576	0.000235415	0.000434133	8.66966e-06	0.000257849	0
1577	0.000234742	0.000443596	5.76735e-06	0.000266534	0
1578	0.000234665	0.000453639	2.66725e-06	0.000275312	0
1579	0.000235113	0.00046424	0	0.000284011	0
1580	0.00023584	0.000475239	0	0.000291988	0
1581	0.000236757	0.000486623	0	0.000300387	0
1582	0.000237787	0.000498254	0	0.000309324	0
1583	0.000239149	0.000509969	0	0.00031873	0
1584	0.000241407	0.000521541	0	0.000328339	0
1585	0.000245212	0.00053275	0	0.000337806	0
1586	0.00025071	0.000543756	0	0.000346897	0
1587	0.000256981	0.000555519	0	0.000355618	0
1588	0.000262262	0.000569632	0	0.000364172	0
1589	0.000265158	0.000587294	0	0.000372722	0
1590	0.000265789	0.000608327	0	0.000381179	0
1591	0.000265656	0.000631312	0	0.000389223	0
1592	0.000266395	0.000654733	0	0.000396519	0
1593	0.000268761	0.000677885	0	0.000402901	0
1594	0.000272612	0.000700883	0	0.000408383	0
1595	0.000277454	0.000724157	0	0.000413082	0
1596	0.000282869	0.000748063	0	0.000417147	0
1597	0.000288622	0.000772796	0	0.000420743	0
1598	0.000294595	0.00079845	0	0.000424049	0
1599	0.000300723	0.00082509	0	0.000427264	0
1600	0.000306964	0.000852785	0	0.000430598	0
1601	0.000313294	0.000881616	0	0.000434262	0
1602	0.000319701	0.000911671	0	0.000438461	0
1603	0.000326191	0.000943038	0	0.000443381	0
1604	0.00033278	0.000975794	0	0.000449185	0
1605	0.000339488	0.00100999	0	0.000456012	0
1606	0.000346334	0.00104564	0	0.000463969	0
1607	0.000353212	0.00108259	2.79409e-06	0.000472133	0
1608	0.000360118	0.00112075	8.34342e-06	0.000480547	0
1609	0.00036716	0.00116011	1.33672e-05	0.000490357	0
1610	0.000374308	0.00120046	1.78138e-05	0.000501498	0
1611	0.000381526	0.00124156	2.168e-05	0.00051382	0
1612	0.000388776	0.00128315	2.50067e-05	0.000527101	0
1613	0.00039602	0.00132493	2.78673e-05	0.000541062	0
1614	0.000403226	0.00136663	3.03499e-05	0.000555398	0
1615	0.00041036	0.00140801	3.25351e-05	0.000569826	0
1616	0.000417393	0.00144887	3.44754e-05	0.000584115	0
1617	0.000424301	0.00148907	3.61777e-05	0.000598124	0
1618	0.000431069	0.00152856	3.7596e-05	0.000611817	0
1619	0.000437693	0.00156733	3.86328e-05	0.000625261	0
1620	0.000444189	0.00160545	3.91523e-05	0.000638616	0
1621	0.000450587	0.00164302	3.90004e-05	0.000652104	0
1622	0.000456933	0.00168018	3.80275e-05	0.000665985	0
1623	0.000463273	0.00171706	3.61116e-05	0.000680514	0
1624	0.000469653	0.00175379	3.31745e-05	0.000695923	0
1625	0.0004761	0.00179051	2.91918e-05	0.000712391	0
1626	0.000482619	0.00182732	2.41956e-05	0.000730034	0
1627	0.000489178	0.00186431	1.82694e-05	0.000748905	0
1628	0.000495706	0.00190151	1.15394e-05	0.000769011	0
1629	0.000502087	0.00193889	4.16271e-06	0.00079033	0
1630	0.000508024	0.0019761	0	0.000811531	0
1631	0.000513308	0.0020128	0	0.000832347	0
1632	0.000517922	0.00204868	0	0.000854367	0
1633	0.000521699	0.00208319	0	0.000877721	0
1634	0.000524508	0.00211576	0	0.000902536	0
1635	0.000526276	0.0021459	0	0.000928905	0
1636	0.000527004	0.00217326	0	0.000956866	0
1637	0.00052678	0.00219766	0	0.000986401	0
1638	0.000525767	0.00221899	0	0.00101745	0
1639	0.000524191	0.00223723	0	0.00104996	0
1640	0.00052231	0.00225235	0	0.00108393	0
1641	0.000520374	0.00226437	0	0.00111942	0
1642	0.000518573	0.00227332	0	0.00115664	0
1643	0.000517003	0.00227928	0	0.00119589	0
1644	0.00051564	0.00228231	0	0.00123761	0
1645	0.000514339	0.00228243	0	0.00128234	0
1646	0.000512868	0.00227955	0	0.00133066	0
1647	0.000510976	0.00227343	0	0.00138318	0
1648	0.000508469	0.00226377	0	0.00144041	0
1649	0.000505281	0.00225032	0	0.00150278	0
1650	0.00050144	0.00223288	0	0.00157058	0
1651	0.000496915	0.00221138	0	0.00164417	0
1652	0.000491421	0.00218576	0	0.0017241	0
1653	0.000484431	0.00215596	0	0.00181109	0
1654	0.000475496	0.00212202	0	0.00190584	0
1655	0.000464635	0.00208414	0	0.00200868	0
1656	0.000452386	0.00204276	0	0.00211956	0
1657	0.00043947	0.00199839	0	0.00223835	0
1658	0.000426415	0.00195154	0	0.0023651	0
1659	0.000413448	0.00190267	0	0.00250016	0
1660	0.000400667	0.00185229	0	0.00264406	0
1661	0.000388436	0.0018015	0	0.00279744	0
1662	0.000377829	0.00175275	0	0.00296106	0
1663	0.000369687	0.00170789	0	0.00313558	0
1664	0.000361616	0.00166188	0	0.00332082	0
1665	0.000349292	0.0016056	0	0.00351609	0
1666	0.000333212	0.00154019	0	0.00372169	0
1667	0.000317727	0.00147504	0	0.00393871	0
1668	0.000304401	0.00141396	0	0.00416748	0
1669	0.000291962	0.00135505	0	0.00440761	0
1670	0.000279225	0.00129675	0	0.00465869	0
1671	0.000265709	0.00123888	0	0.00492047	0
1672	0.000251287	0.00118171	0	0.00519275	0
1673	0.000236038	0.00112543	0	0.00547532	0
1674	0.000220207	0.00106997	0	0.00576781	0
1675	0.000204155	0.00101486	0	0.00606964	0
1676	0.000188272	0.000959238	0	0.00637989	0
1677	0.00017289	0.000901898	0	0.00669729	0
1678	0.000158212	0.000841572	0	0.00702032	0
1679	0.000144295	0.000777282	0	0.00734735	0
1680	0.000131045	0.000708683	0	0.00767691	0
1681	0.000118266	0.000636244	0	0.0080078	0
1682	0.000105714	0.000561163	0	0.00833909	0
1683	9.31749e-05	0.000485034	0	0.00867	0
1684	8.05272e-05	0.000409423	0	0.0089997	0
1685	6.77871e-05	0.00033551	0	0.00932718	0
1686	5.51032e-05	0.000263954	0	0.00965112	0
1687	4.27107e-05	0.000194956	0	0.00996996	0
1688	3.08615e-05	0.00012847	0	0.010282	0
1689	1.97645e-05	6.44136e-05	0	0.0105854	0
1690	9.55503e-06	2.80888e-06	0	0.0108784	0
1691	0	0	0	0.0111238	0
1692	0	0	0	0.0113485	0
1693	0	0	0	0.011561	0
1694	0	0	0	0.0117599	0
1695	0	0	0	0.0119443	0
1696	0	0	0	0.0121129	0
1697	0	0	0	0.0122648	0
1698	0	0	0	0.0123991	0
1699	0	0	0	0.012515	0
1700	0	0	0	0.0126117	0
1701	0	0	1.37391e-05	0.0126831	0
1702	0	0	7.99679e-05	0.0127126	0
1703	0	0	0.000155621	0.0127179	0
1704	0	0	0.000240932	0.0126988	0
1705	0	0	0.000335767	0.0126554	0
1706	0	0	0.000439514	0.0125882	0
1707	0	0	0.000551053	0.0124979	0
1708	0	0	0.000668815	0.0123855	0
1709	0	0	0.000790957	0.0122525	0
1710	0	0	0.000915622	0.0121	0
1711	0	0	0.00104123	0.0119297	0
1712	0	0	0.00116671	0.0117428	0
1713	0	0	0.00129165	0.0115406	0
1714	0	0	0.00141624	0.0113243	0
1715	0	0	0.00154113	0.0110949	0
1716	0	0	0.00166709	0.0108535	0
1717	0	0	0.00179473	0.0106013	0
1718	0	0	0.00192412	0.0103397	0
1719	0	0	0.00205295	0.0100696	2.75136e-05
1720	0	0	0.00218064	0.00979353	6.29591e-05
1721	0	0	0.00230478	0.00951387	9.87974e-05
1722	7.65599e-06	0	0.00241718	0.00922861	0.000130608
1723	2.02722e-05	1.95482e-05	0.00250948	0.00893121	0.00015752
1724	2.49972e-05	6.95781e-05	0.00258082	0.00862532	0.000185358
1725	2.93031e-05	0.000120729	0.00262971	0.00832458	0.000213312
1726	3.30889e-05	0.000173275	0.00265241	0.00803127	0.000241694
1727	3.6343e-05	0.000227735	0.00264718	0.00774722	0.000270852
1728	3.91432e-05	0.00028465	0.00261484	0.00747368	0.000300957
1729	4.16467e-05	0.000344307	0.00255886	0.00721117	0.000331812
1730	4.4082e-05	0.000406548	0.00248487	0.00695958	0.000362807
1731	4.6715e-05	0.000470697	0.00239956	0.00671833	0.000393035
1732	4.97643e-05	0.000535603	0.00230955	0.00648676	0.000421507
1733	5.3291e-05	0.000599783	0.00222031	0.00626438	0.000447363
1734	5.71561e-05	0.000661676	0.00213567	0.00605097	0.000469987
1735	6.11141e-05	0.000720031	0.00205767	0.00584652	0.000489027
1736	6.49836e-05	0.000774281	0.00198684	0.00565089	0.000504343
1737	6.87381e-05	0.000824701	0.0019227	0.00546367	0.000515929
1738	7.2442e-05	0.000872241	0.00186418	0.00528423	0.000523837
1739	7.61185e-05	0.000918126	0.00181013	0.00511185	0.000528159
1740	7.9694e-05	0.000963447	0.00175952	0.00494583	0.000529036
1741	8.30583e-05	0.00100891	0.00171156	0.00478559	0.000526691
1742	8.61679e-05	0.00105477	0.00166577	0.0046306	0.00052143
1743	8.91048e-05	0.0011009	0.00162183	0.00448039	0.000513626
1744	9.20561e-05	0.00114691	0.00157958	0.00433455	0.00050366
1745	9.523e-05	0.00119225	0.00153894	0.00419274	0.000491885
1746	9.87363e-05	0.00123633	0.00149989	0.0040547	0.000478608
1747	0.000102475	0.00127865	0.00146248	0.00392025	0.000464101
1748	0.000106082	0.00131884	0.00142676	0.00378927	0.000448638
1749	0.000108964	0.00135672	0.00139285	0.00366167	0.000432506
1750	0.000110449	0.00139232	0.00136077	0.00353743	0.000416001
1751	0.00010998	0.00142575	0.00133044	0.00341654	0.000399383
1752	0.00010729	0.00145715	0.00130162	0.00329903	0.000382824
1753	0.000102483	0.00148664	0.00127389	0.00318499	0.00036638
1754	9.59709e-05	0.00151428	0.00124672	0.00307456	0.000349996
1755	8.83249e-05	0.00154013	0.00121955	0.00296792	0.000333544
1756	8.00996e-05	0.00156432	0.00119191	0.00286537	0.000316879
1757	7.17068e-05	0.00158702	0.00116343	0.00276721	0.000299887
1758	6.33675e-05	0.0016085	0.00113387	0.00267384	0.000282512
1759	5.51343e-05	0.00162907	0.00110314	0.00258562	0.000264768
1760	4.69504e-05	0.00164904	0.00107118	0.00250291	0.000246735
1761	3.87131e-05	0.00166869	0.00103799	0.00242597	0.00022855
1762	3.03252e-05	0.00168822	0.00100362	0.00235499	0.00021039
1763	2.17273e-05	0.00170782	0.000968089	0.00228998	0.000192451
1764	1.29148e-05	0.00172761	0.000931484	0.00223085	0.000174929
1765	3.9397e-06	0.0017477	0.000893906	0.00217732	0.000157993
1766	0	0.00176381	0.000853794	0.00212847	0.000139421
1767	0	0.00177714	0.000811758	0.00208384	0.000119859
1768	0	0.00179139	0.000769417	0.00204312	0.000101223
1769	0	0.00180683	0.000727122	0.0020055	8.3568e-05
1770	0	0.00182371	0.000685269	0.00197006	6.69139e-05
1771	0	0.00184219	0.000644293	0.00193586	5.12554e-05
1772	0	0.00186236	0.000604667	0.00190188	3.65793e-05
1773	0	0.00188421	0.000566898	0.00186717	2.28852e-05
1774	0	0.00190766	0.000531536	0.00183078	1.02125e-05
1775	0	0.00193254	0.000499113	0.00179185	0
1776	0	0.00195857	0.000469879	0.0017495	0
1777	0	0.00198571	0.000444997	0.00170343	0
1778	0	0.00201373	0.000424803	0.00165338	0
1779	0	0.00204224	0.000409009	0.00159941	0
1780	0	0.00207064	0.000396474	0.00154196	0
1781	0	0.00209815	0.000385378	0.00148183	0
1782	0	0.00212394	0.000373865	0.00141997	0
1783	0	0.00214736	0.000360812	0.00135729	0
1784	0	0.00216804	0.000346176	0.00129452	0
1785	0	0.00218585	0.000330687	0.00123216	0
1786	0	0.00220083	0.000315166	0.0011707	0
1787	0	0.00221309	0.000299967	0.00111064	0
1788	0	0.0022229	0.000284849	0.00105269	0
1789	0	0.00223072	0.000269176	0.000997723	0
1790	0	0.0022372	0.000252252	0.000946661	0
1791	0	0.00224292	0.000233631	0.000900246	0
1792	0	0.00224804	0.000213359	0.000858724	0
1793	0	0.00225199	0.000192096	0.000821607	0
1794	0	0.00225349	0.000171008	0.000787705	0
1795	0	0.00225101	0.000151391	0.000755499	0
1796	0	0.00224345	0.00013414	0.000723739	0
1797	0	0.00223079	0.000119337	0.000691963	0
1798	0	0.0022142	0.000106193	0.000660626	0
1799	0	0.00219564	9.33961e-05	0.000630778	0
1800	0	0.00217713	7.96765e-05	0.000603516	0
1801	0	0.00216015	6.42876e-05	0.000579505	0
1802	0	0.00214533	4.71938e-05	0.000558817	0
1803	0	0.00213258	2.89557e-05	0.000541048	0
1804	0	0.00212137	1.04412e-05	0.000525596	0
1805	0	0.00211038	0	0.000509157	0
1806	0	0.00209873	0	0.000490689	0
1807	0	0.00208653	0	0.000473884	0
1808	0	0.0020732	0	0.000458626	0
1809	0	0.00205829	0	0.000444776	0
1810	0	0.00204167	0	0.000432189	0
1811	0	0.00202353	0	0.000420737	0
1812	0	0.00200446	0	0.000410314	0
1813	0	0.00198525	0	0.000400814	0
1814	0	0.0019668	0	0.000392067	0
1815	0	0.00194988	0	0.000383788	0
1816	0	0.00193503	0	0.000375583	0
1817	0	0.0019226	0	0.000367035	0
1818	0	0.00191288	0	0.000357815	0
1819	0	0.00190613	0	0.000347758	0
1820	0	0.00190268	0	0.000336834	0
1821	0	0.00190277	0	0.000325055	0
1822	0	0.00190661	0	0.000312375	0
1823	0	0.00191423	0	0.00029864	0
1824	0	0.00192563	0	0.000283611	0
1825	0	0.00194078	0	0.000267008	0
1826	0	0.00195964	0	0.000248573	0
1827	0	0.00198223	0	0.00022811	0
1828	0	0.00200851	0	0.000205534	0
1829	0	0.00203835	0	0.000180903	0
1830	0	0.00207145	0	0.000154462	0
1831	0	0.00210725	0	0.000126663	0
1832	0	0.00214485	0	9.81706e-05	0
1833	0	0.00218309	0	6.98151e-05	0
1834	0	0.00222057	0	4.25108e-05	0
1835	0	0.00225578	0	1.71367e-05	0
1836	0	0.00228623	0	0	0
1837	0	0.00230908	0	0	0
1838	0	0.00232684	0	0	0
1839	0	0.00233904	0	0	0
1840	0	0.00234556	0	0	0
1841	0	0.00234654	0	0	0
1842	0	0.00234235	0	0	0
1843	0	0.00233341	0	0	0
1844	0	0.00232016	0	0	0
1845	0	0.00230297	0	0	0
1846	0	0.00228217	0	0	0
1847	0	0.00225805	0	0	0
1848	0	0.00223092	0	0	0
1849	0	0.00220109	0	0	0
1850	0	0.00216895	0	0	0
1851	0	0.00213493	0	0	0
1852	0	0.00209953	0	0	0
1853	0	0.00206326	0	0	0
1854	0	0.00202664	0	0	0
1855	0	0.00199016	0	0	0
1856	0	0.00195427	0	0	0
1857	0	0.00191927	0	0	0
1858	0	0.00188539	0	0	0
1859	0	0.00185273	0	0	0
1860	0	0.0018213	0	0	0
1861	0	0.00179112	0	0	0
1862	0	0.00176216	0	0	0
1863	0	0.00173446	0	0	0
1864	0	0.00170799	0	0	0
1865	0	0.00168265	0	0	0
1866	0	0.00165809	0	0	0
1867	0	0.0016337	0	0	0
1868	0	0.00160876	0	0	0
1869	0	0.00158257	0	0	3.18588e-06
1870	0	0.00155502	0	0	6.63518e-06
1871	0	0.00152606	0	2.5627e-06	9.02993e-06
1872	0	0.00149701	0	5.46759e-06	1.08407e-05
1873	0	0.00146917	0	7.63985e-06	1.24079e-05
1874	0	0.00144357	0	8.85598e-06	1.38677e-05
1875	0	0.00142092	0	8.89442e-06	1.52086e-05
1876	0	0.00140157	0	7.58183e-06	1.63215e-05
1877	0	0.00138554	0	4.83138e-06	1.70718e-05
1878	0	0.00137264	0	6.55776e-07	1.73548e-05
1879	0	0.00136162	0	0	1.66812e-05
1880	0	0.00135267	0	0	1.53269e-05
1881	0	0.00134555	0	0	1.34182e-05
1882	0	0.00133984	0	0	1.1061e-05
1883	0	0.00133518	0	0	8.38945e-06
1884	0	0.00133122	0	0	5.55397e-06
1885	0	0.00132767	0	0	2.70716e-06
1886	0	0.00132436	0	0	0
1887	0	0.00132116	0	0	0
1888	0	0.00131819	0	0	0
1889	0	0.00131558	0	0	0
1890	0	0.00131345	0	0	0
1891	0	0.00131182	0	0	0
1892	0	0.0013106	0	0	0
1893	0	0.00130952	0	0	0
1894	0	0.00130831	0	0	0
1895	0	0.00130671	0	0	0
1896	0	0.00130462	0	0	0
1897	0	0.001302	0	0	0
1898	0	0.0012989	0	0	0
1899	0	0.00129531	0	0	0
1900	0	0.00129118	0	0	0
1901	0	0.00128644	0	0	0
1902	0	0.00128098	0	0	0
1903	0	0.00127478	0	0	0
1904	0	0.00126782	0	0	0
1905	0	0.00126016	0	0	0
1906	0	0.00125188	0	0	0
1907	0	0.00124308	0	0	0
1908	0	0.0012339	0	0	0
1909	0	0.0012245	0	0	0
1910	0	0.00121511	0	0	0
1911	0	0.001206	0	0	0
1912	0	0.00119749	0	0	0
1913	0	0.0011899	0	0	0
1914	0	0.00118341	0	0	0
1915	0	0.00117806	0	0	0
1916	0	0.00117367	0	0	0
1917	0	0.00116992	0	0	0
1918	0	0.0011664	0	0	0
1919	0	0.0011626	0	0	0
1920	0	0.0011579	0	0	0
1921	0	0.00115155	0	0	0
1922	0	0.00114294	0	0	0
1923	0	0.00113185	0	0	0
1924	0	0.00111863	0	0	0
1925	0	0.00110388	0	0	0
1926	0	0.00108829	0	0	0
1927	0	0.00107246	0	0	0
1928	0	0.00105695	0	0	0
1929	0	0.00104217	0	0	0
1930	0	0.00102836	0	0	0
1931	0	0.00101546	0	0	0
1932	0	0.00100321	0	0	0
1933	0	0.000991276	0	0	0
1934	0	0.000979336	0	0	0
1935	0	0.000967189	0	0	0
1936	0	0.000954765	0	0	0
1937	0	0.000942109	0	0	0
1938	0	0.000929356	0	0	0
1939	0	0.000916703	0	0	0
1940	0	0.000904398	0	0	0
1941	0	0.000892772	0	0	0
1942	0	0.000882273	0	0	0
1943	0	0.000873399	0	0	0
1944	0	0.000866423	0	0	0
1945	0	0.000861053	0	0	0
1946	0	0.000856483	0	0	0
1947	0	0.000852034	0	0	0
1948	0	0.000847689	0	0	0
1949	0	0.000843837	0	0	0
1950	0	0.000840503	0	0	0
1951	0	0.000837017	0	0	0
1952	0	0.000832418	0	0	0
1953	0	0.000826013	0	0	1.26935e-06
1954	0	0.000817712	0	0	4.93812e-06
1955	0	0.000808047	0	0	8.14773e-06
1956	0	0.00079771	0	0	1.09592e-05
1957	0	0.000787377	0	0	1.34378e-05
1958	0	0.00077754	0	0	1.56287e-05
1959	0	0.000768465	0	0	1.75755e-05
1960	0	0.000760219	0	0	1.93444e-05
1961	0	0.000752734	0	0	2.10258e-05
1962	0	0.000745873	0	0	2.27136e-05
1963	0	0.000739477	0	0	2.4472e-05
1964	0	0.000733385	0	0	2.63123e-05
1965	0	0.000727454	0	0	2.81915e-05
1966	0	0.000721573	0	0	3.00336e-05
1967	0	0.000715689	0	0	3.17652e-05
1968	0	0.000709827	0	0	3.33475e-05
1969	0	0.000704096	0	0	3.47899e-05
1970	0	0.000698662	0	0	3.61419e-05
1971	0	0.000693696	0	0	3.74675e-05
1972	0	0.000689325	0	0	3.88174e-05
1973	0	0.000685603	0	0	4.02138e-05
1974	0	0.000682513	0	0	4.16608e-05
1975	1.45522e-06	0.000678639	0	0	4.24354e-05
1976	3.14606e-06	0.000675062	0	0	4.33004e-05
1977	5.14769e-06	0.000671697	0	0	4.45392e-05
1978	7.73856e-06	0.000668327	0	0	4.65367e-05
1979	1.12351e-05	0.000664731	0	0	4.96791e-05
1980	1.57644e-05	0.000660808	0	0	5.40127e-05
1981	2.09863e-05	0.000656716	0	0	5.88509e-05
1982	2.6002e-05	0.000652908	0	0	6.27038e-05
1983	2.96488e-05	0.000649934	0	0	6.38281e-05
1984	3.10639e-05	0.000648097	0	0	6.11967e-05
1985	3.01036e-05	0.000647207	0	0	5.51842e-05
1986	2.72923e-05	0.000646646	0	0	4.7397e-05
1987	2.34064e-05	0.000645691	0	0	3.97856e-05
1988	1.9084e-05	0.000643841	0	0	3.37353e-05
1989	1.47049e-05	0.000640953	0	0	2.96952e-05
1990	1.04758e-05	0.000637161	0	0	2.73715e-05
1991	6.52912e-06	0.000632717	0	0	2.61546e-05
1992	2.95185e-06	0.000627852	0	0	2.54721e-05
1993	0	0.000622512	0	0	2.48408e-05
1994	0	0.000614593	0	0	2.29123e-05
1995	0	0.000606853	0	0	2.12664e-05
1996	0	0.000599306	0	0	2.01685e-05
1997	0	0.000592012	0	0	2.00967e-05
[truncated: 2,003 more rows]
[truncated: 72 more columns]

## Sheet: 6 Sources
Reconstructed Source Distributions									Compare Input & Reconstructed Sink Samples					Sink Sample Weights
Age (Ma)	Source 1	Source 2	Source 3	Source 4	Source 5	Source 6				Mean		St. Dev.			Princeton, Bluestone, Hinton	Surprise Canyon3- 06GC149, Surprise_Cyn2, SurpriseC_Cngl	24PL09, 10JM94, 40JM94, 05PL15, 09LB04	Mauch_Chunk	KY-21-SG	Tonka	Stanley, Hot_spring	BC05	09-CM-699	MS11, MS10	MS01, MSGE313	BC01, BC02, CC01	ML01, MP-DZ1	1QZ19	SY-D, Watahomigi, Manakacha1	Tumbling Run, Pottsville Fm, OH-1-SS	Pocohontas, Lee, VA-1-GN	Racoon, Montevallo, Sewanee	KY-18-CB	OH-4-SN	BCRA-01-10	MB1-3, MB2-4, MB2-2, MB2-3, MB2-5, MB2-1, MB1-2, MB1-1	a16, a23, a29, a38, a48, a49, a50	46-1, 46-2	IB_AD, IB_M1, IB_M2	FCB_AD	FCB_A2	FCB_A1	S3	GS01, GS09	MS04, MS05, MS06	MC05, MC17	GS11, GS24	MC20	EC01, RC01, RC19
0	3.50412e-12	0	0	1.7276e-13	0	0			Cross-correlation	0.805572	±	0.124979		Weights Source 1	0.113989	0.143368	0	0.179262	0.175282	0	0.275888	0	0.315528	0	0	0.0165023	0.27756	0.162062	0.107685	0.416933	0.0227614	0.0801229	0.112853	0.27811	0.19794	0.0303484	0.143702	0.0821954	0.270046	0.280154	0.221559	0.0153563	0.199752	0.0237571	0	0	0.014613	0.141849	0.0551169
1	3.59603e-12	0	0	1.77257e-13	0	0			Likeness	0.78993	±	0.0705522		Weights Source 2	0.0108854	0.0827332	0	0.000951693	0.0549751	0	0.0126344	0.109694	0	0.121022	0.475544	0.540052	0.00539233	0.0832958	0.137953	0.00423907	0.0104859	0.0302216	0.0377797	0.00618508	0	0.0398786	0.046317	0.0366093	0.0391062	0.018566	0.0502916	0.00916676	0.0528115	0.260105	0	0.228555	0.492752	0.10354	0.496268
2	3.6903e-12	0	0	1.81866e-13	0	0			Kuiper V Value	0.111954	±	0.0728174		Weights Source 3	0.0415926	0.0804315	0	0.0693516	0.041967	0	0.0223338	0.214206	0.0628564	0.270952	0.198031	0.212031	0.0520445	0.064635	0.0373439	0.0210806	0.0821404	0.0173814	0.025917	0.0270744	0.0232639	0.0293332	0.0429257	0.0411164	0.0141902	0.0806006	0.0501447	0.0237454	0.0210489	0.207733	0.0382059	0.176364	0.484532	0.203942	0.103296
3	3.78699e-12	0	0	1.8659e-13	0	0			KS D Value	0.0799336	±	0.0635044		Weights Source 4	0.000853469	0.00178306	0.00139238	0.00921196	0.00232702	0	0.067829	0.00646251	0.0193399	0	0	0.044418	0.0072473	0	0.00117445	0.00561698	0.00366539	0	0	0	0.00772911	0.00460844	0	0	0	0.0036221	0.00128756	0.00132996	0.0359858	0.000126126	0	0.0119282	0	0.00694869	0.0115647
4	3.88615e-12	0	0	1.91432e-13	0	0								Weights Source 5	0.0287953	0.158626	0.998608	0	0.159419	1	0.0590304	0.603992	0.0525794	0.159133	0.00767878	0.0970415	0.0460839	0.498683	0.446813	0.00173864	0.0195281	0.109221	0.262237	0.0155485	0.108519	0.22482	0.200613	0.182663	0.182819	0.0758205	0.14446	0.179019	0.106518	0.305017	0	0.365282	0	0.346422	0.213202
5	3.98785e-12	0	0	1.96394e-13	0	0			Number of sink samples	108				Weights Source 6	0.803884	0.533058	0	0.741223	0.56603	0	0.562284	0.0656456	0.549696	0.448893	0.318746	0.0899553	0.611671	0.191324	0.269031	0.550392	0.861419	0.763053	0.561213	0.673082	0.662548	0.671012	0.566443	0.657416	0.493838	0.541237	0.532257	0.771383	0.583884	0.203262	0.961794	0.21787	0.00810349	0.197298	0.120552
6	4.09216e-12	0	0	2.01481e-13	0	0			Mean Cross-correlation of sink samples	0.318
7	4.19913e-12	0	0	2.06694e-13	0	0			Range Cross-correlation of sink samples	0.962				Cross-correlation	0.962234	0.9495	0.612331	0.855762	0.931909	0.579965	0.780895	0.590505	0.710192	0.877258	0.889308	0.887716	0.831808	0.700137	0.844553	0.683823	0.909806	0.823276	0.855923	0.884681	0.874578	0.918824	0.851529	0.878877	0.91107	0.907003	0.913886	0.882321	0.896113	0.90308	0.658305	0.882973	0.94304	0.746839	0.836875
8	4.30884e-12	0	0	2.12036e-13	0	0			Mean Kuiper V value of sink samples	0.409				Likeness	0.880627	0.887477	0.624406	0.803835	0.870565	0.587118	0.755779	0.571096	0.755843	0.781115	0.796606	0.784527	0.816431	0.780194	0.827322	0.744065	0.83458	0.753841	0.803068	0.830315	0.799078	0.860875	0.850041	0.836276	0.86288	0.841769	0.865416	0.798935	0.83828	0.809536	0.508705	0.793971	0.832989	0.733529	0.792173
9	4.42135e-12	0	0	2.17511e-13	0	0			Range Kuiper V value of sink samples	0.952				Kuiper V Value	0.03415	0.0370464	0.353752	0.0878022	0.0626235	0.361733	0.123169	0.262511	0.0878842	0.167959	0.0869208	0.0931425	0.0855311	0.168653	0.113084	0.0904147	0.106982	0.0831734	0.0822268	0.0692911	0.0933178	0.0445146	0.0823526	0.0842748	0.0419561	0.0692494	0.0588923	0.131437	0.101207	0.136441	0.461021	0.123297	0.085247	0.181657	0.133946
10	4.53673e-12	0	0	2.23123e-13	0	0			Final Residual	0.164036				KS D Value	0.0322279	0.0209367	0.279957	0.0449873	0.0387429	0.284078	0.0728557	0.224912	0.0589763	0.104853	0.0684959	0.05619	0.0640302	0.0995696	0.0656569	0.0537677	0.0726767	0.0467926	0.0632255	0.0430762	0.0534178	0.0318452	0.0561235	0.0439453	0.0326293	0.0466637	0.037117	0.103902	0.0604122	0.0957265	0.321435	0.106516	0.0514264	0.131176	0.0815736
11	4.65505e-12	0	0	2.28873e-13	0	0			Number of Iterations	220
12	4.77639e-12	0	0	2.34767e-13	0	0
13	4.90081e-12	0	0	2.40806e-13	0	0
14	5.0284e-12	0	0	2.46995e-13	0	0
15	5.15924e-12	0	0	2.53338e-13	0	0
16	5.29339e-12	0	0	2.59837e-13	0	0
17	5.43095e-12	0	0	2.66497e-13	0	0
18	5.572e-12	0	0	2.73322e-13	0	0
19	5.71662e-12	0	0	2.80316e-13	0	0
20	5.86491e-12	0	0	2.87482e-13	0	0
21	6.01694e-12	0	0	2.94825e-13	0	0
22	6.17282e-12	0	0	3.02349e-13	0	0
23	6.33263e-12	0	0	3.10059e-13	0	0
24	6.49648e-12	0	0	3.17959e-13	0	0
25	6.66446e-12	0	0	3.26053e-13	0	0
26	6.83668e-12	0	0	3.34347e-13	0	0
27	7.01323e-12	0	0	3.42845e-13	0	0
28	7.19422e-12	0	0	3.51552e-13	0	0
29	7.37976e-12	0	0	3.60474e-13	0	0
30	7.56996e-12	0	0	3.69615e-13	0	0
31	7.76494e-12	0	0	3.7898e-13	0	0
32	7.9648e-12	0	0	3.88576e-13	0	0
33	8.16968e-12	0	0	3.98408e-13	0	0
34	8.37969e-12	0	0	4.08481e-13	0	0
35	8.59495e-12	0	0	4.18802e-13	0	0
36	8.81559e-12	0	0	4.29376e-13	0	0
37	9.04174e-12	0	0	4.4021e-13	0	0
38	9.27354e-12	0	0	4.5131e-13	0	0
39	9.51112e-12	0	0	4.62683e-13	0	0
40	9.75463e-12	0	0	4.74335e-13	0	0
41	1.00042e-11	0	0	4.86273e-13	0	0
42	1.026e-11	0	0	4.98504e-13	0	0
43	1.05221e-11	0	0	5.11036e-13	0	0
44	1.07908e-11	0	0	5.23876e-13	0	0
45	1.10661e-11	0	0	5.37031e-13	0	0
46	1.13482e-11	0	0	5.5051e-13	0	0
47	1.16374e-11	0	0	5.6432e-13	0	0
48	1.19337e-11	0	0	5.78469e-13	0	0
49	1.22373e-11	0	0	5.92967e-13	0	0
50	1.25485e-11	0	0	6.07822e-13	0	0
51	1.28674e-11	0	0	6.23043e-13	0	0
52	1.31941e-11	0	0	6.38639e-13	0	0
53	1.35289e-11	0	0	6.5462e-13	0	0
54	1.38719e-11	0	0	6.70995e-13	0	0
55	1.42234e-11	0	0	6.87775e-13	0	0
56	1.45836e-11	0	0	7.04969e-13	0	0
57	1.49526e-11	0	0	7.2259e-13	0	0
58	1.53307e-11	0	0	7.40646e-13	0	0
59	1.57181e-11	0	0	7.59151e-13	0	0
60	1.6115e-11	0	0	7.78115e-13	0	0
61	1.65217e-11	0	0	7.97551e-13	0	0
62	1.69383e-11	0	0	8.17471e-13	0	0
63	1.73652e-11	0	0	8.37888e-13	0	0
64	1.78025e-11	0	0	8.58814e-13	0	0
65	1.82505e-11	0	0	8.80264e-13	0	0
66	1.87095e-11	0	0	9.02252e-13	0	0
67	1.91797e-11	0	0	9.24793e-13	0	0
68	1.96614e-11	0	0	9.479e-13	0	0
69	2.01549e-11	0	0	9.7159e-13	0	0
70	2.06604e-11	0	0	9.95879e-13	0	0
71	2.11783e-11	0	0	1.02078e-12	0	0
72	2.17088e-11	0	0	1.04632e-12	0	0
73	2.22523e-11	0	0	1.07251e-12	0	0
74	2.28089e-11	0	0	1.09936e-12	0	0
75	2.33792e-11	0	0	1.12691e-12	0	0
76	2.39633e-11	0	0	1.15516e-12	0	0
77	2.45617e-11	0	0	1.18414e-12	0	0
78	2.51746e-11	0	0	1.21387e-12	0	0
79	2.58025e-11	0	0	1.24437e-12	0	0
80	2.64456e-11	0	0	1.27567e-12	0	0
81	2.71043e-11	0	0	1.30778e-12	0	0
82	2.77791e-11	0	0	1.34074e-12	0	0
83	2.84702e-11	0	0	1.37456e-12	0	0
84	2.91781e-11	0	0	1.40928e-12	0	0
85	2.99033e-11	0	0	1.44493e-12	0	0
86	3.06461e-11	0	0	1.48152e-12	0	0
87	3.14069e-11	0	0	1.5191e-12	0	0
88	3.21861e-11	0	0	1.5577e-12	0	0
89	3.29843e-11	0	0	1.59734e-12	0	0
90	3.38019e-11	0	0	1.63806e-12	0	0
91	3.46394e-11	0	0	1.6799e-12	0	0
92	3.54972e-11	0	0	1.72289e-12	0	0
93	3.63758e-11	0	0	1.76708e-12	0	0
94	3.72758e-11	0	0	1.8125e-12	0	0
95	3.81976e-11	0	0	1.85919e-12	0	0
96	3.91419e-11	0	0	1.9072e-12	0	0
97	4.01091e-11	0	0	1.95659e-12	0	0
98	4.10999e-11	0	0	2.00738e-12	0	0
99	4.21147e-11	0	0	2.05965e-12	0	0
100	4.31543e-11	0	0	2.11343e-12	0	0
101	4.42192e-11	0	0	2.16878e-12	0	0
102	4.53101e-11	0	0	2.22577e-12	0	0
103	4.64276e-11	0	0	2.28446e-12	0	0
104	4.75723e-11	0	0	2.3449e-12	0	0
105	4.87451e-11	0	0	2.40717e-12	0	0
106	4.99465e-11	0	0	2.47133e-12	0	0
107	5.11773e-11	0	0	2.53747e-12	0	0
108	5.24382e-11	0	0	2.60565e-12	0	0
109	5.37301e-11	0	0	2.67597e-12	0	0
110	5.50537e-11	0	0	2.7485e-12	0	0
111	5.64099e-11	0	0	2.82333e-12	0	0
112	5.77994e-11	0	0	2.90057e-12	0	0
113	5.92232e-11	0	0	2.9803e-12	0	0
114	6.06821e-11	0	0	3.06264e-12	0	0
115	6.2177e-11	0	0	3.1477e-12	0	0
116	6.3709e-11	0	0	3.23559e-12	0	0
117	6.5279e-11	0	0	3.32643e-12	0	0
118	6.68879e-11	0	0	3.42035e-12	0	0
119	6.8537e-11	0	0	3.51748e-12	0	0
120	7.02271e-11	0	0	3.61797e-12	0	0
121	7.19595e-11	0	0	3.72197e-12	0	0
122	7.37353e-11	0	0	3.82963e-12	0	0
123	7.55562e-11	0	0	3.94108e-12	0	0
124	7.74495e-11	0	0	4.05429e-12	0	0
125	8.08187e-11	0	0	4.05081e-12	0	0
126	1.36454e-10	0	0	0	0	0
127	1.40898e-09	1.87564e-10	0	0	0	0
128	2.16171e-08	3.17508e-09	0	0	0	0
129	2.30984e-07	3.41288e-08	0	0	0	0
130	1.63322e-06	2.41441e-07	0	0	0	0
131	7.61844e-06	1.12632e-06	0	0	0	0
132	2.34388e-05	3.46527e-06	0	0	0	0
133	4.756e-05	7.03144e-06	0	0	0	0
134	6.36483e-05	9.41e-06	0	0	0	0
135	5.61806e-05	8.30595e-06	0	0	0	0
136	3.27149e-05	4.83669e-06	0	0	0	0
137	1.25921e-05	1.86168e-06	0	0	0	0
138	3.26971e-06	4.83425e-07	0	0	0	0
139	7.34565e-07	1.08638e-07	0	0	0	0
140	4.86997e-07	7.20635e-08	0	0	0	0
141	8.51076e-07	1.25928e-07	0	0	0	0
142	1.57234e-06	2.32614e-07	0	0	0	0
143	2.74192e-06	4.05601e-07	0	0	0	0
144	4.49242e-06	6.645e-07	0	0	0	0
145	6.91459e-06	1.02274e-06	0	0	0	0
146	9.99794e-06	1.47877e-06	0	0	0	0
147	1.35804e-05	2.00866e-06	0	0	0	0
148	1.73289e-05	2.56318e-06	0	0	0	0
149	2.07723e-05	3.07272e-06	0	0	0	0
150	2.33914e-05	3.46052e-06	0	0	0	0
151	2.47448e-05	3.66138e-06	0	0	0	0
152	2.45904e-05	3.63959e-06	0	0	0	0
153	2.29564e-05	3.39935e-06	0	0	0	0
154	2.01324e-05	2.98358e-06	0	0	0	0
155	1.65859e-05	2.4615e-06	0	0	0	0
156	1.28359e-05	1.90999e-06	0	0	0	0
157	9.33146e-06	1.3956e-06	0	0	0	0
158	6.37206e-06	9.62813e-07	0	0	0	0
159	4.08657e-06	6.30934e-07	0	0	0	0
160	2.4606e-06	3.98145e-07	0	0	0	0
161	1.38985e-06	2.49419e-07	0	0	0	0
162	7.34981e-07	1.64697e-07	0	0	0	0
163	3.62383e-07	1.25097e-07	0	0	0	0
164	1.66221e-07	1.16612e-07	0	0	0	0
165	7.52507e-08	1.32101e-07	0	0	0	0
166	3.84157e-08	1.60502e-07	0	0	2.60808e-08	0
167	4.27859e-08	2.09664e-07	0	0	8.81545e-08	0
168	9.01298e-08	2.89199e-07	0	0	2.23163e-07	0
169	1.98169e-07	4.1568e-07	0	0	4.89429e-07	0
170	3.96028e-07	6.11547e-07	0	0	9.6281e-07	0
171	7.14762e-07	8.99789e-07	0	0	1.71937e-06	0
172	1.17167e-06	1.29397e-06	0	0	2.80104e-06	0
173	1.7513e-06	1.78575e-06	0	0	4.17216e-06	0
174	2.39185e-06	2.33587e-06	0	0	5.688e-06	0
175	2.9878e-06	2.87596e-06	0	0	7.10109e-06	0
176	3.41461e-06	3.32502e-06	0	0	8.11943e-06	0
177	3.56945e-06	3.61665e-06	0	0	8.50184e-06	0
178	3.41001e-06	3.72497e-06	0	0	8.14927e-06	0
179	2.97179e-06	3.67611e-06	0	0	7.14525e-06	0
180	2.35481e-06	3.53935e-06	0	0	5.72486e-06	0
181	1.6882e-06	3.40326e-06	0	0	4.19138e-06	0
182	1.09249e-06	3.35054e-06	0	0	2.82794e-06	0
183	6.58061e-07	3.44346e-06	0	0	1.84688e-06	0
184	4.4444e-07	3.72332e-06	0	0	1.38808e-06	0
185	4.89461e-07	4.21653e-06	0	0	1.54045e-06	0
186	8.10034e-07	4.93502e-06	0	0	2.34375e-06	0
187	1.38393e-06	5.864e-06	0	0	3.7458e-06	0
188	2.1218e-06	6.94314e-06	0	0	5.53684e-06	0
189	2.85725e-06	8.0599e-06	0	0	7.32616e-06	0
190	3.38114e-06	9.0724e-06	0	0	8.62262e-06	0
191	3.51772e-06	9.8603e-06	0	0	9.01347e-06	0
192	3.20331e-06	1.03773e-05	0	0	8.34879e-06	0
193	2.51612e-06	1.06714e-05	0	0	6.81178e-06	0
194	1.63614e-06	1.08575e-05	0	0	4.82434e-06	0
195	7.61284e-07	1.10619e-05	0	0	2.85043e-06	0
196	3.22275e-08	1.13719e-05	0	0	1.21954e-06	0
197	0	1.1725e-05	0	0	0	0
198	0	1.17523e-05	0	0	0	0
199	0	1.20736e-05	0	0	0	0
200	0	1.25586e-05	0	0	0	0
201	0	1.31096e-05	0	0	0	0
202	0	1.36663e-05	0	0	0	0
203	0	1.41957e-05	0	0	0	0
204	0	1.46801e-05	0	0	0	0
205	0	1.51093e-05	0	0	0	0
206	0	1.54768e-05	0	0	0	0
207	0	1.57778e-05	0	0	0	0
208	0	1.60092e-05	0	0	0	0
209	0	1.61696e-05	0	0	0	0
210	0	1.62594e-05	0	0	0	0
211	0	1.6281e-05	0	0	0	0
212	0	1.62391e-05	0	0	0	0
213	0	1.61407e-05	0	0	0	0
214	0	1.59952e-05	0	0	0	0
215	0	1.58138e-05	0	0	0	0
216	0	1.56094e-05	0	0	0	0
217	0	1.53955e-05	0	0	0	0
218	6.01875e-07	1.50334e-05	0	0	0	0
219	1.56426e-06	1.45954e-05	0	0	0	0
220	2.69467e-06	1.41386e-05	0	0	0	0
221	3.98233e-06	1.36695e-05	0	0	0	0
222	5.40198e-06	1.31928e-05	0	0	0	0
223	6.91278e-06	1.2711e-05	0	0	0	0
224	8.45905e-06	1.22245e-05	0	0	0	0
225	9.97296e-06	1.17318e-05	0	0	0	0
226	1.13792e-05	1.12302e-05	0	0	0	0
227	1.26015e-05	1.07172e-05	0	0	0	0
228	1.35696e-05	1.01912e-05	0	0	0	0
229	1.42267e-05	9.65332e-06	0	0	0	0
230	1.45356e-05	9.10857e-06	0	0	0	0
231	1.44825e-05	8.56693e-06	0	0	0	0
232	1.40788e-05	8.04423e-06	0	0	0	0
233	1.33591e-05	7.56259e-06	0	0	0	0
234	1.23773e-05	7.15037e-06	0	0	0	0
235	1.12006e-05	6.8417e-06	0	0	0	0
236	9.9018e-06	6.67542e-06	0	0	0	0
237	8.55299e-06	6.69359e-06	0	0	0	0
238	7.22003e-06	6.93922e-06	0	0	0	0
239	5.96186e-06	7.45293e-06	0	0	0	0
240	4.8413e-06	8.26696e-06	0	0	0	0
241	3.96737e-06	9.39257e-06	0	0	0	0
242	3.61691e-06	1.07906e-05	0	0	0	0
243	4.52249e-06	1.23073e-05	0	0	0	0
244	8.42073e-06	1.35554e-05	0	0	0	0
245	1.8807e-05	1.3753e-05	0	0	0	0
246	4.13948e-05	1.16259e-05	0	0	0	0
247	8.31505e-05	5.61283e-06	0	0	0	0
248	0.000147916	0	0	0	0	0
249	0.000231651	0	0	0	0	0
250	0.000320143	0	0	0	0	0
251	0.000388975	0	0	0	0	0
252	0.000414915	0	0	0	0	0
253	0.000388835	0	0	0	0	0
254	0.000321319	0	0	0	0	0
255	0.000236315	0	0	0	0	0
256	0.000157402	3.94198e-06	0	0	0	0
257	9.82513e-05	1.54903e-05	0	0	0	0
258	6.32447e-05	2.15312e-05	0	0	0	0
259	4.71217e-05	2.32158e-05	0	2.06082e-06	0	0
260	4.28973e-05	2.22292e-05	0	4.46315e-06	0	0
261	4.51148e-05	1.99474e-05	0	5.43498e-06	0	0
262	5.05526e-05	1.71851e-05	0	5.53082e-06	0	0
263	5.7811e-05	1.43823e-05	0	4.96354e-06	0	0
264	6.65413e-05	1.17517e-05	0	3.76158e-06	0	0
265	7.69059e-05	9.38004e-06	0	1.8797e-06	0	0
266	8.92701e-05	7.2498e-06	0	0	0	0
267	0.000104092	5.2318e-06	0	0	0	0
268	0.000122159	3.22085e-06	0	0	0	0
269	0.000144369	9.49894e-07	0	0	0	0
270	0.000171409	0	0	0	0	0
271	0.000203922	0	0	0	0	0
272	0.00024151	0	0	0	0	0
273	0.000281617	0	0	0	0	0
274	0.000319301	0	0	0	0	0
275	0.000348025	0	0	0	0	0
276	0.000361714	0	0	0	0	0
277	0.000357255	0	0	0	0	0
278	0.000336054	0	0	0	0	0
279	0.00030363	0	0	0	0	0
280	0.000266483	6.06759e-06	0	0	0	0
281	0.00022963	1.44485e-05	0	0	3.70823e-06	0
282	0.000194839	1.61821e-05	0	0	1.7228e-05	0
283	0.000170268	1.74604e-05	0	0	2.65202e-05	0
284	0.000155043	1.82139e-05	0	0	3.1862e-05	0
285	0.000147542	1.84605e-05	0	0	3.41322e-05	0
286	0.000146568	1.82873e-05	0	0	3.43822e-05	0
287	0.000151717	1.7836e-05	0	0	3.3535e-05	0
288	0.000163131	1.72923e-05	0	0	3.22229e-05	0
289	0.000180997	1.68782e-05	0	0	3.0737e-05	0
290	0.000205107	1.68396e-05	0	0	2.90746e-05	0
291	0.000234615	1.7425e-05	0	0	2.70697e-05	0
292	0.000268065	1.88552e-05	0	0	2.45558e-05	0
293	0.000303727	2.12847e-05	0	0	2.14649e-05	0
294	0.000340297	2.47567e-05	0	0	1.77591e-05	0
295	0.00037798	2.91527e-05	0	0	1.3165e-05	0
296	0.000419561	3.41517e-05	0	0	6.8451e-06	0
297	0.000469063	3.79954e-05	0	0	0	0
298	0.000527579	3.59769e-05	0	0	0	0
299	0.000600005	3.09591e-05	0	0	0	0
300	0.000682189	2.3759e-05	0	0	0	0
301	0.000762773	1.67288e-05	0	0	0	0
302	0.000821562	1.41023e-05	0	0	0	0
303	0.000837964	2.01274e-05	0	0	0	0
304	0.000811131	3.46072e-05	0	0	0	0
305	0.000763602	5.21629e-05	0	0	0	0
306	0.000719945	6.70994e-05	0	0	0	0
307	0.000691483	7.6864e-05	0	0	0	0
308	0.000679983	8.12065e-05	0	0	0	0
309	0.000686582	8.01475e-05	0	0	0	0
310	0.000706354	7.3681e-05	0	0	2.56784e-06	0
311	0.000714216	6.86962e-05	0	0	6.53716e-06	0
312	0.000685574	6.81077e-05	0	0	1.75507e-05	0
313	0.000647834	6.98462e-05	0	0	3.00691e-05	0
314	0.000636633	7.09375e-05	0	0	3.68741e-05	0
315	0.00065283	7.15149e-05	0	0	3.83551e-05	0
316	0.000684661	7.27091e-05	0	0	3.75055e-05	0
317	0.000724266	7.51494e-05	0	0	3.63302e-05	0
318	0.000765338	7.93538e-05	0	0	3.6571e-05	0
319	0.000801089	8.58791e-05	0	4.72281e-06	4.02718e-05	0
320	0.00082642	9.5051e-05	0	1.73651e-05	4.9023e-05	0
321	0.000840528	0.000106	0	3.56048e-05	6.25043e-05	0
322	0.000846374	0.000111671	1.24784e-05	5.0988e-05	7.71443e-05	0
323	0.000849985	0.000113531	2.45391e-05	5.60604e-05	9.00446e-05	0
324	0.000855653	0.000110984	3.36139e-05	4.9297e-05	9.94782e-05	0
325	0.000866527	0.000104384	4.06878e-05	3.74884e-05	0.000105768	0
326	0.000888147	9.49091e-05	4.63132e-05	2.84563e-05	0.000109196	0
327	0.000930004	8.36762e-05	4.8887e-05	2.40683e-05	0.000108227	0
328	0.000999578	7.16664e-05	4.57368e-05	2.12031e-05	0.000100814	0
329	0.00109124	6.00397e-05	3.59795e-05	1.72811e-05	8.75784e-05	0
330	0.00118285	4.99893e-05	2.20884e-05	1.33904e-05	7.30482e-05	0
331	0.00124809	4.21544e-05	8.4169e-06	1.27336e-05	6.30459e-05	0
332	0.0012725	3.58194e-05	0	1.71226e-05	6.09079e-05	0
333	0.00125642	2.98179e-05	0	2.56313e-05	6.65006e-05	0
334	0.00121011	2.64578e-05	0	3.65996e-05	7.78226e-05	0
335	0.00115022	2.43232e-05	0	4.7458e-05	9.08328e-05	0
336	0.0010961	2.13876e-05	0	5.67745e-05	0.000101572	0
337	0.00106048	1.60621e-05	0	6.41143e-05	0.000108293	0
338	0.00104458	8.22938e-06	0	6.84641e-05	0.000111971	0
339	0.00104332	0	0	6.70401e-05	0.000115084	0
340	0.00105361	0	0	5.61158e-05	0.000119967	0
341	0.00107798	0	0	3.57217e-05	0.000131737	0
342	0.00111759	0	0	9.28893e-06	0.000148298	0
343	0.00116649	0	0	0	0.000157053	0
344	0.00121929	0	0	0	0.000143711	0
345	0.0012733	0	0	0	0.000109056	0
346	0.00131514	0	0	0	6.97563e-05	0
347	0.00131739	0	0	0	4.18705e-05	0
348	0.00126888	0	0	0	2.81823e-05	0
349	0.00119816	0	0	1.08114e-06	1.95128e-05	0
350	0.00114683	0	0	2.49985e-05	5.37851e-06	0
351	0.00112359	0	0	3.83922e-05	0	0
352	0.00112078	0	0	3.99799e-05	0	0
353	0.00112655	0	0	3.34917e-05	0	0
354	0.00113371	0	0	2.42524e-05	0	0
355	0.00114269	0	0	1.61945e-05	0	0
356	0.00115757	0	0	1.0324e-05	0	0
357	0.00118297	0	0	5.33422e-06	0	0
358	0.00122116	0	0	0	0	0
359	0.00126946	0	0	0	0	0
360	0.00132097	0	0	0	0	0
361	0.00136619	0	0	0	0	0
362	0.00139707	0	0	0	0	0
363	0.00140985	0	2.19497e-06	0	0	0
364	0.00140709	0	6.48884e-06	0	0	0
365	0.00139685	0	8.92173e-06	0	0	0
366	0.00138757	0	9.44225e-06	0	0	0
367	0.00137502	0	6.55381e-06	0	0	7.1907e-06
368	0.0013376	0	0	0	0	3.93064e-05
369	0.00131474	0	0	0	0	6.30775e-05
370	0.00131506	0	0	0	0	7.88201e-05
371	0.00133059	0	0	0	0	9.12922e-05
372	0.00132932	0	0	0	0	0.000109614
373	0.00130566	0	0	0	0	0.000133852
374	0.00130283	1.08799e-05	0	0	0	0.000149626
375	0.00134885	1.85734e-05	0	0	0	0.000150027
376	0.00141199	2.24598e-05	0	0	0	0.000143664
377	0.00143368	2.6976e-05	0	0	0	0.000146166
378	0.00138406	3.43766e-05	0	0	0	0.000165932
379	0.00128726	4.25907e-05	0	0	0	0.000197559
380	0.0011947	4.74416e-05	0	0	0	0.000228423
381	0.00114188	4.45048e-05	4.69583e-06	0	0	0.000249302
382	0.00113285	3.62156e-05	7.70867e-06	0	0	0.000259489
383	0.00114919	2.4712e-05	8.79367e-06	0	0	0.000263421
384	0.00116573	1.23798e-05	8.5982e-06	0	0	0.000267122
385	0.00116682	8.20119e-07	7.47019e-06	0	0	0.00027461
386	0.00115515	0	1.97351e-06	0	0	0.00028538
387	0.00114623	0	0	0	0	0.000296775
388	0.00115359	0	0	0	0	0.000306505
389	0.00118233	0	0	0	0	0.000314123
390	0.00123035	0	0	0	0	0.000320673
391	0.00128821	0	0	0	0	0.0003284
392	0.0013402	0	0	0	0	0.000340007
393	0.00137811	0	0	0	0	0.000356607
394	0.00141394	0	0	0	0	0.000375981
395	0.00147085	0	0	0	0	0.000393574
396	0.00156508	0	0	0	0	0.000405152
397	0.00169746	0	0	0	0	0.000408641
398	0.00185684	0	0	0	0	0.000404082
399	0.00203247	0	0	0	0	0.000391954
400	0.00222319	0	0	0	0	0.000371922
401	0.00243231	0	0	0	0	0.00034368
402	0.00265787	0	0	0	0	0.000308647
403	0.00289332	0	0	0	0	0.000270121
404	0.00313451	0	0	0	0	0.000231789
405	0.00337956	0	0	0	0	0.000196218
406	0.00362507	0	0	0	0	0.000164015
407	0.00387018	0	0	0	0	0.000133496
408	0.00412443	0	0	0	0	0.000101119
409	0.00440205	0	0	0	0	6.31221e-05
410	0.00470677	0	0	0	0	1.6979e-05
411	0.00498476	0	0	0	0	0
412	0.00523948	0	0	0	0	0
413	0.00548167	0	0	0	0	0
414	0.00569167	0	0	0	0	0
415	0.0058366	0	0	0	0	0
416	0.00589454	0	0	0	0	0
417	0.00587756	0	0	0	0	0
418	0.00581989	0	0	0	0	0
419	0.00574395	7.88061e-06	2.04766e-05	0	0	0
420	0.00562278	5.68858e-05	2.54205e-05	0	6.40393e-05	0
421	0.00546974	8.71732e-05	1.76005e-05	0	0.000181313	6.05399e-06
422	0.00530781	0.00011673	3.08894e-06	0	0.000295387	3.25958e-05
423	0.00517153	0.000141022	0	0	0.000408926	5.39536e-05
424	0.00505316	0.000161433	0	0	0.000512786	7.21337e-05
425	0.00492366	0.000177226	0	0	0.000596722	9.30838e-05
426	0.00476111	0.000188285	0	0	0.000658095	0.000120549
427	0.00457473	0.000197018	0	0	0.000702446	0.000150296
428	0.00439752	0.000205166	0	0	0.000735091	0.000173677
429	0.00425427	0.000212031	0	0	0.000758428	0.000187042
430	0.00413887	0.000217152	0	0	0.000774941	0.000195183
431	0.00402781	0.000221916	0	0	0.000787031	0.000205306
432	0.00390743	0.000227577	0	0	0.000794925	0.000220698
433	0.0037809	0.000233505	0	0	0.00079653	0.00024063
434	0.00365647	0.00023793	0	0	0.000788779	0.000263396
435	0.00353587	0.000239597	0	0	0.000769369	0.000288547
436	0.00341053	0.000238624	0	0	0.000738381	0.00031778
437	0.00326694	0.000236244	0	0	0.000698623	0.00035405
438	0.00310017	0.000233542	0	0	0.000653935	0.000398187
439	0.00292563	0.000229865	0	0	0.000606622	0.000445059
440	0.00277959	0.000222307	0	0	0.000556092	0.000482856
441	0.0026945	0.000207869	0	0	0.000500646	0.000500548
442	0.00263759	0.000188041	0	0	0.000443032	0.000505752
443	0.00253792	0.000168295	0	0	0.000388823	0.000519255
444	0.00241069	0.00015106	0	0	0.000336745	0.000542605
445	0.0023064	0.000135423	0	0	0.000282896	0.000567448
446	0.00222684	0.000120453	0	0	0.000227476	0.000594142
447	0.0021603	0.000105315	0	0	0.000172021	0.000623443
448	0.00210319	8.94204e-05	0	0	0.000117761	0.000653152
449	0.00205389	7.17034e-05	3.03876e-06	0	6.57945e-05	0.000681123
450	0.00200965	5.34899e-05	6.71535e-06	0	1.73079e-05	0.000706891
451	0.0019622	2.61536e-05	6.4352e-06	0	0	0.000724288
452	0.00191672	0	1.10271e-06	0	0	0.000736151
453	0.00188385	0	0	0	0	0.000743004
454	0.00187302	0	0	0	0	0.000746333
455	0.00188128	0	0	0	0	0.000747454
456	0.00188924	0	0	0	0	0.000750031
457	0.00187096	0	0	0	0	0.00075749
458	0.00181406	0	0	0	0	0.000770191
459	0.00172963	0	0	1.3916e-05	0	0.000785475
460	0.00164213	0	0	3.92517e-05	0	0.000799867
461	0.00156844	0	0	6.30309e-05	0	0.000809795
462	0.00150944	0	0	8.02708e-05	0	0.000811252
463	0.00146039	0	0	9.06318e-05	0	0.000800789
464	0.00142187	0	0	9.9002e-05	0	0.000777032
465	0.00139859	0	0	0.000110331	0	0.000741321
466	0.00139187	0	0	0.000125734	0	0.000697742
467	0.00139762	0	0	0.000143786	0	0.000652241
468	0.00140997	0	0	0.00016318	0	0.000610341
469	0.00142388	0	0	0.000183613	0	0.000574997
470	0.00143453	0	0	0.000205462	0	0.000546126
471	0.0014369	0	0	0.000229291	0	0.000521393
472	0.00142813	0	0	0.000255442	0	0.000497309
473	0.00141083	0	0	0.000283756	0	0.000470368
474	0.00139323	0	0	0.000313604	0	0.000438216
475	0.00138416	0	0	0.000344291	0	0.000400672
476	0.00138618	0	0	0.000375622	0	0.000360167
477	0.00139223	0	0	0.000408184	0	0.000321232
478	0.00138876	0	5.69452e-06	0.000442372	0	0.000288367
479	0.00136438	0	1.02079e-05	0.000480047	0	0.000265537
480	0.00131676	0	1.29072e-05	0.000521555	0	0.000252707
481	0.00125469	0	1.4635e-05	0.000566251	0	0.000246256
482	0.00119229	0	1.63061e-05	0.000613195	0	0.000241187
483	0.00113875	0	1.87149e-05	0.000661973	0	0.000234325
484	0.00109213	0	2.23974e-05	0.000713168	0	0.000226159
485	0.00104395	0	2.7565e-05	0.000768097	0	0.0002194
486	0.000989936	0	3.4134e-05	0.000828119	0	0.000215678
487	0.000934209	2.54446e-06	4.09167e-05	0.000894109	0	0.000213872
488	0.000883816	1.0373e-05	4.67135e-05	0.000966608	0	0.000211571
489	0.000842571	1.8534e-05	5.3427e-05	0.00104628	0	0.000207326
490	0.000809852	2.74045e-05	6.11952e-05	0.00113339	0	0.000200499
491	0.000783298	3.73399e-05	7.03103e-05	0.0012281	0	0.000191172
492	0.000760363	4.85117e-05	8.11517e-05	0.00133066	0	0.000179893
493	0.000738517	6.09228e-05	9.40694e-05	0.00144194	0	0.000167564
494	0.000715357	7.44591e-05	0.000109295	0.00156369	0	0.000155254
495	0.000689127	8.89033e-05	0.00012692	0.0016985	0	0.000143906
496	0.00065922	0.000103936	0.000146938	0.00184947	0	0.000134101
497	0.000626224	0.000119161	0.000169312	0.00201981	0	0.000125957
498	0.000591401	0.00013417	0.000194029	0.00221243	0	0.000119213
499	0.00055593	0.00014857	0.000221107	0.00242979	1.20937e-07	0.000113399
500	0.000518236	0.000158532	0.000249522	0.00267431	1.01963e-05	0.000105751
501	0.000480964	0.00016807	0.000280549	0.00294695	1.89509e-05	9.86171e-05
502	0.000444127	0.00017728	0.0003142	0.00324871	2.61439e-05	9.17906e-05
503	0.000408035	0.000186288	0.000350379	0.00358013	3.17082e-05	8.49868e-05
504	0.000373489	0.000195236	0.000388865	0.00394141	3.57349e-05	7.77726e-05
505	0.000341596	0.000204285	0.000429299	0.00433267	3.84287e-05	6.95904e-05
506	0.000313366	0.000213606	0.00047117	0.0047544	4.00488e-05	5.98664e-05
507	0.00028938	0.000223353	0.000513812	0.00520801	4.08499e-05	4.81525e-05
508	0.000269687	0.000233605	0.000556389	0.00569638	4.10382e-05	3.42464e-05
509	0.00025392	0.000244294	0.000597918	0.00622414	4.0753e-05	1.8257e-05
510	0.000241417	0.000255164	0.000637295	0.00679762	4.0084e-05	6.21297e-07
511	0.000214465	0.000264672	0.000669807	0.00742404	3.28995e-05	0
512	0.000187601	0.000273268	0.000697767	0.00811237	2.54282e-05	0
513	0.000160035	0.000280364	0.000720471	0.00887142	1.86034e-05	0
514	0.000129893	0.000285315	0.000737191	0.0097096	1.32344e-05	0
515	9.54203e-05	0.000287521	0.000747233	0.0106343	1.00098e-05	0
516	5.57596e-05	0.000286506	0.000749825	0.0116508	9.25363e-06	0
517	1.1382e-05	0.000282029	0.000744055	0.0127609	1.07812e-05	0
518	0	0.000273035	0.000725719	0.0139545	3.38201e-06	0
519	0	0.000257245	0.000694262	0.0152257	0	0
520	0	0.000237543	0.000651231	0.0165599	0	0
521	0	0.000216149	0.000597655	0.0179348	0	0
522	0	0.00019337	0.00053444	0.019325	0	0
523	0	0.000169183	0.00046305	0.0207069	0	0
524	0	0.00014328	0.000385168	0.0220621	0	0
525	0	0.00011526	0.000302383	0.0233775	0	0
526	0	8.4883e-05	0.000216077	0.0246435	0	0
527	0	5.22816e-05	0.000127541	0.0258493	0	0
528	0	1.80267e-05	3.81817e-05	0.0269792	0	0
529	0	0	0	0.0280018	0	0
530	0	0	0	0.028894	0	0
531	0	0	0	0.0296368	0	0
532	0	0	0	0.0301967	0	0
533	0	0	0	0.0305251	0	0
534	0	0	0	0.0305491	0	0
535	0	0	0	0.0301726	0	0
536	0	0	0	0.0293005	0	0
537	7.52416e-05	0	0	0.0278746	0	0
538	0.000218044	0	0	0.0259779	0	0
539	0.000377359	0	0	0.0238315	0	0
540	0.000540295	0	0	0.0216828	0	0
541	0.000695216	0	0	0.0196944	0	0
542	0.0008338	0	0	0.0179039	0	0
543	0.000949924	0	0	0.0162826	0	0
544	0.00103903	0	0	0.0148049	0	0
545	0.00109956	0	0	0.0134655	0	0
546	0.0011343	0	0	0.0122626	0	0
547	0.00114969	0	0	0.0111852	0	0
548	0.00114432	0	0	0.0102146	0	7.93092e-06
549	0.00111251	0	0	0.00933249	0	3.46993e-05
550	0.00108775	0	0	0.00852804	0	5.59952e-05
551	0.00107226	0	0	0.00779297	0	7.24398e-05
552	0.00106562	0	0	0.00712131	0	8.52664e-05
553	0.00106608	0	0	0.00650778	0	9.54976e-05
554	0.00107109	7.52791e-06	0	0.0059466	0	0.000102978
555	0.00107821	2.80848e-05	0	0.00543237	0	0.000107281
556	0.00108641	4.73974e-05	0	0.00496199	0	0.000109516
557	0.00109478	6.54377e-05	0	0.00453195	0	0.000109766
558	0.00110364	8.17911e-05	0	0.00413983	0	0.000108567
559	0.00111423	9.53877e-05	0	0.00378406	7.90334e-07	0.000106693
560	0.00112694	0.000103324	0	0.00346323	8.00174e-06	0.000103693
561	0.0011437	0.000108354	0	0.00317409	1.54487e-05	0.000101182
562	0.00116295	0.000111316	0	0.00291194	2.42631e-05	9.79105e-05
563	0.00118254	0.000113205	0	0.00267215	3.53209e-05	9.25263e-05
564	0.00120159	0.000114289	0	0.00245265	4.80931e-05	8.51127e-05
565	0.00122039	0.000114127	0	0.00225395	6.03924e-05	7.73241e-05
566	0.00123859	0.000112433	0	0.00207677	6.93551e-05	7.10102e-05
567	0.00125451	0.000109605	0	0.00192024	7.28277e-05	6.69971e-05
568	0.00126648	0.000106421	0	0.00178198	7.02908e-05	6.49877e-05
569	0.00127463	0.000103456	0	0.00165925	6.2983e-05	6.40725e-05
570	0.0012814	0.000100842	0	0.00154963	5.32319e-05	6.31866e-05
571	0.00129072	9.83946e-05	0	0.0014512	4.33576e-05	6.13762e-05
572	0.00130692	9.58255e-05	0	0.00136254	3.47881e-05	5.79261e-05
573	0.00133391	9.28869e-05	0	0.00128253	2.78177e-05	5.23706e-05
574	0.00137463	8.94243e-05	0	0.00121026	2.19202e-05	4.44563e-05
575	0.00143056	8.53881e-05	0	0.00114485	1.62432e-05	3.41495e-05
576	0.00150128	8.08372e-05	0	0.00108552	9.99704e-06	2.17153e-05
577	0.00158419	7.59336e-05	0	0.0010316	2.65793e-06	7.78006e-06
578	0.00166442	6.59909e-05	0	0.000982448	0	0
579	0.00173744	5.20475e-05	0	0.000937518	0	0
580	0.0018102	3.8247e-05	0	0.000896577	0	0
581	0.00188089	2.48962e-05	0	0.000859057	0	0
582	0.00194881	1.21142e-05	0	0.000824319	0	0
583	0.0020136	0	0	0.000791767	0	0
584	0.00207279	0	0	0.000759959	0	0
585	0.00212668	0	0	0.000729828	0	0
586	0.00217371	0	0	0.000701342	0	0
587	0.0022132	0	0	0.000674446	0	0
588	0.00224594	0	0	0.000648933	0	0
589	0.00227398	0	0	0.000624464	0	0
590	0.00229966	0	0	0.000600711	0	0
591	0.00232424	0	0	0.000577568	0	0
592	0.00234711	0	0	0.000555262	0	0
593	0.00236605	0	0	0.000534311	0	0
594	0.00237849	0	0	0.000515296	0	0
595	0.0023831	0	0	0.000498585	0	0
596	0.00238085	0	0	0.000484139	0	0
597	0.00237502	0	0	0.000471508	0	0
598	0.00237016	0	0	0.000459997	0	0
599	0.0023706	0	0	0.000448905	0	0
600	0.00237935	0	0	0.000437722	0	0
601	0.00239749	0	0	0.000426207	0	0
602	0.00242442	0	0	0.000414367	0	0
603	0.00245834	0	0	0.000402384	0	0
604	0.00249687	0	0	0.000390533	0	0
605	0.00253754	0	0	0.000379146	0	0
606	0.00257809	0	0	0.000368584	0	0
607	0.00261672	0	0	0.000359201	0	0
608	0.00265228	0	0	0.000351253	0	0
609	0.00268463	0	0	0.000344728	0	0
610	0.00271487	0	0	0.000339156	0	0
611	0.00274502	0	0	0.000333555	0	0
612	0.00277656	0	0	0.000326743	0	0
613	0.00280762	0	0	0.000318054	0	0
614	0.00283079	0	0	0.000308075	0	0
615	0.00283402	0	0	0.000298728	0	0
616	0.00280614	0	0	0.000292277	0	0
617	0.00274408	0	0	0.000289777	0	0
618	0.00265653	0	0	0.000290147	0	0
619	0.00256054	0	0	0.000290676	0	0
620	0.0024733	0	0	0.000288616	0	0
621	0.00240513	0	0	0.000282627	0	0
622	0.00235725	0	0	0.000273118	0	0
623	0.00232399	0	0	0.000261518	0	0
624	0.00229624	0	0	0.000249239	0	0
625	0.00226433	0	0	0.000237171	0	0
626	0.00222037	0	0	0.000225923	0	0
627	0.0021603	0	0	0.000216285	0	0
628	0.00208497	0	0	0.000209283	0	0
629	0.00199941	0	0	0.000205647	0	0
630	0.00191075	0	0	0.00020521	0	0
631	0.0018259	0	0	0.000206746	0	0
632	0.00175005	0	0	0.000208359	0	0
633	0.00168622	0	0	0.000208105	0	0
634	0.00163542	0	0	0.000204568	0	0
635	0.001597	0	0	0.000197229	0	0
636	0.00156896	0	0	0.000186555	0	0
637	0.00154813	0	0	0.000173784	0	0
638	0.00153057	0	0	0.000160471	0	0
639	0.00151226	0	0	0.000147999	0	0
640	0.00149004	0	0	0.000137242	0	0
641	0.00146227	0	0	0.000128488	0	0
642	0.00142886	0	0	0.000121598	0	0
643	0.00139079	0	0	0.000116244	0	0
644	0.00134934	0	0	0.000112127	0	0
645	0.00130553	0	0	0.000109075	0	0
646	0.00125999	0	0	0.000107035	0	0
647	0.0012132	0	0	0.000105996	0	0
648	0.00116577	0	0	0.000105896	0	0
649	0.00111855	0	0	0.00010658	0	0
650	0.00107263	0	0	0.000107788	0	0
651	0.00102894	0	0	0.000109186	0	0
652	0.00098799	0	0	0.000110407	0	0
653	0.000949614	0	0	0.000111096	0	0
654	0.000913036	0	0	0.000110948	0	0
655	0.000873472	2.80388e-06	0	0.000109378	5.87285e-06	0
656	0.000832401	2.19731e-06	0	0.000106896	1.52875e-05	0
657	0.000792415	4.37436e-07	0	0.000103429	2.28608e-05	0
658	0.000753721	0	0	9.88913e-05	2.84415e-05	0
659	0.000716946	0	0	9.35651e-05	3.26674e-05	0
660	0.000682749	0	0	8.77104e-05	3.60445e-05	0
661	0.000651682	0	0	8.15128e-05	3.87987e-05	0
662	0.000624183	0	0	7.50833e-05	4.09334e-05	0
663	0.000600522	0	0	6.84583e-05	4.23263e-05	0
664	0.00058057	0	0	6.16448e-05	4.28974e-05	0
665	0.000563465	0	0	5.46966e-05	4.27651e-05	0
666	0.000547493	0	0	4.77752e-05	4.23006e-05	0
667	0.000530493	0	0	4.11503e-05	4.20156e-05	0
668	0.000510767	0	0	3.51282e-05	4.2324e-05	0
669	0.000487923	0	0	2.9952e-05	4.33247e-05	0
670	0.000463037	0	0	2.57366e-05	4.4762e-05	0
671	0.000436642	0	0	2.23894e-05	4.56454e-05	1.42571e-06
672	0.000409854	0	0	1.9789e-05	4.53526e-05	4.89656e-06
673	0.000385732	0	0	1.79596e-05	4.46003e-05	8.11156e-06
674	0.000364327	0	0	1.67999e-05	4.34545e-05	1.10407e-05
675	0.000345063	0	0	1.62104e-05	4.20427e-05	1.38059e-05
676	0.000327267	0	0	1.60996e-05	4.04908e-05	1.65536e-05
677	0.000310459	0	0	1.63903e-05	3.88878e-05	1.93817e-05
678	0.000294406	0	0	1.7023e-05	3.72794e-05	2.23264e-05
679	0.000279047	0	0	1.7956e-05	3.56787e-05	2.5378e-05
680	0.000264415	0	0	1.91594e-05	3.40807e-05	2.85015e-05
681	0.00025058	0	0	2.06081e-05	3.24727e-05	3.16488e-05
682	0.000237626	0	0	2.22742e-05	3.08402e-05	3.47651e-05
683	0.000225637	0	0	2.41228e-05	2.91692e-05	3.77912e-05
684	0.000214692	0	0	2.61096e-05	2.74454e-05	4.06642e-05
685	0.00020486	0	0	2.81823e-05	2.56553e-05	4.33196e-05
686	0.000196199	0	0	3.02823e-05	2.37871e-05	4.56938e-05
687	0.000188769	0	0	3.23491e-05	2.18345e-05	4.7726e-05
688	0.000182661	0	0	3.4324e-05	1.98014e-05	4.93581e-05
689	0.000178048	0	0	3.61527e-05	1.77068e-05	5.05293e-05
690	0.000175281	0	0	3.77851e-05	1.55852e-05	5.11629e-05
691	0.000174979	0	0	3.91688e-05	1.34781e-05	5.1146e-05
692	0.0001781	0	0	4.02372e-05	1.14116e-05	5.03091e-05
693	0.000185867	0	0	4.0897e-05	9.36227e-06	4.84226e-05
694	0.000199483	0	0	4.10269e-05	7.22733e-06	4.52339e-05
695	0.00021958	0	0	4.05045e-05	4.82663e-06	4.05633e-05
696	0.000245547	0	0	3.92656e-05	1.96012e-06	3.4447e-05
697	0.000274658	0	0	3.738e-05	0	2.68614e-05
698	0.000302597	0	0	3.51069e-05	0	1.83249e-05
699	0.000324933	0	0	3.28797e-05	0	1.0542e-05
700	0.000337274	0	0	3.11885e-05	0	4.71638e-06
701	0.000337185	0	0	3.04205e-05	0	1.709e-06
702	0.000325001	0	0	3.07202e-05	0	1.74365e-06
703	0.000303633	0	0	3.19471e-05	0	4.35395e-06
704	0.000277477	0	0	3.37489e-05	0	8.59208e-06
705	0.000250962	0	0	3.57054e-05	0	1.33827e-05
706	0.000227382	0	0	3.74686e-05	0	1.78489e-05
707	0.000208398	0	0	3.88407e-05	0	2.1486e-05
708	0.000194196	0	0	3.97778e-05	0	2.41606e-05
709	0.000184016	0	0	4.03435e-05	0	2.59964e-05
710	0.000176739	0	0	4.0651e-05	0	2.72322e-05
711	0.000171297	0	0	4.08183e-05	0	2.81128e-05
712	0.000166875	0	0	4.09453e-05	0	2.88306e-05
713	0.00016295	0	0	4.11084e-05	0	2.95101e-05
714	0.000159215	0	9.96576e-07	4.12365e-05	0	3.01234e-05
715	0.000155595	0	2.16773e-06	4.14734e-05	0	3.0767e-05
716	0.000152104	0	3.31163e-06	4.18718e-05	0	3.14519e-05
717	0.000148812	0	4.42035e-06	4.24487e-05	0	3.21565e-05
718	0.000145755	0	5.43321e-06	4.32172e-05	2.18515e-07	3.27979e-05
719	0.00014294	0	6.26664e-06	4.41825e-05	9.75698e-07	3.32691e-05
720	0.000140573	0	7.07143e-06	4.531e-05	1.65245e-06	3.37098e-05
721	0.000138676	0	7.84688e-06	4.65728e-05	2.25437e-06	3.41096e-05
722	0.000137224	0	8.59325e-06	4.79331e-05	2.79311e-06	3.4467e-05
723	0.000136154	0	9.3116e-06	4.93441e-05	3.28513e-06	3.47897e-05
724	0.000135363	0	1.00036e-05	5.07519e-05	3.7501e-06	3.50931e-05
725	0.000134722	0	1.06714e-05	5.20985e-05	4.20897e-06	3.53985e-05
726	0.000134089	0	1.13168e-05	5.33244e-05	4.68185e-06	3.57299e-05
727	0.000133324	0	1.19416e-05	5.43728e-05	5.18602e-06	3.61105e-05
728	0.000132305	0	1.25466e-05	5.51928e-05	5.73401e-06	3.65599e-05
729	0.000130943	0	1.31318e-05	5.5742e-05	6.33206e-06	3.70903e-05
730	0.000129193	0	1.3696e-05	5.59895e-05	6.97898e-06	3.77039e-05
731	0.000127065	0	1.42367e-05	5.59174e-05	7.66549e-06	3.83916e-05
732	0.000124627	0	1.47505e-05	5.55207e-05	8.37402e-06	3.9131e-05
733	0.000122004	0	1.52333e-05	5.48078e-05	9.07908e-06	3.9887e-05
734	0.000119376	0	1.56807e-05	5.37981e-05	9.74789e-06	4.06124e-05
735	0.000116967	0	1.60887e-05	5.25204e-05	1.03415e-05	4.12495e-05
736	0.000115036	0	1.64538e-05	5.10103e-05	1.08164e-05	4.17324e-05
737	0.000113863	0	1.67739e-05	4.93072e-05	1.11258e-05	4.19906e-05
738	0.000113729	0	1.7048e-05	4.74523e-05	1.12222e-05	4.19528e-05
739	0.000114901	0	1.72765e-05	4.54865e-05	1.10596e-05	4.15513e-05
740	0.000117614	0	1.74601e-05	4.34496e-05	1.05959e-05	4.07281e-05
741	0.000122048	0	1.75998e-05	4.13801e-05	9.79635e-06	3.944e-05
742	0.00012831	0	1.76954e-05	3.93162e-05	8.6361e-06	3.76647e-05
743	0.000136419	0	1.77446e-05	3.72965e-05	7.10338e-06	3.54065e-05
744	0.00014629	0	1.77421e-05	3.53622e-05	5.20179e-06	3.27001e-05
745	0.000157731	0	1.76786e-05	3.35574e-05	2.95195e-06	2.96133e-05
746	0.000170447	0	1.75407e-05	3.19302e-05	3.91798e-07	2.6246e-05
747	0.000183466	0	1.67133e-05	3.06038e-05	0	2.21073e-05
748	0.000196776	0	1.56322e-05	2.95751e-05	0	1.78182e-05
749	0.000209999	0	1.43933e-05	2.88785e-05	0	1.36582e-05
750	0.00022268	0	1.29987e-05	2.8552e-05	0	9.80303e-06
751	0.000234422	0	1.14547e-05	2.86195e-05	0	6.40774e-06
752	0.000244934	0	9.77338e-06	2.90845e-05	0	3.58825e-06
753	0.000254078	0	7.97385e-06	2.99244e-05	0	1.40487e-06
754	0.000261728	0	6.03207e-06	3.10832e-05	0	0
755	0.000267327	0	3.74306e-06	3.24616e-05	0	0
756	0.000272698	0	1.57184e-06	3.39689e-05	0	0
757	0.0002781	0	0	3.53929e-05	0	0
758	0.000283762	0	0	3.64403e-05	0	0
759	0.000290242	0	0	3.71564e-05	0	0
760	0.000297787	0	0	3.74001e-05	0	0
761	0.000306474	0	0	3.70743e-05	0	0
762	0.000316149	0	0	3.61466e-05	0	0
763	0.000326393	0	0	3.46618e-05	0	0
764	0.000336533	0	0	3.27438e-05	0	0
765	0.000345704	0	0	3.05842e-05	0	0
766	0.000352964	0	0	2.84171e-05	0	0
767	0.000357435	0	0	2.64848e-05	0	0
768	0.000358457	0	0	2.50003e-05	0	0
769	0.000355705	0	0	2.41147e-05	0	0
770	0.000349258	0	0	2.38957e-05	0	0
771	0.000339581	0	0	2.43239e-05	0	0
772	0.000327457	0	0	2.53037e-05	0	0
773	0.00031385	0	0	2.6688e-05	0	0
774	0.000292312	0	0	2.78925e-05	0	6.38978e-06
775	0.000270704	0	0	2.91447e-05	0	1.32053e-05
776	0.000251022	0	0	3.03853e-05	0	1.93492e-05
777	0.000233991	0	0	3.15392e-05	0	2.46123e-05
778	0.000219936	0	0	3.25669e-05	0	2.89202e-05
779	0.000208843	0	0	3.34604e-05	0	3.23108e-05
780	0.000200428	0	0	3.42375e-05	0	3.48991e-05
781	0.000194225	0	0	3.49341e-05	0	3.68398e-05
782	0.000189649	0	0	3.55986e-05	0	3.82954e-05
783	0.000186066	0	0	3.62851e-05	0	3.9414e-05
784	0.000182846	0	0	3.70469e-05	0	4.0318e-05
785	0.000179434	0	0	3.79283e-05	0	4.11017e-05
786	0.000175406	0	0	3.89566e-05	0	4.18355e-05
787	0.000170522	0	0	4.01361e-05	0	4.25703e-05
788	0.000164746	0	0	4.14463e-05	0	4.33415e-05
789	0.000158224	0	0	4.28454e-05	0	4.4169e-05
790	0.000151239	0	0	4.42779e-05	0	4.50568e-05
791	0.000144132	0	0	4.56848e-05	0	4.59927e-05
792	0.000137237	0	0	4.70127e-05	0	4.69514e-05
793	0.000130819	0	0	4.82192e-05	0	4.79009e-05
794	0.00012505	0	0	4.92758e-05	0	4.88104e-05
795	0.00012	0	0	5.01666e-05	0	4.96574e-05
796	0.00011566	0	0	5.08856e-05	0	5.04326e-05
797	0.000111961	0	0	5.14344e-05	0	5.11401e-05
798	0.000108804	0	0	5.18188e-05	0	5.17952e-05
799	0.000106086	0	0	5.20475e-05	0	5.24193e-05
800	0.000103719	0	0	5.21309e-05	0	5.3035e-05
801	0.000101635	0	0	5.20794e-05	0	5.36611e-05
802	9.97826e-05	0	5.86599e-07	5.18286e-05	0	5.42543e-05
803	9.814e-05	0	2.48502e-06	5.12949e-05	0	5.47485e-05
804	9.67735e-05	0	4.61731e-06	5.06202e-05	0	5.52333e-05
805	9.57519e-05	0	6.93527e-06	4.98123e-05	0	5.56903e-05
806	9.51749e-05	0	9.36369e-06	4.88776e-05	0	5.60914e-05
807	9.51681e-05	0	1.18018e-05	4.78215e-05	0	5.63997e-05
808	9.58748e-05	0	1.41284e-05	4.6648e-05	0	5.65722e-05
809	9.74448e-05	0	1.62101e-05	4.53605e-05	0	5.65625e-05
810	0.000100019	0	1.79137e-05	4.39632e-05	0	5.63251e-05
811	0.00010371	0	1.91193e-05	4.24618e-05	0	5.58207e-05
812	0.000108586	0	1.97341e-05	4.08654e-05	0	5.50213e-05
813	0.000114657	0	1.97039e-05	3.91873e-05	0	5.3914e-05
814	0.000121863	0	1.90211e-05	3.74464e-05	0	5.25039e-05
815	0.00013008	0	1.77271e-05	3.56657e-05	0	5.08129e-05
816	0.000139133	0	1.59091e-05	3.38714e-05	0	4.88758e-05
817	0.000148825	0	1.36916e-05	3.20901e-05	0	4.67336e-05
818	0.00015897	0	1.12236e-05	3.03448e-05	0	4.44234e-05
819	0.000169425	0	8.66413e-06	2.86524e-05	0	4.19699e-05
820	0.000180121	0	6.16847e-06	2.70203e-05	0	3.93774e-05
821	0.000191067	0	3.87616e-06	2.54458e-05	0	3.66271e-05
822	0.000202346	0	1.90328e-06	2.39169e-05	0	3.3679e-05
823	0.000214081	0	3.38603e-07	2.24156e-05	0	3.04808e-05
824	0.000226368	0	0	2.08269e-05	0	2.69102e-05
825	0.000239301	0	0	1.9253e-05	0	2.30166e-05
826	0.000252854	0	0	1.77333e-05	0	1.88279e-05
827	0.000266862	0	0	1.62754e-05	0	1.43821e-05
828	0.000281018	0	0	1.49006e-05	0	9.76602e-06
829	0.000294845	0	1.21808e-06	1.3489e-05	0	5.00371e-06
830	0.000307827	0	2.86798e-06	1.2186e-05	0	3.49511e-07
831	0.000314934	0	3.41245e-06	1.09898e-05	0	0
832	0.00032026	0	4.15363e-06	1.00551e-05	0	0
833	0.000323907	0	5.16289e-06	9.46203e-06	0	0
834	0.00032565	0	6.3845e-06	9.27435e-06	0	0
835	0.000325358	0	7.75726e-06	9.53911e-06	0	0
836	0.000323004	0	9.21828e-06	1.02804e-05	0	0
837	0.000318679	0	1.07066e-05	1.1495e-05	0	0
838	0.000312594	0	1.21658e-05	1.31504e-05	0	0
839	0.00030507	0	1.35463e-05	1.51864e-05	0	0
840	0.000293958	0	1.40333e-05	1.74738e-05	0	2.28716e-06
841	0.000278271	0	1.3156e-05	1.98877e-05	0	8.16042e-06
842	0.000262112	0	1.19873e-05	2.23884e-05	0	1.4388e-05
843	0.000246242	0	1.06104e-05	2.48798e-05	0	2.07001e-05
844	0.000231318	0	9.1096e-06	2.72767e-05	0	2.68617e-05
845	0.000217845	0	7.56359e-06	2.95111e-05	0	3.26893e-05
846	0.000206146	0	6.0412e-06	3.15349e-05	0	3.806e-05
847	0.000196359	0	4.59865e-06	3.33206e-05	0	4.29109e-05
848	0.000188451	0	3.27849e-06	3.48592e-05	0	4.72319e-05
849	0.000182253	0	2.10992e-06	3.61568e-05	0	5.10539e-05
850	0.000177501	0	1.10999e-06	3.72298e-05	0	5.44344e-05
851	0.000173882	0	2.85456e-07	3.8101e-05	0	5.74447e-05
852	0.000171066	0	0	3.87479e-05	0	6.01241e-05
853	0.000168775	0	0	3.92242e-05	0	6.25629e-05
854	0.000166793	0	0	3.95826e-05	0	6.48434e-05
855	0.000164975	0	0	3.98343e-05	0	6.70092e-05
856	0.000163255	0	0	3.99849e-05	0	6.90928e-05
857	0.000161647	0	0	4.00357e-05	0	7.11173e-05
858	0.000160222	0	0	3.99854e-05	0	7.31002e-05
859	0.000159092	0	0	3.98315e-05	0	7.50562e-05
860	0.000158387	0	0	3.95718e-05	0	7.69994e-05
861	0.000158225	0	3.85829e-07	3.91568e-05	0	7.89095e-05
862	0.000158712	0	1.22041e-06	3.85803e-05	0	8.07978e-05
863	0.000159935	0	2.25027e-06	3.78792e-05	0	8.27072e-05
864	0.000161928	0	3.48393e-06	3.70609e-05	0	8.46576e-05
865	0.000164678	0	4.91842e-06	3.6139e-05	0	8.66705e-05
866	0.000168113	0	6.53564e-06	3.51354e-05	0	8.87681e-05
867	0.000172105	0	8.30077e-06	3.40813e-05	0	9.09729e-05
868	0.000176461	0	1.01632e-05	3.30177e-05	0	9.33061e-05
869	0.000180941	0	1.20602e-05	3.19945e-05	0	9.57864e-05
870	0.000185265	0	1.39232e-05	3.10673e-05	0	9.8429e-05
871	0.00018914	0	1.5685e-05	3.02922e-05	0	0.000101244
872	0.000192295	0	1.72874e-05	2.97187e-05	0	0.000104238
873	0.000194509	0	1.86868e-05	2.93835e-05	0	0.00010741
874	0.000195649	0	1.98575e-05	2.93033e-05	0	0.000110756
875	0.000195682	0	2.07914e-05	2.94722e-05	0	0.000114269
876	0.000194692	0	2.14951e-05	2.98602e-05	0	0.000117941
877	0.000192864	0	2.19853e-05	3.04169e-05	0	0.000121763
878	0.000190463	0	2.22831e-05	3.10775e-05	0	0.000125725
879	0.0001878	0	2.24096e-05	3.17706e-05	0	0.000129818
880	0.000185198	0	2.2383e-05	3.24265e-05	0	0.00013403
881	0.000182958	0	2.22175e-05	3.29842e-05	0	0.000138347
882	0.000181338	0	2.19244e-05	3.33959e-05	0	0.000142753
883	0.000180541	0	2.15136e-05	3.3629e-05	0	0.000147225
884	0.000180719	0	2.09958e-05	3.36649e-05	0	0.000151737
885	0.000181981	0	2.03841e-05	3.34969e-05	0	0.000156258
886	0.000184406	0	1.96945e-05	3.3126e-05	0	0.000160756
887	0.000188059	0	1.89461e-05	3.25583e-05	0	0.000165196
888	0.000192997	0	1.81598e-05	3.18024e-05	0	0.000169545
889	0.000199267	0	1.73568e-05	3.08682e-05	0	0.000173767
890	0.000206908	0	1.65572e-05	2.97675e-05	0	0.000177833
891	0.000215931	0	1.57784e-05	2.85147e-05	0	0.000181717
892	0.000226311	0	1.50341e-05	2.71288e-05	0	0.000185402
893	0.000237965	0	1.43336e-05	2.56344e-05	0	0.000188885
894	0.000250745	0	1.36821e-05	2.40627e-05	0	0.000192182
895	0.000264426	0	1.30807e-05	2.24517e-05	0	0.000195334
896	0.000278706	0	1.25274e-05	2.08453e-05	0	0.00019841
897	0.000293213	0	1.20184e-05	1.92915e-05	0	0.000201509
898	0.000307517	0	1.15487e-05	1.78406e-05	0	0.000204757
899	0.00032116	0	1.11142e-05	1.65422e-05	0	0.000208297
900	0.000333675	0	1.07121e-05	1.54431e-05	0	0.000212283
901	0.000344624	0	1.03422e-05	1.45842e-05	0	0.000216863
902	0.000353627	0	1.00072e-05	1.39987e-05	0	0.000222164
903	0.00036039	0	9.71268e-06	1.37102e-05	0	0.00022828
904	0.000364726	0	9.46701e-06	1.37309e-05	0	0.000235263
905	0.000366565	0	9.28029e-06	1.40614e-05	0	0.000243118
906	0.000365962	0	9.16344e-06	1.46903e-05	0	0.000251804
907	0.000363083	0	9.12683e-06	1.55943e-05	0	0.000261238
908	0.000358193	0	9.17898e-06	1.67396e-05	0	0.000271311
909	0.000351635	0	9.32527e-06	1.80834e-05	0	0.000281893
910	0.000343802	0	9.5669e-06	1.95758e-05	0	0.000292854
911	0.00033511	0	9.90017e-06	2.11626e-05	0	0.00030407
912	0.00032597	0	1.03163e-05	2.27882e-05	0	0.000315437
913	0.000316763	0	1.08016e-05	2.43988e-05	0	0.000326874
914	0.000307819	0	1.13385e-05	2.59456e-05	0	0.000338325
915	0.0002994	0	1.19058e-05	2.73877e-05	0	0.000349762
916	0.000291688	0	1.24808e-05	2.86939e-05	0	0.000361179
917	0.00028479	0	1.30394e-05	2.98439e-05	0	0.000372588
918	0.000278741	0	1.35571e-05	3.08276e-05	0	0.000384017
919	0.000273526	0	1.40093e-05	3.1643e-05	0	0.000395503
920	0.000269102	0	1.43711e-05	3.22933e-05	0	0.000407087
921	0.000265431	0	1.46179e-05	3.2783e-05	0	0.000418809
922	0.000262515	0	1.47257e-05	3.31133e-05	0	0.000430699
923	0.000260424	0	1.46718e-05	3.32789e-05	0	0.000442763
924	0.000259335	0	1.44372e-05	3.32643e-05	0	0.000454978
925	0.000259548	0	1.40081e-05	3.30415e-05	0	0.000467268
926	0.000261511	0	1.33782e-05	3.25682e-05	0	0.000479501
927	0.00026583	0	1.25496e-05	3.17867e-05	0	0.000491473
928	0.000273262	0	1.15328e-05	3.06245e-05	0	0.000502916
929	0.000284688	0	1.03457e-05	2.89967e-05	0	0.000513504
930	0.000301059	0	9.01133e-06	2.68137e-05	0	0.000522872
931	0.000323285	0	7.55625e-06	2.39931e-05	0	0.000530645
932	0.000352105	0	6.00861e-06	2.04787e-05	0	0.000536472
933	0.000387919	0	4.39614e-06	1.6261e-05	0	0.000540066
934	0.000430641	0	2.74164e-06	1.13953e-05	0	0.000541255
935	0.000479594	0	1.05465e-06	6.01123e-06	0	0.000540042
936	0.00053346	0	0	2.23889e-07	0	0.000536604
937	0.000590102	0	0	0	0	0.000531382
938	0.000647428	0	0	0	0	0.000525303
939	0.000702763	0	0	0	0	0.000519389
940	0.000753313	0	0	0	0	0.000514762
941	0.000796473	0	0	0	0	0.000512486
942	0.000830189	0	0	0	0	0.0005134
943	0.000853313	0	0	0	0	0.000517977
944	0.000865852	0	0	0	0	0.000526252
945	0.000869009	0	0	0	0	0.00053784
946	0.000864965	0	0	0	0	0.000552028
947	0.000856456	0	0	0	0	0.000567933
948	0.000846243	0	0	0	0	0.000584679
949	0.00083662	0	0	0	0	0.000601552
950	0.000829079	0	0	0	0	0.000618087
951	0.000824191	0	0	0	0	0.000634095
952	0.000821701	0	0	0	0	0.000649607
953	0.000820709	0	0	1.81873e-06	0	0.000664787
954	0.000820207	0	0	3.87277e-06	0	0.000679864
955	0.000819192	0	0	5.84992e-06	0	0.000695044
956	0.000816938	0	0	7.84966e-06	0	0.000710468
957	0.000813132	0	0	9.92178e-06	0	0.000726211
958	0.000807877	0	0	1.20631e-05	0	0.000742291
959	0.000801606	0	0	1.42273e-05	0	0.000758685
960	0.000794949	0	0	1.63431e-05	0	0.000775349
961	0.000788587	0	0	1.83334e-05	0	0.000792224
962	0.000783142	0	0	2.01303e-05	0	0.000809253
963	0.000779111	0	0	2.16827e-05	0	0.000826385
964	0.000776838	0	0	2.29578e-05	0	0.000843588
965	0.000776524	0	0	2.39374e-05	0	0.000860852
966	0.000778255	0	0	2.46117e-05	0	0.000878197
967	0.000782032	0	0	2.49743e-05	0	0.00089567
968	0.000787796	0	0	2.50186e-05	0	0.000913348
969	0.000795434	0	0	2.47391e-05	0	0.000931323
970	0.000804769	0	0	2.41361e-05	0	0.000949694
971	0.000815548	0	0	2.32231e-05	0	0.000968544
972	0.000827424	0	0	2.20315e-05	0	0.000987932
973	0.000839983	0	0	2.06109e-05	0	0.00100789
974	0.00085279	0	0	1.90201e-05	0	0.00102842
975	0.000865475	0	0	1.73131e-05	0	0.00104955
976	0.000877796	0	0	1.55256e-05	0	0.00107128
977	0.000889672	0	0	1.36701e-05	0	0.00109368
978	0.000901153	0	0	1.17406e-05	0	0.00111681
979	0.000912349	0	0	9.72552e-06	0	0.00114072
980	0.000923358	0	0	7.62198e-06	0	0.00116544
981	0.000934214	0	0	5.44284e-06	0	0.00119098
982	0.000944884	0	0	3.21609e-06	0	0.00121729
983	0.000955285	0	0	9.77323e-07	0	0.00124432
984	0.000965274	0	0	0	0	0.00127199
985	0.000974786	0	0	0	0	0.00130026
986	0.000983807	0	0	0	0	0.00132907
987	0.000992291	0	0	0	0	0.00135842
988	0.00100018	0	0	0	0	0.00138828
989	0.00100739	0	0	0	0	0.00141864
990	0.0010138	0	0	0	0	0.0014495
991	0.00101923	0	0	0	0	0.00148083
992	0.00102355	0	0	0	0	0.00151258
993	0.00102665	0	0	0	0	0.00154471
994	0.00102855	0	0	0	0	0.00157718
995	0.00102936	0	0	0	0	0.00160993
996	0.00102935	0	0	0	0	0.00164297
997	0.00102884	0	0	0	0	0.00167628
998	0.00102816	0	0	0	0	0.00170993
999	0.00102753	0	0	0	0	0.00174401
1000	0.00102705	0	0	0	0	0.00177864
1001	0.00102656	0	0	0	0	0.00181402
1002	0.00102572	0	0	0	0	0.00185035
1003	0.00102401	0	0	0	0	0.00188786
1004	0.00102081	0	0	0	0	0.00192678
1005	0.00101551	0	0	0	0	0.00196729
1006	0.00100764	0	0	0	0	0.00200947
1007	0.000996977	0	0	0	0	0.00205329
1008	0.000983612	0	0	0	0	0.00209856
1009	0.000968019	0	0	0	0	0.00214493
1010	0.000951014	0	0	0	0	0.00219193
1011	0.000933684	0	0	0	0	0.00223899
1012	0.000917259	0	0	0	0	0.0022855
1013	0.000902967	0	0	0	0	0.00233088
1014	0.000891881	0	0	0	0	0.00237468
1015	0.000884795	0	0	0	0	0.00241655
1016	0.000882142	0	0	0	0	0.00245634
1017	0.000883955	0	0	0	0	0.0024941
1018	0.000889875	0	0	0	0	0.00253002
1019	0.000899186	0	0	0	0	0.00256441
1020	0.000910881	0	0	0	0	0.00259771
1021	0.000923736	0	0	0	0	0.00263037
1022	0.000936392	0	0	0	0	0.00266282
1023	0.000947445	0	0	0	0	0.00269548
1024	0.000955538	0	0	0	0	0.00272869
1025	0.000959463	0	0	0	0	0.00276268
1026	0.000958256	0	0	0	0	0.00279759
1027	0.000951287	0	0	0	0	0.00283346
1028	0.000938322	0	0	0	0	0.00287022
1029	0.000919553	0	0	0	0	0.00290774
1030	0.000895583	0	0	0	0	0.00294579
1031	0.000867366	0	0	0	0	0.00298411
1032	0.000836106	0	0	0	0	0.00302244
1033	0.000803123	0	0	0	0	0.00306049
1034	0.000769713	0	0	0	0	0.00309803
1035	0.000737002	0	0	0	0	0.00313486
1036	0.000705831	0	0	0	0	0.00317085
1037	0.000676684	0	0	0	0	0.00320594
1038	0.000649685	0	0	0	0	0.00324013
1039	0.00062467	0	0	0	0	0.00327346
1040	0.000601304	0	0	6.67242e-07	0	0.00330603
1041	0.000579301	0	0	1.95606e-06	0	0.00333791
1042	0.000558536	0	0	3.53685e-06	0	0.00336919
1043	0.000539058	0	0	5.58964e-06	0	0.00339987
1044	0.000521059	0	0	8.15574e-06	0	0.00342987
1045	0.000504737	0	0	1.1064e-05	0	0.00345904
1046	0.000490136	0	0	1.39122e-05	0	0.00348713
1047	0.000477034	0	0	1.61343e-05	0	0.00351391
1048	0.000464904	0	0	1.715e-05	0	0.00353923
1049	0.000452974	0	0	1.65474e-05	0	0.00356314
1050	0.000440339	0	0	1.42255e-05	0	0.00358591
1051	0.000426087	0	0	1.04293e-05	0	0.00360803
1052	0.000409412	0	0	5.66178e-06	0	0.00363011
1053	0.000389692	0	0	5.15293e-07	0	0.00365274
1054	0.000366344	0	0	0	0	0.00367633
1055	0.000339409	0	0	0	0	0.00370111
1056	0.000309007	0	0	0	0	0.00372705
1057	0.000275449	0	0	0	0	0.00375388
1058	0.000239207	0	0	0	0	0.00378121
1059	0.000200856	0	0	0	0	0.00380862
1060	0.000161007	0	0	0	0	0.00383565
1061	0.000120236	0	0	0	0	0.00386193
1062	7.90425e-05	0	0	0	0	0.00388715
1063	3.78263e-05	0	0	0	0	0.00391105
1064	0	0	0	0	0	0.00393243
1065	0	0	0	0	0	0.00393949
1066	0	0	0	0	0	0.00394518
1067	0	0	0	0	0	0.0039496
1068	0	0	0	0	0	0.00395285
1069	0	0	0	0	0	0.00395505
1070	0	0	0	0	0	0.00395632
1071	0	0	0	0	0	0.00395675
1072	0	0	0	0	0	0.0039564
1073	0	0	0	0	0	0.00395527
1074	0	0	0	0	0	0.0039534
1075	0	0	0	0	0	0.00395078
1076	0	0	0	0	0	0.00394741
1077	0	0	0	0	0	0.00394322
1078	0	0	0	0	0	0.00393801
1079	0	0	0	0	0	0.00393136
1080	0	3.9546e-07	0	0	0	0.00392265
1081	0	6.07071e-06	0	0	0	0.00391067
1082	0	8.91849e-06	0	0	0	0.0038957
1083	0	8.56209e-06	0	0	0	0.00387751
1084	0	5.40378e-06	0	0	0	0.00385621
1085	0	5.14413e-07	0	0	0	0.00383219
1086	0	0	0	0	0	0.00380554
1087	0	0	0	0	0	0.0037774
1088	0	0	0	0	0	0.0037484
1089	0	0	0	0	0	0.00371893
1090	0	0	0	0	0	0.0036892
1091	0	0	0	0	0	0.00365937
1092	0	0	0	0	0	0.00362954
1093	0	1.83704e-06	0	0	0	0.00359961
1094	0	7.68044e-06	0	0	0	0.00356945
1095	0	1.42082e-05	0	0	0	0.00353946
1096	0	2.1475e-05	0	0	0	0.00350962
1097	0	2.76573e-05	5.18998e-06	0	0	0.00347952
1098	0	3.4359e-05	1.14636e-05	0	0	0.00344931
1099	0	4.19917e-05	1.78523e-05	0	0	0.00341895
1100	0	5.05719e-05	2.43267e-05	0	0	0.00338835
1101	0	6.00683e-05	3.08492e-05	0	0	0.00335749
1102	0	7.04072e-05	3.73749e-05	0	0	0.0033264
1103	0	8.14837e-05	4.38515e-05	0	0	0.0032952
1104	0	9.31723e-05	5.02215e-05	0	0	0.00326405
1105	0	0.000105336	5.64249e-05	0	0	0.00323317
1106	0	0.000117836	6.24031e-05	0	0	0.00320275
1107	0	0.000130528	6.81032e-05	0	0	0.003173
1108	0	0.000143271	7.34821e-05	0	0	0.00314407
1109	0	0.000155922	7.85084e-05	0	0	0.00311611
1110	0	0.000168336	8.31627e-05	0	0	0.0030892
1111	0	0.000180371	8.74356e-05	0	0	0.00306345
1112	0	0.000191888	9.13241e-05	0	0	0.00303892
1113	0	0.000202768	9.48284e-05	0	0	0.00301568
1114	0	0.000209161	9.6823e-05	0	1.00006e-05	0.00299065
1115	0	0.000214558	9.83713e-05	0	2.0572e-05	0.00296678
1116	0	0.000219166	9.95368e-05	0	3.11758e-05	0.00294417
1117	0	0.000222998	0.00010031	0	4.19509e-05	0.00292262
1118	0	0.000226106	0.000100678	0	5.30962e-05	0.00290183
1119	0	0.000228562	0.00010063	0	6.48486e-05	0.00288139
1120	0	0.000230451	0.000100155	0	7.74439e-05	0.00286091
1121	0	0.000231853	9.92414e-05	0	9.10657e-05	0.00284004
1122	0	0.00023283	9.78815e-05	0	0.000105799	0.00281859
1123	0	0.000233417	9.60659e-05	0	0.000121601	0.00279656
1124	0	0.000233624	9.37847e-05	0	0.0001383	0.00277415
1125	0	0.00023344	9.10279e-05	0	0.000155621	0.00275173
1126	0	0.000232845	8.77877e-05	0	0.000173235	0.00272975
1127	0	0.000231818	8.40625e-05	0	0.000190815	0.00270866
1128	0	0.000230343	7.9862e-05	0	0.000208076	0.00268883
1129	0	0.00022841	7.52112e-05	0	0.000224808	0.00267052
1130	0	0.00022602	7.01518e-05	0	0.00024087	0.00265387
1131	0	0.000223183	6.47408e-05	0	0.000256177	0.00263889
1132	0	0.000219925	5.90454e-05	0	0.000270667	0.00262556
1133	1.6213e-05	0.000216179	5.29883e-05	0	0.000282543	0.0026089
1134	3.89478e-05	0.00021208	4.67251e-05	0	0.000292733	0.00259172
1135	6.00744e-05	0.00020777	4.03913e-05	0	0.000301962	0.00257639
1136	7.89221e-05	0.000203357	3.40499e-05	0	0.000310133	0.00256301
1137	9.48732e-05	0.000198946	2.77659e-05	0	0.000317149	0.00255167
1138	0.000107516	0.000194625	2.16166e-05	0	0.000322935	0.00254237
1139	0.000116774	0.000190454	1.57007e-05	0	0.00032746	0.00253495
1140	0.000122958	0.00018646	1.0144e-05	0	0.000330754	0.00252908
1141	0.00012671	0.000182648	5.09616e-06	0	0.000332914	0.00252422
1142	0.000128854	0.000179021	7.1684e-07	0	0.000334085	0.00251968
1143	0.000130178	0.000174595	0	0	0.000334324	0.00251463
1144	0.000131323	0.000170484	0	0	0.000333924	0.00250859
1145	0.000132636	0.000167015	0	0	0.000333053	0.0025012
1146	0.000134202	0.00016423	0	0	0.000331796	0.0024923
1147	0.000135939	0.000162122	0	0	0.000330181	0.00248197
1148	0.000137711	0.000160619	0	0	0.000328187	0.00247051
1149	0.000139398	0.000159593	0	0	0.000325752	0.00245829
1150	0.000140918	0.000158878	0	0	0.000322797	0.00244573
1151	0.000142213	0.0001583	0	0	0.00031923	0.00243314
1152	0.000143227	0.000157695	0	0	0.000314963	0.00242077
1153	0.000143882	0.000156272	1.83702e-06	0	0.00030984	0.00240864
1154	0.000144128	0.000154541	3.73648e-06	0	0.000303868	0.00239689
1155	0.000143918	0.000152468	5.5345e-06	0	0.000297008	0.00238552
1156	0.000143237	0.00015	7.20032e-06	0	0.000289235	0.00237449
1157	0.000142104	0.000147109	8.70613e-06	0	0.000280546	0.00236376
1158	0.000140568	0.000143801	1.00249e-05	0	0.000270967	0.00235331
1159	0.000138693	0.000140114	1.11322e-05	0	0.000260552	0.0023431
1160	0.000136537	0.000136123	1.2011e-05	0	0.000249395	0.00233312
1161	0.000134139	0.000131941	1.26576e-05	0	0.00023763	0.00232333
1162	0.000131496	0.000127711	1.30875e-05	0	0.000225434	0.00231367
1163	0.000128573	0.000123603	1.33371e-05	0	0.000213015	0.00230404
1164	0.000125314	0.000119795	1.34629e-05	0	0.000200593	0.00229433
1165	0.000121681	0.00011646	1.35353e-05	0	0.000188381	0.00228442
1166	0.000117694	0.000113741	1.36303e-05	0	0.000176554	0.00227418
1167	0.000113463	0.00011173	1.38204e-05	0	0.000165237	0.00226348
1168	0.000109207	0.000110442	1.41668e-05	0	0.000154494	0.00225222
1169	0.00010524	0.000109801	1.47154e-05	0	0.000144347	0.0022403
1170	0.000101936	0.000109631	1.54957e-05	0	0.000134793	0.0022276
1171	9.96786e-05	0.000109665	1.65224e-05	0	0.000125832	0.002214
1172	9.88061e-05	0.000109563	1.77984e-05	0	0.000117487	0.00219938
1173	9.95699e-05	0.000108949	1.93176e-05	0	0.00010981	0.00218357
1174	0.000102106	0.000107455	2.10676e-05	0	0.000102877	0.00216646
1175	0.000106421	0.000104775	2.30317e-05	0	9.67701e-05	0.00214794
1176	0.000112395	0.000100704	2.51915e-05	0	9.15544e-05	0.00212799
1177	0.000119793	9.51779e-05	2.75292e-05	0	8.72624e-05	0.00210664
1178	0.000128278	8.82819e-05	3.00307e-05	0	8.38824e-05	0.00208402
1179	0.000137444	8.02425e-05	3.26875e-05	0	8.13571e-05	0.00206036
1180	0.00014685	7.13965e-05	3.54987e-05	0	7.95915e-05	0.00203589
1181	0.000156058	6.21457e-05	3.84707e-05	0	7.84657e-05	0.00201093
1182	0.000164679	5.29048e-05	4.1616e-05	0	7.78495e-05	0.00198574
1183	0.00017242	4.40535e-05	4.49513e-05	0	7.76149e-05	0.00196059
1184	0.000179109	3.59001e-05	4.84944e-05	0	7.76453e-05	0.00193566
1185	0.000184724	2.86604e-05	5.22617e-05	0	7.78397e-05	0.00191108
1186	0.000189386	2.24538e-05	5.62656e-05	0	7.81131e-05	0.0018869
1187	0.000193349	1.73131e-05	6.05129e-05	0	7.83944e-05	0.00186308
1188	0.000196967	1.32028e-05	6.50039e-05	0	7.86235e-05	0.00183955
1189	0.00020065	1.00408e-05	6.97319e-05	0	7.87493e-05	0.00181621
1190	0.000204824	7.71945e-06	7.46837e-05	0	7.87284e-05	0.00179294
1191	0.000209875	6.12233e-06	7.98392e-05	0	7.85253e-05	0.00176964
1192	0.000216114	5.1363e-06	8.51725e-05	0	7.81135e-05	0.00174625
1193	0.000223731	4.65876e-06	9.0652e-05	0	7.74764e-05	0.00172274
1194	0.000232775	4.60115e-06	9.62402e-05	0	7.66071e-05	0.00169917
1195	0.000243127	4.88974e-06	0.000101894	0	7.55072e-05	0.00167564
1196	0.000254501	5.46425e-06	0.000107567	0	7.41842e-05	0.00165234
1197	0.000266451	6.27463e-06	0.000113206	0	7.26463e-05	0.0016295
1198	0.00027839	7.27577e-06	0.00011876	0	7.08962e-05	0.00160743
1199	0.000289621	8.42063e-06	0.00012418	0	6.89225e-05	0.00158649
1200	0.000299371	9.65272e-06	0.000129424	0	6.6692e-05	0.00156713
1201	0.00030684	1.09014e-05	0.000134464	0	6.41482e-05	0.00154983
1202	0.00031129	1.2085e-05	0.000139281	0	6.1226e-05	0.00153507
1203	0.000312168	1.31254e-05	0.000143854	0	5.78894e-05	0.0015232
1204	0.000309269	1.39737e-05	0.000148137	0	5.41888e-05	0.00151431
1205	0.000302875	1.46363e-05	0.000152037	0	5.03163e-05	0.00150802
1206	0.000293768	1.5183e-05	0.000155414	0	4.66172e-05	0.00150353
1207	0.000283074	1.57256e-05	0.000158104	0	4.35335e-05	0.00149969
1208	0.000271937	1.63678e-05	0.000159971	0	4.1482e-05	0.00149541
1209	0.000261194	1.71531e-05	0.000160968	0	4.07231e-05	0.00148995
1210	0.0002512	1.80407e-05	0.000161157	0	4.12862e-05	0.00148313
1211	0.000241909	1.89261e-05	0.0001607	0	4.29894e-05	0.00147523
1212	0.000233142	1.96951e-05	0.000159803	0	4.55309e-05	0.0014667
1213	0.000224869	2.02812e-05	0.000158661	0	4.85922e-05	0.0014578
1214	0.000217355	2.06969e-05	0.000157424	0	5.19007e-05	0.00144851
1215	0.000211112	2.10294e-05	0.00015619	0	5.52367e-05	0.00143849
1216	0.000206738	2.14102e-05	0.000155008	0	5.84125e-05	0.00142728
1217	0.000204716	2.19767e-05	0.000153896	0	6.12576e-05	0.0014145
1218	0.000205288	2.284e-05	0.000152838	0	6.36273e-05	0.00139994
1219	0.000208406	2.40656e-05	0.000151789	0	6.54311e-05	0.00138368
1220	0.000213758	2.56676e-05	0.000150668	0	6.66614e-05	0.00136599
1221	0.000220845	2.76143e-05	0.000149366	0	6.74058e-05	0.00134734
1222	0.000229072	2.98419e-05	0.000147761	0	6.78353e-05	0.00132826
1223	0.000237839	3.22721e-05	0.000145731	0	6.81746e-05	0.00130926
1224	0.000246611	3.48295e-05	0.000143177	0	6.86628e-05	0.00129078
1225	0.000254965	3.74545e-05	0.000140032	0	6.95164e-05	0.00127314
1226	0.000262598	4.01088e-05	0.000136271	0	7.09044e-05	0.00125651
1227	0.000269326	4.27731e-05	0.000131909	0	7.29344e-05	0.00124096
1228	0.000275048	4.54385e-05	0.000127	0	7.56521e-05	0.00122641
1229	0.000279722	4.80947e-05	0.000121629	0	7.90465e-05	0.00121275
1230	0.000283333	5.07179e-05	0.000115904	0	8.3058e-05	0.00119981
1231	0.000285884	5.32626e-05	0.000109951	0	8.75872e-05	0.00118743
1232	0.000287407	5.56574e-05	0.000103904	0	9.25017e-05	0.00117542
1233	0.000288006	5.78072e-05	9.78953e-05	0	9.76415e-05	0.00116363
1234	0.00028795	5.96006e-05	9.20419e-05	0	0.000102823	0.00115187
1235	0.000287786	6.0921e-05	8.64271e-05	0	0.000107844	0.00113993
1236	0.000288431	6.16599e-05	8.10858e-05	0	0.000112486	0.00112756
1237	0.00029115	6.17317e-05	7.59983e-05	0	0.000116537	0.00111443
1238	0.000297287	6.10875e-05	7.11022e-05	0	0.000119821	0.00110025
1239	0.000307696	5.97281e-05	6.63302e-05	0	0.000122254	0.00108484
1240	0.000322007	5.77128e-05	6.16638e-05	0	0.000123909	0.00106831
1241	0.000338071	5.51597e-05	5.71783e-05	0	0.000125055	0.00105118
1242	0.000352054	5.22328e-05	5.30478e-05	0	0.000126139	0.00103433
1243	0.000359406	4.91148e-05	4.94911e-05	0	0.000127682	0.00101884
1244	0.000356472	4.5972e-05	4.66733e-05	0	0.000130124	0.00100557
1245	0.000341999	4.29231e-05	4.46123e-05	0	0.000133675	0.000994906
1246	0.000317747	4.00233e-05	4.31436e-05	0	0.000138255	0.000986556
1247	0.000287852	3.72703e-05	4.19674e-05	0	0.000143546	0.000979729
1248	0.000257282	3.4627e-05	4.07528e-05	0	0.000149129	0.000973441
1249	0.000230212	3.20478e-05	3.92464e-05	0	0.000154628	0.000966858
1250	0.00020903	2.94995e-05	3.73338e-05	0	0.00015981	0.000959513
1251	0.000194234	2.69699e-05	3.50394e-05	0	0.000164592	0.000951324
1252	0.000184985	2.4466e-05	3.24801e-05	0	0.000169004	0.000942482
1253	0.000179841	2.20079e-05	2.98059e-05	0	0.000173115	0.000933314
1254	0.000177337	1.96217e-05	2.71492e-05	0	0.000176986	0.000924176
1255	0.000176245	1.73328e-05	2.45939e-05	0	0.000180629	0.000915445
1256	0.000175601	1.51625e-05	2.21588e-05	0	0.000183996	0.000907547
1257	0.000174619	1.3124e-05	1.97954e-05	0	0.000186979	0.000901011
1258	0.000172624	1.12213e-05	1.74041e-05	0	0.000189435	0.000896444
1259	0.000169101	9.44821e-06	1.48765e-05	0	0.000191235	0.000894384
1260	0.000163865	7.78898e-06	1.21664e-05	0	0.000192352	0.000895011
1261	0.000157281	6.21733e-06	9.36817e-06	0	0.000192963	0.000897815
1262	0.000150351	4.69286e-06	6.75611e-06	0	0.000193498	0.000901443
1263	0.000144539	3.1571e-06	4.74092e-06	0	0.0001946	0.000903904
1264	0.000141294	1.53825e-06	3.73534e-06	0	0.000196961	0.00090318
1265	0.000141499	0	3.90611e-06	0	0.000201036	0.000897973
1266	0.000145136	0	4.71027e-06	0	0.00020668	0.000888196
1267	0.000151421	0	6.3943e-06	0	0.000213635	0.000874983
1268	0.000159246	0	8.57046e-06	0	0.000220993	0.000860071
1269	0.000167709	0	1.0904e-05	0	0.00022766	0.000845097
1270	0.00017638	0	1.32066e-05	0	0.000232669	0.000831111
1271	0.000185217	0	1.54318e-05	0	0.000235462	0.000818489
1272	0.000194276	0	1.76052e-05	0	0.00023602	0.000807151
1273	0.000203455	1.29312e-06	1.93067e-05	0	0.000234626	0.000796848
1274	0.000212423	5.78086e-06	1.98716e-05	0	0.000231748	0.00078738
1275	0.000220757	1.05093e-05	2.02754e-05	0	0.000228509	0.00077874
1276	0.000228067	1.51462e-05	2.05906e-05	0	0.000225469	0.00077095
1277	0.000234119	1.95178e-05	2.08539e-05	0	0.000222881	0.000764036
1278	0.000238865	2.35919e-05	2.10758e-05	0	0.000220733	0.000757979
1279	0.0002424	2.74193e-05	2.12518e-05	0	0.000218868	0.000752707
1280	0.000244892	3.10742e-05	2.13709e-05	0	0.000217097	0.000748105
1281	0.000246512	3.46068e-05	2.14037e-05	4.28512e-07	0.000215273	0.000744038
1282	0.000247467	3.80606e-05	2.13718e-05	4.44394e-07	0.000213311	0.000740374
1283	0.000247902	4.14407e-05	2.12676e-05	0	0.000211191	0.000736997
1284	0.000247881	4.47225e-05	2.10481e-05	0	0.000208943	0.00073382
1285	0.000247481	4.79033e-05	2.07282e-05	0	0.000206612	0.000730796
1286	0.000246723	5.09784e-05	2.03099e-05	0	0.000204255	0.000727915
1287	0.000245588	5.39525e-05	1.9801e-05	0	0.000201933	0.000725202
1288	0.000244027	5.68403e-05	1.92147e-05	0	0.0001997	0.000722708
1289	0.000241977	5.96649e-05	1.85685e-05	0	0.000197608	0.000720501
1290	0.000239368	6.24548e-05	1.78828e-05	0	0.000195703	0.000718653
1291	0.000236138	6.5241e-05	1.71779e-05	0	0.000194026	0.000717232
1292	0.000232242	6.80531e-05	1.64727e-05	0	0.000192615	0.000716297
1293	0.000227662	7.09175e-05	1.57824e-05	0	0.000191507	0.000715889
1294	0.000222403	7.38548e-05	1.51176e-05	0	0.000190739	0.000716038
1295	0.000216499	7.68794e-05	1.44844e-05	0	0.000190346	0.000716757
1296	0.000210008	7.9999e-05	1.38848e-05	0	0.000190364	0.000718048
1297	0.000203009	8.32159e-05	1.33184e-05	0	0.000190828	0.000719902
1298	0.000195591	8.65276e-05	1.2784e-05	0	0.00019177	0.000722307
1299	0.000187858	8.99284e-05	1.22819e-05	0	0.000193215	0.000725242
1300	0.000179916	9.34108e-05	1.18153e-05	0	0.000195179	0.000728681
1301	0.00017187	9.69663e-05	1.13926e-05	0	0.000197665	0.000732596
1302	0.000163822	0.000100586	1.10275e-05	0	0.000200662	0.000736955
1303	0.000155865	0.00010426	1.07398e-05	0	0.00020414	0.000741726
1304	0.000148075	0.000107981	1.05551e-05	0	0.00020805	0.000746879
1305	0.00014051	0.000111738	1.05033e-05	0	0.000212324	0.000752387
1306	0.000133203	0.000115523	1.06179e-05	0	0.000216879	0.000758231
1307	0.000126167	0.000119324	1.09344e-05	0	0.000221617	0.000764398
1308	0.000119397	0.000123131	1.14892e-05	0	0.000226433	0.00077088
1309	0.00011289	0.00012693	1.23193e-05	0	0.000231215	0.000777662
1310	0.000106657	0.000130707	1.34626e-05	0	0.00023586	0.000784719
1311	0.000100742	0.000134447	1.49579e-05	0	0.000240267	0.000791998
1312	9.52368e-05	0.000138136	1.68456e-05	0	0.000244353	0.000799409
1313	9.02801e-05	0.000141763	1.91671e-05	0	0.000248055	0.000806822
1314	8.60447e-05	0.000145317	2.1962e-05	0	0.000251337	0.000814069
1315	8.27094e-05	0.000148798	2.52652e-05	0	0.000254198	0.000820955
1316	8.0422e-05	0.000152206	2.91018e-05	0	0.000256676	0.000827284
1317	7.92618e-05	0.000155551	3.34833e-05	0	0.000258853	0.000832876
1318	7.92113e-05	0.000158843	3.84055e-05	0	0.000260852	0.000837596
1319	8.01466e-05	0.000162096	4.38489e-05	0	0.000262828	0.000841365
1320	8.18482e-05	0.00016532	4.97825e-05	0	0.000264956	0.000844166
1321	8.4032e-05	0.000168519	5.61702e-05	0	0.000267409	0.000846041
1322	8.63907e-05	0.000171688	6.29768e-05	0	0.00027034	0.000847078
1323	8.86369e-05	0.00017481	7.01745e-05	0	0.000273864	0.0008474
1324	9.05384e-05	0.000177856	7.77461e-05	0	0.00027805	0.000847151
1325	9.19376e-05	0.000180783	8.56861e-05	0	0.000282914	0.000846477
1326	9.27561e-05	0.000183543	9.39989e-05	0	0.00028843	0.000845523
1327	9.29842e-05	0.000186081	0.000102696	0	0.000294537	0.000844417
1328	9.26639e-05	0.000188346	0.000111794	0	0.000301155	0.000843265
1329	9.18683e-05	0.000190294	0.000121309	0	0.000308197	0.000842143
1330	9.06855e-05	0.000191891	0.000131255	0	0.000315581	0.000841094
1331	8.92068e-05	0.000193116	0.000141642	0	0.000323232	0.000840129
1332	8.752e-05	0.000193962	0.000152474	0	0.000331087	0.000839235
1333	8.57069e-05	0.000194431	0.000163749	0	0.000339093	0.000838381
1334	8.38408e-05	0.000194533	0.000175453	0	0.000347201	0.000837531
1335	8.19816e-05	0.000194284	0.000187561	0	0.000355364	0.000836662
1336	8.01689e-05	0.000193702	0.000200035	0	0.000363534	0.000835777
1337	7.84111e-05	0.000192806	0.00021282	0	0.000371658	0.000834917
1338	7.66769e-05	0.00019162	0.000225842	0	0.000379677	0.00083417
1339	7.48912e-05	0.000190168	0.000239008	0	0.000387531	0.000833667
1340	7.2945e-05	0.000188481	0.000252214	0	0.00039516	0.000833562
1341	7.0722e-05	0.000186597	0.000265348	0	0.000402518	0.000833994
1342	6.81436e-05	0.000184562	0.000278308	0	0.000409582	0.000835022
1343	6.52233e-05	0.000182439	0.000291013	0	0.00041637	0.000836563
1344	6.2116e-05	0.000180301	0.00030342	0	0.000422947	0.000838339
1345	5.91399e-05	0.000178234	0.000315532	0	0.000429426	0.000839859
1346	5.67563e-05	0.000176329	0.000327396	0	0.000435951	0.00084047
1347	5.54992e-05	0.000174676	0.000339087	0	0.000442674	0.000839461
1348	5.58676e-05	0.000173354	0.000350689	0	0.000449711	0.000836221
1349	5.82076e-05	0.000172423	0.000362272	0	0.000457107	0.000830385
1350	6.26189e-05	0.000171922	0.000373874	0	0.000464813	0.000821945
1351	6.89141e-05	0.000171869	0.000385501	0	0.000472684	0.000811265
1352	7.66445e-05	0.000172269	0.000397137	0	0.000480498	0.000799017
1353	8.51867e-05	0.000173123	0.000408765	0	0.000487997	0.000786036
1354	9.38651e-05	0.000174437	0.000420391	0	0.000494929	0.000773156
1355	0.00010208	0.000176226	0.000432059	0	0.000501093	0.000761066
1356	0.000109409	0.000178515	0.000443865	0	0.000506359	0.000750224
1357	0.000115657	0.00018133	0.000455943	0	0.000510681	0.00074084
1358	0.000120852	0.000184699	0.000468462	0	0.00051409	0.000732905
1359	0.000125188	0.000188649	0.000481607	0	0.000516675	0.000726271
1360	0.000128945	0.000193213	0.000495562	0	0.000518571	0.000720716
1361	0.000132407	0.000198431	0.000510498	0	0.000519934	0.000716014
1362	0.000135808	0.000204357	0.000526571	0	0.000520938	0.000711968
1363	0.000139316	0.000211058	0.000543913	0	0.000521759	0.000708423
1364	0.000143038	0.0002186	0.000562642	0	0.000522561	0.000705256
1365	0.000147058	0.000227032	0.000582875	0	0.000523485	0.000702354
1366	0.000151458	0.000236367	0.000604744	0	0.000524621	0.000699585
1367	0.000156331	0.000246547	0.000628421	0	0.000525983	0.000696784
1368	0.000161765	0.000257426	0.00065415	0	0.000527491	0.00069375
1369	0.000167811	0.000268758	0.000682259	0	0.000528965	0.000690264
1370	0.000174444	0.000280201	0.000713178	0	0.000530131	0.000686123
1371	0.000181531	0.000291342	0.000747426	0	0.000530666	0.000681182
1372	0.000188832	0.000301748	0.000785589	0	0.00053024	0.000675388
1373	0.000196023	0.000311017	0.000828274	0	0.000528579	0.000668788
1374	0.000202756	0.000318843	0.000876064	0	0.000525514	0.000661519
1375	0.000208723	0.000325055	0.000929474	0	0.000521016	0.000653761
1376	0.00021371	0.000329637	0.00098893	0	0.000515197	0.000645696
1377	0.000217626	0.00033272	0.00105477	0	0.000508291	0.000637454
1378	0.000220493	0.000334541	0.00112725	0	0.000500611	0.000629093
1379	0.000222407	0.000335391	0.00120663	0	0.000492494	0.000620591
1380	0.000223493	0.000335553	0.00129316	0	0.00048425	0.000611862
1381	0.000223858	0.000335251	0.00138715	0	0.000476118	0.000602785
1382	0.00022356	0.000334621	0.00148901	0	0.000468241	0.000593242
1383	0.000222606	0.000333693	0.0015992	0	0.000460656	0.000583151
1384	0.000220954	0.000332403	0.00171827	0	0.000453304	0.000572484
1385	0.000218536	0.000330609	0.0018468	0	0.000446048	0.000561287
1386	0.000215269	0.000328129	0.00198542	0	0.0004387	0.000549669
1387	0.000211086	0.000324759	0.00213476	0	0.000431051	0.000537776
1388	0.000205963	0.000320317	0.00229541	0	0.000422906	0.000525743
1389	0.000199954	0.000314654	0.00246795	0	0.000414118	0.000513629
1390	0.000193227	0.000307682	0.00265289	0	0.000404614	0.000501354
1391	0.000186074	0.000299371	0.00285069	0	0.000394408	0.000488666
1392	0.000178885	0.000289745	0.00306174	0	0.000383588	0.000475169
1393	0.000172067	0.000278864	0.00328638	0	0.000372286	0.00046041
1394	0.000165936	0.000266787	0.00352492	0	0.000360626	0.000444006
1395	0.000160614	0.000253553	0.00377761	0	0.000348677	0.000425772
1396	0.000155974	0.000239162	0.00404469	0	0.000336427	0.000405791
1397	0.000151664	0.000223576	0.00432633	0	0.000323787	0.0003844
1398	0.0001472	0.000206732	0.00462261	0	0.000310626	0.000362095
1399	0.00014208	0.000188573	0.00493349	0	0.000296814	0.0003394
1400	0.000135905	0.000169064	0.0052588	0	0.000282264	0.000316753
1401	0.000128435	0.000148209	0.00559815	0	0.000266953	0.00029444
1402	0.000119605	0.000126062	0.00595098	0	0.000250917	0.000272584
1403	0.000109506	0.000102719	0.00631654	0	0.000234232	0.000251183
1404	9.83505e-05	7.83142e-05	0.00669386	0	0.000216995	0.000230159
1405	8.64434e-05	5.30115e-05	0.00708182	0	0.000199297	0.000209403
1406	7.41686e-05	2.70009e-05	0.00747912	0	0.000181218	0.000188802
1407	6.19711e-05	4.90785e-07	0.00788429	0	0.000162817	0.000168254
1408	5.01895e-05	0	0.00828668	0	0.000140566	0.000147268
1409	3.94242e-05	0	0.00869337	0	0.000118014	0.000126195
1410	3.00445e-05	0	0.00910275	0	9.53112e-05	0.000105043
1411	2.22236e-05	0	0.00951291	0	7.25614e-05	8.38774e-05
1412	1.58516e-05	0	0.00992188	0	4.98957e-05	6.28495e-05
1413	1.04836e-05	0	0.0103276	0	2.7479e-05	4.22064e-05
1414	5.35522e-06	0	0.0107279	0	5.50993e-06	2.22854e-05
1415	0	0	0.0111155	0	0	0
1416	0	0	0.0114767	0	0	0
1417	0	0	0.0118271	0	0	0
1418	0	0	0.0121646	0	0	0
1419	0	0	0.0124873	0	0	0
1420	0	0	0.0127932	0	0	0
1421	0	0	0.0130805	0	0	0
1422	0	0	0.0133477	0	0	0
1423	0	0	0.0135933	0	0	0
1424	0	0	0.0138162	0	0	0
1425	0	0	0.0140153	0	0	0
1426	0	0	0.0141901	0	0	0
1427	0	0	0.0143402	0	0	0
1428	0	0	0.0144652	0	0	0
1429	0	0	0.014565	0	0	0
1430	0	0	0.0146394	0	0	0
1431	0	0	0.0146883	0	0	0
1432	0	0	0.0147114	0	0	0
1433	0	0	0.0147085	0	0	0
1434	0	0	0.0146792	0	0	0
1435	0	0	0.0146233	0	0	0
1436	0	0	0.0145405	0	0	0
1437	0	0	0.0144308	0	0	0
1438	0	0	0.0142943	0	0	0
1439	0	0	0.0141313	0	0	0
1440	0	0	0.0139423	0	0	0
1441	0	0	0.0137216	0	0	1.04936e-05
1442	0	0	0.0134655	0	0	3.92431e-05
1443	0	0	0.0131857	0	0	6.9356e-05
1444	0	0	0.0128838	0	0	0.00010073
1445	0	0	0.0125616	0	0	0.000133261
1446	1.50838e-05	0	0.0122203	0	0	0.000161737
1447	3.18659e-05	0	0.011858	0	1.77639e-05	0.000184579
1448	4.9419e-05	1.14445e-05	0.0114759	0	3.85527e-05	0.000206178
1449	6.82738e-05	4.57643e-05	0.0110732	0	5.6852e-05	0.000227322
1450	8.83721e-05	8.02542e-05	0.0106591	0	7.57758e-05	0.000248261
1451	0.000109712	0.000114707	0.0102354	0	9.54042e-05	0.000268861
1452	0.000132449	0.000148959	0.0098037	0	0.000115832	0.000288985
1453	0.000156851	0.000182882	0.00936553	0	0.000137164	0.000308516
1454	0.000183207	0.000216377	0.00892262	0	0.00015951	0.000327355
1455	0.000211702	0.000249358	0.00847699	0	0.000182983	0.000345392
1456	0.000242292	0.000281729	0.00803103	0	0.000207675	0.000362464
1457	0.000274613	0.000313323	0.00758757	0	0.000233595	0.000378341
1458	0.000308001	0.000343823	0.00714978	0	0.000260588	0.000392752
1459	0.000341619	0.00037268	0.00672109	0	0.000288238	0.00040547
1460	0.000374663	0.000399099	0.00630493	0	0.000315833	0.000416393
1461	0.00040657	0.000422117	0.00590442	0	0.000342437	0.000425582
1462	0.000437147	0.000440805	0.00552214	0	0.00036708	0.000433219
1463	0.000466602	0.000454507	0.00515988	0	0.000389	0.000439505
1464	0.000495483	0.000463039	0.00481853	0	0.000407851	0.000444565
1465	0.000524535	0.000466756	0.00449811	0	0.000423785	0.000448416
1466	0.000554494	0.000466456	0.00419794	0	0.000437375	0.000450998
1467	0.000585859	0.000463174	0.0039169	0	0.00044943	0.000452269
1468	0.000618675	0.000457945	0.00365368	0	0.000460782	0.000452292
1469	0.000652435	0.000451619	0.00340701	0	0.000472122	0.000451292
1470	0.000686147	0.000444757	0.00317578	0	0.000483923	0.000449653
1471	0.000718575	0.000437628	0.00295904	0	0.000496454	0.000447867
1472	0.000748489	0.000430278	0.00275603	0	0.00050983	0.000446457
1473	0.000774665	0.000422669	0.00256609	0	0.000524055	0.000445913
1474	0.000795623	0.000414864	0.00238862	0	0.000539035	0.000446645
1475	0.000809563	0.000407109	0.00222304	0	0.000554583	0.000448947
1476	0.0008151	0.000399741	0.00206882	0	0.000570465	0.000452903
1477	0.000812494	0.000392949	0.00192545	0	0.000586477	0.00045829
1478	0.000804144	0.000386643	0.00179245	0	0.000602497	0.000464568
1479	0.000793644	0.000380568	0.00166936	0	0.000618455	0.000471021
1480	0.000784197	0.000374532	0.00155573	0	0.000634276	0.000476963
1481	0.000777702	0.000368518	0.00145105	0	0.000649864	0.000481878
1482	0.000774827	0.000362638	0.0013548	0	0.000665128	0.000485459
1483	0.000775499	0.000357026	0.00126641	0	0.000680032	0.000487588
1484	0.000779243	0.000351783	0.00118531	0	0.000694603	0.000488311
1485	0.000785304	0.000346979	0.00111088	0	0.000708925	0.000487804
1486	0.000792713	0.000342668	0.0010425	0	0.000723112	0.000486339
1487	0.000800371	0.000338909	0.000979578	0	0.000737284	0.000484243
1488	0.000807157	0.000335768	0.000921516	0	0.000751546	0.000481851
1489	0.000812041	0.000333321	0.000867762	0	0.000765972	0.000479473
1490	0.000814188	0.000331633	0.000817808	0	0.000780599	0.000477359
1491	0.000813069	0.000330737	0.000771206	0	0.000795424	0.00047568
1492	0.000808542	0.000330611	0.000727577	0	0.000810393	0.000474515
1493	0.000800891	0.000331157	0.000686624	0	0.000825385	0.000473847
1494	0.000790789	0.000332213	0.000648137	0	0.000840182	0.000473565
1495	0.000779167	0.00033357	0.000611992	0	0.000854438	0.000473483
1496	0.000767044	0.000335016	0.000578145	0	0.000867665	0.000473364
1497	0.000755351	0.000336367	0.00054661	0	0.000879257	0.000472948
1498	0.000744801	0.000337492	0.000517424	0	0.000888556	0.000471983
1499	0.00073584	0.000338305	0.000490616	0	0.000894965	0.000470262
1500	0.000728648	0.000338749	0.000466163	0	0.000898065	0.000467645
1501	0.00072318	0.000338782	0.000443964	0	0.000897699	0.000464082
1502	0.000719222	0.000338359	0.000423831	0	0.000894009	0.000459619
1503	0.000716449	0.000337436	0.000405499	0	0.000887393	0.000454378
1504	0.000714497	0.000335977	0.000388656	0	0.000878437	0.00044851
1505	0.000713028	0.000333964	0.000372983	0	0.000867807	0.000442136
1506	0.000711796	0.000331399	0.000358194	0	0.000856178	0.000435278
1507	0.000710695	0.000328302	0.00034407	0	0.000844163	0.000427829
1508	0.000709752	0.000324701	0.000330468	0	0.000832279	0.000419561
1509	0.000709082	0.00032063	0.000317315	0	0.000820917	0.000410192
1510	0.000708783	0.000316122	0.000304587	0	0.000810313	0.000399498
1511	0.000708822	0.00031122	0.000292279	0	0.000800538	0.000387421
1512	0.000708942	0.000305985	0.000280379	0	0.000791495	0.000374142
1513	0.000708632	0.000300501	0.000268865	0	0.000782943	0.000360079
1514	0.000707194	0.000294876	0.000257703	0	0.000774545	0.000345811
1515	0.000703874	0.000289233	0.000246865	0	0.000765922	0.000331962
1516	0.000698036	0.000283685	0.000236344	0	0.000756712	0.000319082
1517	0.000689307	0.000278311	0.000226156	0	0.000746618	0.000307568
1518	0.000677668	0.000273144	0.000216347	0	0.00073543	0.000297627
1519	0.000663438	0.000268161	0.000206973	0	0.000723047	0.000289303
1520	0.000647195	0.000263296	0.000198091	0	0.000709467	0.000282506
1521	0.000629648	0.000258464	0.000189746	0	0.000694787	0.000277067
1522	0.000611508	0.000253583	0.000181962	0	0.000679184	0.000272766
1523	0.000593397	0.000248594	0.000174739	0	0.000662891	0.000269363
1524	0.000575802	0.000243471	0.000168058	0	0.000646174	0.000266615
1525	0.000559062	0.000238221	0.00016188	0	0.000629296	0.00026429
1526	0.000543383	0.000232879	0.000156152	0	0.000612497	0.000262183
1527	0.000528869	0.000227498	0.000150815	0	0.000595973	0.000260126
1528	0.000515548	0.000222135	0.000145802	0	0.000579869	0.00025799
1529	0.000503409	0.000216846	0.000141048	0	0.000564279	0.000255686
1530	0.000492449	0.000211672	0.00013649	0	0.000549259	0.000253165
1531	0.000482687	0.000206636	0.000132072	0	0.000534838	0.000250406
1532	0.000474156	0.000201743	0.000127743	0	0.00052103	0.000247421
1533	0.00046682	0.000196997	0.000123456	0	0.000507846	0.000244256
1534	0.00046048	0.000192417	0.000119171	0	0.000495295	0.000241
1535	0.000454721	0.000188051	0.000114849	0	0.000483387	0.000237785
1536	0.000448993	0.000183966	0.000110462	0	0.000472132	0.000234766
1537	0.00044283	0.000180212	0.000105993	0	0.000461542	0.000232083
1538	0.000436085	0.000176795	0.000101455	0	0.000451626	0.000229814
1539	0.000429024	0.000173665	9.68881e-05	0	0.000442377	0.000227939
1540	0.000422221	0.000170744	9.2373e-05	0	0.000433749	0.000226331
1541	0.000416292	0.000167972	8.80158e-05	0	0.000425646	0.000224786
1542	0.000411636	0.000165341	8.39327e-05	0	0.00041792	0.000223091
1543	0.000408315	0.000162897	8.02262e-05	0	0.000410404	0.000221083
1544	0.00040608	0.000160715	7.69611e-05	0	0.000402953	0.000218713
1545	0.000404496	0.000158866	7.41514e-05	0	0.000395476	0.000216067
1546	0.000403082	0.000157392	7.17596e-05	0	0.000387963	0.000213341
1547	0.000401422	0.0001563	6.97102e-05	0	0.000380478	0.000210791
1548	0.00039923	0.000155574	6.79105e-05	0	0.000373134	0.000208658
1549	0.000396373	0.000155184	6.62713e-05	0	0.000366069	0.000207111
1550	0.000392869	0.000155105	6.472e-05	0	0.000359412	0.000206218
1551	0.000388862	0.000155314	6.32056e-05	0	0.000353279	0.000205947
1552	0.000384589	0.000155794	6.16959e-05	0	0.000347753	0.000206194
1553	0.00038035	0.000156526	6.01712e-05	0	0.000342895	0.00020682
1554	0.000376467	0.000157492	5.86188e-05	0	0.000338744	0.000207681
1555	0.000373248	0.00015867	5.70284e-05	0	0.000335318	0.00020865
1556	0.000370936	0.000160045	5.53904e-05	0	0.000332622	0.000209627
1557	0.000369664	0.000161618	5.36956e-05	0	0.000330644	0.00021054
1558	0.000369414	0.000163411	5.19353e-05	0	0.000329366	0.000211344
1559	0.000370001	0.000165475	5.01026e-05	0	0.000328757	0.00021201
1560	0.0003711	0.000167884	4.81925e-05	0	0.000328785	0.00021252
1561	0.000372308	0.000170724	4.62028e-05	0	0.000329424	0.000212857
1562	0.000373237	0.000174078	4.41349e-05	0	0.000330652	0.000212995
1563	0.00037361	0.000178002	4.19942e-05	0	0.000332464	0.000212894
1564	0.000373306	0.000182521	3.97896e-05	0	0.000334868	0.000212507
1565	0.000372369	0.000187621	3.75329e-05	0	0.00033788	0.000211782
1566	0.000370949	0.000193262	3.52368e-05	0	0.000341519	0.000210685
1567	0.000369236	0.000199385	3.29138e-05	0	0.000345795	0.000209209
1568	0.000367385	0.000205931	3.05736e-05	0	0.000350708	0.000207391
1569	0.000365486	0.000212845	2.82214e-05	0	0.000356238	0.000205307
1570	0.000363552	0.000220084	2.58571e-05	0	0.000362352	0.000203076
1571	0.000361547	0.000227614	2.34739e-05	0	0.000369008	0.000200837
1572	0.000359416	0.000235409	2.10585e-05	0	0.000376162	0.000198741
1573	0.000357129	0.000243451	1.85911e-05	0	0.000383777	0.000196926
1574	0.000354726	0.00025172	1.60473e-05	0	0.000391829	0.000195503
1575	0.000352364	0.00026019	1.3399e-05	0	0.000400313	0.000194546
1576	0.00035033	0.000268823	1.06177e-05	0	0.000409245	0.000194085
1577	0.000348979	0.00027758	7.6757e-06	0	0.000418657	0.00019411
1578	0.000348544	0.000286452	4.54758e-06	0	0.000428581	0.000194597
1579	0.000348897	0.000295495	1.21113e-06	0	0.000439035	0.000195536
1580	0.000349427	0.000304015	0	0	0.000449914	0.000196828
1581	0.000349262	0.000312493	0	0	0.000461216	0.000198606
1582	0.000347655	0.000321441	0	0	0.00047292	0.000201139
1583	0.000344229	0.000330776	0	0	0.000484883	0.000204891
1584	0.000338887	0.000340231	0	0	0.000496854	0.000210699
1585	0.000331713	0.000349469	0	0	0.000508571	0.000219452
1586	0.000323465	0.000358286	0	0	0.000520119	0.000231046
1587	0.000316365	0.000366778	0	0	0.000532312	0.000243272
1588	0.000313783	0.000375279	0	0	0.00054654	0.000252265
1589	0.000318149	0.000384049	0	0	0.000563866	0.000255058
1590	0.000328879	0.000392978	0	0	0.000584155	0.000252061
1591	0.000342738	0.000401625	0	0	0.000606195	0.000246715
1592	0.000356315	0.000409527	0	0	0.000628681	0.000242726
1593	0.00036801	0.000416458	0	0	0.000651008	0.000241814
1594	0.000378025	0.000422442	0	0	0.000673283	0.000243694
1595	0.000387226	0.000427632	0	0	0.000695887	0.000247314
1596	0.000396291	0.000432203	0	0	0.000719137	0.000251809
1597	0.000405508	0.000436332	0	0	0.000743215	0.000256727
1598	0.000414933	0.000440201	0	0	0.000768216	0.00026188
1599	0.000424542	0.000444007	0	0	0.000794211	0.000267189
1600	0.000434325	0.000447958	0	0	0.00082127	0.000272603
1601	0.000444309	0.000452266	0	0	0.000849471	0.000278076
1602	0.000454558	0.000457134	0	0	0.000878897	0.000283573
1603	0.000465146	0.00046275	0	0	0.000909629	0.000289073
1604	0.000476134	0.000469276	0	0	0.000941736	0.000294577
1605	0.000487526	0.000476847	0	0	0.00097527	0.000300117
1606	0.000499243	0.000485564	0	0	0.00101025	0.00030575
1607	0.000511086	0.00049416	3.77484e-06	0	0.0010465	0.000311361
1608	0.000522815	0.000503391	9.22497e-06	0	0.00108403	0.000317151
1609	0.000534148	0.000514003	1.41156e-05	0	0.00112283	0.000323327
1610	0.000544801	0.000525921	1.83879e-05	0	0.0011627	0.000329957
1611	0.000554559	0.000538989	2.20342e-05	0	0.00120344	0.000337073
1612	0.000563318	0.00055298	2.50944e-05	0	0.00124478	0.000344655
1613	0.000571093	0.000567614	2.76448e-05	0	0.00128642	0.000352636
1614	0.000578007	0.000582594	2.9779e-05	0	0.00132809	0.00036091
1615	0.000584242	0.000597638	3.15852e-05	0	0.00136952	0.000369347
1616	0.000590005	0.000612525	3.31229e-05	0	0.00141049	0.000377814
1617	0.000595503	0.000627113	3.44059e-05	0	0.00145085	0.000386183
1618	0.000600945	0.000641369	3.53935e-05	0	0.00149052	0.000394342
1619	0.00060656	0.000655355	3.59936e-05	0	0.00152951	0.000402187
1620	0.000612634	0.000669227	3.60761e-05	0	0.00156784	0.000409619
1621	0.000619534	0.000683201	3.54937e-05	0	0.00160563	0.000416525
1622	0.000627711	0.000697528	3.4106e-05	0	0.00164296	0.000422777
1623	0.000637677	0.000712462	3.18012e-05	0	0.00167995	0.000428227
1624	0.000649952	0.000728229	2.85125e-05	0	0.00171671	0.00043272
1625	0.000664979	0.000745006	2.42261e-05	0	0.00175333	0.000436112
1626	0.000683029	0.000762916	1.89815e-05	0	0.00178989	0.0004383
1627	0.000704105	0.000782021	1.28658e-05	0	0.00182646	0.000439251
1628	0.000727862	0.000802339	6.00319e-06	0	0.00186308	0.000439023
1629	0.000753565	0.000823355	0	0	0.00189965	0.000437705
1630	0.000780089	0.000843316	0	0	0.00193582	0.000435306
1631	0.000806111	0.000864419	0	0	0.00197155	0.00043249
1632	0.000830125	0.000886778	0	0	0.00200641	0.000429653
1633	0.000850661	0.000910527	0	0	0.00203991	0.000427186
1634	0.000866469	0.000935789	0	0	0.00207154	0.000425429
1635	0.00087668	0.000962648	0	0	0.00210086	0.000424631
1636	0.000880916	0.000991125	0	0	0.00212758	0.000424932
1637	0.000879327	0.00102118	0	0	0.00215153	0.000426358
1638	0.000872558	0.00105271	0	0	0.00217264	0.000428833
1639	0.000861639	0.00108566	0	0	0.00219088	0.000432205
1640	0.000847826	0.00111996	0	0	0.00220622	0.000436273
1641	0.000832427	0.00115568	0	0	0.00221862	0.000440809
1642	0.000816624	0.00119299	0	0	0.00222807	0.000445566
1643	0.000801348	0.00123218	0	0	0.00223462	0.000450277
1644	0.000787213	0.00127371	0	0	0.00223829	0.00045465
1645	0.00077453	0.0013181	0	0	0.00223908	0.000458357
1646	0.000763418	0.00136597	0	0	0.00223684	0.000461036
1647	0.000754039	0.00141793	0	0	0.00223128	0.000462279
1648	0.000746934	0.00147458	0	0	0.002222	0.000461619
1649	0.000743222	0.00153638	0	0	0.00220852	0.000458535
1650	0.000744138	0.00160373	0	0	0.00219049	0.000452593
1651	0.000749582	0.00167698	0	0	0.0021678	0.000443804
1652	0.000756555	0.00175654	0	0	0.00214072	0.000432972
1653	0.000759523	0.00184289	0	0	0.00210987	0.000421567
1654	0.00075362	0.00193647	0	0	0.00207587	0.000410899
1655	0.000738296	0.0020376	0	0	0.00203898	0.000401218
1656	0.000717722	0.00214642	0	0	0.00199916	0.000391624
1657	0.000697521	0.00226302	0	0	0.00195627	0.000380898
1658	0.000681193	0.00238762	0	0	0.00191043	0.000368384
1659	0.000669239	0.00252057	0	0	0.00186208	0.000354194
1660	0.000660729	0.00266231	0	0	0.0018119	0.000338826
1661	0.000655689	0.00281344	0	0	0.00176108	0.000322776
1662	0.000656994	0.00297475	0	0	0.00171183	0.00030645
1663	0.000667382	0.00314693	0	0	0.00166577	0.000289954
1664	0.000679986	0.00332955	0	0	0.00161871	0.000272458
1665	0.000681934	0.00352144	0	0	0.00156306	0.000252699
1666	0.000674603	0.00372298	0	0	0.00149975	0.000230875
1667	0.000670455	0.00393574	0	0	0.00143664	0.0002085
1668	0.000672755	0.00416029	0	0	0.00137694	0.000186699
1669	0.000675603	0.0043962	0	0	0.00131915	0.000166118
1670	0.000673217	0.00464304	0	0	0.00126205	0.000147504
1671	0.000662319	0.00490059	0	0	0.00120555	0.000131619
1672	0.000641558	0.00516871	0	0	0.00114992	0.000118922
1673	0.000611307	0.00544719	0	0	0.00109527	0.00010939
1674	0.000573479	0.00573568	0	0	0.00104144	0.00010254
1675	0.000530975	0.00603356	0	0	0.000987892	9.75801e-05
1676	0.000486867	0.00633986	0	0	0.000933709	9.36423e-05
1677	0.000443659	0.00665324	0	0	0.000877712	8.99954e-05
1678	0.000402891	0.00697212	0	0	0.000818702	8.61448e-05
1679	0.000365192	0.00729486	0	0	0.000755781	8.17972e-05
1680	0.000330672	0.00761997	0	0	0.00068866	7.67312e-05
1681	0.00029936	0.00794629	0	0	0.0006178	7.06709e-05
1682	0.00027145	0.00827296	0	0	0.000544323	6.32594e-05
1683	0.000247238	0.00859927	0	0	0.000469718	5.41637e-05
1684	0.000226849	0.00892449	0	0	0.00039545	4.32558e-05
1685	0.000209977	0.00924762	0	0	0.000322655	3.07606e-05
1686	0.000195801	0.00956738	0	0	0.000252003	1.72748e-05
1687	0.000183152	0.00988222	0	0	0.000183762	3.63614e-06
1688	0.000162046	0.0101891	0	0	0.00011463	0
1689	0.000138177	0.0104873	0	0	4.71345e-05	0
1690	0.000106215	0.0107673	0	0	0	0
1691	5.28992e-05	0.0110147	0	0	0	0
1692	2.06527e-06	0.0112507	0	0	0	0
1693	0	0.0114623	0	0	0	0
1694	0	0.0116601	0	0	0	0
1695	0	0.0118435	0	0	0	0
1696	0	0.0120113	0	0	0	0
1697	0	0.0121627	0	0	0	0
1698	0	0.0122967	0	0	0	0
1699	0	0.0124125	0	0	0	0
1700	0	0.0125094	0	0	0	0
1701	0	0.0125867	0	0	0	0
1702	0	0.0126176	6.53068e-05	0	0	0
1703	0	0.0126238	0.000141709	0	0	0
1704	0	0.0126058	0.000227809	0	0	0
1705	0	0.0125638	0.000323467	0	0	0
1706	0	0.0124981	0.000428065	0	0	0
1707	0	0.0124095	0.000540475	0	0	0
1708	0	0.0122991	0.000659119	0	0	0
1709	0	0.012168	0.000782147	0	0	0
1710	0	0.0120177	0.000907696	0	0	0
1711	0	0.0118495	0.00103418	0	0	0
1712	0	0.0116648	0.00116053	0	0	0
1713	0	0.0114647	0.00128632	0	0	0
1714	0	0.0112504	0.00141178	0	0	0
1715	0	0.0110229	0.00153753	0	0	0
1716	0	0.0107834	0.00166437	0	0	0
1717	0	0.0105329	0.00179292	0	0	0
1718	0	0.0102731	0.00192327	0	0	0
1719	2.25534e-05	0.0100009	0.00204999	1.87524e-05	0	0
1720	6.92747e-05	0.0097186	0.00217183	4.02227e-05	0	0
1721	0.000115577	0.00943275	0.00229026	6.24915e-05	0	0
1722	0.000160636	0.00914575	0.00240146	8.57381e-05	0	0
1723	0.000203528	0.00886006	0.00250078	0.000110126	0	0
1724	0.000226584	0.00856379	0.00257717	0.000137234	3.45846e-05	0
1725	0.000237222	0.00826603	0.00262849	0.000166604	8.77054e-05	0
1726	0.000243572	0.00797577	0.00265373	0.000197783	0.000143169	0
1727	0.000246368	0.00769484	0.00265105	0.000230893	0.000201229	0
1728	0.000246694	0.00742447	0.00262118	0.000265808	0.000262127	0
1729	0.000245733	0.00716519	0.00256756	0.000302034	0.000325895	0
1730	0.000244561	0.00691686	0.00249578	0.000338714	0.00039222	0
1731	0.000243956	0.0066789	0.00241258	0.00037478	0.000460405	0
1732	0.000244155	0.00645063	0.00232459	0.000409195	0.000529429	0
1733	0.000244632	0.0062315	0.00223736	0.000441157	0.000598067	0
1734	0.000234887	0.00602066	0.00215274	0.000469923	0.000661598	1.00078e-05
1735	0.000220172	0.00581841	0.00207417	0.000495422	0.000721416	2.30735e-05
1736	0.000201762	0.0056247	0.00200252	0.00051751	0.000777582	3.73682e-05
1737	0.000180871	0.00543916	0.00193732	0.000535948	0.000830262	5.23582e-05
1738	0.000159663	0.00526123	0.00187762	0.000550455	0.000880187	6.72769e-05
1739	0.000140282	0.00509024	0.00182235	0.000560808	0.000928351	8.13221e-05
1740	0.000124203	0.0049256	0.00177052	0.000566937	0.000975675	9.38314e-05
1741	0.000112154	0.00476673	0.00172141	0.000568948	0.00102277	0.000104387
1742	0.000104361	0.00461313	0.00167453	0.000567107	0.00106986	0.000112854
1743	0.000100759	0.00446431	0.00162959	0.000561781	0.00111682	0.000119376
1744	0.00010106	0.00431987	0.00158641	0.000553398	0.0011633	0.000124321
1745	0.000104736	0.00417942	0.00154489	0.000542407	0.0012088	0.000128173
1746	0.000111052	0.00404271	0.00150501	0.000529246	0.00125284	0.000131363
1747	0.000119166	0.00390952	0.00146677	0.000514337	0.00129498	0.000134074
1748	0.000128273	0.00377974	0.00143025	0.000498078	0.00133494	0.000136111
1749	0.000137716	0.00365329	0.00139557	0.000480841	0.00137259	0.000136923
1750	0.000146995	0.00353015	0.00136278	0.000462968	0.00140793	0.000135789
1751	0.000155685	0.00341034	0.00133182	0.000444753	0.00144109	0.000132124
1752	0.00016331	0.00329388	0.00130244	0.000426433	0.00147224	0.00012577
1753	0.000169273	0.00318084	0.00127421	0.000408174	0.00150155	0.000117119
1754	0.000172897	0.00307132	0.00124654	0.000390071	0.00152919	0.000107016
1755	0.000173555	0.00296547	0.00121883	0.000372159	0.00155531	9.64983e-05
1756	0.000170844	0.00286353	0.00119056	0.000354423	0.00158012	8.64882e-05
1757	0.000164704	0.00276582	0.00116133	0.00033682	0.00160384	7.75719e-05
1758	0.000155439	0.0026727	0.00113091	0.000319289	0.00162672	6.99281e-05
1759	0.000143654	0.00258458	0.00109921	0.000301776	0.00164904	6.3387e-05
1760	0.000130121	0.00250183	0.00106622	0.00028425	0.00167102	5.75632e-05
1761	0.000115645	0.00242475	0.00103198	0.000266719	0.00169284	5.20003e-05
1762	0.000100941	0.00235353	0.000996537	0.00024924	0.00171463	4.62887e-05
1763	8.6549e-05	0.00228824	0.00095998	0.000231918	0.00173648	4.01413e-05
1764	7.28073e-05	0.00222876	0.000922394	0.000214892	0.00175849	3.3429e-05
1765	5.98585e-05	0.00217484	0.000883893	0.000198318	0.00178075	2.61778e-05
1766	4.7694e-05	0.00212606	0.000844628	0.000182343	0.00180337	1.85391e-05
1767	3.62152e-05	0.00208184	0.000804789	0.000167092	0.00182651	1.07409e-05
1768	2.52954e-05	0.00204149	0.00076462	0.000152648	0.00185035	3.03433e-06
1769	1.07763e-05	0.00200391	0.000723552	0.000138942	0.00187356	0
1770	0	0.00196814	0.000681792	0.000124967	0.00189525	0
1771	0	0.00193328	0.000640006	0.000110021	0.00191542	0
1772	0	0.0018987	0.000599615	9.60906e-05	0.00193731	0
1773	0	0.00186346	0.000561126	8.31621e-05	0.00196088	0
1774	0	0.00182664	0.000525085	7.12485e-05	0.00198602	0
1775	0	0.00178745	0.000492095	6.04143e-05	0.00201254	0
1776	0	0.00174522	0.000462802	5.08006e-05	0.00204022	0
1777	0	0.00169944	0.000437808	4.26347e-05	0.00206879	0
1778	0	0.00164986	0.000417437	3.62067e-05	0.00209795	0
1779	0	0.00159654	0.000401404	3.17963e-05	0.0021273	0
1780	0	0.00153987	0.0003886	2.95647e-05	0.00215626	0
1781	0	0.00148056	0.000377261	2.9448e-05	0.00218416	0
1782	0	0.00141948	0.000365592	3.11083e-05	0.00221029	0
1783	0	0.0013575	0.000352503	3.39662e-05	0.00223406	0
1784	0	0.00129534	0.000337951	3.73048e-05	0.00225511	0
1785	0	0.00123357	0.000322635	4.03975e-05	0.00227329	0
1786	0	0.00117269	0.000307338	4.26237e-05	0.00228856	0
1787	0	0.00111327	0.000292394	4.35527e-05	0.00230104	0
1788	0	0.00105599	0.000277551	4.29984e-05	0.00231097	0
1789	0	0.00100174	0.000262178	4.10461e-05	0.00231882	0
1790	0	0.000951425	0.000245582	3.8038e-05	0.00232519	0
1791	0	0.000905784	0.000227307	3.44977e-05	0.00233065	0
1792	0	0.000865051	0.000207379	3.09917e-05	0.0023353	0
1793	0	0.000828714	0.000186423	2.79662e-05	0.00233861	0
1794	0	0.000795547	0.000165562	2.56257e-05	0.00233936	0
1795	0	0.000763988	0.000146057	2.39114e-05	0.00233612	0
1796	0	0.000732753	0.000128788	2.25836e-05	0.0023279	0
1797	0	0.00070136	0.000113854	2.13532e-05	0.00231476	0
1798	0	0.000670262	0.000100509	1.99883e-05	0.0022979	0
1799	0	0.000640525	8.75008e-05	1.83536e-05	0.00227928	0
1800	0	0.000613269	7.3617e-05	1.63869e-05	0.00226089	0
1801	0	0.00058918	5.81482e-05	1.40569e-05	0.00224416	0
1802	0	0.000568345	4.10714e-05	1.1336e-05	0.00222972	0
1803	0	0.000550375	2.29383e-05	8.20118e-06	0.00221747	0
1804	0	0.000534674	4.59447e-06	4.65025e-06	0.00220686	0
1805	0	0.000515946	0	0	0.00219615	0
1806	0	0.000497124	0	0	0.00218523	0
1807	0	0.000479905	0	0	0.0021738	0
1808	0	0.000464162	0	0	0.00216123	0
1809	0	0.000449753	0	0	0.00214707	0
1810	0	0.000436522	0	0	0.00213117	0
1811	0	0.000424331	0	0	0.00211377	0
1812	0	0.000413068	0	0	0.00209549	0
1813	0	0.000402634	0	0	0.00207717	0
1814	0	0.000392897	0	0	0.00205968	0
1815	0	0.000383651	0	0	0.00204371	0
1816	0	0.000374606	0	0	0.00202965	0
1817	0	0.000365437	0	0	0.00201771	0
1818	0	0.000355851	0	0	0.00200813	0
1819	0	0.000345638	0	0	0.00200128	0
1820	0	0.000334667	0	0	0.00199767	0
1821	0	0.000322835	0	0	0.0019978	0
1822	0	0.000310014	0	0	0.002002	0
1823	0	0.000296022	0	0	0.0020104	0
1824	0	0.000280636	0	0	0.00202296	0
1825	0	0.000263618	0	0	0.00203956	0
1826	0	0.000244754	0	0	0.0020601	0
1827	0	0.000223889	0	0	0.00208451	0
1828	0	0.000200964	0	0	0.00211272	0
1829	0	0.000176055	0	0	0.00214457	0
1830	0	0.000149408	0	0	0.00217971	0
1831	0	0.000121472	0	0	0.00221758	0
1832	0	9.28901e-05	0	0	0.00225728	0
1833	0	6.44697e-05	0	0	0.00229764	0
1834	0	3.70961e-05	0	0	0.00233723	0
1835	0	1.16228e-05	0	0	0.00237452	0
1836	0	0	0	0	0.00240578	0
1837	0	0	0	0	0.00243027	0
1838	0	0	0	0	0.00244945	0
1839	0	0	0	0	0.00246284	0
1840	0	0	0	0	0.00247035	0
1841	0	0	0	0	0.00247215	0
1842	0	0	0	0	0.0024686	0
1843	0	0	0	0	0.00246009	0
1844	0	0	0	0	0.002447	0
1845	0	0	0	0	0.00242969	0
1846	0	0	0	0	0.00240846	0
1847	0	0	0	0	0.00238357	0
1848	0	0	0	0	0.00235532	0
1849	0	0	0	0	0.00232403	0
1850	0	0	0	0	0.0022901	0
1851	0	0	0	0	0.00225399	0
1852	0	0	0	0	0.0022162	0
1853	0	0	0	0	0.00217729	0
1854	0	0	0	0	0.00213784	0
1855	0	0	0	0	0.00209836	0
1856	0	0	0	0	0.00205932	0
1857	0	0	0	0	0.00202108	0
1858	0	0	0	0	0.00198388	0
1859	0	0	0	0	0.00194784	0
1860	0	0	0	0	0.00191304	0
1861	0	0	0	4.92795e-07	0.00187951	0
1862	0	0	0	6.46455e-06	0.00184721	0
1863	0	0	0	1.22161e-05	0.00181629	0
1864	0	0	0	1.77279e-05	0.0017868	0
1865	0	0	0	2.29935e-05	0.00175864	0
1866	0	0	0	2.79872e-05	0.00173151	0
1867	0	0	0	3.2638e-05	0.00170488	0
1868	0	0	0	3.68368e-05	0.00167805	0
1869	0	0	0	4.04849e-05	0.00165046	0
1870	0	3.31162e-06	0	4.32376e-05	0.00162125	0
1871	0	6.50299e-06	0	4.54891e-05	0.00159145	0
1872	0	9.03933e-06	0	4.74119e-05	0.00156196	0
1873	0	1.07996e-05	0	4.91195e-05	0.00153379	0
1874	0	1.1622e-05	0	5.06505e-05	0.00150791	0
1875	0	1.13201e-05	0	5.19606e-05	0.00148499	0
1876	0	9.73176e-06	0	5.29548e-05	0.00146537	0
1877	0	6.76638e-06	0	5.35336e-05	0.00144911	0
1878	0	2.42668e-06	0	5.36267e-05	0.00143601	0
1879	0	0	0	5.29007e-05	0.00142513	0
1880	0	0	0	5.13363e-05	0.00141601	0
1881	0	0	0	4.92368e-05	0.00140874	0
1882	0	0	0	4.67061e-05	0.00140291	0
1883	0	0	0	4.38721e-05	0.00139812	0
1884	0	0	0	4.08755e-05	0.00139402	0
1885	0	0	0	3.78568e-05	0.0013903	0
1886	0	0	0	3.49408e-05	0.00138677	0
1887	0	0	0	3.22197e-05	0.00138335	0
1888	0	0	0	2.97388e-05	0.00138009	0
1889	0	0	0	2.74838e-05	0.0013771	0
1890	0	0	0	2.53756e-05	0.00137452	0
1891	0	0	0	2.32745e-05	0.00137241	0
1892	0	0	0	2.09999e-05	0.00137072	0
1893	0	0	0	1.83656e-05	0.00136926	0
1894	0	0	0	1.52242e-05	0.0013678	0
1895	0	0	0	1.15069e-05	0.00136613	0
1896	0	0	0	7.24166e-06	0.00136412	0
1897	0	0	0	2.54343e-06	0.00136172	0
1898	0	0	0	0	0.00135888	0
1899	0	0	0	0	0.00135555	0
1900	0	0	0	0	0.00135168	0
1901	0	0	0	0	0.00134717	0
1902	0	0	0	0	0.00134192	0
1903	0	0	0	0	0.00133587	0
1904	0	0	0	0	0.00132902	0
1905	0	0	0	0	0.00132141	0
1906	0	0	0	0	0.00131311	0
1907	0	0	0	0	0.00130423	0
1908	0	0	0	0	0.0012949	0
1909	0	0	0	0	0.0012853	0
1910	0	0	0	0	0.00127565	0
1911	0	0	0	0	0.00126624	0
1912	0	0	0	0	0.00125737	0
1913	0	0	0	0	0.00124935	0
1914	0	0	0	0	0.0012424	0
1915	0	0	0	0	0.00123655	0
1916	0	0	0	0	0.00123164	0
1917	0	0	0	0	0.00122733	0
1918	0	0	0	0	0.00122319	0
1919	0	0	0	0	0.00121869	0
1920	0	0	0	0	0.00121316	0
1921	0	0	0	0	0.00120583	0
1922	0	0	0	0	0.00119609	0
1923	0	0	0	0	0.0011838	0
1924	0	0	0	0	0.00116935	0
1925	0	0	0	0	0.00115349	0
1926	0	0	0	0	0.00113702	0
1927	0	0	0	0	0.00112062	0
1928	0	0	0	0	0.0011048	0
1929	0	0	0	0	0.00108986	0
1930	0	0	0	0	0.00107592	0
1931	0	0	0	0	0.00106282	0
1932	0	0	0	0	0.00105027	0
1933	0	0	0	0	0.0010379	0
1934	0	0	0	0	0.0010254	0
1935	0	0	0	0	0.00101259	0
1936	0	0	0	0	0.000999396	0
1937	0	0	0	0	0.000985872	0
1938	0	0	0	0	0.000972168	0
1939	0	0	0	0	0.000958498	0
1940	0	0	0	0	0.000945119	0
1941	0	0	0	0	0.00093233	0
1942	0	0	0	0	0.000920487	0
1943	0	0	0	0	0.000909975	0
1944	0	0	0	0	0.000901081	0
1945	0	0	0	0	0.000893825	0
1946	0	0	0	0	0.000887957	0
1947	3.97028e-06	0	0	0	0.000881941	0
1948	1.38202e-06	0	0	1.64995e-06	0.000878927	0
1949	0	0	0	5.66168e-06	0.000876297	0
1950	0	0	0	9.66063e-06	0.000873528	0
1951	0	0	0	1.38335e-05	0.000870157	0
1952	0	0	0	1.77945e-05	0.000865269	0
1953	2.02374e-06	0	0	2.08146e-05	0.000857714	0
1954	7.26118e-06	0	0	2.25656e-05	0.000847189	0
1955	1.21572e-05	0	0	2.38598e-05	0.00083535	0
1956	1.65798e-05	0	0	2.48799e-05	0.000823004	0
1957	2.05596e-05	0	0	2.57417e-05	0.000810864	0
1958	2.42439e-05	0	0	2.64779e-05	0.000799391	0
1959	2.79004e-05	0	0	2.706e-05	0.000788752	0
1960	3.18963e-05	0	0	2.74387e-05	0.000778859	0
1961	3.66201e-05	0	0	2.75782e-05	0.00076948	0
1962	4.23519e-05	0	0	2.74774e-05	0.000760355	0
1963	4.91271e-05	0	0	2.71783e-05	0.000751296	0
1964	5.66556e-05	0	0	2.67645e-05	0.000742245	0
1965	6.43537e-05	0	0	2.63497e-05	0.000733276	0
1966	7.14984e-05	0	0	2.60555e-05	0.000724551	0
1967	7.74568e-05	0	0	2.59833e-05	0.000716258	0
1968	8.18947e-05	0	0	2.61871e-05	0.000708557	0
1969	8.4873e-05	0	0	2.66617e-05	0.000701539	0
1970	8.6793e-05	0	0	2.73477e-05	0.000695228	0
1971	8.82263e-05	0	0	2.8152e-05	0.000689584	0
1972	8.97182e-05	0	0	2.89743e-05	0.000684533	0
1973	9.16499e-05	0	0	2.97294e-05	0.000679984	0
1974	9.42071e-05	0	0	3.03673e-05	0.000675845	0
1975	9.74543e-05	0	0	3.08985e-05	0.000672035	0
1976	0.000101477	0	0	3.14343e-05	0.000668469	0
1977	0.000106533	0	0	3.22348e-05	0.000665056	0
1978	0.000113109	0	0	3.37102e-05	0.00066169	0
1979	0.000121742	0	0	3.62803e-05	0.000658285	0
1980	0.000132526	0	0	4.00386e-05	0.00065484	0
1981	0.000144536	0	0	4.43628e-05	0.000651516	0
1982	0.000155665	0	0	4.78358e-05	0.000648622	0
1983	0.000163323	0	0	4.87694e-05	0.000646474	0
1984	0.00016572	0	0	4.61377e-05	0.000645139	0
1985	0.000162807	0	0	4.02408e-05	0.000644282	0
1986	0.00015611	0	0	3.25526e-05	0.000643239	0
1987	0.000147671	0	0	2.48932e-05	0.000641308	0
1988	0.000139004	0	0	1.85905e-05	0.000638079	0
1989	0.00013072	0	0	1.41447e-05	0.00063358	0
1990	0.000122784	0	0	1.1399e-05	0.000628194	0
1991	0.000114944	0	0	9.89851e-06	0.000622426	0
1992	0.000107021	0	0	9.17558e-06	0.000616684	0
1993	9.90056e-05	0	0	8.88334e-06	0.000611162	0
1994	9.10605e-05	0	0	8.82668e-06	0.000605859	0
1995	8.35067e-05	0	0	8.96356e-06	0.00060065	0
1996	7.68429e-05	0	0	9.41912e-06	0.000595359	0
1997	7.17454e-05	0	0	1.04898e-05	0.000589806	0
[truncated: 2,003 more rows]
[truncated: 73 more columns]

## Sheet: 7 Sources
Reconstructed Source Distributions										Compare Input & Reconstructed Sink Samples					Sink Sample Weights
Age (Ma)	Source 1	Source 2	Source 3	Source 4	Source 5	Source 6	Source 7				Mean		St. Dev.			Princeton, Bluestone, Hinton	Surprise Canyon3- 06GC149, Surprise_Cyn2, SurpriseC_Cngl	24PL09, 10JM94, 40JM94, 05PL15, 09LB04	Mauch_Chunk	KY-21-SG	Tonka	Stanley, Hot_spring	BC05	09-CM-699	MS11, MS10	MS01, MSGE313	BC01, BC02, CC01	ML01, MP-DZ1	1QZ19	SY-D, Watahomigi, Manakacha1	Tumbling Run, Pottsville Fm, OH-1-SS	Pocohontas, Lee, VA-1-GN	Racoon, Montevallo, Sewanee	KY-18-CB	OH-4-SN	BCRA-01-10	MB1-3, MB2-4, MB2-2, MB2-3, MB2-5, MB2-1, MB1-2, MB1-1	a16, a23, a29, a38, a48, a49, a50	46-1, 46-2	IB_AD, IB_M1, IB_M2	FCB_AD	FCB_A2	FCB_A1	S3	GS01, GS09	MS04, MS05, MS06	MC05, MC17	GS11, GS24	MC20
0	1.68002e-13	3.62018e-12	0	0	0	4.28617e-13	0			Cross-correlation	0.843416	±	0.113063		Weights Source 1	0.000657538	0.00178766	0.00154508	0.00889011	0.00251047	0	0.0656852	0.00604775	0.0191186	0	0	0.0446572	0.00696689	0.000551409	0.00220886	0.00516938	0.00347949	0	0	0	0.00689672	0.00482819	3.36005e-05	0	0	0.00342525	0.00120841	0.000862293	0.0352009	0.000376823	0	0.0116683	0	0.00802282
1	1.72329e-13	3.71403e-12	0	0	0	4.4156e-13	0			Likeness	0.811385	±	0.0646135		Weights Source 2	0.101954	0.117728	0	0.153791	0.139816	0.00731318	0.257583	0	0.265099	0	0	0	0.245552	0.0688494	0.0404109	0.368196	0.0205743	0.0787357	0.0657544	0.250762	0.192246	0.00902311	0.11183	0.0513771	0.241369	0.245546	0.190532	0.0284427	0.182652	0	0	0	0.0328416	0.0767152
2	1.76764e-13	3.81025e-12	0	0	0	4.54888e-13	0			Kuiper V Value	0.0865373	±	0.0599521		Weights Source 3	0.0418086	0.0796372	0.0021883	0.068042	0.041161	0	0.0236353	0.212548	0.0608313	0.270049	0.200146	0.212002	0.052159	0.0604087	0.03317	0.0210556	0.0819816	0.0182305	0.0235307	0.0276594	0.0252426	0.0281551	0.0420319	0.0402099	0.0145522	0.0801395	0.0495395	0.0256188	0.0215218	0.206496	0.04356	0.173636	0.492348	0.206467
3	1.81307e-13	3.90891e-12	0	0	0	4.6861e-13	0			KS D Value	0.0610465	±	0.0512		Weights Source 4	0.0123693	0.0599048	0.951385	0	0.0471634	0.981291	0.0520029	0.346279	0	0.0933491	0.0385403	0.0123616	0.00718587	0.104831	0.124142	0	0.00709643	0.0858069	0.0587882	0.00867717	0.118109	0.0831686	0.0679665	0.0445108	0.104507	0.0259985	0.0506815	0.148058	0.0487579	0.0332725	0	0.108634	0	0.0611434
4	1.85962e-13	4.01006e-12	0	0	0	4.82739e-13	0								Weights Source 5	0.00839368	0.0679163	0.0280674	0	0.0416519	0.0113954	0.014713	0.0989483	0	0.106457	0.431412	0.479777	0.00198437	0.043267	0.103458	0.00411489	0.00641753	0.030289	0.0172385	0.00633094	0.00341951	0.0262443	0.0327394	0.0215093	0.0355143	0.0139274	0.0397773	0.0136034	0.0461144	0.211678	0	0.188753	0.453923	0.0704153
5	1.90731e-13	4.11377e-12	0	0	0	4.97287e-13	0			Number of sink samples	108				Weights Source 6	0.0836059	0.175395	0.0168143	0.0865336	0.195959	0	0.0604239	0.268189	0.147236	0.108854	0.0216369	0.167507	0.112834	0.564864	0.45652	0.0898513	0.0782694	0.0775709	0.305587	0.0778808	0.0380761	0.219423	0.214662	0.223855	0.140326	0.124924	0.170455	0.0591818	0.117477	0.380919	0	0.331635	0	0.406369
6	1.95617e-13	4.2201e-12	0	0	0	5.12264e-13	0			Mean Cross-correlation of sink samples	0.318				Weights Source 7	0.751211	0.497631	0	0.682744	0.531738	0	0.525957	0.0679878	0.507715	0.42129	0.308265	0.0836955	0.573318	0.157229	0.24009	0.511613	0.802181	0.709367	0.529102	0.62869	0.61601	0.629157	0.530738	0.618538	0.463731	0.506039	0.497807	0.724233	0.548276	0.167258	0.95644	0.185674	0.0208872	0.170867
7	2.00623e-13	4.32911e-12	0	0	0	5.27683e-13	0			Range Cross-correlation of sink samples	0.962
8	2.05752e-13	4.44087e-12	0	0	0	5.43558e-13	0			Mean Kuiper V value of sink samples	0.409				Cross-correlation	0.960604	0.950487	0.909212	0.848952	0.935269	0.8965	0.792057	0.572417	0.699555	0.877001	0.901115	0.88612	0.830276	0.911902	0.951205	0.677486	0.904185	0.826999	0.886516	0.885475	0.897781	0.922909	0.854571	0.885441	0.918742	0.903469	0.912583	0.90517	0.902797	0.951718	0.676342	0.901011	0.948922	0.815983
9	2.11006e-13	4.55544e-12	0	0	0	5.599e-13	0			Range Kuiper V value of sink samples	0.952				Likeness	0.876487	0.886549	0.827852	0.789987	0.877015	0.80495	0.767412	0.565432	0.745599	0.778391	0.814467	0.782359	0.813522	0.865992	0.89376	0.749536	0.829396	0.754285	0.827205	0.836111	0.819148	0.866936	0.855072	0.840645	0.868	0.836521	0.86228	0.809033	0.844604	0.854913	0.530973	0.802087	0.846621	0.777289
10	2.16388e-13	4.67289e-12	0	0	0	5.76723e-13	0			Final Residual	0.149454				Kuiper V Value	0.0457236	0.0368243	0.148399	0.103953	0.0599313	0.117777	0.0878757	0.274909	0.0966807	0.179657	0.0736887	0.0952497	0.0846573	0.0523236	0.0388432	0.089612	0.114761	0.0867448	0.0473965	0.0716059	0.0627933	0.0432174	0.0829551	0.084503	0.0385643	0.0768629	0.0595879	0.104422	0.0966184	0.0607655	0.438736	0.0909459	0.0922284	0.0999546
11	2.21902e-13	4.7933e-12	0	0	0	5.94042e-13	0			Number of Iterations	240				KS D Value	0.0347597	0.0215942	0.114882	0.0674009	0.0344665	0.109247	0.0445035	0.22316	0.074859	0.109687	0.0375257	0.0568742	0.0629141	0.0480361	0.0346871	0.0480102	0.0752186	0.0532837	0.0268623	0.0450419	0.0498873	0.0298299	0.0531883	0.0494871	0.0295999	0.0543744	0.038061	0.0917062	0.0533149	0.0380061	0.288772	0.061153	0.0723156	0.0546691
12	2.27551e-13	4.91673e-12	0	0	0	6.11869e-13	0
13	2.33337e-13	5.04326e-12	0	0	0	6.3022e-13	0
14	2.39264e-13	5.17297e-12	0	0	0	6.4911e-13	0
15	2.45336e-13	5.30592e-12	0	0	0	6.68553e-13	0
16	2.51556e-13	5.44221e-12	0	0	0	6.88565e-13	0
17	2.57927e-13	5.5819e-12	0	0	0	7.09162e-13	0
18	2.64453e-13	5.72509e-12	0	0	0	7.30362e-13	0
19	2.71137e-13	5.87185e-12	0	0	0	7.5218e-13	0
20	2.77984e-13	6.02228e-12	0	0	0	7.74635e-13	0
21	2.84996e-13	6.17646e-12	0	0	0	7.97744e-13	0
22	2.92179e-13	6.33448e-12	0	0	0	8.21525e-13	0
23	2.99536e-13	6.49644e-12	0	0	0	8.45999e-13	0
24	3.07071e-13	6.66243e-12	0	0	0	8.71183e-13	0
25	3.14788e-13	6.83254e-12	0	0	0	8.97099e-13	0
26	3.22693e-13	7.00688e-12	0	0	0	9.23766e-13	0
27	3.30788e-13	7.18554e-12	0	0	0	9.51206e-13	0
28	3.39079e-13	7.36864e-12	0	0	0	9.7944e-13	0
29	3.4757e-13	7.55627e-12	0	0	0	1.00849e-12	0
30	3.56267e-13	7.74855e-12	0	0	0	1.03838e-12	0
31	3.65173e-13	7.94559e-12	0	0	0	1.06913e-12	0
32	3.74294e-13	8.14749e-12	0	0	0	1.10077e-12	0
33	3.83636e-13	8.35438e-12	0	0	0	1.13332e-12	0
34	3.93202e-13	8.56638e-12	0	0	0	1.16681e-12	0
35	4.02999e-13	8.78361e-12	0	0	0	1.20126e-12	0
36	4.13033e-13	9.00618e-12	0	0	0	1.23671e-12	0
37	4.23308e-13	9.23424e-12	0	0	0	1.27316e-12	0
38	4.3383e-13	9.46791e-12	0	0	0	1.31067e-12	0
39	4.44607e-13	9.70731e-12	0	0	0	1.34925e-12	0
40	4.55642e-13	9.9526e-12	0	0	0	1.38893e-12	0
41	4.66944e-13	1.02039e-11	0	0	0	1.42976e-12	0
42	4.78518e-13	1.04614e-11	0	0	0	1.47174e-12	0
43	4.90371e-13	1.07252e-11	0	0	0	1.51493e-12	0
44	5.02509e-13	1.09954e-11	0	0	0	1.55935e-12	0
45	5.14939e-13	1.12722e-11	0	0	0	1.60504e-12	0
46	5.27669e-13	1.15558e-11	0	0	0	1.65203e-12	0
47	5.40706e-13	1.18464e-11	0	0	0	1.70036e-12	0
48	5.54058e-13	1.2144e-11	0	0	0	1.75006e-12	0
49	5.67731e-13	1.24489e-11	0	0	0	1.80118e-12	0
50	5.81735e-13	1.27612e-11	0	0	0	1.85375e-12	0
51	5.96076e-13	1.30811e-11	0	0	0	1.90781e-12	0
52	6.10764e-13	1.34088e-11	0	0	0	1.96341e-12	0
53	6.25807e-13	1.37444e-11	0	0	0	2.02058e-12	0
54	6.41213e-13	1.40882e-11	0	0	0	2.07938e-12	0
55	6.56993e-13	1.44404e-11	0	0	0	2.13984e-12	0
56	6.73155e-13	1.4801e-11	0	0	0	2.20202e-12	0
57	6.89709e-13	1.51705e-11	0	0	0	2.26595e-12	0
58	7.06664e-13	1.55488e-11	0	0	0	2.33169e-12	0
59	7.24032e-13	1.59364e-11	0	0	0	2.3993e-12	0
60	7.41822e-13	1.63333e-11	0	0	0	2.46881e-12	0
61	7.60046e-13	1.67397e-11	0	0	0	2.54029e-12	0
62	7.78714e-13	1.7156e-11	0	0	0	2.61378e-12	0
63	7.97838e-13	1.75824e-11	0	0	0	2.68936e-12	0
64	8.17431e-13	1.8019e-11	0	0	0	2.76706e-12	0
65	8.37503e-13	1.84661e-11	0	0	0	2.84696e-12	0
66	8.58069e-13	1.8924e-11	0	0	0	2.92911e-12	0
67	8.7914e-13	1.93929e-11	0	0	0	3.01358e-12	0
68	9.00731e-13	1.98731e-11	0	0	0	3.10043e-12	0
69	9.22856e-13	2.03649e-11	0	0	0	3.18974e-12	0
70	9.45529e-13	2.08684e-11	0	0	0	3.28156e-12	0
71	9.68764e-13	2.1384e-11	0	0	0	3.37597e-12	0
72	9.92578e-13	2.1912e-11	0	0	0	3.47304e-12	0
73	1.01699e-12	2.24526e-11	0	0	0	3.57286e-12	0
74	1.04201e-12	2.30062e-11	0	0	0	3.67549e-12	0
75	1.06765e-12	2.35731e-11	0	0	0	3.78101e-12	0
76	1.09395e-12	2.41535e-11	0	0	0	3.88952e-12	0
77	1.12091e-12	2.47478e-11	0	0	0	4.00109e-12	0
78	1.14855e-12	2.53563e-11	0	0	0	4.11581e-12	0
79	1.1769e-12	2.59793e-11	0	0	0	4.23377e-12	0
80	1.20597e-12	2.66172e-11	0	0	0	4.35507e-12	0
81	1.23578e-12	2.72703e-11	0	0	0	4.47981e-12	0
82	1.26637e-12	2.79391e-11	0	0	0	4.60807e-12	0
83	1.29774e-12	2.86237e-11	0	0	0	4.73997e-12	0
84	1.32993e-12	2.93247e-11	0	0	0	4.87561e-12	0
85	1.36297e-12	3.00424e-11	0	0	0	5.01511e-12	0
86	1.39687e-12	3.07772e-11	0	0	0	5.15856e-12	0
87	1.43166e-12	3.15295e-11	0	0	0	5.3061e-12	0
88	1.46738e-12	3.22997e-11	0	0	0	5.45784e-12	0
89	1.50405e-12	3.30882e-11	0	0	0	5.61391e-12	0
90	1.5417e-12	3.38955e-11	0	0	0	5.77443e-12	0
91	1.58037e-12	3.4722e-11	0	0	0	5.93954e-12	0
92	1.62009e-12	3.55682e-11	0	0	0	6.10938e-12	0
93	1.6609e-12	3.64344e-11	0	0	0	6.2841e-12	0
94	1.70282e-12	3.73213e-11	0	0	0	6.46383e-12	0
95	1.74591e-12	3.82293e-11	0	0	0	6.64873e-12	0
96	1.7902e-12	3.91588e-11	0	0	0	6.83897e-12	0
97	1.83573e-12	4.01105e-11	0	0	0	7.03471e-12	0
98	1.88255e-12	4.10848e-11	0	0	0	7.23611e-12	0
99	1.9307e-12	4.20823e-11	0	0	0	7.44336e-12	0
100	1.98023e-12	4.31035e-11	0	0	0	7.65663e-12	0
101	2.0312e-12	4.41489e-11	0	0	0	7.87612e-12	0
102	2.08365e-12	4.52193e-11	0	0	0	8.10203e-12	0
103	2.13765e-12	4.63151e-11	0	0	0	8.33457e-12	0
104	2.19324e-12	4.7437e-11	0	0	0	8.57393e-12	0
105	2.2505e-12	4.85857e-11	0	0	0	8.82035e-12	0
106	2.30949e-12	4.97617e-11	0	0	0	9.07406e-12	0
107	2.37027e-12	5.09657e-11	0	0	0	9.33529e-12	0
108	2.43292e-12	5.21984e-11	0	0	0	9.6043e-12	0
109	2.4975e-12	5.34606e-11	0	0	0	9.88134e-12	0
110	2.56411e-12	5.47529e-11	0	0	0	1.01667e-11	0
111	2.63282e-12	5.6076e-11	0	0	0	1.04606e-11	0
112	2.70372e-12	5.74308e-11	0	0	0	1.07634e-11	0
113	2.7769e-12	5.8818e-11	0	0	0	1.10755e-11	0
114	2.85246e-12	6.02384e-11	0	0	0	1.1397e-11	0
115	2.93049e-12	6.16928e-11	0	0	0	1.17284e-11	0
116	3.0111e-12	6.31821e-11	0	0	0	1.20701e-11	0
117	3.09441e-12	6.4707e-11	0	0	0	1.24225e-11	0
118	3.18052e-12	6.62685e-11	0	0	0	1.2786e-11	0
119	3.26955e-12	6.78674e-11	0	0	0	1.31612e-11	0
120	3.36163e-12	6.95045e-11	0	0	0	1.35487e-11	0
121	3.45687e-12	7.11806e-11	0	0	0	1.39493e-11	0
122	3.5554e-12	7.28966e-11	0	0	0	1.43639e-11	0
123	3.65731e-12	7.46536e-11	0	0	0	1.47937e-11	0
124	3.76053e-12	7.64776e-11	0	0	0	1.52458e-11	0
125	3.74891e-12	7.97501e-11	0	0	0	1.60068e-11	0
126	0	1.34479e-10	0	0	0	2.73894e-11	0
127	0	1.41772e-09	0	0	1.24477e-10	2.60814e-10	0
128	0	2.18014e-08	0	0	2.2739e-09	3.92364e-09	0
129	0	2.32988e-07	0	0	2.45455e-08	4.18707e-08	0
130	0	1.64741e-06	0	0	1.7371e-07	2.9602e-07	0
131	0	7.68465e-06	0	0	8.10394e-07	1.38081e-06	0
132	0	2.36425e-05	0	0	2.4933e-06	4.24819e-06	0
133	0	4.79734e-05	0	0	5.05922e-06	8.62005e-06	0
134	0	6.42015e-05	0	0	6.77063e-06	1.1536e-05	0
135	0	5.66689e-05	0	0	5.97625e-06	1.01825e-05	0
136	0	3.29992e-05	0	0	3.48007e-06	5.92943e-06	0
137	0	1.27016e-05	0	0	1.33951e-06	2.28228e-06	0
138	0	3.29812e-06	0	0	3.47837e-07	5.92623e-07	0
139	0	7.40951e-07	0	0	7.81809e-08	1.33138e-07	0
140	0	4.91232e-07	0	0	5.18761e-08	8.82646e-08	0
141	0	8.5848e-07	0	0	9.06483e-08	1.54248e-07	0
142	0	1.58602e-06	0	0	1.67433e-07	2.84969e-07	0
143	0	2.76577e-06	0	0	2.91932e-07	4.96943e-07	0
144	0	4.5315e-06	0	0	4.78256e-07	8.14202e-07	0
145	0	6.97473e-06	0	0	7.36072e-07	1.25319e-06	0
146	0	1.00849e-05	0	0	1.06428e-06	1.81202e-06	0
147	0	1.36985e-05	0	0	1.44565e-06	2.46129e-06	0
148	0	1.74796e-05	0	0	1.84478e-06	3.14065e-06	0
149	0	2.0953e-05	0	0	2.21159e-06	3.76471e-06	0
150	0	2.35949e-05	0	0	2.49088e-06	4.23934e-06	0
151	0	2.49601e-05	0	0	2.63574e-06	4.48454e-06	0
152	0	2.48045e-05	0	0	2.62051e-06	4.45645e-06	0
153	0	2.31564e-05	0	0	2.44824e-06	4.16014e-06	0
154	0	2.03081e-05	0	0	2.14985e-06	3.6481e-06	0
155	0	1.67309e-05	0	0	1.77519e-06	3.00505e-06	0
156	0	1.29486e-05	0	0	1.37965e-06	2.32506e-06	0
157	0	9.41407e-06	0	0	1.01116e-06	1.68946e-06	0
158	0	6.4294e-06	0	0	7.01847e-07	1.15254e-06	0
159	0	4.12461e-06	0	0	4.65688e-07	7.37626e-07	0
160	0	2.48519e-06	0	0	3.01498e-07	4.42106e-07	0
161	0	1.40591e-06	0	0	1.98571e-07	2.47157e-07	0
162	0	7.46e-07	0	0	1.42483e-07	1.27898e-07	0
163	0	3.69925e-07	0	0	1.19296e-07	6.14072e-08	0
164	0	1.68663e-07	0	0	1.17543e-07	3.23175e-08	0
165	0	6.44083e-08	0	0	1.28124e-07	3.76772e-08	0
166	0	4.98712e-09	0	0	1.42547e-07	9.37411e-08	0
167	0	0	0	0	1.5118e-07	2.28732e-07	0
168	0	0	0	0	1.36883e-07	5.39842e-07	0
169	0	0	0	0	7.54382e-08	1.15961e-06	0
170	0	0	0	0	0	2.24646e-06	0
171	0	0	0	0	0	3.94703e-06	0
172	0	0	0	0	0	6.37265e-06	0
173	0	0	0	0	0	9.4448e-06	0
174	0	0	0	0	0	1.28434e-05	0
175	0	0	0	0	0	1.60207e-05	0
176	0	0	0	0	0	1.83303e-05	0
177	0	0	0	0	0	1.92386e-05	0
178	0	0	0	0	0	1.85269e-05	0
179	0	0	0	0	0	1.6381e-05	0
180	0	0	0	0	0	1.33226e-05	0
181	0	0	0	0	4.86226e-07	9.90736e-06	0
182	0	0	0	0	1.41826e-06	6.77308e-06	0
183	0	0	0	0	2.2242e-06	4.52879e-06	0
184	0	0	0	0	2.84555e-06	3.49908e-06	0
185	0	0	0	0	3.24528e-06	3.89026e-06	0
186	0	0	0	0	3.40697e-06	5.79459e-06	0
187	0	0	0	0	3.35305e-06	9.09106e-06	0
188	0	0	0	0	3.17294e-06	1.32931e-05	0
189	0	0	0	0	3.03299e-06	1.74943e-05	0
190	0	0	0	0	3.14183e-06	2.05554e-05	0
191	0	0	0	0	3.67372e-06	2.15187e-05	0
192	0	0	0	0	4.6893e-06	2.00363e-05	0
193	0	0	0	0	6.10548e-06	1.65327e-05	0
194	0	0	0	0	7.73596e-06	1.1986e-05	0
195	0	0	0	0	9.3756e-06	7.47197e-06	0
196	0	0	0	0	1.08762e-05	3.7542e-06	0
197	0	0	0	0	1.21763e-05	1.1234e-06	0
198	0	0	0	0	1.29996e-05	0	0
199	0	0	0	0	1.34485e-05	0	0
200	0	0	0	0	1.4033e-05	0	0
201	0	0	0	0	1.46668e-05	0	0
202	0	0	0	0	1.52963e-05	0	0
203	0	0	0	0	1.58908e-05	0	0
204	0	0	0	0	1.64335e-05	0	0
205	0	0	0	0	1.69139e-05	0	0
206	0	0	0	0	1.73249e-05	0	0
207	0	0	0	0	1.76612e-05	0	0
208	0	0	0	0	1.79192e-05	0	0
209	0	0	0	0	1.8097e-05	0	0
210	0	0	0	0	1.81948e-05	0	0
211	0	0	0	0	1.82149e-05	0	0
212	0	0	0	0	1.8162e-05	0	0
213	0	0	0	0	1.80432e-05	0	0
214	0	0	0	0	1.78682e-05	0	0
215	0	0	0	0	1.76485e-05	0	0
216	0	0	0	0	1.73976e-05	0	0
217	0	3.89978e-07	0	0	1.70552e-05	0	0
218	0	1.24026e-06	0	0	1.66219e-05	0	0
219	0	2.27093e-06	0	0	1.61632e-05	0	0
220	0	3.48373e-06	0	0	1.5688e-05	0	0
221	0	4.86707e-06	0	0	1.52033e-05	0	0
222	0	6.39352e-06	0	0	1.47135e-05	0	0
223	0	7.9889e-06	0	0	1.41919e-05	6.13592e-08	0
224	0	9.45953e-06	0	0	1.35097e-05	4.59038e-07	0
225	0	1.08933e-05	0	0	1.28188e-05	8.57796e-07	0
226	0	1.22144e-05	0	0	1.21205e-05	1.24398e-06	0
227	0	1.33462e-05	0	0	1.14163e-05	1.60381e-06	0
228	0	1.42179e-05	0	0	1.07084e-05	1.92462e-06	0
229	0	1.47725e-05	0	0	1.0001e-05	2.19617e-06	0
230	0	1.49727e-05	0	0	9.30188e-06	2.41166e-06	0
231	0	1.48052e-05	0	0	8.62274e-06	2.56837e-06	0
232	0	1.42819e-05	0	0	7.98064e-06	2.66787e-06	0
233	0	1.34389e-05	0	0	7.39838e-06	2.71557e-06	0
234	0	1.23318e-05	0	0	6.90475e-06	2.71991e-06	0
235	0	1.10301e-05	0	0	6.53443e-06	2.69119e-06	0
236	0	9.60953e-06	0	0	6.32727e-06	2.64017e-06	0
237	0	8.14558e-06	0	0	6.32701e-06	2.57678e-06	0
238	0	6.70815e-06	0	0	6.5794e-06	2.50877e-06	0
239	0	5.36233e-06	0	0	7.12972e-06	2.43918e-06	0
240	0	4.18489e-06	0	0	8.02071e-06	2.35908e-06	0
241	0	3.3263e-06	0	0	9.2932e-06	2.22366e-06	0
242	0	3.18872e-06	0	0	1.09957e-05	1.88382e-06	0
243	0	4.84914e-06	0	0	1.32138e-05	9.22095e-07	0
244	0	1.00632e-05	0	0	1.53615e-05	0	0
245	0	2.25818e-05	0	0	1.64648e-05	0	0
246	0	4.96786e-05	0	0	1.60324e-05	0	0
247	0	9.96784e-05	0	0	1.29353e-05	0	0
248	0	0.000178142	0	0	6.36363e-06	0	0
249	0	0.000280681	0	0	0	0	0
250	0	0.000388247	0	0	0	0	0
251	0	0.000471843	0	0	0	0	0
252	0	0.00050318	0	0	0	0	0
253	0	0.000471144	0	0	0	0	0
254	0	0.000388615	0	0	0	0	0
255	0	0.000284176	0	0	4.97721e-06	0	0
256	0	0.000187117	0	0	1.61779e-05	0	0
257	0	0.000115912	0	0	2.36009e-05	0	0
258	0	7.35177e-05	0	0	2.6992e-05	0	0
[truncated: 3,742 more rows]
[truncated: 74 more columns]

## Sheet: 8 Sources
Reconstructed Source Distributions											Compare Input & Reconstructed Sink Samples					Sink Sample Weights
[truncated: 4,002 more rows]
[truncated: 75 more columns]

[truncated: 23 more sheets: 8 sources transpose, 9 Sources, 10 Sources, 11 Sources, 12 Sources, 13 Sources, 14 Sources, 15 Sources, 16 Sources, 17 Sources, 18 Sources, 19 Sources, 20 Sources, 21 Sources, 22 Sources, 23 Sources, 24 Sources, 25 Sources, 26 Sources, 27 Sources …]
