# Supplementary material
Source: publisher figshare collection journal article supplement (https://gsapubs.figshare.com/ndownloader/files/23319257)
Supplement: Supplementary file 1 [file 23319257 › FileDR9. KDE_DZnmf_results.xls]

## Sheet: 2 Sources
Reconstructed Source Distributions					Compare Input & Reconstructed Sink Samples					Sink Sample Weights
Age (Ma)	Source 1	Source 2				Mean		St. Dev.			Princeton, Bluestone, Hinton	Surprise Canyon3- 06GC149, Surprise_Cyn2, SurpriseC_Cngl	24PL09, 10JM94, 40JM94, 05PL15, 09LB04	Mauch_Chunk	KY-21-SG	Tonka	Stanley, Hot_spring	BC05	09-CM-699	MS11, MS10	MS01, MSGE313	BC01, BC02, CC01	ML01, MP-DZ1	1QZ19	SY-D, Watahomigi, Manakacha1	Tumbling Run, Pottsville Fm, OH-1-SS	Pocohontas, Lee, VA-1-GN	Racoon, Montevallo, Sewanee	KY-18-CB	OH-4-SN	BCRA-01-10	MB1-3, MB2-4, MB2-2, MB2-3, MB2-5, MB2-1, MB1-2, MB1-1	a16, a23, a29, a38, a48, a49, a50	46-1, 46-2	IB_AD, IB_M1, IB_M2	FCB_AD	FCB_A2	FCB_A1	S3	GS01, GS09	MS04, MS05, MS06	MC05, MC17	GS11, GS24	MC20	EC01, RC01, RC19	V01, V10, V18, V20	V22, 25	DMR01, LC01, SP01, CF02	HT02,HT14, HT04, HT20, HT24
0	1.20579e-09	5.70322e-08			Cross-correlation	0.680892	±	0.211709		Weights Source 1	0.0123674	0.136639	0.180639	0.0455764	0.0777824	0.157202	0.0566821	0.499209	0.0690856	0.364483	0.602353	0.781007	0.0456392	0.223804	0.221038	0.0092192	0.0387393	0.0279564	0.0568504	0.00518084	0.0149195	0.0523206	0.0755159	0.0542467	0.043199	0.0850853	0.0887301	0.0111041	0.0671845	0.465546	0	0.410795	1	0.338201	0.613515	0.843206	0.96797	1	0.200207
1	1.20855e-09	5.71341e-08			Likeness	0.715721	±	0.144229		Weights Source 2	0.987633	0.863361	0.819361	0.954424	0.922218	0.842798	0.943318	0.500791	0.930914	0.635517	0.397647	0.218993	0.954361	0.776196	0.778962	0.990781	0.961261	0.972044	0.94315	0.994819	0.98508	0.947679	0.924484	0.945753	0.956801	0.914915	0.91127	0.988896	0.932816	0.534454	1	0.589205	0	0.661799	0.386485	0.156794	0.0320301	0	0.799793
2	1.21408e-09	5.73381e-08			Kuiper V Value	0.236061	±	0.152504
3	1.22239e-09	5.76442e-08			KS D Value	0.203993	±	0.150382		Cross-correlation	0.820094	0.919416	0.0150094	0.794549	0.924223	0.0126255	0.725932	0.409227	0.766005	0.70332	0.519781	0.713222	0.817943	0.492767	0.644273	0.659868	0.737797	0.833897	0.903673	0.81728	0.846182	0.852505	0.858925	0.844711	0.910775	0.859716	0.939314	0.759323	0.846922	0.751519	0.385472	0.72458	0.812834	0.683686	0.537388	0.398155	0.398449	0.7554	0.693751
4	1.2335e-09	5.80525e-08								Likeness	0.706427	0.843584	0.241124	0.707252	0.833654	0.238968	0.739713	0.552633	0.745292	0.655732	0.603544	0.707832	0.796539	0.708639	0.754614	0.715529	0.641908	0.774586	0.802599	0.70209	0.747627	0.78529	0.836402	0.776505	0.850082	0.775305	0.86107	0.676858	0.803599	0.755798	0.270918	0.745475	0.704999	0.766462	0.677141	0.527852	0.466012	0.676379	0.801336
5	1.24742e-09	5.85633e-08			Number of sink samples	108				Kuiper V Value	0.27817	0.115067	0.756927	0.268687	0.107812	0.75805	0.20252	0.308355	0.223032	0.312722	0.210812	0.204398	0.165764	0.264914	0.221947	0.2235	0.358093	0.184445	0.129002	0.248744	0.166176	0.160988	0.147312	0.200485	0.0816128	0.194906	0.104145	0.196801	0.175085	0.207776	0.667995	0.209916	0.196419	0.203011	0.266807	0.426973	0.499573	0.270557	0.166631
6	1.26418e-09	5.91768e-08			Mean Cross-correlation of sink samples	0.372				KS D Value	0.185297	0.0610589	0.755376	0.249433	0.0578131	0.745461	0.188254	0.255811	0.222883	0.211996	0.137596	0.172705	0.163818	0.263076	0.219718	0.211768	0.23583	0.123405	0.0730956	0.231187	0.161491	0.131027	0.09688	0.117512	0.0636838	0.187951	0.0780045	0.14892	0.137521	0.183692	0.427654	0.176332	0.112717	0.153834	0.236761	0.420176	0.472408	0.204902	0.144142
7	1.28382e-09	5.98932e-08			Range Cross-correlation of sink samples	0.963
8	1.30637e-09	6.07129e-08			Mean Kuiper V value of sink samples	0.408
9	1.33188e-09	6.16363e-08			Range Kuiper V value of sink samples	0.961
10	1.3604e-09	6.26638e-08			Final Residual	0.315123
11	1.39198e-09	6.37959e-08			Number of Iterations	120
12	1.42668e-09	6.50329e-08
13	1.46457e-09	6.63756e-08
14	1.50573e-09	6.78245e-08
15	1.55022e-09	6.93801e-08
16	1.59814e-09	7.10432e-08
17	1.64958e-09	7.28144e-08
18	1.70464e-09	7.46944e-08
19	1.76341e-09	7.6684e-08
20	1.82601e-09	7.8784e-08
21	1.89257e-09	8.09952e-08
22	1.96319e-09	8.33184e-08
23	2.03803e-09	8.57545e-08
24	2.11721e-09	8.83042e-08
25	2.20089e-09	9.09686e-08
26	2.28922e-09	9.37485e-08
27	2.38237e-09	9.66448e-08
28	2.4805e-09	9.96585e-08
29	2.5838e-09	1.0279e-07
30	2.69246e-09	1.06042e-07
31	2.80669e-09	1.09413e-07
32	2.92667e-09	1.12905e-07
33	3.05265e-09	1.1652e-07
34	3.18484e-09	1.20257e-07
35	3.32348e-09	1.24119e-07
36	3.46883e-09	1.28105e-07
37	3.62114e-09	1.32217e-07
38	3.78069e-09	1.36455e-07
39	3.94777e-09	1.40821e-07
40	4.12266e-09	1.45315e-07
41	4.30569e-09	1.49938e-07
42	4.49717e-09	1.54692e-07
43	4.69763e-09	1.59578e-07
44	4.90726e-09	1.64596e-07
45	5.12643e-09	1.69747e-07
46	5.35551e-09	1.7503e-07
47	5.5949e-09	1.80447e-07
48	5.84503e-09	1.85998e-07
49	6.10631e-09	1.91684e-07
50	6.37922e-09	1.97504e-07
51	6.66421e-09	2.0346e-07
52	6.9618e-09	2.09553e-07
53	7.27248e-09	2.15782e-07
54	7.5968e-09	2.22147e-07
55	7.93532e-09	2.2865e-07
56	8.28862e-09	2.3529e-07
57	8.65732e-09	2.42067e-07
58	9.04206e-09	2.48982e-07
59	9.44351e-09	2.56035e-07
60	9.86237e-09	2.63226e-07
61	1.02994e-08	2.70555e-07
62	1.07553e-08	2.78022e-07
63	1.12309e-08	2.85627e-07
64	1.17271e-08	2.93369e-07
65	1.22447e-08	3.0125e-07
66	1.27847e-08	3.09268e-07
67	1.33481e-08	3.17423e-07
68	1.39359e-08	3.25716e-07
69	1.45492e-08	3.34146e-07
70	1.51891e-08	3.42713e-07
71	1.58568e-08	3.51417e-07
72	1.65537e-08	3.60257e-07
73	1.72811e-08	3.69234e-07
74	1.80404e-08	3.78348e-07
75	1.88331e-08	3.87597e-07
76	1.96609e-08	3.96983e-07
77	2.05255e-08	4.06505e-07
78	2.14286e-08	4.16163e-07
79	2.23722e-08	4.25957e-07
80	2.33584e-08	4.35888e-07
81	2.43894e-08	4.45957e-07
82	2.54674e-08	4.56162e-07
83	2.6595e-08	4.66506e-07
84	2.77747e-08	4.76989e-07
85	2.90105e-08	4.87614e-07
86	3.03047e-08	4.98381e-07
87	3.16602e-08	5.0929e-07
88	3.30805e-08	5.20344e-07
89	3.45693e-08	5.31543e-07
90	3.61303e-08	5.42891e-07
91	3.77678e-08	5.54389e-07
92	3.94861e-08	5.6604e-07
93	4.12901e-08	5.77849e-07
94	4.31845e-08	5.89817e-07
95	4.51749e-08	6.01949e-07
96	4.72667e-08	6.1425e-07
97	4.94661e-08	6.26725e-07
98	5.17794e-08	6.39378e-07
99	5.42133e-08	6.52216e-07
100	5.67748e-08	6.65244e-07
101	5.94717e-08	6.78471e-07
102	6.23118e-08	6.91903e-07
103	6.53034e-08	7.05549e-07
104	6.84555e-08	7.19418e-07
105	7.17773e-08	7.33518e-07
106	7.52785e-08	7.47861e-07
107	7.89693e-08	7.62456e-07
108	8.28603e-08	7.77317e-07
109	8.69628e-08	7.92454e-07
110	9.12881e-08	8.0788e-07
111	9.58485e-08	8.23611e-07
112	1.00656e-07	8.3966e-07
113	1.05725e-07	8.56042e-07
114	1.11067e-07	8.72773e-07
115	1.16696e-07	8.89871e-07
116	1.22627e-07	9.07352e-07
117	1.28874e-07	9.25235e-07
118	1.35452e-07	9.43538e-07
119	1.42376e-07	9.62281e-07
120	1.4966e-07	9.81484e-07
121	1.57322e-07	1.00117e-06
122	1.65375e-07	1.02135e-06
123	1.73836e-07	1.04206e-06
124	1.8272e-07	1.06332e-06
125	1.92043e-07	1.08514e-06
126	2.01821e-07	1.10756e-06
127	2.12075e-07	1.13059e-06
128	2.22818e-07	1.15427e-06
129	2.34061e-07	1.17862e-06
130	2.45817e-07	1.20364e-06
131	2.581e-07	1.22938e-06
132	2.70923e-07	1.25585e-06
133	2.84299e-07	1.28307e-06
134	2.98237e-07	1.31107e-06
135	3.1275e-07	1.33987e-06
136	3.27845e-07	1.36949e-06
137	3.43531e-07	1.39995e-06
138	3.59815e-07	1.43127e-06
139	3.76703e-07	1.46348e-06
140	3.94198e-07	1.49659e-06
141	4.12305e-07	1.53062e-06
142	4.31023e-07	1.56559e-06
143	4.50353e-07	1.60151e-06
144	4.70294e-07	1.6384e-06
145	4.90841e-07	1.67627e-06
146	5.11989e-07	1.71515e-06
147	5.33731e-07	1.75503e-06
148	5.56059e-07	1.79593e-06
149	5.78962e-07	1.83787e-06
150	6.02428e-07	1.88085e-06
151	6.26444e-07	1.92488e-06
152	6.50993e-07	1.96997e-06
153	6.76059e-07	2.01613e-06
154	7.01623e-07	2.06336e-06
155	7.27666e-07	2.11167e-06
156	7.54166e-07	2.16107e-06
157	7.81101e-07	2.21157e-06
158	8.08448e-07	2.26316e-06
159	8.36181e-07	2.31586e-06
160	8.64277e-07	2.36967e-06
161	8.92708e-07	2.42461e-06
162	9.2145e-07	2.48067e-06
163	9.50476e-07	2.53788e-06
164	9.79759e-07	2.59623e-06
165	1.00927e-06	2.65576e-06
166	1.03899e-06	2.71646e-06
167	1.0689e-06	2.77837e-06
168	1.09895e-06	2.84149e-06
169	1.12915e-06	2.90588e-06
170	1.15945e-06	2.97155e-06
171	1.18985e-06	3.03852e-06
172	1.22032e-06	3.10683e-06
173	1.25085e-06	3.17652e-06
174	1.28142e-06	3.24763e-06
175	1.31202e-06	3.3202e-06
176	1.34266e-06	3.39431e-06
177	1.37332e-06	3.46999e-06
178	1.40403e-06	3.54732e-06
179	1.43482e-06	3.62636e-06
180	1.46574e-06	3.70718e-06
181	1.49691e-06	3.78986e-06
182	1.52851e-06	3.87446e-06
183	1.56086e-06	3.96104e-06
184	1.59447e-06	4.04964e-06
185	1.63013e-06	4.14027e-06
186	1.6691e-06	4.23289e-06
187	1.71323e-06	4.3274e-06
188	1.7652e-06	4.42356e-06
189	1.82881e-06	4.52104e-06
190	1.90922e-06	4.61932e-06
191	2.01323e-06	4.71765e-06
192	2.14945e-06	4.81508e-06
193	2.32836e-06	4.91042e-06
194	2.5621e-06	5.00226e-06
195	2.86398e-06	5.08906e-06
196	3.24761e-06	5.16925e-06
197	3.72562e-06	5.24142e-06
198	4.308e-06	5.30451e-06
199	5.0002e-06	5.35813e-06
200	5.80112e-06	5.40274e-06
201	6.7014e-06	5.43998e-06
202	7.6821e-06	5.47275e-06
203	8.71438e-06	5.50536e-06
204	9.76013e-06	5.54334e-06
205	1.0774e-05	5.59328e-06
206	1.17063e-05	5.66234e-06
207	1.25073e-05	5.75778e-06
208	1.31315e-05	5.88632e-06
209	1.35425e-05	6.05355e-06
210	1.37161e-05	6.26344e-06
211	1.36411e-05	6.51846e-06
212	1.33253e-05	6.81849e-06
213	1.27952e-05	7.16079e-06
214	1.20874e-05	7.5415e-06
215	1.1247e-05	7.95562e-06
216	1.03239e-05	8.39762e-06
217	9.36766e-06	8.862e-06
218	8.42384e-06	9.34384e-06
219	7.53072e-06	9.83923e-06
220	6.71737e-06	1.03455e-05
221	6.00292e-06	1.08612e-05
222	5.39694e-06	1.13862e-05
223	4.90068e-06	1.19215e-05
224	4.50887e-06	1.24687e-05
225	4.21168e-06	1.30301e-05
226	3.99669e-06	1.36082e-05
227	3.8506e-06	1.42055e-05
228	3.76059e-06	1.4824e-05
229	3.71531e-06	1.54657e-05
230	3.70551e-06	1.6132e-05
231	3.72445e-06	1.68237e-05
232	3.76803e-06	1.7541e-05
233	3.83495e-06	1.82837e-05
234	3.92666e-06	1.90509e-05
235	4.04736e-06	1.98411e-05
236	4.20394e-06	2.06522e-05
237	4.40575e-06	2.14819e-05
238	4.66426e-06	2.23271e-05
239	4.99235e-06	2.31847e-05
240	5.40336e-06	2.40513e-05
241	5.90971e-06	2.49237e-05
242	6.52117e-06	2.5799e-05
243	7.24292e-06	2.6675e-05
244	8.07351e-06	2.75504e-05
245	9.00315e-06	2.84253e-05
246	1.00124e-05	2.93013e-05
247	1.10719e-05	3.01813e-05
248	1.21431e-05	3.107e-05
249	1.318e-05	3.19732e-05
250	1.41327e-05	3.28973e-05
251	1.49511e-05	3.38495e-05
252	1.55898e-05	3.48362e-05
253	1.60102e-05	3.58635e-05
254	1.61867e-05	3.6936e-05
255	1.61149e-05	3.80554e-05
256	1.58034e-05	3.9222e-05
257	1.52761e-05	4.04345e-05
258	1.4569e-05	4.16896e-05
259	1.37273e-05	4.29833e-05
260	1.28001e-05	4.43108e-05
261	1.18365e-05	4.56676e-05
262	1.08812e-05	4.70496e-05
263	9.97142e-06	4.84537e-05
264	9.13538e-06	4.98777e-05
265	8.39122e-06	5.13212e-05
266	7.74757e-06	5.27843e-05
267	7.20484e-06	5.42686e-05
268	6.75691e-06	5.57763e-05
269	6.39317e-06	5.73101e-05
270	6.10044e-06	5.88729e-05
271	5.86459e-06	6.04678e-05
272	5.67183e-06	6.20977e-05
273	5.50963e-06	6.37653e-05
274	5.36719e-06	6.54731e-05
275	5.23571e-06	6.72231e-05
276	5.10838e-06	6.90173e-05
277	4.98027e-06	7.08572e-05
278	4.84821e-06	7.27442e-05
279	4.71067e-06	7.46793e-05
280	4.5677e-06	7.66632e-05
281	4.42095e-06	7.86966e-05
282	4.27377e-06	8.07795e-05
283	4.13135e-06	8.29119e-05
284	4.00094e-06	8.5093e-05
285	3.89188e-06	8.7322e-05
286	3.81562e-06	8.95973e-05
287	3.78548e-06	9.1917e-05
288	3.81602e-06	9.42789e-05
289	3.92215e-06	9.66806e-05
290	4.11774e-06	9.91195e-05
291	4.41391e-06	0.000101593
292	4.81713e-06	0.0001041
293	5.32718e-06	0.000106639
294	5.93556e-06	0.00010921
295	6.62461e-06	0.000111813
296	7.36633e-06	0.000114453
297	8.12278e-06	0.000117132
298	8.85126e-06	0.000119855
299	9.5065e-06	0.000122626
300	1.00451e-05	0.00012545
301	1.04302e-05	0.000128332
302	1.06361e-05	0.000131273
303	1.06516e-05	0.000134274
304	1.0483e-05	0.000137334
305	1.01536e-05	0.00014045
306	9.70326e-06	0.000143615
307	9.18512e-06	0.000146822
308	8.66107e-06	0.000150062
309	8.19677e-06	0.000153326
310	7.85619e-06	0.000156606
311	7.69658e-06	0.000159892
312	7.76414e-06	0.000163179
313	8.09088e-06	0.000166461
314	8.6927e-06	0.000169737
315	9.5687e-06	0.000173004
316	1.07017e-05	0.000176266
317	1.20599e-05	0.000179526
318	1.35992e-05	0.00018279
319	1.52661e-05	0.000186064
320	1.70014e-05	0.000189356
321	1.87438e-05	0.000192675
322	2.04333e-05	0.000196028
323	2.20148e-05	0.000199424
324	2.34403e-05	0.000202867
325	2.46713e-05	0.000206364
326	2.56794e-05	0.000209919
327	2.64466e-05	0.000213533
328	2.69644e-05	0.000217207
329	2.72323e-05	0.000220943
330	2.72558e-05	0.000224738
331	2.7045e-05	0.000228592
332	2.66128e-05	0.000232503
333	2.59735e-05	0.000236472
334	2.51423e-05	0.000240498
335	2.41352e-05	0.00024458
336	2.29689e-05	0.000248721
337	2.16606e-05	0.000252922
338	2.02273e-05	0.000257185
339	1.86908e-05	0.000261514
340	1.70704e-05	0.00026591
341	1.53843e-05	0.000270378
342	1.36484e-05	0.000274921
343	1.18756e-05	0.000279542
344	1.00736e-05	0.000284244
345	8.24483e-06	0.000289031
346	6.38475e-06	0.000293903
347	4.48198e-06	0.000298862
348	2.51833e-06	0.000303908
349	4.69621e-07	0.00030904
350	0	0.00031398
351	0	0.000318901
352	0	0.000323872
353	0	0.000328886
354	0	0.000333936
355	0	0.000339018
356	0	0.000344131
357	0	0.000349276
358	0	0.000354459
359	0	0.000359686
360	0	0.000364969
361	0	0.000370319
362	0	0.00037575
363	0	0.000381278
364	0	0.000386916
365	0	0.000392678
366	0	0.000398578
367	0	0.000404629
368	0	0.000410842
369	0	0.000417229
370	0	0.000423801
371	0	0.000430568
372	0	0.00043754
373	0	0.000444727
374	0	0.00045214
375	0	0.000459789
376	0	0.000467684
377	0	0.000475833
378	0	0.000484247
379	0	0.000492934
380	0	0.000501907
381	0	0.000511168
382	0	0.000520722
383	0	0.000530573
384	0	0.000540723
385	0	0.000551173
386	0	0.000561922
387	0	0.000572967
388	0	0.000584302
389	0	0.000595918
390	0	0.000607805
391	0	0.000619948
392	0	0.000632331
393	0	0.000644933
394	0	0.00065773
395	0	0.000670695
396	0	0.000683797
397	0	0.000697001
398	0	0.00071027
399	0	0.000723564
400	0	0.000736837
401	0	0.000750043
402	0	0.000763132
403	0	0.000776054
404	0	0.000788756
405	0	0.000801184
406	0	0.000813284
407	0	0.000825003
408	0	0.000836288
409	0	0.000847089
410	0	0.000857356
411	0	0.000867046
412	0	0.000876115
413	0	0.000884528
414	0	0.000892251
415	0	0.000899258
416	0	0.000905527
417	0	0.000911041
418	0	0.000915791
419	0	0.000919773
420	0	0.000922986
421	0	0.000925439
422	0	0.000927127
423	0	0.000928081
424	0	0.000928323
425	0	0.000927875
426	0	0.000926765
427	0	0.000925022
428	0	0.000922675
429	0	0.000919758
430	0	0.000916301
431	0	0.00091234
432	0	0.000907906
433	0	0.000903033
434	0	0.000897752
435	0	0.000892095
436	0	0.000886092
437	0	0.000879769
438	0	0.000873154
439	0	0.000866271
440	0	0.000859142
441	0	0.000851788
442	0	0.00084423
443	0	0.000836484
444	0	0.000828568
445	0	0.000820499
446	0	0.00081229
447	0	0.000803957
448	0	0.000795512
449	0	0.000786967
450	0	0.000778333
451	0	0.000769617
452	0	0.000760826
453	0	0.000751964
454	0	0.000743033
455	0	0.000734034
456	0	0.000724966
457	0	0.00071583
458	0	0.000706626
459	0	0.000697357
460	0	0.000688026
461	0	0.000678639
462	0	0.000669207
463	0	0.000659739
464	0	0.000650249
465	0	0.000640752
466	0	0.000631263
467	0	0.000621798
468	0	0.000612371
469	0	0.000602995
470	0	0.000593684
471	0	0.000584449
472	0	0.000575299
473	0	0.000566243
474	0	0.000557288
475	0	0.000548441
476	0	0.000539707
477	0	0.000531091
478	0	0.000522598
479	0	0.000514232
480	0	0.000505997
481	0	0.000497897
482	0	0.000489936
483	0	0.000482117
484	0	0.000474445
485	0	0.000466924
486	0	0.000459558
487	4.36885e-06	0.000451639
488	1.10347e-05	0.00044351
489	1.42581e-05	0.000436112
490	1.62726e-05	0.000429088
491	2.03311e-05	0.000421911
492	2.90886e-05	0.000414154
493	4.34281e-05	0.000405679
494	6.2135e-05	0.000396692
495	8.24947e-05	0.000387642
496	0.00010165	0.000379003
497	0.00011816	0.000371018
498	0.00013288	0.000363555
499	0.000148624	0.000356162
500	0.000168984	0.000348258
501	0.000197291	0.000339309
502	0.000236276	0.000328873
503	0.000288129	0.000316601
504	0.000354133	0.000302286
505	0.000433607	0.000286045
506	0.00052302	0.000268463
507	0.000616065	0.000250566
508	0.000706933	0.000233303
509	0.00079354	0.000217013
510	0.000879118	0.000201165
511	0.000970772	0.000184594
512	0.00107577	0.000166106
513	0.00119801	0.00014506
514	0.00133673	0.000121567
515	0.00148831	9.62063e-05
516	0.00165017	6.93876e-05
517	0.0018247	4.07043e-05
518	0.00202032	8.76772e-06
519	0.00222376	0
520	0.00245142	0
521	0.0027051	0
522	0.00297013	0
523	0.00322973	0
524	0.0034733	0
525	0.00370007	0
526	0.00391601	0
527	0.004127	0
528	0.00433252	0
529	0.00452203	0
530	0.00467515	0
531	0.0047665	0
532	0.00477454	0
533	0.00468911	0
534	0.00451246	0
535	0.00425426	0
536	0.00392725	0
537	0.00354835	0
538	0.00314187	0
539	0.0027382	0
540	0.00236617	0
541	0.00202121	2.78254e-05
542	0.00171216	7.92273e-05
543	0.00146052	0.000121265
544	0.00125135	0.000156382
545	0.00106815	0.000187276
546	0.000898152	0.000216037
547	0.000735793	0.000243575
548	0.000583871	0.000269439
549	0.000451192	0.000292192
550	0.000347543	0.000310238
551	0.000278464	0.000322671
552	0.000241417	0.000329906
553	0.000226042	0.000333629
554	0.000218712	0.000336063
555	0.000208811	0.000338938
556	0.000192752	0.000342836
557	0.000173359	0.000347294
558	0.00015567	0.00035149
559	0.000142586	0.000354953
560	0.000133275	0.000357823
561	0.000124774	0.000360589
562	0.000114849	0.000363624
563	0.00010363	0.000366914
564	9.28838e-05	0.000370179
565	8.39569e-05	0.000373208
566	7.64791e-05	0.000376067
567	6.8915e-05	0.000379009
568	6.01555e-05	0.000382218
569	5.05124e-05	0.00038564
570	4.13746e-05	0.000389046
571	3.41598e-05	0.000392198
572	2.96157e-05	0.000394963
573	2.78761e-05	0.000397312
574	2.88797e-05	0.000399242
575	3.25325e-05	0.000400759
576	3.83619e-05	0.000401931
577	4.49789e-05	0.000402975
578	5.00052e-05	0.000404276
579	5.08736e-05	0.000406248
580	4.61484e-05	0.000409125
581	3.63898e-05	0.000412817
582	2.38357e-05	0.000416963
583	1.11442e-05	0.000421131
584	1.59498e-07	0.000425025
585	0	0.00042716
586	0	0.000429277
587	0	0.000431403
588	0	0.000433535
589	0	0.000435665
590	0	0.000437785
591	0	0.000439883
592	0	0.000441945
593	0	0.000443957
594	0	0.000445901
595	0	0.000447759
596	0	0.000449514
597	0	0.000451147
598	0	0.000452639
599	0	0.000453973
600	0	0.000455131
601	0	0.000456095
602	0	0.000456851
603	0	0.000457382
604	0	0.000457675
605	0	0.000457718
606	0	0.0004575
607	0	0.000457011
608	0	0.000456243
609	0	0.000455191
610	0	0.000453852
611	0	0.000452223
612	0	0.000450304
613	0	0.000448098
614	0	0.000445607
615	0	0.000442839
616	0	0.0004398
617	0	0.000436499
618	0	0.000432948
619	0	0.000429158
620	0	0.000425141
621	0	0.000420913
622	0	0.000416487
623	0	0.00041188
624	0	0.000407106
625	0	0.000402181
626	0	0.000397122
627	0	0.000391942
628	0	0.000386657
629	0	0.00038128
630	0	0.000375825
631	0	0.000370302
632	0	0.000364724
633	0	0.000359098
634	0	0.000353435
635	0	0.000347741
636	0	0.000342022
637	0	0.000336285
638	0	0.000330532
639	0	0.000324769
640	0	0.000318998
641	0	0.000313221
642	0	0.000307443
643	0	0.000301665
644	0	0.000295891
645	0	0.000290123
646	0	0.000284366
647	0	0.000278622
648	0	0.000272897
649	0	0.000267195
650	0	0.000261522
651	0	0.000255881
652	0	0.00025028
653	0	0.000244724
654	0	0.000239219
655	0	0.000233771
656	0	0.000228386
657	0	0.00022307
658	0	0.000217828
659	0	0.000212665
660	0	0.000207585
661	0	0.000202595
662	0	0.000197696
663	0	0.000192894
664	0	0.000188191
665	0	0.00018359
666	0	0.000179093
667	0	0.000174702
668	0	0.000170418
669	0	0.000166244
670	0	0.000162179
671	0	0.000158224
672	0	0.00015438
673	0	0.000150646
674	0	0.000147023
675	0	0.000143512
676	0	0.00014011
677	0	0.000136817
678	0	0.000133631
679	0	0.000130551
680	0	0.000127576
681	0	0.000124705
682	0	0.000121936
683	0	0.000119267
684	0	0.000116697
685	0	0.000114223
686	0	0.000111844
687	0	0.000109557
688	0	0.00010736
689	0	0.000105251
690	0	0.000103226
691	0	0.000101284
692	0	9.9421e-05
693	0	9.76347e-05
694	0	9.59222e-05
695	0	9.42804e-05
696	0	9.27063e-05
697	0	9.11969e-05
698	0	8.97492e-05
699	0	8.83603e-05
700	0	8.70274e-05
701	0	8.57476e-05
702	0	8.45184e-05
703	0	8.33373e-05
704	0	8.22019e-05
705	0	8.11101e-05
706	0	8.00601e-05
707	0	7.90501e-05
708	0	7.80786e-05
709	0	7.71443e-05
710	0	7.6246e-05
711	0	7.53828e-05
712	0	7.45538e-05
713	0	7.37583e-05
714	0	7.29958e-05
715	0	7.22655e-05
716	0	7.15673e-05
717	0	7.09008e-05
718	0	7.0265e-05
719	0	6.96593e-05
720	0	6.9083e-05
721	0	6.85354e-05
722	0	6.80158e-05
723	0	6.75232e-05
724	0	6.70569e-05
725	0	6.66158e-05
726	0	6.61991e-05
727	0	6.58058e-05
728	0	6.54352e-05
729	0	6.50863e-05
730	0	6.47585e-05
731	0	6.44512e-05
732	0	6.4164e-05
733	0	6.38964e-05
734	0	6.36482e-05
735	0	6.34195e-05
736	0	6.32101e-05
737	0	6.30202e-05
738	0	6.28498e-05
739	0	6.26991e-05
740	0	6.25682e-05
741	0	6.24571e-05
742	0	6.23657e-05
743	0	6.22936e-05
744	0	6.22404e-05
745	0	6.22053e-05
746	0	6.21874e-05
747	0	6.21852e-05
748	0	6.21972e-05
749	0	6.22216e-05
750	0	6.22561e-05
751	0	6.22984e-05
752	0	6.23457e-05
753	0	6.23954e-05
754	0	6.24442e-05
755	0	6.24893e-05
756	0	6.25274e-05
757	0	6.25554e-05
758	0	6.25702e-05
759	0	6.25685e-05
760	0	6.25479e-05
761	0	6.25057e-05
762	0	6.24396e-05
763	0	6.23478e-05
764	0	6.22286e-05
765	0	6.20805e-05
766	0	6.19027e-05
767	0	6.16947e-05
768	0	6.14562e-05
769	0	6.11875e-05
770	0	6.08891e-05
771	0	6.05619e-05
772	0	6.02073e-05
773	0	5.98268e-05
774	0	5.94223e-05
775	0	5.8996e-05
776	0	5.85502e-05
777	0	5.80876e-05
778	0	5.76108e-05
779	0	5.71228e-05
780	0	5.66267e-05
781	0	5.61254e-05
782	0	5.56222e-05
783	0	5.51202e-05
784	0	5.46224e-05
785	0	5.4132e-05
786	0	5.3652e-05
787	0	5.31853e-05
788	0	5.27347e-05
789	0	5.23028e-05
790	0	5.18922e-05
791	0	5.15051e-05
792	0	5.11438e-05
793	0	5.081e-05
794	0	5.05054e-05
795	0	5.02316e-05
796	0	4.99896e-05
797	0	4.97806e-05
798	0	4.96052e-05
799	0	4.94639e-05
800	0	4.9357e-05
801	0	4.92853e-05
802	0	4.92479e-05
803	0	4.92442e-05
804	0	4.92737e-05
805	0	4.93357e-05
806	2.53034e-07	4.9388e-05
807	9.68456e-07	4.93952e-05
808	1.66815e-06	4.94343e-05
809	2.34589e-06	4.9505e-05
810	2.99556e-06	4.96069e-05
811	3.6113e-06	4.97395e-05
812	4.18762e-06	4.99021e-05
813	4.71944e-06	5.0094e-05
814	5.20227e-06	5.03142e-05
815	5.6322e-06	5.05618e-05
816	6.00595e-06	5.08356e-05
817	6.32098e-06	5.11342e-05
818	6.5754e-06	5.14563e-05
819	6.76803e-06	5.18002e-05
820	6.89834e-06	5.21644e-05
821	6.96641e-06	5.2547e-05
822	6.9729e-06	5.29463e-05
823	6.91894e-06	5.33605e-05
824	6.8061e-06	5.37877e-05
825	6.63628e-06	5.42262e-05
826	6.41166e-06	5.46742e-05
827	6.13461e-06	5.51301e-05
828	5.80765e-06	5.55925e-05
829	5.43339e-06	5.60601e-05
830	5.01449e-06	5.65317e-05
831	4.55362e-06	5.70067e-05
832	4.05346e-06	5.74844e-05
833	3.51671e-06	5.79646e-05
834	2.94607e-06	5.84473e-05
835	2.34427e-06	5.8933e-05
836	1.7141e-06	5.94223e-05
837	1.05843e-06	5.99162e-05
838	3.80231e-07	6.0416e-05
839	0	6.08715e-05
840	0	6.12716e-05
841	0	6.16809e-05
842	0	6.21023e-05
843	0	6.25391e-05
844	0	6.29942e-05
845	0	6.34707e-05
846	0	6.39719e-05
847	0	6.45011e-05
848	0	6.50615e-05
849	0	6.56562e-05
850	0	6.62883e-05
851	0	6.69608e-05
852	0	6.76765e-05
853	0	6.84381e-05
854	0	6.92481e-05
855	0	7.01089e-05
856	0	7.10226e-05
857	0	7.19915e-05
858	0	7.30172e-05
859	0	7.41018e-05
860	0	7.52467e-05
861	0	7.64536e-05
862	0	7.77239e-05
863	0	7.90589e-05
864	0	8.04599e-05
865	0	8.19282e-05
866	0	8.3465e-05
867	0	8.50713e-05
868	0	8.67483e-05
869	0	8.84971e-05
870	0	9.03188e-05
871	0	9.22144e-05
872	0	9.41852e-05
873	0	9.62321e-05
874	0	9.83563e-05
875	0	0.000100559
876	0	0.000102841
877	0	0.000105203
878	0	0.000107647
879	0	0.000110173
880	0	0.000112782
881	0	0.000115475
882	0	0.000118251
883	0	0.000121112
884	0	0.000124056
885	0	0.000127085
886	0	0.000130197
887	0	0.00013339
888	0	0.000136664
889	0	0.000140015
890	0	0.000143443
891	0	0.000146944
892	0	0.000150516
893	0	0.000154156
894	0	0.000157862
895	0	0.00016163
896	0	0.000165458
897	0	0.000169344
898	0	0.000173285
899	0	0.000177279
900	0	0.000181326
901	0	0.000185423
902	0	0.000189572
903	0	0.000193772
904	0	0.000198025
905	0	0.000202332
906	0	0.000206696
907	0	0.000211119
908	0	0.000215605
909	0	0.000220159
910	0	0.000224783
911	0	0.000229485
912	0	0.000234267
913	0	0.000239135
914	0	0.000244094
915	0	0.00024915
916	0	0.000254305
917	0	0.000259566
918	0	0.000264935
919	0	0.000270416
920	0	0.000276012
921	0	0.000281725
922	0	0.000287557
923	0	0.000293508
924	0	0.00029958
925	0	0.000305771
926	0	0.000312082
927	0	0.000318511
928	0	0.000325057
929	0	0.000331717
930	0	0.000338487
931	0	0.000345366
932	0	0.00035235
933	0	0.000359437
934	0	0.000366624
935	0	0.000373908
936	0	0.000381289
937	0	0.000388763
938	0	0.00039633
939	0	0.000403988
940	0	0.000411738
941	0	0.00041958
942	0	0.000427515
943	0	0.000435543
944	0	0.000443667
945	0	0.000451888
946	0	0.000460209
947	0	0.000468633
948	0	0.000477163
949	0	0.000485804
950	0	0.00049456
951	0	0.000503437
952	0	0.000512442
953	0	0.000521583
954	0	0.000530867
955	0	0.000540303
956	0	0.000549902
957	0	0.000559671
958	0	0.00056962
959	0	0.000579756
960	0	0.000590085
961	0	0.000600611
962	0	0.000611336
963	0	0.000622263
964	0	0.000633389
965	0	0.000644714
966	0	0.000656237
967	0	0.000667956
968	0	0.000679873
969	0	0.000691993
970	0	0.000704319
971	0	0.000716854
972	0	0.000729607
973	0	0.000742585
974	0	0.000755796
975	0	0.000769247
976	0	0.000782946
977	0	0.000796895
978	0	0.000811097
979	0	0.000825551
980	0	0.000840255
981	0	0.000855204
982	0	0.000870391
983	0	0.000885807
984	0	0.000901443
985	0	0.00091729
986	0	0.000933336
987	0	0.000949571
988	0	0.000965985
989	0	0.000982569
990	0	0.000999314
991	0	0.00101621
992	0	0.00103326
993	0	0.00105044
994	0	0.00106775
995	0	0.00108519
996	0	0.00110275
997	0	0.00112042
998	0	0.00113818
999	0	0.00115603
1000	0	0.00117396
1001	0	0.00119194
1002	0	0.00120997
1003	0	0.00122802
1004	0	0.00124607
1005	0	0.00126411
1006	0	0.0012821
1007	0	0.00130003
1008	0	0.00131789
1009	0	0.00133564
1010	0	0.00135328
1011	0	0.0013708
1012	0	0.00138819
1013	0	0.00140545
1014	0	0.00142258
1015	0	0.00143959
1016	0	0.00145646
1017	0	0.00147322
1018	0	0.00148986
1019	0	0.00150638
1020	0	0.00152278
1021	0	0.00153903
1022	0	0.00155514
1023	0	0.00157106
1024	0	0.00158679
1025	0	0.00160229
1026	0	0.00161752
1027	0	0.00163247
1028	0	0.00164708
1029	0	0.00166134
1030	0	0.00167522
1031	0	0.00168869
1032	0	0.00170174
1033	0	0.00171434
1034	0	0.00172649
1035	0	0.00173816
1036	0	0.00174936
1037	0	0.00176008
1038	0	0.00177031
1039	0	0.00178006
1040	0	0.00178933
1041	0	0.00179811
1042	0	0.00180642
1043	0	0.00181428
1044	0	0.00182168
1045	0	0.00182866
1046	0	0.00183522
1047	0	0.0018414
1048	0	0.00184721
1049	0	0.00185267
1050	0	0.00185783
1051	0	0.0018627
1052	0	0.00186731
1053	0	0.00187169
1054	0	0.00187586
1055	0	0.00187985
1056	0	0.00188365
1057	0	0.00188729
1058	0	0.00189075
1059	0	0.00189402
1060	0	0.00189709
1061	0	0.00189993
1062	0	0.00190252
1063	0	0.00190483
1064	0	0.00190683
1065	0	0.00190853
1066	0	0.0019099
1067	0	0.00191096
1068	0	0.0019117
1069	0	0.00191215
1070	0	0.00191231
1071	0	0.0019122
1072	0	0.00191182
1073	0	0.00191118
1074	0	0.00191027
1075	0	0.00190907
1076	0	0.00190754
1077	0	0.00190566
1078	0	0.00190338
1079	0	0.00190067
1080	0	0.00189749
1081	0	0.0018938
1082	0	0.00188957
1083	0	0.00188479
1084	0	0.00187943
1085	0	0.00187349
1086	0	0.00186695
1087	0	0.00185982
1088	0	0.0018521
1089	0	0.00184379
1090	0	0.0018349
1091	0	0.00182545
1092	0	0.00181546
1093	0	0.00180496
1094	0	0.001794
1095	0	0.00178262
1096	0	0.00177087
1097	0	0.00175882
1098	0	0.00174655
1099	0	0.00173412
1100	0	0.0017216
1101	0	0.00170903
1102	0	0.00169649
1103	0	0.00168399
1104	0	0.00167157
1105	0	0.00165925
1106	0	0.00164703
1107	0	0.00163492
1108	0	0.0016229
1109	0	0.00161097
1110	0	0.00159913
1111	0	0.00158737
1112	0	0.0015757
1113	0	0.00156414
1114	0	0.00155269
1115	0	0.0015414
1116	0	0.00153028
1117	0	0.00151939
1118	0	0.00150874
1119	0	0.00149838
1120	0	0.00148833
1121	0	0.00147863
1122	0	0.00146929
1123	0	0.00146033
1124	0	0.00145175
1125	0	0.00144357
1126	0	0.00143578
1127	0	0.00142836
1128	0	0.00142132
1129	0	0.00141464
1130	0	0.00140831
1131	0	0.00140231
1132	0	0.00139661
1133	0	0.00139119
1134	0	0.00138604
1135	0	0.00138111
1136	0	0.00137637
1137	0	0.00137178
1138	0	0.00136731
1139	0	0.0013629
1140	0	0.00135851
1141	0	0.00135409
1142	0	0.00134961
1143	0	0.00134502
1144	0	0.0013403
1145	0	0.0013354
1146	0	0.00133032
1147	0	0.00132504
1148	0	0.00131955
1149	0	0.00131384
1150	0	0.00130791
1151	0	0.00130177
1152	0	0.00129543
1153	0	0.00128889
1154	0	0.00128216
1155	0	0.00127527
1156	0	0.00126821
1157	0	0.00126101
1158	0	0.00125367
1159	0	0.0012462
1160	0	0.00123861
1161	0	0.0012309
1162	0	0.00122309
1163	0	0.00121517
1164	0	0.00120714
1165	0	0.00119902
1166	0	0.00119079
1167	0	0.00118245
1168	0	0.00117401
1169	0	0.00116547
1170	0	0.00115682
1171	0	0.00114806
1172	0	0.0011392
1173	0	0.00113024
1174	0	0.00112118
1175	0	0.00111204
1176	0	0.00110283
1177	0	0.00109356
1178	0	0.00108426
1179	0	0.00107493
1180	0	0.0010656
1181	0	0.0010563
1182	0	0.00104705
1183	0	0.00103786
1184	0	0.00102876
1185	0	0.00101976
1186	0	0.00101086
1187	0	0.00100208
1188	0	0.000993411
1189	0	0.000984862
1190	0	0.000976423
1191	0	0.000968088
1192	0	0.000959848
1193	0	0.000951694
1194	0	0.000943615
1195	0	0.000935602
1196	0	0.000927649
1197	0	0.000919751
1198	0	0.000911902
1199	0	0.000904102
1200	0	0.000896351
1201	0	0.000888648
1202	0	0.000880996
1203	0	0.000873395
1204	0	0.000865845
1205	0	0.000858346
1206	0	0.000850896
1207	0	0.000843494
1208	0	0.000836137
1209	0	0.000828822
1210	0	0.000821547
1211	0	0.000814313
1212	0	0.000807119
1213	0	0.000799968
1214	0	0.000792865
1215	0	0.000785814
1216	0	0.000778823
1217	0	0.0007719
1218	0	0.000765053
1219	0	0.000758289
1220	0	0.000751615
1221	0	0.000745039
1222	0	0.000738566
1223	0	0.000732198
1224	0	0.000725936
1225	0	0.000719781
1226	0	0.00071373
1227	0	0.000707781
1228	0	0.000701929
1229	0	0.000696169
1230	0	0.000690498
1231	0	0.000684912
1232	0	0.000679407
1233	0	0.000673984
1234	0	0.000668642
1235	0	0.000663383
1236	0	0.00065821
1237	0	0.000653128
1238	0	0.000648137
1239	0	0.000643242
1240	0	0.000638441
1241	0	0.000633735
1242	0	0.000629121
1243	0	0.000624594
1244	0	0.000620152
1245	0	0.000615791
1246	0	0.000611507
1247	0	0.000607299
1248	0	0.000603168
1249	0	0.000599117
1250	0	0.000595148
1251	0	0.000591268
1252	0	0.00058748
1253	0	0.00058379
1254	0	0.0005802
1255	0	0.000576712
1256	0	0.000573325
1257	0	0.000570037
1258	0	0.000566843
1259	0	0.000563737
1260	0	0.000560712
1261	0	0.000557761
1262	0	0.000554878
1263	0	0.000552055
1264	0	0.00054929
1265	0	0.00054658
1266	0	0.000543923
1267	0	0.000541319
1268	0	0.000538772
1269	0	0.000536284
1270	0	0.000533861
1271	0	0.000531508
1272	0	0.000529229
1273	0	0.000527032
1274	0	0.000524922
1275	0	0.000522904
1276	0	0.000520985
1277	0	0.000519168
1278	0	0.000517459
1279	0	0.000515861
1280	0	0.000514377
1281	0	0.000513009
1282	0	0.000511756
1283	0	0.000510618
1284	0	0.000509592
1285	0	0.000508674
1286	0	0.000507859
1287	0	0.000507141
1288	0	0.000506513
1289	0	0.00050597
1290	0	0.000505505
1291	0	0.000505116
1292	0	0.000504802
1293	0	0.000504563
1294	0	0.000504406
1295	0	0.000504336
1296	0	0.000504364
1297	0	0.0005045
1298	0	0.000504757
1299	0	0.000505148
1300	0	0.000505684
1301	0	0.000506378
1302	0	0.000507239
1303	0	0.000508274
1304	0	0.000509488
1305	0	0.000510885
1306	0	0.000512466
1307	0	0.000514224
1308	0	0.000516149
1309	5.62821e-06	0.000517311
1310	1.21969e-05	0.000518456
1311	1.92293e-05	0.00051964
1312	2.65442e-05	0.000520869
1313	3.39344e-05	0.000522148
1314	4.11807e-05	0.000523484
1315	4.80683e-05	0.000524883
1316	5.44051e-05	0.00052635
1317	6.00384e-05	0.000527886
1318	6.48687e-05	0.000529488
1319	6.88584e-05	0.000531149
1320	7.20344e-05	0.000532856
1321	7.44843e-05	0.000534592
1322	7.63461e-05	0.000536337
1323	7.7794e-05	0.000538068
1324	7.90214e-05	0.000539761
1325	8.02232e-05	0.000541392
1326	8.15802e-05	0.000542941
1327	8.32463e-05	0.00054439
1328	8.53401e-05	0.000545723
1329	8.79416e-05	0.000546932
1330	9.10921e-05	0.00054801
1331	9.47991e-05	0.000548955
1332	9.90429e-05	0.000549766
1333	0.000103785	0.000550446
1334	0.000108978	0.000550996
1335	0.000114573	0.000551416
1336	0.000120523	0.000551706
1337	0.000126791	0.000551865
1338	0.000133343	0.00055189
1339	0.000140149	0.000551782
1340	0.00014717	0.000551543
1341	0.000154351	0.000551184
1342	0.000161616	0.000550722
1343	0.000168862	0.000550181
1344	0.00017597	0.000549596
1345	0.00018281	0.000549002
1346	0.000189269	0.000548439
1347	0.000195265	0.00054794
1348	0.000200769	0.000547531
1349	0.000205832	0.000547224
1350	0.000210576	0.000547018
1351	0.000215177	0.000546898
1352	0.00021984	0.00054684
1353	0.000224772	0.000546817
1354	0.000230145	0.000546799
1355	0.000236075	0.000546762
1356	0.000242597	0.000546691
1357	0.000249667	0.000546576
1358	0.000257167	0.000546418
1359	0.000264924	0.000546224
1360	0.000272735	0.000546004
1361	0.0002804	0.00054577
1362	0.000287744	0.000545532
1363	0.000294646	0.000545297
1364	0.000301051	0.000545066
1365	0.000306982	0.000544834
1366	0.000312536	0.000544592
1367	0.000317877	0.000544324
1368	0.00032322	0.00054401
1369	0.000328811	0.000543629
1370	0.000334903	0.000543157
1371	0.000341743	0.000542571
1372	0.000349551	0.000541851
1373	0.000358516	0.000540975
1374	0.000368796	0.000539927
1375	0.000380529	0.000538687
1376	0.000393847	0.000537237
1377	0.000408896	0.000535556
1378	0.000425861	0.000533617
1379	0.000444976	0.000531388
1380	0.000466532	0.000528828
1381	0.000490872	0.000525893
1382	0.000518361	0.000522537
1383	0.000549355	0.000518719
1384	0.000584143	0.000514405
1385	0.0006229	0.000509584
1386	0.000665636	0.000504266
1387	0.000712175	0.000498492
1388	0.000762164	0.000492324
1389	0.000815113	0.000485846
1390	0.000870508	0.000479145
1391	0.000927855	0.000472297
1392	0.000986833	0.00046535
1393	0.00104743	0.000458304
1394	0.00110998	0.000451105
1395	0.00117517	0.000443641
1396	0.00124404	0.000435751
1397	0.00131792	0.000427228
1398	0.00139837	0.000417834
1399	0.00148709	0.000407307
1400	0.0015859	0.000395372
1401	0.00169664	0.000381743
1402	0.00182114	0.000366141
1403	0.00196112	0.000348297
1404	0.00211808	0.000327973
1405	0.00229317	0.000304983
1406	0.00248706	0.000279212
1407	0.0026998	0.000250636
1408	0.0029308	0.000219336
1409	0.00317878	0.000185491
1410	0.00344184	0.000149378
1411	0.00371758	0.000111351
1412	0.00400322	7.18232e-05
1413	0.00429567	3.12535e-05
1414	0.00458331	0
1415	0.00484461	0
1416	0.00510269	0
1417	0.00535416	0
1418	0.0055955	0
1419	0.00582312	0
1420	0.00603352	0
1421	0.00622347	0
1422	0.00639027	0
1423	0.00653204	0
1424	0.00664789	0
1425	0.00673808	0
1426	0.00680404	0
1427	0.00684822	0
1428	0.00687381	0
1429	0.00688435	0
1430	0.0068833	0
1431	0.00687356	0
1432	0.00685719	0
1433	0.00683529	0
1434	0.00680805	0
1435	0.00677487	0
1436	0.00673468	0
1437	0.00668632	0
1438	0.0066287	0
1439	0.00656099	0
1440	0.00648256	0
1441	0.00639287	0
1442	0.00629131	0
1443	0.00617705	0
1444	0.00604899	0
1445	0.00590582	0
1446	0.00574621	0
1447	0.00556904	0
1448	0.00537379	0
1449	0.00516073	0
1450	0.00491159	2.32408e-05
1451	0.00463315	6.45288e-05
1452	0.00434257	0.000107487
1453	0.00404462	0.000151393
1454	0.00374449	0.000195458
1455	0.00344745	0.000238894
1456	0.00315839	0.00028098
1457	0.00288145	0.000321115
1458	0.00261984	0.000358847
1459	0.00237575	0.000393884
1460	0.00215038	0.000426079
1461	0.00194411	0.000455408
1462	0.00175673	0.000481927
1463	0.00158761	0.000505742
1464	0.00143594	0.00052698
1465	0.00130081	0.000545768
1466	0.00118129	0.000562229
1467	0.00107643	0.000576485
1468	0.000985244	0.000588665
1469	0.00090662	0.000598917
1470	0.000839328	0.000607414
1471	0.000781998	0.000614356
1472	0.000733158	0.000619965
1473	0.000691294	0.000624475
1474	0.000654962	0.000628114
1475	0.000622816	0.000631093
1476	0.000593639	0.000633602
1477	0.000566553	0.000635778
1478	0.000540946	0.000637709
1479	0.000516463	0.000639441
1480	0.000492969	0.00064098
1481	0.000470492	0.000642304
1482	0.000449175	0.000643373
1483	0.00042922	0.000644136
1484	0.000410845	0.00064454
1485	0.000394258	0.000644537
1486	0.000379639	0.000644087
1487	0.000367127	0.000643157
1488	0.000356818	0.000641725
1489	0.000348763	0.000639778
1490	0.00034296	0.000637313
1491	0.000339347	0.000634339
1492	0.000337791	0.000630874
1493	0.000338076	0.000626951
1494	0.000339893	0.000622617
1495	0.000342836	0.000617933
1496	0.000346405	0.000612978
1497	0.000350033	0.000607838
1498	0.000353115	0.000602608
1499	0.00035506	0.000597382
1500	0.000355351	0.000592242
1501	0.000353602	0.000587253
1502	0.000349605	0.000582451
1503	0.000343366	0.000577842
1504	0.000335102	0.0005734
1505	0.000325211	0.000569071
1506	0.000314225	0.000564781
1507	0.000302733	0.00056045
1508	0.000291303	0.000556
1509	0.000280416	0.000551368
1510	0.000270409	0.000546515
1511	0.000261451	0.000541428
1512	0.000253543	0.000536116
1513	0.000246546	0.000530614
1514	0.000240224	0.000524967
1515	0.000234299	0.000519228
1516	0.000228501	0.000513446
1517	0.000222618	0.000507662
1518	0.000216533	0.0005019
1519	0.000210235	0.000496171
1520	0.000203804	0.000490472
1521	0.000197391	0.000484793
1522	0.000191175	0.000479118
1523	0.000185329	0.000473437
1524	0.000179979	0.000467749
1525	0.00017518	0.000462064
1526	0.000170907	0.000456404
1527	0.000167062	0.000450803
1528	0.0001635	0.000445298
1529	0.000160057	0.000439928
1530	0.000156589	0.000434723
1531	0.000152997	0.000429704
1532	0.000149244	0.00042488
1533	0.000145357	0.000420246
1534	0.000141416	0.000415785
1535	0.000137535	0.000411477
1536	0.000133843	0.000407297
1537	0.000130459	0.000403223
1538	0.000127484	0.000399234
1539	0.000124998	0.000395318
1540	0.000123056	0.000391463
1541	0.000121702	0.000387666
1542	0.000120965	0.000383922
1543	0.00012087	0.000380233
1544	0.000121427	0.000376601
1545	0.000122626	0.000373037
1546	0.000124421	0.000369555
1547	0.000126724	0.000366179
1548	0.000129393	0.000362941
1549	0.000132238	0.000359883
1550	0.000135035	0.000357051
1551	0.000137551	0.00035449
1552	0.000139569	0.000352245
1553	0.000140923	0.000350349
1554	0.000141519	0.000348823
1555	0.000141349	0.000347671
1556	0.000140489	0.000346884
1557	0.000139083	0.00034644
1558	0.000137319	0.000346309
1559	0.000135405	0.000346463
1560	0.00013354	0.000346864
1561	0.000131882	0.000347485
1562	0.00013055	0.000348309
1563	0.000129617	0.000349323
1564	0.000129121	0.000350521
1565	0.000129075	0.000351903
1566	0.000129475	0.00035347
1567	0.000130315	0.000355225
1568	0.000131591	0.000357171
1569	0.000133302	0.000359308
1570	0.000135458	0.000361638
1571	0.000138071	0.00036416
1572	0.000141156	0.000366874
1573	0.000144728	0.000369781
1574	0.000148793	0.000372881
1575	0.000153352	0.000376176
1576	0.000158391	0.00037967
1577	0.000163885	0.00038337
1578	0.000169795	0.000387284
1579	0.000176068	0.000391422
1580	0.000182637	0.000395796
1581	0.000189426	0.000400417
1582	0.000196352	0.000405301
1583	0.000203325	0.000410458
1584	0.000210257	0.000415903
1585	0.000217061	0.000421644
1586	0.000223663	0.000427689
1587	0.000230002	0.000434044
1588	0.000236037	0.000440706
1589	0.000241754	0.000447672
1590	0.000247167	0.000454931
1591	0.000252316	0.00046247
1592	0.000257264	0.000470269
1593	0.000262083	0.000478311
1594	0.000266846	0.000486577
1595	0.000271608	0.000495054
1596	0.000276392	0.000503733
1597	0.000281186	0.000512613
1598	0.000285938	0.0005217
1599	0.000290574	0.000531004
1600	0.000295008	0.000540538
1601	0.000299167	0.000550314
1602	0.000303027	0.00056033
1603	0.000306619	0.000570575
1604	0.00031003	0.000581032
1605	0.000313397	0.000591668
1606	0.000316889	0.000602448
1607	0.000320682	0.000613332
1608	0.000324933	0.000624282
1609	0.000329762	0.000635261
1610	0.000335244	0.000646242
1611	0.000341406	0.000657202
1612	0.000348234	0.000668122
1613	0.000355694	0.000678986
1614	0.000363737	0.00068978
1615	0.000372317	0.000700484
1616	0.000381396	0.000711081
1617	0.000390944	0.000721547
1618	0.000400935	0.000731857
1619	0.000411338	0.000741986
1620	0.000422109	0.00075191
1621	0.000433183	0.000761606
1622	0.000444473	0.000771057
1623	0.000455866	0.000780245
1624	0.000467237	0.000789161
1625	0.000478454	0.000797793
1626	0.000489392	0.000806132
1627	0.000499955	0.000814167
1628	0.00051008	0.000821886
1629	0.000519754	0.000829269
1630	0.000529016	0.000836294
1631	0.000537952	0.000842934
1632	0.000546689	0.000849158
1633	0.000555375	0.000854934
1634	0.000564162	0.00086023
1635	0.000573183	0.000865019
1636	0.00058253	0.000869281
1637	0.00059224	0.000873003
1638	0.000602288	0.000876181
1639	0.000612589	0.000878822
1640	0.000623017	0.000880938
1641	0.000633427	0.000882545
1642	0.000643691	0.000883659
1643	0.000653727	0.00088428
1644	0.000663553	0.000884416
1645	0.000673302	0.000884055
1646	0.00068323	0.000883165
1647	0.00069372	0.000881705
1648	0.000705257	0.000879616
1649	0.000718399	0.000876836
1650	0.000733729	0.000873301
1651	0.000751813	0.000868949
1652	0.000773152	0.000863734
1653	0.00079814	0.000857622
1654	0.000827045	0.000850603
1655	0.00085999	0.000842685
1656	0.000896965	0.000833896
1657	0.000937842	0.000824282
1658	0.000982407	0.000813899
1659	0.0010304	0.000802807
1660	0.00108157	0.000791066
1661	0.0011357	0.000778723
1662	0.00119264	0.000765815
1663	0.00125234	0.000752357
1664	0.0013149	0.000738345
1665	0.0013805	0.000723753
1666	0.00144945	0.000708539
1667	0.00152215	0.000692642
1668	0.00159906	0.000675994
1669	0.00168068	0.000658521
1670	0.00176751	0.000640152
1671	0.00186003	0.000620819
1672	0.00195868	0.000600465
1673	0.00206383	0.000579046
1674	0.00217581	0.000556533
1675	0.00229485	0.000532908
1676	0.00242115	0.000508168
1677	0.00255482	0.000482324
1678	0.00269594	0.000455399
1679	0.00284448	0.000427432
1680	0.00300027	0.000398483
1681	0.00316302	0.000368636
1682	0.00333215	0.000338013
1683	0.0035068	0.000306779
1684	0.00368577	0.00027515
1685	0.00386747	0.000243397
1686	0.00404984	0.000211847
1687	0.00423064	0.000180854
1688	0.00440748	0.000150781
1689	0.00457803	0.000121979
1690	0.00474015	9.47562e-05
1691	0.00489211	6.93551e-05
1692	0.00503264	4.59379e-05
1693	0.00516105	2.45811e-05
1694	0.00527714	5.28397e-06
1695	0.00537097	0
1696	0.00545028	0
1697	0.00551997	0
1698	0.00558044	0
1699	0.00563191	0
1700	0.00567444	0
1701	0.00570785	0
1702	0.00573183	0
1703	0.00574599	0
1704	0.00574998	0
1705	0.00574354	0
1706	0.00572665	0
1707	0.00569954	0
1708	0.00566276	0
1709	0.00561718	0
1710	0.00556394	0
1711	0.00550437	0
1712	0.00543994	0
1713	0.00537209	0
1714	0.00530214	0
1715	0.00523115	0
1716	0.00515858	1.51531e-06
1717	0.0050795	1.08165e-05
1718	0.00500075	1.97094e-05
1719	0.00492188	2.83073e-05
1720	0.00484214	3.67857e-05
1721	0.00476063	4.53557e-05
1722	0.00467651	5.42343e-05
1723	0.0045891	6.36156e-05
1724	0.00449802	7.36479e-05
1725	0.00440327	8.44181e-05
1726	0.00430518	9.59469e-05
1727	0.00420439	0.000108203
1728	0.00410185	0.000121087
1729	0.00399855	0.000134473
1730	0.00389544	0.00014823
1731	0.00379332	0.000162236
1732	0.00369275	0.000176392
1733	0.00359404	0.000190631
1734	0.00349723	0.000204915
1735	0.00340216	0.000219235
1736	0.00330851	0.000233594
1737	0.00321596	0.000247999
1738	0.00312421	0.000262447
1739	0.00303308	0.000276914
1740	0.00294256	0.000291355
1741	0.00285278	0.000305702
1742	0.00276397	0.000319873
1743	0.00267645	0.00033378
1744	0.00259052	0.000347342
1745	0.00250646	0.000360492
1746	0.00242449	0.000373177
1747	0.00234478	0.000385363
1748	0.00226752	0.000397023
1749	0.00219287	0.000408137
1750	0.00212106	0.000418683
1751	0.00205237	0.000428639
1752	0.00198707	0.000437982
1753	0.00192543	0.000446694
1754	0.00186763	0.000454771
1755	0.00181375	0.000462221
1756	0.00176374	0.000469069
1757	0.00171745	0.000475355
1758	0.00167466	0.000481121
1759	0.00163515	0.000486411
1760	0.00159872	0.000491258
1761	0.00156521	0.000495684
1762	0.00153455	0.0004997
1763	0.00150665	0.000503312
1764	0.00148142	0.000506526
1765	0.00145871	0.000509363
1766	0.00143822	0.000511856
1767	0.00141952	0.000514063
1768	0.00140208	0.00051606
1769	0.00138521	0.000517938
1770	0.00136818	0.000519799
1771	0.00135028	0.000521741
1772	0.00133087	0.000523847
1773	0.00130946	0.000526182
1774	0.00128571	0.000528784
1775	0.0012595	0.000531662
1776	0.0012309	0.000534795
1777	0.00120023	0.000538129
1778	0.00116795	0.000541588
1779	0.00113467	0.000545077
1780	0.00110108	0.000548494
1781	0.00106784	0.000551739
1782	0.00103554	0.000554726
1783	0.00100464	0.000557397
1784	0.000975387	0.00055972
1785	0.000947829	0.000561695
1786	0.000921846	0.000563352
1787	0.000897188	0.000564735
1788	0.000873553	0.000565898
1789	0.00085066	0.000566887
1790	0.000828308	0.000567735
1791	0.000806413	0.000568457
1792	0.000785018	0.000569046
1793	0.000764263	0.000569479
1794	0.000744351	0.000569727
1795	0.000725497	0.000569759
1796	0.000707881	0.000569554
1797	0.000691627	0.000569103
1798	0.000676785	0.000568409
1799	0.000663339	0.000567492
1800	0.000651224	0.000566381
1801	0.000640349	0.00056511
1802	0.000630608	0.000563715
1803	0.000621898	0.000562235
1804	0.000614114	0.000560705
1805	0.000607145	0.000559158
1806	0.000600864	0.000557628
1807	0.00059512	0.000556148
1808	0.000589728	0.000554752
1809	0.000584475	0.000553477
1810	0.000579126	0.000552357
1811	0.000573432	0.000551429
1812	0.000567162	0.000550726
1813	0.000560132	0.000550271
1814	0.000552212	0.000550084
1815	0.000543346	0.000550176
1816	0.000533555	0.000550547
1817	0.000522938	0.00055119
1818	0.000511667	0.000552089
1819	0.000499964	0.000553217
1820	0.00048809	0.000554542
1821	0.000476318	0.000556029
1822	0.000464913	0.000557634
1823	0.000454118	0.000559313
1824	0.000444135	0.000561022
1825	0.000435121	0.000562712
1826	0.000427187	0.000564338
1827	0.000420396	0.000565853
1828	0.000414769	0.000567214
1829	0.000410295	0.000568376
1830	0.000406939	0.000569298
1831	0.000404645	0.00056994
1832	0.000403346	0.000570267
1833	0.000402964	0.000570246
1834	0.000403415	0.00056985
1835	0.000404608	0.000569057
1836	0.000406443	0.000567852
1837	0.00040881	0.000566227
1838	0.000411591	0.000564182
1839	0.000414657	0.000561725
1840	0.000417876	0.000558871
1841	0.000421115	0.000555642
1842	0.000424247	0.000552064
1843	0.000427161	0.000548166
1844	0.000429766	0.000543981
1845	0.000432	0.000539539
1846	0.000433828	0.000534871
1847	0.000435242	0.000530006
1848	0.000436256	0.000524968
1849	0.000436893	0.000519784
1850	0.000437178	0.000514478
1851	0.000437119	0.000509074
1852	0.000436698	0.000503601
1853	0.000435863	0.00049809
1854	0.000434526	0.000492577
1855	0.000432584	0.000487103
1856	0.000429915	0.000481708
1857	0.000426407	0.000476435
1858	0.000421977	0.000471319
1859	0.000416588	0.000466391
1860	0.000410267	0.000461675
1861	0.000403104	0.000457181
1862	0.000395249	0.000452911
1863	0.000386892	0.000448858
1864	0.000378239	0.000445008
1865	0.000369481	0.000441346
1866	0.000360768	0.000437858
1867	0.000352191	0.000434532
1868	0.000343772	0.000431364
1869	0.000335472	0.000428356
1870	0.000327208	0.000425511
1871	0.000318876	0.000422836
1872	0.000310385	0.000420332
1873	0.000301675	0.000418
1874	0.00029274	0.000415828
1875	0.00028363	0.0004138
1876	0.000274445	0.000411892
1877	0.000265317	0.000410077
1878	0.000256388	0.000408326
1879	0.000247787	0.000406611
1880	0.000239607	0.000404911
1881	0.000231892	0.000403214
1882	0.000224635	0.000401512
1883	0.00021778	0.000399808
1884	0.000211236	0.000398111
1885	0.000204891	0.000396432
1886	0.000198634	0.000394786
1887	0.000192366	0.000393186
1888	0.000186018	0.000391643
1889	0.00017955	0.000390162
1890	0.000172962	0.000388745
1891	0.000166282	0.000387387
1892	0.000159562	0.000386081
1893	0.000152873	0.000384812
1894	0.000146289	0.000383565
1895	0.000139888	0.000382323
1896	0.000133739	0.000381065
1897	0.000127895	0.000379772
1898	0.000122399	0.000378425
1899	0.000117282	0.000377005
1900	0.000112564	0.000375495
1901	0.000108257	0.000373879
1902	0.00010437	0.000372141
1903	0.000100907	0.000370268
1904	9.78717e-05	0.000368246
1905	9.52669e-05	0.000366067
1906	9.30953e-05	0.000363721
1907	9.13583e-05	0.000361202
1908	9.00549e-05	0.000358505
1909	8.91799e-05	0.00035563
1910	8.87228e-05	0.000352577
1911	8.86656e-05	0.000349353
1912	8.8982e-05	0.000345964
1913	8.96357e-05	0.00034242
1914	9.05806e-05	0.000338735
1915	9.17606e-05	0.000334922
1916	9.311e-05	0.000330999
1917	9.45551e-05	0.000326982
1918	9.60166e-05	0.000322889
1919	9.74124e-05	0.000318737
1920	9.86611e-05	0.000314544
1921	9.96868e-05	0.000310324
1922	0.000100423	0.000306093
1923	0.000100818	0.000301864
1924	0.000100838	0.000297648
1925	0.000100471	0.000293456
1926	9.9724e-05	0.000289296
1927	9.86299e-05	0.000285178
1928	9.72386e-05	0.000281107
1929	9.56162e-05	0.000277091
1930	9.38392e-05	0.000273136
1931	9.1989e-05	0.000269247
1932	9.01458e-05	0.000265431
1933	8.8384e-05	0.000261692
1934	8.67674e-05	0.000258037
1935	8.53464e-05	0.000254472
1936	8.41562e-05	0.000251002
1937	8.32166e-05	0.000247633
1938	8.25339e-05	0.000244373
1939	8.20901e-05	0.000241226
1940	8.1858e-05	0.000238199
1941	8.1799e-05	0.000235297
1942	8.18648e-05	0.000232526
1943	8.20014e-05	0.000229893
1944	8.21525e-05	0.000227402
1945	8.22632e-05	0.000225058
1946	8.22849e-05	0.000222863
1947	8.21786e-05	0.000220818
1948	8.19182e-05	0.00021892
1949	8.14914e-05	0.000217167
1950	8.09004e-05	0.00021555
1951	8.0159e-05	0.000214062
1952	7.92894e-05	0.000212692
1953	7.83176e-05	0.00021143
1954	7.72681e-05	0.000210265
1955	7.61596e-05	0.000209186
1956	7.50019e-05	0.000208184
1957	7.37944e-05	0.000207253
1958	7.25271e-05	0.000206385
1959	7.1183e-05	0.000205576
1960	6.97421e-05	0.000204821
1961	6.81861e-05	0.000204117
1962	6.65031e-05	0.000203459
1963	6.46904e-05	0.000202841
1964	6.27568e-05	0.000202258
1965	6.07225e-05	0.000201702
1966	5.86175e-05	0.000201164
1967	5.64788e-05	0.000200637
1968	5.43464e-05	0.000200112
1969	5.22596e-05	0.000199582
1970	5.02536e-05	0.000199038
1971	4.83572e-05	0.000198476
1972	4.65907e-05	0.00019789
1973	4.49663e-05	0.000197279
1974	4.34884e-05	0.000196639
1975	4.21552e-05	0.00019597
1976	4.09601e-05	0.000195272
1977	3.98942e-05	0.000194544
1978	3.89477e-05	0.000193786
1979	3.81118e-05	0.000192998
1980	3.73815e-05	0.000192178
1981	3.67507e-05	0.000191327
1982	3.62188e-05	0.000190442
1983	3.57889e-05	0.000189522
1984	3.54674e-05	0.000188563
1985	3.52635e-05	0.000187562
1986	3.5189e-05	0.000186516
1987	3.52572e-05	0.000185421
1988	3.54817e-05	0.000184275
1989	3.58753e-05	0.000183075
1990	3.64481e-05	0.000181817
1991	3.72061e-05	0.000180503
1992	3.81496e-05	0.000179131
1993	3.9271e-05	0.000177703
1994	4.05541e-05	0.000176225
1995	4.19732e-05	0.000174701
1996	4.34927e-05	0.00017314
1997	4.5068e-05	0.000171552
[truncated: 2,003 more rows]
[truncated: 69 more columns]

## Sheet: 3 Sources
Reconstructed Source Distributions						Compare Input & Reconstructed Sink Samples					Sink Sample Weights
Age (Ma)	Source 1	Source 2	Source 3				Mean		St. Dev.			Princeton, Bluestone, Hinton	Surprise Canyon3- 06GC149, Surprise_Cyn2, SurpriseC_Cngl	24PL09, 10JM94, 40JM94, 05PL15, 09LB04	Mauch_Chunk	KY-21-SG	Tonka	Stanley, Hot_spring	BC05	09-CM-699	MS11, MS10	MS01, MSGE313	BC01, BC02, CC01	ML01, MP-DZ1	1QZ19	SY-D, Watahomigi, Manakacha1	Tumbling Run, Pottsville Fm, OH-1-SS	Pocohontas, Lee, VA-1-GN	Racoon, Montevallo, Sewanee	KY-18-CB	OH-4-SN	BCRA-01-10	MB1-3, MB2-4, MB2-2, MB2-3, MB2-5, MB2-1, MB1-2, MB1-1	a16, a23, a29, a38, a48, a49, a50	46-1, 46-2	IB_AD, IB_M1, IB_M2	FCB_AD	FCB_A2	FCB_A1	S3	GS01, GS09	MS04, MS05, MS06	MC05, MC17	GS11, GS24	MC20	EC01, RC01, RC19	V01, V10, V18, V20	V22, 25	DMR01, LC01, SP01, CF02
0	0	4.25823e-08	5.73882e-08			Cross-correlation	0.705932	±	0.203314		Weights Source 1	0.0144221	0.142351	0.210533	0.0400291	0.0820524	0.187435	0.0284771	0.523464	0.053676	0.377846	0.621964	0.779834	0.0413012	0.239114	0.236668	0.00561374	0.0411782	0.0285549	0.0636563	0.00793127	0.0113159	0.0574054	0.0814507	0.0602166	0.047192	0.0829315	0.092798	0.0158894	0.0568682	0.487514	0.00202624	0.428237	1	0.348295	0.639858	0.889496	1	0.96945
1	0	4.26577e-08	5.74909e-08			Likeness	0.731014	±	0.130336		Weights Source 2	0.000558285	0.00154126	0	0.0099871	0.00192388	0	0.03913	0.0024659	0.0232191	0	0	0.0314132	0.00974305	0.000229205	0	0.00955406	0	0.00397413	0	0.000634747	0.00838928	8.20945e-05	1.66695e-05	0	0.00264046	0.00828455	0.00249563	0	0.0188894	0	0	0.00337576	0	0.00651908	0.00538402	0	0	0.03055
2	0	4.28086e-08	5.76964e-08			Kuiper V Value	0.217004	±	0.137087		Weights Source 3	0.98502	0.856108	0.789467	0.949984	0.916024	0.812565	0.932393	0.474071	0.923105	0.622154	0.378036	0.188752	0.948956	0.760657	0.763332	0.984832	0.958822	0.967471	0.936344	0.991434	0.980295	0.942513	0.918533	0.939783	0.950168	0.908784	0.904706	0.984111	0.924242	0.512486	0.997974	0.568388	0	0.645186	0.354758	0.110504	0	0
3	0	4.30349e-08	5.80047e-08			KS D Value	0.186371	±	0.135432
4	0	4.33369e-08	5.8416e-08								Cross-correlation	0.828381	0.927342	0.0161765	0.804431	0.928178	0.0132833	0.778297	0.446268	0.784208	0.747793	0.577394	0.750891	0.826562	0.509911	0.666908	0.668966	0.745875	0.83982	0.904592	0.824673	0.856388	0.854567	0.862886	0.848962	0.912888	0.864388	0.943452	0.765198	0.857471	0.822703	0.391436	0.776016	0.897857	0.714154	0.592352	0.457963	0.45725	0.778914
5	0	4.37146e-08	5.89305e-08			Number of sink samples	108				Likeness	0.710293	0.852082	0.242314	0.714771	0.838128	0.239733	0.75545	0.570168	0.754438	0.674688	0.624225	0.722512	0.802255	0.714626	0.767301	0.722074	0.646061	0.778999	0.805124	0.706772	0.754728	0.78742	0.84162	0.781737	0.851281	0.779217	0.866925	0.680031	0.809987	0.786095	0.27354	0.770073	0.745664	0.776706	0.708343	0.583272	0.514383	0.683035
6	0	4.41682e-08	5.95485e-08			Mean Cross-correlation of sink samples	0.372				Kuiper V Value	0.27324	0.108249	0.755287	0.266545	0.102101	0.757111	0.169434	0.266328	0.209464	0.300729	0.167024	0.182523	0.157059	0.250035	0.207599	0.211722	0.35202	0.180013	0.123283	0.241539	0.153444	0.156698	0.140002	0.194597	0.0793623	0.190597	0.0984509	0.192727	0.161176	0.174936	0.664956	0.169053	0.156244	0.175163	0.229152	0.360704	0.440825	0.261785
7	0	4.46979e-08	6.02702e-08			Range Cross-correlation of sink samples	0.963				KS D Value	0.178584	0.0650879	0.753731	0.240498	0.053852	0.744643	0.154304	0.210746	0.209316	0.175216	0.0918186	0.131369	0.155075	0.248176	0.20535	0.19979	0.231456	0.116027	0.069042	0.223826	0.148661	0.128025	0.0909025	0.113666	0.061265	0.183549	0.0773262	0.149866	0.122854	0.145219	0.421031	0.132847	0.15119	0.12341	0.193486	0.349354	0.402491	0.259244
8	0	4.53038e-08	6.1096e-08			Mean Kuiper V value of sink samples	0.408
9	0	4.59863e-08	6.20262e-08			Range Kuiper V value of sink samples	0.961
10	0	4.67457e-08	6.30613e-08			Final Residual	0.256271
11	0	4.75821e-08	6.42018e-08			Number of Iterations	120
12	0	4.8496e-08	6.54481e-08
13	0	4.94877e-08	6.68008e-08
14	0	5.05576e-08	6.82606e-08
15	0	5.17061e-08	6.9828e-08
16	0	5.29335e-08	7.15037e-08
17	0	5.42404e-08	7.32884e-08
18	0	5.56273e-08	7.51829e-08
19	0	5.70945e-08	7.71879e-08
20	0	5.86426e-08	7.93042e-08
21	0	6.02721e-08	8.15327e-08
22	0	6.19835e-08	8.38741e-08
23	0	6.37773e-08	8.63295e-08
24	0	6.56542e-08	8.88996e-08
25	0	6.76145e-08	9.15854e-08
26	0	6.9659e-08	9.43879e-08
27	0	7.1788e-08	9.73079e-08
28	0	7.40023e-08	1.00346e-07
29	0	7.63022e-08	1.03504e-07
30	0	7.86885e-08	1.06783e-07
31	0	8.11616e-08	1.10183e-07
32	0	8.3722e-08	1.13705e-07
33	0	8.63703e-08	1.17351e-07
34	0	8.9107e-08	1.21121e-07
35	0	9.19325e-08	1.25016e-07
36	0	9.48474e-08	1.29038e-07
37	0	9.7852e-08	1.33187e-07
38	0	1.00947e-07	1.37464e-07
39	0	1.04132e-07	1.4187e-07
40	0	1.07409e-07	1.46406e-07
41	0	1.10777e-07	1.51073e-07
42	0	1.14236e-07	1.55872e-07
43	0	1.1779e-07	1.60806e-07
44	0	1.21436e-07	1.65874e-07
45	0	1.25174e-07	1.71076e-07
46	0	1.29005e-07	1.76413e-07
47	0	1.32929e-07	1.81885e-07
48	0	1.36945e-07	1.87494e-07
49	0	1.41054e-07	1.93239e-07
50	0	1.45256e-07	1.99122e-07
51	0	1.49551e-07	2.05143e-07
52	0	1.53939e-07	2.11303e-07
53	0	1.58419e-07	2.17602e-07
54	0	1.62992e-07	2.2404e-07
55	0	1.67657e-07	2.30618e-07
56	0	1.72413e-07	2.37337e-07
57	0	1.77261e-07	2.44196e-07
58	0	1.822e-07	2.51196e-07
59	0	1.87229e-07	2.58337e-07
60	0	1.92349e-07	2.65619e-07
61	0	1.97558e-07	2.73043e-07
62	0	2.02855e-07	2.80608e-07
63	0	2.08241e-07	2.88315e-07
64	0	2.13714e-07	2.96163e-07
65	0	2.19273e-07	3.04154e-07
66	0	2.24919e-07	3.12286e-07
67	0	2.30649e-07	3.20561e-07
68	0	2.36463e-07	3.28977e-07
69	0	2.4236e-07	3.37535e-07
70	0	2.48339e-07	3.46235e-07
71	0	2.54398e-07	3.55077e-07
72	0	2.60538e-07	3.64061e-07
73	0	2.66756e-07	3.73187e-07
74	0	2.73052e-07	3.82455e-07
75	0	2.79424e-07	3.91866e-07
76	0	2.85871e-07	4.01419e-07
77	0	2.92392e-07	4.11115e-07
78	0	2.98987e-07	4.20955e-07
79	0	3.05653e-07	4.30938e-07
80	0	3.12389e-07	4.41065e-07
81	0	3.19195e-07	4.51337e-07
82	3.43927e-10	3.26011e-07	4.61699e-07
83	1.03325e-09	3.32836e-07	4.7215e-07
84	1.77743e-09	3.39718e-07	4.82741e-07
85	2.58096e-09	3.46657e-07	4.93474e-07
86	3.44675e-09	3.5365e-07	5.04348e-07
87	4.37835e-09	3.60695e-07	5.15366e-07
88	5.37981e-09	3.67791e-07	5.26527e-07
89	6.45546e-09	3.74937e-07	5.37834e-07
90	7.60988e-09	3.82132e-07	5.49288e-07
91	8.84794e-09	3.89374e-07	5.60893e-07
92	1.01748e-08	3.96663e-07	5.72651e-07
93	1.1596e-08	4.03997e-07	5.84564e-07
94	1.31174e-08	4.11375e-07	5.96637e-07
95	1.47451e-08	4.18797e-07	6.08873e-07
96	1.64857e-08	4.26263e-07	6.21277e-07
97	1.83461e-08	4.33771e-07	6.33852e-07
98	2.03338e-08	4.41322e-07	6.46605e-07
99	2.24564e-08	4.48916e-07	6.59541e-07
100	2.47221e-08	4.56552e-07	6.72667e-07
101	2.71397e-08	4.64231e-07	6.85988e-07
102	2.97182e-08	4.71954e-07	6.99513e-07
103	3.24672e-08	4.79721e-07	7.13249e-07
104	3.53969e-08	4.87534e-07	7.27206e-07
105	3.85177e-08	4.95393e-07	7.41391e-07
106	4.18409e-08	5.03301e-07	7.55816e-07
107	4.53779e-08	5.11258e-07	7.70491e-07
108	4.91409e-08	5.19268e-07	7.85428e-07
109	5.31424e-08	5.27332e-07	8.00637e-07
110	5.73957e-08	5.35453e-07	8.16133e-07
111	6.19142e-08	5.43635e-07	8.31929e-07
112	6.67122e-08	5.51881e-07	8.48038e-07
113	7.18041e-08	5.60194e-07	8.64476e-07
114	7.7205e-08	5.68579e-07	8.81259e-07
115	8.29303e-08	5.7704e-07	8.98403e-07
116	8.89959e-08	5.85581e-07	9.15926e-07
117	9.5418e-08	5.94209e-07	9.33844e-07
118	1.02213e-07	6.02927e-07	9.52177e-07
119	1.09398e-07	6.11744e-07	9.70944e-07
120	1.1699e-07	6.20663e-07	9.90165e-07
121	1.25005e-07	6.29693e-07	1.00986e-06
122	1.33462e-07	6.38839e-07	1.03005e-06
123	1.42378e-07	6.4811e-07	1.05076e-06
124	1.51769e-07	6.57513e-07	1.072e-06
125	1.61654e-07	6.67056e-07	1.09381e-06
126	1.72048e-07	6.76748e-07	1.1162e-06
127	1.82978e-07	6.86598e-07	1.1392e-06
128	1.94456e-07	6.96617e-07	1.16284e-06
129	2.06493e-07	7.0681e-07	1.18713e-06
130	2.19106e-07	7.1719e-07	1.2121e-06
131	2.32307e-07	7.27764e-07	1.23777e-06
132	2.46112e-07	7.38544e-07	1.26416e-06
133	2.60533e-07	7.49539e-07	1.2913e-06
134	2.75582e-07	7.60761e-07	1.3192e-06
135	2.9127e-07	7.7222e-07	1.3479e-06
136	3.07606e-07	7.83928e-07	1.37741e-06
137	3.24598e-07	7.95895e-07	1.40775e-06
138	3.42253e-07	8.08134e-07	1.43895e-06
139	3.60577e-07	8.20655e-07	1.47102e-06
140	3.79572e-07	8.33472e-07	1.50398e-06
141	3.99241e-07	8.46596e-07	1.53786e-06
142	4.19585e-07	8.60038e-07	1.57267e-06
143	4.406e-07	8.73813e-07	1.60842e-06
144	4.62283e-07	8.87931e-07	1.64514e-06
145	4.8463e-07	9.02407e-07	1.68283e-06
146	5.07632e-07	9.17252e-07	1.72152e-06
147	5.31279e-07	9.3248e-07	1.76121e-06
148	5.5556e-07	9.48105e-07	1.80192e-06
149	5.80461e-07	9.64139e-07	1.84365e-06
150	6.05966e-07	9.80597e-07	1.88643e-06
151	6.32058e-07	9.97492e-07	1.93025e-06
152	6.58717e-07	1.01484e-06	1.97514e-06
153	6.8592e-07	1.03265e-06	2.02108e-06
154	7.13646e-07	1.05095e-06	2.06811e-06
155	7.41869e-07	1.06974e-06	2.11621e-06
156	7.70562e-07	1.08904e-06	2.16541e-06
157	7.99697e-07	1.10887e-06	2.2157e-06
158	8.29245e-07	1.12925e-06	2.26709e-06
159	8.59175e-07	1.15019e-06	2.3196e-06
160	8.89456e-07	1.17172e-06	2.37323e-06
161	9.20056e-07	1.19384e-06	2.42799e-06
162	9.50942e-07	1.21658e-06	2.48389e-06
163	9.82081e-07	1.23996e-06	2.54094e-06
164	1.01344e-06	1.26401e-06	2.59916e-06
165	1.04499e-06	1.28874e-06	2.65855e-06
166	1.07669e-06	1.31418e-06	2.71915e-06
167	1.10851e-06	1.34035e-06	2.78095e-06
168	1.14042e-06	1.36727e-06	2.844e-06
169	1.17239e-06	1.395e-06	2.90833e-06
170	1.2044e-06	1.42355e-06	2.97397e-06
171	1.23641e-06	1.45295e-06	3.04093e-06
172	1.2684e-06	1.48323e-06	3.10925e-06
173	1.30035e-06	1.51442e-06	3.17897e-06
174	1.33223e-06	1.54656e-06	3.25015e-06
175	1.36404e-06	1.57969e-06	3.32282e-06
176	1.39576e-06	1.61385e-06	3.39705e-06
177	1.42739e-06	1.64907e-06	3.47288e-06
178	1.45894e-06	1.68539e-06	3.5504e-06
179	1.49045e-06	1.72286e-06	3.62966e-06
180	1.52197e-06	1.76151e-06	3.71073e-06
181	1.55363e-06	1.80137e-06	3.79368e-06
182	1.58564e-06	1.84246e-06	3.87858e-06
183	1.61836e-06	1.88477e-06	3.96547e-06
184	1.65238e-06	1.92825e-06	4.05438e-06
185	1.68862e-06	1.97281e-06	4.14529e-06
186	1.72852e-06	2.01824e-06	4.23812e-06
187	1.77423e-06	2.06425e-06	4.33268e-06
188	1.82886e-06	2.11033e-06	4.42867e-06
189	1.89682e-06	2.15578e-06	4.52561e-06
190	1.98409e-06	2.1996e-06	4.62277e-06
191	2.09857e-06	2.24045e-06	4.71919e-06
192	2.25026e-06	2.27663e-06	4.81359e-06
193	2.45132e-06	2.30604e-06	4.90439e-06
194	2.71585e-06	2.32624e-06	4.98976e-06
195	3.0593e-06	2.33456e-06	5.06765e-06
196	3.49749e-06	2.3283e-06	5.13602e-06
197	4.04507e-06	2.30495e-06	5.19297e-06
198	4.71363e-06	2.26259e-06	5.23712e-06
199	5.50948e-06	2.2003e-06	5.26784e-06
200	6.43135e-06	2.11853e-06	5.28567e-06
201	7.4683e-06	2.01955e-06	5.29258e-06
202	8.59832e-06	1.90765e-06	5.29218e-06
203	9.78784e-06	1.78927e-06	5.28983e-06
204	1.09926e-05	1.67283e-06	5.29248e-06
205	1.21597e-05	1.56835e-06	5.30837e-06
206	1.32315e-05	1.4868e-06	5.34652e-06
207	1.41501e-05	1.43921e-06	5.41599e-06
208	1.48626e-05	1.43578e-06	5.5252e-06
209	1.53266e-05	1.4849e-06	5.68107e-06
210	1.55139e-05	1.59236e-06	5.88847e-06
211	1.54114e-05	1.76146e-06	6.1503e-06
212	1.50281e-05	1.99144e-06	6.46617e-06
213	1.43949e-05	2.27752e-06	6.83237e-06
214	1.35538e-05	2.61301e-06	7.24372e-06
215	1.25576e-05	2.98942e-06	7.69357e-06
216	1.14638e-05	3.39735e-06	8.17459e-06
217	1.03302e-05	3.82749e-06	8.67948e-06
218	9.2094e-06	4.27139e-06	9.20165e-06
219	8.14591e-06	4.7222e-06	9.73582e-06
220	7.17338e-06	5.17497e-06	1.02782e-05
221	6.31392e-06	5.62686e-06	1.08268e-05
222	5.57855e-06	6.07696e-06	1.13811e-05
223	4.96865e-06	6.52609e-06	1.19419e-05
224	4.47798e-06	6.9763e-06	1.25113e-05
225	4.09505e-06	7.43052e-06	1.30918e-05
226	3.80537e-06	7.89202e-06	1.36864e-05
227	3.59345e-06	8.36411e-06	1.4298e-05
228	3.44437e-06	8.84977e-06	1.49292e-05
229	3.34493e-06	9.35142e-06	1.55824e-05
230	3.28442e-06	9.8708e-06	1.62593e-05
231	3.25505e-06	1.04088e-05	1.6961e-05
232	3.25215e-06	1.09656e-05	1.76878e-05
233	3.27431e-06	1.15403e-05	1.84395e-05
234	3.32334e-06	1.21313e-05	1.92152e-05
235	3.4043e-06	1.27361e-05	2.00132e-05
236	3.52539e-06	1.33514e-05	2.08313e-05
237	3.69767e-06	1.39731e-05	2.16665e-05
238	3.93468e-06	1.45965e-05	2.25155e-05
239	4.25166e-06	1.52165e-05	2.33747e-05
240	4.66435e-06	1.58277e-05	2.424e-05
241	5.18743e-06	1.64251e-05	2.5108e-05
242	5.83252e-06	1.7004e-05	2.59751e-05
243	6.60587e-06	1.75609e-05	2.68391e-05
244	7.50605e-06	1.80938e-05	2.76987e-05
245	8.52187e-06	1.86027e-05	2.85544e-05
246	9.63098e-06	1.90897e-05	2.94083e-05
247	1.07994e-05	1.95596e-05	3.02646e-05
248	1.19824e-05	2.00193e-05	3.11291e-05
249	1.31267e-05	2.04776e-05	3.20095e-05
250	1.41743e-05	2.09445e-05	3.2914e-05
251	1.50672e-05	2.14305e-05	3.38515e-05
252	1.57525e-05	2.19456e-05	3.48302e-05
253	1.61851e-05	2.24984e-05	3.58576e-05
254	1.63356e-05	2.30953e-05	3.69393e-05
255	1.61985e-05	2.37388e-05	3.8077e-05
256	1.57839e-05	2.44285e-05	3.92709e-05
257	1.51191e-05	2.51614e-05	4.05187e-05
258	1.42461e-05	2.59318e-05	4.18158e-05
259	1.3217e-05	2.67323e-05	4.31566e-05
260	1.20888e-05	2.75548e-05	4.45346e-05
261	1.09184e-05	2.83912e-05	4.59433e-05
262	9.75752e-06	2.92342e-05	4.73772e-05
263	8.64935e-06	3.00783e-05	4.88317e-05
264	7.6264e-06	3.09196e-05	5.03038e-05
265	6.70962e-06	3.17565e-05	5.17921e-05
266	5.9089e-06	3.25891e-05	5.32967e-05
267	5.22455e-06	3.34192e-05	5.48191e-05
268	4.64933e-06	3.42499e-05	5.63616e-05
269	4.17078e-06	3.50853e-05	5.79275e-05
270	3.77344e-06	3.59299e-05	5.95201e-05
271	3.44076e-06	3.67884e-05	6.11431e-05
272	3.1566e-06	3.76652e-05	6.27998e-05
273	2.90625e-06	3.85648e-05	6.44934e-05
274	2.67705e-06	3.9491e-05	6.62267e-05
275	2.4586e-06	4.04476e-05	6.80023e-05
276	2.24286e-06	4.14375e-05	6.98223e-05
277	2.02394e-06	4.24637e-05	7.16883e-05
278	1.79801e-06	4.35286e-05	7.3602e-05
279	1.56312e-06	4.46342e-05	7.55643e-05
280	1.31916e-06	4.57824e-05	7.75761e-05
281	1.06789e-06	4.69743e-05	7.96378e-05
282	8.13029e-07	4.82108e-05	8.17495e-05
283	5.60474e-07	4.94924e-05	8.39109e-05
284	3.18474e-07	5.08186e-05	8.6121e-05
285	9.7764e-08	5.21885e-05	8.83787e-05
286	0	5.35856e-05	9.06674e-05
287	0	5.50142e-05	9.29913e-05
288	0	5.6491e-05	9.53668e-05
289	0	5.80154e-05	9.77936e-05
290	0	5.95868e-05	0.000100271
291	6.12997e-08	6.11937e-05	0.000102789
292	4.09024e-07	6.27966e-05	0.00010531
293	8.77005e-07	6.44222e-05	0.000107859
294	1.45537e-06	6.60703e-05	0.000110437
295	2.12363e-06	6.77429e-05	0.000113045
296	2.84924e-06	6.94437e-05	0.000115689
297	3.58821e-06	7.11775e-05	0.000118372
298	4.29092e-06	7.29506e-05	0.0001211
299	4.90474e-06	7.47698e-05	0.00012388
300	5.37913e-06	7.66413e-05	0.000126719
301	5.67112e-06	7.85701e-05	0.000129621
302	5.75054e-06	8.05586e-05	0.000132591
303	5.60424e-06	8.26064e-05	0.00013563
304	5.23875e-06	8.47096e-05	0.000138736
305	4.68088e-06	8.68603e-05	0.000141904
306	3.9762e-06	8.90477e-05	0.000145129
307	3.18558e-06	9.12581e-05	0.000148401
308	2.38015e-06	9.3476e-05	0.000151708
309	1.63534e-06	9.56849e-05	0.000155041
310	1.02469e-06	9.7869e-05	0.000158388
311	6.14032e-07	0.000100014	0.000161739
312	4.56665e-07	0.000102107	0.000165085
313	5.89736e-07	0.000104138	0.000168422
314	1.03214e-06	0.000106101	0.000171745
315	1.78386e-06	0.000107994	0.000175054
316	2.82665e-06	0.000109815	0.000178351
317	4.12588e-06	0.000111569	0.00018164
318	5.63332e-06	0.000113259	0.000184929
319	7.29056e-06	0.000114895	0.000188224
320	9.03291e-06	0.000116482	0.000191535
321	1.07934e-05	0.000118032	0.00019487
322	1.25068e-05	0.000119552	0.00019824
323	1.41128e-05	0.000121052	0.000201651
324	1.55592e-05	0.000122539	0.000205112
325	1.68037e-05	0.000124018	0.000208629
326	1.78148e-05	0.000125497	0.000212205
327	1.85716e-05	0.000126979	0.000215844
328	1.9063e-05	0.000128467	0.000219547
329	1.9286e-05	0.000129964	0.000223316
330	1.92436e-05	0.000131471	0.000227149
331	1.89434e-05	0.000132992	0.000231047
332	1.83954e-05	0.000134526	0.000235009
333	1.76116e-05	0.000136078	0.000239037
334	1.66052e-05	0.000137646	0.000243128
335	1.53913e-05	0.000139232	0.000247286
336	1.39863e-05	0.000140836	0.00025151
337	1.24089e-05	0.000142456	0.000255803
338	1.06783e-05	0.000144089	0.000260167
339	8.82146e-06	0.00014573	0.000264603
340	6.86279e-06	0.000147373	0.000269112
341	4.82661e-06	0.00014901	0.000273697
342	2.73536e-06	0.000150632	0.00027836
343	6.07772e-07	0.000152231	0.000283103
344	0	0.000153536	0.000287673
345	0	0.000154695	0.000292223
346	0	0.000155802	0.000296854
347	0	0.00015685	0.000301567
348	0	0.00015783	0.000306358
349	0	0.000158737	0.000311222
350	0	0.000159562	0.000316153
351	0	0.000160301	0.000321144
352	0	0.000160945	0.000326188
353	0	0.000161491	0.000331277
354	0	0.000161931	0.000336405
355	0	0.000162261	0.000341568
356	0	0.000162475	0.000346766
357	0	0.000162568	0.000352
358	0	0.000162533	0.000357276
359	0	0.000162369	0.0003626
360	0	0.00016207	0.000367983
361	0	0.000161638	0.000373439
362	0	0.000161074	0.000378979
363	0	0.000160381	0.000384619
364	0	0.000159569	0.000390373
365	0	0.000158649	0.000396255
366	0	0.000157636	0.000402278
367	0	0.000156548	0.000408455
368	0	0.000155406	0.000414797
369	0	0.000154235	0.000421316
370	0	0.00015306	0.000428022
371	0	0.000151908	0.000434925
372	0	0.00015081	0.000442035
373	0	0.000149792	0.000449363
374	0	0.000148884	0.000456918
375	0	0.000148115	0.000464711
376	0	0.000147513	0.000472749
377	0	0.000147104	0.000481044
378	0	0.000146914	0.000489604
379	0	0.000146969	0.000498437
380	0	0.000147295	0.000507557
381	0	0.000147909	0.000516964
382	0	0.000148829	0.000526663
383	0	0.000150072	0.000536659
384	0	0.000151654	0.000546954
385	0	0.000153585	0.000557547
386	0	0.000155876	0.000568439
387	0	0.000158533	0.000579624
388	0	0.000161562	0.000591098
389	0	0.000164962	0.000602851
390	0	0.000168731	0.000614873
391	0	0.000172861	0.000627149
392	0	0.000177342	0.000639661
393	0	0.000182158	0.00065239
394	0	0.000187289	0.000665311
395	0	0.000192707	0.000678396
396	0	0.000198381	0.000691616
397	0	0.000204276	0.000704934
398	0	0.000210346	0.000718315
399	0	0.000216546	0.000731716
400	0	0.000222822	0.000745094
401	0	0.000229115	0.000758402
402	0	0.000235366	0.00077159
403	0	0.000241509	0.000784609
404	0	0.000247477	0.000797406
405	0	0.000253205	0.000809927
406	0	0.000258623	0.000822119
407	0	0.000263667	0.000833929
408	0	0.000268274	0.000845304
409	0	0.000272384	0.000856195
410	0	0.000275945	0.000866552
411	0	0.000278909	0.000876331
412	0	0.000281239	0.00088549
413	0	0.000282912	0.000893992
414	0	0.000283952	0.000901805
415	0	0.000284513	0.000908898
416	0	0.000285127	0.000915242
417	0	0.000287218	0.000920804
418	0	0.000293901	0.000925532
419	0	0.000310601	0.000929353
420	0	0.000344322	0.000932178
421	0	0.000400223	0.000933947
422	0	0.000475915	0.000934687
423	0	0.000555502	0.000934633
424	0	0.000614227	0.000934125
425	0	0.000629379	0.000933477
426	0	0.000593217	0.000932815
427	0	0.000517646	0.000932016
428	0	0.000426862	0.000930802
429	0	0.000344067	0.000928907
430	0	0.000282055	0.000926202
431	0	0.000242334	0.0009227
432	0	0.000220307	0.000918494
433	0	0.000211345	0.000913676
434	0	0.000214504	0.000908293
435	0	0.000233143	0.00090233
436	0	0.000272443	0.000895753
437	0	0.000334165	0.000888567
438	0	0.000410724	0.000880896
439	0	0.000483148	0.000873007
440	0	0.000526956	0.000865238
441	0	0.000524354	0.000857837
442	0	0.000474634	0.000850834
443	0	0.000394607	0.000844032
444	0	0.000308697	0.000837134
445	0	0.000236547	0.000829906
446	0	0.000186482	0.000822255
447	0	0.000156855	0.000814216
448	0	0.000141407	0.000805883
449	0	0.000133911	0.000797346
450	0	0.000130179	0.000788669
451	0	0.000128031	0.000779886
452	0	0.000126542	0.000771017
453	0	0.000125378	0.000762067
454	0	0.000124436	0.00075304
455	0	0.000123692	0.000743938
456	0	0.000123177	0.00073476
457	0	0.00012305	0.000725503
458	0	0.000123841	0.000716163
459	0	0.00012696	0.000706723
460	0	0.000135498	0.000697149
461	0	0.000154847	0.000687378
462	0	0.00019197	0.000677332
463	0	0.000251989	0.000666956
464	0	0.000332484	0.000656294
465	0	0.0004176	0.000645566
466	0	0.000482473	0.000635105
467	0	0.000504299	0.00062522
468	0	0.000475249	0.000616026
469	0	0.000407207	0.000607383
470	0	0.000324566	0.000598991
471	0	0.00025126	0.000590555
472	0	0.0002019	0.000581898
473	0	0.000181541	0.000572961
474	0	0.000190744	0.000563747
475	0	0.000229385	0.000554262
476	0	0.000295288	0.000544539
477	0	0.000379199	0.000534704
478	0	0.000462001	0.000525005
479	0	0.000519718	0.000515754
480	0	0.000535752	0.000507167
481	0	0.000512309	0.000499222
482	0	0.000471543	0.000491639
483	0	0.000444018	0.000484029
484	0	0.000451407	0.000476119
485	0	0.000494103	0.000467909
486	0	0.000551089	0.000459673
487	0	0.000592243	0.000451801
488	0	0.000596092	0.000444575
489	0	0.000562363	0.000438002
490	0	0.000511897	0.000431822
491	0	0.000474937	0.000425652
492	0	0.000475697	0.000419189
493	0	0.000521162	0.00041235
494	0	0.00059799	0.000405312
495	3.91316e-06	0.00067753	0.000397795
496	1.77143e-05	0.00072906	0.0003892
497	3.44321e-05	0.000737153	0.000380899
498	5.43446e-05	0.000706618	0.000372791
499	7.7398e-05	0.000660609	0.000364596
500	0.000103424	0.000629459	0.000355961
501	0.00013232	0.000640859	0.000346553
502	0.000164073	0.000716999	0.000336099
503	0.000198701	0.000875451	0.000324374
504	0.000236258	0.00112618	0.000311248
505	0.000276972	0.00146197	0.000296779
506	0.000321449	0.0018497	0.000281298
507	0.000370359	0.00223333	0.00026541
508	0.000424007	0.0025636	0.000249694
509	0.000481738	0.00282862	0.00023441
510	0.000541657	0.00306886	0.000219355
511	0.000600994	0.00336273	0.000203981
512	0.000656905	0.00379052	0.00018773
513	0.00070724	0.00439988	0.000170341
514	0.000750835	0.00519359	0.000151966
515	0.000787199	0.00614605	0.000133002
516	0.000815747	0.00724077	0.000113745
517	0.000834999	0.00850829	9.40385e-05
518	0.000842345	0.0100363	7.31779e-05
519	0.000834771	0.0119322	5.02767e-05
520	0.000810302	0.0142508	2.49429e-05
521	0.00076726	0.0169373	0
522	0.000687855	0.0198269	0
523	0.000598492	0.022751	0
524	0.000502035	0.0255968	0
525	0.000398622	0.0283565	0
526	0.000286723	0.0310931	0
527	0.000165344	0.0338644	0
528	3.60059e-05	0.0366537	0
529	0	0.0393035	0
530	0	0.0415902	0
531	0	0.0432284	0
532	0	0.0439641	0
533	0	0.043669	0
534	0	0.0423526	0
535	0	0.0401084	0
536	0	0.0370665	0
537	0	0.0334061	0
538	0	0.0293906	0
539	0	0.0253287	3.54936e-05
540	0	0.0215522	8.48595e-05
541	0	0.0182843	0.000127707
542	0	0.0155876	0.000163239
543	0	0.0133976	0.000192284
544	0	0.011577	0.000216607
545	0	0.00997336	0.000238168
546	0	0.00846906	0.000258476
547	0	0.0070148	0.000278168
548	0	0.00564004	0.00029687
549	0	0.00443146	0.000313474
550	0	0.00348472	0.000326753
551	0	0.00285467	0.000336004
552	0	0.00251915	0.00034151
553	0	0.00238143	0.000344508
554	0	0.00231357	0.000346633
555	0	0.00221612	0.000349158
556	0	0.00205634	0.000352498
557	0	0.00186225	0.000356293
558	0	0.0016828	0.000359915
559	0	0.00154635	0.000363003
560	0	0.00144561	0.000365656
561	0	0.00135281	0.000368233
562	0	0.001247	0.000371013
563	0	0.0011296	0.000373984
564	0	0.00101756	0.000376939
565	0	0.000923786	0.000379718
566	0	0.000844887	0.000382372
567	0	0.000766415	0.000385091
568	0	0.000678027	0.000388008
569	0	0.000582952	0.000391081
570	0	0.000494718	0.000394133
571	0	0.000427171	0.00039698
572	0	0.000387815	0.000399519
573	0	0.000378328	0.000401717
574	0	0.00039851	0.000403567
575	0	0.000447803	0.000405067
576	0	0.000521963	0.00040626
577	0	0.000607918	0.000407306
578	0	0.000683043	0.000408491
579	0	0.000722764	0.000410124
580	0	0.000713115	0.000412385
581	0	0.000658975	0.000415211
582	0	0.000581077	0.00041834
583	0	0.000504077	0.000421459
584	0	0.000444864	0.000424356
585	0	0.000408338	0.00042697
586	0	0.000390643	0.000429352
587	0	0.00038492	0.000431588
588	0	0.000385353	0.000433751
589	0	0.00038841	0.000435878
590	0	0.000392412	0.000437982
591	0	0.000396695	0.000440059
592	0	0.000401039	0.000442099
593	0	0.000405374	0.000444087
594	0	0.000409664	0.000446005
595	0	0.00041388	0.000447838
596	0	0.000417994	0.000449566
597	0	0.000421974	0.000451171
598	0	0.000425785	0.000452636
599	0	0.000429394	0.000453943
600	0	0.000432763	0.000455073
601	0	0.000435854	0.000456012
602	0	0.000438629	0.000456742
603	0	0.000441053	0.000457251
604	0	0.000443089	0.000457523
605	0	0.000444704	0.000457548
606	0	0.00044587	0.000457315
607	0	0.000446559	0.000456815
608	0	0.00044675	0.00045604
609	0	0.000446428	0.000454985
610	0	0.000445581	0.000453646
611	0	0.000444206	0.000452023
612	0	0.000442302	0.000450113
613	0	0.000439877	0.000447921
614	0	0.000436943	0.000445448
615	0	0.00043352	0.000442701
616	0	0.00042963	0.000439687
617	0	0.000425301	0.000436415
618	0	0.000420563	0.000432894
619	0	0.000415453	0.000429136
620	0	0.000410006	0.000425154
621	0	0.00040426	0.000420961
622	0	0.000398255	0.000416571
623	0	0.00039203	0.000412
624	0	0.000385622	0.000407262
625	0	0.000379069	0.000402373
626	0	0.000372404	0.000397348
627	0	0.000365662	0.000392202
628	0	0.000358871	0.000386949
629	0	0.000352057	0.000381603
630	0	0.000345244	0.000376176
631	0	0.00033845	0.000370681
632	0	0.000331692	0.000365127
633	0	0.000324983	0.000359525
634	0	0.00031833	0.000353883
635	0	0.000311738	0.000348208
636	0	0.000305211	0.000342508
637	0	0.000298747	0.000336787
638	0	0.000292344	0.000331049
639	0	0.000285999	0.0003253
640	0	0.000279706	0.000319541
641	0	0.000273459	0.000313777
642	0	0.000267251	0.000308009
643	0	0.000261076	0.000302242
644	0	0.000254927	0.000296478
645	0	0.000248801	0.00029072
646	0	0.000242692	0.000284972
647	0	0.000236599	0.000279239
648	0	0.00023052	0.000273524
649	0	0.000224455	0.000267831
650	0	0.000218408	0.000262168
651	0	0.000212383	0.000256537
652	0	0.000206384	0.000250947
653	0	0.00020042	0.000245401
654	0	0.000194497	0.000239907
655	0	0.000188627	0.000234469
656	0	0.000182819	0.000229095
657	0	0.000177084	0.000223789
658	0	0.000171433	0.000218557
659	0	0.000165877	0.000213403
660	0	0.000160428	0.000208333
661	0	0.000155096	0.000203351
662	0	0.000149892	0.000198461
663	0	0.000144824	0.000193666
664	0	0.000139902	0.000188969
665	0	0.000135133	0.000184374
666	0	0.000130524	0.000179881
667	0	0.000126079	0.000175494
668	0	0.000121803	0.000171213
669	0	0.000117699	0.000167039
670	0	0.000113769	0.000162974
671	0	0.000110013	0.000159019
672	0	0.000106433	0.000155172
673	0	0.000103027	0.000151435
674	0	9.97943e-05	0.000147808
675	0	9.6734e-05	0.000144292
676	0	9.38404e-05	0.000140883
677	0	9.11097e-05	0.000137582
678	0	8.85381e-05	0.000134388
679	0	8.61209e-05	0.000131299
680	0	8.38536e-05	0.000128314
681	0	8.17311e-05	0.000125432
682	0	7.97482e-05	0.000122651
683	0	7.78994e-05	0.00011997
684	0	7.61792e-05	0.000117387
685	0	7.45818e-05	0.0001149
686	0	7.31013e-05	0.000112507
687	0	7.17316e-05	0.000110206
688	0	7.04665e-05	0.000107995
689	0	6.92997e-05	0.000105871
690	0	6.82245e-05	0.000103831
691	0	6.72342e-05	0.000101874
692	0	6.63221e-05	9.99957e-05
693	0	6.54812e-05	9.81943e-05
694	0	6.47044e-05	9.64667e-05
695	0	6.39849e-05	9.48099e-05
696	0	6.33155e-05	9.32211e-05
697	0	6.26894e-05	9.16973e-05
698	0	6.20997e-05	9.02355e-05
699	0	6.15401e-05	8.88329e-05
700	0	6.10044e-05	8.74867e-05
701	0	6.04867e-05	8.61942e-05
702	0	5.99817e-05	8.49528e-05
703	0	5.94846e-05	8.376e-05
704	0	5.89914e-05	8.26137e-05
705	0	5.84982e-05	8.15116e-05
706	0	5.80024e-05	8.04519e-05
707	0	5.75016e-05	7.9433e-05
708	0	5.69943e-05	7.84532e-05
709	0	5.64797e-05	7.75112e-05
710	0	5.59574e-05	7.6606e-05
711	0	5.54277e-05	7.57366e-05
712	0	5.48914e-05	7.4902e-05
713	0	5.43498e-05	7.41015e-05
714	0	5.38044e-05	7.33345e-05
715	0	5.3257e-05	7.26004e-05
716	0	5.27098e-05	7.18988e-05
717	0	5.2165e-05	7.12295e-05
718	0	5.16246e-05	7.05912e-05
719	0	5.10909e-05	6.99835e-05
720	0	5.05659e-05	6.94056e-05
721	0	5.00516e-05	6.88567e-05
722	0	4.95498e-05	6.8336e-05
723	0	4.90622e-05	6.78427e-05
724	0	4.85903e-05	6.73758e-05
725	0	4.81357e-05	6.69344e-05
726	0	4.76996e-05	6.65176e-05
727	0	4.72834e-05	6.61243e-05
728	0	4.68885e-05	6.57538e-05
729	0	4.65163e-05	6.54051e-05
730	0	4.6168e-05	6.50776e-05
731	0	4.58454e-05	6.47706e-05
732	0	4.55499e-05	6.44836e-05
733	0	4.52835e-05	6.42163e-05
734	0	4.50478e-05	6.39683e-05
735	0	4.48448e-05	6.37396e-05
736	0	4.46764e-05	6.35302e-05
737	0	4.45445e-05	6.33401e-05
738	0	4.44509e-05	6.31693e-05
739	0	4.43971e-05	6.3018e-05
740	0	4.43845e-05	6.28862e-05
741	0	4.4414e-05	6.2774e-05
742	0	4.44861e-05	6.26811e-05
743	0	4.46007e-05	6.26073e-05
744	0	4.47572e-05	6.25521e-05
745	0	4.49541e-05	6.25147e-05
746	0	4.51895e-05	6.24941e-05
747	0	4.54604e-05	6.2489e-05
748	0	4.57634e-05	6.24979e-05
749	0	4.6094e-05	6.25189e-05
750	0	4.64473e-05	6.25499e-05
751	0	4.68175e-05	6.25885e-05
752	0	4.71985e-05	6.26322e-05
753	0	4.75835e-05	6.2678e-05
754	0	4.79656e-05	6.27232e-05
755	0	4.83375e-05	6.27646e-05
756	0	4.86918e-05	6.27992e-05
757	0	4.90214e-05	6.28239e-05
758	0	4.9319e-05	6.28358e-05
759	0	4.95773e-05	6.28315e-05
760	0	4.97906e-05	6.28086e-05
761	0	4.99535e-05	6.27646e-05
762	0	5.0061e-05	6.26973e-05
763	0	5.01093e-05	6.26046e-05
764	0	5.00952e-05	6.24851e-05
765	0	5.00164e-05	6.23373e-05
766	0	4.98717e-05	6.21603e-05
767	0	4.96609e-05	6.19535e-05
768	0	4.93844e-05	6.17169e-05
769	0	4.9044e-05	6.14504e-05
770	0	4.86418e-05	6.11548e-05
771	0	4.8181e-05	6.08308e-05
772	0	4.76654e-05	6.04798e-05
773	0	4.70995e-05	6.01031e-05
774	0	4.64879e-05	5.97028e-05
775	0	4.5836e-05	5.92808e-05
776	0	4.51493e-05	5.88396e-05
777	0	4.44334e-05	5.83816e-05
778	0	4.3694e-05	5.79095e-05
779	0	4.29368e-05	5.74263e-05
780	0	4.21674e-05	5.69348e-05
781	0	4.13912e-05	5.64381e-05
782	0	4.06134e-05	5.59393e-05
783	0	3.98387e-05	5.54416e-05
784	0	3.90718e-05	5.49479e-05
785	0	3.83167e-05	5.44614e-05
786	0	3.75773e-05	5.39851e-05
787	0	3.6857e-05	5.35218e-05
788	0	3.61588e-05	5.30744e-05
789	0	3.54854e-05	5.26455e-05
790	0	3.48389e-05	5.22375e-05
791	0	3.42215e-05	5.18529e-05
792	0	3.36348e-05	5.14937e-05
793	0	3.30801e-05	5.11617e-05
794	0	3.25586e-05	5.08589e-05
795	0	3.20712e-05	5.05865e-05
796	0	3.16185e-05	5.03458e-05
797	0	3.12011e-05	5.01378e-05
798	0	3.08194e-05	4.99632e-05
799	0	3.04737e-05	4.98226e-05
800	0	3.01641e-05	4.97162e-05
801	0	2.98915e-05	4.96448e-05
802	0	2.96552e-05	4.96075e-05
803	0	2.9455e-05	4.96038e-05
804	0	2.92909e-05	4.96333e-05
805	0	2.91625e-05	4.96952e-05
806	0	2.90698e-05	4.97885e-05
807	0	2.90122e-05	4.99122e-05
808	0	2.89894e-05	5.00651e-05
809	0	2.90006e-05	5.0246e-05
810	2.08484e-07	2.901e-05	5.0419e-05
811	8.97233e-07	2.89706e-05	5.05378e-05
812	1.53876e-06	2.89706e-05	5.0688e-05
813	2.12751e-06	2.90097e-05	5.0869e-05
814	2.65857e-06	2.90871e-05	5.10799e-05
815	3.1277e-06	2.92019e-05	5.13197e-05
816	3.53144e-06	2.93524e-05	5.15875e-05
817	3.86712e-06	2.9537e-05	5.18818e-05
818	4.13287e-06	2.97532e-05	5.22012e-05
819	4.32761e-06	2.99985e-05	5.25444e-05
820	4.45103e-06	3.02697e-05	5.29095e-05
821	4.50352e-06	3.05636e-05	5.32949e-05
822	4.48614e-06	3.08764e-05	5.36987e-05
823	4.40049e-06	3.12042e-05	5.4119e-05
824	4.24866e-06	3.1543e-05	5.4554e-05
825	4.03313e-06	3.18886e-05	5.50018e-05
826	3.75668e-06	3.22368e-05	5.54607e-05
827	3.42232e-06	3.25836e-05	5.59288e-05
828	3.03318e-06	3.2925e-05	5.64048e-05
829	2.59248e-06	3.32573e-05	5.68872e-05
830	2.10346e-06	3.35773e-05	5.73749e-05
831	1.56935e-06	3.38819e-05	5.78671e-05
832	9.93366e-07	3.41686e-05	5.8363e-05
833	3.78654e-07	3.44355e-05	5.88624e-05
834	0	3.46349e-05	5.93205e-05
835	0	3.47424e-05	5.97145e-05
836	0	3.48222e-05	6.01081e-05
837	0	3.48749e-05	6.05028e-05
838	0	3.49017e-05	6.09003e-05
839	0	3.49044e-05	6.13027e-05
840	0	3.48848e-05	6.17124e-05
841	0	3.48456e-05	6.21319e-05
842	0	3.47895e-05	6.2564e-05
843	0	3.47192e-05	6.3012e-05
844	0	3.46382e-05	6.34788e-05
845	0	3.45498e-05	6.39676e-05
846	0	3.44572e-05	6.44815e-05
847	0	3.43634e-05	6.50239e-05
848	0	3.42714e-05	6.55979e-05
849	0	3.41841e-05	6.62066e-05
850	0	3.41039e-05	6.68532e-05
851	0	3.40331e-05	6.75405e-05
852	0	3.39734e-05	6.82715e-05
853	0	3.39265e-05	6.90487e-05
854	0	3.38935e-05	6.98747e-05
855	0	3.38751e-05	7.07519e-05
856	0	3.38719e-05	7.16826e-05
857	0	3.3884e-05	7.26687e-05
858	0	3.39111e-05	7.37123e-05
859	0	3.39527e-05	7.48151e-05
860	0	3.40082e-05	7.59789e-05
861	0	3.40766e-05	7.72052e-05
862	0	3.41567e-05	7.84955e-05
863	0	3.42473e-05	7.98513e-05
864	0	3.43471e-05	8.12738e-05
865	0	3.44549e-05	8.27643e-05
866	0	3.45692e-05	8.4324e-05
867	0	3.46889e-05	8.59542e-05
868	0	3.48129e-05	8.76561e-05
869	0	3.49401e-05	8.94306e-05
870	0	3.50699e-05	9.12791e-05
871	0	3.52017e-05	9.32027e-05
872	0	3.53352e-05	9.52024e-05
873	0	3.54704e-05	9.72795e-05
874	0	3.56075e-05	9.9435e-05
875	0	3.57471e-05	0.00010167
876	0	3.58899e-05	0.000103986
877	0	3.6037e-05	0.000106383
878	0	3.61896e-05	0.000108863
879	0	3.6349e-05	0.000111427
880	0	3.65169e-05	0.000114074
881	0	3.66946e-05	0.000116807
882	0	3.68839e-05	0.000119624
883	0	3.70861e-05	0.000122527
884	0	3.73026e-05	0.000125515
885	0	3.75348e-05	0.000128588
886	0	3.77834e-05	0.000131746
887	0	3.8049e-05	0.000134987
888	0	3.83317e-05	0.000138308
889	0	3.86315e-05	0.000141708
890	0	3.89479e-05	0.000145186
891	0	3.928e-05	0.000148738
892	0	3.96268e-05	0.000152363
893	0	3.99868e-05	0.000156056
894	0	4.03583e-05	0.000159816
895	0	4.07394e-05	0.00016364
896	0	4.11282e-05	0.000167525
897	0	4.15224e-05	0.000171468
898	0	4.19202e-05	0.000175467
899	0	4.23195e-05	0.000179521
900	0	4.27185e-05	0.000183628
901	0	4.31155e-05	0.000187788
902	0	4.35093e-05	0.000191999
903	0	4.38986e-05	0.000196263
904	0	4.42827e-05	0.000200581
905	0	4.46612e-05	0.000204955
906	0	4.50339e-05	0.000209386
907	0	4.54012e-05	0.000213878
908	0	4.57634e-05	0.000218435
909	0	4.61214e-05	0.00022306
910	0	4.64764e-05	0.000227757
911	0	4.68297e-05	0.000232532
912	0	4.71828e-05	0.00023739
913	0	4.75374e-05	0.000242335
914	0	4.78953e-05	0.000247373
915	0	4.82584e-05	0.000252508
916	0	4.86285e-05	0.000257744
917	0	4.90076e-05	0.000263087
918	0	4.93974e-05	0.00026854
919	0	4.97996e-05	0.000274107
920	0	5.02158e-05	0.00027979
921	0	5.06473e-05	0.000285591
922	0	5.10951e-05	0.000291513
923	0	5.15601e-05	0.000297556
924	0	5.20429e-05	0.00030372
925	0	5.25435e-05	0.000310006
926	0	5.30618e-05	0.000316412
927	0	5.35975e-05	0.000322939
928	0	5.41495e-05	0.000329584
929	0	5.47164e-05	0.000336345
930	0	5.52963e-05	0.000343217
931	0	5.58872e-05	0.0003502
932	0	5.64866e-05	0.00035729
933	0	5.70918e-05	0.000364483
934	0	5.76996e-05	0.000371779
935	0	5.83069e-05	0.000379174
936	0	5.89099e-05	0.000386665
937	0	5.95049e-05	0.000394252
938	0	6.00883e-05	0.000401933
939	0	6.06559e-05	0.000409707
940	0	6.1204e-05	0.000417574
941	0	6.17288e-05	0.000425534
942	0	6.22265e-05	0.000433588
943	0	6.26938e-05	0.000441737
944	0	6.31273e-05	0.000449982
945	0	6.35243e-05	0.000458326
946	0	6.38821e-05	0.000466772
947	0	6.41986e-05	0.000475323
948	0	6.44716e-05	0.000483984
949	0	6.46996e-05	0.000492757
950	0	6.48809e-05	0.00050165
951	0	6.50143e-05	0.000510668
952	0	6.50983e-05	0.000519818
953	0	6.51318e-05	0.000529109
954	0	6.51135e-05	0.000538548
955	0	6.50423e-05	0.000548144
956	0	6.49177e-05	0.000557907
957	0	6.47392e-05	0.000567847
958	0	6.45075e-05	0.00057797
959	0	6.42237e-05	0.000588284
960	0	6.38902e-05	0.000598796
961	0	6.35106e-05	0.000609508
962	0	6.30893e-05	0.000620424
963	0	6.26316e-05	0.000631544
964	0	6.21433e-05	0.000642867
965	0	6.16304e-05	0.000654393
966	0	6.10984e-05	0.00066612
967	0	6.05517e-05	0.000678049
968	0	5.99937e-05	0.000690178
969	0	5.94258e-05	0.000702514
970	0	5.88476e-05	0.000715061
971	0	5.82573e-05	0.000727821
972	0	5.76513e-05	0.000740803
973	0	5.70246e-05	0.000754014
974	0	5.63718e-05	0.000767463
975	0	5.5687e-05	0.000781155
976	0	5.49644e-05	0.000795098
977	0	5.41985e-05	0.000809295
978	0	5.33842e-05	0.000823749
979	0	5.25171e-05	0.000838459
980	0	5.1593e-05	0.000853422
981	0	5.06081e-05	0.000868634
982	0	4.95585e-05	0.000884088
983	0	4.84402e-05	0.000899776
984	0	4.72485e-05	0.000915689
985	0	4.59779e-05	0.000931819
986	0	4.46222e-05	0.000948154
987	0	4.31741e-05	0.000964686
988	0	4.16253e-05	0.000981404
989	0	3.99669e-05	0.0009983
990	0	3.81893e-05	0.00101536
991	0	3.62827e-05	0.00103259
992	0	3.42375e-05	0.00104997
993	0	3.20446e-05	0.0010675
994	0	2.96962e-05	0.00108516
995	0	2.71861e-05	0.00110296
996	0	2.45103e-05	0.00112088
997	0	2.16672e-05	0.00113891
998	0	1.86584e-05	0.00115705
999	0	1.54885e-05	0.00117528
1000	0	1.21651e-05	0.00119358
1001	0	8.69938e-06	0.00121195
1002	0	5.10503e-06	0.00123036
1003	0	1.39837e-06	0.00124879
1004	0	0	0.0012672
1005	0	0	0.00128557
1006	0	0	0.00130389
1007	0	0	0.00132215
1008	0	0	0.00134033
1009	0	0	0.0013584
1010	0	0	0.00137636
1011	0	0	0.00139419
1012	0	0	0.00141188
1013	0	0	0.00142944
1014	0	0	0.00144686
1015	0	0	0.00146415
1016	0	0	0.0014813
1017	0	0	0.00149834
1018	0	0	0.00151525
1019	0	0	0.00153203
1020	0	0	0.00154869
1021	0	0	0.00156521
1022	0	0	0.00158157
1023	0	0	0.00159776
1024	0	0	0.00161375
1025	0	0	0.0016295
1026	0	0	0.001645
1027	0	0	0.0016602
1028	0	0	0.00167507
1029	0	0	0.00168959
1030	0	0	0.00170372
1031	0	0	0.00171745
1032	0	0	0.00173074
1033	0	0	0.00174359
1034	0	0	0.00175597
1035	0	0	0.00176787
1036	0	0	0.00177929
1037	0	0	0.00179022
1038	0	0	0.00180065
1039	0	0	0.00181059
1040	0	0	0.00182004
1041	0	0	0.001829
1042	0	0	0.00183748
1043	0	0	0.00184549
1044	0	0	0.00185305
1045	0	0	0.00186017
1046	0	0	0.00186688
1047	0	0	0.00187319
1048	0	0	0.00187914
1049	0	0	0.00188473
1050	0	0	0.00189001
1051	0	0	0.001895
1052	0	0	0.00189973
1053	0	0	0.00190422
1054	0	0	0.0019085
1055	0	0	0.00191258
1056	0	0	0.00191647
1057	0	0	0.00192019
1058	0	0	0.00192373
1059	0	0	0.00192708
1060	0	0	0.00193021
1061	0	0	0.00193311
1062	0	0	0.00193574
1063	0	0	0.0019381
1064	0	0	0.00194015
1065	0	0	0.00194188
1066	0	0	0.00194329
1067	0	0	0.00194437
1068	0	0	0.00194514
1069	0	0	0.0019456
1070	0	0	0.00194578
1071	0	0	0.00194567
1072	0	0	0.0019453
1073	0	0	0.00194465
1074	0	0	0.00194373
1075	0	0	0.0019425
1076	0	0	0.00194095
1077	0	0	0.00193904
1078	0	0	0.00193672
1079	0	0	0.00193397
1080	0	0	0.00193073
1081	0	0	0.00192698
1082	0	0	0.00192268
1083	0	0	0.00191781
1084	0	0	0.00191236
1085	0	0	0.00190631
1086	0	0	0.00189965
1087	0	0	0.00189239
1088	0	0	0.00188452
1089	0	0	0.00187605
1090	0	0	0.00186699
1091	0	0	0.00185735
1092	0	0	0.00184716
1093	0	0	0.00183645
1094	0	0	0.00182527
1095	0	0	0.00181365
1096	0	0	0.00180166
1097	0	0	0.00178937
1098	0	0	0.00177685
1099	0	0	0.00176416
1100	0	0	0.00175137
1101	0	0	0.00173853
1102	0	0	0.00172571
1103	0	0	0.00171293
1104	0	0	0.00170023
1105	0	0	0.00168762
1106	0	0	0.00167511
1107	0	0	0.0016627
1108	0	0	0.00165039
1109	0	0	0.00163818
1110	0	0	0.00162605
1111	0	0	0.00161402
1112	0	0	0.00160208
1113	0	0	0.00159025
1114	0	0	0.00157855
1115	0	0	0.00156701
1116	0	0	0.00155566
1117	0	0	0.00154454
1118	0	0	0.00153368
1119	0	0	0.00152312
1120	0	0	0.00151289
1121	0	0	0.00150301
1122	0	0	0.00149351
1123	0	0	0.00148439
1124	0	0	0.00147568
1125	0	0	0.00146736
1126	0	0	0.00145945
1127	0	0	0.00145192
1128	0	0	0.00144478
1129	0	0	0.001438
1130	0	0	0.00143158
1131	0	0	0.00142549
1132	0	0	0.00141971
1133	0	0	0.00141422
1134	0	0	0.00140899
1135	0	0	0.00140399
1136	0	0	0.00139918
1137	0	0	0.00139452
1138	0	0	0.00138998
1139	0	0	0.0013855
1140	0	0	0.00138104
1141	0	0	0.00137655
1142	0	0	0.001372
1143	0	0	0.00136733
1144	0	0	0.00136252
1145	0	0	0.00135755
1146	0	0	0.00135238
1147	0	0	0.00134701
1148	0	0	0.00134142
1149	0	0	0.00133561
1150	0	0	0.00132958
1151	0	0	0.00132333
1152	0	0	0.00131688
1153	0	0	0.00131023
1154	0	0	0.0013034
1155	0	0	0.00129639
1156	0	0	0.00128922
1157	0	0	0.00128189
1158	0	0	0.00127443
1159	0	0	0.00126684
1160	0	0	0.00125913
1161	0	0	0.0012513
1162	0	0	0.00124337
1163	0	0	0.00123532
1164	0	0	0.00122718
1165	0	0	0.00121893
1166	0	0	0.00121057
1167	0	0	0.00120212
1168	0	0	0.00119355
1169	0	0	0.00118488
1170	0	0	0.0011761
1171	0	0	0.00116721
1172	0	0	0.00115822
1173	0	0	0.00114913
1174	0	0	0.00113994
1175	0	0	0.00113067
1176	0	0	0.00112133
1177	0	0	0.00111193
1178	0	0	0.00110249
1179	0	0	0.00109303
1180	0	0	0.00108357
1181	0	0	0.00107414
1182	0	0	0.00106476
1183	0	0	0.00105543
1184	0	0	0.00104619
1185	0	0	0.00103705
1186	0	0	0.00102801
1187	0	0	0.00101908
1188	0	0	0.00101026
1189	0	0	0.00100156
1190	0	0	0.000992969
1191	0	0	0.000984479
1192	0	0	0.000976084
1193	0	0	0.000967774
1194	0	0	0.000959541
1195	0	0	0.000951376
1196	0	0	0.000943273
1197	0	0	0.000935227
1198	0	0	0.000927233
1199	0	0	0.000919291
1200	0	0	0.0009114
1201	0	0	0.00090356
1202	0	0	0.000895772
1203	0	0	0.000888037
1204	0	0	0.000880355
1205	0	0	0.000872724
1206	0	0	0.000865144
1207	0	0	0.000857612
1208	0	0	0.000850125
1209	0	0	0.000842682
1210	0	0	0.00083528
1211	0	0	0.00082792
1212	0	0	0.000820601
1213	0	0	0.000813327
1214	0	0	0.000806102
1215	0	0	0.000798932
1216	0	0	0.000791823
1217	0	0	0.000784783
1218	0	0	0.000777821
1219	0	0	0.000770944
1220	0	0	0.000764159
1221	0	0	0.000757473
1222	0	0	0.000750892
1223	0	0	0.000744417
1224	0	0	0.000738051
1225	0	0	0.000731792
1226	0	0	0.000725639
1227	0	0	0.000719589
1228	0	0	0.000713639
1229	0	0	0.000707782
1230	0	0	0.000702016
1231	0	0	0.000696336
1232	0	0	0.000690739
1233	0	0	0.000685225
1234	0	0	0.000679794
1235	0	0	0.000674448
1236	0	0	0.00066919
1237	0	0	0.000664022
1238	0	0	0.000658948
1239	0	0	0.00065397
1240	0	0	0.000649088
1241	0	0	0.000644301
1242	0	0	0.000639607
1243	0	0	0.000635003
1244	0	0	0.000630485
1245	0	0	0.000626048
1246	0	0	0.000621691
1247	0	0	0.000617412
1248	0	0	0.000613211
1249	0	0	0.000609091
1250	0	0	0.000605055
1251	0	0	0.000601108
1252	0	0	0.000597255
1253	0	0	0.0005935
1254	0	0	0.000589845
1255	0	0	0.000586293
1256	0	0	0.000582843
1257	0	0	0.000579492
1258	0	0	0.000576235
1259	0	0	0.000573068
1260	0	0	0.000569983
1261	0	0	0.000566973
1262	0	0	0.000564033
1263	0	0	0.000561156
1264	0	0	0.00055834
1265	0	0	0.00055558
1266	0	0	0.000552876
1267	0	0	0.000550227
1268	0	0	0.000547637
1269	0	0	0.000545108
1270	0	0	0.000542645
1271	0	0	0.000540252
1272	0	0	0.000537936
1273	0	0	0.000535701
1274	0	0	0.000533554
1275	0	0	0.000531501
1276	0	0	0.000529547
1277	0	0	0.000527696
1278	0	0	0.000525954
1279	0	0	0.000524323
1280	0	0	0.000522808
1281	0	0	0.000521409
1282	0	0	0.000520127
1283	0	0	0.000518961
1284	0	0	0.000517908
1285	0	0	0.000516965
1286	0	0	0.000516126
1287	0	0	0.000515385
1288	0	0	0.000514737
1289	0	0	0.000514174
1290	0	0	0.000513693
1291	0	0	0.000513289
1292	0	0	0.000512963
1293	0	0	0.000512715
1294	0	0	0.000512549
1295	0	0	0.000512474
1296	0	0	0.000512499
1297	0	0	0.000512634
1298	0	0	0.000512892
1299	0	0	0.000513285
1300	0	0	0.000513825
1301	0	0	0.000514523
1302	0	0	0.000515387
1303	0	0	0.000516427
1304	0	0	0.000517645
1305	0	0	0.000519045
1306	0	0	0.000520627
1307	3.55226e-06	0	0.000521792
1308	9.62503e-06	0	0.000522701
1309	1.65076e-05	0	0.000523628
1310	2.40818e-05	0	0.000524575
1311	3.21824e-05	0	0.000525549
1312	4.06033e-05	0	0.00052656
1313	4.91089e-05	0	0.00052762
1314	5.74497e-05	0	0.000528742
1315	6.53816e-05	0	0.00052994
1316	7.2686e-05	0	0.000531223
1317	7.91894e-05	0	0.000532598
1318	8.47786e-05	0	0.000534064
1319	8.94109e-05	0	0.000535615
1320	9.31169e-05	0	0.000537237
1321	9.59961e-05	0	0.000538912
1322	9.82053e-05	0	0.000540613
1323	9.99423e-05	0	0.000542312
1324	0.000101427	0	0.00054398
1325	0.000102879	0	0.000545588
1326	0.000104504	0	0.000547107
1327	0.000106475	0	0.000548517
1328	0.000108927	0	0.000549799
1329	0.000111948	0	0.00055094
1330	0.000115582	0	0.000551935
1331	0.000119837	0	0.000552781
1332	0.000124687	0	0.00055348
1333	0.000130085	0	0.000554034
1334	0.000135975	0	0.000554448
1335	0.000142296	0	0.000554725
1336	0.000148994	0	0.000554866
1337	0.000156021	0	0.000554871
1338	0.000163339	0	0.00055474
1339	0.000170912	0	0.000554474
1340	0.000178697	0	0.000554077
1341	0.000186637	0	0.000553559
1342	0.00019465	0	0.000552937
1343	0.000202633	0	0.000552239
1344	0.000210458	0	0.000551496
1345	0.000217995	0	0.000550747
1346	0.000225126	0	0.000550031
1347	0.000231771	0	0.000549382
1348	0.000237906	0	0.000548823
1349	0.000243593	0	0.000548367
1350	0.000248968	0	0.000548006
1351	0.000254226	0	0.000547724
1352	0.00025959	0	0.000547492
1353	0.000265285	0	0.00054728
1354	0.000271496	0	0.000547056
1355	0.000278342	0	0.000546796
1356	0.000285856	0	0.000546485
1357	0.000293981	0	0.000546115
1358	0.000302581	0	0.000545694
1359	0.000311457	0	0.000545232
1360	0.00032038	0	0.000544746
1361	0.000329122	0	0.000544254
1362	0.00033749	0	0.000543771
1363	0.000345345	0	0.000543306
1364	0.000352626	0	0.000542863
1365	0.00035936	0	0.000542435
1366	0.000365656	0	0.00054201
1367	0.000371696	0	0.000541569
1368	0.000377719	0	0.000541085
1369	0.000383997	0	0.000540532
1370	0.000390811	0	0.00053988
1371	0.000398429	0	0.000539101
1372	0.000407088	0	0.000538169
1373	0.000416989	0	0.000537063
1374	0.000428295	0	0.000535762
1375	0.000441143	0	0.000534249
1376	0.000455665	0	0.000532505
1377	0.000472006	0	0.000530509
1378	0.000490352	0	0.000528233
1379	0.000510949	0	0.000525642
1380	0.000534106	0	0.000522692
1381	0.000560195	0	0.000519333
1382	0.000589621	0	0.00051551
1383	0.00062278	0	0.000511172
1384	0.000660009	0	0.000506277
1385	0.00070152	0	0.000500806
1386	0.000747353	0	0.000494764
1387	0.000797349	0	0.000488188
1388	0.000851147	0	0.000481144
1389	0.000908242	0	0.00047372
1390	0.000968088	0	0.000466009
1391	0.00103015	0	0.000458097
1392	0.00109409	0	0.00045004
1393	0.00115986	0	0.00044184
1394	0.0012278	0	0.000433441
1395	0.00129864	0	0.000424725
1396	0.00137346	0	0.00041552
1397	0.00145366	0	0.000405602
1398	0.00154087	0	0.000394713
1399	0.00163689	0	0.000382573
1400	0.00174362	0	0.000368883
1401	0.00186296	0	0.00035334
1402	0.00199683	0	0.000335646
1403	0.00214698	0	0.000315516
1404	0.00231495	0	0.000292703
1405	0.0025019	0	0.000267013
1406	0.00270847	0	0.000238333
1407	0.00293468	0	0.000206646
1408	0.00317985	0	0.000172046
1409	0.00344262	0	0.000134732
1410	0.00372099	0	9.50072e-05
1411	0.00401245	0	5.32513e-05
1412	0.00431373	1.79221e-05	9.7391e-06
1413	0.00459091	4.02389e-05	0
1414	0.00486258	5.96771e-05	0
1415	0.00513418	7.95727e-05	0
1416	0.00540243	9.92829e-05	0
1417	0.00566384	0.000118351	0
1418	0.00591475	0.00013656	0
1419	0.0061514	0.000153952	0
1420	0.00637009	0.000170788	0
1421	0.00656739	0.000187467	0
1422	0.00674045	0.000204406	0
1423	0.00688724	0.000221898	0
1424	0.00700684	0.000239971	0
1425	0.00709956	0.00025828	0
1426	0.00716699	0.000276044	0
1427	0.00721184	0.000292064	0
1428	0.00723764	0.000304821	0
1429	0.00724829	0.000312643	0
1430	0.00724758	0.000313928	0
1431	0.00723873	0.000307386	0
1432	0.00722398	0.000292168	0
1433	0.00720448	0.000268169	0
1434	0.00718033	0.000236171	0
1435	0.00715073	0.000197499	0
1436	0.00711434	0.000153976	0
1437	0.00706966	0.000107702	0
1438	0.00701531	6.0822e-05	0
1439	0.00695015	1.53203e-05	0
1440	0.00687254	0	0
1441	0.00678222	0	0
1442	0.00667891	0	0
1443	0.00656167	0	0
1444	0.00642934	0	0
1445	0.00628051	0	0
1446	0.00611378	0	0
1447	0.00592801	0	0
1448	0.00572262	0	0
1449	0.00549796	0	0
1450	0.00525545	0	0
1451	0.00499767	0	0
1452	0.0046941	0	3.84505e-05
1453	0.00437405	0	8.73666e-05
1454	0.00405154	0	0.000136504
1455	0.00373232	0	0.000184971
1456	0.0034217	0	0.00023195
1457	0.00312423	0	0.000276757
1458	0.00284338	0	0.00031888
1459	0.00258151	0	0.000357988
1460	0.00233987	0	0.000393919
1461	0.00211883	0	0.000426649
1462	0.00191807	0	0.000456252
1463	0.00173684	0	0.000482857
1464	0.00157419	0	0.000506618
1465	0.00142907	0	0.000527687
1466	0.00130046	0	0.000546208
1467	0.00118733	0	0.000562321
1468	0.00108865	0	0.000576169
1469	0.00100327	0	0.000587908
1470	0.000929947	0	0.000597722
1471	0.000867284	0	0.000605819
1472	0.000813782	0	0.000612434
1473	0.00076789	0	0.000617813
1474	0.000728117	0	0.000622196
1475	0.000693061	0	0.000625811
1476	0.000661434	0	0.000628864
1477	0.000632291	0	0.000631505
1478	0.000604961	0	0.000633838
1479	0.00057903	0	0.000635916
1480	0.00055431	0	0.000637758
1481	0.000530787	0	0.000639348
1482	0.00050856	0	0.000640651
1483	0.000487795	0	0.000641623
1484	0.00046868	0	0.000642214
1485	0.000451397	0	0.000642381
1486	0.000436106	0	0.000642084
1487	0.000422936	0	0.000641293
1488	0.00041198	0	0.000639984
1489	0.000403297	0	0.000638145
1490	0.000396899	0	0.000635768
1491	0.000392747	0	0.000632859
1492	0.000390733	0	0.000629433
1493	0.000390667	0	0.000625518
1494	0.000392256	0	0.000621161
1495	0.000395103	0	0.000616425
1496	0.000398701	0	0.000611389
1497	0.000402458	0	0.000606148
1498	0.000405732	0	0.000600805
1499	0.00040788	0	0.000595466
1500	0.000408326	0	0.000590226
1501	0.000406622	0	0.000585161
1502	0.000402512	0	0.000580316
1503	0.00039596	0	0.000575706
1504	0.000387163	0	0.000571305
1505	0.000376518	0	0.000567059
1506	0.000364575	0	0.000562889
1507	0.000351953	0	0.000558708
1508	0.000339263	0	0.000554428
1509	0.00032703	0	0.000549978
1510	0.000315636	0	0.000545309
1511	0.00030529	0	0.000540401
1512	0.000296024	0	0.000535261
1513	0.000287725	0	0.000529918
1514	0.000280172	0	0.000524419
1515	0.000273096	0	0.000518813
1516	0.000266237	0	0.000513153
1517	0.000259381	0	0.000507478
1518	0.00025241	0	0.000501816
1519	0.00024531	0	0.000496177
1520	0.000238157	0	0.000490557
1521	0.000231096	0	0.000484947
1522	0.000224301	0	0.00047933
1523	0.000217936	0	0.000473698
1524	0.000212115	0	0.000468048
1525	0.000206881	0	0.000462393
1526	0.000202193	0	0.000456757
1527	0.000197936	0	0.000451176
1528	0.000193949	0	0.000445691
1529	0.000190057	0	0.000440342
1530	0.000186106	0	0.000435164
1531	0.000181994	0	0.000430178
1532	0.000177685	0	0.000425392
1533	0.000173215	0	0.000420801
1534	0.000168675	0	0.000416388
1535	0.000164193	0	0.000412128
1536	0.000159909	0	0.000407995
1537	0.000155956	0	0.000403965
1538	0.000152445	0	0.000400016
1539	0.00014946	0	0.000396133
1540	0.000147065	0	0.000392305
1541	0.000145305	0	0.000388525
1542	0.000144216	0	0.000384792
1543	0.000143825	0	0.000381103
1544	0.000144145	0	0.000377462
1545	0.000145169	0	0.000373877
1546	0.000146851	0	0.000370365
1547	0.000149097	0	0.000366948
1548	0.000151759	0	0.000363663
1549	0.000154636	0	0.000360551
1550	0.000157489	0	0.000357662
1551	0.000160067	0	0.000355047
1552	0.000162139	0	0.000352752
1553	0.000163527	0	0.000350813
1554	0.000164131	0	0.000349252
1555	0.000163942	0	0.000348075
1556	0.000163042	0	0.000347271
1557	0.000161585	0	0.000346815
1558	0.000159774	0	0.000346677
1559	0.000157829	0	0.000346824
1560	0.000155963	0	0.000347216
1561	0.000154343	0	0.000347825
1562	0.000153093	0	0.000348631
1563	0.000152291	0	0.000349622
1564	0.000151975	0	0.000350792
1565	0.000152156	0	0.000352141
1566	0.000152829	0	0.000353669
1567	0.000153988	0	0.000355381
1568	0.000155627	0	0.000357277
1569	0.000157751	0	0.000359359
1570	0.000160368	0	0.000361627
1571	0.000163496	0	0.00036408
1572	0.000167155	0	0.000366717
1573	0.00017136	0	0.000369536
1574	0.000176124	0	0.000372538
1575	0.000181448	0	0.000375723
1576	0.000187323	0	0.000379097
1577	0.000193721	0	0.000382664
1578	0.000200602	0	0.000386433
1579	0.00020791	0	0.000390416
1580	0.000215573	0	0.000394625
1581	0.000223508	0	0.000399074
1582	0.000231624	0	0.000403778
1583	0.00023982	0	0.000408754
1584	0.000247999	0	0.000414014
1585	0.000256063	0	0.000419573
1586	0.000263926	0	0.000425441
1587	0.000271516	0	0.000431624
1588	0.000278785	0	0.000438125
1589	0.00028571	0	0.000444942
1590	0.000292302	0	0.000452064
1591	0.000298599	0	0.000459478
1592	0.000304668	0	0.000467166
1593	0.000310587	0	0.000475107
1594	0.000316436	0	0.000483282
1595	0.000322277	0	0.000491675
1596	0.000328141	0	0.000500275
1597	0.000334019	0	0.00050908
1598	0.000339863	0	0.000518094
1599	0.000345597	0	0.000527327
1600	0.000351137	0	0.00053679
1601	0.000356406	0	0.000546496
1602	0.000361386	0	0.000556441
1603	0.000366109	0	0.000566613
1604	0.000370671	0	0.000576992
1605	0.000375221	0	0.000587544
1606	0.00037994	0	0.000598229
1607	0.000385017	0	0.000609007
1608	0.000390619	0	0.000619835
1609	0.000396873	0	0.000630678
1610	0.000403857	0	0.000641505
1611	0.000411598	0	0.000652294
1612	0.000420081	0	0.000663027
1613	0.000429267	0	0.000673688
1614	0.000439102	0	0.000684263
1615	0.000449539	0	0.000694734
1616	0.000460535	0	0.000705082
1617	0.000472058	0	0.000715284
1618	0.000484077	0	0.000725316
1619	0.000496555	0	0.000735154
1620	0.000509439	0	0.000744774
1621	0.00052265	0	0.000754158
1622	0.000536083	0	0.000763291
1623	0.000549605	0	0.000772162
1624	0.000563063	0	0.000780764
1625	0.000576302	0	0.000789094
1626	0.000589175	0	0.000797146
1627	0.000601562	0	0.000804915
1628	0.000613387	0	0.00081239
1629	0.000624629	0	0.000819553
1630	0.000635323	0	0.000826381
1631	0.000645561	0	0.000832846
1632	0.000655478	0	0.000838911
1633	0.000665239	0	0.000844542
1634	0.000675011	0	0.000849701
1635	0.000684943	0	0.000854358
1636	0.000695142	0	0.000858485
1637	0.00070566	0	0.000862069
1638	0.000716483	0	0.000865104
1639	0.000727538	0	0.000867594
1640	0.000738707	0	0.00086955
1641	0.000749857	0	0.000870989
1642	0.000760872	0	0.000871923
1643	0.000771688	0	0.000872352
1644	0.000782343	0	0.00087228
1645	0.000792992	0	0.000871689
1646	0.000803919	0	0.000870543
1647	0.000815533	0	0.000868791
1648	0.000828349	0	0.000866368
1649	0.00084295	0	0.000863202
1650	0.000859946	0	0.000859221
1651	0.000879927	0	0.000854357
1652	0.00090341	0	0.000848555
1653	0.000930808	0	0.000841779
1654	0.000962398	0	0.000834013
1655	0.000998316	0	0.000825265
1656	0.00103856	0	0.000815562
1657	0.001083	0	0.000804949
1658	0.00113145	0	0.000793484
1659	0.00118365	0	0.000781226
1660	0.00123937	0	0.000768232
1661	0.00129841	0	0.000754549
1662	0.00136067	0	0.000740205
1663	0.00142615	0	0.000725208
1664	0.00149498	0	0.000709542
1665	0.00156741	0	0.000693169
1666	0.00164383	0	0.00067603
1667	0.00172468	0	0.000658052
1668	0.00181049	0	0.000639153
1669	0.0019018	0	0.000619247
1670	0.00199913	0	0.000598256
1671	0.00210297	0	0.00057611
1672	0.00221375	0	0.000552753
1673	0.0023318	0	0.000528149
1674	0.00245739	0	0.000502276
1675	0.00259071	0	0.000475129
1676	0.0027319	0	0.000446716
1677	0.00288102	0	0.000417058
1678	0.00303812	0	0.000386185
1679	0.00320314	0	0.000354142
1680	0.00337592	0	0.000320988
1681	0.00355614	0	0.000286813
1682	0.00374324	0	0.00025174
1683	0.00393633	0	0.000215944
1684	0.00413414	0	0.000179658
1685	0.00433498	0	0.000143178
1686	0.00453667	0	0.000106872
1687	0.00473675	0	7.1141e-05
1688	0.0049326	0	3.64061e-05
1689	0.00512165	0	3.07835e-06
1690	0.00527622	0	0
1691	0.00541873	0	0
1692	0.00555064	0	0
1693	0.0056712	0	0
1694	0.0057801	0	0
1695	0.00587744	0	0
1696	0.00596358	0	0
1697	0.00603896	0	0
1698	0.00610402	0	0
1699	0.00615903	0	0
1700	0.00620408	0	0
1701	0.00623905	0	0
1702	0.00626367	0	0
1703	0.00627759	0	0
1704	0.00628044	0	0
1705	0.006272	0	0
1706	0.00625223	0	0
1707	0.00622135	0	0
1708	0.0061799	0	0
1709	0.00612874	0	0
1710	0.00606899	0	0
1711	0.00600204	0	0
1712	0.00592935	0	0
1713	0.00585243	0	0
1714	0.00577262	0	0
1715	0.00569106	0	0
1716	0.00560855	0	0
1717	0.00552548	0	0
1718	0.00544189	0	0
1719	0.0053575	0	0
1720	0.00527177	0	0
1721	0.0051841	0	0
1722	0.00509387	8.04671e-07	0
1723	0.00499876	6.9198e-05	0
1724	0.00490054	0.000137142	0
1725	0.00479937	0.000204094	0
1726	0.00468934	0.000266707	7.2444e-06
1727	0.00457033	0.000324446	2.2645e-05
1728	0.0044499	0.000380437	3.86226e-05
1729	0.00432916	0.000434625	5.50297e-05
1730	0.00420915	0.000486729	7.17141e-05
1731	0.00409083	0.000536121	8.85328e-05
1732	0.00397495	0.000581754	0.000105367
1733	0.00386201	0.000622165	0.000122131
1734	0.0037523	0.000655569	0.000138773
1735	0.00364587	0.000680028	0.000155272
1736	0.00354261	0.000693694	0.000171628
1737	0.00344233	0.000695062	0.000187847
1738	0.00334479	0.000683215	0.000203934
1739	0.00324979	0.000658014	0.000219878
1740	0.00315716	0.000620187	0.000235654
1741	0.00306679	0.000571321	0.000251217
1742	0.00297859	0.000513733	0.000266514
1743	0.00289248	0.000450259	0.000281489
1744	0.00280837	0.000383969	0.00029609
1745	0.00272613	0.000317872	0.000310278
1746	0.00264565	0.00025464	0.000324021
1747	0.00256685	0.00019639	0.0003373
1748	0.00248973	0.000144549	0.000350094
1749	0.00241442	9.98178e-05	0.000362379
1750	0.00234119	6.22245e-05	0.000374122
1751	0.00227041	3.12486e-05	0.000385282
1752	0.00220256	5.99465e-06	0.000395815
1753	0.00213778	0	0.000405543
1754	0.00207668	0	0.000414555
1755	0.0020196	0	0.000422893
1756	0.00196658	0	0.000430565
1757	0.00191751	0	0.000437601
1758	0.00187219	0	0.000444047
1759	0.00183038	0	0.000449948
1760	0.00179183	0	0.000455346
1761	0.00175636	0	0.00046027
1762	0.00172388	0	0.000464738
1763	0.00169429	0	0.000468758
1764	0.00166751	0	0.000472337
1765	0.00164341	0	0.000475492
1766	0.00162173	0	0.000478257
1767	0.00160207	0	0.000480687
1768	0.0015839	0	0.000482857
1769	0.00156655	0	0.000484865
1770	0.00154927	0	0.00048682
1771	0.00153128	0	0.000488836
1772	0.00151187	0	0.000491013
1773	0.00149045	0	0.000493438
1774	0.00146657	0	0.000496168
1775	0.00144001	0	0.000499234
1776	0.00141074	0	0.000502629
1777	0.00137899	0	0.000506313
1778	0.00134519	0	0.000510215
1779	0.00130993	0	0.000514241
1780	0.00127391	0	0.00051828
1781	0.00123784	0	0.000522221
1782	0.00120236	0	0.000525966
1783	0.00116801	0	0.000529437
1784	0.00113509	0	0.00053259
1785	0.00110374	0	0.000535411
1786	0.00107388	0	0.000537916
1787	0.00104532	0	0.000540143
1788	0.0010178	0	0.000542137
1789	0.000991075	0	0.000543937
1790	0.000964981	0	0.00054557
1791	0.000939482	0	0.000547043
1792	0.000914666	0	0.000548339
1793	0.000890725	0	0.000549427
1794	0.000867912	0	0.000550269
1795	0.000846488	0	0.000550825
1796	0.000826672	0	0.000551068
1797	0.000808611	0	0.000550983
1798	0.000792367	0	0.000550574
1799	0.000777918	0	0.000549861
1800	0.000765179	0	0.000548877
1801	0.000754022	0	0.000547664
1802	0.000744298	0	0.000546268
1803	0.000735848	0	0.000544737
1804	0.000728508	0	0.000543117
1805	0.000722108	0	0.000541454
1806	0.000716463	0	0.000539793
1807	0.000711362	0	0.000538179
1808	0.000706571	0	0.000536657
1809	0.000701832	0	0.000535272
1810	0.000696871	0	0.000534067
1811	0.00069141	0	0.000533087
1812	0.000685194	0	0.00053237
1813	0.000678033	0	0.000531941
1814	0.000669795	0	0.000531822
1815	0.000660431	0	0.000532021
1816	0.000649981	0	0.000532537
1817	0.00063857	0	0.000533357
1818	0.0006264	0	0.000534456
1819	0.000613733	0	0.000535803
1820	0.000600865	0	0.000537355
1821	0.000588109	0	0.000539067
1822	0.000575765	0	0.00054089
1823	0.000564106	0	0.000542771
1824	0.000553357	0	0.000544659
1825	0.000543694	0	0.000546504
1826	0.000535234	0	0.000548256
1827	0.000528044	0	0.000549869
1828	0.000522142	0	0.000551298
1829	0.000517508	0	0.000552501
1830	0.000514093	0	0.000553439
1831	0.000511829	0	0.000554074
1832	0.000510633	0	0.000554374
1833	0.000510413	0	0.00055431
1834	0.000511069	0	0.000553858
1835	0.000512493	0	0.000552998
1836	0.000514572	0	0.000551719
1837	0.000517179	0	0.000550016
1838	0.000520181	0	0.000547893
1839	0.000523431	0	0.000545362
1840	0.000526781	0	0.000542442
1841	0.00053008	0	0.000539158
1842	0.000533185	0	0.000535541
1843	0.000535967	0	0.000531624
1844	0.000538323	0	0.000527443
1845	0.000540177	0	0.000523032
1846	0.000541486	0	0.000518422
1847	0.000542237	0	0.000513644
1848	0.000542439	0	0.000508724
1849	0.000542114	0	0.000503688
1850	0.000541283	0	0.000498559
1851	0.000539957	0	0.000493363
1852	0.000538117	0	0.000488127
1853	0.000535712	0	0.000482882
1854	0.000532655	0	0.000477665
1855	0.000528854	0	0.000472514
1856	0.000524198	0	0.000467469
1857	0.000518593	0	0.000462568
1858	0.000511979	0	0.000457844
1859	0.000504349	0	0.000453324
1860	0.000495763	0	0.000449022
1861	0.000486352	0	0.000444943
1862	0.0004763	0	0.000441081
1863	0.000465834	0	0.000437421
1864	0.000455189	0	0.000433944
1865	0.000444579	0	0.000430628
1866	0.000434168	0	0.000427456
1867	0.000424053	0	0.000424416
1868	0.000414254	0	0.000421505
1869	0.000404722	0	0.000418726
1870	0.00039536	0	0.000416086
1871	0.000386046	0	0.000413597
1872	0.00037667	0	0.000411265
1873	0.000367153	0	0.000409092
1874	0.000357474	0	0.000407073
1875	0.000347666	0	0.000405193
1876	0.000337818	0	0.00040343
1877	0.000328055	0	0.000401755
1878	0.000318511	0	0.000400141
1879	0.000309311	0	0.000398559
1880	0.000300542	0	0.000396989
1881	0.000292246	0	0.000395416
1882	0.00028441	0	0.000393835
1883	0.000276974	0	0.000392248
1884	0.000269843	0	0.000390666
1885	0.000262901	0	0.000389102
1886	0.000256032	0	0.00038757
1887	0.000249138	0	0.000386086
1888	0.000242148	0	0.00038466
1889	0.000235028	0	0.000383297
1890	0.000227779	0	0.000382
1891	0.000220435	0	0.000380762
1892	0.000213057	0	0.000379574
1893	0.00020572	0	0.000378421
1894	0.000198506	0	0.000377288
1895	0.000191494	0	0.000376153
1896	0.000184761	0	0.000374998
1897	0.000178359	0	0.000373801
1898	0.00017233	0	0.000372544
1899	0.000166705	0	0.000371209
1900	0.0001615	0	0.000369777
1901	0.000156726	0	0.000368235
1902	0.000152388	0	0.000366565
1903	0.000148486	0	0.000364757
1904	0.000145023	0	0.000362797
1905	0.000141998	0	0.000360675
1906	0.000139413	0	0.000358383
1907	0.000137268	0	0.000355915
1908	0.000135562	0	0.000353266
1909	0.00013429	0	0.000350436
1910	0.000133442	0	0.000347426
1911	0.000132999	0	0.000344241
1912	0.000132936	0	0.000340887
1913	0.000133217	0	0.000337376
1914	0.000133794	0	0.000333721
1915	0.000134609	0	0.000329936
1916	0.000135594	0	0.00032604
1917	0.000136672	0	0.000322049
1918	0.000137757	0	0.000317984
1919	0.000138761	0	0.000313862
1920	0.000139596	0	0.000309704
1921	0.000140179	0	0.000305525
1922	0.000140437	0	0.000301343
1923	0.000140313	0	0.000297171
1924	0.000139769	0	0.000293023
1925	0.000138791	0	0.000288909
1926	0.00013739	0	0.000284839
1927	0.000135601	0	0.000280818
1928	0.000133482	0	0.000276854
1929	0.000131108	0	0.00027295
1930	0.000128567	0	0.000269111
1931	0.000125952	0	0.00026534
1932	0.000123355	0	0.000261639
1933	0.000120862	0	0.000258013
1934	0.000118548	0	0.000254464
1935	0.00011647	0	0.000250998
1936	0.00011467	0	0.000247617
1937	0.000113172	0	0.000244327
1938	0.000111985	0	0.000241136
1939	0.000111087	0	0.000238048
1940	0.000110449	0	0.00023507
1941	0.000110027	0	0.00023221
1942	0.000109764	0	0.000229475
1943	0.0001096	0	0.000226874
1944	0.000109467	0	0.000224412
1945	0.000109304	0	0.000222097
1946	0.000109054	0	0.000219932
1947	0.000108669	0	0.000217921
1948	0.000108121	0	0.000216061
1949	0.000107394	0	0.00021435
1950	0.000106489	0	0.000212781
1951	0.000105421	0	0.000211344
1952	0.000104217	0	0.00021003
1953	0.000102904	0	0.000208826
1954	0.00010151	0	0.00020772
1955	0.000100057	0	0.000206702
1956	9.85539e-05	0	0.000205762
1957	9.70008e-05	0	0.000204893
1958	9.53849e-05	0	0.000204089
1959	9.36861e-05	0	0.000203346
1960	9.18811e-05	0	0.00020266
1961	8.99485e-05	0	0.000202029
1962	8.78742e-05	0	0.000201447
1963	8.56551e-05	0	0.00020091
1964	8.33014e-05	0	0.00020041
1965	8.08366e-05	0	0.000199941
1966	7.82955e-05	0	0.000199492
1967	7.57209e-05	0	0.000199054
1968	7.31594e-05	0	0.000198616
1969	7.06565e-05	0	0.000198169
1970	6.82531e-05	0	0.000197706
1971	6.59821e-05	0	0.000197218
1972	6.38672e-05	0	0.0001967
1973	6.19221e-05	0	0.00019615
1974	6.01515e-05	0	0.000195565
1975	5.85527e-05	0	0.000194945
1976	5.71175e-05	0	0.000194288
1977	5.58347e-05	0	0.000193597
1978	5.4692e-05	0	0.00019287
1979	5.36781e-05	0	0.00019211
1980	5.27859e-05	0	0.000191313
1981	5.20069e-05	0	0.000190482
1982	5.13388e-05	0	0.000189614
1983	5.07835e-05	0	0.000188707
1984	5.03465e-05	0	0.000187759
1985	5.00368e-05	0	0.000186767
1986	4.9866e-05	0	0.000185727
1987	4.98476e-05	0	0.000184636
1988	4.99956e-05	0	0.000183491
1989	5.03231e-05	0	0.000182289
1990	5.08406e-05	0	0.000181027
1991	5.15544e-05	0	0.000179705
1992	5.24643e-05	0	0.000178322
1993	5.3562e-05	0	0.000176882
1994	5.483e-05	0	0.000175388
1995	5.62403e-05	0	0.000173847
1996	5.77547e-05	0	0.000172268
1997	5.9325e-05	0	0.000170661
[truncated: 2,003 more rows]
[truncated: 70 more columns]

## Sheet: 4 Sources
Reconstructed Source Distributions							Compare Input & Reconstructed Sink Samples					Sink Sample Weights
Age (Ma)	Source 1	Source 2	Source 3	Source 4				Mean		St. Dev.			Princeton, Bluestone, Hinton	Surprise Canyon3- 06GC149, Surprise_Cyn2, SurpriseC_Cngl	24PL09, 10JM94, 40JM94, 05PL15, 09LB04	Mauch_Chunk	KY-21-SG	Tonka	Stanley, Hot_spring	BC05	09-CM-699	MS11, MS10	MS01, MSGE313	BC01, BC02, CC01	ML01, MP-DZ1	1QZ19	SY-D, Watahomigi, Manakacha1	Tumbling Run, Pottsville Fm, OH-1-SS	Pocohontas, Lee, VA-1-GN	Racoon, Montevallo, Sewanee	KY-18-CB	OH-4-SN	BCRA-01-10	MB1-3, MB2-4, MB2-2, MB2-3, MB2-5, MB2-1, MB1-2, MB1-1	a16, a23, a29, a38, a48, a49, a50	46-1, 46-2	IB_AD, IB_M1, IB_M2	FCB_AD	FCB_A2	FCB_A1	S3	GS01, GS09	MS04, MS05, MS06	MC05, MC17	GS11, GS24	MC20	EC01, RC01, RC19	V01, V10, V18, V20	V22, 25
0	3.99591e-08	5.07481e-08	0	4.96372e-08			Cross-correlation	0.7654	±	0.185548		Weights Source 1	0.000104083	0.00147828	0.000282766	0.00981454	0.00184781	0	0.0410787	0.00316822	0.0241472	0	0	0.0264363	0.00981909	0.00085714	0.00032019	0.00944789	0	0.00394606	0	6.27805e-05	0.00847194	8.36044e-05	0	0	0.00263963	0.00826119	0.00238992	0	0.0194237	0	0	0.0040881	0	0.00667454	0.00656057	0	0
1	4.00298e-08	5.08385e-08	0	4.97272e-08			Likeness	0.765562	±	0.109317		Weights Source 2	0.97212	0.774064	0.0490061	0.937067	0.846186	0.0725493	0.906459	0.208224	0.916962	0.557182	0.260584	0.054315	0.943779	0.519769	0.520361	0.969847	0.946577	0.925832	0.842405	0.976347	0.960079	0.866401	0.836386	0.876324	0.868784	0.888025	0.833277	0.949282	0.859917	0.324971	0.964281	0.348013	0	0.470246	0.13254	0	0
2	4.01713e-08	5.10195e-08	0	4.99072e-08			Kuiper V Value	0.170728	±	0.112839		Weights Source 3	0.0277761	0.0692403	0	0.0531185	0.0369524	0	0.0282307	0.195689	0.0588907	0.225153	0.161127	0.188972	0.0463231	0.0583672	0.0331037	0.0207055	0.0534234	0.0188789	0.0184376	0.0235906	0.0242611	0.0243627	0.0366411	0.0323808	0.0128403	0.0694343	0.0465659	0.0186893	0.0212302	0.163593	0.0357187	0.120574	0.41166	0.142646	0.0903898	0.0143503	0.0185041
3	4.03835e-08	5.1291e-08	0	5.01774e-08			KS D Value	0.138819	±	0.104267		Weights Source 4	0	0.155217	0.950711	0	0.115014	0.927451	0.0242317	0.592919	0	0.217665	0.578289	0.730277	7.85344e-05	0.421007	0.446215	0	0	0.0513429	0.139158	0	0.0071876	0.109153	0.126973	0.091295	0.115736	0.0342798	0.117767	0.0320286	0.0994293	0.511436	0	0.527325	0.58834	0.380434	0.770509	0.98565	0.981496
4	4.06667e-08	5.16532e-08	0	5.05379e-08
5	4.10208e-08	5.21063e-08	0	5.09889e-08			Number of sink samples	108				Cross-correlation	0.895617	0.938714	0.218096	0.901111	0.947965	0.191307	0.831311	0.532118	0.870304	0.795485	0.555108	0.758725	0.901252	0.582173	0.820067	0.733876	0.826382	0.86874	0.903881	0.893711	0.890622	0.856465	0.869086	0.860713	0.926181	0.924225	0.961648	0.784388	0.889255	0.86005	0.441719	0.871079	0.819624	0.737456	0.754442	0.767523	0.712458
6	4.14461e-08	5.26504e-08	0	5.15307e-08			Mean Cross-correlation of sink samples	0.372				Likeness	0.781965	0.870231	0.492032	0.812667	0.869466	0.459056	0.777249	0.601344	0.825886	0.697109	0.570811	0.640144	0.857021	0.757943	0.827885	0.777294	0.737653	0.802522	0.819019	0.791283	0.800504	0.793312	0.854768	0.813052	0.864804	0.848005	0.897309	0.703354	0.836197	0.774492	0.329153	0.797548	0.645337	0.789421	0.693427	0.613165	0.481225
7	4.19428e-08	5.32859e-08	0	5.21636e-08			Range Cross-correlation of sink samples	0.963				Kuiper V Value	0.185502	0.0846981	0.498616	0.167237	0.0792169	0.520033	0.135326	0.221424	0.0805203	0.269303	0.276709	0.249122	0.0857677	0.175989	0.113983	0.128567	0.253329	0.131859	0.0982338	0.131307	0.0982758	0.150141	0.106818	0.149805	0.0612977	0.0776954	0.0600061	0.183588	0.122948	0.203232	0.634657	0.17013	0.255471	0.1737	0.226943	0.317941	0.486718
8	4.2511e-08	5.40129e-08	0	5.28878e-08			Mean Kuiper V value of sink samples	0.408				KS D Value	0.129231	0.0551407	0.495326	0.113698	0.0758498	0.501929	0.0926927	0.1283	0.0804297	0.189281	0.219054	0.243643	0.0775905	0.132705	0.0891776	0.113792	0.153555	0.0972228	0.0827218	0.110873	0.059852	0.147996	0.103786	0.1311	0.0386242	0.0689132	0.0362067	0.179312	0.0760857	0.123375	0.349248	0.109644	0.252737	0.0990505	0.223766	0.262691	0.332257
9	4.31509e-08	5.48318e-08	0	5.37039e-08			Range Kuiper V value of sink samples	0.961
10	4.38628e-08	5.5743e-08	0	5.46122e-08			Final Residual	0.219208
11	4.46471e-08	5.67468e-08	0	5.56133e-08			Number of Iterations	200
12	4.55039e-08	5.78437e-08	0	5.67077e-08
13	4.64337e-08	5.90341e-08	0	5.7896e-08
14	4.74368e-08	6.03185e-08	0	5.91787e-08
15	4.85135e-08	6.16974e-08	0	6.05567e-08
16	4.96642e-08	6.31714e-08	0	6.20305e-08
17	5.08894e-08	6.4741e-08	0	6.3601e-08
18	5.21895e-08	6.64069e-08	0	6.5269e-08
19	5.35649e-08	6.81697e-08	0	6.70352e-08
20	5.50161e-08	7.003e-08	0	6.89006e-08
21	5.65435e-08	7.19885e-08	0	7.08661e-08
22	5.81477e-08	7.40458e-08	0	7.29326e-08
23	5.9829e-08	7.62028e-08	0	7.5101e-08
24	6.15881e-08	7.84601e-08	0	7.73725e-08
25	6.34254e-08	8.08184e-08	0	7.97479e-08
26	6.53414e-08	8.32784e-08	0	8.22285e-08
27	6.73367e-08	8.5841e-08	0	8.48152e-08
28	6.94117e-08	8.85069e-08	0	8.75092e-08
29	7.15669e-08	9.12768e-08	0	9.03117e-08
30	7.38028e-08	9.41515e-08	0	9.32238e-08
31	7.612e-08	9.71317e-08	0	9.62466e-08
32	7.85189e-08	1.00218e-07	0	9.93815e-08
33	8.1e-08	1.03412e-07	0	1.0263e-07
34	8.35637e-08	1.06713e-07	0	1.05992e-07
35	8.62105e-08	1.10123e-07	0	1.0947e-07
36	8.89409e-08	1.13642e-07	0	1.13065e-07
37	9.17551e-08	1.17271e-07	0	1.16779e-07
38	9.46537e-08	1.21011e-07	0	1.20611e-07
39	9.7637e-08	1.24862e-07	0	1.24565e-07
40	1.00705e-07	1.28824e-07	0	1.28641e-07
41	1.03859e-07	1.32899e-07	0	1.3284e-07
42	1.07098e-07	1.37087e-07	0	1.37164e-07
43	1.10425e-07	1.41392e-07	0	1.41616e-07
44	1.13838e-07	1.4581e-07	0	1.46196e-07
45	1.17337e-07	1.50343e-07	0	1.50905e-07
46	1.20922e-07	1.54991e-07	0	1.55744e-07
47	1.24595e-07	1.59754e-07	0	1.60714e-07
48	1.28353e-07	1.64634e-07	0	1.65817e-07
49	1.32198e-07	1.69629e-07	0	1.71054e-07
50	1.3613e-07	1.74741e-07	0	1.76426e-07
51	1.40148e-07	1.79969e-07	0	1.81935e-07
52	1.44252e-07	1.85314e-07	0	1.87581e-07
53	1.48442e-07	1.90776e-07	0	1.93368e-07
54	1.52718e-07	1.96355e-07	0	1.99294e-07
55	1.5708e-07	2.02051e-07	0	2.05363e-07
56	1.61527e-07	2.07863e-07	0	2.11576e-07
57	1.66059e-07	2.13793e-07	0	2.17933e-07
58	1.70675e-07	2.1984e-07	0	2.24436e-07
59	1.75375e-07	2.26003e-07	0	2.31087e-07
60	1.80158e-07	2.32282e-07	0	2.37886e-07
61	1.85025e-07	2.38678e-07	0	2.44837e-07
62	1.89973e-07	2.45189e-07	0	2.51939e-07
63	1.95003e-07	2.51815e-07	0	2.59195e-07
64	2.00113e-07	2.58557e-07	0	2.66606e-07
65	2.05304e-07	2.65413e-07	0	2.74174e-07
66	2.10573e-07	2.72383e-07	0	2.81901e-07
67	2.15921e-07	2.79467e-07	0	2.89788e-07
68	2.21345e-07	2.86663e-07	0	2.97838e-07
69	2.26846e-07	2.93971e-07	0	3.06052e-07
70	2.32422e-07	3.01391e-07	0	3.14432e-07
71	2.38072e-07	3.08922e-07	0	3.22982e-07
72	2.43796e-07	3.16563e-07	0	3.31702e-07
73	2.49591e-07	3.24313e-07	0	3.40597e-07
74	2.55457e-07	3.32172e-07	0	3.49667e-07
75	2.61392e-07	3.40139e-07	0	3.58918e-07
76	2.67396e-07	3.48212e-07	0	3.68351e-07
77	2.73467e-07	3.56392e-07	0	3.77971e-07
78	2.79603e-07	3.64678e-07	0	3.87781e-07
79	2.85805e-07	3.73068e-07	0	3.97785e-07
80	2.9207e-07	3.81562e-07	0	4.07987e-07
81	2.98398e-07	3.9016e-07	0	4.18393e-07
82	3.04786e-07	3.9886e-07	0	4.29008e-07
83	3.11235e-07	4.07663e-07	0	4.39837e-07
84	3.17743e-07	4.16566e-07	0	4.50886e-07
85	3.24309e-07	4.25573e-07	0	4.62167e-07
86	3.30933e-07	4.34681e-07	0	4.73683e-07
87	3.37613e-07	4.43889e-07	0	4.85443e-07
88	3.44347e-07	4.53197e-07	0	4.97454e-07
89	3.51136e-07	4.62605e-07	0	5.09725e-07
90	3.57979e-07	4.72113e-07	0	5.22268e-07
91	3.64874e-07	4.81721e-07	0	5.35092e-07
92	3.71823e-07	4.91429e-07	0	5.4821e-07
93	3.78823e-07	5.01239e-07	0	5.61635e-07
94	3.85876e-07	5.1115e-07	0	5.7538e-07
95	3.92982e-07	5.21163e-07	0	5.8946e-07
96	4.00139e-07	5.31281e-07	0	6.03891e-07
97	4.07349e-07	5.41503e-07	0	6.18691e-07
98	4.14613e-07	5.51831e-07	0	6.33877e-07
99	4.21931e-07	5.62268e-07	0	6.4947e-07
100	4.29304e-07	5.72815e-07	0	6.6549e-07
101	4.36734e-07	5.83475e-07	0	6.8196e-07
102	4.44222e-07	5.9425e-07	0	6.98903e-07
103	4.51769e-07	6.05143e-07	0	7.16346e-07
104	4.59378e-07	6.16158e-07	0	7.34315e-07
105	4.67052e-07	6.27298e-07	0	7.52838e-07
106	4.74793e-07	6.38567e-07	0	7.71946e-07
107	4.82603e-07	6.4997e-07	0	7.91669e-07
108	4.90487e-07	6.61512e-07	0	8.12043e-07
109	4.98448e-07	6.73197e-07	0	8.331e-07
110	5.06489e-07	6.85032e-07	0	8.54879e-07
111	5.14616e-07	6.97022e-07	0	8.77416e-07
112	5.22833e-07	7.09174e-07	0	9.00753e-07
113	5.31146e-07	7.21495e-07	0	9.24929e-07
114	5.39559e-07	7.33992e-07	0	9.49989e-07
115	5.48079e-07	7.46673e-07	0	9.75977e-07
116	5.56711e-07	7.59546e-07	0	1.00294e-06
117	5.65463e-07	7.72621e-07	0	1.03092e-06
118	5.74342e-07	7.85906e-07	0	1.05997e-06
119	5.83354e-07	7.99412e-07	0	1.09013e-06
120	5.92508e-07	8.13148e-07	0	1.12146e-06
121	6.01812e-07	8.27125e-07	0	1.15401e-06
122	6.11274e-07	8.41355e-07	0	1.18783e-06
123	6.20903e-07	8.55849e-07	0	1.22297e-06
124	6.30708e-07	8.7062e-07	0	1.25948e-06
125	6.40699e-07	8.85679e-07	0	1.29742e-06
126	6.50885e-07	9.01041e-07	0	1.33683e-06
127	6.6128e-07	9.16723e-07	0	1.37779e-06
128	6.71892e-07	9.32738e-07	0	1.42034e-06
129	6.82732e-07	9.49097e-07	0	1.46451e-06
130	6.93809e-07	9.65816e-07	0	1.51036e-06
131	7.05134e-07	9.82909e-07	0	1.55793e-06
132	7.16719e-07	1.00039e-06	0	1.60725e-06
133	7.28575e-07	1.01828e-06	0	1.65838e-06
134	7.40713e-07	1.0366e-06	0	1.71135e-06
135	7.53145e-07	1.05535e-06	0	1.7662e-06
136	7.65883e-07	1.07456e-06	0	1.82295e-06
137	7.78938e-07	1.09424e-06	0	1.88164e-06
138	7.92322e-07	1.11442e-06	0	1.94229e-06
139	8.06047e-07	1.1351e-06	0	2.00491e-06
140	8.20124e-07	1.15632e-06	0	2.06953e-06
141	8.34565e-07	1.17808e-06	0	2.13615e-06
142	8.49382e-07	1.20041e-06	0	2.20478e-06
143	8.64587e-07	1.22332e-06	0	2.27542e-06
144	8.80191e-07	1.24684e-06	0	2.34807e-06
145	8.96206e-07	1.27098e-06	0	2.42271e-06
146	9.12642e-07	1.29577e-06	0	2.49933e-06
147	9.29513e-07	1.32123e-06	0	2.5779e-06
148	9.46829e-07	1.34737e-06	0	2.6584e-06
149	9.64601e-07	1.37422e-06	0	2.74079e-06
150	9.82841e-07	1.40181e-06	0	2.82503e-06
151	1.00156e-06	1.43014e-06	0	2.91109e-06
152	1.02077e-06	1.45926e-06	0	2.9989e-06
153	1.04049e-06	1.48918e-06	0	3.08842e-06
154	1.06071e-06	1.51992e-06	0	3.17958e-06
155	1.08147e-06	1.55152e-06	0	3.27232e-06
156	1.10276e-06	1.58399e-06	0	3.36656e-06
157	1.12461e-06	1.61737e-06	0	3.46225e-06
158	1.14702e-06	1.65168e-06	0	3.55929e-06
159	1.17e-06	1.68695e-06	0	3.65761e-06
160	1.19358e-06	1.72322e-06	0	3.75713e-06
161	1.21777e-06	1.76051e-06	0	3.85776e-06
162	1.24257e-06	1.79886e-06	0	3.95943e-06
163	1.26802e-06	1.8383e-06	0	4.06204e-06
164	1.29411e-06	1.87887e-06	0	4.1655e-06
165	1.32088e-06	1.92061e-06	0	4.26975e-06
166	1.34834e-06	1.96356e-06	0	4.37469e-06
167	1.37652e-06	2.00776e-06	0	4.48024e-06
168	1.40542e-06	2.05326e-06	0	4.58633e-06
169	1.43509e-06	2.10012e-06	0	4.69289e-06
170	1.46555e-06	2.14839e-06	0	4.79986e-06
171	1.49682e-06	2.1981e-06	0	4.90716e-06
172	1.52892e-06	2.24932e-06	0	5.01474e-06
173	1.56189e-06	2.30211e-06	0	5.12255e-06
174	1.59575e-06	2.35652e-06	0	5.23055e-06
175	1.63055e-06	2.41262e-06	0	5.33873e-06
176	1.66631e-06	2.47048e-06	0	5.44705e-06
177	1.70307e-06	2.53017e-06	0	5.55552e-06
178	1.74087e-06	2.59176e-06	0	5.66416e-06
179	1.77975e-06	2.65533e-06	0	5.77302e-06
180	1.81976e-06	2.72094e-06	0	5.8822e-06
181	1.86093e-06	2.78865e-06	0	5.99185e-06
182	1.90329e-06	2.8585e-06	0	6.10227e-06
183	1.94688e-06	2.93051e-06	0	6.21388e-06
184	1.99172e-06	3.00463e-06	0	6.32742e-06
185	2.03779e-06	3.08073e-06	0	6.44398e-06
186	2.08506e-06	3.15857e-06	0	6.56523e-06
187	2.13344e-06	3.23772e-06	0	6.69367e-06
188	2.18279e-06	3.3175e-06	0	6.83288e-06
189	2.23285e-06	3.39692e-06	0	6.98788e-06
190	2.2833e-06	3.47456e-06	0	7.16551e-06
191	2.33364e-06	3.54854e-06	0	7.37472e-06
192	2.38324e-06	3.61643e-06	0	7.62685e-06
193	2.43135e-06	3.67524e-06	0	7.93566e-06
194	2.47705e-06	3.72151e-06	0	8.31708e-06
195	2.51935e-06	3.75141e-06	0	8.7886e-06
196	2.55725e-06	3.76108e-06	0	9.36805e-06
197	2.58985e-06	3.74696e-06	0	1.0072e-05
198	2.61649e-06	3.70631e-06	0	1.09136e-05
199	2.63691e-06	3.63782e-06	0	1.19e-05
200	2.65143e-06	3.54222e-06	0	1.30299e-05
201	2.66109e-06	3.42275e-06	0	1.4291e-05
202	2.66779e-06	3.28565e-06	0	1.56587e-05
203	2.67428e-06	3.1402e-06	0	1.70953e-05
204	2.68414e-06	2.99857e-06	0	1.85512e-05
205	2.70162e-06	2.87518e-06	0	1.99669e-05
206	2.73137e-06	2.78582e-06	0	2.12777e-05
207	2.77809e-06	2.7464e-06	0	2.24185e-05
208	2.84618e-06	2.77158e-06	0	2.33298e-05
209	2.93938e-06	2.8734e-06	0	2.39637e-05
210	3.0604e-06	3.06015e-06	0	2.42886e-05
211	3.21106e-06	3.33655e-06	0	2.42895e-05
212	3.39156e-06	3.70141e-06	0	2.39761e-05
213	3.60045e-06	4.14775e-06	0	2.33829e-05
214	3.83562e-06	4.66583e-06	0	2.25568e-05
215	4.09427e-06	5.2433e-06	0	2.15565e-05
216	4.37327e-06	5.86651e-06	0	2.04463e-05
217	4.66953e-06	6.52189e-06	0	1.92905e-05
218	4.98036e-06	7.19717e-06	0	1.81479e-05
219	5.30368e-06	7.88233e-06	0	1.70679e-05
220	5.6382e-06	8.57013e-06	0	1.60878e-05
221	5.98342e-06	9.25635e-06	0	1.52319e-05
222	6.33963e-06	9.93964e-06	0	1.45123e-05
223	6.70775e-06	1.06211e-05	0	1.393e-05
224	7.08912e-06	1.13036e-05	0	1.34778e-05
225	7.48538e-06	1.19915e-05	0	1.31423e-05
226	7.89821e-06	1.26895e-05	0	1.29073e-05
227	8.3292e-06	1.34025e-05	0	1.27553e-05
228	8.77968e-06	1.41351e-05	0	1.26694e-05
229	9.25064e-06	1.48909e-05	0	1.26353e-05
230	9.74264e-06	1.56729e-05	0	1.26411e-05
231	1.02558e-05	1.64828e-05	0	1.26787e-05
232	1.07896e-05	1.73213e-05	0	1.27435e-05
233	1.13432e-05	1.81878e-05	0	1.28348e-05
234	1.19152e-05	1.90807e-05	0	1.29557e-05
235	1.25037e-05	1.99971e-05	0	1.3113e-05
236	1.31062e-05	2.09331e-05	0	1.33174e-05
237	1.372e-05	2.18838e-05	0	1.35827e-05
238	1.43418e-05	2.28434e-05	0	1.39257e-05
239	1.49684e-05	2.38055e-05	0	1.43653e-05
240	1.55962e-05	2.47634e-05	0	1.49209e-05
241	1.62216e-05	2.57109e-05	0	1.56107e-05
242	1.68414e-05	2.66423e-05	0	1.64496e-05
243	1.74528e-05	2.75536e-05	0	1.74464e-05
244	1.80537e-05	2.84428e-05	0	1.86011e-05
245	1.8643e-05	2.93108e-05	0	1.99028e-05
246	1.92204e-05	3.01617e-05	0	2.13278e-05
247	1.9787e-05	3.10029e-05	0	2.28391e-05
248	2.03448e-05	3.1845e-05	0	2.43876e-05
249	2.08968e-05	3.27012e-05	0	2.59145e-05
250	2.14468e-05	3.35864e-05	0	2.73553e-05
251	2.1999e-05	3.4516e-05	0	2.86451e-05
252	2.25574e-05	3.55045e-05	0	2.97247e-05
253	2.31258e-05	3.65644e-05	0	3.0544e-05
254	2.37074e-05	3.77052e-05	0	3.10696e-05
255	2.4304e-05	3.89298e-05	0	3.12948e-05
256	2.49163e-05	4.02375e-05	0	3.12301e-05
257	2.55442e-05	4.16236e-05	0	3.09058e-05
258	2.61865e-05	4.30793e-05	0	3.03681e-05
259	2.68416e-05	4.45936e-05	0	2.96747e-05
260	2.75073e-05	4.61542e-05	0	2.88888e-05
261	2.81817e-05	4.77489e-05	0	2.80731e-05
262	2.88634e-05	4.93667e-05	0	2.7285e-05
263	2.95511e-05	5.09989e-05	0	2.65719e-05
264	3.02448e-05	5.26394e-05	0	2.59696e-05
265	3.09449e-05	5.4285e-05	0	2.55007e-05
266	3.16525e-05	5.59354e-05	0	2.51756e-05
267	3.23696e-05	5.75925e-05	0	2.49938e-05
268	3.30985e-05	5.92601e-05	0	2.49466e-05
269	3.38417e-05	6.09433e-05	0	2.50193e-05
270	3.46022e-05	6.26478e-05	0	2.5194e-05
271	3.53826e-05	6.43795e-05	0	2.54514e-05
272	3.6186e-05	6.61443e-05	0	2.5773e-05
273	3.70149e-05	6.79473e-05	0	2.61414e-05
274	3.78721e-05	6.97934e-05	0	2.6542e-05
275	3.87598e-05	7.16866e-05	0	2.69624e-05
276	3.96806e-05	7.36305e-05	0	2.73928e-05
277	4.06365e-05	7.56279e-05	0	2.7826e-05
278	4.16296e-05	7.76811e-05	0	2.82569e-05
279	4.2662e-05	7.9792e-05	0	2.86825e-05
280	4.37352e-05	8.19619e-05	0	2.91017e-05
281	4.4851e-05	8.41913e-05	0	2.95159e-05
282	4.60106e-05	8.64803e-05	0	2.99281e-05
283	4.72152e-05	8.88283e-05	0	3.03443e-05
284	4.84654e-05	9.12338e-05	0	3.07727e-05
285	4.97616e-05	9.36945e-05	0	3.12246e-05
286	5.11037e-05	9.62072e-05	0	3.17139e-05
287	5.24911e-05	9.87681e-05	0	3.22571e-05
288	5.39229e-05	0.000101372	0	3.28722e-05
289	5.53979e-05	0.000104015	0	3.35778e-05
290	5.69143e-05	0.000106692	0	3.43913e-05
291	5.84706e-05	0.000109398	0	3.53263e-05
292	6.00651e-05	0.00011213	0	3.63903e-05
293	6.16964e-05	0.000114888	0	3.75822e-05
294	6.33636e-05	0.000117673	0	3.88899e-05
295	6.50662e-05	0.000120488	0	4.02891e-05
296	6.68049e-05	0.000123343	0	4.17415e-05
297	6.85795e-05	0.000126246	0	4.3196e-05
298	7.03912e-05	0.000129209	0	4.45947e-05
299	7.22409e-05	0.000132246	0	4.58757e-05
300	7.41296e-05	0.00013537	0	4.69786e-05
301	7.60574e-05	0.000138591	0	4.7851e-05
302	7.80238e-05	0.000141918	0	4.84538e-05
303	8.00268e-05	0.000145357	0	4.87661e-05
304	8.20632e-05	0.000148905	0	4.87879e-05
305	8.41284e-05	0.000152558	0	4.85409e-05
306	8.62164e-05	0.000156307	0	4.80668e-05
307	8.83203e-05	0.000160138	0	4.74238e-05
308	9.04323e-05	0.000164036	0	4.66806e-05
309	9.25445e-05	0.000167983	0	4.59112e-05
310	9.46487e-05	0.000171964	0	4.51875e-05
311	9.67377e-05	0.000175963	0	4.45745e-05
312	9.88045e-05	0.000179967	0	4.41251e-05
313	0.000100843	0.000183969	0	4.38775e-05
314	0.000102849	0.000187963	0	4.38537e-05
315	0.000104807	0.000191943	1.27768e-07	4.40392e-05
316	0.000106443	0.000195828	3.3407e-06	4.39579e-05
317	0.000108029	0.000199705	6.6406e-06	4.40627e-05
318	0.000109569	0.000203582	9.97597e-06	4.43315e-05
319	0.000111068	0.000207466	1.32852e-05	4.47376e-05
320	0.000112531	0.000211369	1.64981e-05	4.52531e-05
321	0.000113966	0.000215298	1.95391e-05	4.58503e-05
322	0.00011538	0.000219264	2.23312e-05	4.65043e-05
323	0.00011678	0.000223274	2.48013e-05	4.71925e-05
324	0.000118172	0.000227337	2.68858e-05	4.78957e-05
325	0.000119562	0.000231458	2.85363e-05	4.85957e-05
326	0.000120953	0.000235644	2.9724e-05	4.92749e-05
327	0.000122347	0.000239899	3.04437e-05	4.99135e-05
328	0.000123746	0.000244228	3.07152e-05	5.04882e-05
329	0.000125147	0.000248636	3.05833e-05	5.09708e-05
330	0.000126549	0.000253128	3.01144e-05	5.13278e-05
331	0.000127948	0.000257711	2.93921e-05	5.15213e-05
332	0.00012934	0.00026239	2.85103e-05	5.15113e-05
333	0.00013072	0.000267173	2.75651e-05	5.12588e-05
334	0.000132085	0.000272064	2.66466e-05	5.07298e-05
335	0.000133431	0.00027707	2.58312e-05	4.99e-05
336	0.000134756	0.000282195	2.51747e-05	4.8758e-05
337	0.000136057	0.00028744	2.47089e-05	4.73078e-05
338	0.000137335	0.000292808	2.44404e-05	4.55675e-05
339	0.000138588	0.000298293	2.43423e-05	4.35824e-05
340	0.000139817	0.000303892	2.43692e-05	4.1405e-05
341	0.000141022	0.000309599	2.4459e-05	3.90969e-05
342	0.000142202	0.000315408	2.45395e-05	3.67236e-05
343	0.000143357	0.000321313	2.45359e-05	3.43486e-05
344	0.000144484	0.000327307	2.43775e-05	3.20277e-05
345	0.00014558	0.000333385	2.4003e-05	2.98044e-05
346	0.000146641	0.000339545	2.33649e-05	2.77063e-05
347	0.000147662	0.000345785	2.24315e-05	2.57428e-05
348	0.000148638	0.000352102	2.11873e-05	2.39054e-05
349	0.000149562	0.000358499	1.96317e-05	2.21686e-05
350	0.000150428	0.000364978	1.77775e-05	2.04932e-05
351	0.000151229	0.00037154	1.56475e-05	1.88309e-05
352	0.00015196	0.000378188	1.32719e-05	1.71293e-05
353	0.000152613	0.000384925	1.06859e-05	1.53384e-05
354	0.00015318	0.000391754	7.92708e-06	1.34157e-05
355	0.000153652	0.000398674	5.03418e-06	1.13314e-05
356	0.000154021	0.000405685	2.04542e-06	9.07183e-06
357	0.000154184	0.000412759	0	6.48256e-06
358	0.000154034	0.000419863	0	3.41608e-06
359	0.000153751	0.000427054	0	2.36882e-07
360	0.000153135	0.00043363	0	0
361	0.000152361	0.000440235	0	0
362	0.000151445	0.000446939	0	0
363	0.000150393	0.000453757	0	0
364	0.000149213	0.000460705	0	0
365	0.000147916	0.0004678	0	0
366	0.000146517	0.000475057	0	0
367	0.000145034	0.000482491	0	0
368	0.000143489	0.000490118	0	0
369	0.000141904	0.00049795	0	0
370	0.000140306	0.000506003	0	0
371	0.00013872	0.00051429	0	0
372	0.000137177	0.000522825	0	0
373	0.000135704	0.000531622	0	0
374	0.00013433	0.000540693	0	0
375	0.000133083	0.000550052	0	0
376	0.000131993	0.000559712	0	0
377	0.000131085	0.000569686	0	0
378	0.000130387	0.000579985	0	0
379	0.000129923	0.000590621	0	0
380	0.000129723	0.00060161	0	0
381	0.000129802	0.000612955	0	0
382	0.000130181	0.000624661	0	0
383	0.000130878	0.000636734	0	0
384	0.000131908	0.000649176	0	0
385	0.000133285	0.000661989	0	0
386	0.000135019	0.000675171	0	0
387	0.000137119	0.000688716	0	0
388	0.000139589	0.000702616	0	0
389	0.000142433	0.000716861	0	0
390	0.000145646	0.000731436	0	0
391	0.000149225	0.000746321	0	0
392	0.000153158	0.000761494	0	0
393	0.000157431	0.000776929	0	0
394	0.000162023	0.000792594	0	0
395	0.00016691	0.000808454	0	0
396	0.000172061	0.000824469	0	0
397	0.000177439	0.000840594	0	0
398	0.000183004	0.000856783	0	0
399	0.000188707	0.000872983	0	0
400	0.000194498	0.000889138	0	0
401	0.000200321	0.00090519	0	0
402	0.000206114	0.000921078	0	0
403	0.000211815	0.000936737	0	0
404	0.00021736	0.000952103	0	0
405	0.000222278	0.000966853	3.96941e-06	0
406	0.000227021	0.000981251	6.82284e-06	0
407	0.000231675	0.000995325	7.09397e-06	0
408	0.000236152	0.001009	5.04452e-06	0
409	0.000240344	0.00102217	1.1711e-06	0
410	0.000243737	0.0010345	0	0
411	0.000246442	0.00104602	0	0
412	0.000248541	0.00105677	0	0
413	0.000250014	0.00106669	0	0
414	0.000250884	0.00107576	0	0
415	0.000251307	0.00108393	0	0
416	0.000251821	0.00109118	0	0
417	0.000253864	0.00109746	0	0
418	0.000260583	0.00110272	0	0
419	0.000277457	0.00110686	0	0
420	0.000311559	0.00110978	0	0
421	0.000368101	0.00111142	0	0
422	0.000444667	0.0011118	0	0
423	0.000525195	0.00111123	0	0
424	0.00058467	0.00111011	0	0
425	0.000600147	0.00110883	0	0
426	0.000563802	0.00110756	0	0
427	0.00048739	0.00110598	2.64916e-06	0
428	0.000395172	0.00110363	9.68344e-06	0
429	0.000311093	0.00110053	1.61577e-05	0
430	0.000248127	0.00109654	2.1536e-05	0
431	0.000207812	0.0010917	2.56608e-05	0
432	0.000185498	0.00108613	2.85806e-05	0
433	0.0001765	0.00107993	3.03498e-05	0
434	0.000179831	0.0010728	3.01486e-05	1.77412e-06
435	0.000198872	0.00106443	2.71482e-05	6.81966e-06
436	0.000238967	0.00105565	2.29241e-05	1.09384e-05
437	0.000301903	0.0010465	1.74171e-05	1.40914e-05
438	0.000379988	0.00103708	1.0904e-05	1.62787e-05
439	0.000453984	0.00102769	4.06619e-06	1.75435e-05
440	0.000498861	0.0010186	0	1.76059e-05
441	0.000496512	0.00101003	0	1.64318e-05
442	0.000446592	0.00100212	0	1.47145e-05
443	0.000366087	0.000994637	0	1.23827e-05
444	0.000279682	0.000987253	0	9.32541e-06
445	0.000207225	0.000979685	0	5.49268e-06
446	0.000157122	0.000971804	0	9.47732e-07
447	0.000127433	0.000962642	0	0
448	0.000112008	0.000952926	0	0
449	0.000104618	0.000942984	0	0
450	0.000101037	0.000932887	0	0
451	9.90615e-05	0.000922673	0	0
452	9.77589e-05	0.000912359	0	0
453	9.67948e-05	0.000901953	0	0
454	9.60653e-05	0.000891453	0	0
455	9.55468e-05	0.000880861	0	0
456	9.52706e-05	0.000870174	0	0
457	9.53983e-05	0.00085939	0	0
458	9.64622e-05	0.000848501	0	0
459	9.98878e-05	0.00083749	0	0
460	0.000108797	0.000826312	0	0
461	0.000128637	0.000814894	0	0
462	0.00016644	0.000803136	0	0
463	0.000227382	0.000790973	0	0
464	0.000309015	0.000778457	0	0
465	0.000395325	0.000765854	0	0
466	0.000461189	0.000753569	0	0
467	0.000483573	0.000741975	0	0
468	0.000454565	0.00073121	0	0
469	0.000386172	0.000721103	0	0
470	0.000303038	0.000711286	0	0
471	0.00022934	0.000701395	0	0
472	0.000179841	0.000691213	0	0
473	0.000159645	0.00068067	0	0
474	0.000169318	0.000669765	0	0
475	0.00020873	0.000658508	0	0
476	0.000275679	0.000646939	0	0
477	0.000360814	0.00063521	0	0
478	0.000444815	0.000623626	0	0
479	0.000503455	0.00061257	0	0
480	0.00051996	0.000602306	0	0
481	0.000496553	0.000592807	0	0
482	0.000455611	0.000583732	0	0
483	0.000428011	0.000574609	0	0
484	0.000435645	0.000565107	0	0
485	0.000478909	0.000555224	0	0
486	0.000536572	0.000545298	0	0
487	0.000578205	0.000535805	0	0
488	0.000582111	0.000527089	0	0
489	0.000548016	0.000519162	0	0
490	0.000495777	0.000510948	1.1692e-05	0
491	0.00045702	0.000502668	2.44847e-05	0
492	0.000456303	0.00049402	3.73207e-05	0
493	0.000500663	0.0004849	5.02496e-05	0
494	0.000576517	0.000475475	6.4088e-05	0
495	0.00065543	0.0004661	8.02237e-05	0
496	0.000707109	0.000456199	9.81858e-05	4.63736e-06
497	0.000714719	0.000446811	0.000120872	9.80814e-06
498	0.000683089	0.000437849	0.000148777	1.54616e-05
499	0.000635576	0.000428967	0.000181811	2.16014e-05
500	0.000602788	0.000419718	0.00021969	2.82199e-05
501	0.000612666	0.00040969	0.000262226	3.53233e-05
502	0.000687589	0.000398542	0.000309373	4.2933e-05
503	0.000845282	0.000386	0.000361128	5.10754e-05
504	0.00109579	0.000371904	0.000417547	5.97791e-05
505	0.00143182	0.000356339	0.000478972	6.90906e-05
506	0.00181991	0.000339747	0.000546362	7.91014e-05
507	0.00220347	0.000322911	0.0006208	8.9894e-05
508	0.00253282	0.000306562	0.000702788	0.000101487
509	0.00279602	0.000290982	0.000791282	0.000113756
510	0.00303404	0.000275809	0.000883242	0.000126394
511	0.00332621	0.000260205	0.000974213	0.000138966
512	0.00375374	0.000243317	0.00105962	0.000151025
513	0.00436487	0.000224701	0.00113603	0.000162218
514	0.00516248	0.000204474	0.00120159	0.000172329
515	0.00612081	0.000183102	0.00125554	0.000181235
516	0.00722324	0.000160923	0.00129699	0.000188802
517	0.0085007	0.000137657	0.00132359	0.000194768
518	0.0100419	0.000112291	0.00133118	0.000198708
519	0.0119552	8.35609e-05	0.00131496	0.000200136
520	0.0142963	5.08745e-05	0.00127185	0.000198695
521	0.0170107	1.50355e-05	0.00120238	0.000194328
522	0.019933	0	0.00110374	0.000168949
523	0.0228851	0	0.000983452	0.000129712
524	0.0257587	0	0.000849764	9.0656e-05
525	0.0285464	0	0.000702929	5.18288e-05
526	0.0313114	0	0.000541184	1.23619e-05
527	0.0341087	0	0.00034668	0
528	0.0369231	0	0.00013083	0
529	0.0396116	0	0	0
530	0.0419257	0	0	0
531	0.0435856	0	0	0
532	0.0443346	0	0	0
533	0.0440432	0	0	0
534	0.0427208	0	0	0
535	0.0404615	0	0	0
536	0.0373966	0	0	0
537	0.033707	0	0	0
538	0.0296585	0	0	0
539	0.0255675	3.06876e-05	0	0
540	0.0217551	9.09835e-05	0	0
541	0.0184561	0.000143312	0	0
542	0.0157337	0.000186699	0	0
543	0.013523	0.000222154	0	0
544	0.011685	0.000251835	0	0
545	0.010066	0.000278129	0	0
546	0.00854711	0.000302883	0	0
547	0.00707861	0.000326873	0	0
548	0.00569028	0.000349644	0	0
549	0.00446972	0.000369844	0	0
550	0.00351358	0.000385979	0	0
551	0.0028773	0.000397193	0	0
552	0.00253852	0.000403832	0	0
553	0.00239951	0.000407409	0	0
554	0.00233104	0.000409922	0	0
555	0.00223266	0.000412927	0	0
556	0.00207127	0.000416933	0	0
557	0.00187522	0.000421503	0	0
558	0.00169394	0.000425872	0	0
559	0.00155609	0.0004296	0	0
560	0.00145431	0.000432806	0	0
561	0.00136048	0.000435685	0	1.06025e-06
562	0.00125347	0.000438689	0	2.67867e-06
563	0.00113474	0.000441927	0	4.33449e-06
564	0.00102142	0.000445174	0	5.89079e-06
565	0.000926578	0.000448263	0	7.23889e-06
566	0.000846768	0.000451249	0	8.39305e-06
567	0.000767213	0.000454289	1.94625e-06	9.13807e-06
568	0.000677563	0.000457565	4.7392e-06	9.69596e-06
569	0.000581153	0.000461067	7.61178e-06	1.01164e-05
570	0.000491697	0.000464629	1.01548e-05	1.03001e-05
571	0.000423231	0.000468082	1.19482e-05	1.01399e-05
572	0.000383364	0.000471336	1.27782e-05	9.54237e-06
573	0.000373797	0.000474377	1.26177e-05	8.43165e-06
574	0.000394328	0.000477211	1.14948e-05	6.74263e-06
575	0.000444392	0.000479847	9.44245e-06	4.42184e-06
576	0.00051969	0.000482339	6.60841e-06	1.4413e-06
577	0.000606923	0.000484401	2.49027e-06	0
578	0.000682943	0.000486216	0	0
579	0.000722931	0.000488444	0	0
580	0.000713031	0.00049146	0	0
581	0.000658176	0.000495186	0	0
582	0.00057931	0.0004993	0	0
583	0.000501345	0.000503414	0	0
584	0.000441344	0.000507267	0	0
585	0.000404261	0.00051078	0	0
586	0.000386198	0.000514012	0	0
587	0.00038023	0.000517067	0	0
588	0.000380481	0.000520027	0	0
589	0.000383383	0.000522939	0	0
590	0.000387241	0.000525816	0	0
591	0.000391384	0.000528653	0	0
592	0.000395592	0.000531435	0	0
593	0.000399792	0.000534146	0	0
594	0.000403949	0.000536763	0	0
595	0.000408035	0.000539266	0	0
596	0.000412021	0.000541632	0	0
597	0.000415876	0.000543839	0	0
598	0.000419566	0.000545864	0	0
599	0.000423058	0.000547686	0	0
600	0.000426315	0.000549282	0	0
601	0.0004293	0.000550631	0	0
602	0.000431977	0.000551716	0	0
603	0.000434308	0.000552516	0	0
604	0.00043626	0.000553017	0	0
605	0.0004378	0.000553201	0	0
606	0.000438899	0.000553058	0	0
607	0.000439531	0.000552575	0	0
608	0.000439676	0.000551743	0	0
609	0.000439317	0.000550555	0	0
610	0.000438444	0.000549008	0	0
611	0.000437052	0.000547098	0	0
612	0.000435141	0.000544826	0	0
613	0.000432719	0.000542194	0	0
614	0.000429797	0.000539207	0	0
615	0.000426393	0.000535872	0	0
616	0.000422531	0.000532197	0	0
617	0.000418236	0.000528194	0	0
618	0.00041354	0.000523874	0	0
619	0.000408476	0.000519254	0	0
620	0.000403081	0.000514349	0	0
621	0.000397392	0.000509175	0	0
622	0.000391448	0.000503752	0	0
623	0.000385287	0.000498098	0	0
624	0.000378948	0.000492233	0	0
625	0.000372467	0.000486176	0	0
626	0.000365879	0.000479947	0	0
627	0.000359215	0.000473566	0	0
628	0.000352507	0.00046705	0	0
629	0.00034578	0.000460418	0	0
630	0.000339056	0.000453686	0	0
631	0.000332356	0.000446869	0	0
632	0.000325696	0.000439981	0	0
633	0.000319088	0.000433034	0	0
634	0.00031254	0.000426041	0	0
635	0.000306057	0.00041901	0	0
636	0.000299642	0.00041195	0	0
637	0.000293293	0.000404868	0	0
638	0.000287009	0.000397769	0	0
639	0.000280785	0.000390659	0	0
640	0.000274615	0.000383541	0	0
641	0.000268492	0.00037642	0	0
642	0.00026241	0.0003693	0	0
643	0.00025636	0.000362183	0	0
644	0.000250338	0.000355075	0	0
645	0.000244337	0.000347978	0	0
646	0.000238352	0.000340897	0	0
647	0.000232381	0.000333838	0	0
648	0.000226421	0.000326805	0	0
649	0.000220473	0.000319805	0	0
650	0.000214539	0.000312843	0	0
651	0.000208623	0.000305927	0	0
652	0.000202729	0.000299064	0	0
653	0.000196865	0.000292262	0	0
654	0.000191038	0.000285526	0	0
655	0.000185259	0.000278866	0	0
656	0.000179537	0.000272287	0	0
657	0.000173883	0.000265798	0	0
658	0.000168309	0.000259405	0	0
659	0.000162826	0.000253114	0	0
660	0.000157446	0.000246932	0	0
661	0.000152179	0.000240863	0	0
662	0.000147035	0.000234912	0	0
663	0.000142026	0.000229084	0	0
664	0.00013716	0.000223382	0	0
665	0.000132443	0.00021781	0	0
666	0.000127885	0.00021237	0	0
667	0.000123489	0.000207064	0	0
668	0.000119261	0.000201893	0	0
669	0.000115204	0.00019686	0	0
670	0.00011132	0.000191964	0	0
671	0.00010761	0.000187207	0	0
672	0.000104075	0.000182587	0	0
673	0.000100714	0.000178106	0	0
674	9.75264e-05	0.000173762	0	0
675	9.4511e-05	0.000169557	0	0
676	9.16624e-05	0.000165487	0	0
677	8.8977e-05	0.000161552	0	0
678	8.64506e-05	0.000157748	0	0
679	8.4079e-05	0.000154076	0	0
680	8.18572e-05	0.000150533	0	0
681	7.97803e-05	0.000147117	0	0
682	7.7843e-05	0.000143825	0	0
683	7.60398e-05	0.000140657	0	0
684	7.43651e-05	0.000137609	0	0
685	7.2813e-05	0.000134679	0	0
686	7.13776e-05	0.000131863	0	0
687	7.00526e-05	0.00012916	0	0
688	6.88319e-05	0.000126566	0	0
689	6.77088e-05	0.000124078	0	0
690	6.66768e-05	0.000121693	0	0
691	6.5729e-05	0.000119408	0	0
692	6.48586e-05	0.000117218	0	0
693	6.40584e-05	0.000115121	0	0
694	6.33214e-05	0.000113112	0	0
695	6.26405e-05	0.000111188	0	0
696	6.20086e-05	0.000109345	0	0
697	6.14186e-05	0.000107579	0	0
698	6.08636e-05	0.000105888	0	0
699	6.03372e-05	0.000104265	0	0
700	5.9833e-05	0.00010271	0	0
701	5.93452e-05	0.000101217	0	0
702	5.88683e-05	9.97833e-05	0	0
703	5.83975e-05	9.84065e-05	0	0
704	5.79286e-05	9.70834e-05	0	0
705	5.74579e-05	9.58113e-05	0	0
706	5.69825e-05	9.45881e-05	0	0
707	5.65002e-05	9.34114e-05	0	0
708	5.60094e-05	9.22797e-05	0	0
709	5.55092e-05	9.11912e-05	0	0
710	5.49993e-05	9.01447e-05	0	0
711	5.44801e-05	8.9139e-05	0	0
712	5.39524e-05	8.81734e-05	0	0
713	5.34175e-05	8.72469e-05	0	0
714	5.2877e-05	8.63591e-05	0	0
715	5.23327e-05	8.55092e-05	0	0
716	5.17868e-05	8.46971e-05	0	0
717	5.12416e-05	8.39227e-05	0	0
718	5.06523e-05	8.3155e-05	4.60568e-07	0
719	4.99932e-05	8.23757e-05	1.65679e-06	0
720	4.93408e-05	8.16314e-05	2.85845e-06	0
721	4.8698e-05	8.0922e-05	4.05723e-06	0
722	4.80674e-05	8.02472e-05	5.24443e-06	0
723	4.74518e-05	7.96069e-05	6.41108e-06	0
724	4.68537e-05	7.90006e-05	7.54804e-06	0
725	4.62756e-05	7.84282e-05	8.64617e-06	0
726	4.57197e-05	7.78891e-05	9.69644e-06	0
727	4.51885e-05	7.73831e-05	1.06901e-05	0
728	4.4684e-05	7.69097e-05	1.1619e-05	0
729	4.42086e-05	7.64687e-05	1.24753e-05	0
730	4.37645e-05	7.60598e-05	1.32522e-05	0
731	4.33537e-05	7.56828e-05	1.39437e-05	0
732	4.29787e-05	7.53374e-05	1.45449e-05	0
733	4.26415e-05	7.50237e-05	1.50519e-05	0
734	4.23443e-05	7.47417e-05	1.54619e-05	0
735	4.20894e-05	7.44912e-05	1.57737e-05	0
736	4.18786e-05	7.42725e-05	1.59871e-05	0
737	4.17139e-05	7.40855e-05	1.61029e-05	0
738	4.15969e-05	7.39302e-05	1.61235e-05	0
739	4.1529e-05	7.38065e-05	1.6052e-05	0
740	4.15111e-05	7.37143e-05	1.58926e-05	0
741	4.15438e-05	7.36531e-05	1.56504e-05	0
742	4.1627e-05	7.36222e-05	1.53311e-05	0
743	4.17601e-05	7.36208e-05	1.49409e-05	0
744	4.19419e-05	7.36477e-05	1.44865e-05	0
745	4.21704e-05	7.37014e-05	1.39747e-05	0
746	4.24428e-05	7.378e-05	1.34125e-05	0
747	4.27558e-05	7.38812e-05	1.2807e-05	0
748	4.31049e-05	7.40025e-05	1.21649e-05	0
749	4.34854e-05	7.41408e-05	1.14928e-05	0
750	4.38914e-05	7.42929e-05	1.07971e-05	0
751	4.43169e-05	7.44553e-05	1.00838e-05	0
752	4.47551e-05	7.46239e-05	9.35834e-06	0
753	4.51986e-05	7.47949e-05	8.62589e-06	0
754	4.56401e-05	7.49639e-05	7.89113e-06	0
755	4.60718e-05	7.51267e-05	7.15833e-06	0
756	4.6486e-05	7.5279e-05	6.43127e-06	0
757	4.68753e-05	7.54164e-05	5.71335e-06	0
758	4.7232e-05	7.55348e-05	5.00757e-06	0
759	4.75485e-05	7.56296e-05	4.31682e-06	0
760	4.78189e-05	7.56975e-05	3.64304e-06	0
761	4.80377e-05	7.57352e-05	2.98807e-06	0
762	4.81999e-05	7.57394e-05	2.35341e-06	0
763	4.83014e-05	7.57077e-05	1.74029e-06	0
764	4.8339e-05	7.56376e-05	1.14964e-06	0
765	4.83106e-05	7.55276e-05	5.82158e-07	0
766	4.82148e-05	7.53762e-05	3.83192e-08	0
767	4.80025e-05	7.51516e-05	0	0
768	4.77219e-05	7.48837e-05	0	0
769	4.73785e-05	7.45752e-05	0	0
770	4.69749e-05	7.42268e-05	0	0
771	4.65142e-05	7.38396e-05	0	0
772	4.60004e-05	7.34152e-05	0	0
773	4.54379e-05	7.29556e-05	0	0
774	4.48317e-05	7.24632e-05	0	0
775	4.41871e-05	7.19406e-05	0	0
776	4.35096e-05	7.13909e-05	0	0
777	4.28049e-05	7.08173e-05	0	0
778	4.20787e-05	7.02233e-05	0	0
779	4.13367e-05	6.96126e-05	0	0
780	4.05845e-05	6.8989e-05	0	0
781	3.98274e-05	6.83563e-05	0	0
782	3.90704e-05	6.77186e-05	0	0
783	3.83183e-05	6.70797e-05	0	0
784	3.75754e-05	6.64438e-05	0	0
785	3.68457e-05	6.58146e-05	0	0
786	3.61329e-05	6.51959e-05	0	0
787	3.54401e-05	6.45916e-05	0	0
788	3.47702e-05	6.4005e-05	0	0
789	3.41255e-05	6.34397e-05	0	0
790	3.35082e-05	6.28987e-05	0	0
791	3.292e-05	6.2385e-05	0	0
792	3.23623e-05	6.19013e-05	0	0
793	3.18363e-05	6.14501e-05	0	0
794	3.1343e-05	6.10335e-05	0	0
795	3.0883e-05	6.06534e-05	0	0
796	3.04568e-05	6.03115e-05	0	0
797	3.0065e-05	6.0009e-05	0	0
798	2.97076e-05	5.97471e-05	0	0
799	2.93016e-05	5.94734e-05	8.18835e-07	0
800	2.89198e-05	5.92347e-05	1.74103e-06	0
801	2.85685e-05	5.90356e-05	2.71412e-06	0
802	2.82476e-05	5.88757e-05	3.72992e-06	0
803	2.79579e-05	5.8755e-05	4.78056e-06	0
804	2.77e-05	5.86737e-05	5.85731e-06	0
805	2.74748e-05	5.86316e-05	6.95077e-06	0
806	2.72831e-05	5.86284e-05	8.05095e-06	0
807	2.71256e-05	5.86638e-05	9.14751e-06	0
808	2.70028e-05	5.87371e-05	1.02299e-05	0
809	2.69154e-05	5.88477e-05	1.12877e-05	0
810	2.68637e-05	5.89948e-05	1.23105e-05	0
811	2.68478e-05	5.91774e-05	1.32884e-05	0
812	2.68678e-05	5.93944e-05	1.42122e-05	0
813	2.6923e-05	5.96446e-05	1.50732e-05	0
814	2.7013e-05	5.99266e-05	1.58637e-05	0
815	2.71365e-05	6.0239e-05	1.65771e-05	0
816	2.72921e-05	6.05802e-05	1.72077e-05	0
817	2.74779e-05	6.09484e-05	1.77511e-05	0
818	2.76917e-05	6.13418e-05	1.82039e-05	0
819	2.79309e-05	6.17586e-05	1.8564e-05	0
820	2.81924e-05	6.21965e-05	1.88301e-05	0
821	2.84728e-05	6.26537e-05	1.90023e-05	0
822	2.87687e-05	6.31278e-05	1.90812e-05	0
823	2.90761e-05	6.36169e-05	1.90685e-05	0
824	2.93911e-05	6.41187e-05	1.89665e-05	0
825	2.97096e-05	6.46313e-05	1.87781e-05	0
826	3.00274e-05	6.51526e-05	1.85065e-05	0
827	3.03407e-05	6.56808e-05	1.81554e-05	0
828	3.06455e-05	6.62142e-05	1.77286e-05	0
829	3.09383e-05	6.67515e-05	1.72303e-05	0
830	3.12159e-05	6.72915e-05	1.66646e-05	0
831	3.14753e-05	6.78332e-05	1.60357e-05	0
832	3.17142e-05	6.83763e-05	1.53478e-05	0
833	3.19306e-05	6.89205e-05	1.46052e-05	0
834	3.2123e-05	6.94659e-05	1.38124e-05	0
835	3.22907e-05	7.00133e-05	1.29738e-05	0
836	3.24332e-05	7.05635e-05	1.20939e-05	0
837	3.25507e-05	7.11178e-05	1.11776e-05	0
838	3.2644e-05	7.16781e-05	1.02299e-05	0
839	3.27141e-05	7.22463e-05	9.25602e-06	0
840	3.27626e-05	7.28249e-05	8.26155e-06	0
841	3.27913e-05	7.34163e-05	7.25238e-06	0
842	3.28025e-05	7.40235e-05	6.23473e-06	0
843	3.27981e-05	7.465e-05	5.21523e-06	0
844	3.2781e-05	7.52986e-05	4.20094e-06	0
845	3.27537e-05	7.59726e-05	3.19894e-06	0
846	3.27187e-05	7.66753e-05	2.21656e-06	0
847	3.26783e-05	7.741e-05	1.26121e-06	0
848	3.26349e-05	7.81798e-05	3.40386e-07	0
849	3.25356e-05	7.89533e-05	0	0
850	3.24072e-05	7.97493e-05	0	0
851	3.22868e-05	8.05935e-05	0	0
852	3.2176e-05	8.1489e-05	0	0
853	3.20766e-05	8.24389e-05	0	0
854	3.19894e-05	8.34461e-05	0	0
855	3.19154e-05	8.45134e-05	0	0
856	3.18548e-05	8.56432e-05	0	0
857	3.18077e-05	8.68381e-05	0	0
858	3.17738e-05	8.81002e-05	0	0
859	3.17525e-05	8.94316e-05	0	0
860	3.17428e-05	9.08343e-05	0	0
861	3.17438e-05	9.23101e-05	0	0
862	3.17541e-05	9.38608e-05	0	0
863	3.17724e-05	9.5488e-05	0	0
864	3.1797e-05	9.71934e-05	0	0
865	3.18266e-05	9.89785e-05	0	0
866	3.18596e-05	0.000100845	0	0
867	3.18946e-05	0.000102794	0	0
868	3.19303e-05	0.000104827	0	0
869	3.19654e-05	0.000106947	0	0
870	3.19992e-05	0.000109153	0	0
871	3.20308e-05	0.000111448	0	0
872	3.19983e-05	0.000113795	6.03913e-07	0
873	3.19326e-05	0.000116213	1.5066e-06	0
874	3.18616e-05	0.000118724	2.43495e-06	0
875	3.17866e-05	0.000121328	3.38162e-06	0
876	3.1709e-05	0.000124028	4.33966e-06	0
877	3.16304e-05	0.000126824	5.30257e-06	0
878	3.15526e-05	0.00012972	6.26438e-06	0
879	3.14777e-05	0.000132716	7.21962e-06	0
880	3.14076e-05	0.000135813	8.16331e-06	0
881	3.13446e-05	0.000139013	9.09086e-06	0
882	3.12908e-05	0.000142317	9.99801e-06	0
883	3.12482e-05	0.000145723	1.08806e-05	0
884	3.12188e-05	0.000149234	1.17347e-05	0
885	3.12048e-05	0.000152849	1.25552e-05	0
886	3.12077e-05	0.000156568	1.33379e-05	0
887	3.12288e-05	0.000160387	1.4078e-05	0
888	3.12694e-05	0.000164306	1.47701e-05	0
889	3.13302e-05	0.000168323	1.54083e-05	0
890	3.14118e-05	0.000172435	1.59865e-05	0
891	3.15146e-05	0.00017664	1.64984e-05	0
892	3.16383e-05	0.000180934	1.69381e-05	0
893	3.17825e-05	0.000185316	1.73001e-05	0
894	3.19464e-05	0.00018978	1.75805e-05	0
895	3.21286e-05	0.000194325	1.77769e-05	0
896	3.23274e-05	0.000198947	1.78895e-05	0
897	3.25409e-05	0.000203642	1.79214e-05	0
898	3.27664e-05	0.000208408	1.78791e-05	0
899	3.30011e-05	0.000213241	1.77727e-05	0
900	3.3242e-05	0.000218139	1.76156e-05	0
901	3.34857e-05	0.000223101	1.74245e-05	0
902	3.37288e-05	0.000228125	1.72182e-05	0
903	3.39681e-05	0.000233209	1.7016e-05	0
904	3.42007e-05	0.000238356	1.68365e-05	0
905	3.44241e-05	0.000243564	1.66954e-05	0
906	3.46368e-05	0.000248838	1.6603e-05	0
907	3.48381e-05	0.000254181	1.65625e-05	0
908	3.50286e-05	0.000259597	1.6568e-05	0
909	3.52102e-05	0.000265092	1.66033e-05	0
910	3.5386e-05	0.000270675	1.66415e-05	0
911	3.55603e-05	0.000276352	1.66456e-05	0
912	3.57386e-05	0.000282134	1.65702e-05	0
913	3.59269e-05	0.00028803	1.63638e-05	0
914	3.61319e-05	0.000294049	1.59731e-05	0
915	3.63599e-05	0.000300202	1.53464e-05	0
916	3.66167e-05	0.000306497	1.44381e-05	0
917	3.69071e-05	0.000312941	1.3213e-05	0
918	3.72346e-05	0.000319542	1.16494e-05	0
919	3.76008e-05	0.000326303	9.74116e-06	0
920	3.80059e-05	0.000333229	7.49919e-06	0
921	3.84479e-05	0.00034032	4.95039e-06	0
922	3.89237e-05	0.000347576	2.13587e-06	0
923	3.93375e-05	0.000354937	0	0
924	3.95415e-05	0.00036231	0	0
925	3.97534e-05	0.000369833	0	0
926	3.9973e-05	0.000377505	0	0
927	4.02002e-05	0.000385327	0	0
928	4.04341e-05	0.000393296	0	0
929	4.06736e-05	0.000401407	0	0
930	4.09173e-05	0.000409658	0	0
931	4.11637e-05	0.000418046	0	0
932	4.14107e-05	0.000426566	0	0
933	4.16559e-05	0.000435216	0	0
934	4.18969e-05	0.000443992	0	0
935	4.21309e-05	0.00045289	0	0
936	4.23547e-05	0.000461908	0	0
937	4.25652e-05	0.000471042	0	0
938	4.2759e-05	0.000480291	0	0
939	4.29327e-05	0.000489653	0	0
940	4.30828e-05	0.000499127	0	0
941	4.32058e-05	0.000508712	0	0
942	4.32982e-05	0.000518409	0	0
943	4.33565e-05	0.000528219	0	0
944	4.33775e-05	0.000538143	0	0
945	4.33579e-05	0.000548185	0	0
946	4.32945e-05	0.000558348	0	0
947	4.31846e-05	0.000568637	0	0
948	4.30252e-05	0.000579057	0	0
949	4.28137e-05	0.000589614	0	0
950	4.25476e-05	0.000600316	0	0
951	4.22245e-05	0.000611171	0	0
952	4.18423e-05	0.000622187	0	0
953	4.1399e-05	0.000633375	0	0
954	4.08929e-05	0.000644743	0	0
955	4.03227e-05	0.000656303	0	0
956	3.96874e-05	0.000668063	0	0
957	3.8987e-05	0.000680034	0	0
958	3.82219e-05	0.000692224	0	0
959	3.73934e-05	0.000704641	0	0
960	3.65039e-05	0.00071729	0	0
961	3.55566e-05	0.000730177	0	0
962	3.45556e-05	0.000743304	0	0
963	3.35054e-05	0.000756673	0	0
964	3.24111e-05	0.000770283	0	0
965	3.12775e-05	0.000784136	0	0
966	3.0109e-05	0.00079823	0	0
967	2.89093e-05	0.000812567	0	0
968	2.76806e-05	0.000827147	0	0
969	2.64232e-05	0.000841977	0	0
970	2.51365e-05	0.00085706	0	0
971	2.38183e-05	0.0008724	0	0
972	2.24649e-05	0.000888003	0	0
973	2.10713e-05	0.000903877	0	0
974	1.96321e-05	0.000920028	0	0
975	1.81415e-05	0.000936463	0	0
976	1.65935e-05	0.000953187	0	0
977	1.49824e-05	0.000970204	0	0
978	1.33027e-05	0.000987515	0	0
979	1.15493e-05	0.00100512	0	0
980	9.71722e-06	0.00102302	0	0
981	7.80167e-06	0.0010412	0	0
982	5.79764e-06	0.00105967	0	0
983	3.69984e-06	0.00107842	0	0
984	1.50249e-06	0.00109744	0	0
985	0	0.00111671	0	0
986	0	0.00113621	0	0
987	0	0.00115596	0	0
988	0	0.00117594	0	0
989	0	0.00119616	0	0
990	0	0.00121661	0	0
991	0	0.00123727	0	0
992	0	0.00125814	0	0
993	0	0.00127921	0	0
994	0	0.00130047	0	0
995	0	0.00132191	0	0
996	0	0.00134353	0	0
997	0	0.00136529	0	0
998	0	0.0013872	0	0
999	0	0.00140923	0	0
1000	0	0.00143135	0	0
1001	0	0.00145355	0	0
1002	0	0.00147581	0	0
1003	0	0.00149808	0	0
1004	0	0.00152034	0	0
1005	0	0.00154255	0	0
1006	0	0.0015647	0	0
1007	0	0.00158673	0	0
1008	0	0.00160864	0	0
1009	0	0.00163038	0	0
1010	0	0.00165194	0	0
1011	0	0.00167331	0	0
1012	0	0.00169446	0	0
1013	0	0.0017154	0	0
1014	0	0.00173612	0	0
1015	0	0.00175662	0	0
1016	0	0.00177692	0	0
1017	0	0.00179702	0	0
1018	0	0.00181692	0	0
1019	0	0.00183663	0	0
1020	0	0.00185615	0	0
1021	0	0.00187546	0	0
1022	0	0.00189457	0	0
1023	0	0.00191344	0	0
1024	0	0.00193207	0	0
1025	0	0.00195042	0	0
1026	0	0.00196847	0	0
1027	0	0.00198617	0	0
1028	0	0.0020035	0	0
1029	0	0.00202042	0	0
1030	0	0.0020369	0	0
1031	0	0.00205292	0	0
1032	0	0.00206844	0	0
1033	0	0.00208345	0	0
1034	0	0.00209793	0	0
1035	0	0.00211185	0	0
1036	0	0.00212523	0	0
1037	0	0.00213803	0	0
1038	0	0.00215028	0	0
1039	0	0.00216197	0	0
1040	0	0.0021731	0	0
1041	0	0.0021837	0	0
1042	0	0.00219377	0	0
1043	0	0.00220333	0	0
1044	0	0.00221241	0	0
1045	0	0.00222102	0	0
1046	0	0.00222918	0	0
1047	0	0.00223693	0	0
1048	0	0.00224428	0	0
1049	0	0.00225126	0	0
1050	0	0.00225791	0	0
1051	0	0.00226423	0	0
1052	0	0.00227026	0	0
1053	0	0.00227601	0	0
1054	0	0.00228151	0	0
1055	0	0.00228676	0	0
1056	0	0.00229179	0	0
1057	0	0.00229658	0	0
1058	0	0.00230113	0	0
1059	0	0.00230542	0	0
1060	0	0.00230944	0	0
1061	0	0.00231316	0	0
1062	0	0.00231655	0	0
1063	0	0.00231959	0	0
1064	0	0.00232225	0	0
1065	0	0.00232452	0	0
1066	0	0.00232639	0	0
1067	0	0.00232786	0	0
1068	0	0.00232894	0	0
1069	0	0.00232964	0	0
1070	0	0.00232997	0	0
1071	0	0.0023293	9.75086e-06	0
1072	0	0.00232814	2.17202e-05	0
1073	0	0.00232676	3.17389e-05	0
1074	0	0.0023252	3.92253e-05	0
1075	0	0.00232345	4.37934e-05	0
1076	0	0.0023215	4.53088e-05	0
1077	0	0.00231931	4.39056e-05	0
1078	0	0.0023168	3.9962e-05	0
1079	0	0.0023139	3.404e-05	0
1080	0	0.00231051	2.68039e-05	0
1081	0	0.00230655	1.89338e-05	0
1082	0	0.00230193	1.10489e-05	0
1083	0	0.00229659	3.65407e-06	0
1084	0	0.00229028	0	0
1085	0	0.00228299	0	0
1086	0	0.00227495	0	0
1087	0	0.00226615	0	0
1088	0	0.00225658	0	0
1089	0	0.00224625	0	0
1090	0	0.00223517	0	0
1091	0	0.00222335	0	0
1092	0	0.00221084	0	0
1093	0	0.00219766	0	0
1094	0	0.00218388	0	0
1095	0	0.00216953	0	0
1096	0	0.00215471	0	0
1097	0	0.00213947	0	0
1098	0	0.00212392	0	0
1099	0	0.00210812	0	0
1100	0	0.00209216	0	0
1101	0	0.00207602	1.28193e-06	0
1102	0	0.0020596	6.22307e-06	0
1103	0	0.00204315	1.19317e-05	0
1104	0	0.0020267	1.83867e-05	0
1105	0	0.0020103	2.55196e-05	0
1106	0	0.00199397	3.32171e-05	0
1107	0	0.00197772	4.13293e-05	0
1108	0	0.00196159	4.968e-05	0
1109	0	0.00194558	5.80788e-05	0
1110	0	0.00192972	6.63335e-05	0
1111	0	0.00191403	7.42593e-05	0
1112	0	0.00189853	8.16865e-05	0
1113	0	0.00188325	8.84638e-05	0
1114	0	0.00186824	9.44602e-05	0
1115	0	0.00185352	9.95649e-05	0
1116	0	0.00183915	0.000103688	0
1117	0	0.00182516	0.000106759	0
1118	0	0.0018116	0.000108735	0
1119	0	0.00179851	0.000109595	0
1120	0	0.00178592	0.000109353	0
1121	0	0.00177384	0.000108051	0
1122	0	0.0017623	0.000105763	0
1123	0	0.00175131	0.000102588	0
1124	0	0.00174086	9.86457e-05	0
1125	0	0.00173096	9.40639e-05	0
1126	0	0.00172157	8.89714e-05	0
1127	0	0.00171271	8.34896e-05	0
1128	0	0.00170433	7.77276e-05	0
1129	0	0.00169642	7.17813e-05	0
1130	0	0.00168897	6.57361e-05	0
1131	0	0.00168193	5.96713e-05	0
1132	0	0.00167528	5.36659e-05	0
1133	0	0.00166899	4.78035e-05	0
1134	0	0.001663	4.21747e-05	0
1135	0	0.00165728	3.68766e-05	0
1136	0	0.00165178	3.20099e-05	0
1137	0	0.00164643	2.76754e-05	0
1138	0	0.00164118	2.39748e-05	0
1139	0	0.00163597	2.09718e-05	0
1140	0	0.00163073	1.87194e-05	0
1141	0	0.00162542	1.72461e-05	0
1142	0	0.00161997	1.65548e-05	0
1143	0	0.00161435	1.66227e-05	0
1144	0	0.00160852	1.74029e-05	0
1145	0	0.00160245	1.88276e-05	0
1146	0	0.00159613	2.08112e-05	0
1147	0	0.00158954	2.32546e-05	0
1148	0	0.00158269	2.60487e-05	0
1149	0	0.00157557	2.90794e-05	0
1150	0	0.0015682	3.22315e-05	0
1151	0	0.0015606	3.53937e-05	0
1152	0	0.00155277	3.84625e-05	0
1153	0	0.00154474	4.13465e-05	0
1154	0	0.00153653	4.39689e-05	0
1155	0	0.00152816	4.62703e-05	0
1156	0	0.00151964	4.82091e-05	0
1157	0	0.00151099	4.97611e-05	0
1158	0	0.00150222	5.09182e-05	0
1159	0	0.00149334	5.16856e-05	0
1160	0	0.00148436	5.20785e-05	0
1161	0	0.00147528	5.21188e-05	0
1162	0	0.0014661	5.18314e-05	0
1163	0	0.00145682	5.1241e-05	0
1164	0	0.00144744	5.03695e-05	0
1165	0	0.00143796	4.92344e-05	0
1166	0	0.00142838	4.78476e-05	0
1167	0	0.00141868	4.62158e-05	0
1168	0	0.00140888	4.43412e-05	0
1169	0	0.00139896	4.22241e-05	0
1170	0	0.00138894	3.98652e-05	0
1171	0	0.00137879	3.727e-05	0
1172	0	0.00136854	3.44531e-05	0
1173	0	0.00135818	3.14425e-05	0
1174	0	0.00134773	2.82849e-05	0
1175	0	0.00133718	2.50507e-05	0
1176	0	0.00132654	2.18384e-05	0
1177	0	0.00131583	1.87797e-05	0
1178	0	0.00130505	1.60428e-05	0
1179	0	0.00129421	1.38359e-05	0
1180	0	0.00128332	1.24273e-05	0
1181	0	0.00127237	1.20871e-05	0
1182	0	0.00126137	1.3118e-05	0
1183	0	0.00125032	1.58224e-05	0
1184	0	0.00123922	2.04703e-05	0
1185	0	0.00122807	2.72584e-05	0
1186	0	0.00121687	3.62634e-05	0
1187	0	0.00120563	4.73966e-05	0
1188	0	0.00119439	6.037e-05	0
1189	0	0.00118316	7.46843e-05	0
1190	0	0.001172	8.96476e-05	0
1191	0	0.00116096	0.000104429	0
1192	0	0.00115008	0.000118143	0
1193	0	0.00113942	0.000129956	0
1194	0	0.00112901	0.000139192	0
1195	0	0.00111888	0.000145424	0
1196	0	0.00110903	0.000148527	0
1197	0	0.00109943	0.000148688	0
1198	0	0.00109006	0.000146365	0
1199	0	0.00108088	0.000142205	0
1200	0	0.00107182	0.000136945	0
1201	0	0.00106285	0.000131307	0
1202	0	0.00105391	0.00012591	0
1203	0	0.00104499	0.000121209	0
1204	0	0.00103605	0.000117472	0
1205	0	0.0010271	0.000114786	0
1206	0	0.00101814	0.000113087	0
1207	0	0.00100917	0.000112206	0
1208	0	0.00100021	0.000111912	0
1209	0	0.000991268	0.00011196	0
1210	0	0.000982367	0.000112116	0
1211	0	0.000973517	0.000112186	0
1212	0	0.00096473	0.000112021	0
1213	0	0.000956017	0.000111524	0
1214	0	0.000947387	0.000110639	0
1215	0	0.000938847	0.000109354	0
1216	0	0.000930406	0.000107681	0
1217	0	0.000922068	0.000105656	0
1218	0	0.00091384	0.000103329	0
1219	0	0.000905727	0.000100753	0
1220	0	0.000897733	9.7986e-05	0
1221	0	0.000889861	9.50807e-05	0
1222	0	0.000882115	9.20838e-05	0
1223	0	0.000874495	8.90378e-05	0
1224	0	0.000866999	8.59729e-05	0
1225	0	0.000859628	8.29096e-05	0
1226	0	0.000852378	7.98591e-05	0
1227	0	0.000845246	7.68245e-05	0
1228	0	0.00083823	7.38034e-05	0
1229	0	0.000831324	7.07905e-05	0
1230	0	0.000824525	6.77815e-05	0
1231	0	0.000817828	6.4777e-05	0
1232	0	0.00081123	6.17847e-05	0
1233	0	0.000804728	5.8822e-05	0
1234	0	0.00079832	5.5915e-05	0
1235	0	0.000792006	5.30972e-05	0
1236	0	0.000785785	5.04055e-05	0
1237	0	0.000779657	4.7875e-05	0
1238	0	0.000773624	4.55344e-05	0
1239	0	0.000767686	4.34007e-05	0
1240	0	0.000761844	4.14764e-05	0
1241	0	0.000756099	3.97481e-05	0
1242	0	0.000750451	3.81881e-05	0
1243	0	0.0007449	3.67578e-05	0
1244	0	0.000739387	3.529e-05	2.87657e-07
1245	0	0.000733623	3.31368e-05	2.27212e-06
1246	0	0.000727981	3.10393e-05	4.14366e-06
1247	0	0.000722467	2.89831e-05	5.88108e-06
1248	0	0.000717082	2.69611e-05	7.48351e-06
1249	0	0.000711824	2.49739e-05	8.97112e-06
1250	0	0.000706688	2.30298e-05	1.03825e-05
1251	0	0.000701663	2.1144e-05	1.17691e-05
1252	0	0.00069674	1.93373e-05	1.31879e-05
1253	0	0.000691909	1.76338e-05	1.46926e-05
1254	0	0.000687159	1.60597e-05	1.63257e-05
1255	0	0.000682483	1.4641e-05	1.81114e-05
1256	0	0.00067788	1.34027e-05	2.00516e-05
1257	0	0.000673348	1.2367e-05	2.21243e-05
1258	0	0.000668893	1.15523e-05	2.42859e-05
1259	0	0.000664522	1.09719e-05	2.6476e-05
1260	0	0.000660244	1.06333e-05	2.86241e-05
1261	0	0.00065607	1.05365e-05	3.06588e-05
1262	0	0.000652009	1.06736e-05	3.25153e-05
1263	0	0.000648069	1.10281e-05	3.41435e-05
1264	0	0.000644255	1.15778e-05	3.55077e-05
1265	0	0.000640568	1.22852e-05	3.66046e-05
1266	0	0.000637005	1.31096e-05	3.74509e-05
1267	0	0.000633561	1.40065e-05	3.80813e-05
1268	0	0.000630229	1.49298e-05	3.85453e-05
1269	0	0.000627002	1.58344e-05	3.89006e-05
1270	0	0.000623873	1.66793e-05	3.92076e-05
1271	0	0.000620834	1.74296e-05	3.9524e-05
1272	0	0.000617883	1.80586e-05	3.99003e-05
1273	0	0.000615015	1.85488e-05	4.03783e-05
1274	0	0.000612231	1.88919e-05	4.09895e-05
1275	0	0.000609531	1.90888e-05	4.17566e-05
1276	0	0.000606917	1.91482e-05	4.26945e-05
1277	0	0.00060439	1.90851e-05	4.38125e-05
1278	0	0.000601954	1.89191e-05	4.51159e-05
1279	0	0.000599609	1.86722e-05	4.66074e-05
1280	0	0.000597356	1.83666e-05	4.82868e-05
1281	0	0.000595197	1.80229e-05	5.01507e-05
1282	0	0.000593133	1.76582e-05	5.21904e-05
1283	0	0.000591164	1.72843e-05	5.43904e-05
1284	0	0.000589295	1.69072e-05	5.67261e-05
1285	0	0.000587527	1.65261e-05	5.91629e-05
1286	0	0.000585868	1.6134e-05	6.16557e-05
1287	0	0.000584325	1.57189e-05	6.41509e-05
1288	0	0.000582906	1.5265e-05	6.65888e-05
1289	0	0.000581622	1.47556e-05	6.89084e-05
1290	0	0.000580482	1.41752e-05	7.10531e-05
1291	0	0.000579496	1.35129e-05	7.29761e-05
1292	0	0.000578672	1.27642e-05	7.4646e-05
1293	0	0.000578012	1.1933e-05	7.60518e-05
1294	0	0.00057752	1.10329e-05	7.72047e-05
1295	0	0.000577193	1.00867e-05	7.814e-05
1296	0	0.000577025	9.12584e-06	7.89154e-05
1297	0	0.000577005	8.18838e-06	7.96085e-05
1298	0	0.000577121	7.31714e-06	8.03129e-05
1299	0	0.000577357	6.55698e-06	8.1134e-05
1300	0	0.000577694	5.95246e-06	8.21837e-05
1301	0	0.000578112	5.54565e-06	8.35765e-05
1302	0	0.000578591	5.37439e-06	8.54242e-05
1303	0	0.000579109	5.47085e-06	8.78318e-05
1304	0	0.000579645	5.86056e-06	9.08924e-05
1305	0	0.000580182	6.56163e-06	9.46813e-05
1306	0	0.000580702	7.58953e-06	9.92635e-05
1307	0	0.000581195	8.94205e-06	0.000104651
1308	0	0.000581656	1.06093e-05	0.000110819
1309	0	0.000582085	1.25744e-05	0.000117706
1310	0	0.000582493	1.48115e-05	0.000125206
1311	0	0.000582896	1.72866e-05	0.000133165
1312	0	0.000583317	1.99592e-05	0.000141395
1313	0	0.000583783	2.27838e-05	0.000149676
1314	0	0.000584326	2.57125e-05	0.000157777
1315	0	0.000584972	2.86983e-05	0.00016547
1316	0	0.000585748	3.16978e-05	0.000172553
1317	0	0.000586671	3.46743e-05	0.000178864
1318	0	0.000587747	3.76001e-05	0.0001843
1319	0	0.000588971	4.04584e-05	0.000188821
1320	0	0.000590327	4.32441e-05	0.000192458
1321	0	0.000591786	4.59636e-05	0.000195307
1322	0	0.000593311	4.8634e-05	0.000197515
1323	0	0.000594857	5.12814e-05	0.000199267
1324	0	0.000596378	5.39398e-05	0.000200767
1325	0	0.000597828	5.6649e-05	0.000202218
1326	0	0.000599165	5.94541e-05	0.000203804
1327	0	0.000600353	6.24052e-05	0.000205677
1328	0	0.000601367	6.55585e-05	0.000207944
1329	0	0.00060219	6.89786e-05	0.000210666
1330	0	0.000602813	7.27419e-05	0.000213853
1331	0	0.000603238	7.69414e-05	0.00021747
1332	0	0.000603473	8.16909e-05	0.000221438
1333	0	0.000603532	8.7129e-05	0.000225646
1334	0	0.00060343	9.34201e-05	0.00022996
1335	0	0.000603184	0.000100751	0.000234231
1336	0	0.000602811	0.000109316	0.000238308
1337	0	0.000602323	0.000119301	0.000242054
1338	0	0.000601731	0.000130846	0.00024536
1339	0	0.000601043	0.000144008	0.00024816
1340	0	0.000600263	0.000158715	0.000250443
1341	0	0.000599394	0.000174731	0.000252261
1342	0	0.000598441	0.000191631	0.000253738
1343	0	0.000597408	0.000208808	0.000255062
1344	0	0.0005963	0.000225511	0.000256471
1345	0	0.000595125	0.000240913	0.000258237
1346	0	0.000593889	0.00025421	0.000260633
1347	0	0.000592599	0.000264731	0.000263912
1348	0	0.000591257	0.000271989	0.000268291
1349	0	0.000589863	0.000275869	0.000273892
1350	0	0.000588413	0.000276604	0.000280747
1351	0	0.0005869	0.000274692	0.000288811
1352	0	0.000585316	0.000270848	0.000297964
1353	0	0.000583657	0.000265903	0.000308027
1354	0	0.000581923	0.000260689	0.00031878
1355	0	0.00058012	0.000255943	0.000329976
1356	0	0.000578263	0.000252232	0.000341363
1357	0	0.000576374	0.000249918	0.000352696
1358	0	0.000574484	0.00024916	0.000363741
1359	0	0.000572624	0.000249939	0.000374292
1360	0	0.000570828	0.000252107	0.000384172
1361	0	0.000569125	0.000255435	0.000393244
1362	0	0.000567537	0.000259669	0.000401419
1363	0	0.000566077	0.000264568	0.00040866
1364	0	0.000564747	0.000269939	0.00041499
1365	0	0.000563533	0.00027565	0.000420489
1366	0	0.000562413	0.000281647	0.000425289
1367	0	0.000561354	0.000287953	0.000429564
1368	0	0.000560315	0.000294663	0.000433511
1369	0	0.000559253	0.000301939	0.00043733
1370	0	0.000558125	0.000310001	0.000441206
1371	0	0.000556892	0.000319116	0.000445288
1372	0	0.000555523	0.000329593	0.000449675
1373	0	0.000553994	0.000341778	0.000454414
1374	0	0.000552287	0.000356053	0.000459494
1375	0	0.000550392	0.000372844	0.000464857
1376	0	0.000548301	0.000392633	0.000470413
1377	0	0.000546005	0.000415978	0.000476048
1378	0	0.000543494	0.00044353	0.000481645
1379	0	0.000540747	0.000476045	0.000487094
1380	0	0.000537737	0.000514379	0.0004923
1381	0	0.000534429	0.000559463	0.000497194
1382	0	0.000530782	0.000612239	0.000501734
1383	0	0.000526756	0.000673562	0.000505911
1384	0	0.000522315	0.000744073	0.000509756
1385	0	0.000517438	0.000824067	0.000513341
1386	0	0.00051212	0.000913375	0.000516789
1387	0	0.000506378	0.0010113	0.000520267
1388	0	0.000500252	0.00111667	0.000523984
1389	0	0.000493795	0.00122792	0.000528161
1390	0	0.000487072	0.00134347	0.000533016
1391	0	0.000480146	0.00146184	0.000538698
1392	0	0.000473064	0.00158219	0.000545242
1393	0	0.000465849	0.0017046	0.000552557
1394	0	0.000458485	0.0018302	0.000560399
1395	0	0.000450925	0.00196126	0.000568377
1396	0	0.000443084	0.00210104	0.000575976
1397	0	0.000434848	0.00225363	0.000582596
1398	0	0.000426075	0.00242374	0.000587584
1399	0	0.000416608	0.0026164	0.000590285
1400	0	0.000406271	0.00283681	0.000590061
1401	0	0.000394878	0.00309015	0.000586326
1402	0	0.000382241	0.00338134	0.000578565
1403	0	0.000368173	0.00371486	0.000566363
1404	0	0.0003525	0.00409441	0.000549439
1405	0	0.000335078	0.00452255	0.000527683
1406	0	0.000315804	0.00500036	0.000501191
1407	0	0.000294634	0.00552716	0.000470277
1408	0	0.000271588	0.00610043	0.000435466
1409	0	0.000246757	0.00671588	0.000397448
1410	0	0.000220302	0.00736776	0.000357009
1411	0	0.000192444	0.00804925	0.000314951
1412	0	0.000163458	0.00875291	0.000272011
1413	0	0.000133663	0.00947096	0.000228813
1414	0	0.000103417	0.0101955	0.000185854
1415	0	7.31147e-05	0.0109183	0.000143526
1416	0	4.31801e-05	0.0116311	0.000102184
1417	0	1.40679e-05	0.0123249	6.22085e-05
1418	0	0	0.0129856	1.24894e-05
1419	0	0	0.0135768	0
1420	0	0	0.0141154	0
1421	0	0	0.0146003	0
1422	0	0	0.015024	0
1423	0	0	0.0153812	0
1424	0	0	0.0156697	0
1425	0	0	0.0158906	0
1426	0	0	0.0160486	0
1427	0	0	0.0161517	0
1428	0	0	0.0162101	0
1429	0	0	0.0162349	0
1430	0	0	0.016237	0
1431	0	0	0.0162252	0
1432	0	0	0.0162053	0
1433	0	0	0.0161796	0
1434	0	0	0.0161473	0
1435	0	0	0.0161045	0
1436	0	0	0.0160461	0
1437	0	0	0.0159667	0
1438	0	0	0.0158611	0
1439	0	0	0.0157256	0
1440	0	0	0.0155573	0
1441	0	0	0.0153542	0
1442	0	0	0.0151143	0
1443	0	0	0.0148353	0
1444	0	0	0.0145142	0
1445	0	0	0.0141474	0
1446	0	2.01259e-05	0.0137146	0
1447	0	5.0329e-05	0.0132209	0
1448	0	8.39029e-05	0.0126705	0
1449	0	0.000120779	0.0120647	0
1450	0	0.000154768	0.0113955	2.87323e-05
1451	0	0.000185977	0.0106723	8.32319e-05
1452	0	0.000218489	0.00991617	0.000140246
1453	0	0.000251815	0.00914142	0.000198035
1454	0	0.000285407	0.00836358	0.000254783
1455	0	0.00031871	0.00759803	0.000308796
1456	0	0.000351195	0.00685867	0.00035868
1457	0	0.000382405	0.00615684	0.000403479
1458	0	0.00041197	0.00550072	0.000442733
1459	0	0.000439623	0.00489509	0.000476463
1460	0	0.000465194	0.00434172	0.000505087
1461	0	0.000488603	0.0038399	0.000529284
1462	0	0.000509836	0.00338733	0.000549836
1463	0	0.000528929	0.00298091	0.000567488
1464	0	0.00054595	0.00261737	0.000582834
1465	0	0.000560984	0.00229377	0.000596258
1466	0	0.000574134	0.00200759	0.000607932
1467	0	0.000585507	0.00175673	0.000617854
1468	0	0.000595228	0.00153924	0.000625922
1469	0	0.000603432	0.00135304	0.000632016
1470	0	0.000610267	0.00119572	0.000636072
1471	0	0.000615897	0.00106436	0.00063813
1472	0	0.00062049	0.000955564	0.000638359
1473	0	0.000624215	0.000865588	0.000637044
1474	0	0.000627228	0.000790648	0.000634549
1475	0	0.00062967	0.000727046	0.00063128
1476	0	0.000631671	0.000671322	0.000627636
1477	0	0.000633317	0.000620883	0.000623935
1478	0	0.000634668	0.000573869	0.000620406
1479	0	0.000635754	0.000529145	0.000617181
1480	0	0.000636584	0.000486209	0.000614304
1481	0	0.000637144	0.000445045	0.000611754
1482	0	0.000637412	0.00040595	0.000609473
1483	0	0.000637356	0.000369372	0.000607391
1484	0	0.000636941	0.00033579	0.000605445
1485	0	0.000636133	0.000305628	0.000603598
1486	0	0.000634901	0.00027922	0.00060183
1487	0	0.000633221	0.000256807	0.000600142
1488	0	0.000631072	0.000238558	0.000598537
1489	0	0.000628442	0.000224589	0.000597011
1490	0	0.00062533	0.000214974	0.00059554
1491	0	0.000621742	0.000209734	0.000594073
1492	0	0.000617698	0.000208807	0.00059254
1493	0	0.000613231	0.000211989	0.000590851
1494	0	0.000608385	0.000218871	0.00058892
1495	0	0.00060322	0.000228778	0.000586681
1496	0	0.000597804	0.000240738	0.000584104
1497	0	0.000592214	0.000253486	0.000581213
1498	0	0.000586531	0.000265532	0.000578084
1499	0	0.000580829	0.000275282	0.000574844
1500	0	0.000575175	0.000281205	0.000571649
1501	0	0.000569621	0.000282027	0.000568661
1502	0	0.000564195	0.000276901	0.000566021
1503	0	0.000558904	0.000265539	0.00056382
1504	0	0.00055373	0.000248264	0.000562086
1505	0	0.000548639	0.000225965	0.000560779
1506	0	0.000543581	0.000199976	0.000559791
1507	0	0.000538503	0.000171889	0.000558969
1508	0	0.000533357	0.000143344	0.000558132
1509	0	0.000528107	0.000115826	0.000557088
1510	0	0.000522733	9.05194e-05	0.000555656
1511	0	0.000517235	6.82158e-05	0.000553675
1512	0	0.000511636	4.9306e-05	0.000551006
1513	0	0.00050597	3.38274e-05	0.000547535
1514	0	0.000500284	2.15586e-05	0.000543169
1515	0	0.000494627	1.2132e-05	0.000537838
1516	0	0.000489045	5.15467e-06	0.000531489
1517	0	0.000483573	2.96198e-07	0.000524085
1518	0	0.00047815	0	0.000515228
1519	0	0.000472898	0	0.00050563
1520	0	0.000467813	0	0.000495437
1521	0	0.000462868	0	0.0004848
1522	0	0.000457973	1.99837e-06	0.000473599
1523	0	0.00045306	7.07728e-06	0.000461884
1524	0	0.000448148	1.32601e-05	0.000450197
1525	0	0.00044322	2.00296e-05	0.000438832
1526	0	0.000438269	2.67145e-05	0.000428078
1527	0	0.000433301	3.25574e-05	0.000418193
1528	0	0.000428333	3.68138e-05	0.000409381
1529	0	0.000423385	3.88625e-05	0.000401774
1530	0	0.000418482	3.83033e-05	0.000395417
1531	0	0.000413648	3.50223e-05	0.000390271
1532	0	0.000408903	2.92093e-05	0.000386214
1533	0	0.00040426	2.13265e-05	0.000383063
1534	0	0.000399728	1.20358e-05	0.000380594
1535	0	0.000395311	2.10299e-06	0.00037857
1536	0	0.000390784	0	0.000375539
1537	0	0.000386334	0	0.000372319
1538	0	0.000382038	0	0.000369175
1539	0	0.000377904	0	0.000366057
1540	0	0.00037394	0	0.000362938
1541	0	0.000370148	0	0.000359812
1542	0	0.000366527	0	0.000356692
1543	0	0.000363072	0	0.000353609
1544	0	0.000359779	0	0.000350609
1545	0	0.000356639	0	0.00034775
1546	0	0.000353643	0	0.0003451
1547	0	0.000350688	3.29147e-06	0.000342207
1548	0	0.000347622	1.47431e-05	0.000338373
1549	0	0.000344683	2.59919e-05	0.000334994
1550	0	0.00034189	3.6134e-05	0.000332274
1551	0	0.000339269	4.42671e-05	0.000330404
1552	0	0.000336842	4.95998e-05	0.000329538
1553	0	0.000334632	5.15572e-05	0.000329782
1554	0	0.000332652	4.98624e-05	0.00033117
1555	0	0.000330914	4.45745e-05	0.000333668
1556	0	0.00032942	3.60767e-05	0.000337173
1557	0	0.000328166	2.5014e-05	0.000341529
1558	0	0.000327147	1.2195e-05	0.000346549
1559	0	0.000326314	0	0.000351795
1560	0	0.000325343	0	0.000355365
1561	0	0.000324601	0	0.000359148
1562	0	0.000324097	0	0.000363108
1563	0	0.000323838	0	0.000367226
1564	0	0.000323826	0	0.0003715
1565	0	0.000324056	0	0.000375945
1566	0	0.000324524	0	0.000380592
1567	0	0.000325221	0	0.000385482
1568	0	0.000326133	0	0.000390667
1569	0	0.00032725	0	0.000396207
1570	0	0.000328555	0	0.000402162
1571	0	0.000330037	0	0.000408595
1572	0	0.000331681	0	0.000415563
1573	0	0.000333477	0	0.00042312
1574	0	0.000335415	0	0.00043131
1575	0	0.000337488	0	0.000440167
1576	0	0.000339693	0	0.000449711
1577	0	0.00034203	0	0.000459949
1578	0	0.000344503	0	0.000470871
1579	0	0.00034712	0	0.000482451
1580	0	0.000349891	0	0.000494646
1581	0	0.000352833	0	0.000507397
1582	0	0.000355964	0	0.000520628
1583	0	0.000359303	0	0.00053425
1584	0	0.000362876	0	0.000548159
1585	0	0.000366706	0	0.000562239
1586	0	0.000370821	0	0.000576369
1587	0	0.000375245	0	0.000590423
1588	0	0.000380002	0	0.000604278
1589	0	0.000385113	0	0.000617823
1590	0	0.000390593	0	0.000630966
1591	0	0.000396448	0	0.000643644
1592	0	0.000402679	0	0.000655829
1593	0	0.000409273	0	0.000667533
1594	0	0.000416209	0	0.000678812
1595	0	0.000423458	0	0.000689762
1596	0	0.000430981	0	0.000700514
1597	0	0.000438733	0	0.000711229
1598	0	0.000446667	0	0.00072208
1599	0	0.000454736	0	0.000733245
1600	0	0.000462896	0	0.000744892
1601	0	0.000471107	0	0.000757182
1602	0	0.000479336	0	0.000770217
1603	0	0.00048756	0	0.000784074
1604	0	0.000495764	0	0.000798788
1605	0	0.000503943	0	0.000814356
1606	0	0.000512096	0	0.000830742
1607	0	0.000520229	0	0.000847884
1608	0	0.000528347	0	0.000865702
1609	0	0.000536456	0	0.00088411
1610	0	0.00054456	0	0.000903024
1611	0	0.000552656	0	0.000922375
1612	0	0.000560735	0	0.000942109
1613	0	0.00056878	0	0.000962195
1614	0	0.000576767	0	0.000982625
1615	0	0.000584668	0	0.0010034
1616	0	0.000592449	0	0.00102455
1617	0	0.000600077	0	0.00104606
1618	0	0.000607519	0	0.00106794
1619	0	0.000614751	0	0.00109017
1620	0	0.000621755	0	0.00111266
1621	0	0.00062852	0	0.00113531
1622	0	0.000635049	0	0.00115799
1623	0	0.00064135	0	0.0011805
1624	0	0.000647437	0	0.00120266
1625	0	0.000653326	0	0.00122426
1626	0	0.000659029	0	0.00124513
1627	0	0.000664555	0	0.00126512
1628	0	0.0006699	0	0.00128413
1629	0	0.000675046	0	0.00130214
1630	0	0.000679965	0	0.00131919
1631	0	0.000684616	0	0.00133536
1632	0	0.000688946	0	0.00135082
1633	0	0.000692902	0	0.00136573
1634	0	0.000696426	0	0.00138027
1635	0	0.000699472	0	0.00139461
1636	0	0.000702	0	0.00140886
1637	0	0.000703985	0	0.00142309
1638	0	0.00070542	0	0.00143729
1639	0	0.00070631	0	0.00145142
1640	0	0.00070667	0	0.00146538
1641	0	0.00070652	0	0.00147907
1642	0	0.000705881	0	0.00149238
1643	0	0.000704751	0	0.00150527
1644	0	0.000703135	0	0.00151779
1645	0	0.000701008	0	0.00153008
1646	0	0.000698323	0	0.00154239
1647	0	0.000695015	0	0.00155507
1648	0	0.000691003	0	0.00156854
1649	0	0.0006862	0	0.00158329
1650	0	0.000680517	0	0.00159982
1651	0	0.000673876	0	0.00161858
1652	0	0.000666214	0	0.00163997
1653	0	0.000657492	0	0.00166431
1654	0	0.000647696	0	0.0016918
1655	0	0.000636841	0	0.00172252
1656	0	0.000624961	0	0.00175644
1657	0	0.000612112	0	0.00179348
1658	0	0.000598355	0	0.00183347
1659	0	0.000583755	0	0.00187625
1660	0	0.000568362	0	0.00192168
1661	0	0.000551698	1.75786e-05	0.00196691
1662	0	0.000534226	3.70753e-05	0.00201444
1663	0	0.00051597	5.67706e-05	0.00206466
1664	0	0.000496888	7.62873e-05	0.0021179
1665	0	0.000476906	9.52939e-05	0.00217455
1666	0	0.000455927	0.00011354	0.00223507
1667	0	0.000433843	0.000130893	0.00229998
1668	0	0.000410536	0.000147368	0.00236974
1669	0	0.000385899	0.000163156	0.00244478
1670	0	0.000359838	0.000178633	0.00252542
1671	0	0.000332284	0.00019436	0.00261183
1672	0	0.000303196	0.000211066	0.00270408
1673	0	0.00027256	0.000229616	0.00280207
1674	0	0.000240389	0.000250971	0.0029056
1675	0	0.000206717	0.000276134	0.0030144
1676	0	0.000171591	0.000306102	0.00312813
1677	0	0.000135066	0.000341808	0.00324647
1678	0	9.72005e-05	0.000384068	0.00336908
1679	0	5.80576e-05	0.00043352	0.00349569
1680	0	1.77076e-05	0.000490557	0.00362604
1681	0	0	0.000547601	0.00373981
1682	0	0	0.000605973	0.00384097
1683	0	0	0.000670677	0.00394419
1684	0	0	0.00074055	0.00404911
1685	0	0	0.00081403	0.00415525
1686	0	0	0.00088909	0.00426192
1687	0	0	0.000963652	0.00436825
1688	0	0	0.00103578	0.00447319
1689	0	0	0.00110397	0.00457548
1690	0	0	0.00116735	0.00467374
1691	0	0	0.00122593	0.00476652
1692	0	0	0.0012806	0.00485232
1693	0	0	0.00133301	0.0049298
1694	0	0	0.00138534	0.00499775
1695	0	0	0.00143993	0.00505525
1696	0	0	0.00149892	0.00510169
1697	0	0	0.00156388	0.00513679
1698	0	0	0.00163562	0.00516056
1699	0	0	0.00171412	0.00517326
1700	0	0	0.00179857	0.00517532
1701	0	0	0.00188756	0.00516722
1702	0	0	0.00197937	0.00514948
1703	0	0	0.00207218	0.00512254
1704	0	0	0.00216436	0.00508679
1705	0	0	0.00225464	0.00504253
1706	0	0	0.00234224	0.00499002
1707	0	0	0.00242696	0.00492949
1708	0	0	0.00250917	0.00486119
1709	0	0	0.00258977	0.0047854
1710	0	0	0.00267008	0.00470246
1711	0	0	0.00275172	0.00461279
1712	0	0	0.00283638	0.00451686
1713	0	0	0.00292559	0.00441525
1714	0	0	0.00302045	0.0043086
1715	0	0	0.0031214	0.00419765
1716	0	0	0.00322797	0.00408326
1717	0	0	0.00333874	0.00396638
1718	0	0	0.00345133	0.00384806
1719	0	0	0.00356248	0.00372948
1720	4.85414e-05	0	0.00366662	0.00361119
1721	0.000100173	0	0.0037613	0.00349508
1722	0.000153492	0	0.00384259	0.00338243
1723	0.000207724	0	0.00390691	0.00327449
1724	0.000262254	0	0.00395138	0.00317243
1725	0.000316665	0	0.00397391	0.00307731
1726	0.000370746	0	0.00397334	0.00299005
1727	0.000424431	0	0.003949	0.00291156
1728	0.000477714	0	0.00390161	0.00284234
1729	0.000530493	0	0.00383252	0.00278263
1730	0.000582429	0	0.00374343	0.00273252
1731	0.000632821	0	0.0036365	0.00269179
1732	0.000680544	0	0.00351421	0.00265992
1733	0.000724053	0	0.00337934	0.00263612
1734	0.000761475	0	0.00323487	0.00261931
1735	0.00079078	0	0.00308396	0.00260818
1736	0.000810012	0	0.00292986	0.00260126
1737	0.000817541	0	0.00277583	0.00259699
1738	0.000812307	0	0.00262502	0.00259383
1739	0.000794006	0	0.0024803	0.00259036
1740	0.000763192	0	0.00234412	0.00258534
1741	0.000718628	6.69349e-06	0.00221623	0.00257221
1742	0.000662647	1.96228e-05	0.00209785	0.00255075
1743	0.000600361	3.26602e-05	0.00199112	0.00252581
1744	0.000534759	4.57491e-05	0.00189548	0.0024975
1745	0.000468818	5.88096e-05	0.00180967	0.00246624
1746	0.000405227	7.1747e-05	0.00173195	0.00243268
1747	0.000346158	8.44587e-05	0.00166041	0.00239764
1748	0.000293123	9.68378e-05	0.00159319	0.00236194
1749	0.000246925	0.000108777	0.00152881	0.00232642
1750	0.000207694	0.00012017	0.00146625	0.00229182
1751	0.000175009	0.000130916	0.00140502	0.00225876
1752	0.000148066	0.000140924	0.00134502	0.00222777
1753	0.000125863	0.000150117	0.00128634	0.00219925
1754	0.000107378	0.00015844	0.0012291	0.00217354
1755	9.17176e-05	0.000165861	0.00117323	0.00215091
1756	7.82016e-05	0.00017237	0.00111843	0.0021316
1757	6.64054e-05	0.00017798	0.00106416	0.00211577
1758	5.61398e-05	0.000182718	0.00100975	0.00210354
1759	4.73933e-05	0.00018662	0.000954621	0.00209497
1760	4.02475e-05	0.000189728	0.000898392	0.00209
1761	3.47844e-05	0.000192082	0.000841025	0.00208847
1762	3.10031e-05	0.000193725	0.000782857	0.00209011
1763	2.87566e-05	0.000194704	0.000724547	0.00209454
1764	2.77216e-05	0.000195074	0.000666966	0.00210129
1765	2.74007e-05	0.000194907	0.000611045	0.0021098
1766	2.71589e-05	0.000194295	0.000557635	0.00211946
1767	2.62872e-05	0.00019335	0.000507391	0.00212961
1768	2.40845e-05	0.000192205	0.00046071	0.00213957
1769	1.99141e-05	0.000191007	0.000417764	0.00214868
1770	1.33478e-05	0.000189911	0.00037841	0.00215629
1771	4.2296e-06	0.000189062	0.000342294	0.00216183
1772	0	0.000188494	0.000308751	0.00216482
1773	0	0.000188322	0.000277358	0.00216487
1774	0	0.000188675	0.000247867	0.00216176
1775	0	0.000189593	0.000220029	0.00215535
1776	0	0.00019108	0.00019379	0.00214563
1777	0	0.0001931	0.000169329	0.00213269
1778	0	0.000195587	0.000147053	0.00211673
1779	0	0.000198446	0.000127536	0.002098
1780	0	0.000201565	0.000111412	0.00207682
1781	0	0.000204826	9.92204e-05	0.00205361
1782	0	0.000208113	9.12407e-05	0.0020288
1783	0	0.000211322	8.7347e-05	0.00200291
1784	0	0.000214372	8.69228e-05	0.00197652
1785	0	0.0002172	8.88642e-05	0.00195021
1786	0	0.000219769	9.16833e-05	0.00192461
1787	0	0.00022206	9.36978e-05	0.00190026
1788	0	0.000224064	9.32715e-05	0.00187769
1789	0	0.000225782	8.9057e-05	0.00185726
1790	0	0.000227212	8.01888e-05	0.00183923
1791	0	0.00022835	6.6389e-05	0.00182368
1792	0	0.000229187	4.79647e-05	0.00181055
1793	0	0.000229709	2.57073e-05	0.00179969
1794	0	0.000229904	7.20867e-07	0.00179083
1795	0	0.000229008	0	0.00177959
1796	0	0.000227737	0	0.00176961
1797	0	0.000226138	0	0.00176091
1798	0	0.000224241	0	0.00175341
1799	0	0.000222071	0	0.00174704
1800	0	0.00021965	0	0.00174176
1801	0	0.000216996	0	0.00173755
1802	0	0.000214127	0	0.00173439
1803	0	0.000211057	0	0.00173227
1804	0	0.000207803	0	0.00173117
1805	0	0.000204385	0	0.00173106
1806	0	0.000200823	0	0.00173187
1807	0	0.000197145	0	0.0017335
1808	0	0.00019338	0	0.00173581
1809	0	0.000189564	0	0.00173864
1810	0	0.00018573	0	0.00174182
1811	0	0.000181914	0	0.00174517
1812	0	0.000178147	0	0.0017485
1813	0	0.000174456	0	0.00175168
1814	0	0.000170855	0	0.00175463
1815	0	0.000167352	0	0.00175731
1816	0	0.000163945	0	0.00175977
1817	0	0.00016062	0	0.00176208
1818	0	0.000157356	0	0.00176441
1819	0	0.000154126	0	0.00176692
1820	0	0.0001509	0	0.00176981
1821	0	0.000147647	0	0.00177327
1822	0	0.000144341	0	0.00177747
1823	0	0.000140961	0	0.00178253
1824	0	0.000137493	0	0.00178851
1825	0	0.000133934	0	0.00179541
1826	0	0.000130289	0	0.00180318
1827	0	0.000126572	0	0.00181168
1828	0	0.000122806	0	0.00182076
1829	0	0.000119018	0	0.0018302
1830	0	0.000115241	0	0.00183976
1831	0	0.000111509	0	0.0018492
1832	0	0.000107858	0	0.00185825
1833	0	0.000104323	0	0.00186667
1834	0	0.000100938	0	0.00187422
1835	0	9.77387e-05	0	0.00188066
1836	0	9.47563e-05	0	0.00188579
1837	0	9.20241e-05	0	0.00188941
1838	0	8.95749e-05	0	0.00189133
1839	0	8.74413e-05	0	0.00189138
1840	0	8.56554e-05	0	0.00188941
1841	0	8.42475e-05	0	0.00188529
1842	0	8.32443e-05	0	0.00187892
1843	0	8.26668e-05	0	0.00187023
1844	0	8.25282e-05	0	0.0018592
1845	0	8.28318e-05	0	0.00184585
1846	0	8.35697e-05	0	0.00183026
1847	0	8.47227e-05	0	0.00181256
1848	0	8.62609e-05	0	0.0017929
1849	0	8.81455e-05	0	0.00177149
1850	0	9.03318e-05	0	0.00174853
1851	0	9.27724e-05	0	0.00172424
1852	0	9.54202e-05	0	0.00169883
1853	0	9.82322e-05	0	0.00167246
1854	0	0.000101168	0	0.00164531
1855	0	0.000104192	0	0.00161754
1856	0	0.000107272	0	0.00158927
1857	0	0.000110377	0	0.00156065
1858	0	0.000113477	0	0.00153183
1859	0	0.000116536	0	0.001503
1860	0	0.000119513	0	0.00147439
1861	0	0.000122362	0	0.00144623
1862	0	0.000125033	0	0.0014188
1863	0	0.00012748	0	0.00139237
1864	0	0.000129657	0	0.00136717
1865	0	0.000131533	0	0.0013434
1866	0	0.000133088	0	0.00132116
1867	0	0.00013432	0	0.0013005
1868	0	0.000135245	0	0.00128136
1869	0	0.000135894	0	0.00126361
1870	0	0.000136307	0	0.00124707
1871	0	0.000136529	0	0.00123156
1872	0	0.000136603	0	0.00121686
1873	0	0.000136563	0	0.00120283
1874	0	0.000136431	0	0.00118935
1875	0	0.000136216	0	0.00117638
1876	0	0.00013591	0	0.00116393
1877	0	0.000135498	0	0.00115207
1878	0	0.000134954	0	0.00114087
1879	0	0.000134253	0	0.00113042
1880	0	0.00013337	0	0.00112081
1881	0	0.000132288	0	0.00111209
1882	0	0.000130997	0	0.00110425
1883	0	0.000129496	0	0.00109729
1884	0	0.000127793	0	0.00109114
1885	0	0.000125901	0	0.00108573
1886	0	0.000123838	0	0.00108097
1887	0	0.000121624	0	0.00107678
1888	0	0.000119279	0	0.00107309
1889	0	0.000116821	0	0.00106983
1890	0	0.000114266	0	0.00106697
1891	0	0.000111628	0	0.00106447
1892	0	0.00010892	0	0.0010623
1893	0	0.000106155	0	0.00106045
1894	0	0.000103344	0	0.00105888
1895	0	0.0001005	0	0.00105755
1896	0	9.76381e-05	0	0.00105641
1897	0	9.47759e-05	0	0.0010554
1898	0	9.19311e-05	0	0.00105442
1899	0	8.91229e-05	0	0.0010534
1900	0	8.63711e-05	0	0.00105224
1901	0	8.36954e-05	0	0.00105084
1902	0	8.11151e-05	0	0.00104911
1903	0	7.86481e-05	0	0.00104696
1904	0	7.63104e-05	0	0.00104432
1905	0	7.41162e-05	0	0.00104112
1906	0	7.20771e-05	0	0.00103729
1907	0	7.02021e-05	0	0.00103281
1908	0	6.8498e-05	0	0.00102764
1909	0	6.69686e-05	0	0.00102177
1910	0	6.5616e-05	0	0.00101519
1911	0	6.44399e-05	0	0.00100792
1912	0	6.34385e-05	0	0.000999964
1913	0	6.26087e-05	0	0.000991347
1914	0	6.19464e-05	0	0.000982089
1915	0	6.14471e-05	0	0.000972212
1916	0	6.11062e-05	0	0.000961733
1917	0	6.09192e-05	0	0.000950665
1918	0	6.0882e-05	0	0.000939015
1919	0	6.09909e-05	0	0.000926783
1920	0	6.12422e-05	0	0.000913966
1921	0	6.16321e-05	0	0.00090056
1922	0	6.21559e-05	0	0.000886564
1923	0	6.2808e-05	0	0.000871986
1924	0	6.35806e-05	0	0.00085685
1925	0	6.44641e-05	0	0.000841194
1926	0	6.54458e-05	0	0.000825082
1927	0	6.65108e-05	0	0.000808596
1928	0	6.76419e-05	0	0.00079184
1929	0	6.88197e-05	0	0.000774935
1930	0	7.0024e-05	0	0.000758014
1931	0	7.1234e-05	0	0.000741215
1932	0	7.24296e-05	0	0.000724676
1933	0	7.35919e-05	0	0.000708527
1934	0	7.47042e-05	0	0.000692883
1935	0	7.57526e-05	0	0.000677844
1936	0	7.67265e-05	0	0.000663487
1937	0	7.76187e-05	0	0.000649869
1938	0	7.84248e-05	0	0.000637033
1939	0	7.91479e-05	0	0.000624972
1940	0	7.97932e-05	0	0.000613667
1941	0	8.03699e-05	0	0.000603082
1942	0	8.08904e-05	0	0.000593162
1943	0	8.13696e-05	0	0.000583839
1944	0	8.18237e-05	0	0.000575036
1945	0	8.22692e-05	0	0.000566675
1946	0	8.27215e-05	0	0.00055868
1947	0	8.31933e-05	0	0.000550985
1948	0	8.36941e-05	0	0.000543535
1949	0	8.4229e-05	0	0.000536293
1950	0	8.47992e-05	0	0.000529238
1951	0	8.5402e-05	0	0.000522364
1952	0	8.60319e-05	0	0.000515672
1953	0	8.66821e-05	0	0.000509172
1954	0	8.73459e-05	0	0.000502868
1955	0	8.80177e-05	0	0.000496762
1956	0	8.86941e-05	0	0.000490842
1957	0	8.93744e-05	0	0.000485087
1958	0	9.00602e-05	0	0.000479462
1959	0	9.07548e-05	0	0.00047393
1960	0	9.14616e-05	0	0.000468448
1961	0	9.21832e-05	0	0.000462981
1962	0	9.29201e-05	0	0.000457503
1963	0	9.36694e-05	0	0.000452
1964	0	9.44248e-05	0	0.00044648
1965	0	9.51764e-05	0	0.000440963
1966	0	9.59115e-05	0	0.000435486
1967	0	9.66154e-05	0	0.000430093
1968	0	9.72732e-05	0	0.000424835
1969	0	9.78704e-05	0	0.000419761
1970	0	9.83945e-05	0	0.000414913
1971	0	9.88358e-05	0	0.000410325
1972	0	9.91877e-05	0	0.000406018
1973	0	9.94472e-05	0	0.000402002
1974	0	9.96143e-05	0	0.000398273
1975	0	9.96918e-05	0	0.000394818
1976	0	9.96848e-05	0	0.000391616
1977	0	9.95999e-05	0	0.000388639
1978	0	9.94445e-05	0	0.000385858
1979	0	9.92265e-05	0	0.000383241
1980	0	9.89529e-05	0	0.000380761
1981	0	9.86325e-05	0	0.000378385
1982	0	9.82719e-05	0	0.000376087
1983	0	9.78774e-05	0	0.000373845
1984	0	9.74542e-05	0	0.000371642
1985	0	9.70065e-05	0	0.000369461
1986	0	9.65379e-05	0	0.000367291
1987	0	9.60513e-05	0	0.000365123
1988	0	9.55489e-05	0	0.000362953
1989	0	9.50323e-05	0	0.000360775
1990	0	9.45033e-05	0	0.000358586
1991	0	9.39634e-05	0	0.000356385
1992	0	9.34143e-05	0	0.000354168
1993	0	9.28583e-05	0	0.000351929
1994	0	9.22984e-05	0	0.000349661
1995	0	9.17384e-05	0	0.000347353
1996	0	9.11827e-05	0	0.000344992
1997	0	9.06369e-05	0	0.000342561
[truncated: 2,003 more rows]
[truncated: 71 more columns]

## Sheet: 5 Sources
Reconstructed Source Distributions								Compare Input & Reconstructed Sink Samples					Sink Sample Weights
Age (Ma)	Source 1	Source 2	Source 3	Source 4	Source 5				Mean		St. Dev.			Princeton, Bluestone, Hinton	Surprise Canyon3- 06GC149, Surprise_Cyn2, SurpriseC_Cngl	24PL09, 10JM94, 40JM94, 05PL15, 09LB04	Mauch_Chunk	KY-21-SG	Tonka	Stanley, Hot_spring	BC05	09-CM-699	MS11, MS10	MS01, MSGE313	BC01, BC02, CC01	ML01, MP-DZ1	1QZ19	SY-D, Watahomigi, Manakacha1	Tumbling Run, Pottsville Fm, OH-1-SS	Pocohontas, Lee, VA-1-GN	Racoon, Montevallo, Sewanee	KY-18-CB	OH-4-SN	BCRA-01-10	MB1-3, MB2-4, MB2-2, MB2-3, MB2-5, MB2-1, MB1-2, MB1-1	a16, a23, a29, a38, a48, a49, a50	46-1, 46-2	IB_AD, IB_M1, IB_M2	FCB_AD	FCB_A2	FCB_A1	S3	GS01, GS09	MS04, MS05, MS06	MC05, MC17	GS11, GS24	MC20	EC01, RC01, RC19	V01, V10, V18, V20
0	4.76844e-08	5.91207e-08	0	3.90814e-08	3.92146e-08			Cross-correlation	0.808341	±	0.155965		Weights Source 1	0.944237	0.696002	0	0.905543	0.757212	0	0.835787	0.0835627	0.837036	0.492867	0.36407	0.124619	0.874789	0.326548	0.378865	0.921946	0.929052	0.848961	0.714668	0.955474	0.879305	0.75269	0.722016	0.762321	0.762496	0.801024	0.737991	0.840668	0.795394	0.25795	0.962238	0.268923	0.0284257	0.335645	0.174598	0.00188996
1	4.7769e-08	5.92281e-08	0	3.91515e-08	3.92841e-08			Likeness	0.792205	±	0.0883265		Weights Source 2	0.0182172	0.16868	0.999152	0.0266959	0.154902	1	0.0791776	0.640423	0.0747758	0.191159	0	0.122195	0.0604773	0.535747	0.459384	0.0402	0.00942929	0.103964	0.226443	0.0128314	0.088356	0.190879	0.202461	0.178912	0.184045	0.105593	0.168743	0.134812	0.116257	0.378178	0	0.422627	0	0.422207	0.276727	0.154258
2	4.79384e-08	5.94429e-08	0	3.92918e-08	3.9423e-08			Kuiper V Value	0.144297	±	0.0904491		Weights Source 3	0.0265268	0.064449	0	0.0530087	0.0337392	0	0.0256331	0.161292	0.0549159	0.209184	0.163827	0.201883	0.0428904	0.0532514	0.0316486	0.0192752	0.053244	0.0165705	0.0177716	0.022974	0.0224898	0.0224901	0.033807	0.029877	0.011562	0.0645632	0.0429118	0.0167423	0.0191448	0.149431	0.0377617	0.109714	0.457506	0.125228	0.0864445	0
3	4.81926e-08	5.97653e-08	0	3.95024e-08	3.96315e-08			KS D Value	0.113507	±	0.0795349		Weights Source 4	0.0110191	0.0693602	0	0.00423238	0.0522853	0	0.0167495	0.111418	0.00828218	0.10679	0.472103	0.518573	0.0116949	0.0832539	0.129518	0.00863434	0.00827481	0.0265023	0.041117	0.00872037	0.00122299	0.033832	0.0417154	0.0288895	0.0392303	0.020386	0.0479418	0.00777792	0.0490107	0.214441	0	0.194484	0.514068	0.110359	0.454631	0.843852
4	4.85316e-08	6.01954e-08	0	3.97832e-08	3.99096e-08								Weights Source 5	0	0.00150935	0.000847685	0.0105204	0.00186149	0	0.0426526	0.00330384	0.0249903	0	0	0.0327303	0.0101482	0.0011991	0.000584798	0.00994483	0	0.00400225	0	0	0.00862591	0.000108646	0	0	0.00266622	0.00843288	0.00241252	0	0.0201934	0	0	0.00425195	0	0.00656126	0.0075994	0
5	4.89556e-08	6.07336e-08	0	4.01346e-08	4.02575e-08			Number of sink samples	108
6	4.94649e-08	6.138e-08	0	4.05566e-08	4.06752e-08			Mean Cross-correlation of sink samples	0.372				Cross-correlation	0.906427	0.943063	0.628148	0.908884	0.943466	0.603764	0.846539	0.614399	0.872442	0.798382	0.707656	0.876183	0.912182	0.700904	0.861543	0.742388	0.83452	0.877807	0.90163	0.907888	0.91263	0.858527	0.867971	0.857797	0.927016	0.928934	0.962424	0.783586	0.9006	0.8703	0.466107	0.873231	0.928708	0.776816	0.823185	0.964229
7	5.00595e-08	6.21351e-08	0	4.10495e-08	4.11631e-08			Range Cross-correlation of sink samples	0.963				Likeness	0.806216	0.876771	0.625077	0.834433	0.867172	0.608114	0.789125	0.596078	0.830951	0.701018	0.663041	0.758464	0.863878	0.795178	0.844275	0.791346	0.772719	0.812787	0.813986	0.825347	0.820992	0.795277	0.847505	0.806967	0.867585	0.859435	0.899529	0.70841	0.848217	0.77643	0.365775	0.790882	0.806052	0.80197	0.779101	0.82955
8	5.07399e-08	6.29994e-08	0	4.16135e-08	4.17212e-08			Mean Kuiper V value of sink samples	0.408				Kuiper V Value	0.155094	0.0780918	0.356648	0.123681	0.0849048	0.360097	0.144595	0.281015	0.0707698	0.265621	0.126413	0.100036	0.0726495	0.157132	0.10997	0.104942	0.200737	0.118567	0.107887	0.0662597	0.0903486	0.148594	0.111398	0.155249	0.0594329	0.0680825	0.0538604	0.183863	0.101928	0.196594	0.602089	0.184125	0.0969365	0.172615	0.147949	0.0618505
9	5.15061e-08	6.39732e-08	0	4.22488e-08	4.23498e-08			Range Kuiper V value of sink samples	0.961				KS D Value	0.152467	0.0599095	0.295533	0.0717665	0.0819548	0.292494	0.0798923	0.231397	0.0679551	0.193955	0.115769	0.0583454	0.0562935	0.1103	0.0603778	0.0885796	0.180261	0.114177	0.0769714	0.0353346	0.0568324	0.146555	0.10143	0.129351	0.0367588	0.054183	0.0378933	0.180719	0.0510063	0.121512	0.326937	0.126148	0.0618477	0.145556	0.0830429	0.0376624
10	5.23586e-08	6.50571e-08	0	4.29559e-08	4.30491e-08			Final Residual	0.183065
11	5.32977e-08	6.62518e-08	0	4.37349e-08	4.38195e-08			Number of Iterations	140
12	5.43238e-08	6.75578e-08	0	4.45863e-08	4.46612e-08
13	5.54372e-08	6.8976e-08	0	4.55106e-08	4.55746e-08
14	5.66384e-08	7.0507e-08	0	4.6508e-08	4.656e-08
15	5.79279e-08	7.21517e-08	0	4.75791e-08	4.76177e-08
16	5.9306e-08	7.39109e-08	0	4.87243e-08	4.87483e-08
17	6.07734e-08	7.57857e-08	0	4.99441e-08	4.9952e-08
18	6.23306e-08	7.77768e-08	0	5.12392e-08	5.12293e-08
19	6.3978e-08	7.98855e-08	0	5.261e-08	5.25807e-08
20	6.57162e-08	8.21127e-08	0	5.4057e-08	5.40066e-08
21	6.75459e-08	8.44595e-08	0	5.5581e-08	5.55075e-08
22	6.94675e-08	8.69271e-08	0	5.71825e-08	5.70838e-08
23	7.14818e-08	8.95167e-08	0	5.88621e-08	5.87361e-08
24	7.35893e-08	9.22295e-08	0	6.06206e-08	6.04648e-08
25	7.57906e-08	9.50669e-08	0	6.24585e-08	6.22705e-08
26	7.80863e-08	9.803e-08	0	6.43765e-08	6.41536e-08
27	8.04772e-08	1.0112e-07	0	6.63754e-08	6.61147e-08
28	8.29638e-08	1.04339e-07	0	6.84558e-08	6.81543e-08
29	8.55467e-08	1.07688e-07	0	7.06185e-08	7.02729e-08
30	8.82265e-08	1.11168e-07	0	7.28641e-08	7.2471e-08
31	9.10039e-08	1.14781e-07	0	7.51934e-08	7.4749e-08
32	9.38795e-08	1.18528e-07	0	7.76071e-08	7.71076e-08
33	9.68539e-08	1.22411e-07	0	8.01059e-08	7.95471e-08
34	9.99276e-08	1.26432e-07	0	8.26906e-08	8.20681e-08
35	1.03101e-07	1.30591e-07	0	8.53618e-08	8.4671e-08
36	1.06375e-07	1.34891e-07	0	8.81203e-08	8.73562e-08
37	1.0975e-07	1.39333e-07	0	9.09668e-08	9.01242e-08
38	1.13227e-07	1.43918e-07	0	9.39021e-08	9.29753e-08
39	1.16806e-07	1.48649e-07	0	9.69267e-08	9.591e-08
40	1.20486e-07	1.53527e-07	0	1.00041e-07	9.89286e-08
41	1.2427e-07	1.58554e-07	0	1.03247e-07	1.02031e-07
42	1.28157e-07	1.63731e-07	0	1.06544e-07	1.05219e-07
43	1.3215e-07	1.69062e-07	0	1.09935e-07	1.08493e-07
44	1.36246e-07	1.74548e-07	0	1.13419e-07	1.11852e-07
45	1.40447e-07	1.8019e-07	0	1.16996e-07	1.15296e-07
46	1.44752e-07	1.85988e-07	0	1.20667e-07	1.18826e-07
47	1.49161e-07	1.91945e-07	0	1.24433e-07	1.22441e-07
48	1.53676e-07	1.98063e-07	0	1.28294e-07	1.26142e-07
49	1.58294e-07	2.04343e-07	0	1.3225e-07	1.29929e-07
50	1.63018e-07	2.10786e-07	0	1.36303e-07	1.33801e-07
51	1.67846e-07	2.17396e-07	0	1.40452e-07	1.37759e-07
52	1.72778e-07	2.24173e-07	0	1.44699e-07	1.41802e-07
53	1.77815e-07	2.31119e-07	0	1.49042e-07	1.45931e-07
54	1.82956e-07	2.38237e-07	0	1.53484e-07	1.50145e-07
55	1.88201e-07	2.45527e-07	0	1.58024e-07	1.54445e-07
56	1.9355e-07	2.52992e-07	0	1.62663e-07	1.58829e-07
57	1.99002e-07	2.60634e-07	0	1.67401e-07	1.63297e-07
58	2.04556e-07	2.68454e-07	0	1.72238e-07	1.67849e-07
59	2.10213e-07	2.76455e-07	0	1.77174e-07	1.72485e-07
60	2.15971e-07	2.84638e-07	0	1.82211e-07	1.77205e-07
61	2.21831e-07	2.93006e-07	0	1.87348e-07	1.82007e-07
62	2.2779e-07	3.0156e-07	0	1.92585e-07	1.86891e-07
63	2.33849e-07	3.10303e-07	0	1.97923e-07	1.91856e-07
64	2.40006e-07	3.19237e-07	0	2.03361e-07	1.96903e-07
65	2.46261e-07	3.28365e-07	0	2.08901e-07	2.02029e-07
66	2.52613e-07	3.37689e-07	0	2.14542e-07	2.07235e-07
67	2.5906e-07	3.47211e-07	0	2.20284e-07	2.12519e-07
68	2.65602e-07	3.56934e-07	0	2.26127e-07	2.17882e-07
69	2.72237e-07	3.66861e-07	0	2.32073e-07	2.23321e-07
70	2.78964e-07	3.76995e-07	0	2.3812e-07	2.28836e-07
71	2.85781e-07	3.8734e-07	0	2.4427e-07	2.34426e-07
72	2.92688e-07	3.97898e-07	0	2.50522e-07	2.4009e-07
73	2.99683e-07	4.08674e-07	0	2.56877e-07	2.45828e-07
74	3.06763e-07	4.19671e-07	0	2.63335e-07	2.51638e-07
75	3.13929e-07	4.30893e-07	0	2.69896e-07	2.57518e-07
76	3.21177e-07	4.42346e-07	0	2.76561e-07	2.63469e-07
77	3.28507e-07	4.54033e-07	0	2.8333e-07	2.69489e-07
78	3.35917e-07	4.65961e-07	0	2.90204e-07	2.75578e-07
79	3.43404e-07	4.78134e-07	0	2.97184e-07	2.81733e-07
80	3.50967e-07	4.9056e-07	0	3.0427e-07	2.87955e-07
81	3.58604e-07	5.03244e-07	0	3.11463e-07	2.94241e-07
82	3.66314e-07	5.16194e-07	0	3.18765e-07	3.00592e-07
83	3.74093e-07	5.29417e-07	0	3.26175e-07	3.07007e-07
84	3.8194e-07	5.42923e-07	0	3.33697e-07	3.13484e-07
85	3.89854e-07	5.56726e-07	0	3.41332e-07	3.20023e-07
86	3.97833e-07	5.70832e-07	0	3.49082e-07	3.26625e-07
87	4.05872e-07	5.8525e-07	0	3.56948e-07	3.33287e-07
88	4.13971e-07	5.99993e-07	0	3.64932e-07	3.40008e-07
89	4.22127e-07	6.15073e-07	0	3.73036e-07	3.4679e-07
90	4.30338e-07	6.30503e-07	0	3.81263e-07	3.53631e-07
91	4.38602e-07	6.46299e-07	0	3.89616e-07	3.60531e-07
92	4.46915e-07	6.62476e-07	0	3.98099e-07	3.6749e-07
93	4.55277e-07	6.79052e-07	0	4.06714e-07	3.74509e-07
94	4.63684e-07	6.96046e-07	0	4.15467e-07	3.81587e-07
95	4.72134e-07	7.13476e-07	0	4.24361e-07	3.88726e-07
96	4.80626e-07	7.31365e-07	0	4.33402e-07	3.95926e-07
97	4.89156e-07	7.49735e-07	0	4.42594e-07	4.03188e-07
98	4.97722e-07	7.6861e-07	0	4.51943e-07	4.10513e-07
99	5.06322e-07	7.88018e-07	0	4.61456e-07	4.17902e-07
100	5.14954e-07	8.07986e-07	0	4.7114e-07	4.25359e-07
101	5.23615e-07	8.28543e-07	0	4.81001e-07	4.32883e-07
102	5.32303e-07	8.49722e-07	0	4.91047e-07	4.40478e-07
103	5.41016e-07	8.71556e-07	0	5.01287e-07	4.48147e-07
104	5.49752e-07	8.94081e-07	0	5.1173e-07	4.55891e-07
105	5.58509e-07	9.17333e-07	0	5.22386e-07	4.63716e-07
106	5.67284e-07	9.41354e-07	0	5.33264e-07	4.71623e-07
107	5.76076e-07	9.66185e-07	0	5.44375e-07	4.79617e-07
108	5.84883e-07	9.91869e-07	0	5.55732e-07	4.87702e-07
109	5.93703e-07	1.01845e-06	0	5.67346e-07	4.95883e-07
110	6.02534e-07	1.04598e-06	0	5.7923e-07	5.04166e-07
111	6.11376e-07	1.07452e-06	0	5.91397e-07	5.12555e-07
112	6.20226e-07	1.1041e-06	0	6.03862e-07	5.21057e-07
113	6.29083e-07	1.13478e-06	0	6.1664e-07	5.29677e-07
114	6.37947e-07	1.16663e-06	0	6.29745e-07	5.38423e-07
115	6.46817e-07	1.1997e-06	0	6.43193e-07	5.47301e-07
116	6.55691e-07	1.23405e-06	0	6.57002e-07	5.56319e-07
117	6.64571e-07	1.26974e-06	0	6.71189e-07	5.65486e-07
118	6.73456e-07	1.30683e-06	0	6.8577e-07	5.74809e-07
119	6.82345e-07	1.3454e-06	0	7.00764e-07	5.84297e-07
120	6.91241e-07	1.3855e-06	0	7.1619e-07	5.93958e-07
121	7.00143e-07	1.4272e-06	0	7.32066e-07	6.03804e-07
122	7.09054e-07	1.47057e-06	0	7.48412e-07	6.13843e-07
123	7.17975e-07	1.51568e-06	0	7.65247e-07	6.24085e-07
124	7.26909e-07	1.5626e-06	0	7.8259e-07	6.34542e-07
125	7.35859e-07	1.61139e-06	0	8.00462e-07	6.45223e-07
126	7.44827e-07	1.66212e-06	0	8.18881e-07	6.5614e-07
127	7.53819e-07	1.71489e-06	0	8.37877e-07	6.67308e-07
128	7.6284e-07	1.76975e-06	0	8.57465e-07	6.78737e-07
129	7.71894e-07	1.82676e-06	0	8.77659e-07	6.90437e-07
130	7.80988e-07	1.88597e-06	0	8.98479e-07	7.02419e-07
131	7.90128e-07	1.94744e-06	0	9.19943e-07	7.14696e-07
132	7.99324e-07	2.01124e-06	0	9.42068e-07	7.2728e-07
133	8.08584e-07	2.07741e-06	0	9.64871e-07	7.40182e-07
134	8.17917e-07	2.14601e-06	0	9.88368e-07	7.53416e-07
135	8.27334e-07	2.21708e-06	0	1.01257e-06	7.66993e-07
136	8.36847e-07	2.29068e-06	0	1.0375e-06	7.80925e-07
137	8.46469e-07	2.36683e-06	0	1.06317e-06	7.95224e-07
138	8.56215e-07	2.44556e-06	0	1.08959e-06	8.09903e-07
139	8.66099e-07	2.52692e-06	0	1.11676e-06	8.24973e-07
140	8.76138e-07	2.61092e-06	0	1.1447e-06	8.40446e-07
141	8.8635e-07	2.69757e-06	0	1.17341e-06	8.56333e-07
142	8.96754e-07	2.78689e-06	0	1.2029e-06	8.72646e-07
143	9.07372e-07	2.87887e-06	0	1.23318e-06	8.89396e-07
144	9.18225e-07	2.97352e-06	0	1.26424e-06	9.06593e-07
145	9.29336e-07	3.07083e-06	0	1.29609e-06	9.24248e-07
146	9.40732e-07	3.17077e-06	0	1.32873e-06	9.42372e-07
147	9.52439e-07	3.27333e-06	0	1.36214e-06	9.60975e-07
148	9.64485e-07	3.37846e-06	0	1.39633e-06	9.80067e-07
149	9.769e-07	3.48613e-06	0	1.4313e-06	9.99657e-07
150	9.89717e-07	3.59629e-06	0	1.46702e-06	1.01975e-06
151	1.00297e-06	3.70889e-06	0	1.50349e-06	1.04037e-06
152	1.01669e-06	3.82387e-06	0	1.54069e-06	1.06151e-06
153	1.03092e-06	3.94116e-06	0	1.57862e-06	1.08319e-06
154	1.04569e-06	4.06069e-06	0	1.61726e-06	1.10541e-06
155	1.06105e-06	4.18237e-06	0	1.65658e-06	1.12819e-06
156	1.07703e-06	4.30613e-06	0	1.69658e-06	1.15153e-06
157	1.09369e-06	4.43188e-06	0	1.73723e-06	1.17544e-06
158	1.11106e-06	4.55951e-06	0	1.77851e-06	1.19993e-06
159	1.12921e-06	4.68894e-06	0	1.82039e-06	1.22502e-06
160	1.14816e-06	4.82007e-06	0	1.86287e-06	1.25071e-06
161	1.16798e-06	4.95278e-06	0	1.9059e-06	1.27702e-06
162	1.18872e-06	5.08699e-06	0	1.94948e-06	1.30394e-06
163	1.21043e-06	5.22259e-06	0	1.99358e-06	1.33151e-06
164	1.23317e-06	5.35947e-06	0	2.03817e-06	1.35973e-06
165	1.257e-06	5.49754e-06	0	2.08323e-06	1.38861e-06
166	1.28198e-06	5.6367e-06	0	2.12875e-06	1.41818e-06
167	1.30817e-06	5.77685e-06	0	2.1747e-06	1.44843e-06
168	1.33563e-06	5.9179e-06	0	2.22106e-06	1.47941e-06
169	1.36445e-06	6.05978e-06	0	2.26782e-06	1.51113e-06
170	1.39469e-06	6.20241e-06	0	2.31497e-06	1.54361e-06
171	1.42641e-06	6.3457e-06	0	2.36248e-06	1.57687e-06
172	1.45967e-06	6.48961e-06	0	2.41035e-06	1.61093e-06
173	1.49456e-06	6.63407e-06	0	2.45858e-06	1.64582e-06
174	1.53114e-06	6.77905e-06	0	2.50715e-06	1.68157e-06
175	1.5695e-06	6.92451e-06	0	2.55609e-06	1.71821e-06
176	1.6097e-06	7.07045e-06	0	2.6054e-06	1.75576e-06
177	1.65184e-06	7.21685e-06	0	2.65512e-06	1.79428e-06
178	1.69598e-06	7.36373e-06	0	2.70533e-06	1.83378e-06
179	1.74221e-06	7.51108e-06	0	2.75616e-06	1.8743e-06
180	1.79061e-06	7.65893e-06	0	2.80784e-06	1.91588e-06
181	1.84125e-06	7.80731e-06	0	2.86077e-06	1.95853e-06
182	1.8942e-06	7.9562e-06	0	2.91564e-06	2.00228e-06
183	1.94949e-06	8.10559e-06	0	2.97359e-06	2.04709e-06
184	2.00715e-06	8.25539e-06	0	3.03646e-06	2.09292e-06
185	2.06715e-06	8.40542e-06	0	3.10719e-06	2.13966e-06
186	2.12939e-06	8.55536e-06	0	3.19029e-06	2.18708e-06
187	2.19367e-06	8.70466e-06	0	3.29252e-06	2.23486e-06
188	2.25967e-06	8.85248e-06	0	3.42372e-06	2.28246e-06
189	2.32686e-06	8.99758e-06	0	3.59774e-06	2.32911e-06
190	2.39451e-06	9.13821e-06	0	3.83349e-06	2.37374e-06
191	2.46162e-06	9.27201e-06	0	4.15585e-06	2.41493e-06
192	2.52687e-06	9.39596e-06	0	4.59637e-06	2.45083e-06
193	2.58866e-06	9.50631e-06	0	5.19343e-06	2.4792e-06
194	2.6451e-06	9.59872e-06	0	5.99153e-06	2.49744e-06
195	2.69416e-06	9.66839e-06	0	7.03945e-06	2.50267e-06
196	2.73374e-06	9.7104e-06	0	8.38712e-06	2.49199e-06
197	2.76197e-06	9.72018e-06	0	1.00808e-05	2.46271e-06
198	2.77744e-06	9.69414e-06	0	1.21572e-05	2.41278e-06
199	2.7796e-06	9.63039e-06	0	1.46363e-05	2.34117e-06
200	2.76903e-06	9.52944e-06	0	1.75142e-05	2.24835e-06
201	2.74781e-06	9.3949e-06	0	2.07564e-05	2.13671e-06
202	2.71972e-06	9.23392e-06	0	2.42936e-05	2.0108e-06
203	2.69031e-06	9.05735e-06	0	2.80202e-05	1.87746e-06
204	2.66678e-06	8.87941e-06	0	3.17965e-05	1.74563e-06
205	2.65769e-06	8.71703e-06	0	3.54561e-05	1.62597e-06
206	2.6724e-06	8.58862e-06	0	3.88174e-05	1.53011e-06
207	2.72042e-06	8.51257e-06	0	4.1698e-05	1.46978e-06
208	2.81059e-06	8.50551e-06	0	4.39318e-05	1.45578e-06
209	2.95039e-06	8.58066e-06	0	4.53848e-05	1.49698e-06
210	3.14521e-06	8.74633e-06	0	4.59697e-05	1.59946e-06
211	3.39861e-06	9.00597e-06	0	4.56456e-05	1.76662e-06
212	3.71085e-06	9.35563e-06	0	4.44421e-05	1.99751e-06
213	4.07885e-06	9.78421e-06	0	4.24575e-05	2.28691e-06
214	4.49815e-06	1.02768e-05	0	3.98263e-05	2.62752e-06
215	4.96288e-06	1.0815e-05	0	3.67155e-05	3.01011e-06
216	5.4665e-06	1.13787e-05	0	3.33088e-05	3.42449e-06
217	6.00256e-06	1.19477e-05	0	2.97896e-05	3.86051e-06
218	6.5654e-06	1.25032e-05	0	2.63259e-05	4.30899e-06
219	7.15062e-06	1.30292e-05	0	2.30595e-05	4.76242e-06
220	7.75542e-06	1.35133e-05	0	2.00982e-05	5.21533e-06
221	8.37867e-06	1.39465e-05	0	1.75133e-05	5.6645e-06
222	9.02081e-06	1.43239e-05	0	1.53409e-05	6.10879e-06
223	9.68357e-06	1.46436e-05	0	1.35869e-05	6.54891e-06
224	1.03697e-05	1.49065e-05	0	1.22327e-05	6.98691e-06
225	1.10824e-05	1.51153e-05	0	1.1243e-05	7.42577e-06
226	1.18252e-05	1.5274e-05	0	1.0573e-05	7.86891e-06
227	1.26013e-05	1.53873e-05	0	1.01741e-05	8.31977e-06
228	1.34137e-05	1.54601e-05	0	9.99958e-06	8.7815e-06
229	1.42645e-05	1.54973e-05	0	1.00077e-05	9.25669e-06
230	1.51551e-05	1.55032e-05	0	1.01641e-05	9.74723e-06
231	1.6086e-05	1.54819e-05	0	1.04434e-05	1.02542e-05
232	1.70568e-05	1.54369e-05	0	1.08297e-05	1.07778e-05
233	1.80662e-05	1.53712e-05	0	1.13167e-05	1.13174e-05
234	1.91118e-05	1.52872e-05	0	1.19083e-05	1.18715e-05
235	2.01904e-05	1.5187e-05	0	1.26179e-05	1.24375e-05
236	2.12977e-05	1.50719e-05	0	1.34688e-05	1.30124e-05
237	2.24289e-05	1.49427e-05	0	1.44927e-05	1.35921e-05
238	2.35783e-05	1.48e-05	0	1.57291e-05	1.41719e-05
239	2.47398e-05	1.46437e-05	0	1.72225e-05	1.47467e-05
240	2.5907e-05	1.44741e-05	0	1.90191e-05	1.53114e-05
241	2.70738e-05	1.42917e-05	0	2.11615e-05	1.58608e-05
242	2.82343e-05	1.4098e-05	0	2.36827e-05	1.63903e-05
243	2.93836e-05	1.38963e-05	0	2.65989e-05	1.68967e-05
244	3.05184e-05	1.36918e-05	0	2.99023e-05	1.73782e-05
245	3.16368e-05	1.34927e-05	0	3.35546e-05	1.78351e-05
246	3.27392e-05	1.33105e-05	0	3.74825e-05	1.827e-05
247	3.38282e-05	1.31597e-05	0	4.15764e-05	1.86882e-05
248	3.49084e-05	1.30577e-05	0	4.56934e-05	1.90973e-05
249	3.59863e-05	1.30241e-05	0	4.96644e-05	1.95069e-05
250	3.707e-05	1.30792e-05	0	5.33054e-05	1.99276e-05
251	3.81678e-05	1.32429e-05	0	5.64329e-05	2.03709e-05
252	3.92883e-05	1.35324e-05	0	5.88804e-05	2.0847e-05
253	4.04392e-05	1.39621e-05	0	6.05071e-05	2.13654e-05
254	4.16268e-05	1.45408e-05	0	6.12208e-05	2.19327e-05
255	4.28543e-05	1.52676e-05	0	6.10072e-05	2.2551e-05
256	4.41231e-05	1.61369e-05	0	5.99e-05	2.32201e-05
257	4.54322e-05	1.71371e-05	0	5.79886e-05	2.39361e-05
258	4.67789e-05	1.82513e-05	0	5.54087e-05	2.46926e-05
259	4.81591e-05	1.94595e-05	0	5.23281e-05	2.54816e-05
260	4.95683e-05	2.07395e-05	0	4.89303e-05	2.62938e-05
261	5.10019e-05	2.20692e-05	0	4.5398e-05	2.71203e-05
262	5.2456e-05	2.34284e-05	0	4.18981e-05	2.79529e-05
263	5.39279e-05	2.47993e-05	0	3.85707e-05	2.87854e-05
264	5.54165e-05	2.61679e-05	0	3.55216e-05	2.96133e-05
265	5.6922e-05	2.75241e-05	0	3.28202e-05	3.04344e-05
266	5.84462e-05	2.88615e-05	0	3.05009e-05	3.12485e-05
267	5.99921e-05	3.01769e-05	0	2.85674e-05	3.20574e-05
268	6.15637e-05	3.14699e-05	0	2.69999e-05	3.2864e-05
269	6.31653e-05	3.27417e-05	0	2.57615e-05	3.36725e-05
270	6.48019e-05	3.39948e-05	0	2.48059e-05	3.44873e-05
271	6.64783e-05	3.52321e-05	0	2.40832e-05	3.53132e-05
272	6.8199e-05	3.64565e-05	0	2.35444e-05	3.61549e-05
273	6.99685e-05	3.76705e-05	0	2.31453e-05	3.70169e-05
274	7.17907e-05	3.88761e-05	0	2.28477e-05	3.79031e-05
275	7.36693e-05	4.00746e-05	0	2.26204e-05	3.88172e-05
276	7.56074e-05	4.12664e-05	0	2.24396e-05	3.97625e-05
277	7.7608e-05	4.24516e-05	0	2.22879e-05	4.07418e-05
278	7.96734e-05	4.36298e-05	0	2.21542e-05	4.17577e-05
279	8.18057e-05	4.47999e-05	0	2.20329e-05	4.28122e-05
280	8.40065e-05	4.59606e-05	0	2.19241e-05	4.39073e-05
281	8.62772e-05	4.71104e-05	0	2.1833e-05	4.50443e-05
282	8.86184e-05	4.82473e-05	0	2.17706e-05	4.62241e-05
283	9.10301e-05	4.93693e-05	0	2.17542e-05	4.74472e-05
284	9.35119e-05	5.04739e-05	0	2.18077e-05	4.87135e-05
285	9.60624e-05	5.15585e-05	0	2.19623e-05	5.00221e-05
286	9.86795e-05	5.26202e-05	0	2.22561e-05	5.13716e-05
287	0.00010136	5.3656e-05	0	2.2733e-05	5.27596e-05
288	0.000104102	5.46633e-05	0	2.34411e-05	5.41837e-05
289	0.0001069	5.56396e-05	0	2.44288e-05	5.56405e-05
290	0.000109749	5.65837e-05	0	2.57399e-05	5.71269e-05
291	0.000112647	5.74959e-05	0	2.74075e-05	5.86401e-05
292	0.00011559	5.83787e-05	0	2.94467e-05	6.01779e-05
293	0.000118574	5.92373e-05	0	3.18476e-05	6.17392e-05
294	0.000121599	6.00808e-05	0	3.45691e-05	6.33248e-05
295	0.000124664	6.09215e-05	0	3.75357e-05	6.49372e-05
296	0.000127771	6.17765e-05	0	4.06326e-05	6.65814e-05
297	0.000130924	6.26652e-05	0	4.37094e-05	6.82632e-05
298	0.000134128	6.3609e-05	0	4.65971e-05	6.999e-05
299	0.000137387	6.46302e-05	0	4.91162e-05	7.17697e-05
300	0.000140707	6.57495e-05	0	5.10927e-05	7.36099e-05
301	0.000144094	6.69849e-05	0	5.23757e-05	7.55164e-05
302	0.000147551	6.83491e-05	0	5.28536e-05	7.74927e-05
303	0.000151081	6.98486e-05	0	5.24669e-05	7.95392e-05
304	0.000154682	7.14827e-05	0	5.1217e-05	8.16522e-05
305	0.000158353	7.32426e-05	0	4.91679e-05	8.38246e-05
306	0.00016209	7.51127e-05	0	4.64418e-05	8.60454e-05
307	0.000165885	7.7071e-05	0	4.32084e-05	8.83007e-05
308	0.000169733	7.90908e-05	0	3.96699e-05	9.05748e-05
309	0.000173625	8.11428e-05	0	3.6044e-05	9.2851e-05
310	0.000177556	8.31968e-05	0	3.25449e-05	9.51126e-05
311	0.000181519	8.52234e-05	0	2.93682e-05	9.73444e-05
312	0.000185512	8.71961e-05	0	2.66773e-05	9.95329e-05
313	0.000189531	8.90918e-05	0	2.45948e-05	0.000101667
314	0.000193576	9.08919e-05	0	2.31983e-05	0.000103739
315	0.00019765	9.25826e-05	0	2.25209e-05	0.000105743
316	0.000201735	9.41271e-05	7.25465e-07	2.23274e-05	0.000107615
317	0.000205768	9.54344e-05	4.46729e-06	2.18578e-05	0.00010916
318	0.000209844	9.66175e-05	8.14804e-06	2.20074e-05	0.000110641
319	0.00021397	9.76788e-05	1.17019e-05	2.27108e-05	0.000112064
320	0.000218154	9.86231e-05	1.50532e-05	2.38972e-05	0.00011344
321	0.000222404	9.94554e-05	1.81191e-05	2.5497e-05	0.000114779
322	0.000226727	0.000100181	2.08145e-05	2.74471e-05	0.000116092
323	0.000231132	0.000100803	2.30582e-05	2.96925e-05	0.000117389
324	0.000235624	0.000101323	2.47798e-05	3.21868e-05	0.000118678
325	0.000240211	0.00010174	2.59278e-05	3.4889e-05	0.000119969
326	0.000244898	0.00010205	2.64759e-05	3.7759e-05	0.000121265
327	0.000249691	0.000102247	2.64285e-05	4.07523e-05	0.00012257
328	0.000254597	0.000102322	2.58236e-05	4.38143e-05	0.000123884
329	0.000259621	0.000102265	2.47327e-05	4.68765e-05	0.000125206
330	0.00026477	0.000102065	2.32575e-05	4.98549e-05	0.000126533
331	0.000270049	0.000101711	2.15229e-05	5.26517e-05	0.00012786
332	0.000275465	0.000101196	1.96677e-05	5.5161e-05	0.000129183
333	0.000281024	0.000100509	1.78326e-05	5.72776e-05	0.000130495
334	0.000286732	9.96464e-05	1.61482e-05	5.89079e-05	0.000131792
335	0.000292593	9.86034e-05	1.47227e-05	5.9982e-05	0.00013307
336	0.000298613	9.73783e-05	1.36323e-05	6.04642e-05	0.000134325
337	0.000304794	9.59705e-05	1.29151e-05	6.03587e-05	0.000135554
338	0.000311141	9.43788e-05	1.2571e-05	5.97111e-05	0.000136755
339	0.000317651	9.261e-05	1.25452e-05	5.86294e-05	0.000137926
340	0.000324325	9.06689e-05	1.27558e-05	5.72455e-05	0.000139065
341	0.000331159	8.85623e-05	1.30959e-05	5.5714e-05	0.000140172
342	0.000338152	8.62997e-05	1.34445e-05	5.41973e-05	0.000141244
343	0.000345298	8.38937e-05	1.36787e-05	5.2849e-05	0.000142279
344	0.000352592	8.13614e-05	1.36848e-05	5.1798e-05	0.000143275
345	0.000360026	7.87252e-05	1.33678e-05	5.11351e-05	0.000144228
346	0.00036759	7.60139e-05	1.26579e-05	5.09028e-05	0.000145136
347	0.000375273	7.32634e-05	1.1515e-05	5.10896e-05	0.000145995
348	0.000383059	7.05166e-05	9.92829e-06	5.16293e-05	0.000146804
349	0.000390931	6.78231e-05	7.91506e-06	5.24063e-05	0.00014756
350	0.000398871	6.52373e-05	5.51588e-06	5.32651e-05	0.000148263
351	0.000406857	6.28161e-05	2.789e-06	5.40242e-05	0.000148911
352	0.000414864	6.06081e-05	0	5.44321e-05	0.000149487
353	0.000422793	5.85609e-05	0	5.34392e-05	0.000149752
354	0.000430708	5.68239e-05	0	5.17904e-05	0.000149947
355	0.000438601	5.54296e-05	0	4.93993e-05	0.000150069
356	0.000446465	5.43951e-05	0	4.62318e-05	0.000150115
357	0.000454302	5.37205e-05	0	4.23108e-05	0.000150078
358	0.000462117	5.3389e-05	0	3.77151e-05	0.000149947
359	0.000469921	5.33684e-05	0	3.25715e-05	0.000149709
360	0.000477733	5.36145e-05	0	2.70428e-05	0.000149349
361	0.000485572	5.40745e-05	0	2.13122e-05	0.000148854
362	0.000493464	5.46918e-05	0	1.55663e-05	0.000148214
363	0.000501433	5.541e-05	0	9.9801e-06	0.000147421
364	0.000509508	5.61762e-05	0	4.70409e-06	0.000146474
365	0.000517712	5.69191e-05	0	0	0.000145369
366	0.00052596	5.69133e-05	0	0	0.000143871
367	0.000534408	5.69311e-05	0	0	0.000142283
368	0.000543083	5.69497e-05	0	0	0.000140626
369	0.000552009	5.69476e-05	0	0	0.000138927
370	0.000561208	5.69043e-05	0	0	0.000137212
371	0.000570703	5.67998e-05	0	0	0.000135512
372	0.000580516	5.66146e-05	0	0	0.000133856
373	0.00059067	5.63294e-05	0	0	0.000132276
374	0.000601185	5.59252e-05	0	0	0.000130803
375	0.000612084	5.53832e-05	0	0	0.000129468
376	0.000623387	5.46855e-05	0	0	0.000128301
377	0.000635115	5.38149e-05	0	0	0.00012733
378	0.000647286	5.27559e-05	0	0	0.000126585
379	0.000659918	5.14941e-05	0	0	0.00012609
380	0.000673037	5.00135e-05	0	0	0.000125876
381	0.000686644	4.83095e-05	0	0	0.000125962
382	0.00070075	4.63763e-05	0	0	0.000126367
383	0.000715361	4.42113e-05	0	0	0.00012711
384	0.00073048	4.18158e-05	0	0	0.000128208
385	0.000746104	3.91949e-05	0	0	0.000129673
386	0.000762229	3.63577e-05	0	0	0.000131518
387	0.000778842	3.33177e-05	0	0	0.00013375
388	0.00079593	3.00927e-05	0	0	0.000136376
389	0.00081347	2.67048e-05	0	0	0.000139395
390	0.000831436	2.31805e-05	0	0	0.000142807
391	0.000849796	1.95505e-05	0	0	0.000146605
392	0.000868512	1.58496e-05	0	0	0.000150778
393	0.000887539	1.21165e-05	0	0	0.000155309
394	0.000906828	8.39326e-06	0	0	0.000160178
395	0.000926321	4.72526e-06	0	0	0.000165358
396	0.000945957	1.16036e-06	0	0	0.000170817
397	0.000965004	0	0	0	0.000176469
398	0.000983771	0	0	0	0.000182299
399	0.00100254	0	0	0	0.000188279
400	0.00102124	0	0	0	0.000194356
401	0.0010398	0	0	0	0.000200472
402	0.00105809	0	8.93875e-07	0	0.000206469
403	0.00107555	0	1.02433e-05	0	0.000211485
404	0.00109275	0	1.79761e-05	0	0.000216514
405	0.00110965	0	2.35514e-05	0	0.000221543
406	0.00112618	0	2.66644e-05	0	0.000226535
407	0.00114227	0	2.72918e-05	0	0.000231426
408	0.00115783	0	2.56895e-05	0	0.000236124
409	0.00117276	0	2.2347e-05	0	0.000240517
410	0.00118694	0	1.79062e-05	0	0.000244482
411	0.00120027	0	1.30633e-05	0	0.000247899
412	0.00121265	0	8.47388e-06	0	0.000250659
413	0.00122387	1.33288e-07	4.15616e-06	1.45243e-06	0.000252642
414	0.0012325	4.95399e-06	0	5.29066e-06	0.00025373
415	0.00123976	1.00918e-05	0	8.29835e-06	0.000253951
416	0.00124576	1.56526e-05	0	1.18425e-05	0.000254182
417	0.00125047	2.1582e-05	0	1.59665e-05	0.000255849
418	0.00125383	2.78219e-05	0	2.06722e-05	0.000262072
419	0.00125577	3.4312e-05	0	2.59031e-05	0.000278286
420	0.0012562	4.09903e-05	0	3.15565e-05	0.000311512
421	0.00125506	4.7791e-05	0	3.75607e-05	0.000366922
422	0.00125242	5.46393e-05	0	4.40267e-05	0.000442118
423	0.00124862	6.14465e-05	0	5.13242e-05	0.00052116
424	0.00124413	6.8122e-05	0	6.00135e-05	0.000579223
425	0.0012394	7.45848e-05	0	7.05488e-05	0.000593536
426	0.00123464	8.07809e-05	0	8.29531e-05	0.000556348
427	0.00122971	8.66889e-05	0	9.67038e-05	0.000479614
428	0.0012243	9.23112e-05	0	0.000110926	0.000387616
429	0.0012181	9.76582e-05	0	0.000124739	0.000303645
430	0.00121098	0.000102735	0	0.000137508	0.000240552
431	0.001203	0.00010754	0	0.000148885	0.00019987
432	0.00119431	0.000112067	0	0.000158694	0.000177007
433	0.00118505	0.000116312	0	0.000166799	0.000167338
434	0.00117531	0.000120273	0	0.000173016	0.000169931
435	0.00116508	0.000123954	0	0.000177101	0.000188163
436	0.00115434	0.000127358	0	0.000178817	0.000227241
437	0.0011431	0.000130483	0	0.000178056	0.000288936
438	0.00113154	0.000133311	0	0.000174984	0.000365642
439	0.00112	0.000135813	0	0.000170086	0.000438333
440	0.00110892	0.000137948	0	0.000164017	0.000482453
441	0.00109864	0.000139683	0	0.000157294	0.000480152
442	0.00108918	0.000141002	0	0.000150048	0.000430714
443	0.00108028	0.000141908	0	0.000142014	0.000350987
444	0.00107154	0.00014241	0	0.000132788	0.000265457
445	0.00106266	0.000142509	0	0.000122141	0.000193807
446	0.00105348	0.000142193	0	0.000110185	0.000144366
447	0.00104402	0.000141437	0	9.73271e-05	0.000115462
448	0.00103439	0.000140217	0	8.41255e-05	0.000100793
449	0.00102465	0.000138513	0	7.11457e-05	9.40889e-05
450	0.00101486	0.000136319	0	5.88851e-05	9.11286e-05
451	0.00100502	0.000133644	0	4.77435e-05	8.97051e-05
452	0.000995123	0.000130513	0	3.80156e-05	8.88749e-05
453	0.000985136	0.00012697	0	2.98866e-05	8.82964e-05
454	0.000975033	0.000123075	0	2.34307e-05	8.78629e-05
455	0.000964787	0.0001189	0	1.86137e-05	8.75544e-05
456	0.000954377	0.000114526	0	1.53047e-05	8.74115e-05
457	0.000943783	0.00011004	0	1.32923e-05	8.76085e-05
458	0.000932988	0.000105527	0	1.23042e-05	8.86911e-05
459	0.000921968	0.000101064	0	1.20218e-05	9.20922e-05
460	0.000910676	9.67212e-05	0	1.20867e-05	0.000100929
461	0.000899036	9.25547e-05	0	1.21085e-05	0.000120623
462	0.000886953	8.86074e-05	0	1.16999e-05	0.000158169
463	0.000874364	8.49047e-05	0	1.05732e-05	0.000218713
464	0.000861333	8.14541e-05	0	8.68011e-06	0.00029983
465	0.000848155	7.82293e-05	0	6.37379e-06	0.000385622
466	0.000835268	7.51903e-05	0	4.2794e-06	0.000451147
467	0.000823075	7.22978e-05	0	3.00661e-06	0.000473533
468	0.000811723	6.9531e-05	0	2.81609e-06	0.00044492
469	0.00080103	6.68957e-05	0	3.48897e-06	0.000377224
470	0.0007906	6.44166e-05	0	4.49642e-06	0.000294904
471	0.00078004	6.21234e-05	0	5.31535e-06	0.000221958
472	0.000769112	6.00395e-05	0	5.64432e-06	0.000173039
473	0.000757734	5.81808e-05	0	5.40701e-06	0.000153215
474	0.000745897	5.65599e-05	0	4.62629e-06	0.000163047
475	0.000733606	5.51886e-05	0	3.33207e-06	0.000202413
476	0.000720897	5.40746e-05	0	1.60041e-06	0.00026913
477	0.000707919	5.31607e-05	0	0	0.000353902
478	0.000694966	5.22641e-05	0	0	0.000437499
479	0.000682505	5.17328e-05	0	0	0.000496008
480	0.000670829	5.16177e-05	0	0	0.000512812
481	0.000659897	5.1844e-05	0	3.77709e-07	0.000490099
482	0.000649274	5.19454e-05	0	3.44075e-06	0.000449917
483	0.000638508	5.22415e-05	0	6.68051e-06	0.000423025
484	0.00062725	5.2737e-05	0	9.59208e-06	0.000431155
485	0.000615507	5.3411e-05	0	1.21918e-05	0.000474698
486	0.000603641	5.42176e-05	0	1.50211e-05	0.00053257
487	0.00059217	5.51015e-05	0	1.88426e-05	0.000574559
488	0.000581463	5.60187e-05	0	2.42035e-05	0.000579123
489	0.000571539	5.69513e-05	0	3.11307e-05	0.000545991
490	0.000561977	5.77964e-05	2.97378e-06	3.82113e-05	0.000495811
491	0.000552102	5.83434e-05	1.51021e-05	4.28212e-05	0.000458393
492	0.000541785	5.89497e-05	2.7193e-05	4.73367e-05	0.000458806
493	0.000530911	5.96078e-05	3.92939e-05	5.17097e-05	0.000504055
494	0.00051968	6.0255e-05	5.22949e-05	5.61762e-05	0.000580689
495	0.000508509	6.07877e-05	6.77133e-05	6.11832e-05	0.000660518
496	0.000497843	6.10941e-05	8.72036e-05	6.72195e-05	0.000713614
497	0.000487914	6.10928e-05	0.000111997	7.46216e-05	0.000723221
498	0.000478617	6.07538e-05	0.000142585	8.34653e-05	0.000694181
499	0.000469557	6.00906e-05	0.000178829	9.36067e-05	0.000649725
500	0.000460223	5.91329e-05	0.00022037	0.000104827	0.000620289
501	0.000450144	5.79024e-05	0.000266957	0.000116955	0.000633661
502	0.000438936	5.64084e-05	0.000318503	0.000129891	0.000712108
503	0.000426293	5.46532e-05	0.000374978	0.000143578	0.000873273
504	0.00041204	5.26283e-05	0.000436423	0.000158023	0.00112716
505	0.000396289	5.02945e-05	0.000503225	0.000173393	0.00146653
506	0.000379576	4.75541e-05	0.000576481	0.000190146	0.00185819
507	0.000362831	4.42853e-05	0.000657463	0.000208883	0.0022459
508	0.000346904	4.04016e-05	0.000746789	0.000230022	0.00258026
509	0.000332092	3.59278e-05	0.000843323	0.000253408	0.0028493
510	0.0003179	3.10385e-05	0.000943652	0.000278122	0.00309353
511	0.000303255	2.6017e-05	0.00104275	0.000302695	0.00339153
512	0.000287057	2.11577e-05	0.00113547	0.000325608	0.00382374
513	0.000268704	1.66733e-05	0.00121794	0.000345771	0.00443789
514	0.000248275	1.26603e-05	0.00128815	0.000362699	0.00523671
515	0.000226276	9.13954e-06	0.00134531	0.000376301	0.00619453
516	0.000203057	6.1527e-06	0.00138847	0.000386387	0.00729474
517	0.000178228	3.86081e-06	0.00141502	0.000392152	0.00856796
518	0.000150508	2.5721e-06	0.00142026	0.000392034	0.0101021
519	0.000118312	2.64678e-06	0.00139877	0.000384192	0.0120047
520	8.08659e-05	4.31272e-06	0.00134707	0.000367453	0.0143309
521	3.90839e-05	7.51763e-06	0.00126584	0.000342064	0.0170263
522	0	7.82112e-06	0.0011584	0.000308911	0.019934
523	0	0	0.00101563	0.000250303	0.0228604
524	0	0	0.000857004	0.000185565	0.0257069
525	0	0	0.000684571	0.000119177	0.0284666
526	0	0	0.000496128	4.97644e-05	0.0312025
527	0	0	0.000281436	0	0.0339712
528	0	0	3.21596e-05	0	0.0367545
529	0	0	0	0	0.0393933
530	0	0	0	0	0.0416741
531	0	0	0	0	0.0433062
532	0	0	0	0	0.0440358
533	0	0	0	0	0.0437349
534	0	0	0	0	0.0424131
535	0	0	0	0	0.0401639
536	0	0	0	0	0.0371176
537	0	0	0	0	0.0334534
538	0	0	0	0	0.0294348
539	2.7823e-05	0	0	0	0.0253784
540	9.81949e-05	0	0	0	0.0215938
541	0.000159258	0	0	0	0.0183189
542	0.00020988	0	0	0	0.0156163
543	0.000251244	0	0	0	0.0134216
544	0.000285865	0	0	0	0.0115971
545	0.000316034	1.6983e-06	0	0	0.00998994
546	0.000344118	4.36841e-06	0	0	0.0084825
547	0.000371228	7.31775e-06	0	0	0.00702534
548	0.00039688	1.03931e-05	0	0	0.00564793
549	0.000418922	9.09846e-06	0	2.46263e-05	0.00443557
550	0.000436518	8.09223e-06	0	4.43573e-05	0.0034858
551	0.000448769	7.43802e-06	0	5.76162e-05	0.00285364
552	0.000456056	7.11364e-06	0	6.47764e-05	0.00251687
553	0.000459995	7.01739e-06	0	6.80703e-05	0.00237845
554	0.000462722	7.01657e-06	0	7.05043e-05	0.00231009
555	0.000465897	7.0139e-06	0	7.43715e-05	0.00221205
556	0.00047007	6.98809e-06	0	8.03077e-05	0.00205149
557	0.000474781	6.98296e-06	0	8.74502e-05	0.00185654
558	0.000479227	7.05751e-06	0	9.44465e-05	0.00167628
559	0.000482951	7.23521e-06	0	0.000100497	0.00153916
560	0.000486092	7.48548e-06	0	0.000105737	0.00143788
561	0.000489135	7.74194e-06	0	0.000110849	0.00134457
562	0.000492457	7.93636e-06	0	0.000116376	0.00123822
563	0.000496063	8.02007e-06	0	0.000122315	0.00112026
564	0.000499699	7.96007e-06	0	0.000128279	0.00100767
565	0.00050318	7.72063e-06	0	0.000133968	0.000913396
566	0.00050659	7.25301e-06	0	0.000139467	0.000834039
567	0.000510193	6.50508e-06	0	0.000145103	0.000755106
568	0.00051418	5.44154e-06	0	0.000151068	0.000666225
569	0.00051851	4.05655e-06	0	0.000157172	0.00057064
570	0.000522965	2.37046e-06	0	0.000162939	0.000481927
571	0.000527314	4.17634e-07	0	0.000167853	0.000413983
572	0.000530965	0	0	0.000170787	0.000374359
573	0.000534183	0	0	0.000172002	0.00036474
574	0.000537077	0	0	0.000171511	0.000384936
575	0.000539652	0	0	0.000169182	0.000434399
576	0.00054197	0	0	0.000165004	0.000508883
577	0.000544237	0	0	0.000159225	0.000595283
578	0.000546812	0	0	0.00015238	0.000670912
579	0.000550087	0	0	0.000145105	0.000711123
580	0.000554281	0	0	0.000137827	0.000701904
581	0.000559302	0	0	0.000130561	0.000648141
582	0.000564803	0	0	0.000122965	0.000570617
583	0.000570368	0	0	0.000114626	0.000494047
584	0.000575711	0	0	0.000105329	0.000435354
585	0.00058074	0	0	9.51468e-05	0.000399444
586	0.000585506	0	0	8.43527e-05	0.000382432
587	0.000590105	0	0	7.32707e-05	0.000377431
588	0.000594617	0	0	6.2175e-05	0.000378599
589	0.000599081	0	0	5.12602e-05	0.000382384
590	0.000603501	0	0	4.06603e-05	0.000387099
591	0.000607864	0	0	3.04657e-05	0.00039207
592	0.000612145	0	0	2.07392e-05	0.000397077
593	0.000616317	0	0	1.15363e-05	0.000402042
594	0.000620347	0	0	2.90596e-06	0.000406929
595	0.000623811	0	0	0	0.000411381
596	0.000626896	0	0	0	0.000415548
597	0.000629796	0	0	0	0.000419582
598	0.000632482	0	0	0	0.00042345
599	0.000634924	0	0	0	0.000427115
600	0.000637095	0	0	0	0.00043054
601	0.000638966	0	0	0	0.000433685
602	0.000640513	0	0	0	0.000436511
603	0.00064171	0	0	0	0.000438981
604	0.000642537	0	0	0	0.000441058
605	0.000642974	0	0	0	0.000442707
606	0.000643003	0	0	0	0.000443897
607	0.000642611	0	0	0	0.000444601
608	0.000641785	0	0	0	0.000444796
609	0.000640517	0	0	0	0.000444467
610	0.000638802	0	0	0	0.000443601
611	0.000636637	0	0	0	0.000442194
612	0.000634023	0	0	0	0.000440246
613	0.000630965	0	0	0	0.000437766
614	0.000627467	0	0	0	0.000434766
615	0.000623542	0	0	0	0.000431266
616	0.000619201	0	0	0	0.00042729
617	0.000614459	0	0	0	0.000422867
618	0.000609333	0	0	0	0.000418031
619	0.000603843	0	0	0	0.000412817
620	0.000598009	0	0	0	0.000407264
621	0.000591855	0	0	0	0.000401413
622	0.000585403	0	0	0	0.000395303
623	0.000578678	0	0	0	0.000388976
624	0.000571704	0	0	0	0.000382471
625	0.000564506	0	0	0	0.000375828
626	0.000557107	0	0	0	0.000369082
627	0.000549531	0	0	0	0.000362267
628	0.000541801	0	0	0	0.000355413
629	0.000533937	0	0	0	0.000348548
630	0.000525959	0	0	0	0.000341694
631	0.000517884	0	0	0	0.000334872
632	0.000509728	0	0	0	0.000328099
633	0.000501506	0	0	0	0.000321385
634	0.000493231	0	0	0	0.00031474
635	0.000484913	0	0	0	0.000308167
636	0.000476561	0	0	0	0.000301668
637	0.000468183	0	0	0	0.000295242
638	0.000459786	0	0	0	0.000288885
639	0.000451373	0	0	0	0.000282593
640	0.000442951	0	0	0	0.000276358
641	0.000434524	0	0	0	0.000270173
642	0.000426095	0	0	0	0.000264031
643	0.000417668	0	0	0	0.000257923
644	0.000409249	0	0	0	0.000251841
645	0.000400842	0	0	0	0.000245781
646	0.000392453	0	0	0	0.000239736
647	0.000384088	0	0	0	0.000233703
648	0.000375754	0	0	0	0.00022768
649	0.000367458	0	0	0	0.000221666
650	0.000359209	0	0	0	0.000215664
651	0.000351014	0	0	0	0.000209676
652	0.000342868	5.67811e-08	0	0	0.000203708
653	0.000333826	3.39697e-06	0	0	0.000197701
654	0.000324893	6.65371e-06	0	0	0.00019173
655	0.00031608	9.81541e-06	0	0	0.000185807
656	0.000307402	1.28705e-05	0	0	0.000179942
657	0.000298869	1.58079e-05	0	0	0.000174146
658	0.000290494	1.86169e-05	0	0	0.000168431
659	0.000282288	2.12877e-05	0	0	0.00016281
660	0.000274261	2.38116e-05	0	0	0.000157295
661	0.000266421	2.61808e-05	0	0	0.000151897
662	0.000258778	2.83892e-05	0	0	0.000146627
663	0.000251337	3.0432e-05	0	0	0.000141496
664	0.000244104	3.23057e-05	0	0	0.000136513
665	0.000237083	3.40086e-05	0	0	0.000131687
666	0.000230277	3.55403e-05	0	0	0.000127024
667	0.000223688	3.6902e-05	0	0	0.000122532
668	0.000217318	3.8096e-05	0	0	0.000118214
669	0.000211166	3.91259e-05	0	0	0.000114074
670	0.000205231	3.99964e-05	0	0	0.000110115
671	0.000199512	4.07131e-05	0	0	0.000106338
672	0.000194005	4.12822e-05	0	0	0.000102742
673	0.000188709	4.17106e-05	0	0	9.9328e-05
674	0.000183622	4.20046e-05	0	0	9.60945e-05
675	0.000178741	4.2171e-05	0	0	9.30407e-05
676	0.000174058	4.22192e-05	0	0	9.01605e-05
677	0.00016957	4.21571e-05	0	0	8.74501e-05
678	0.000165273	4.19922e-05	0	0	8.49053e-05
679	0.00016116	4.17317e-05	0	0	8.25214e-05
680	0.000157229	4.1383e-05	0	0	8.02934e-05
681	0.000153473	4.09531e-05	0	0	7.82158e-05
682	0.000149888	4.04486e-05	0	0	7.62832e-05
683	0.000146469	3.98763e-05	0	0	7.44898e-05
684	0.000143211	3.92424e-05	0	0	7.28296e-05
685	0.000140108	3.85534e-05	0	0	7.12965e-05
686	0.000137155	3.78153e-05	0	0	6.98841e-05
687	0.000134347	3.70343e-05	0	0	6.85859e-05
688	0.000131677	3.62165e-05	0	0	6.73953e-05
689	0.00012914	3.53681e-05	0	0	6.63055e-05
690	0.00012673	3.44951e-05	0	0	6.53094e-05
691	0.000124441	3.36038e-05	0	0	6.43998e-05
692	0.000122265	3.27004e-05	0	0	6.35694e-05
693	0.000120198	3.17911e-05	0	0	6.28109e-05
694	0.000118232	3.08822e-05	0	0	6.21166e-05
695	0.000116361	2.99799e-05	0	0	6.14791e-05
696	0.000114578	2.90904e-05	0	0	6.08909e-05
697	0.000112876	2.82196e-05	0	0	6.03444e-05
698	0.000111249	2.73733e-05	0	0	5.98326e-05
699	0.000109691	2.6557e-05	0	0	5.93484e-05
700	0.000108196	2.57759e-05	0	0	5.88852e-05
701	0.000106758	2.50347e-05	0	0	5.84369e-05
702	0.000105371	2.43375e-05	0	0	5.79976e-05
703	0.000104032	2.3688e-05	0	0	5.75623e-05
704	0.000102735	2.30892e-05	0	0	5.71266e-05
705	0.000101477	2.25435e-05	0	0	5.66866e-05
706	0.000100254	2.20524e-05	0	0	5.62392e-05
707	9.90633e-05	2.16169e-05	0	0	5.57822e-05
708	9.79036e-05	2.1237e-05	0	0	5.53139e-05
709	9.67729e-05	2.09121e-05	0	0	5.48333e-05
710	9.56702e-05	2.06409e-05	0	0	5.43404e-05
711	9.4595e-05	2.0421e-05	0	0	5.38354e-05
712	9.35474e-05	2.02497e-05	0	0	5.33193e-05
713	9.25279e-05	2.01234e-05	0	0	5.27935e-05
714	9.15372e-05	2.0038e-05	0	0	5.22599e-05
715	9.05765e-05	1.99887e-05	0	0	5.17204e-05
716	8.96473e-05	1.99705e-05	0	0	5.11775e-05
717	8.87518e-05	1.99777e-05	0	0	5.06335e-05
718	8.7891e-05	2.00038e-05	0	0	5.0091e-05
719	8.70667e-05	2.00424e-05	0	0	4.95526e-05
720	8.62807e-05	2.00867e-05	0	0	4.90204e-05
721	8.55348e-05	2.013e-05	0	0	4.84969e-05
722	8.48235e-05	2.01481e-05	1.91548e-07	0	4.79642e-05
723	8.41207e-05	2.00672e-05	1.31261e-06	0	4.73481e-05
724	8.34638e-05	1.99668e-05	2.40977e-06	0	4.67491e-05
725	8.28547e-05	1.98406e-05	3.47538e-06	0	4.61696e-05
726	8.22948e-05	1.96829e-05	4.50183e-06	0	4.56122e-05
727	8.17859e-05	1.94878e-05	5.48176e-06	0	4.50791e-05
728	8.13294e-05	1.92501e-05	6.40814e-06	0	4.45728e-05
729	8.09267e-05	1.89648e-05	7.2745e-06	0	4.40956e-05
730	8.05792e-05	1.86272e-05	8.07498e-06	0	4.36497e-05
731	8.0288e-05	1.82332e-05	8.80454e-06	0	4.32374e-05
732	8.00543e-05	1.77792e-05	9.45902e-06	0	4.2861e-05
733	7.9879e-05	1.72621e-05	1.00353e-05	0	4.2523e-05
734	7.9763e-05	1.66795e-05	1.05311e-05	0	4.22254e-05
735	7.9707e-05	1.60296e-05	1.09455e-05	0	4.19707e-05
736	7.97113e-05	1.53113e-05	1.12785e-05	0	4.17609e-05
737	7.97761e-05	1.45241e-05	1.15311e-05	0	4.15979e-05
738	7.99014e-05	1.36686e-05	1.17055e-05	0	4.14835e-05
739	8.00865e-05	1.27456e-05	1.18045e-05	0	4.14192e-05
740	8.03305e-05	1.17572e-05	1.18319e-05	0	4.14059e-05
741	8.06321e-05	1.07058e-05	1.17922e-05	0	4.14443e-05
742	8.09893e-05	9.59489e-06	1.16903e-05	0	4.15343e-05
743	8.13997e-05	8.4285e-06	1.15316e-05	0	4.16753e-05
744	8.18601e-05	7.21138e-06	1.13216e-05	0	4.18661e-05
745	8.23669e-05	5.94895e-06	1.10661e-05	0	4.21047e-05
746	8.29158e-05	4.64722e-06	1.07707e-05	0	4.23882e-05
747	8.35018e-05	3.31274e-06	1.04411e-05	0	4.27132e-05
748	8.41196e-05	1.95257e-06	1.00826e-05	0	4.30751e-05
749	8.47631e-05	5.74157e-07	9.70018e-06	0	4.34691e-05
750	8.51976e-05	0	9.10833e-06	0	4.38928e-05
751	8.54828e-05	0	8.36696e-06	0	4.43389e-05
752	8.57745e-05	0	7.61592e-06	0	4.47976e-05
753	8.60675e-05	0	6.86059e-06	0	4.52615e-05
754	8.63563e-05	0	6.10591e-06	0	4.5723e-05
755	8.66354e-05	0	5.35638e-06	0	4.61739e-05
756	8.68993e-05	0	4.61606e-06	0	4.66063e-05
757	8.71425e-05	0	3.88859e-06	0	4.70125e-05
758	8.73597e-05	0	3.17723e-06	0	4.73845e-05
759	8.75451e-05	0	2.48518e-06	0	4.77145e-05
760	8.76946e-05	0	1.81451e-06	0	4.79965e-05
761	8.78037e-05	0	1.16724e-06	0	4.82246e-05
762	8.78688e-05	0	5.45033e-07	0	4.83938e-05
763	8.7883e-05	0	0	0	4.84944e-05
764	8.78137e-05	0	0	0	4.84741e-05
765	8.76936e-05	0	0	0	4.83882e-05
766	8.75212e-05	0	0	0	4.82354e-05
767	8.72955e-05	0	0	0	4.80156e-05
768	8.70161e-05	0	0	0	4.77295e-05
769	8.66834e-05	0	0	0	4.73791e-05
770	8.62981e-05	0	0	0	4.69668e-05
771	8.58616e-05	0	0	0	4.6496e-05
772	8.5376e-05	0	0	0	4.59709e-05
773	8.48437e-05	0	0	0	4.53961e-05
774	8.42677e-05	0	0	0	4.47768e-05
775	8.36514e-05	0	0	0	4.41185e-05
776	8.29984e-05	0	0	0	4.3427e-05
777	8.2313e-05	0	0	0	4.27082e-05
778	8.15994e-05	0	0	0	4.19681e-05
779	8.08623e-05	0	0	0	4.12125e-05
780	8.01064e-05	0	0	0	4.04472e-05
781	7.93366e-05	0	0	0	3.96777e-05
782	7.85579e-05	0	0	0	3.89093e-05
783	7.77754e-05	0	0	0	3.81467e-05
784	7.69939e-05	0	0	0	3.73946e-05
785	7.62183e-05	0	0	0	3.66569e-05
786	7.54536e-05	0	0	0	3.59375e-05
787	7.47042e-05	0	0	0	3.52395e-05
788	7.39748e-05	0	0	0	3.45658e-05
789	7.32696e-05	0	0	0	3.39189e-05
790	7.25925e-05	0	0	0	3.33009e-05
791	7.19473e-05	0	0	0	3.27135e-05
792	7.13374e-05	0	0	0	3.21581e-05
793	7.0766e-05	0	0	0	3.16359e-05
794	7.02357e-05	0	0	0	3.11478e-05
795	6.97491e-05	0	0	0	3.06945e-05
796	6.93083e-05	0	0	0	3.02765e-05
797	6.88935e-05	0	3.31396e-07	0	2.98592e-05
798	6.84876e-05	0	1.28466e-06	0	2.94122e-05
799	6.81198e-05	0	2.25545e-06	1.36209e-07	2.89907e-05
800	6.77685e-05	0	3.10168e-06	8.15105e-07	2.8584e-05
801	6.7452e-05	5.00761e-08	3.99046e-06	1.48967e-06	2.82088e-05
802	6.70407e-05	6.50223e-07	4.86378e-06	1.959e-06	2.78732e-05
803	6.66864e-05	1.21489e-06	5.7732e-06	2.45053e-06	2.75689e-05
804	6.63895e-05	1.74294e-06	6.71069e-06	2.96062e-06	2.72968e-05
805	6.61505e-05	2.2334e-06	7.66757e-06	3.48515e-06	2.70579e-05
806	6.59693e-05	2.68547e-06	8.63463e-06	4.01966e-06	2.68532e-05
807	6.58459e-05	3.09846e-06	9.60233e-06	4.55938e-06	2.66836e-05
808	6.57801e-05	3.47185e-06	1.05609e-05	5.09939e-06	2.655e-05
809	6.57714e-05	3.80524e-06	1.15007e-05	5.63466e-06	2.64531e-05
810	6.58191e-05	4.09836e-06	1.24122e-05	6.16022e-06	2.63935e-05
811	6.59222e-05	4.35109e-06	1.32862e-05	6.67117e-06	2.63716e-05
812	6.60798e-05	4.56346e-06	1.41141e-05	7.16287e-06	2.63874e-05
813	6.62904e-05	4.73567e-06	1.4888e-05	7.63095e-06	2.64407e-05
814	6.65526e-05	4.8681e-06	1.56007e-05	8.0714e-06	2.65308e-05
815	6.68646e-05	4.96132e-06	1.6246e-05	8.48063e-06	2.66567e-05
816	6.72244e-05	5.01612e-06	1.68188e-05	8.85554e-06	2.68171e-05
817	6.76297e-05	5.03348e-06	1.73147e-05	9.19347e-06	2.70099e-05
818	6.80781e-05	5.01465e-06	1.77308e-05	9.4923e-06	2.7233e-05
819	6.85669e-05	4.9611e-06	1.80648e-05	9.75039e-06	2.74835e-05
820	6.90932e-05	4.87453e-06	1.83156e-05	9.96654e-06	2.77582e-05
821	6.96541e-05	4.75687e-06	1.8483e-05	1.014e-05	2.80538e-05
822	7.02462e-05	4.61026e-06	1.85677e-05	1.02706e-05	2.83663e-05
823	7.08664e-05	4.43703e-06	1.85709e-05	1.03581e-05	2.86916e-05
824	7.15113e-05	4.23967e-06	1.84947e-05	1.0403e-05	2.90256e-05
825	7.21776e-05	4.02078e-06	1.83415e-05	1.04058e-05	2.93639e-05
826	7.28621e-05	3.78303e-06	1.81142e-05	1.03674e-05	2.9702e-05
827	7.35618e-05	3.52914e-06	1.7816e-05	1.02887e-05	3.00359e-05
828	7.42738e-05	3.26178e-06	1.74503e-05	1.01707e-05	3.03613e-05
829	7.49955e-05	2.98356e-06	1.70208e-05	1.00148e-05	3.06744e-05
830	7.57246e-05	2.69693e-06	1.65311e-05	9.82215e-06	3.09717e-05
831	7.64594e-05	2.4042e-06	1.5985e-05	9.59421e-06	3.12501e-05
832	7.71985e-05	2.1074e-06	1.53863e-05	9.33243e-06	3.1507e-05
833	7.7941e-05	1.80835e-06	1.4739e-05	9.03839e-06	3.17403e-05
834	7.86865e-05	1.50854e-06	1.4047e-05	8.71381e-06	3.19483e-05
835	7.94353e-05	1.20915e-06	1.33145e-05	8.3605e-06	3.21301e-05
836	8.01882e-05	9.11043e-07	1.25458e-05	7.98046e-06	3.22852e-05
837	8.09463e-05	6.1477e-07	1.17453e-05	7.57588e-06	3.24137e-05
838	8.17116e-05	3.20565e-07	1.09178e-05	7.14912e-06	3.25162e-05
839	8.24864e-05	2.83807e-08	1.00683e-05	6.70279e-06	3.25937e-05
840	8.32056e-05	0	9.17565e-06	6.13626e-06	3.26518e-05
841	8.3933e-05	0	8.26924e-06	5.5453e-06	3.26888e-05
842	8.46793e-05	0	7.35776e-06	4.94411e-06	3.27061e-05
843	8.54483e-05	0	6.44757e-06	4.33575e-06	3.2706e-05
844	8.62433e-05	0	5.54526e-06	3.72376e-06	3.26911e-05
845	8.70681e-05	0	4.65754e-06	3.11161e-06	3.26641e-05
846	8.79263e-05	0	3.7913e-06	2.50289e-06	3.26272e-05
847	8.88217e-05	0	2.95353e-06	1.90129e-06	3.2583e-05
848	8.97579e-05	0	2.1513e-06	1.31055e-06	3.25335e-05
849	9.07385e-05	0	1.39159e-06	7.3445e-07	3.24807e-05
850	9.17669e-05	0	6.8129e-07	1.76767e-07	3.24264e-05
851	9.28203e-05	0	0	0	3.23519e-05
852	9.38766e-05	0	0	0	3.22036e-05
853	9.49967e-05	0	0	0	3.20659e-05
854	9.61839e-05	0	0	0	3.19401e-05
855	9.74414e-05	0	0	0	3.1827e-05
856	9.87722e-05	0	0	0	3.17271e-05
857	0.000100179	0	0	0	3.16403e-05
858	0.000101664	0	0	0	3.15665e-05
859	0.00010323	0	0	0	3.1505e-05
860	0.000104879	0	0	0	3.14548e-05
861	0.000106614	0	0	0	3.1415e-05
862	0.000108435	0	0	0	3.13842e-05
863	0.000110346	0	0	0	3.13609e-05
864	0.000112347	0	0	0	3.13437e-05
865	0.000114441	0	0	0	3.13309e-05
866	0.00011663	0	0	0	3.1321e-05
867	0.000118914	0	0	0	3.13125e-05
868	0.000121296	0	0	0	3.13041e-05
869	0.000123724	0	8.40429e-07	0	3.12061e-05
870	0.000126247	0	1.75559e-06	0	3.10981e-05
871	0.00012887	0	2.72633e-06	0	3.09813e-05
872	0.000131595	0	3.74402e-06	0	3.08563e-05
873	0.000134423	0	4.80003e-06	0	3.07238e-05
874	0.000137357	0	5.88587e-06	0	3.05849e-05
875	0.000140399	0	6.99335e-06	0	3.04408e-05
876	0.000143551	0	8.11469e-06	0	3.02931e-05
877	0.000146815	0	9.24265e-06	0	3.01437e-05
878	0.000150192	0	1.03706e-05	0	2.99945e-05
879	0.000153686	0	1.14924e-05	0	2.98477e-05
880	0.000157295	0	1.26025e-05	0	2.97055e-05
881	0.00016102	0	1.36776e-05	5.47141e-08	2.95687e-05
882	0.000164849	0	1.465e-05	3.51423e-07	2.94344e-05
883	0.000168797	0	1.56005e-05	6.36624e-07	2.93119e-05
884	0.000172865	0	1.65255e-05	9.0872e-07	2.92033e-05
885	0.000177052	0	1.74202e-05	1.16601e-06	2.91111e-05
886	0.000181358	0	1.82808e-05	1.40736e-06	2.9037e-05
887	0.000185779	0	1.91026e-05	1.63167e-06	2.89823e-05
888	0.000190313	0	1.98806e-05	1.83787e-06	2.89486e-05
889	0.000194959	0	2.06092e-05	2.02508e-06	2.89367e-05
890	0.000199712	0	2.12825e-05	2.19264e-06	2.89474e-05
891	0.000204569	0	2.18947e-05	2.34039e-06	2.8981e-05
892	0.000209527	0	2.24398e-05	2.46879e-06	2.90375e-05
893	0.000214582	0	2.29129e-05	2.57937e-06	2.91161e-05
894	0.000219728	0	2.33099e-05	2.67496e-06	2.9216e-05
895	0.000224962	0	2.36285e-05	2.7602e-06	2.93355e-05
896	0.000230279	0	2.38686e-05	2.84186e-06	2.94726e-05
897	0.000235674	0	2.40328e-05	2.9292e-06	2.96244e-05
898	0.000241142	0	2.41271e-05	3.0341e-06	2.97878e-05
899	0.00024668	0	2.41603e-05	3.1711e-06	2.99589e-05
900	0.000252283	0	2.41451e-05	3.35698e-06	3.01335e-05
901	0.000257948	0	2.40964e-05	3.61017e-06	3.03071e-05
902	0.000263673	0	2.40315e-05	3.94959e-06	3.04749e-05
903	0.000269455	0	2.39685e-05	4.39315e-06	3.06325e-05
904	0.000275294	0	2.39246e-05	4.95591e-06	3.0776e-05
905	0.000281192	0	2.39145e-05	5.64793e-06	3.0902e-05
906	0.000287152	0	2.39482e-05	6.47204e-06	3.10088e-05
907	0.000293178	0	2.40292e-05	7.42172e-06	3.10958e-05
908	0.000299278	0	2.41531e-05	8.47945e-06	3.11645e-05
909	0.000305462	0	2.4306e-05	9.61557e-06	3.12184e-05
910	0.00031174	0	2.44644e-05	1.07882e-05	3.12628e-05
911	0.000318127	0	2.45959e-05	1.1944e-05	3.13052e-05
912	0.000324637	0	2.46601e-05	1.30205e-05	3.13546e-05
913	0.000331286	0	2.46118e-05	1.39489e-05	3.1421e-05
914	0.00033809	0	2.44036e-05	1.46585e-05	3.1515e-05
915	0.000345066	0	2.39897e-05	1.50812e-05	3.16469e-05
916	0.000352227	0	2.333e-05	1.51563e-05	3.18259e-05
917	0.000359585	0	2.23937e-05	1.48352e-05	3.20596e-05
918	0.000367152	0	2.1162e-05	1.40852e-05	3.23531e-05
919	0.000374934	0	1.96305e-05	1.28921e-05	3.27088e-05
920	0.000382934	0	1.78099e-05	1.12614e-05	3.31262e-05
921	0.000391154	0	1.57254e-05	9.2177e-06	3.36017e-05
922	0.000399591	0	1.34148e-05	6.80299e-06	3.41294e-05
923	0.000408239	0	1.09259e-05	4.07326e-06	3.47009e-05
924	0.000417093	0	8.31234e-06	1.09431e-06	3.53066e-05
925	0.000426028	0	4.93527e-06	0	3.58782e-05
926	0.000435083	0	1.13832e-06	0	3.64292e-05
927	0.000444146	0	0	0	3.67044e-05
928	0.000453312	0	0	0	3.68628e-05
929	0.000462649	0	0	0	3.7023e-05
930	0.000472154	0	0	0	3.71836e-05
931	0.000481824	0	0	0	3.73427e-05
932	0.000491654	0	0	0	3.74983e-05
933	0.00050164	0	0	0	3.76481e-05
934	0.000511778	0	0	0	3.77895e-05
935	0.000522064	0	0	0	3.79199e-05
936	0.000532494	0	0	0	3.80361e-05
937	0.000543066	0	0	0	3.81351e-05
938	0.000553775	0	0	0	3.82135e-05
939	0.00056462	0	0	0	3.8268e-05
940	0.0005756	0	0	0	3.82951e-05
941	0.000586714	0	0	0	3.82913e-05
942	0.000597963	0	0	0	3.82531e-05
943	0.000609347	0	0	0	3.8177e-05
944	0.00062087	0	0	0	3.80596e-05
945	0.000632533	0	0	0	3.78977e-05
946	0.000644342	0	0	0	3.76879e-05
947	0.000656301	0	0	0	3.74272e-05
948	0.000668418	0	0	0	3.71124e-05
949	0.000680699	0	0	0	3.67405e-05
950	0.000693154	0	0	0	3.63085e-05
951	0.000705792	0	0	0	3.58135e-05
952	0.000718625	0	0	0	3.52527e-05
953	0.000731663	0	0	0	3.46233e-05
954	0.000744918	0	0	0	3.39231e-05
955	0.000758404	0	0	0	3.31499e-05
956	0.000772132	0	0	0	3.23024e-05
957	0.000786113	0	0	0	3.13801e-05
958	0.000800355	0	0	0	3.03836e-05
959	0.000814867	0	0	0	2.93147e-05
960	0.000829653	0	0	0	2.81768e-05
961	0.000844714	0	0	0	2.69749e-05
962	0.00086005	0	0	0	2.5715e-05
963	0.000875659	0	0	0	2.44043e-05
964	0.000891535	0	0	0	2.30508e-05
965	0.000907673	0	0	0	2.16622e-05
966	0.000924069	0	0	0	2.02456e-05
967	0.00094072	0	0	0	1.8807e-05
968	0.000957625	0	0	0	1.73502e-05
969	0.000974789	0	0	0	1.58767e-05
970	0.000992218	0	0	0	1.43859e-05
971	0.00100992	0	0	0	1.28747e-05
972	0.0010279	0	0	0	1.1338e-05
973	0.00104618	0	0	0	9.76902e-06
974	0.00106477	0	0	0	8.1602e-06
975	0.00108368	0	0	0	6.50348e-06
976	0.00110292	0	0	0	4.79095e-06
977	0.00112251	0	0	0	3.01518e-06
978	0.00114244	0	0	0	1.16936e-06
979	0.00116272	0	0	0	0
980	0.00118331	0	0	0	0
981	0.00120426	0	0	0	0
982	0.00122554	0	0	0	0
983	0.00124716	0	0	0	0
984	0.00126911	0	0	0	0
985	0.00129137	0	0	0	0
986	0.00131394	0	0	0	0
987	0.00133681	0	0	0	0
988	0.00135996	0	0	0	0
989	0.0013834	0	0	0	0
990	0.00140711	0	0	0	0
991	0.00143108	0	0	0	0
992	0.0014553	0	0	0	0
993	0.00147976	0	0	0	0
994	0.00150445	0	0	0	0
995	0.00152936	0	0	0	0
996	0.00155448	0	0	0	0
997	0.00157978	0	0	0	0
998	0.00160525	0	0	0	0
999	0.00163087	0	0	0	0
1000	0.00165661	0	0	0	0
1001	0.00168243	0	0	0	0
1002	0.00170832	0	0	0	0
1003	0.00173422	0	0	0	0
1004	0.0017601	0	0	0	0
1005	0.00178592	0	0	0	0
1006	0.00181163	0	0	0	0
1007	0.0018372	0	0	0	0
1008	0.00186259	0	0	0	0
1009	0.00188775	0	0	0	0
1010	0.00191267	0	0	0	0
1011	0.00193731	0	0	0	0
1012	0.00196167	0	0	0	0
1013	0.00198575	0	0	0	0
1014	0.00200953	0	0	0	0
1015	0.00203304	0	0	0	0
1016	0.00205628	0	0	0	0
1017	0.00207926	0	0	0	0
1018	0.002102	0	0	0	0
1019	0.0021245	0	0	0	0
1020	0.00214677	0	0	0	0
1021	0.0021688	0	0	0	0
1022	0.00219049	0	0	1.1399e-06	0
1023	0.00221149	0	0	7.73018e-06	0
1024	0.00223227	0	0	1.31697e-05	0
1025	0.00225284	0	0	1.71698e-05	0
1026	0.00227318	0	0	1.94924e-05	0
1027	0.00229325	0	0	1.99766e-05	0
1028	0.00231302	0	0	1.85585e-05	0
1029	0.00233246	0	0	1.528e-05	0
1030	0.00235151	0	0	1.02867e-05	0
1031	0.00237014	0	0	3.81354e-06	0
1032	0.00238799	0	0	0	0
1033	0.00240495	0	0	0	0
1034	0.0024213	0	0	0	0
1035	0.00243704	0	0	0	0
1036	0.00245217	0	0	0	0
1037	0.00246667	0	0	0	0
1038	0.00248056	0	0	0	0
1039	0.00249383	0	0	0	0
1040	0.00250651	0	0	0	0
1041	0.0025186	0	0	0	0
1042	0.00253012	0	0	0	0
1043	0.00254109	0	0	0	0
1044	0.00255154	0	0	0	0
1045	0.0025615	0	0	0	0
1046	0.00257098	0	0	0	0
1047	0.00258002	0	0	0	0
1048	0.00258866	0	0	0	0
1049	0.00259692	0	0	0	0
1050	0.00260483	0	0	0	0
1051	0.00261243	0	0	0	0
1052	0.00261976	0	0	0	0
1053	0.00262683	0	0	0	0
1054	0.00263367	0	0	0	0
1055	0.00264031	0	0	0	0
1056	0.00264675	0	0	0	0
1057	0.00265297	0	0	0	0
1058	0.00265898	0	0	0	0
1059	0.00266474	0	0	0	0
1060	0.00267021	0	0	0	0
1061	0.00267535	0	0	0	0
1062	0.00268011	0	0	0	0
1063	0.00268445	0	0	0	0
1064	0.00268834	0	0	0	0
1065	0.00269174	0	0	0	0
1066	0.00269465	0	0	0	0
1067	0.00269655	0	7.86062e-06	0	0
1068	0.00269762	0	2.11003e-05	0	0
1069	0.0026982	0	3.49642e-05	0	0
1070	0.00269834	0	4.89479e-05	0	0
1071	0.00269811	0	6.24171e-05	0	0
1072	0.00269757	0	7.46666e-05	0	0
1073	0.00269677	0	8.50032e-05	0	0
1074	0.00269574	0	9.28384e-05	0	0
1075	0.00269447	0	9.7771e-05	0	0
1076	0.00269293	0	9.96447e-05	0	0
1077	0.00269105	0	9.85668e-05	0	0
1078	0.00268874	0	9.48862e-05	0	0
1079	0.00268591	0	8.91364e-05	0	0
1080	0.00268244	0	8.19565e-05	0	0
1081	0.00267823	0	7.4007e-05	0	0
1082	0.0026732	0	6.58955e-05	0	0
1083	0.00266726	0	5.81226e-05	0	0
1084	0.00266036	0	5.10543e-05	0	0
1085	0.00265246	0	4.49171e-05	0	0
1086	0.00264354	0	3.98123e-05	0	0
1087	0.0026336	0	3.57409e-05	0	0
1088	0.00262263	0	3.26328e-05	0	0
1089	0.00261065	0	3.03746e-05	0	0
1090	0.00259768	0	2.88345e-05	0	0
1091	0.00258374	0	2.78815e-05	0	0
1092	0.00256889	0	2.74011e-05	0	0
1093	0.00255318	0	2.73064e-05	0	0
1094	0.00253667	0	2.75465e-05	0	0
1095	0.00251944	0	2.81129e-05	0	0
1096	0.00250157	0	2.90412e-05	0	0
1097	0.00248318	0	3.03948e-05	0	0
1098	0.00246437	0	3.22697e-05	0	0
1099	0.00244523	0	3.47764e-05	0	0
1100	0.00242587	0	3.80252e-05	0	0
1101	0.00240637	0	4.21097e-05	0	0
1102	0.00238632	0	4.41272e-05	8.77642e-06	0
1103	0.00236602	0	4.55982e-05	2.18842e-05	0
1104	0.00234561	0	4.7019e-05	3.77604e-05	0
1105	0.00232513	0	4.83983e-05	5.61315e-05	0
1106	0.00230463	0	4.97658e-05	7.65179e-05	0
1107	0.00228415	0	5.11696e-05	9.82699e-05	0
1108	0.00226373	0	5.26696e-05	0.000120622	0
1109	0.00224344	0	5.43307e-05	0.000142753	0
1110	0.00222332	0	5.62135e-05	0.000163856	0
1111	0.00220342	0	5.83649e-05	0.000183193	0
1112	0.0021838	0	6.08094e-05	0.000200143	0
1113	0.00216452	0	6.35415e-05	0.000214241	0
1114	0.00214566	0	6.65216e-05	0.000225185	0
1115	0.00212726	0	6.96755e-05	0.000232843	0
1116	0.00210939	0	7.28981e-05	0.000237239	0
1117	0.00209211	0	7.60623e-05	0.000238527	0
1118	0.00207541	2.5809e-07	7.90038e-05	0.000236864	0
1119	0.0020558	1.44714e-05	8.0216e-05	0.000227181	0
1120	0.002037	2.83291e-05	8.10095e-05	0.000215505	0
1121	0.00201908	4.16772e-05	8.13028e-05	0.000202304	0
1122	0.00200206	5.43905e-05	8.10423e-05	0.000188034	0
1123	0.00198597	6.63768e-05	8.02024e-05	0.000173126	0
1124	0.00197082	7.75771e-05	7.87825e-05	0.000157971	0
1125	0.00195657	8.79631e-05	7.68005e-05	0.000142913	0
1126	0.00194321	9.75313e-05	7.42852e-05	0.000128244	0
1127	0.00193068	0.000106297	7.12697e-05	0.000114212	0
1128	0.00191895	0.000114285	6.77869e-05	0.000101016	0
1129	0.00190798	0.000121526	6.38677e-05	8.88265e-05	0
1130	0.0018977	0.000128048	5.95436e-05	7.77836e-05	0
1131	0.00188808	0.000133875	5.485e-05	6.80111e-05	0
1132	0.00187906	0.000139023	4.98319e-05	5.96189e-05	0
1133	0.0018706	0.000143505	4.4549e-05	5.27042e-05	0
1134	0.00186263	0.000147329	3.90781e-05	4.73471e-05	0
1135	0.00185511	0.000150509	3.35149e-05	4.36031e-05	0
1136	0.00184795	0.000153061	2.79713e-05	4.14936e-05	0
1137	0.00184109	0.000155011	2.25722e-05	4.10013e-05	0
1138	0.00183446	0.00015639	1.74546e-05	4.2074e-05	0
1139	0.00182796	0.000157264	1.27425e-05	4.45523e-05	0
1140	0.00182152	0.000157694	8.55221e-06	4.82597e-05	0
1141	0.00181507	0.000157752	4.98274e-06	5.29817e-05	0
1142	0.00180851	0.00015751	2.10978e-06	5.84792e-05	0
1143	0.00180181	0.000157039	0	6.44988e-05	0
1144	0.00179486	0.000156353	0	7.03811e-05	0
1145	0.0017877	0.000155587	0	7.65678e-05	0
1146	0.00178028	0.00015478	0	8.28575e-05	0
1147	0.00177261	0.000153962	0	8.90775e-05	0
1148	0.00176466	0.000153141	1.14651e-07	9.50522e-05	0
1149	0.0017564	0.000152264	1.83745e-06	0.000100205	0
1150	0.00174788	0.00015137	3.87932e-06	0.000104868	0
1151	0.00173911	0.000150448	6.1155e-06	0.000109036	0
1152	0.00173013	0.00014948	8.424e-06	0.000112725	0
1153	0.00172096	0.000148444	1.06925e-05	0.000115967	0
1154	0.00171163	0.000147316	1.28246e-05	0.0001188	0
1155	0.00170217	0.000146071	1.47442e-05	0.000121261	0
1156	0.0016926	0.000144685	1.63989e-05	0.00012338	0
1157	0.00168295	0.000143138	1.77601e-05	0.000125173	0
1158	0.00167324	0.000141411	1.88218e-05	0.000126645	0
1159	0.00166349	0.000139493	1.95966e-05	0.000127786	0
1160	0.00165371	0.000137378	2.01096e-05	0.000128582	0
1161	0.00164391	0.000135064	2.03924e-05	0.000129014	0
1162	0.00163409	0.00013256	2.04765e-05	0.000129072	0
1163	0.00162425	0.000129878	2.03872e-05	0.000128756	0
1164	0.00161438	0.000127037	2.01404e-05	0.000128076	0
1165	0.00160447	0.000124065	1.97414e-05	0.000127056	0
1166	0.00159449	0.000120994	1.91864e-05	0.000125717	0
1167	0.00158444	0.000117863	1.84669e-05	0.000124076	0
1168	0.00157429	0.000114716	1.75754e-05	0.000122125	0
1169	0.00156403	0.000111601	1.65123e-05	0.000119822	0
1170	0.00155363	0.000108571	1.52919e-05	0.000117087	0
1171	0.00154309	0.000105677	1.39477e-05	0.0001138	0
1172	0.00153241	0.000102967	1.25342e-05	0.00010981	0
1173	0.00152157	0.000100482	1.11272e-05	0.000104955	0
1174	0.00151059	9.82531e-05	9.82172e-06	9.90858e-05	0
1175	0.00149948	9.62939e-05	8.72775e-06	9.2093e-05	0
1176	0.00148825	9.46015e-05	7.96697e-06	8.39365e-05	0
1177	0.00147691	9.31518e-05	7.66969e-06	7.46653e-05	0
1178	0.00146548	9.19006e-05	7.97418e-06	6.44305e-05	0
1179	0.00145399	9.07846e-05	9.02913e-06	5.34844e-05	0
1180	0.00144244	8.97233e-05	1.10166e-05	4.21716e-05	0
1181	0.00143086	8.86235e-05	1.40941e-05	3.09177e-05	0
1182	0.00141925	8.7391e-05	1.84458e-05	2.01634e-05	0
1183	0.00140762	8.59351e-05	2.42551e-05	1.03432e-05	0
1184	0.00139598	8.41768e-05	3.16827e-05	1.85018e-06	0
1185	0.00138424	8.13475e-05	3.9312e-05	0	0
1186	0.0013725	7.81255e-05	4.8682e-05	0	0
1187	0.0013608	7.47881e-05	6.02646e-05	0	0
1188	0.00134914	7.13686e-05	7.3763e-05	0	0
1189	0.00133755	6.79195e-05	8.8664e-05	0	0
1190	0.00132604	6.45102e-05	0.000104257	0	0
1191	0.00131464	6.12218e-05	0.000119691	0	0
1192	0.00130336	5.81388e-05	0.000134056	0	0
1193	0.00129213	5.4526e-05	0.000144751	5.73621e-06	0
1194	0.00128105	5.1103e-05	0.000152492	1.25801e-05	0
1195	0.00127013	4.80359e-05	0.000157113	1.96359e-05	0
1196	0.00125938	4.53783e-05	0.000158574	2.66058e-05	0
1197	0.00124877	4.31485e-05	0.000157138	3.32405e-05	0
1198	0.0012383	4.13322e-05	0.000153323	3.9353e-05	0
1199	0.00122794	3.98895e-05	0.000147822	4.48278e-05	0
1200	0.00121764	3.87638e-05	0.000141395	4.96219e-05	0
1201	0.00120738	3.78932e-05	0.000134764	5.37576e-05	0
1202	0.00119714	3.72209e-05	0.00012853	5.73074e-05	0
1203	0.00118688	3.67029e-05	0.000123121	6.03728e-05	0
1204	0.00117658	3.63133e-05	0.000118768	6.3061e-05	0
1205	0.00116625	3.60463e-05	0.000115523	6.54624e-05	0
1206	0.00115586	3.59149e-05	0.000113295	6.76337e-05	0
1207	0.00114542	3.59466e-05	0.000111897	6.95888e-05	0
1208	0.00113494	3.61788e-05	0.000111096	7.1299e-05	0
1209	0.00112441	3.66519e-05	0.000110652	7.27011e-05	0
1210	0.00111383	3.7404e-05	0.00011035	7.37121e-05	0
1211	0.00110323	3.84651e-05	0.000110013	7.42463e-05	0
1212	0.00109262	3.98539e-05	0.000109513	7.42325e-05	0
1213	0.00108199	4.15753e-05	0.000108764	7.36277e-05	0
1214	0.00107137	4.36197e-05	0.000107719	7.24252e-05	0
1215	0.00106078	4.59648e-05	0.000106359	7.06567e-05	0
1216	0.00105023	4.85772e-05	0.00010469	6.83894e-05	0
1217	0.00103974	5.14156e-05	0.000102726	6.57182e-05	0
1218	0.00102932	5.44343e-05	0.000100495	6.27558e-05	0
1219	0.001019	5.75866e-05	9.80255e-05	5.96216e-05	0
1220	0.00100879	6.08276e-05	9.53499e-05	5.64315e-05	0
1221	0.000998695	6.41168e-05	9.24996e-05	5.32886e-05	0
1222	0.000988738	6.74202e-05	8.95028e-05	5.02797e-05	0
1223	0.000978919	7.07118e-05	8.63919e-05	4.74589e-05	0
1224	0.000969246	7.39758e-05	8.3194e-05	4.4851e-05	0
1225	0.000959717	7.72063e-05	7.99334e-05	4.24497e-05	0
1226	0.000950332	8.04066e-05	7.66327e-05	4.02192e-05	0
1227	0.000941087	8.35878e-05	7.33116e-05	3.80996e-05	0
1228	0.000931975	8.6767e-05	6.99882e-05	3.60152e-05	0
1229	0.000922988	8.99636e-05	6.66783e-05	3.38866e-05	0
1230	0.000914119	9.31961e-05	6.33961e-05	3.16441e-05	0
1231	0.000905361	9.64782e-05	6.01546e-05	2.92409e-05	0
1232	0.000896708	9.98161e-05	5.69654e-05	2.66641e-05	0
1233	0.000888156	0.000103206	5.38394e-05	2.39406e-05	0
1234	0.000879704	0.000106636	5.07868e-05	2.11364e-05	0
1235	0.000871354	0.000110083	4.78168e-05	1.83487e-05	0
1236	0.000863109	0.000113523	4.49379e-05	1.56915e-05	0
1237	0.000854971	0.00011693	4.21576e-05	1.32775e-05	0
1238	0.000846945	0.000120282	3.9482e-05	1.11972e-05	0
1239	0.000839033	0.000123567	3.69157e-05	9.50249e-06	0
1240	0.000831235	0.000126785	3.44612e-05	8.19364e-06	0
1241	0.000823551	0.00012995	3.21194e-05	7.21614e-06	0
1242	0.000815976	0.000133087	2.98888e-05	6.46595e-06	0
1243	0.000808506	0.00013623	2.77657e-05	5.80372e-06	0
1244	0.000801136	0.000139416	2.57443e-05	5.07565e-06	0
1245	0.000793861	0.000142682	2.3817e-05	4.13775e-06	0
1246	0.000786676	0.000146056	2.19742e-05	2.87941e-06	0
1247	0.00077958	0.000149553	2.0205e-05	1.24259e-06	0
1248	0.000772561	0.000153066	1.82643e-05	0	0
1249	0.000765611	0.000156469	1.59039e-05	0	0
1250	0.000758757	0.000159927	1.3532e-05	0	0
1251	0.000752009	0.000163423	1.1193e-05	0	0
1252	0.000745379	0.000166935	8.94149e-06	0	0
1253	0.000738879	0.00017044	6.83553e-06	0	0
1254	0.000732518	0.000173913	4.93067e-06	0	0
1255	0.000726306	0.00017733	3.27472e-06	0	0
1256	0.000720248	0.000180667	1.90382e-06	0	0
1257	0.000714348	0.000183904	8.40272e-07	0	0
1258	0.000708608	0.00018702	9.19109e-08	0	0
1259	0.000703012	0.000189969	0	0	0
1260	0.000697581	0.000192785	0	0	0
1261	0.000692314	0.000195463	0	0	0
1262	0.000687208	0.00019799	0	0	0
1263	0.000682238	0.000200311	5.13474e-07	0	0
1264	0.000677417	0.000202446	1.21047e-06	0	0
1265	0.000672742	0.0002044	2.01968e-06	0	0
1266	0.000668212	0.000206177	2.90246e-06	0	0
1267	0.00066383	0.000207782	3.82358e-06	0	0
1268	0.000659597	0.000209224	4.75155e-06	0	0
1269	0.000655515	0.00021051	5.65944e-06	0	0
1270	0.000651589	0.00021165	6.52542e-06	0	0
1271	0.000647822	0.000212653	7.33328e-06	0	0
1272	0.00064422	0.000213528	8.07279e-06	0	0
1273	0.000640786	0.000214283	8.73992e-06	0	0
1274	0.000637525	0.000214926	9.33694e-06	0	0
1275	0.000634441	0.000215465	9.87216e-06	0	0
1276	0.000631538	0.000215905	1.03594e-05	0	0
1277	0.000628818	0.000216254	1.08172e-05	0	0
1278	0.000626282	0.000216521	1.1267e-05	0	0
1279	0.000623929	0.000216715	1.17314e-05	0	0
1280	0.000621756	0.000216848	1.22317e-05	0	0
1281	0.000619758	0.000216936	1.27852e-05	0	0
1282	0.000617926	0.000216997	1.34018e-05	0	0
1283	0.000616251	0.000217053	1.40819e-05	0	0
1284	0.000614717	0.00021713	1.48138e-05	0	0
1285	0.00061331	0.000217258	1.55732e-05	0	0
1286	0.000611956	0.000217007	1.53279e-05	3.26632e-06	0
1287	0.000610655	0.000216552	1.43361e-05	8.79739e-06	0
1288	0.000609428	0.000216293	1.33244e-05	1.40331e-05	0
1289	0.000608262	0.000216289	1.23022e-05	1.87631e-05	0
1290	0.000607144	0.000216598	1.12781e-05	2.27941e-05	0
1291	0.000606067	0.000217263	1.02609e-05	2.59688e-05	0
1292	0.000605027	0.000218312	9.26006e-06	2.81834e-05	0
1293	0.000604027	0.000219754	8.28536e-06	2.94007e-05	0
1294	0.000603071	0.000221579	7.34738e-06	2.96586e-05	0
1295	0.000602172	0.000223755	6.457e-06	2.90724e-05	0
1296	0.000601343	0.000226231	5.62492e-06	2.783e-05	0
1297	0.000600602	0.000228941	4.861e-06	2.61829e-05	0
1298	0.000599968	0.00023181	4.17343e-06	2.44325e-05	0
1299	0.000599459	0.000234751	3.56795e-06	2.29155e-05	0
1300	0.000599094	0.000237678	3.04719e-06	2.19877e-05	0
1301	0.000598886	0.000240506	2.61026e-06	2.2009e-05	0
1302	0.00059885	0.000243154	2.2527e-06	2.3329e-05	0
1303	0.000598994	0.000245549	1.96696e-06	2.62719e-05	0
1304	0.000599321	0.00024763	1.74341e-06	3.11213e-05	0
1305	0.000599834	0.000249353	1.57199e-06	3.81032e-05	0
1306	0.000600531	0.000250683	1.44495e-06	4.74053e-05	0
1307	0.0006014	0.000251619	1.35759e-06	5.90513e-05	0
1308	0.000602426	0.000252186	1.31246e-06	7.29533e-05	0
1309	0.000603591	0.000252432	1.32121e-06	8.89026e-05	0
1310	0.00060487	0.000252437	1.40576e-06	0.000106549	0
1311	0.000606237	0.000252306	1.59859e-06	0.000125406	0
1312	0.000607658	0.000252172	1.94165e-06	0.000144865	0
1313	0.0006091	0.00025218	2.48384e-06	0.000164232	0
1314	0.000610527	0.000252489	3.27723e-06	0.000182773	0
1315	0.000611903	0.000253251	4.37228e-06	0.000199768	0
1316	0.000613194	0.000254604	5.81273e-06	0.000214574	0
1317	0.00061437	0.00025666	7.63074e-06	0.000226678	0
1318	0.000615404	0.000259497	9.8432e-06	0.000235744	0
1319	0.000616276	0.000263152	1.24494e-05	0.000241645	0
1320	0.000616969	0.000267617	1.54312e-05	0.000244466	0
1321	0.000617474	0.000272846	1.87545e-05	0.000244492	0
1322	0.000617785	0.000278759	2.23739e-05	0.000242175	0
1323	0.000617902	0.000285247	2.62375e-05	0.000238085	0
1324	0.000617827	0.000292189	3.0294e-05	0.000232851	0
1325	0.000617566	0.000299458	3.44996e-05	0.000227101	0
1326	0.000617125	0.000306933	3.88238e-05	0.000221411	0
1327	0.000616513	0.000314506	4.32565e-05	0.000216258	0
1328	0.00061574	0.000322085	4.7812e-05	0.000211991	0
1329	0.000614814	0.000329599	5.25332e-05	0.000208816	0
1330	0.000613747	0.000337001	5.74954e-05	0.000206796	0
1331	0.000612548	0.000344263	6.28077e-05	0.000205856	0
1332	0.000611225	0.000351374	6.86149e-05	0.000205805	0
1333	0.000609784	0.000358342	7.50966e-05	0.000206358	0
1334	0.000608227	0.000365186	8.24637e-05	0.000207165	0
1335	0.000606552	0.000371935	9.09493e-05	0.000207844	0
1336	0.000604755	0.000378625	0.000100792	0.000208015	0
1337	0.000602826	0.000385293	0.00011221	0.000207332	0
1338	0.000600755	0.000391974	0.000125366	0.000205523	0
1339	0.000598535	0.000398697	0.000140324	0.00020242	0
1340	0.000596162	0.000405484	0.000157003	0.000197988	0
1341	0.000593643	0.000412344	0.000175139	0.000192341	0
1342	0.000590994	0.000419273	0.000194265	0.000185748	0
1343	0.000588245	0.000426253	0.000213717	0.00017862	0
1344	0.000585436	0.000433254	0.000232675	0.000171487	0
1345	0.000582618	0.000440229	0.000250237	0.000164954	0
1346	0.000579848	0.000447119	0.000265526	0.000159648	0
1347	0.000577182	0.000453852	0.000277797	0.000156167	0
1348	0.000574671	0.000460343	0.000286492	0.000155062	0
1349	0.000572358	0.000466503	0.000291443	0.000156712	0
1350	0.000570265	0.000472245	0.000292847	0.00016132	0
1351	0.000568405	0.000477488	0.00029118	0.000168938	0
1352	0.000566775	0.000482168	0.000287155	0.000179453	0
1353	0.000565358	0.000486244	0.000281618	0.000192601	0
1354	0.00056413	0.00048971	0.000275433	0.000207987	0
1355	0.000563059	0.000492597	0.000269386	0.000225112	0
1356	0.000562111	0.000494977	0.00026411	0.000243396	0
1357	0.000561246	0.000496958	0.000260045	0.00026221	0
1358	0.000560425	0.000498681	0.000257433	0.000280904	0
1359	0.000559612	0.000500306	0.000256344	0.000298846	0
1360	0.000558768	0.000501999	0.000256712	0.000315451	0
1361	0.00055786	0.000503916	0.000258386	0.000330231	0
1362	0.000556857	0.000506192	0.000261168	0.000342826	0
1363	0.000555738	0.000508923	0.000264857	0.000353043	0
1364	0.000554483	0.00051216	0.000269273	0.000360873	0
1365	0.000553086	0.000515905	0.000274275	0.000366497	0
1366	0.000551543	0.000520111	0.000279779	0.000370271	0
1367	0.000549861	0.000524691	0.00028576	0.000372688	0
1368	0.000548051	0.000529526	0.000292259	0.000374325	0
1369	0.000546128	0.000534482	0.000299386	0.000375776	0
1370	0.000544105	0.000539421	0.000307319	0.000377592	0
1371	0.000541997	0.000544221	0.000316305	0.000380213	0
1372	0.000539816	0.000548781	0.000326656	0.000383931	0
1373	0.000537566	0.000553029	0.000338754	0.000388865	0
1374	0.00053525	0.000556922	0.000353046	0.000394964	0
1375	0.000532862	0.000560443	0.000370053	0.000402027	0
1376	0.000530393	0.000563592	0.000390377	0.000409749	0
1377	0.000527829	0.000566377	0.000414719	0.000417764	0
1378	0.000525148	0.000568801	0.000443887	0.000425697	0
1379	0.000522327	0.000570855	0.000478806	0.000433205	0
1380	0.000519336	0.000572514	0.000520508	0.000440012	0
1381	0.000516145	0.00057373	0.000570097	0.000445927	0
1382	0.000512721	0.000574446	0.000628672	0.000450858	0
1383	0.000509034	0.000574598	0.000697217	0.000454815	0
1384	0.00050506	0.000574128	0.000776453	0.000457921	0
1385	0.000500787	0.000573004	0.000866684	0.000460413	0
1386	0.000496213	0.000571224	0.000967661	0.00046264	0
1387	0.000491355	0.000568833	0.00107852	0.000465061	0
1388	0.000486243	0.000565918	0.00119781	0.000468207	0
1389	0.000480914	0.000562601	0.00132367	0.000472637	0
1390	0.000475407	0.00055903	0.00145417	0.000478883	0
1391	0.000469755	0.000555356	0.00158754	0.000487307	0
1392	0.00046397	0.000551703	0.00172278	0.000497996	0
1393	0.000458035	0.000548145	0.00185994	0.000510739	0
1394	0.0004519	0.000544689	0.00200037	0.000524975	0
1395	0.000445486	0.000541268	0.00214673	0.000539806	0
1396	0.000438683	0.00053774	0.0023029	0.000554041	0
1397	0.000431364	0.000533895	0.00247375	0.000566284	0
1398	0.000423384	0.00052947	0.00266486	0.000575016	0
1399	0.000414593	0.000524157	0.00288225	0.000578679	0
1400	0.000404835	0.000517628	0.00313213	0.000575748	0
1401	0.00039395	0.000509542	0.00342068	0.000564794	0
1402	0.000381783	0.000499563	0.00375383	0.000544556	0
1403	0.000368181	0.000487378	0.00413688	0.000514026	0
1404	0.000353011	0.000472708	0.00457418	0.000472569	0
1405	0.00033617	0.000455327	0.00506863	0.000420039	0
1406	0.000317598	0.000435084	0.00562126	0.000356896	0
1407	0.000297293	0.000411906	0.00623089	0.00028426	0
1408	0.000275316	0.000385811	0.00689401	0.0002039	0
1409	0.000251797	0.000356904	0.00760492	0.000118121	0
1410	0.000226925	0.000325372	0.00835609	2.95704e-05	0
1411	0.00019997	0.000283096	0.00912069	0	0
1412	0.00017173	0.000234932	0.0098989	0	0
1413	0.000143026	0.000185765	0.0106905	0	0
1414	0.000114203	0.000136273	0.0114862	0	0
1415	8.56225e-05	8.71269e-05	0.0122764	0	0
1416	5.76563e-05	3.90117e-05	0.0130514	0	0
1417	2.86385e-05	0	0.0137991	0	0
1418	0	0	0.0144953	0	0
1419	0	0	0.0151258	0	0
1420	0	0	0.0157019	0	0
1421	0	0	0.0162145	0	0
1422	0	0	0.0166559	0	0
1423	0	0	0.0170209	0	0
1424	0	0	0.0173078	0	0
1425	0	0	0.0175187	0	0
1426	0	0	0.0176595	0	0
1427	0	0	0.0177394	0	0
1428	0	0	0.0177702	0	0
1429	0	0	0.0177645	0	0
1430	0	0	0.0177345	0	0
1431	0	0	0.0176898	0	0
1432	0	0	0.0176373	0	0
1433	0	0	0.0175796	0	0
1434	0	0	0.017516	0	0
1435	0	0	0.0174426	0	0
1436	0	0	0.0173541	0	0
1437	0	0	0.0172447	0	0
1438	0	0	0.017109	0	0
1439	0	0	0.0169428	0	0
1440	0	0	0.016743	0	0
1441	0	0	0.0165073	0	0
1442	0	0	0.0162333	0	0
1443	0	0	0.0159186	0	0
1444	1.55214e-05	0	0.015548	0	0
1445	3.90831e-05	0	0.015106	4.61413e-05	0
1446	6.51617e-05	0	0.0146069	0.00010118	0
1447	9.4099e-05	0	0.0140483	0.000162522	0
1448	0.000126	0	0.0134292	0.000229689	0
1449	0.000160821	0	0.0127513	0.000301708	0
1450	0.000189408	3.46206e-05	0.0120168	0.000363386	0
1451	0.000217331	8.0644e-05	0.0112372	0.000421832	0
1452	0.000245979	0.000130386	0.0104259	0.000477662	0
1453	0.000274886	0.000182857	0.00959806	0.000528735	0
1454	0.000303559	0.000236897	0.00876999	0.000573153	0
1455	0.000331528	0.000291273	0.00795759	0.00060951	0
1456	0.00035838	0.000344781	0.00717508	0.00063707	0
1457	0.000383794	0.000396337	0.0064339	0.000655855	0
1458	0.000407551	0.000445053	0.00574209	0.000666604	0
1459	0.000429533	0.000490275	0.00510423	0.000670627	0
1460	0.000449712	0.000531599	0.00452178	0.000669575	0
1461	0.00046812	0.000568853	0.00399379	0.000665176	0
1462	0.000484825	0.000602062	0.00351774	0.000658981	0
1463	0.000499903	0.000631394	0.00309039	0.000652169	0
1464	0.000513423	0.000657116	0.00270844	0.000645438	0
1465	0.000525438	0.000679545	0.00236893	0.000638991	0
1466	0.000535983	0.000699014	0.00206938	0.000632613	0
1467	0.000545087	0.000715854	0.00180766	0.000625812	0
1468	0.000552786	0.000730379	0.00158173	0.000617989	0
1469	0.00055913	0.000742882	0.00138937	0.000608602	0
1470	0.000564198	0.000753639	0.00122789	0.000597303	0
1471	0.000568101	0.000762907	0.00109405	0.000584011	0
1472	0.000570976	0.000770925	0.000984043	0.000568933	0
1473	0.000572979	0.000777915	0.000893719	0.000552519	0
1474	0.00057427	0.00078407	0.000818892	0.000535381	0
1475	0.000575005	0.000789561	0.000755509	0.0005182	0
1476	0.00057533	0.000794545	0.000699846	0.00050159	0
1477	0.00057535	0.000799134	0.000649149	0.000486012	0
1478	0.000575135	0.000803413	0.000601503	0.000471733	0
1479	0.000574721	0.00080744	0.000555808	0.000458825	0
1480	0.000574113	0.00081125	0.000511667	0.000447192	0
1481	0.000573294	0.00081486	0.000469208	0.000436624	0
1482	0.000572232	0.00081827	0.000428887	0.000426869	0
1483	0.00057089	0.000821466	0.000391299	0.000417687	0
1484	0.000569231	0.00082442	0.000357041	0.000408906	0
1485	0.000567224	0.000827094	0.000326616	0.000400436	0
1486	0.000564846	0.000829438	0.000300404	0.000392275	0
1487	0.000562086	0.000831391	0.000278661	0.000384486	0
1488	0.000558941	0.000832888	0.000261555	0.000377157	0
1489	0.000555416	0.000833862	0.000249193	0.000370368	0
1490	0.000551523	0.00083425	0.00024164	0.000364152	0
1491	0.000547282	0.000833999	0.00023891	0.000358474	0
1492	0.000542716	0.000833075	0.000240934	0.00035323	0
1493	0.000537854	0.000831468	0.000247486	0.000348262	0
1494	0.000532734	0.000829197	0.000258111	0.000343393	0
1495	0.000527399	0.000826313	0.000272047	0.000338468	0
1496	0.0005219	0.000822895	0.00028818	0.000333405	0
1497	0.000516294	0.000819051	0.000305053	0.000328223	0
1498	0.000510642	0.000814903	0.00032093	0.000323064	0
1499	0.000505005	0.00081058	0.000333946	0.000318177	0
1500	0.000499438	0.000806203	0.000342302	0.000313887	0
1501	0.000493983	0.000801871	0.000344487	0.000310537	0
1502	0.000488669	0.000797652	0.000339495	0.000308429	0
1503	0.000483504	0.00079357	0.000326972	0.000307767	0
1504	0.000478474	0.000789607	0.000307286	0.000308616	0
1505	0.000473552	0.000785706	0.00028148	0.000310887	0
1506	0.000468696	0.000781777	0.000251126	0.000314351	0
1507	0.000463863	0.000777712	0.000218112	0.000318667	0
1508	0.000459011	0.0007734	0.000184389	0.000323428	0
1509	0.000454109	0.00076874	0.00015174	0.000328198	0
1510	0.000449143	0.000763654	0.000121598	0.00033255	0
1511	0.000444111	0.000758097	9.49483e-05	0.000336085	0
1512	0.000439029	0.000752056	7.23079e-05	0.000338441	0
1513	0.000433923	0.000745554	5.37842e-05	0.000339291	0
1514	0.000428825	0.000738641	3.91807e-05	0.000338345	0
1515	0.000423764	0.000731385	2.81259e-05	0.000335353	0
1516	0.000418768	0.000723865	2.02106e-05	0.000330098	0
1517	0.000413853	0.000716156	1.5088e-05	0.000322414	0
1518	0.000409023	0.000708326	1.24379e-05	0.000312303	0
1519	0.000404272	0.000700423	1.21078e-05	0.000299846	0
1520	0.00039959	0.000692473	1.40219e-05	0.000285262	0
1521	0.000394961	0.000684479	1.81135e-05	0.000268916	0
1522	0.000390372	0.000676432	2.42433e-05	0.000251316	0
1523	0.000385818	0.000668312	3.21218e-05	0.000233091	0
1524	0.0003813	0.000660098	4.12578e-05	0.000214961	0
1525	0.000376833	0.000651773	5.09478e-05	0.00019768	0
1526	0.000372438	0.000643336	6.03154e-05	0.00018198	0
1527	0.000368143	0.000634797	6.83997e-05	0.000168506	0
1528	0.00036398	0.000626187	7.42764e-05	0.000157754	0
1529	0.000359973	0.000617548	7.71916e-05	0.000150022	0
1530	0.00035614	0.000608933	7.66771e-05	0.000145384	0
1531	0.000352486	0.0006004	7.26257e-05	0.00014368	0
1532	0.000349004	0.000592009	6.53084e-05	0.000144545	0
1533	0.000345673	0.000583818	5.5331e-05	0.000147451	0
1534	0.000342464	0.000575882	4.35428e-05	0.000151766	0
1535	0.000339343	0.000568249	3.09171e-05	0.000156825	0
1536	0.000336274	0.000560965	1.84305e-05	0.000161987	0
1537	0.000333225	0.000554069	6.96344e-06	0.000166688	0
1538	0.000330083	0.000547492	0	0.0001696	0
1539	0.000326767	0.000541191	0	0.000169779	0
1540	0.000323485	0.00053546	0	0.000169316	0
1541	0.000320233	0.000530318	0	0.000168171	0
1542	0.000317011	0.000525772	0	0.000166361	0
1543	0.000313819	0.000521815	0	0.000163957	0
1544	0.000310662	0.00051843	0	0.000161079	0
1545	0.000307415	0.000515428	4.2298e-06	0.000156553	0
1546	0.000303993	0.000512657	1.57998e-05	0.000149587	0
1547	0.00030058	0.000510288	2.89213e-05	0.000142214	0
1548	0.000297212	0.000508307	4.27678e-05	0.000134909	0
1549	0.000293931	0.000506705	5.63365e-05	0.000128193	0
1550	0.000290782	0.000505481	6.85218e-05	0.000122594	0
1551	0.00028781	0.000504643	7.82258e-05	0.000118604	0
1552	0.000285055	0.0005042	8.44903e-05	0.000116622	0
1553	0.000282547	0.000504165	8.66245e-05	0.000116908	0
1554	0.000280306	0.000504546	8.43024e-05	0.00011955	0
1555	0.000278337	0.000505351	7.76085e-05	0.000124452	0
1556	0.000276632	0.000506581	6.70215e-05	0.000131345	0
1557	0.00027516	0.000508236	5.33058e-05	0.00013981	8.82824e-07
1558	0.000273903	0.000510311	3.74726e-05	0.00014936	2.245e-06
1559	0.000272845	0.000512809	2.06129e-05	0.000159479	3.50776e-06
1560	0.000271957	0.000515719	3.76107e-06	0.000169656	4.60906e-06
1561	0.000270862	0.000518586	0	0.00017564	4.46432e-06
1562	0.00026983	0.000521786	0	0.000180234	3.8866e-06
1563	0.00026897	0.000525482	0	0.000184544	3.21582e-06
1564	0.00026828	0.000529687	0	0.000188543	2.47063e-06
1565	0.000267756	0.000534411	0	0.000192254	1.66593e-06
1566	0.000267394	0.000539653	0	0.000195741	8.12451e-07
1567	0.000267186	0.000545409	0	0.000199104	0
1568	0.000267114	0.00055167	0	0.000202454	0
1569	0.000267183	0.00055842	0	0.000205965	0
1570	0.000267387	0.000565643	0	0.000209795	0
1571	0.00026772	0.000573324	0	0.000214111	0
1572	0.000268175	0.000581443	0	0.000219068	0
1573	0.000268748	0.000589987	0	0.000224812	0
1574	0.000269432	0.000598942	0	0.000231463	0
1575	0.000270227	0.000608299	0	0.000239117	0
1576	0.000271129	0.000618054	0	0.000247833	0
1577	0.00027214	0.000628206	0	0.000257631	0
1578	0.000273259	0.000638764	0	0.000268485	0
1579	0.000274492	0.000649738	0	0.000280327	0
1580	0.000275841	0.000661149	0	0.000293038	0
1581	0.000277313	0.00067302	0	0.000306455	0
1582	0.000278916	0.000685382	0	0.000320365	0
1583	0.000280658	0.000698271	0	0.000334514	0
1584	0.000282549	0.000711727	0	0.000348606	0
1585	0.000284598	0.000725795	0	0.000362309	0
1586	0.000286815	0.000740521	0	0.00037527	0
1587	0.000289209	0.000755953	0	0.00038712	0
1588	0.00029179	0.000772137	0	0.0003975	0
1589	0.000294562	0.000789114	0	0.00040608	0
1590	0.00029753	0.000806921	0	0.000412584	0
1591	0.000300692	0.000825582	0	0.000416817	0
1592	0.000304043	0.000845108	0	0.000418686	0
1593	0.000307572	0.000865496	0	0.000418218	0
1594	0.000311265	0.000886726	0	0.000415566	0
1595	0.000315102	0.000908762	0	0.000411005	0
1596	0.000319061	0.000931551	0	0.00040492	0
1597	0.000323118	0.000955029	0	0.00039778	0
1598	0.000327247	0.000979119	0	0.000390107	0
1599	0.000331425	0.00100374	0	0.000382442	0
1600	0.000335634	0.00102881	0	0.000375303	0
1601	0.000339857	0.00105425	0	0.000369189	0
1602	0.000343934	0.00107979	4.8897e-06	0.000362925	0
1603	0.000348125	0.00110568	5.94442e-06	0.000359543	0
1604	0.000352428	0.00113187	3.26698e-06	0.000359183	0
1605	0.000356753	0.00115819	0	0.000360921	0
1606	0.000360989	0.00118444	0	0.000363515	0
1607	0.000365246	0.00121072	0	0.000367893	0
1608	0.000369533	0.00123699	0	0.000373907	0
1609	0.000373859	0.00126322	0	0.000381388	0
1610	0.000378229	0.00128938	0	0.000390175	0
1611	0.000382643	0.00131545	0	0.000400142	0
1612	0.000387097	0.00134138	0	0.000411212	0
1613	0.000391579	0.00136713	0	0.000423368	0
1614	0.000396073	0.00139265	0	0.000436654	0
1615	0.00040056	0.00141789	0	0.000451154	0
1616	0.000405015	0.0014428	0	0.000466977	0
1617	0.000409413	0.00146731	0	0.000484223	0
1618	0.000413732	0.00149137	0	0.000502948	0
1619	0.000417949	0.00151495	0	0.000523134	0
1620	0.000422048	0.00153801	0	0.000544663	0
1621	0.000426018	0.00156053	0	0.000567305	0
1622	0.000429853	0.00158249	0	0.000590719	0
1623	0.000433553	0.00160389	0	0.000614473	0
1624	0.000437121	0.00162475	0	0.000638076	0
1625	0.000440562	0.00164507	0	0.000661027	0
1626	0.000443879	0.00166485	0	0.000682866	0
1627	0.000447074	0.0016841	0	0.000703228	0
1628	0.000450143	0.0017028	0	0.000721887	0
1629	0.000453074	0.00172094	0	0.000738783	0
1630	0.000455851	0.00173846	0	0.000754035	0
1631	0.00045845	0.00175532	0	0.000767924	0
1632	0.000460842	0.00177145	0	0.00078086	0
1633	0.000462995	0.00178679	0	0.000793327	0
1634	0.000464879	0.00180126	0	0.000805823	0
1635	0.000466464	0.00181483	0	0.000818791	0
1636	0.000467728	0.00182743	0	0.000832568	0
1637	0.000468655	0.00183904	0	0.00084734	0
1638	0.000469236	0.00184965	0	0.000863133	0
1639	0.00046947	0.00185926	0	0.00087983	0
1640	0.000469361	0.00186789	0	0.000897215	0
1641	0.000468919	0.00187554	0	0.000915044	0
1642	0.000468151	0.00188222	0	0.000933125	0
1643	0.000467057	0.0018879	0	0.000951418	0
1644	0.000465646	0.00189255	0	0.000970105	0
1645	0.000463911	0.0018961	0	0.000989643	0
1646	0.000461841	0.00189844	0	0.00101078	0
1647	0.000459419	0.00189943	0	0.00103453	0
1648	0.000456622	0.00189892	0	0.00106212	0
1649	0.000453428	0.00189673	0	0.00109491	0
1650	0.000449818	0.00189268	0	0.00113428	0
1651	0.00044578	0.00188661	0	0.00118153	0
1652	0.000441311	0.00187838	0	0.00123777	0
1653	0.00043642	0.00186787	0	0.00130387	0
1654	0.000431129	0.00185499	0	0.0013804	0
1655	0.000425471	0.00183973	0	0.0014676	0
1656	0.000419489	0.00182206	0	0.00156544	0
1657	0.00041323	0.00180201	0	0.00167367	0
1658	0.000406739	0.00177964	0	0.00179189	0
1659	0.000400052	0.00175502	0	0.00191967	0
1660	0.000393193	0.00172823	0	0.00205665	0
1661	0.000386164	0.00169933	0	0.00220265	0
1662	0.000378942	0.00166839	0	0.00235772	0
1663	0.00037148	0.00163546	0	0.00252222	0
1664	0.000363706	0.00160057	0	0.00269682	0
1665	0.000355525	0.00156373	0	0.00288244	0
1666	0.000346833	0.00152493	0	0.00308024	0
1667	0.000337521	0.00148414	0	0.0032915	0
1668	0.000327485	0.00144131	0	0.00351749	0
1669	0.00031664	0.0013964	0	0.0037594	0
1670	0.000304925	0.00134935	0	0.00401821	0
1671	0.000292314	0.0013001	0	0.00429463	0
1672	0.00027881	0.00124862	0	0.00458906	0
1673	0.000264454	0.00119485	0	0.0049016	0
1674	0.000249312	0.00113877	0	0.00523207	0
1675	0.000233473	0.00108034	0	0.00558013	0
1676	0.000217035	0.00101955	0	0.00594528	0
1677	0.000200103	0.000956388	0	0.006327	0
1678	0.000182775	0.000890855	0	0.00672477	0
1679	0.00016514	0.000822973	0	0.00713806	0
1680	0.00014728	0.000752792	0	0.00756628	0
1681	0.000129271	0.000680415	0	0.00800865	0
1682	0.00011119	0.000606004	0	0.00846405	0
1683	9.31235e-05	0.00052981	0	0.00893082	0
1684	7.51772e-05	0.000452178	0	0.00940662	0
1685	5.74901e-05	0.000373557	0	0.00988829	0
1686	4.02253e-05	0.000294537	0	0.0103716	0
1687	2.35722e-05	0.000215782	0	0.0108516	0
1688	7.74172e-06	0.000138018	0	0.0113229	0
1689	0	5.5474e-05	0	0.0117779	0
1690	0	0	0	0.012191	0
1691	0	0	0	0.0125455	0
1692	0	0	0	0.0128735	0
1693	0	0	0	0.0131716	0
1694	0	0	0	0.0134374	0
1695	0	0	0	0.0136695	0
1696	0	0	0	0.0138673	0
1697	0	0	0	0.014031	0
1698	0	0	0	0.0141613	0
1699	0	0	0	0.0142589	0
1700	0	0	0	0.014325	0
1701	0	0	5.68693e-05	0.0143396	0
1702	0	0	0.000156277	0.0143086	0
1703	0	0	0.000262004	0.0142458	0
1704	0	0	0.000371991	0.0141522	0
1705	0	0	0.000484673	0.0140288	0
1706	0	0	0.00059913	0.0138763	0
1707	0	0	0.000715158	0.0136952	0
1708	0	0	0.000833262	0.0134863	0
1709	0	0	0.000954555	0.0132503	0
1710	0	0	0.00108059	0.0129882	0
1711	0	0	0.00121314	0.0127015	0
1712	0	0	0.0013539	0.0123918	0
1713	0	0	0.00150419	0.0120613	0
1714	0	0	0.00166469	0.0117124	0
1715	0	0	0.00183516	0.0113478	0
1716	0	0	0.00201436	0.0109707	0
1717	0	0	0.00219995	0.0105842	0
1718	0	0	0.00238864	0.0101916	0
1719	0	0	0.00257641	0.00979597	0
1720	2.99275e-06	0	0.00275632	0.0093981	2.24549e-05
1721	1.38651e-05	7.69401e-06	0.00291914	0.00899308	7.91971e-05
1722	8.62758e-06	7.78092e-05	0.00306134	0.00856966	0.000138834
1723	3.09177e-06	0.000149873	0.00318517	0.00815449	0.000199454
1724	0	0.000221077	0.00328688	0.00775019	0.00025946
1725	0	0.000290405	0.00336406	0.00735972	0.000318173
1726	0	0.000360137	0.00341614	0.00698666	0.000376379
1727	0	0.000429675	0.00344202	0.00663439	0.000434013
1728	0	0.000498389	0.00344187	0.00630564	0.000491092
1729	0	0.000565676	0.00341644	0.00600268	0.000547537
1730	0	0.000630983	0.00336682	0.00572734	0.000603008
1731	0	0.000693846	0.00329459	0.00548065	0.000656778
1732	0	0.000753909	0.00320183	0.00526269	0.000707648
1733	0	0.000810945	0.00309113	0.00507248	0.000753961
1734	0	0.000864851	0.00296554	0.00490802	0.00079369
1735	0	0.000915648	0.00282855	0.00476633	0.000824634
1736	0	0.000963456	0.00268396	0.00464369	0.000844666
1737	0	0.00100848	0.00253575	0.00453585	0.000852011
1738	0	0.00105096	0.00238794	0.00443835	0.00084551
1739	0	0.00109121	0.0022443	0.0043468	0.000824832
1740	0	0.00112953	0.00210817	0.00425718	0.000790577
1741	2.77252e-06	0.00116372	0.00198147	0.00416565	0.000743363
1742	8.09178e-06	0.0011943	0.00186603	0.0040696	0.000685608
1743	1.34652e-05	0.00122382	0.00176331	0.00396768	0.000621063
1744	1.87516e-05	0.00125269	0.00167314	0.00385906	0.000553001
1745	2.38206e-05	0.00128128	0.00159444	0.00374374	0.000484672
1746	2.85595e-05	0.00130989	0.00152546	0.00362249	0.000418993
1747	3.28768e-05	0.00133873	0.0014641	0.0034966	0.000358314
1748	3.67024e-05	0.00136793	0.00140824	0.00336777	0.000304255
1749	3.99848e-05	0.00139751	0.00135605	0.00323791	0.000257656
1750	4.26894e-05	0.00142738	0.00130615	0.00310895	0.000218624
1751	4.47962e-05	0.00145737	0.00125769	0.00298277	0.000186662
1752	4.62994e-05	0.00148725	0.00121027	0.00286107	0.000160855
1753	4.72084e-05	0.00151676	0.00116374	0.00274535	0.000140076
1754	4.75484e-05	0.00154564	0.00111802	0.00263691	0.000123178
1755	4.73601e-05	0.00157367	0.00107292	0.00253679	0.000109157
1756	4.66975e-05	0.00160066	0.00102801	0.00244582	9.72479e-05
1757	4.56225e-05	0.00162645	0.00098267	0.00236464	8.69693e-05
1758	4.41991e-05	0.00165097	0.000936208	0.00229362	7.81035e-05
1759	4.24863e-05	0.00167415	0.000887983	0.00223295	7.06336e-05
1760	4.05324e-05	0.00169597	0.000837596	0.00218255	6.46518e-05
1761	3.83728e-05	0.00171639	0.000785001	0.00214213	6.02581e-05
1762	3.60297e-05	0.00173543	0.000730539	0.00211113	5.74688e-05
1763	3.35163e-05	0.00175309	0.000674895	0.00208876	5.61481e-05
1764	3.08418e-05	0.00176941	0.000618987	0.00207401	5.59733e-05
1765	2.80176e-05	0.00178447	0.000563823	0.00206561	5.6437e-05
1766	2.5062e-05	0.00179838	0.000510361	0.0020621	5.68864e-05
1767	2.20025e-05	0.00181131	0.000459402	0.00206178	5.65915e-05
1768	1.88761e-05	0.00182348	0.000411533	0.00206284	5.4833e-05
1769	1.57264e-05	0.00183515	0.000367155	0.00206328	5.09637e-05
1770	1.26003e-05	0.00184663	0.000326402	0.00206109	4.45633e-05
1771	9.53979e-06	0.00185822	0.000289223	0.00205433	3.55028e-05
1772	6.57879e-06	0.00187022	0.000255501	0.00204128	2.39225e-05
1773	3.73934e-06	0.00188292	0.000225087	0.00202043	1.02441e-05
1774	9.5439e-07	0.00189654	0.000197677	0.00199055	0
1775	0	0.00190953	0.000172472	0.00195052	0
1776	0	0.00192287	0.000150284	0.00190031	0
1777	0	0.00193739	0.000131672	0.00184019	0
1778	0	0.00195292	0.000117063	0.00177068	0
1779	0	0.00196925	0.000106966	0.00169268	0
1780	0	0.00198606	0.000101871	0.0016074	0
1781	0	0.00200304	0.000102103	0.0015163	0
1782	0	0.00201982	0.000107673	0.00142107	0
1783	0	0.0020361	0.000118148	0.00132351	0
1784	0	0.00205161	0.000132588	0.00122549	0
1785	0	0.00206613	0.000149561	0.00112887	0
1786	0	0.00207952	0.000167266	0.00103543	0
1787	0	0.0020917	0.000183735	0.000946763	0
1788	0	0.00210262	0.000197077	0.000864232	0
1789	0	0.00211224	0.000205735	0.000788888	0
1790	0	0.00212056	0.000208672	0.000721442	0
1791	0	0.00212754	0.000205487	0.000662258	0
1792	0	0.00213314	0.000196401	0.000611375	0
1793	0	0.00213731	0.000182081	0.000568526	1.82479e-06
1794	0	0.00213995	0.000163408	0.000533185	1.04899e-05
1795	0	0.00214115	0.000141968	0.0005049	1.75345e-05
1796	0	0.0021409	0.000118954	0.000483028	2.26499e-05
1797	0	0.00213928	9.537e-05	0.00046692	2.56095e-05
1798	0	0.00213637	7.19454e-05	0.000455959	2.62908e-05
1799	0	0.00213229	4.91307e-05	0.000449581	2.46896e-05
1800	0	0.00212721	2.71368e-05	0.00044727	2.09231e-05
1801	0	0.0021213	6.00638e-06	0.00044855	1.5222e-05
1802	0	0.00211385	0	0.000448369	6.55329e-06
1803	0	0.0021056	0	0.000449024	0
1804	0	0.0020971	0	0.000451789	0
1805	0	0.00208868	0	0.000456259	0
1806	0	0.0020806	0	0.000461774	0
1807	0	0.00207311	0	0.0004676	0
1808	0	0.0020665	0	0.000472938	0
1809	0	0.00206103	0	0.000476944	0
1810	0	0.00205698	0	0.000478766	0
1811	0	0.00205462	0	0.000477543	0
1812	0	0.00205416	0	0.000472524	0
1813	0	0.00205579	0	0.00046317	0
1814	0	0.00205961	0	0.0004491	0
1815	0	0.00206569	0	0.000430165	0
1816	0	0.00207404	0	0.000406461	0
1817	0	0.00208458	0	0.00037833	0
1818	0	0.00209718	0	0.000346332	0
1819	0	0.00211164	0	0.000311207	0
1820	0	0.00212772	0	0.000273818	0
1821	0	0.00214514	0	0.000235088	0
1822	0	0.0021636	0	0.000195946	0
1823	0	0.00218278	0	0.000157266	0
1824	0	0.00220235	0	0.00011983	0
1825	0	0.00222197	0	8.43011e-05	0
1826	0	0.00224133	0	5.12115e-05	0
1827	0	0.00226012	0	2.09647e-05	0
1828	0	0.00227682	0	0	0
1829	0	0.00228886	0	0	0
1830	0	0.00230014	0	0	0
1831	0	0.00231039	0	0	0
1832	0	0.00231937	0	0	0
1833	0	0.00232685	0	0	0
1834	0	0.00233261	0	0	0
1835	0	0.00233647	0	0	0
1836	0	0.00233827	0	0	0
1837	0	0.00233786	0	0	0
1838	0	0.00233513	0	0	0
1839	0	0.00233001	0	0	0
1840	0	0.00232246	0	0	0
1841	0	0.00231245	0	0	0
1842	0	0.00230001	0	0	0
1843	0	0.00228519	0	0	0
1844	0	0.00226808	0	0	0
1845	0	0.00224879	0	0	0
1846	0	0.00222617	0	6.55625e-06	0
1847	0	0.00220036	0	1.98647e-05	0
1848	0	0.00217302	0	3.25318e-05	0
1849	0	0.0021444	0	4.44256e-05	0
1850	0	0.00211476	0	5.54222e-05	0
1851	0	0.00208437	0	6.53797e-05	0
1852	0	0.00205352	0	7.41179e-05	0
1853	0	0.00202249	0	8.13948e-05	0
1854	0	0.0019916	0	8.69242e-05	0
1855	0	0.00196111	0	9.04433e-05	0
1856	0	0.0019313	0	9.16936e-05	0
1857	0	0.00190238	0	9.04875e-05	0
1858	0	0.00187454	0	8.67535e-05	0
1859	0	0.00184791	0	8.05702e-05	0
1860	0	0.00182257	0	7.21808e-05	0
1861	0	0.00179857	0	6.19831e-05	0
1862	0	0.00177588	0	5.04926e-05	0
1863	0	0.00175447	0	3.8284e-05	0
1864	0	0.00173425	0	2.58472e-05	2.4632e-06
1865	0	0.00171513	0	1.36571e-05	7.40362e-06
1866	0	0.00169712	0	2.14368e-06	1.12926e-05
1867	0	0.00167849	0	0	1.35438e-05
1868	0	0.00166061	0	0	1.46794e-05
1869	0	0.00164385	0	0	1.4852e-05
1870	0	0.00162812	0	0	1.40581e-05
1871	0	0.00161336	0	0	1.23011e-05
1872	0	0.00159947	0	0	9.60753e-06
1873	0	0.0015864	0	0	6.04089e-06
1874	0	0.00157406	0	0	1.71014e-06
1875	0	0.00156234	0	0	0
1876	0	0.00155122	0	0	0
1877	0	0.00154071	0	0	0
1878	0	0.00153079	0	0	0
1879	0	0.00152147	0	0	0
1880	0	0.00151275	0	0	0
1881	0	0.00150463	0	0	0
1882	0	0.0014971	0	0	0
1883	0	0.00149018	0	0	0
1884	0	0.00148386	0	0	0
1885	0	0.00147813	0	0	0
1886	0	0.00147297	0	0	0
1887	0	0.00146837	0	0	0
1888	0	0.00146429	0	0	0
1889	0	0.00146071	0	0	0
1890	0	0.00145758	0	0	0
1891	0	0.00145486	0	0	0
1892	0	0.00145248	0	0	0
1893	0	0.0014504	0	0	0
1894	0	0.00144853	0	0	0
1895	0	0.0014468	0	0	0
1896	0	0.00144511	0	0	0
1897	0	0.00144338	0	0	0
1898	0	0.00144151	0	0	0
1899	0	0.00143941	0	0	0
1900	0	0.00143696	0	0	0
1901	0	0.00143407	0	0	0
1902	0	0.00143066	0	0	0
1903	0	0.00142663	0	0	0
1904	0	0.00142189	0	0	0
1905	0	0.00141638	0	0	0
1906	0	0.00141004	0	0	0
1907	0	0.00140281	0	0	0
1908	0	0.00139464	0	0	0
1909	0	0.00138552	0	0	0
1910	0	0.00137542	0	0	0
1911	0	0.00136435	0	0	0
1912	0	0.0013523	0	0	0
1913	0	0.00133929	0	0	0
1914	0	0.00132535	0	0	0
1915	0	0.00131052	0	0	0
1916	0	0.00129485	0	0	0
1917	0	0.00127839	0	0	0
1918	0	0.0012612	0	0	0
1919	0	0.00124336	0	0	0
1920	0	0.00122494	0	0	0
1921	0	0.00120602	0	0	0
1922	0	0.00118668	0	0	0
1923	0	0.00116702	0	0	0
1924	0	0.00114711	0	0	0
1925	0	0.00112705	0	0	0
1926	0	0.00110693	0	0	0
1927	0	0.00108683	0	0	0
1928	0	0.00106683	0	0	0
1929	0	0.00104701	0	0	0
1930	0	0.00102745	0	0	0
1931	0	0.00100822	0	0	0
1932	0	0.000989378	0	0	0
1933	0	0.00097099	0	0	0
1934	0	0.000953106	0	0	0
1935	0	0.000935773	0	0	0
1936	0	0.000919032	0	0	0
1937	0	0.000902919	0	0	0
1938	0	0.00088747	0	0	0
1939	0	0.00087269	0	0	0
1940	0	0.000858591	0	0	0
1941	0	0.000845175	0	0	0
1942	0	0.000832438	0	0	0
1943	0	0.000820368	0	0	0
1944	0	0.000808949	0	0	0
1945	0	0.000798158	0	0	0
1946	0	0.000787971	0	0	0
1947	0	0.000778358	0	0	0
1948	0	0.00076929	0	0	0
1949	0	0.000760736	0	0	0
1950	0	0.000752666	0	0	0
1951	0	0.000745051	0	0	0
1952	0	0.000737858	0	0	0
1953	0	0.000731046	0	0	7.04324e-07
1954	0	0.000724589	0	0	1.78412e-06
1955	0	0.000718464	0	0	2.85506e-06
1956	0	0.00071264	0	0	3.91802e-06
1957	0	0.000707086	0	0	4.97341e-06
1958	0	0.000701769	0	0	6.02111e-06
1959	0	0.00069666	0	0	7.06042e-06
1960	0	0.000691731	0	0	8.08993e-06
1961	4.56759e-07	0.000686512	0	0	8.93736e-06
1962	1.63738e-06	0.000680724	0	0	9.5002e-06
1963	2.78052e-06	0.000675088	0	0	1.00582e-05
1964	3.88402e-06	0.000669593	0	0	1.06074e-05
1965	4.94417e-06	0.000664237	0	0	1.11442e-05
1966	5.95604e-06	0.000659018	0	0	1.16647e-05
1967	6.91393e-06	0.000653943	0	0	1.21655e-05
1968	7.81187e-06	0.000649018	0	0	1.26432e-05
1969	8.64419e-06	0.00064425	0	0	1.3095e-05
1970	9.40594e-06	0.000639648	0	0	1.35185e-05
1971	1.00934e-05	0.000635215	0	0	1.39119e-05
1972	1.07041e-05	0.000630953	0	0	1.42741e-05
1973	1.12377e-05	0.00062686	0	0	1.46045e-05
1974	1.1695e-05	0.000622928	0	0	1.49034e-05
1975	1.20789e-05	0.000619148	0	0	1.51716e-05
1976	1.23939e-05	0.000615505	0	0	1.54107e-05
1977	1.26459e-05	0.00061198	0	0	1.56228e-05
1978	1.28421e-05	0.000608552	0	0	1.58106e-05
1979	1.29907e-05	0.000605196	0	0	1.59775e-05
1980	1.31004e-05	0.000601888	0	0	1.61267e-05
1981	1.31823e-05	0.000598596	0	0	1.62629e-05
1982	1.32466e-05	0.000595293	0	0	1.63903e-05
1983	1.33039e-05	0.000591948	0	0	1.65133e-05
1984	1.33648e-05	0.000588534	0	0	1.66363e-05
1985	1.34396e-05	0.000585021	0	0	1.6764e-05
1986	1.35383e-05	0.000581382	0	0	1.69004e-05
1987	1.36702e-05	0.000577594	0	0	1.70497e-05
1988	1.38437e-05	0.000573633	0	0	1.72157e-05
1989	1.40662e-05	0.000569481	0	0	1.74018e-05
1990	1.4344e-05	0.000565122	0	0	1.76108e-05
1991	1.46819e-05	0.000560545	0	0	1.78453e-05
1992	1.50834e-05	0.000555744	0	0	1.81073e-05
1993	1.55502e-05	0.000550717	0	0	1.83983e-05
1994	1.60826e-05	0.000545467	0	0	1.87191e-05
1995	1.66791e-05	0.000540002	0	0	1.90704e-05
1996	1.73365e-05	0.000534335	0	0	1.9452e-05
1997	1.80502e-05	0.000528486	0	0	1.98635e-05
[truncated: 2,003 more rows]
[truncated: 72 more columns]

## Sheet: 6 Sources
Reconstructed Source Distributions									Compare Input & Reconstructed Sink Samples					Sink Sample Weights
Age (Ma)	Source 1	Source 2	Source 3	Source 4	Source 5	Source 6				Mean		St. Dev.			Princeton, Bluestone, Hinton	Surprise Canyon3- 06GC149, Surprise_Cyn2, SurpriseC_Cngl	24PL09, 10JM94, 40JM94, 05PL15, 09LB04	Mauch_Chunk	KY-21-SG	Tonka	Stanley, Hot_spring	BC05	09-CM-699	MS11, MS10	MS01, MSGE313	BC01, BC02, CC01	ML01, MP-DZ1	1QZ19	SY-D, Watahomigi, Manakacha1	Tumbling Run, Pottsville Fm, OH-1-SS	Pocohontas, Lee, VA-1-GN	Racoon, Montevallo, Sewanee	KY-18-CB	OH-4-SN	BCRA-01-10	MB1-3, MB2-4, MB2-2, MB2-3, MB2-5, MB2-1, MB1-2, MB1-1	a16, a23, a29, a38, a48, a49, a50	46-1, 46-2	IB_AD, IB_M1, IB_M2	FCB_AD	FCB_A2	FCB_A1	S3	GS01, GS09	MS04, MS05, MS06	MC05, MC17	GS11, GS24	MC20	EC01, RC01, RC19
0	2.15236e-07	3.03599e-08	0	4.83841e-09	6.41729e-09	0			Cross-correlation	0.848095	±	0.116473		Weights Source 1	0.157723	0.192723	0	0.268571	0.216272	0	0.366388	0	0.413607	0	0	0.0484092	0.360733	0.222316	0.162524	0.523475	0.0739642	0.154206	0.170529	0.363037	0.237612	0.0841361	0.194866	0.146798	0.294804	0.325713	0.252303	0.0147314	0.261929	0.0699935	0	0.0390467	0.0125223	0.190111	0.0826169
1	2.15617e-07	3.04146e-08	0	4.84704e-09	6.43132e-09	0			Likeness	0.816227	±	0.0753674		Weights Source 2	0.0128792	0.0720493	0	0.00382393	0.0541847	0	0.0136815	0.115066	0.0051624	0.117106	0.506232	0.524376	0.00945078	0.0816193	0.131269	0.00345621	0.0112874	0.0292798	0.0441702	0.00646639	0.000496898	0.0390206	0.0437724	0.0322951	0.0375798	0.0186003	0.0480155	0.0112528	0.0488561	0.222725	0	0.205083	0.516543	0.109334	0.456907
2	2.16381e-07	3.05242e-08	0	4.8643e-09	6.45941e-09	0			Kuiper V Value	0.114817	±	0.0760497		Weights Source 3	0.0280152	0.0656413	0	0.0536423	0.0340153	0	0.0243633	0.161674	0.0514383	0.221682	0.171829	0.201709	0.0414514	0.0511846	0.0312492	0.0171924	0.058781	0.0168518	0.0179809	0.022091	0.0226284	0.0237086	0.0343352	0.0312606	0.0109123	0.0628035	0.0425973	0.0181305	0.0188287	0.151783	0.0406526	0.112853	0.454917	0.121946	0.0852995
3	2.17528e-07	3.06886e-08	0	4.89021e-09	6.5016e-09	0			KS D Value	0.0801671	±	0.0662744		Weights Source 4	0.00215044	0.00180382	0.000985306	0.0102597	0.00205678	0	0.0357977	0.00342545	0.0193721	0	0	0.0297856	0.00786841	0	9.40688e-05	0.00465363	0.00212069	0.00560428	0.000296897	0	0.00872785	0.00244274	0.000600011	7.6233e-05	0.00133134	0.00643383	0.00192458	0.00118086	0.0184124	0	0	0.00470995	0	0.00480218	0.00621155
4	2.19057e-07	3.09079e-08	0	4.92477e-09	6.55796e-09	0								Weights Source 5	0.0328253	0.166162	0.999015	0.0226611	0.150111	1	0.0551499	0.636893	0.0421437	0.214112	0	0.111536	0.0395067	0.475076	0.430829	0	0.037747	0.121121	0.229392	0.000358719	0.0915429	0.218565	0.202212	0.189911	0.165962	0.0849388	0.15746	0.180619	0.108193	0.364757	0	0.424193	0	0.381795	0.258718
5	2.20969e-07	3.11823e-08	0	4.96801e-09	6.62859e-09	0			Number of sink samples	108				Weights Source 6	0.766407	0.501621	0	0.641042	0.543361	0	0.50462	0.0829416	0.468277	0.4471	0.321939	0.0841832	0.540989	0.169804	0.244033	0.451222	0.8161	0.672937	0.53763	0.608047	0.638992	0.632127	0.524214	0.59966	0.489411	0.501511	0.4977	0.774086	0.543781	0.190742	0.959347	0.214115	0.0160171	0.192012	0.110247
6	2.23266e-07	3.15119e-08	0	5.01995e-09	6.7136e-09	0			Mean Cross-correlation of sink samples	0.372
7	2.25948e-07	3.18968e-08	0	5.08062e-09	6.81314e-09	0			Range Cross-correlation of sink samples	0.963				Cross-correlation	0.94824	0.949971	0.658273	0.910609	0.952094	0.632702	0.854507	0.624783	0.888131	0.861868	0.72084	0.875591	0.908371	0.703315	0.852843	0.797512	0.913582	0.915833	0.918737	0.899391	0.920097	0.921701	0.876016	0.88783	0.92951	0.925466	0.959615	0.894827	0.90395	0.867484	0.611532	0.87715	0.92815	0.77707	0.82373
8	2.29016e-07	3.23374e-08	0	5.15005e-09	6.92736e-09	0			Mean Kuiper V value of sink samples	0.408				Likeness	0.869595	0.884883	0.640119	0.835096	0.877963	0.616226	0.795611	0.61146	0.840271	0.786243	0.695497	0.760812	0.863529	0.788739	0.840255	0.780267	0.865163	0.842808	0.843413	0.811433	0.821022	0.866173	0.859394	0.839077	0.866426	0.851141	0.897149	0.810848	0.846635	0.787007	0.485083	0.811402	0.80354	0.800265	0.782172
9	2.32472e-07	3.28337e-08	0	5.22828e-09	7.05645e-09	0			Range Kuiper V value of sink samples	0.961				Kuiper V Value	0.0494144	0.0455855	0.341324	0.112694	0.0676958	0.343466	0.117537	0.26679	0.0844593	0.174778	0.130488	0.0994624	0.0791279	0.171997	0.113976	0.0772463	0.117211	0.0796161	0.0668673	0.0797349	0.100793	0.0497538	0.0838817	0.0964415	0.0546112	0.0745678	0.0512555	0.149302	0.107549	0.180331	0.485842	0.154057	0.0978957	0.184903	0.148135
10	2.36317e-07	3.33861e-08	0	5.31535e-09	7.20064e-09	0			Final Residual	0.164565				KS D Value	0.0432035	0.0231597	0.273061	0.0602671	0.0446866	0.270473	0.0692371	0.240614	0.0519847	0.0905057	0.0963189	0.0590125	0.0408107	0.0870219	0.0581211	0.053256	0.0788401	0.0492934	0.0471958	0.0416588	0.057324	0.0388395	0.0610272	0.052292	0.0353407	0.0534387	0.0303661	0.101294	0.0673768	0.12502	0.347392	0.13664	0.0637647	0.136715	0.0817213
11	2.40552e-07	3.39948e-08	0	5.4113e-09	7.36014e-09	0			Number of Iterations	240
12	2.45179e-07	3.46601e-08	0	5.5162e-09	7.53523e-09	0
13	2.502e-07	3.53824e-08	0	5.63008e-09	7.72619e-09	0
14	2.55617e-07	3.61621e-08	0	5.75302e-09	7.93334e-09	0
15	2.61432e-07	3.69995e-08	0	5.88507e-09	8.15701e-09	0
16	2.67647e-07	3.78949e-08	0	6.0263e-09	8.39756e-09	0
17	2.74264e-07	3.8849e-08	0	6.17678e-09	8.65539e-09	0
18	2.81286e-07	3.9862e-08	0	6.33659e-09	8.93092e-09	0
19	2.88714e-07	4.09345e-08	0	6.5058e-09	9.22459e-09	0
20	2.96552e-07	4.20669e-08	0	6.68449e-09	9.53688e-09	0
21	3.04802e-07	4.32598e-08	0	6.87275e-09	9.86829e-09	0
22	3.13466e-07	4.45137e-08	0	7.07067e-09	1.02194e-08	0
23	3.22548e-07	4.58291e-08	0	7.27834e-09	1.05906e-08	0
24	3.3205e-07	4.72065e-08	0	7.49584e-09	1.09827e-08	0
25	3.41975e-07	4.86467e-08	0	7.72328e-09	1.13963e-08	0
26	3.52325e-07	5.01501e-08	0	7.96076e-09	1.18319e-08	0
27	3.63103e-07	5.17173e-08	0	8.20837e-09	1.22904e-08	0
28	3.74312e-07	5.3349e-08	0	8.46622e-09	1.27723e-08	0
29	3.85956e-07	5.50457e-08	0	8.73441e-09	1.32786e-08	0
30	3.98035e-07	5.68082e-08	0	9.01305e-09	1.38099e-08	0
31	4.10555e-07	5.8637e-08	0	9.30225e-09	1.43672e-08	0
32	4.23516e-07	6.05328e-08	0	9.60211e-09	1.49513e-08	0
33	4.36921e-07	6.24962e-08	0	9.91276e-09	1.55631e-08	0
34	4.50774e-07	6.4528e-08	0	1.02343e-08	1.62035e-08	0
35	4.65077e-07	6.66286e-08	0	1.05668e-08	1.68737e-08	0
36	4.79831e-07	6.87989e-08	0	1.09105e-08	1.75746e-08	0
37	4.95039e-07	7.10394e-08	0	1.12654e-08	1.83072e-08	0
38	5.10704e-07	7.33509e-08	0	1.16317e-08	1.90728e-08	0
39	5.26828e-07	7.57339e-08	0	1.20094e-08	1.98726e-08	0
40	5.43411e-07	7.81892e-08	0	1.23987e-08	2.07077e-08	0
41	5.60457e-07	8.07174e-08	0	1.27997e-08	2.15794e-08	0
42	5.77967e-07	8.33191e-08	0	1.32125e-08	2.24891e-08	0
43	5.9595e-07	8.59965e-08	0	1.36375e-08	2.3439e-08	0
44	6.14402e-07	8.87489e-08	0	1.40746e-08	2.44299e-08	0
45	6.33321e-07	9.15767e-08	0	1.45239e-08	2.54632e-08	0
46	6.52708e-07	9.44807e-08	0	1.49855e-08	2.65405e-08	0
47	6.72564e-07	9.74614e-08	0	1.54594e-08	2.76633e-08	0
48	6.92889e-07	1.00519e-07	0	1.59459e-08	2.88335e-08	0
49	7.13683e-07	1.03655e-07	0	1.6445e-08	3.00528e-08	0
50	7.34947e-07	1.06869e-07	0	1.69569e-08	3.1323e-08	0
51	7.5668e-07	1.10163e-07	0	1.74817e-08	3.26461e-08	0
52	7.78881e-07	1.13536e-07	0	1.80194e-08	3.4024e-08	0
53	8.0155e-07	1.16989e-07	0	1.85702e-08	3.54589e-08	0
54	8.24686e-07	1.20523e-07	0	1.91342e-08	3.69529e-08	0
55	8.48287e-07	1.24137e-07	0	1.97115e-08	3.85083e-08	0
56	8.72351e-07	1.27834e-07	0	2.03023e-08	4.01274e-08	0
57	8.96877e-07	1.31613e-07	0	2.09066e-08	4.18126e-08	0
58	9.21862e-07	1.35475e-07	0	2.15245e-08	4.35666e-08	0
59	9.47304e-07	1.3942e-07	0	2.21563e-08	4.5392e-08	0
60	9.732e-07	1.43448e-07	0	2.28019e-08	4.72916e-08	0
61	9.99548e-07	1.47561e-07	0	2.34614e-08	4.92683e-08	0
62	1.02634e-06	1.51758e-07	0	2.41351e-08	5.13251e-08	0
63	1.05358e-06	1.56041e-07	0	2.48231e-08	5.34652e-08	0
64	1.08126e-06	1.60409e-07	0	2.55253e-08	5.56919e-08	0
65	1.10938e-06	1.64864e-07	0	2.6242e-08	5.80086e-08	0
66	1.13792e-06	1.69405e-07	0	2.69733e-08	6.04191e-08	0
67	1.1669e-06	1.74033e-07	0	2.77193e-08	6.2927e-08	0
68	1.19629e-06	1.78748e-07	0	2.84802e-08	6.55365e-08	0
69	1.22611e-06	1.83552e-07	0	2.9256e-08	6.82516e-08	0
70	1.25633e-06	1.88445e-07	0	3.00468e-08	7.10767e-08	0
71	1.28696e-06	1.93427e-07	0	3.0853e-08	7.40166e-08	0
72	1.31799e-06	1.98499e-07	0	3.16745e-08	7.7076e-08	0
73	1.34942e-06	2.03661e-07	0	3.25115e-08	8.026e-08	0
74	1.38123e-06	2.08915e-07	0	3.33643e-08	8.35741e-08	0
75	1.41342e-06	2.14261e-07	0	3.42328e-08	8.70238e-08	0
76	1.44599e-06	2.19701e-07	0	3.51175e-08	9.06153e-08	0
77	1.47893e-06	2.25234e-07	0	3.60183e-08	9.43547e-08	0
78	1.51223e-06	2.30861e-07	0	3.69355e-08	9.82488e-08	0
79	1.54589e-06	2.36585e-07	0	3.78694e-08	1.02305e-07	0
80	1.57989e-06	2.42407e-07	0	3.882e-08	1.0653e-07	0
81	1.61424e-06	2.48326e-07	0	3.97877e-08	1.10932e-07	0
82	1.64893e-06	2.54346e-07	0	4.07727e-08	1.1552e-07	0
83	1.68394e-06	2.60467e-07	0	4.17753e-08	1.20302e-07	0
84	1.71928e-06	2.66692e-07	0	4.27956e-08	1.25288e-07	0
85	1.75495e-06	2.73024e-07	0	4.38344e-08	1.30492e-07	0
86	1.79092e-06	2.79464e-07	0	4.48917e-08	1.35921e-07	0
87	1.8272e-06	2.86013e-07	0	4.59677e-08	1.41587e-07	0
88	1.86379e-06	2.92675e-07	0	4.70629e-08	1.47501e-07	0
89	1.90067e-06	2.99452e-07	0	4.81775e-08	1.53676e-07	0
90	1.93785e-06	3.06347e-07	0	4.9312e-08	1.60125e-07	0
91	1.97531e-06	3.13364e-07	0	5.04668e-08	1.66862e-07	0
92	2.01306e-06	3.20506e-07	0	5.16423e-08	1.73904e-07	0
93	2.0511e-06	3.27777e-07	0	5.2839e-08	1.81266e-07	0
94	2.08941e-06	3.35181e-07	0	5.40574e-08	1.88964e-07	0
95	2.12801e-06	3.42723e-07	0	5.52982e-08	1.97018e-07	0
96	2.16689e-06	3.50408e-07	0	5.65617e-08	2.05446e-07	0
97	2.20605e-06	3.58241e-07	0	5.78487e-08	2.14268e-07	0
98	2.2455e-06	3.66229e-07	0	5.91598e-08	2.23506e-07	0
99	2.28523e-06	3.74377e-07	0	6.04957e-08	2.33183e-07	0
100	2.32525e-06	3.82693e-07	0	6.18571e-08	2.43322e-07	0
101	2.36557e-06	3.91183e-07	0	6.32448e-08	2.53949e-07	0
102	2.40619e-06	3.99855e-07	0	6.46596e-08	2.65089e-07	0
103	2.44712e-06	4.08717e-07	0	6.61025e-08	2.76772e-07	0
104	2.48837e-06	4.17779e-07	0	6.75742e-08	2.89026e-07	0
105	2.52995e-06	4.27049e-07	0	6.90759e-08	3.01881e-07	0
106	2.57187e-06	4.36537e-07	0	7.06086e-08	3.15371e-07	0
107	2.61414e-06	4.46254e-07	0	7.21733e-08	3.29528e-07	0
108	2.65678e-06	4.56211e-07	0	7.37712e-08	3.44388e-07	0
109	2.69981e-06	4.66419e-07	0	7.54036e-08	3.59987e-07	0
110	2.74324e-06	4.76891e-07	0	7.70718e-08	3.76363e-07	0
111	2.7871e-06	4.87639e-07	0	7.87772e-08	3.93556e-07	0
112	2.8314e-06	4.98677e-07	0	8.05212e-08	4.11606e-07	0
113	2.87617e-06	5.10018e-07	0	8.23054e-08	4.30556e-07	0
114	2.92143e-06	5.21677e-07	0	8.41314e-08	4.5045e-07	0
115	2.96722e-06	5.33669e-07	0	8.6001e-08	4.71331e-07	0
116	3.01356e-06	5.46009e-07	0	8.79159e-08	4.93246e-07	0
117	3.06048e-06	5.58714e-07	0	8.98781e-08	5.16243e-07	0
118	3.10801e-06	5.71799e-07	0	9.18897e-08	5.40368e-07	0
119	3.15619e-06	5.85282e-07	0	9.39527e-08	5.65672e-07	0
120	3.20505e-06	5.9918e-07	0	9.60694e-08	5.92203e-07	0
121	3.25463e-06	6.1351e-07	0	9.82422e-08	6.20012e-07	0
122	3.30498e-06	6.28291e-07	0	1.00474e-07	6.4915e-07	0
123	3.35612e-06	6.43539e-07	0	1.02766e-07	6.79667e-07	0
124	3.40811e-06	6.59274e-07	0	1.05123e-07	7.11614e-07	0
125	3.46098e-06	6.75514e-07	0	1.07547e-07	7.45042e-07	0
126	3.51479e-06	6.92276e-07	0	1.1004e-07	7.80001e-07	0
127	3.56959e-06	7.09588e-07	0	1.12608e-07	8.16567e-07	0
128	3.62542e-06	7.27463e-07	0	1.15254e-07	8.54775e-07	0
129	3.68233e-06	7.45916e-07	0	1.1798e-07	8.94662e-07	0
130	3.74036e-06	7.64964e-07	0	1.2079e-07	9.36274e-07	0
131	3.79957e-06	7.84623e-07	0	1.23688e-07	9.79655e-07	0
132	3.86e-06	8.04911e-07	0	1.26678e-07	1.02485e-06	0
133	3.92171e-06	8.25842e-07	0	1.29765e-07	1.07189e-06	0
134	3.98474e-06	8.47433e-07	0	1.32953e-07	1.12083e-06	0
135	4.04916e-06	8.69696e-07	0	1.36247e-07	1.17168e-06	0
136	4.11501e-06	8.92646e-07	0	1.39652e-07	1.22449e-06	0
137	4.18234e-06	9.16294e-07	0	1.43173e-07	1.27929e-06	0
138	4.25121e-06	9.40653e-07	0	1.46816e-07	1.33609e-06	0
139	4.32166e-06	9.6573e-07	0	1.50586e-07	1.39491e-06	0
140	4.39376e-06	9.91536e-07	0	1.5449e-07	1.45578e-06	0
141	4.46755e-06	1.01808e-06	0	1.58533e-07	1.5187e-06	0
142	4.54308e-06	1.04536e-06	0	1.62721e-07	1.58368e-06	0
143	4.6204e-06	1.07339e-06	0	1.67063e-07	1.65072e-06	0
144	4.69957e-06	1.10216e-06	0	1.71565e-07	1.71983e-06	0
145	4.78063e-06	1.13169e-06	0	1.76233e-07	1.79098e-06	0
146	4.86363e-06	1.16196e-06	0	1.81077e-07	1.86416e-06	0
147	4.94862e-06	1.19298e-06	0	1.86103e-07	1.93937e-06	0
148	5.03565e-06	1.22475e-06	0	1.9132e-07	2.01657e-06	0
149	5.12477e-06	1.25725e-06	0	1.96737e-07	2.09573e-06	0
150	5.21602e-06	1.29048e-06	0	2.02362e-07	2.17682e-06	0
151	5.30946e-06	1.32443e-06	0	2.08205e-07	2.25979e-06	0
152	5.40513e-06	1.35909e-06	0	2.14274e-07	2.34461e-06	0
153	5.50308e-06	1.39446e-06	0	2.20581e-07	2.43122e-06	0
154	5.60337e-06	1.4305e-06	0	2.27135e-07	2.51957e-06	0
155	5.70603e-06	1.46723e-06	0	2.33946e-07	2.6096e-06	0
156	5.81113e-06	1.5046e-06	0	2.41025e-07	2.70124e-06	0
157	5.91872e-06	1.54262e-06	0	2.48384e-07	2.79443e-06	0
158	6.02885e-06	1.58126e-06	0	2.56034e-07	2.8891e-06	0
159	6.14158e-06	1.62051e-06	0	2.63986e-07	2.98518e-06	0
160	6.25698e-06	1.66034e-06	0	2.72253e-07	3.08258e-06	0
161	6.3751e-06	1.70073e-06	0	2.80848e-07	3.18124e-06	0
162	6.49602e-06	1.74167e-06	0	2.89783e-07	3.28108e-06	0
163	6.61981e-06	1.78314e-06	0	2.9907e-07	3.38202e-06	0
164	6.74655e-06	1.82512e-06	0	3.08725e-07	3.48397e-06	0
165	6.87633e-06	1.86759e-06	0	3.18759e-07	3.58687e-06	0
166	7.00922e-06	1.91053e-06	0	3.29188e-07	3.69064e-06	0
167	7.14534e-06	1.95393e-06	0	3.40025e-07	3.79519e-06	0
168	7.28478e-06	1.99777e-06	0	3.51286e-07	3.90048e-06	0
169	7.42771e-06	2.04204e-06	0	3.6299e-07	4.00642e-06	0
170	7.57423e-06	2.08672e-06	0	3.75153e-07	4.11296e-06	0
171	7.72446e-06	2.13181e-06	0	3.87784e-07	4.22003e-06	0
172	7.87853e-06	2.1773e-06	0	4.009e-07	4.32758e-06	0
173	8.03659e-06	2.22318e-06	0	4.14516e-07	4.43557e-06	0
174	8.19882e-06	2.26945e-06	0	4.28648e-07	4.54395e-06	0
175	8.36538e-06	2.31612e-06	0	4.43311e-07	4.6527e-06	0
176	8.53648e-06	2.36321e-06	0	4.58521e-07	4.76178e-06	0
177	8.71232e-06	2.41075e-06	0	4.74291e-07	4.87119e-06	0
178	8.89311e-06	2.45883e-06	0	4.90635e-07	4.9809e-06	0
179	9.07908e-06	2.50756e-06	0	5.07561e-07	5.09092e-06	0
180	9.27048e-06	2.55717e-06	0	5.25072e-07	5.20122e-06	0
181	9.46754e-06	2.60806e-06	0	5.43161e-07	5.3118e-06	0
182	9.67051e-06	2.6609e-06	0	5.61804e-07	5.4226e-06	0
183	9.87963e-06	2.7168e-06	0	5.80952e-07	5.53354e-06	0
184	1.00951e-05	2.77757e-06	0	6.00509e-07	5.64446e-06	0
185	1.0317e-05	2.84608e-06	0	6.20319e-07	5.75509e-06	0
186	1.05454e-05	2.92677e-06	0	6.4013e-07	5.86499e-06	0
187	1.07803e-05	3.02625e-06	0	6.59556e-07	5.97345e-06	0
188	1.10212e-05	3.1542e-06	0	6.7803e-07	6.07943e-06	0
189	1.12676e-05	3.32419e-06	0	6.94745e-07	6.18141e-06	0
190	1.15185e-05	3.55478e-06	0	7.08593e-07	6.27731e-06	0
191	1.17726e-05	3.87041e-06	0	7.18112e-07	6.36436e-06	0
192	1.2028e-05	4.30203e-06	0	7.21443e-07	6.43899e-06	0
193	1.22823e-05	4.88732e-06	0	7.16319e-07	6.49687e-06	0
194	1.25329e-05	5.66995e-06	0	7.00103e-07	6.53292e-06	0
195	1.27767e-05	6.6978e-06	0	6.69895e-07	6.54156e-06	0
196	1.3011e-05	8.01983e-06	0	6.22714e-07	6.51704e-06	0
197	1.3233e-05	9.68144e-06	0	5.55774e-07	6.454e-06	0
198	1.34414e-05	1.17185e-05	0	4.66829e-07	6.34814e-06	0
199	1.36362e-05	1.41506e-05	0	3.54589e-07	6.19702e-06	0
200	1.38194e-05	1.69736e-05	0	2.19132e-07	6.00088e-06	0
201	1.3996e-05	2.01535e-05	0	6.2285e-08	5.76337e-06	0
202	1.41705e-05	2.36196e-05	0	0	5.49245e-06	0
203	1.43553e-05	2.72685e-05	0	0	5.19966e-06	0
204	1.45672e-05	3.09642e-05	0	0	4.90021e-06	0
205	1.48232e-05	3.45428e-05	0	0	4.61246e-06	0
206	1.51423e-05	3.78255e-05	0	0	4.35635e-06	0
207	1.55442e-05	4.06328e-05	0	0	4.15174e-06	0
208	1.60475e-05	4.2801e-05	0	0	4.01645e-06	0
209	1.66688e-05	4.41979e-05	0	0	3.96435e-06	0
210	1.74215e-05	4.4737e-05	0	0	4.00381e-06	0
211	1.83165e-05	4.43771e-05	0	0	4.13749e-06	0
212	1.93592e-05	4.31462e-05	0	0	4.35977e-06	0
213	2.05486e-05	4.114e-05	0	0	4.65709e-06	0
214	2.18822e-05	3.84892e-05	0	0	5.01146e-06	0
215	2.33555e-05	3.53566e-05	0	0	5.40089e-06	0
216	2.49628e-05	3.19211e-05	0	0	5.80135e-06	0
217	2.66991e-05	2.83613e-05	0	0	6.1887e-06	0
218	2.85609e-05	2.4841e-05	0	0	6.54042e-06	0
219	3.05469e-05	2.14977e-05	0	0	6.83701e-06	0
220	3.2657e-05	1.84347e-05	0	5.17264e-08	7.063e-06	0
221	3.48974e-05	1.57219e-05	0	1.03005e-07	7.20687e-06	0
222	3.72761e-05	1.33942e-05	0	1.12102e-07	7.26133e-06	0
223	3.98021e-05	1.14561e-05	0	7.75411e-08	7.22293e-06	0
224	4.24851e-05	9.88835e-06	0	0	7.09135e-06	0
225	4.53319e-05	8.65291e-06	0	0	6.86895e-06	0
226	4.83542e-05	7.70657e-06	0	0	6.55912e-06	0
227	5.15606e-05	7.00136e-06	0	0	6.16647e-06	0
228	5.49572e-05	6.49111e-06	0	0	5.69611e-06	0
229	5.85482e-05	6.13498e-06	0	0	5.15332e-06	0
230	6.23343e-05	5.8998e-06	0	0	4.54336e-06	0
231	6.63137e-05	5.7614e-06	0	0	3.87133e-06	0
232	7.04811e-05	5.70535e-06	0	0	3.14215e-06	0
233	7.48278e-05	5.7272e-06	0	0	2.36053e-06	0
234	7.9342e-05	5.83258e-06	0	0	1.53096e-06	0
235	8.40089e-05	6.03708e-06	0	0	6.57637e-07	0
236	8.86932e-05	6.25236e-06	0	0	0	0
237	9.31736e-05	6.31772e-06	0	0	0	0
238	9.77301e-05	6.56904e-06	0	0	0	0
239	0.00010234	7.05484e-06	0	0	0	0
240	0.000106979	7.82539e-06	0	0	0	0
241	0.000111623	8.92785e-06	0	0	0	0
242	0.000116251	1.04004e-05	0	0	0	0
243	0.000120843	1.22653e-05	0	0	0	0
244	0.000125383	1.45222e-05	0	0	0	0
245	0.000129861	1.71419e-05	0	0	0	0
246	0.000134276	2.00618e-05	0	0	0	0
247	0.000138629	2.31851e-05	0	0	0	0
248	0.000142931	2.63828e-05	0	0	0	0
249	0.0001472	2.95006e-05	0	0	0	0
250	0.000151456	3.23696e-05	0	0	0	0
251	0.000155724	3.48201e-05	0	0	0	0
252	0.000160027	3.66973e-05	0	0	0	0
253	0.000164389	3.78697e-05	0	0	0	0
254	0.000168829	3.82498e-05	0	0	0	0
255	0.000173358	3.78211e-05	0	0	0	0
256	0.000177985	3.66113e-05	0	0	0	0
257	0.000182708	3.46997e-05	0	0	0	0
258	0.000187523	3.22081e-05	0	0	0	0
259	0.000192422	2.92879e-05	0	0	0	0
260	0.000197395	2.61049e-05	0	0	0	0
261	0.000202433	2.2824e-05	0	0	0	0
262	0.000207528	1.95959e-05	0	0	0	0
263	0.000212675	1.65458e-05	0	0	0	0
264	0.000217874	1.37678e-05	0	0	0	0
265	0.000223128	1.13222e-05	0	0	0	0
266	0.000228445	9.23713e-06	0	0	0	0
267	0.000233835	7.51252e-06	0	0	0	0
268	0.000239311	6.12647e-06	0	0	0	0
269	0.000244888	5.04191e-06	0	0	0	0
270	0.000250581	4.21306e-06	0	0	0	0
271	0.000256403	3.59106e-06	0	0	0	0
272	0.00026237	3.12834e-06	0	0	0	0
273	0.000268493	2.7816e-06	0	0	0	0
274	0.000274785	2.5135e-06	0	0	0	0
275	0.000281256	2.29345e-06	0	0	0	0
276	0.000287914	2.09758e-06	0	0	0	0
277	0.000294769	1.90843e-06	0	0	0	0
278	0.000301826	1.71442e-06	0	0	0	0
279	0.00030909	1.50945e-06	0	0	0	0
280	0.000316567	1.2927e-06	0	0	0	0
281	0.000324258	1.06876e-06	0	0	0	0
282	0.000332165	8.47907e-07	0	0	0	0
283	0.000340285	6.46727e-07	0	0	0	0
284	0.000348616	4.88632e-07	0	0	0	0
285	0.000357151	4.04268e-07	0	0	0	0
286	0.000365882	4.31421e-07	0	0	0	0
287	0.000374798	6.14145e-07	0	0	0	0
288	0.000383886	1.0008e-06	0	0	0	0
289	0.00039313	1.6408e-06	0	0	0	0
290	0.000402513	2.57992e-06	0	0	0	0
291	0.000412021	3.85442e-06	0	0	0	0
292	0.000421637	5.48435e-06	0	0	0	0
293	0.00043135	7.46674e-06	0	0	0	0
294	0.00044115	9.76972e-06	0	0	0	0
295	0.000451033	1.23296e-05	0	0	0	0
296	0.000461002	1.50461e-05	0	0	0	0
297	0.00047106	1.77849e-05	0	0	0	0
298	0.000481217	2.03937e-05	0	0	0	0
299	0.000491487	2.27099e-05	0	0	0	0
300	0.000501882	2.45754e-05	0	0	0	0
301	0.000512416	2.58521e-05	0	0	0	0
302	0.000523098	2.64375e-05	0	0	0	0
303	0.000533934	2.62765e-05	0	0	0	0
304	0.000544921	2.53691e-05	0	0	0	0
305	0.000556053	2.37723e-05	0	0	0	0
306	0.000567317	2.15958e-05	0	0	0	0
307	0.000578697	1.89925e-05	0	0	0	0
308	0.000590172	1.61443e-05	0	0	0	0
309	0.000601721	1.32459e-05	0	0	0	0
310	0.000613327	1.04886e-05	0	0	0	0
311	0.000624974	8.0451e-06	0	0	0	0
312	0.000636559	5.96936e-06	0	0	1.98763e-07	0
313	0.000647822	4.11894e-06	0	0	1.15072e-06	0
314	0.00065915	2.93211e-06	0	0	2.01064e-06	0
315	0.000670557	2.43664e-06	0	0	2.76301e-06	0
316	0.000682054	2.62028e-06	0	0	3.39757e-06	0
317	0.000693496	2.2693e-06	3.68448e-06	0	3.72545e-06	0
318	0.000705055	2.44099e-06	7.49301e-06	0	3.92198e-06	0
319	0.000716758	3.12995e-06	1.11651e-05	0	4.00124e-06	0
320	0.000728623	4.26365e-06	1.46267e-05	0	3.96984e-06	0
321	0.000740667	5.77131e-06	1.77969e-05	0	3.83549e-06	0
322	0.000752905	7.58871e-06	2.05924e-05	0	3.60573e-06	0
323	0.000765353	9.66033e-06	2.29341e-05	0	3.28689e-06	0
324	0.000778022	1.19391e-05	2.47537e-05	0	2.88318e-06	0
325	0.000790924	1.43836e-05	2.60017e-05	0	2.39607e-06	0
326	0.00080407	1.69538e-05	2.66536e-05	0	1.82406e-06	0
327	0.00081747	1.96051e-05	2.67157e-05	0	1.16279e-06	0
328	0.000831131	2.22837e-05	2.62277e-05	0	4.05564e-07	0
329	0.000844859	2.47404e-05	2.52013e-05	0	0	0
330	0.000858632	2.68676e-05	2.37311e-05	0	0	0
331	0.000872636	2.87284e-05	2.19978e-05	0	0	0
332	0.000886875	3.0217e-05	2.0141e-05	0	0	0
333	0.00090135	3.12301e-05	1.83027e-05	0	0	0
334	0.000916062	3.16778e-05	1.66148e-05	0	0	0
335	0.000931008	3.14958e-05	1.51875e-05	0	0	0
336	0.000946182	3.06562e-05	1.40991e-05	0	0	0
337	0.000961576	2.91726e-05	1.33906e-05	0	0	0
338	0.000977178	2.7102e-05	1.30649e-05	0	0	0
339	0.000992963	2.45672e-05	1.30705e-05	0	0	0
340	0.00100891	2.17153e-05	1.33296e-05	0	0	0
341	0.00102499	1.87183e-05	1.37393e-05	0	0	0
342	0.00104116	1.5757e-05	1.41839e-05	0	0	0
343	0.00105741	1.30047e-05	1.45456e-05	0	0	0
344	0.00107369	1.06112e-05	1.47166e-05	0	0	0
345	0.00108998	8.68821e-06	1.46084e-05	0	0	0
346	0.00110624	7.29899e-06	1.41579e-05	0	0	0
347	0.00112244	6.45217e-06	1.33315e-05	0	0	0
348	0.00113857	6.10075e-06	1.21258e-05	0	0	0
349	0.00115462	6.14635e-06	1.05644e-05	0	0	0
350	0.00117055	6.44861e-06	8.69436e-06	0	0	0
351	0.00118638	6.83903e-06	6.57968e-06	0	0	0
352	0.00120209	7.13789e-06	4.29482e-06	0	0	0
353	0.00121768	7.17285e-06	1.9181e-06	0	0	0
354	0.00123313	6.63624e-06	0	0	0	0
355	0.00124833	4.95094e-06	0	0	0	0
356	0.00126342	2.73399e-06	0	0	0	0
357	0.0012784	5.47833e-09	0	0	0	0
358	0.00129281	0	0	0	0	0
359	0.00130707	0	0	0	0	0
360	0.00132122	0	0	0	0	0
361	0.00133528	0	0	0	0	0
362	0.00134932	0	0	0	0	0
363	0.00136339	0	0	0	0	0
364	0.00137755	0	0	0	0	0
365	0.00139188	0	0	0	0	0
366	0.00140645	0	0	0	0	0
367	0.00142136	0	0	0	0	0
368	0.00142686	0	0	0	0	9.59356e-06
369	0.00143169	0	0	0	0	2.03613e-05
370	0.00143709	0	0	0	0	3.11719e-05
371	0.00144329	0	0	0	0	4.19272e-05
372	0.00145048	0	0	0	0	5.25257e-05
373	0.00145889	0	0	0	0	6.28641e-05
374	0.00146872	0	0	0	0	7.28395e-05
375	0.00148019	0	0	0	0	8.23505e-05
376	0.00149349	0	0	0	0	9.12984e-05
377	0.00150882	0	0	0	0	9.95879e-05
378	0.00152638	0	0	0	0	0.000107128
379	0.00154634	0	0	0	0	0.000113831
380	0.00156892	0	0	0	0	0.000119595
381	0.00159422	0	0	0	0	0.000124363
382	0.00162239	0	0	0	0	0.000128066
383	0.00165352	0	0	0	0	0.000130642
384	0.00168773	0	0	0	0	0.000132039
385	0.00172509	0	0	0	0	0.00013221
386	0.00176565	0	0	0	0	0.000131122
387	0.00180943	0	0	0	0	0.000128751
388	0.00185644	0	0	0	0	0.000125083
389	0.00190663	0	0	0	0	0.000120119
390	0.00195994	0	0	0	0	0.000113874
391	0.00201626	0	0	0	0	0.000106376
392	0.00207546	0	0	0	0	9.76684e-05
393	0.00213735	0	0	0	0	8.78116e-05
394	0.00220171	0	0	0	0	7.6881e-05
395	0.00226829	0	0	0	0	6.4968e-05
396	0.00233679	0	0	0	0	5.21803e-05
397	0.00240686	0	0	0	0	3.86406e-05
398	0.00247815	0	0	0	0	2.44862e-05
399	0.00255023	0	0	0	0	9.86781e-06
400	0.0026175	0	0	0	0	0
401	0.00267441	0	0	0	0	0
402	0.00273078	0	0	0	0	0
403	0.0027863	0	0	0	0	0
404	0.00284066	0	0	0	0	0
405	0.0028933	0	1.84811e-06	0	0	0
406	0.00294439	0	1.52169e-06	0	0	0
407	0.0029935	0	0	0	0	0
408	0.00304	0	0	0	0	0
409	0.00308378	0	0	0	0	0
410	0.00312459	0	0	0	0	0
411	0.00316217	0	0	0	0	0
412	0.00319631	0	0	0	0	0
413	0.00322683	0	0	0	0	0
414	0.00325356	0	0	0	0	0
415	0.00327641	0	0	0	0	0
416	0.00329528	0	0	0	0	0
417	0.00331014	0	0	0	0	0
418	0.00332098	0	0	0	0	0
419	0.00332784	0	0	0	0	0
420	0.0033308	0	0	0	0	0
421	0.00332996	0	0	0	0	0
422	0.00332416	0	0	3.74538e-05	0	0
423	0.00331307	0	0	0.000130407	0	0
424	0.00329929	0	9.32614e-07	0.00020117	0	0
425	0.00328306	0	9.37708e-06	0.000224093	0	0
426	0.00326551	0	1.99522e-05	0.000191165	0	0
427	0.00324511	1.34088e-05	2.73351e-05	0.000115103	0	0
428	0.00321622	3.20844e-05	3.19928e-05	2.28103e-05	0	5.98656e-06
429	0.00317177	4.82089e-05	3.2299e-05	0	0	2.37324e-05
430	0.00312454	6.36618e-05	3.16065e-05	0	0	4.18119e-05
431	0.00307566	7.83292e-05	3.06085e-05	0	0	6.00078e-05
432	0.00302553	9.19236e-05	2.92573e-05	0	0	7.81945e-05
433	0.00297455	0.000104197	2.74975e-05	0	0	9.62544e-05
434	0.00292306	0.000114948	2.52734e-05	0	0	0.000114078
435	0.00287138	0.000124023	2.25382e-05	0	0	0.000131566
436	0.0028198	0.00013131	1.92635e-05	0	0	0.000148628
437	0.00276847	0.000136701	1.53295e-05	3.72543e-06	0	0.000165195
438	0.00271492	0.000139389	8.0124e-06	9.7518e-05	0	0.000181517
439	0.00266226	0.000140187	4.06963e-07	0.00018667	0	0.000197185
440	0.00261134	0.000137109	0	0.000243662	2.3933e-07	0.000211658
441	0.00256255	0.000132047	0	0.000249546	2.6744e-06	0.000224736
442	0.00251659	0.000126296	0	0.000203515	4.64005e-06	0.000237067
443	0.00247292	0.000119632	0	0.000123997	6.16915e-06	0.000248672
444	0.0024307	0.000111716	0	3.77817e-05	7.31515e-06	0.000259588
445	0.00238818	0.000101687	0	0	8.20627e-06	0.000269901
446	0.00234566	9.00783e-05	0	0	8.7923e-06	0.000279604
447	0.00230433	7.80244e-05	0	0	8.95065e-06	0.000288653
448	0.00226413	6.59227e-05	0	0	8.66421e-06	0.000297057
449	0.00222502	5.41796e-05	0	0	7.92239e-06	0.00030482
450	0.00218693	4.31823e-05	0	0	6.72455e-06	0.000311938
451	0.00214981	3.327e-05	0	0	5.08301e-06	0.000318404
452	0.00211361	2.47064e-05	0	0	3.02529e-06	0.000324204
453	0.00207829	1.76604e-05	0	0	5.94996e-07	0.000329318
454	0.00204336	1.13539e-05	0	0	0	0.000333201
455	0.00200907	6.25795e-06	0	0	0	0.00033615
456	0.00197557	2.49966e-06	0	0	0	0.000338311
457	0.00194285	0	0	0	0	0.000339683
458	0.00191082	0	0	0	0	0.000340173
459	0.00187965	0	0	0	0	0.000339981
460	0.0018493	0	0	0	0	0.00033913
461	0.00181974	0	0	0	0	0.000337653
462	0.00179071	0	0	6.98705e-06	0	0.000335599
463	0.00176034	0	0	7.60424e-05	0	0.000333056
464	0.00172989	0	0	0.000167417	0	0.000330057
465	0.00169987	0	0	0.000263745	0	0.000326666
466	0.00167111	0	0	0.000337777	0	0.000322936
467	0.00164439	0	0	0.000364528	0	0.000318914
468	0.00161995	0	0	0.000335422	0	0.00031465
469	0.00159733	0	0	0.000263491	0	0.000310196
470	0.00157562	0	0	0.000175479	0	0.000305607
471	0.00155396	0	0	9.76227e-05	0	0.000300924
472	0.0015318	0	0	4.59426e-05	0	0.000296179
473	0.00150897	0	0	2.59805e-05	0	0.00029139
474	0.00148545	0	0	3.83506e-05	0	0.000286569
475	0.00146124	0	0	8.29173e-05	0	0.000281726
476	0.00143644	0	0	0.000157293	0	0.000276866
477	0.00141136	0	0	0.000251332	0	0.000271992
478	0.00138672	0	0	0.000344078	0	0.0002671
479	0.00136337	0	0	0.000409245	0	0.000262187
480	0.00134192	0	0	0.000428637	0	0.00025725
481	0.00132227	0	0	0.000404669	0	0.000252304
482	0.00130364	0	0	0.000361625	0	0.000247375
483	0.00128492	0	0	0.000333009	0	0.000242494
484	0.00126534	0	0	0.000342577	0	0.000237686
485	0.00124487	0	0	0.000390762	0	0.000232963
486	0.00122429	0	0	0.00045453	0	0.000228322
487	0.00120442	3.86045e-06	0	0.000500636	0	0.000223454
488	0.00118616	1.00917e-05	0	0.000505628	0	0.000218465
489	0.00116946	1.47734e-05	9.12694e-06	0.000468494	0	0.00021296
490	0.00115375	1.97689e-05	2.04119e-05	0.000412679	0	0.00020734
491	0.00113801	2.49786e-05	3.23776e-05	0.00037148	0	0.000201736
492	0.00112148	3.01834e-05	4.44085e-05	0.000371495	0	0.000196216
493	0.00110395	3.53452e-05	5.65691e-05	0.000420349	0	0.000190766
494	0.00108593	4.06381e-05	6.97141e-05	0.000503285	0	0.00018528
495	0.00106843	4.63947e-05	8.52863e-05	0.000589417	0	0.00017958
496	0.00105253	5.29812e-05	0.000104861	0.000645951	0	0.000173472
497	0.00103884	6.06553e-05	0.000129626	0.000654493	0	0.000166805
498	0.00102727	6.9486e-05	0.000160081	0.000620262	0	0.000159507
499	0.0010171	7.93845e-05	0.000196148	0.000568579	0	0.00015157
500	0.00100734	9.02103e-05	0.000237543	0.000532642	0	0.000143008
501	0.000997127	0.00010186	0.000284086	0.000542747	0	0.000133824
502	0.00098576	0.000114286	0.000335744	0.000623157	0	0.000124001
503	0.000972699	0.000127469	0.000392529	0.000793085	0	0.000113516
504	0.000957656	0.00014143	0.000454508	0.00106341	0	0.00010234
505	0.000940921	0.000156303	0.000522045	0.00142621	0	9.04109e-05
506	0.000923678	0.000172427	0.000596152	0.00184515	0	7.75905e-05
507	0.000907845	0.000190223	0.000677956	0.00225883	0	6.37324e-05
508	0.000895105	0.000209964	0.00076795	0.00261333	0	4.87665e-05
509	0.000885867	0.00023149	0.00086497	0.00289572	0	3.28156e-05
510	0.000878751	0.000254063	0.000965716	0.00315052	0	1.62526e-05
511	0.000870713	0.000276472	0.00106531	0.00346386	0	0
512	0.000843899	0.00029504	0.00115619	0.00392445	0	0
513	0.000813052	0.00031159	0.00123747	0.00458414	0	0
514	0.000778275	0.000325734	0.00130718	0.00544611	0	0
515	0.0007405	0.000337356	0.00136449	0.00648242	0	0
516	0.000700363	0.000346273	0.00140842	0.00767507	0	0
517	0.000657067	0.000351877	0.0014365	0.00905766	0	0
518	0.00060809	0.000353039	0.00144436	0.0107265	0	0
519	0.000550312	0.000348434	0.00142697	0.0127992	0	0
520	0.000482178	0.000337192	0.00138107	0.0153363	0	0
521	0.000405395	0.000319419	0.00130719	0.0182787	0	0
522	0.000324685	0.000296149	0.00120943	0.0214564	0	0
523	0.000245477	0.000268685	0.00109299	0.0246723	0	0
524	0.000171162	0.000237823	0.000961198	0.0278024	0	0
525	0.000101891	0.000203531	0.000814275	0.0308381	0	0
526	3.56132e-05	0.000165298	0.000650692	0.0338487	0	0
527	0	0.000114994	0.000464787	0.0368923	0	0
528	0	5.19367e-05	0.000258395	0.0399495	0	0
529	0	0	4.08373e-05	0.0428835	0	0
530	0	0	0	0.0454028	0	0
531	0	0	0	0.0472057	0	0
532	0	0	0	0.0480187	0	0
533	0	0	0	0.0477008	0	0
534	0	0	0	0.0462623	0	0
535	0	0	0	0.0438054	0	0
536	0	0	0	0.0404731	0	0
537	9.96763e-05	0	0	0.036438	0	0
538	0.000246419	0	0	0.0320016	0	0
539	0.000393979	0	0	0.0275394	0	0
540	0.000531015	0	0	0.0234024	0	0
541	0.00065003	0	0	0.0198224	0	0
542	0.000748792	0	0	0.0168682	0	0
543	0.00082956	0	0	0.0144691	0	0
544	0.000897186	0	0	0.0124747	0	0
545	0.000957057	0	0	0.0107179	0	0
546	0.00101334	0	0	0.00906983	0	0
547	0.00106778	0	0	0.0074765	0	0
548	0.00111936	0	0	0.00597023	0	0
549	0.00116505	0	0	0.00464604	0	0
550	0.00119948	1.36538e-05	0	0.00360797	0	0
551	0.00122312	2.48095e-05	0	0.00291711	0	0
552	0.00123711	3.11237e-05	0	0.00254931	0	0
553	0.00124464	3.43928e-05	0	0.00239843	0	0
554	0.00124993	3.70532e-05	0	0.00232407	0	0
555	0.00125624	4.0953e-05	0	0.0022171	0	0
556	0.0012647	4.65726e-05	0	0.00204158	0	0
557	0.00127445	5.31587e-05	0	0.00182829	0	0
558	0.00128396	5.95612e-05	0	0.0016309	0	0
559	0.00129236	6.50963e-05	0	0.00148057	0	0
560	0.00129989	6.98619e-05	0	0.00136928	0	0
561	0.0013075	7.4419e-05	0	0.00126655	0	0
562	0.00131586	7.92176e-05	0	0.00114938	0	0
563	0.00132495	8.42622e-05	0	0.00101934	0	0
564	0.00133422	8.92392e-05	0	0.000895015	0	0
565	0.00134326	9.3906e-05	0	0.000790579	0	0
566	0.0013522	9.83333e-05	0	0.000702304	0	0
567	0.00136151	0.000102787	0	0.000614338	0	0
568	0.00137154	0.000107412	0	0.000515333	0	0
569	0.00138222	0.000112032	0	0.000408835	0	0
570	0.00139313	0.000116221	0	0.000309691	0	0
571	0.00140387	0.000119519	0	0.000233102	0	0
572	0.00141421	0.000121575	0	0.000187305	0	0
573	0.00142416	0.000122152	0	0.000174142	0	0
574	0.00143375	0.000121054	0	0.000193396	0	0
575	0.00144303	0.000118113	0	0.000244457	0	0
576	0.00145218	0.000113272	0	0.000322667	0	0
577	0.00146163	0.000106703	0	0.000413679	0	0
578	0.00147213	9.88309e-05	0	0.000492662	0	0
579	0.00148448	9.01823e-05	0	0.000532644	0	0
580	0.00149912	8.11253e-05	0	0.000518296	0	0
581	0.00151587	7.16917e-05	0	0.000454967	0	0
582	0.00153403	6.16284e-05	0	0.000365405	0	0
583	0.00155274	5.06293e-05	0	0.000276662	0	0
584	0.00157143	3.85613e-05	0	0.000207271	0	0
585	0.00158987	2.5537e-05	0	0.000162613	0	0
586	0.00160812	1.18356e-05	0	0.000138457	0	0
587	0.00162601	0	0	0.000127155	0	0
588	0.00164225	0	0	0.000121758	0	0
589	0.00165861	0	0	0.000119121	0	0
590	0.00167509	0	0	0.000117428	0	0
591	0.00169163	0	0	0.000115977	0	0
592	0.00170815	0	0	0.000114561	0	0
593	0.00172455	0	0	0.000113132	0	0
594	0.00174073	0	0	0.000111686	0	0
595	0.00175658	0	0	0.000110228	0	0
596	0.00177198	0	0	0.000108765	0	0
597	0.00178681	0	0	0.000107302	0	0
598	0.00180096	0	0	0.000105844	0	0
599	0.0018143	0	0	0.000104395	0	0
600	0.00182672	0	0	0.000102955	0	0
601	0.00183809	0	0	0.000101524	0	0
602	0.00184831	0	0	0.0001001	0	0
603	0.00185727	0	0	9.86814e-05	0	0
604	0.00186489	0	0	9.7263e-05	0	0
605	0.00187106	0	0	9.58402e-05	0	0
606	0.00187573	0	0	9.44074e-05	0	0
607	0.00187882	0	0	9.29593e-05	0	0
608	0.00188028	0	0	9.14905e-05	0	0
609	0.00188008	0	0	8.99963e-05	0	0
610	0.0018782	0	0	8.84726e-05	0	0
611	0.00187462	0	0	8.69166e-05	0	0
612	0.00186936	0	0	8.53266e-05	0	0
613	0.00186243	0	0	8.37021e-05	0	0
614	0.00185386	0	0	8.20442e-05	0	0
615	0.00184369	0	0	8.03551e-05	0	0
616	0.00183199	0	0	7.86383e-05	0	0
617	0.00181882	0	0	7.68981e-05	0	0
618	0.00180426	0	0	7.514e-05	0	0
619	0.00178837	0	0	7.33699e-05	0	0
620	0.00177127	0	0	7.15945e-05	0	0
621	0.00175303	0	0	6.98205e-05	0	0
622	0.00173376	0	0	6.80547e-05	0	0
623	0.00171355	0	0	6.6304e-05	0	0
624	0.00169251	0	0	6.45751e-05	0	0
625	0.00167072	0	0	6.28742e-05	0	0
626	0.00164827	0	0	6.12075e-05	0	0
627	0.00162526	0	0	5.95806e-05	0	0
628	0.00160177	0	0	5.79987e-05	0	0
629	0.00157787	0	0	5.64665e-05	0	0
630	0.00155363	0	0	5.49886e-05	0	0
631	0.00152911	0	0	5.35688e-05	0	0
632	0.00150434	0	0	5.22112e-05	0	0
633	0.00147938	0	0	5.09192e-05	0	0
634	0.00145426	0	0	4.96943e-05	0	0
635	0.001429	0	0	4.85387e-05	0	0
636	0.00140363	0	0	4.74536e-05	0	0
637	0.00137815	0	0	4.64398e-05	0	0
638	0.00135256	0	0	4.54975e-05	0	0
639	0.00132688	0	0	4.46262e-05	0	0
640	0.00130111	0	0	4.38245e-05	0	0
641	0.00127525	0	0	4.30906e-05	0	0
642	0.00124929	0	0	4.24219e-05	0	0
643	0.00122325	0	0	4.1815e-05	0	0
644	0.00119713	0	0	4.12661e-05	0	0
645	0.00117095	0	0	4.07706e-05	0	0
646	0.0011447	0	0	4.03237e-05	0	0
647	0.00111842	0	0	3.99201e-05	0	0
648	0.00109213	0	0	3.95543e-05	0	0
649	0.00106585	0	0	3.92206e-05	0	0
650	0.00103962	0	0	3.89133e-05	0	0
651	0.00101347	0	0	3.86269e-05	0	0
652	0.000987437	0	0	3.83561e-05	0	0
653	0.000961569	0	0	3.8096e-05	0	0
654	0.000935906	0	0	3.7842e-05	0	0
655	0.00091049	0	0	3.75903e-05	0	0
656	0.000885364	0	0	3.73375e-05	0	0
657	0.00086057	0	0	3.70808e-05	0	0
658	0.000836149	0	0	3.68182e-05	0	0
659	0.000812139	0	0	3.65482e-05	0	0
660	0.000788576	0	0	3.62702e-05	0	0
661	0.000765493	0	0	3.59838e-05	0	0
662	0.000742917	0	0	3.56895e-05	0	0
663	0.000720876	0	0	3.5388e-05	0	0
664	0.000699389	0	0	3.50807e-05	0	0
665	0.000678477	0	0	3.47689e-05	0	0
666	0.000658152	0	0	3.44545e-05	0	0
667	0.000638427	0	0	3.41393e-05	0	0
668	0.000619308	0	0	3.38252e-05	0	0
669	0.000600802	0	0	3.35141e-05	0	0
670	0.00058291	0	0	3.32077e-05	0	0
671	0.000565633	0	0	3.29077e-05	0	0
672	0.000548968	0	0	3.26154e-05	0	0
673	0.000532911	0	0	3.23321e-05	0	0
674	0.000517462	0	0	3.20587e-05	0	0
675	0.000502046	0	0	3.17918e-05	1.09132e-06	0
676	0.000486742	0	0	3.15321e-05	3.08968e-06	0
677	0.000472127	0	0	3.12843e-05	4.87884e-06	0
678	0.00045765	0	0	3.1052e-05	6.27326e-06	6.22579e-07
679	0.000442326	0	0	3.08421e-05	6.93101e-06	2.99216e-06
680	0.000427817	0	0	3.06417e-05	7.46772e-06	5.1637e-06
681	0.000414101	0	0	3.04503e-05	7.89059e-06	7.14273e-06
682	0.000401155	0	0	3.0267e-05	8.20679e-06	8.93501e-06
683	0.000388958	0	0	3.00912e-05	8.42347e-06	1.05466e-05
684	0.000377486	0	0	2.9922e-05	8.54773e-06	1.19837e-05
685	0.000366713	0	0	2.97586e-05	8.58669e-06	1.32532e-05
686	0.000356613	0	0	2.96001e-05	8.54749e-06	1.4362e-05
687	0.00034716	0	0	2.94458e-05	8.43729e-06	1.53179e-05
688	0.000338325	0	0	2.92949e-05	8.26331e-06	1.61287e-05
689	0.000330078	0	0	2.91469e-05	8.03286e-06	1.68031e-05
690	0.000322387	0	0	2.9001e-05	7.7533e-06	1.73501e-05
691	0.000315221	0	0	2.88567e-05	7.43207e-06	1.77794e-05
692	0.000308545	0	0	2.87136e-05	7.07666e-06	1.81008e-05
693	0.000302325	0	0	2.85712e-05	6.69459e-06	1.8325e-05
694	0.000296526	0	0	2.84291e-05	6.29337e-06	1.84626e-05
695	0.000291112	0	0	2.82871e-05	5.88044e-06	1.85246e-05
696	0.000286047	0	0	2.8145e-05	5.46312e-06	1.85222e-05
697	0.000281296	0	0	2.80024e-05	5.04854e-06	1.84663e-05
698	0.000276822	0	0	2.78591e-05	4.64355e-06	1.8368e-05
699	0.000272592	0	0	2.77151e-05	4.25468e-06	1.82378e-05
700	0.000268573	0	0	2.75702e-05	3.888e-06	1.80858e-05
701	0.000264735	0	0	2.74243e-05	3.54911e-06	1.79215e-05
702	0.000261049	0	0	2.72773e-05	3.24301e-06	1.77538e-05
703	0.000257489	0	0	2.71292e-05	2.97403e-06	1.75904e-05
704	0.000254033	0	0	2.69798e-05	2.74581e-06	1.74383e-05
705	0.000250659	0	0	2.68292e-05	2.56121e-06	1.73034e-05
706	0.000247353	0	0	2.66774e-05	2.4223e-06	1.71902e-05
707	0.0002441	0	0	2.65242e-05	2.33029e-06	1.71023e-05
708	0.000240892	0	0	2.63697e-05	2.28557e-06	1.70419e-05
709	0.000237722	0	0	2.62138e-05	2.28767e-06	1.70102e-05
710	0.000234589	0	0	2.60565e-05	2.33531e-06	1.70072e-05
711	0.000231492	0	0	2.58976e-05	2.42639e-06	1.70318e-05
712	0.000228434	0	0	2.57369e-05	2.55808e-06	1.70818e-05
713	0.000225422	0	0	2.55743e-05	2.72682e-06	1.71544e-05
714	0.000222463	0	0	2.54095e-05	2.92841e-06	1.72457e-05
715	0.000219568	0	0	2.5242e-05	3.15807e-06	1.73514e-05
716	0.000216747	0	0	2.50714e-05	3.41061e-06	1.74666e-05
717	0.000214016	0	0	2.48971e-05	3.68036e-06	1.75859e-05
718	0.000211382	0	3.03969e-07	2.46871e-05	3.93344e-06	1.76877e-05
719	0.000208852	0	1.33295e-06	2.43972e-05	4.12555e-06	1.77445e-05
720	0.00020645	0	2.36593e-06	2.41009e-05	4.31512e-06	1.77879e-05
721	0.00020419	0	3.39657e-06	2.3798e-05	4.49605e-06	1.78123e-05
722	0.000202084	0	4.41818e-06	2.34882e-05	4.66221e-06	1.78125e-05
723	0.000200145	0	5.42378e-06	2.31711e-05	4.80754e-06	1.77831e-05
724	0.000198386	0	6.40622e-06	2.28464e-05	4.92607e-06	1.77191e-05
725	0.000196817	0	7.35829e-06	2.25139e-05	5.01199e-06	1.76158e-05
726	0.000195451	0	8.27285e-06	2.21732e-05	5.05969e-06	1.74683e-05
727	0.000194298	0	9.14298e-06	2.1824e-05	5.06381e-06	1.72723e-05
728	0.000193367	0	9.96213e-06	2.14662e-05	5.01926e-06	1.70234e-05
729	0.000192669	0	1.07242e-05	2.10997e-05	4.92132e-06	1.67176e-05
730	0.000192212	0	1.14239e-05	2.07243e-05	4.76559e-06	1.6351e-05
731	0.000192005	0	1.20565e-05	2.03403e-05	4.54813e-06	1.59197e-05
732	0.000192057	0	1.26181e-05	1.99476e-05	4.26542e-06	1.54202e-05
733	0.000192374	0	1.31061e-05	1.95466e-05	3.91443e-06	1.48494e-05
734	0.000192964	0	1.35186e-05	1.91378e-05	3.49269e-06	1.42041e-05
735	0.000193833	0	1.38547e-05	1.87216e-05	2.99826e-06	1.34818e-05
736	0.000194985	0	1.41149e-05	1.82988e-05	2.42985e-06	1.26803e-05
737	0.000196424	0	1.43003e-05	1.78701e-05	1.78678e-06	1.1798e-05
738	0.000198151	0	1.44131e-05	1.74365e-05	1.06907e-06	1.08339e-05
739	0.000200166	0	1.44564e-05	1.69991e-05	2.77434e-07	9.78784e-06
740	0.000202328	0	1.43054e-05	1.65692e-05	0	8.50957e-06
741	0.000204688	0	1.40167e-05	1.6144e-05	0	7.06221e-06
742	0.000207303	0	1.36569e-05	1.57199e-05	0	5.52059e-06
743	0.000210161	0	1.3232e-05	1.52982e-05	0	3.88953e-06
744	0.000213249	0	1.27484e-05	1.48804e-05	0	2.17525e-06
745	0.000216549	0	1.22127e-05	1.44677e-05	0	3.85382e-07
746	0.000218568	0	1.12965e-05	1.41035e-05	0	0
747	0.000220312	0	1.0241e-05	1.37598e-05	0	0
748	0.000222148	0	9.1433e-06	1.34264e-05	0	0
749	0.00022406	0	8.01252e-06	1.3104e-05	0	0
750	0.000226025	0	6.85792e-06	1.27934e-05	0	0
751	0.000228024	0	5.68854e-06	1.24951e-05	0	0
752	0.000230033	0	4.51322e-06	1.22095e-05	0	0
753	0.000232027	0	3.34051e-06	1.19369e-05	0	0
754	0.000233983	0	2.17858e-06	1.16776e-05	0	0
755	0.000235875	0	1.03524e-06	1.14316e-05	0	0
756	0.000237669	0	0	1.11906e-05	0	0
757	0.000239235	0	0	1.08596e-05	0	0
758	0.000240669	0	0	1.05461e-05	0	0
759	0.000241944	0	0	1.02512e-05	0	0
760	0.000243043	0	0	9.97506e-06	0	0
761	0.000243947	0	0	9.71835e-06	0	0
762	0.00024464	0	0	9.48171e-06	0	0
763	0.000245105	0	0	9.26581e-06	0	0
764	0.000245332	0	0	9.07139e-06	0	0
765	0.000245311	0	0	8.89922e-06	0	0
766	0.000245033	0	0	8.75013e-06	0	0
767	0.000244496	0	0	8.62495e-06	0	0
768	0.000243696	0	0	8.52455e-06	0	0
769	0.000242636	0	0	8.44979e-06	0	0
770	0.000241319	0	0	8.40147e-06	0	0
771	0.00023975	0	0	8.38034e-06	0	0
772	0.000237939	0	0	8.38704e-06	0	0
773	0.000235897	0	0	8.42205e-06	0	0
774	0.000233635	0	0	8.48568e-06	0	0
775	0.00023117	0	0	8.57804e-06	0	0
776	0.000228517	0	0	8.699e-06	0	0
777	0.000225694	0	0	8.84815e-06	0	0
778	0.000222721	0	0	9.02482e-06	0	0
779	0.000219618	0	0	9.22804e-06	0	0
780	0.000216407	0	0	9.45653e-06	0	0
781	0.000213108	0	0	9.70875e-06	0	0
782	0.000209743	0	0	9.98287e-06	0	0
783	0.000206335	0	0	1.02768e-05	0	0
784	0.000202905	0	0	1.05882e-05	0	0
785	0.000199476	0	0	1.09146e-05	0	0
786	0.000196068	0	0	1.12532e-05	0	0
787	0.000192702	0	0	1.16014e-05	0	0
788	0.000187432	0	0	1.19659e-05	0	1.9174e-06
789	0.000181908	0	0	1.23358e-05	0	4.15975e-06
790	0.000176526	0	0	1.27063e-05	0	6.36036e-06
791	0.000171312	0	0	1.30745e-05	0	8.50819e-06
792	0.000166293	0	0	1.34375e-05	0	1.0593e-05
793	0.000161492	0	0	1.37927e-05	0	1.26054e-05
794	0.00015693	0	0	1.41375e-05	0	1.45368e-05
795	0.000152627	0	0	1.44695e-05	0	1.63794e-05
796	0.000148599	0	0	1.47866e-05	0	1.81264e-05
797	0.000144859	0	3.61684e-08	1.5083e-05	0	1.97686e-05
798	0.00014139	0	9.88652e-07	1.52657e-05	0	2.12334e-05
799	0.000138231	0	2.00448e-06	1.54216e-05	0	2.25811e-05
800	0.000135392	0	3.07836e-06	1.55499e-05	0	2.38081e-05
801	0.000132887	0	4.20488e-06	1.56494e-05	0	2.49085e-05
802	0.000130714	0	5.37514e-06	1.57206e-05	0	2.58825e-05
803	0.000128876	0	6.58056e-06	1.57638e-05	0	2.67284e-05
804	0.000127376	0	7.81166e-06	1.57793e-05	0	2.7445e-05
805	0.000126214	0	9.05821e-06	1.57677e-05	0	2.80315e-05
806	0.000125379	2.05931e-07	1.02389e-05	1.57249e-05	0	2.84774e-05
807	0.00012485	9.43079e-07	1.12311e-05	1.5644e-05	0	2.87665e-05
808	0.000124654	1.64733e-06	1.22166e-05	1.554e-05	0	2.89284e-05
809	0.000124789	2.31385e-06	1.31857e-05	1.54143e-05	0	2.89651e-05
810	0.000125246	2.93794e-06	1.41287e-05	1.52685e-05	0	2.88789e-05
811	0.000126019	3.51519e-06	1.50365e-05	1.51043e-05	0	2.8673e-05
812	0.000127098	4.04149e-06	1.59004e-05	1.49232e-05	0	2.83511e-05
813	0.000128472	4.51319e-06	1.67122e-05	1.4727e-05	0	2.7918e-05
814	0.000130129	4.92716e-06	1.74648e-05	1.45174e-05	0	2.7379e-05
815	0.000132054	5.28081e-06	1.81517e-05	1.42961e-05	0	2.67405e-05
816	0.00013423	5.5722e-06	1.87675e-05	1.40648e-05	0	2.60096e-05
817	0.000136638	5.80005e-06	1.93078e-05	1.38252e-05	0	2.51945e-05
818	0.000139257	5.96372e-06	1.97692e-05	1.35788e-05	0	2.43043e-05
819	0.000142066	6.06325e-06	2.01492e-05	1.33275e-05	0	2.33489e-05
820	0.00014504	6.09932e-06	2.04463e-05	1.30727e-05	0	2.23392e-05
821	0.000148152	6.0732e-06	2.066e-05	1.2816e-05	0	2.12868e-05
822	0.000151375	5.98669e-06	2.07905e-05	1.25589e-05	0	2.02039e-05
823	0.000154682	5.84209e-06	2.08387e-05	1.23031e-05	0	1.91035e-05
824	0.000158043	5.64209e-06	2.08062e-05	1.205e-05	0	1.79987e-05
825	0.000161429	5.3897e-06	2.06951e-05	1.1801e-05	0	1.69032e-05
826	0.000164811	5.08817e-06	2.05079e-05	1.15577e-05	0	1.58305e-05
827	0.00016816	4.74094e-06	2.02473e-05	1.13213e-05	0	1.4794e-05
828	0.000171449	4.3515e-06	1.99165e-05	1.10933e-05	0	1.38068e-05
829	0.000174651	3.92339e-06	1.95188e-05	1.0875e-05	0	1.28816e-05
830	0.000177744	3.46012e-06	1.90575e-05	1.06677e-05	0	1.20301e-05
831	0.000180704	2.96512e-06	1.85361e-05	1.04724e-05	0	1.12635e-05
832	0.000183515	2.44171e-06	1.79584e-05	1.02903e-05	0	1.05917e-05
833	0.000186159	1.89311e-06	1.73279e-05	1.01224e-05	0	1.00234e-05
834	0.000188624	1.3224e-06	1.66487e-05	9.96961e-06	0	9.56625e-06
835	0.000190901	7.32534e-07	1.59247e-05	9.83271e-06	0	9.22664e-06
836	0.000192984	1.26388e-07	1.51602e-05	9.7124e-06	0	9.00954e-06
837	0.000194842	0	1.41909e-05	9.59723e-06	0	8.89356e-06
838	0.000196497	0	1.31434e-05	9.49635e-06	0	8.89943e-06
839	0.000197959	0	1.20672e-05	9.41328e-06	0	9.03521e-06
840	0.000199233	0	1.09684e-05	9.34835e-06	0	9.30152e-06
841	0.000200328	0	9.85403e-06	9.30181e-06	0	9.69815e-06
842	0.000201253	0	8.73106e-06	9.27382e-06	0	1.02242e-05
843	0.000202018	0	7.60713e-06	9.26485e-06	0	1.08808e-05
844	0.000202638	0	6.49029e-06	9.2746e-06	0	1.16639e-05
845	0.000203127	0	5.38862e-06	9.303e-06	0	1.25713e-05
846	0.000203497	0	4.31046e-06	9.34998e-06	0	1.3601e-05
847	0.000203762	0	3.26425e-06	9.41541e-06	0	1.47511e-05
848	0.000203934	0	2.25849e-06	9.49914e-06	0	1.602e-05
849	0.000204026	0	1.30161e-06	9.60093e-06	0	1.74063e-05
850	0.000204048	0	4.0189e-07	9.72052e-06	0	1.89088e-05
851	0.000203995	0	0	9.81268e-06	0	2.04936e-05
852	0.00020388	0	0	9.8877e-06	0	2.2168e-05
853	0.000203728	0	0	9.98738e-06	0	2.3963e-05
854	0.000203544	0	0	1.01117e-05	0	2.58786e-05
855	0.000203338	0	0	1.02604e-05	0	2.79152e-05
856	0.000203117	0	0	1.04328e-05	0	3.00727e-05
857	0.000202888	0	0	1.06283e-05	0	3.23509e-05
858	0.000202659	0	0	1.08455e-05	0	3.47489e-05
859	0.000202439	0	0	1.1083e-05	0	3.72654e-05
860	0.000202235	0	0	1.13389e-05	0	3.98985e-05
861	0.000202059	0	0	1.1611e-05	0	4.26452e-05
862	0.000201922	0	0	1.18967e-05	0	4.55019e-05
863	0.000201835	0	0	1.21929e-05	0	4.84639e-05
864	0.000201814	0	0	1.24964e-05	0	5.15254e-05
865	0.000201874	0	0	1.28036e-05	0	5.46797e-05
866	0.000202032	0	0	1.31107e-05	0	5.79192e-05
867	0.000202307	0	0	1.34136e-05	0	6.12352e-05
868	0.000202719	0	0	1.37081e-05	0	6.46183e-05
869	0.000203267	0	6.22443e-07	1.39254e-05	0	6.80105e-05
870	0.000203985	0	1.52868e-06	1.40962e-05	0	7.14271e-05
871	0.000204906	0	2.4857e-06	1.42406e-05	0	7.48746e-05
872	0.000206052	0	3.48447e-06	1.43553e-05	0	7.83423e-05
873	0.000207447	0	4.51596e-06	1.44374e-05	0	8.18195e-05
874	0.000209115	0	5.57135e-06	1.44842e-05	0	8.52956e-05
875	0.000211077	0	6.64218e-06	1.44935e-05	0	8.87607e-05
876	0.000213356	0	7.72049e-06	1.44634e-05	0	9.22054e-05
877	0.000215969	0	8.79892e-06	1.43924e-05	0	9.56214e-05
878	0.000218933	0	9.87077e-06	1.42797e-05	0	9.90015e-05
879	0.000222261	0	1.093e-05	1.41248e-05	0	0.00010234
880	0.000225965	0	1.19713e-05	1.39281e-05	0	0.000105633
881	0.000230049	0	1.299e-05	1.36905e-05	0	0.000108878
882	0.000234515	0	1.39816e-05	1.34135e-05	0	0.000112076
883	0.00023936	0	1.49423e-05	1.30994e-05	0	0.000115228
884	0.000244576	0	1.58683e-05	1.27512e-05	0	0.000118339
885	0.000250157	0	1.67551e-05	1.23721e-05	0	0.000121416
886	0.000256077	0	1.75991e-05	1.19668e-05	0	0.000124468
887	0.000262312	0	1.83961e-05	1.15404e-05	0	0.000127507
888	0.000268833	0	1.91417e-05	1.10983e-05	0	0.000130546
889	0.000275608	0	1.98309e-05	1.06464e-05	0	0.000133602
890	0.000282598	0	2.04587e-05	1.0191e-05	0	0.000136691
891	0.000289765	0	2.10199e-05	9.7383e-06	0	0.000139832
892	0.000297067	0	2.151e-05	9.29485e-06	0	0.000143044
893	0.000304459	0	2.19253e-05	8.86692e-06	0	0.000146347
894	0.000311897	0	2.22638e-05	8.4605e-06	0	0.000149761
895	0.000319338	0	2.25256e-05	8.08108e-06	0	0.000153306
896	0.000326739	0	2.27135e-05	7.73347e-06	0	0.000157
897	0.000334061	0	2.28341e-05	7.42163e-06	0	0.00016086
898	0.000341269	0	2.28977e-05	7.14852e-06	0	0.000164902
899	0.00034833	0	2.29187e-05	6.91601e-06	0	0.000169139
900	0.000355218	0	2.29155e-05	6.72481e-06	0	0.000173583
901	0.000361914	0	2.29095e-05	6.57449e-06	0	0.00017824
902	0.000368404	0	2.29244e-05	6.46358e-06	0	0.000183118
903	0.000374681	0	2.2984e-05	6.38972e-06	0	0.000188218
904	0.000380747	0	2.31103e-05	6.34987e-06	0	0.000193542
905	0.000386609	0	2.33208e-05	6.34064e-06	0	0.000199086
906	0.000392283	0	2.36259e-05	6.35858e-06	0	0.000204848
907	0.00039779	0	2.40263e-05	6.40052e-06	0	0.00021082
908	0.000403159	0	2.45105e-05	6.46388e-06	0	0.000216995
909	0.000408425	0	2.50536e-05	6.54693e-06	0	0.000223366
910	0.000413626	0	2.56171e-05	6.64887e-06	0	0.000229921
911	0.000418806	0	2.61492e-05	6.76995e-06	0	0.000236652
912	0.000424006	7.17063e-08	2.65628e-05	6.90954e-06	0	0.000243545
913	0.000429231	1.02745e-06	2.65101e-05	7.04958e-06	0	0.000250548
914	0.000434589	1.76592e-06	2.62955e-05	7.21899e-06	0	0.000257708
915	0.000440131	2.21658e-06	2.58733e-05	7.42142e-06	0	0.000265016
916	0.000445907	2.31642e-06	2.52033e-05	7.65975e-06	0	0.000272467
917	0.000451961	2.01462e-06	2.42545e-05	7.93554e-06	0	0.000280052
918	0.000458335	1.27631e-06	2.30083e-05	8.24859e-06	0	0.000287763
919	0.000465061	8.52706e-08	2.146e-05	8.59672e-06	0	0.000295591
920	0.000472081	0	1.90879e-05	8.93772e-06	0	0.000303446
921	0.00047947	0	1.62743e-05	9.29086e-06	0	0.000311371
922	0.000487247	0	1.31002e-05	9.65146e-06	0	0.000319365
923	0.000495414	0	9.63202e-06	1.00121e-05	0	0.00032742
924	0.000503969	0	5.94568e-06	1.03653e-05	0	0.000335534
925	0.0005129	0	2.12109e-06	1.07039e-05	0	0.000343707
926	0.000522128	0	0	1.08393e-05	0	0.000351805
927	0.000531617	0	0	1.07308e-05	0	0.000359811
928	0.00054141	0	0	1.06024e-05	0	0.000367902
929	0.000551467	0	0	1.04586e-05	0	0.000376094
930	0.000561745	0	0	1.03047e-05	0	0.000384408
931	0.000572197	0	0	1.01459e-05	0	0.000392866
932	0.000582773	0	0	9.98822e-06	0	0.000401492
933	0.000593419	0	0	9.83746e-06	0	0.000410311
934	0.000604082	0	0	9.69954e-06	0	0.000419348
935	0.000614707	0	0	9.58015e-06	0	0.00042863
936	0.000625241	0	0	9.48464e-06	0	0.000438182
937	0.000635634	0	0	9.41786e-06	0	0.000448028
938	0.000645839	0	0	9.384e-06	0	0.000458194
939	0.000655814	0	0	9.3865e-06	0	0.000468699
940	0.000665521	0	0	9.42793e-06	0	0.000479564
941	0.00067493	0	0	9.50992e-06	0	0.000490807
942	0.000684017	0	0	9.6331e-06	0	0.00050244
943	0.000692765	0	0	9.7971e-06	0	0.000514477
944	0.000701164	0	0	1.00005e-05	0	0.000526925
945	0.000709212	0	0	1.0241e-05	0	0.000539792
946	0.000716911	0	0	1.05152e-05	0	0.000553082
947	0.000724273	0	0	1.0819e-05	0	0.000566795
948	0.000731313	0	0	1.11474e-05	0	0.000580933
949	0.000738051	0	0	1.14949e-05	0	0.000595495
950	0.000744512	0	0	1.18553e-05	0	0.000610479
951	0.000750722	0	0	1.22221e-05	0	0.000625885
952	0.000756712	0	0	1.25886e-05	0	0.00064171
953	0.000762513	0	0	1.29479e-05	0	0.000657953
954	0.000768158	0	0	1.32933e-05	0	0.000674613
955	0.000773682	0	0	1.3618e-05	0	0.000691688
956	0.000779123	0	0	1.39159e-05	0	0.000709175
957	0.000784521	0	0	1.4181e-05	0	0.000727065
958	0.000789918	0	0	1.44083e-05	0	0.000745349
959	0.000795364	0	0	1.45931e-05	0	0.000764009
960	0.000800909	0	0	1.47317e-05	0	0.000783023
961	0.000806609	0	0	1.48214e-05	0	0.000802363
962	0.000812524	0	0	1.48603e-05	0	0.000821993
963	0.000818712	0	0	1.48475e-05	0	0.000841878
964	0.000825229	0	0	1.47834e-05	0	0.000861978
965	0.000832121	0	0	1.46691e-05	0	0.00088226
966	0.000839427	0	0	1.45073e-05	0	0.000902695
967	0.000847167	0	0	1.43013e-05	0	0.00092327
968	0.000855343	0	0	1.40557e-05	0	0.000943982
969	0.00086394	0	0	1.37758e-05	0	0.000964849
970	0.000872913	0	0	1.3468e-05	0	0.000985906
971	0.000882196	0	0	1.31401e-05	0	0.0010072
972	0.000891709	0	0	1.27995e-05	0	0.0010288
973	0.000901359	0	0	1.24544e-05	0	0.00105077
974	0.000911044	0	0	1.21129e-05	0	0.0010732
975	0.000920663	0	0	1.1783e-05	0	0.00109616
976	0.000930114	0	0	1.14723e-05	0	0.00111973
977	0.000939304	0	0	1.11876e-05	0	0.00114397
978	0.000948146	0	0	1.09348e-05	0	0.00116895
979	0.000956569	0	0	1.07186e-05	0	0.00119471
980	0.000964512	0	0	1.05419e-05	0	0.00122129
981	0.000971925	0	0	1.0406e-05	0	0.0012487
982	0.000978773	0	0	1.03102e-05	0	0.00127696
983	0.000985029	0	0	1.02514e-05	0	0.00130608
984	0.000990676	0	0	1.02244e-05	0	0.00133605
985	0.000995706	0	0	1.02217e-05	0	0.00136687
986	0.00100012	0	0	1.02336e-05	0	0.00139852
987	0.00100391	0	0	1.02482e-05	0	0.00143098
988	0.00100711	0	0	1.02518e-05	0	0.00146424
989	0.00100971	0	0	1.02292e-05	0	0.00149827
990	0.00101175	0	0	1.0164e-05	0	0.00153305
991	0.00101325	0	0	1.00393e-05	0	0.00156854
992	0.00101422	0	0	9.83814e-06	0	0.00160472
993	0.00101471	0	0	9.54397e-06	0	0.00164155
994	0.00101475	0	0	9.14133e-06	0	0.001679
995	0.00101437	0	0	8.61638e-06	0	0.00171703
996	0.00101363	0	0	7.95741e-06	0	0.00175558
997	0.00101256	0	0	7.15523e-06	0	0.0017946
998	0.00101123	0	0	6.20359e-06	0	0.00183403
999	0.00100968	0	0	5.09931e-06	0	0.00187381
1000	0.001008	0	0	3.8425e-06	0	0.00191385
1001	0.00100624	0	0	2.43647e-06	0	0.00195406
1002	0.00100449	0	0	8.87707e-07	0	0.00199434
1003	0.00100279	0	0	0	0	0.00203461
1004	0.00100121	0	0	0	0	0.00207474
1005	0.000999859	0	0	0	0	0.00211464
1006	0.000998784	0	0	0	0	0.0021542
1007	0.000998031	0	0	0	0	0.00219335
1008	0.000997619	0	0	0	0	0.00223201
1009	0.000997535	0	0	0	0	0.00227013
1010	0.000997734	0	0	0	0	0.00230771
1011	0.000998133	0	0	0	0	0.00234476
1012	0.000998604	0	0	0	0	0.00238134
1013	0.000998983	0	0	0	0	0.00241754
1014	0.000999075	0	0	0	0	0.00245349
1015	0.000998661	0	0	0	0	0.00248933
1016	0.000997506	0	0	0	0	0.00252522
1017	0.000995371	0	0	0	0	0.00256132
1018	0.000992027	0	0	0	0	0.0025978
1019	0.000987263	0	0	0	0	0.00263479
1020	0.0009809	0	0	0	0	0.0026724
1021	0.000972796	0	0	0	0	0.00271072
1022	0.000962427	6.26029e-06	0	0	0	0.00274931
1023	0.000950122	1.32644e-05	0	0	0	0.00278858
1024	0.000936008	1.91059e-05	0	0	0	0.00282866
1025	0.000920143	2.3486e-05	0	0	0	0.00286949
1026	0.00090262	2.61587e-05	0	0	0	0.00291099
1027	0.00088355	2.69584e-05	0	0	0	0.00295305
1028	0.000863061	2.5821e-05	0	0	0	0.00299554
1029	0.000841284	2.27931e-05	0	0	0	0.00303833
1030	0.00081835	1.80295e-05	0	0	0	0.00308125
1031	0.000794383	1.17785e-05	0	0	0	0.00312415
1032	0.000769505	4.3562e-06	0	0	0	0.00316689
1033	0.00074356	0	0	0	0	0.00320903
1034	0.00071659	0	0	0	0	0.00325035
1035	0.000689019	0	0	0	0	0.00329109
1036	0.000660962	0	0	0	0	0.00333119
1037	0.000632522	0	0	0	0	0.00337056
1038	0.000603792	0	0	0	0	0.00340917
1039	0.000574852	0	0	0	0	0.00344696
1040	0.000545763	0	0	0	0	0.00348393
1041	0.000516574	0	0	0	0	0.00352005
1042	0.000487314	0	0	0	0	0.00355535
1043	0.000457999	0	0	0	0	0.00358984
1044	0.000428626	0	0	0	0	0.00362357
1045	0.000399179	0	0	0	0	0.00365658
1046	0.000369626	0	0	0	0	0.00368894
1047	0.000339922	0	0	0	0	0.00372073
1048	0.000310006	0	0	0	0	0.00375201
1049	0.000279806	0	0	0	0	0.0037829
1050	0.000249238	0	0	0	0	0.00381348
1051	0.000218213	0	0	0	0	0.00384387
1052	0.000186638	0	0	0	0	0.00387417
1053	0.000154417	0	0	0	0	0.00390446
1054	0.000121473	0	0	0	0	0.00393484
1055	8.77673e-05	0	0	0	0	0.00396536
1056	5.32861e-05	0	0	0	0	0.00399604
1057	1.80592e-05	0	0	0	0	0.00402685
1058	0	0	0	0	0	0.00404961
1059	0	0	0	0	0	0.00406386
1060	0	0	0	0	0	0.00407774
1061	0	0	0	0	0	0.00409115
1062	0	0	0	0	0	0.004104
1063	0	0	0	0	0	0.00411618
1064	0	0	0	0	0	0.00412764
1065	0	0	0	0	0	0.00413829
1066	0	0	0	0	0	0.00414812
1067	0	0	0	0	0	0.00415712
1068	0	0	0	0	0	0.0041653
1069	0	0	0	0	0	0.00417271
1070	0	0	0	0	0	0.00417937
1071	0	0	0	0	0	0.00418534
1072	0	0	0	0	0	0.00419063
1073	0	0	8.36749e-06	0	0	0.00419445
1074	0	0	1.43796e-05	0	0	0.00419777
1075	0	0	1.75501e-05	0	0	0.00420058
1076	0	0	1.77289e-05	0	0	0.0042028
1077	0	0	1.50319e-05	0	0	0.00420429
1078	0	0	9.8197e-06	0	0	0.00420488
1079	0	0	2.64029e-06	0	0	0.00420439
1080	0	0	0	0	0	0.00420205
1081	0	0	0	0	0	0.00419793
1082	0	0	0	0	0	0.00419215
1083	0	0	0	0	0	0.00418463
1084	0	0	0	0	0	0.0041753
1085	0	0	0	0	0	0.00416408
1086	0	0	0	0	0	0.00415096
1087	0	0	0	0	0	0.0041359
1088	0	0	0	0	0	0.00411889
1089	0	0	0	0	0	0.00409993
1090	0	0	0	0	0	0.00407904
1091	0	0	0	0	0	0.00405627
1092	0	0	0	0	0	0.00403168
1093	0	0	0	0	0	0.00400536
1094	0	0	0	0	0	0.00397743
1095	0	0	0	0	0	0.00394804
1096	0	0	0	0	0	0.00391736
1097	0	0	0	0	0	0.00388562
1098	0	0	0	0	0	0.00385301
1099	0	0	0	0	0	0.00381976
1100	0	0	0	0	0	0.00378605
1101	0	0	0	0	0	0.00375208
1102	0	1.21253e-05	0	0	0	0.00371667
1103	0	2.87771e-05	0	0	0	0.00368077
1104	0	4.83011e-05	0	0	0	0.00364464
1105	0	7.03898e-05	0	0	0	0.00360835
1106	0	9.45316e-05	0	0	0	0.00357198
1107	0	0.000120049	0	0	0	0.0035356
1108	0	0.00014615	0	0	0	0.00349928
1109	0	0.000171996	0	0	0	0.00346309
1110	0	0.000196426	1.01592e-06	0	0	0.00342704
1111	0	0.000218028	5.05459e-06	0	0	0.00339112
1112	0	0.000237064	9.40964e-06	0	0	0.00335556
1113	0	0.00025306	1.40728e-05	0	0	0.00332048
1114	0	0.000265721	1.89978e-05	0	0	0.00328599
1115	0	0.000274931	2.41007e-05	0	0	0.00325222
1116	0	0.000275289	2.78148e-05	0	1.44414e-05	0.00321446
1117	0	0.000271046	3.10802e-05	0	3.25455e-05	0.00317645
1118	0	0.000263897	3.41171e-05	0	5.05903e-05	0.00313954
1119	1.57382e-05	0.000253772	3.6608e-05	0	6.64186e-05	0.00309757
1120	4.58093e-05	0.000241203	3.84544e-05	0	7.99983e-05	0.00305127
1121	7.45362e-05	0.000227198	3.97516e-05	0	9.30798e-05	0.00300708
1122	0.000101722	0.000212238	4.04393e-05	0	0.000105538	0.00296515
1123	0.000127212	0.000196764	4.04864e-05	0	0.000117281	0.00292562
1124	0.00015089	0.000181168	3.98876e-05	0	0.000128247	0.00288854
1125	0.000172681	0.000165785	3.86574e-05	0	0.000138405	0.00285396
1126	0.00019254	0.000150892	3.68224e-05	0	0.000147749	0.00282184
1127	0.000210451	0.000136715	3.44141e-05	0	0.00015629	0.00279216
1128	0.00022642	0.000123434	3.14649e-05	0	0.000164051	0.00276485
1129	0.000240467	0.000111198	2.80061e-05	0	0.000171059	0.00273984
1130	0.000252631	0.000100131	2.40701e-05	0	0.000177341	0.00271704
1131	0.000262961	9.03467e-05	1.96944e-05	0	0.000182917	0.00269635
1132	0.000271525	8.19484e-05	1.49264e-05	0	0.000187803	0.00267766
1133	0.000278405	7.50325e-05	9.8293e-06	0	0.000192012	0.00266084
1134	0.000283707	6.96829e-05	4.48438e-06	0	0.000195551	0.00264574
1135	0.00028755	6.56459e-05	0	0	0.000198396	0.00263214
1136	0.000290057	6.18524e-05	0	0	0.000200432	0.00261971
1137	0.000291437	5.974e-05	0	0	0.000201857	0.0026084
1138	0.000291878	5.9309e-05	0	0	0.000202708	0.00259801
1139	0.000291611	6.04462e-05	0	0	0.000203054	0.00258827
1140	0.000290851	6.30166e-05	0	0	0.000202963	0.00257891
1141	0.000289809	6.68387e-05	0	0	0.000202507	0.00256972
1142	0.000288682	7.1697e-05	0	0	0.000201762	0.00256045
1143	0.000287647	7.73561e-05	0	0	0.000200801	0.00255093
1144	0.000286848	8.35764e-05	0	0	0.000199689	0.00254097
1145	0.000286396	9.01275e-05	0	0	0.00019848	0.00253047
1146	0.000286369	9.67992e-05	0	0	0.000197214	0.00251934
1147	0.000286806	0.000103409	0	0	0.00019592	0.00250752
1148	0.000287715	0.000109807	0	0	0.000194611	0.00249502
1149	0.000289075	0.000115876	0	0	0.000193289	0.00248185
1150	0.00029084	0.000121531	0	0	0.000191945	0.00246807
1151	0.000292949	0.000126715	0	0	0.000190564	0.00245373
1152	0.000295324	0.000131396	0	0	0.000189123	0.00243891
1153	0.000297885	0.000135564	0	0	0.000187597	0.00242372
1154	0.000300547	0.00013922	0	0	0.000185957	0.00240823
1155	0.000303226	0.000142375	0	0	0.000184177	0.00239254
1156	0.000305845	0.000145043	0	0	0.000182232	0.00237673
1157	0.000308335	0.000147235	0	0	0.000180098	0.00236088
1158	0.000310637	0.000148959	0	0	0.000177761	0.00234506
1159	0.000312707	0.00015022	0	0	0.000175208	0.00232931
1160	0.000314511	0.000151018	0	0	0.000172434	0.00231368
1161	0.000316032	0.000151358	0	0	0.000169443	0.00229818
1162	0.000317265	0.000151245	0	0	0.000166242	0.00228283
1163	0.000318221	0.000150696	0	0	0.000162848	0.0022676
1164	0.00031892	0.000149732	0	0	0.000159283	0.00225247
1165	0.000319396	0.000148381	0	0	0.000155575	0.00223741
1166	0.000319692	0.000146663	0	0	0.000151759	0.00222235
1167	0.000319859	0.00014459	0	0	0.000147876	0.00220724
1168	0.000319957	0.000142147	0	0	0.000143972	0.00219202
1169	0.000320047	0.000139287	0	0	0.000140099	0.00217662
1170	0.000320192	0.000135926	0	0	0.000136309	0.00216099
1171	0.000320455	0.00013195	0	0	0.000132658	0.00214506
1172	0.000320895	0.000127218	0	0	0.000129197	0.00212881
1173	0.00032156	0.000121588	0	0	0.000125972	0.0021122
1174	0.00032249	0.00011494	0	0	0.000123017	0.00209523
1175	0.000323708	0.000107199	0	0	0.000120352	0.00207791
1176	0.000325222	9.83662e-05	0	0	0.000117979	0.00206024
1177	0.000327024	8.85383e-05	0	0	0.000115879	0.00204226
1178	0.000329088	7.7917e-05	0	0	0.000114015	0.00202403
1179	0.000331373	6.68107e-05	0	0	0.000112327	0.0020056
1180	0.000333829	5.56313e-05	0	0	0.000110746	0.00198701
1181	0.00033639	4.48644e-05	0	0	0.000109183	0.00196835
1182	0.000338991	3.50179e-05	0	0	0.000107554	0.00194965
1183	0.000341569	2.65921e-05	0	0	0.000105774	0.00193099
1184	0.000344006	1.7751e-05	7.29622e-06	0	0.000103502	0.00191209
1185	0.000346294	1.04023e-05	1.69445e-05	0	0.000100867	0.00189321
1186	0.000348401	4.97358e-06	2.83227e-05	0	9.78585e-05	0.00187439
1187	0.000350306	1.58715e-06	4.13005e-05	0	9.44766e-05	0.00185565
1188	0.000352	2.55447e-07	5.55758e-05	0	9.07532e-05	0.00183704
1189	0.000353491	8.88017e-07	7.06607e-05	0	8.67537e-05	0.00181855
1190	0.000354797	3.30501e-06	8.58969e-05	0	8.25729e-05	0.00180023
1191	0.000355944	7.25498e-06	0.000100506	0	7.83267e-05	0.00178211
1192	0.00035696	1.24351e-05	0.000113669	0	7.41418e-05	0.0017642
1193	0.000357872	1.8512e-05	0.000124629	0	7.01427e-05	0.00174654
1194	0.000358699	2.51433e-05	0.000132797	0	6.64396e-05	0.00172916
1195	0.000359449	3.19985e-05	0.000137832	0	6.31173e-05	0.00171206
1196	0.000360114	3.87786e-05	0.000139696	0	6.02282e-05	0.00169526
1197	0.000360675	4.52345e-05	0.000138653	0	5.77892e-05	0.00167875
1198	0.000361098	5.11807e-05	0.000135227	0	5.5785e-05	0.00166252
1199	0.000361341	5.65041e-05	0.00013011	0	5.41739e-05	0.00164656
1200	0.000361358	6.11643e-05	0.000124065	0	5.28979e-05	0.00163084
1201	0.000361103	6.51857e-05	0.000117818	0	5.18933e-05	0.00161533
1202	0.000360538	6.86426e-05	0.000111972	0	5.11015e-05	0.00160003
1203	0.000359638	7.16368e-05	0.000106953	0	5.04762e-05	0.0015849
1204	0.000358392	7.42742e-05	0.000102994	0	4.99896e-05	0.00156993
1205	0.000356806	7.6642e-05	0.000100145	0	4.96332e-05	0.00155509
1206	0.000354905	7.87925e-05	9.8316e-05	0	4.94175e-05	0.00154038
1207	0.000352727	8.07338e-05	9.73178e-05	0	4.93674e-05	0.00152576
1208	0.000350324	8.24303e-05	9.69161e-05	0	4.95176e-05	0.00151121
1209	0.000347758	8.38121e-05	9.68709e-05	0	4.9906e-05	0.00149671
1210	0.000345091	8.47897e-05	9.69654e-05	0	5.05679e-05	0.00148223
1211	0.000342388	8.52725e-05	9.70234e-05	0	5.15311e-05	0.00146775
1212	0.000339709	8.51859e-05	9.69149e-05	0	5.28122e-05	0.00145326
1213	0.000337104	8.44852e-05	9.65539e-05	0	5.44143e-05	0.00143874
1214	0.000334618	8.31643e-05	9.58924e-05	0	5.63264e-05	0.00142419
1215	0.000332285	8.12576e-05	9.49113e-05	0	5.8525e-05	0.00140961
1216	0.00033013	7.88361e-05	9.36125e-05	0	6.0976e-05	0.00139502
1217	0.00032817	7.59999e-05	9.20119e-05	0	6.36377e-05	0.00138041
1218	0.000326418	7.28672e-05	9.01335e-05	0	6.64643e-05	0.00136582
1219	0.000324878	6.95633e-05	8.80061e-05	0	6.94093e-05	0.00135126
1220	0.000323555	6.62091e-05	8.56599e-05	0	7.24281e-05	0.00133675
1221	0.000322449	6.29122e-05	8.31255e-05	0	7.5481e-05	0.0013223
1222	0.000321564	5.97632e-05	8.04299e-05	0	7.85345e-05	0.00130793
1223	0.000320893	5.68178e-05	7.76052e-05	0	8.15639e-05	0.00129365
1224	0.000320436	5.41011e-05	7.4678e-05	0	8.45547e-05	0.00127947
1225	0.00032019	5.16057e-05	7.16729e-05	0	8.75018e-05	0.00126538
1226	0.000320153	4.92935e-05	6.86125e-05	0	9.04098e-05	0.00125139
1227	0.000320322	4.7101e-05	6.55171e-05	0	9.32911e-05	0.00123749
1228	0.00032069	4.49482e-05	6.24053e-05	0	9.61639e-05	0.00122368
1229	0.000321246	4.27517e-05	5.92936e-05	0	9.90487e-05	0.00120995
1230	0.000321971	4.04381e-05	5.61966e-05	0	0.000101965	0.00119631
1231	0.000322838	3.79586e-05	5.31274e-05	0	0.000104928	0.00118276
1232	0.000323807	3.53002e-05	5.00975e-05	0	0.000107944	0.00116931
1233	0.000324828	3.24917e-05	4.71172e-05	0	0.000111012	0.00115599
1234	0.000325841	2.96033e-05	4.41955e-05	0	0.000114118	0.00114284
1235	0.000326779	2.67382e-05	4.13404e-05	0	0.000117242	0.00112989
1236	0.000327572	2.40175e-05	3.8559e-05	0	0.00012036	0.00111719
1237	0.000328154	2.15604e-05	3.58571e-05	0	0.000123445	0.00110478
1238	0.000328469	1.94634e-05	3.32398e-05	0	0.000126477	0.0010927
1239	0.000328472	1.77816e-05	3.07108e-05	0	0.000129444	0.00108097
1240	0.000328139	1.65159e-05	2.82729e-05	0	0.000132346	0.00106962
1241	0.000327465	1.56092e-05	2.59271e-05	0	0.000135195	0.00105864
1242	0.000326464	1.49519e-05	2.36734e-05	0	0.000138017	0.00104803
1243	0.000325167	1.43964e-05	2.15097e-05	0	0.000140844	0.00103776
1244	0.000323618	1.37796e-05	1.94325e-05	0	0.000143713	0.00102781
1245	0.000321867	1.29476e-05	1.74361e-05	0	0.000146661	0.00101813
1246	0.000319967	1.17811e-05	1.5513e-05	0	0.000149713	0.00100869
1247	0.000317967	1.02153e-05	1.36541e-05	0	0.000152886	0.000999465
1248	0.000315909	8.25203e-06	1.18492e-05	0	0.000156179	0.00099043
1249	0.000313827	5.96193e-06	1.00878e-05	0	0.000159576	0.000981569
1250	0.000311744	3.47597e-06	8.36033e-06	0	0.000163048	0.000972874
1251	0.00030968	9.67772e-07	6.66005e-06	0	0.000166552	0.000964343
1252	0.000307616	0	4.5567e-06	0	0.000169849	0.000955957
1253	0.000305581	0	2.29111e-06	0	0.000172996	0.000947729
1254	0.000303612	0	2.25163e-07	0	0.000176107	0.000939675
1255	0.000301699	0	0	0	0.000179016	0.000931713
1256	0.00029989	0	0	0	0.00018185	0.000923921
1257	0.000298211	0	0	0	0.000184612	0.000916303
1258	0.000296683	0	0	0	0.000187288	0.000908844
1259	0.000295325	0	0	0	0.000189862	0.000901529
1260	0.000294152	0	0	0	0.00019232	0.000894342
1261	0.000293173	0	0	0	0.000194651	0.000887271
1262	0.000292386	0	0	0	0.000196846	0.000880307
1263	0.000291782	0	0	0	0.000198898	0.00087345
1264	0.00029134	0	0	0	0.0002008	0.000866708
1265	0.000291028	0	0	0	0.000202553	0.000860093
1266	0.000290805	0	0	0	0.00020416	0.000853625
1267	0.000290624	0	0	0	0.000205626	0.00084733
1268	0.000290435	0	0	0	0.000206956	0.000841241
1269	0.000290186	0	0	0	0.000208159	0.000835389
1270	0.000289814	0	7.99772e-07	0	0.000209171	0.000829769
1271	0.000289283	0	1.66319e-06	0	0.000210067	0.000824453
1272	0.000288552	0	2.4686e-06	0	0.000210866	0.00081948
1273	0.000287585	0	3.21094e-06	0	0.000211577	0.000814879
1274	0.000286356	0	3.89147e-06	0	0.000212207	0.000810674
1275	0.000284843	0	4.51763e-06	0	0.000212762	0.000806884
1276	0.000283036	0	5.10256e-06	0	0.000213248	0.000803524
1277	0.000280932	0	5.6641e-06	0	0.000213672	0.000800597
1278	0.000278537	0	6.22337e-06	0	0.000214041	0.000798104
1279	0.000275865	0	6.80274e-06	0	0.000214363	0.000796035
1280	0.00027294	0	7.42331e-06	0	0.000214648	0.000794374
1281	0.000269792	0	8.10193e-06	0	0.000214909	0.000793095
1282	0.000266461	0	8.84822e-06	0	0.000215165	0.000792162
1283	0.000262996	0	9.66171e-06	0	0.000215434	0.000791534
1284	0.000259369	3.75349e-06	9.35698e-06	0	0.000215212	0.000791103
1285	0.000255681	9.4698e-06	8.46747e-06	0	0.00021478	0.000790836
1286	0.00025204	1.53021e-05	7.53132e-06	0	0.000214428	0.000790696
1287	0.00024852	2.10473e-05	6.56239e-06	0	0.000214215	0.000790621
1288	0.000245191	2.64857e-05	5.57292e-06	0	0.000214206	0.000790547
1289	0.00024212	3.13966e-05	4.57401e-06	0	0.000214461	0.00079042
1290	0.000239361	3.55773e-05	3.57606e-06	0	0.000215036	0.000790192
1291	0.000236956	3.88623e-05	2.58908e-06	0	0.000215973	0.000789831
1292	0.000234926	4.11423e-05	1.62296e-06	0	0.0002173	0.000789321
1293	0.000233272	4.23779e-05	6.87495e-07	0	0.000219026	0.000788664
1294	0.000231972	4.25436e-05	0	0	0.000221133	0.000787874
1295	0.000230981	4.16252e-05	0	0	0.000223574	0.000786972
1296	0.000230243	4.00374e-05	0	0	0.000226324	0.000786042
1297	0.000229685	3.80457e-05	0	0	0.000229319	0.000785152
1298	0.00022922	3.5967e-05	0	0	0.000232483	0.000784375
1299	0.000228757	3.4154e-05	0	0	0.000235731	0.00078379
1300	0.000228203	3.29781e-05	0	0	0.000238978	0.000783473
1301	0.000227469	3.28134e-05	0	0	0.000242139	0.000783492
1302	0.000226472	3.40217e-05	0	0	0.000245134	0.000783913
1303	0.000225136	3.6937e-05	0	0	0.000247892	0.000784785
1304	0.000223399	4.18503e-05	0	0	0.000250353	0.000786149
1305	0.000221214	4.89919e-05	0	0	0.000252472	0.00078803
1306	0.000218539	5.85535e-05	0	0	0.000254216	0.000790446
1307	0.000215369	7.0558e-05	0	0	0.000255584	0.000793383
1308	0.000211719	8.49147e-05	0	0	0.000256602	0.00079681
1309	0.000207626	0.000101412	0	0	0.00025732	0.00080068
1310	0.000203149	0.000119695	0	0	0.000257817	0.000804926
1311	0.000198374	0.000139271	0	0	0.000258202	0.000809464
1312	0.000193406	0.000159526	0	0	0.000258607	0.000814192
1313	0.000188366	0.000179759	0	0	0.00025918	0.000818999
1314	0.000183381	0.000199228	0	0	0.00026008	0.000823768
1315	0.000178577	0.000217206	0	0	0.000261461	0.000828381
1316	0.000174066	0.000233041	0	0	0.000263462	0.000832732
1317	0.000169943	0.000246213	0	0	0.000266197	0.000836727
1318	0.00016627	0.000256377	0	0	0.000269742	0.000840295
1319	0.000163065	0.000262758	2.03287e-06	0	0.000274057	0.000843303
1320	0.000160333	0.000265808	4.90964e-06	0	0.000279179	0.000845779
1321	0.000158046	0.000265951	8.15551e-06	0	0.000285078	0.000847743
1322	0.000156142	0.000263648	1.17222e-05	0	0.000291672	0.000849221
1323	0.000154542	0.000259482	1.55545e-05	0	0.000298854	0.000850253
1324	0.000153156	0.000254095	1.95967e-05	0	0.0003065	0.000850891
1325	0.000151893	0.000248132	2.38006e-05	0	0.000314484	0.000851191
1326	0.000150667	0.000242185	2.81319e-05	0	0.000322682	0.000851209
1327	0.000149404	0.000236745	3.25765e-05	0	0.000330985	0.000850996
1328	0.000148048	0.000232176	3.71462e-05	0	0.000339299	0.000850596
1329	0.000146557	0.000228695	4.18818e-05	0	0.00034755	0.000850046
1330	0.000144913	0.000226374	4.68576e-05	0	0.000355687	0.000849371
1331	0.000143113	0.000225146	5.21824e-05	0	0.000363678	0.000848586
1332	0.000141173	0.000224824	5.80016e-05	0	0.000371509	0.000847696
1333	0.000139124	0.000225125	6.44964e-05	0	0.000379182	0.000846693
1334	0.000137013	0.000225698	7.18796e-05	0	0.000386711	0.000845556
1335	0.000134897	0.000226159	8.03869e-05	0	0.000394122	0.000844252
1336	0.000132844	0.000226119	9.02598e-05	0	0.000401445	0.000842738
1337	0.000130926	0.000225226	0.00010172	0	0.000408713	0.000840962
1338	0.000129212	0.000223195	0.000114932	0	0.000415956	0.000838874
1339	0.000127768	0.000219851	0.000129961	0	0.000423202	0.000836427
1340	0.000126646	0.00021515	0.000146727	0	0.000430467	0.00083359
1341	0.00012588	0.000209199	0.000164965	0	0.00043776	0.000830353
1342	0.000125485	0.000202269	0.000184204	0	0.000445076	0.000826735
1343	0.000125447	0.000194775	0.000203775	0	0.000452394	0.000822786
1344	0.000125732	0.000187259	0.000222849	0	0.000459685	0.000818587
1345	0.000126284	0.000180339	0.000240519	0	0.000466902	0.000814243
1346	0.000127026	0.000174664	0.000255895	0	0.000473986	0.000809879
1347	0.000127873	0.000170854	0.000268226	0	0.000480868	0.000805623
1348	0.000128732	0.000169486	0.000276945	0	0.000487463	0.000801601
1349	0.000129514	0.000170964	0.000281881	0	0.000493682	0.000797921
1350	0.000130142	0.000175507	0.000283227	0	0.000499444	0.000794656
1351	0.000130558	0.000183183	0.000281461	0	0.000504668	0.00079185
1352	0.000130729	0.000193889	0.000277298	0	0.000509294	0.000789513
1353	0.000130655	0.000207362	0.000271588	0	0.000513282	0.000787619
1354	0.000130368	0.000223201	0.000265204	0	0.000516629	0.00078611
1355	0.000129937	0.00024089	0.000258939	0	0.000519368	0.000784899
1356	0.000129469	0.000259827	0.000253433	0	0.000521574	0.000783873
1357	0.000129099	0.000279352	0.000249136	0	0.000523358	0.000782901
1358	0.000128991	0.00029878	0.000246299	0	0.000524862	0.000781836
1359	0.000129322	0.000317435	0.000245	0	0.000526248	0.000780525
1360	0.000130273	0.000334694	0.000245181	0	0.000527685	0.000778818
1361	0.000132012	0.000350026	0.000246698	0	0.000529333	0.000776571
1362	0.000134684	0.000363036	0.000249359	0	0.000531326	0.000773665
1363	0.000138395	0.000373503	0.000252966	0	0.000533764	0.000770005
1364	0.000143206	0.000381398	0.000257343	0	0.0005367	0.000765535
1365	0.000149124	0.000386895	0.000262351	0	0.000540141	0.000760236
1366	0.000156101	0.00039035	0.000267903	0	0.000544042	0.000754131
1367	0.000164042	0.000392268	0.000273974	0	0.000548318	0.000747278
1368	0.000172812	0.000393247	0.000280603	0	0.000552854	0.000739766
1369	0.000182246	0.000393908	0.000287897	0	0.000557519	0.000731702
1370	0.000192164	0.00039483	0.000296032	0	0.000562181	0.000723205
1371	0.000202385	0.000396484	0.000305252	0	0.00056672	0.000714394
1372	0.000212734	0.000399192	0.00031587	0	0.000571036	0.000705377
1373	0.000223053	0.000403098	0.000328268	0	0.000575063	0.000696252
1374	0.000233202	0.000408172	0.000342893	0	0.000578758	0.000687096
1375	0.000243056	0.000414234	0.000360271	0	0.000582107	0.000677972
1376	0.000252507	0.000420993	0.000381007	0	0.000585112	0.000668928
1377	0.000261453	0.000428096	0.000405804	0	0.000587782	0.000659999
1378	0.000269796	0.00043518	0.000435475	0	0.00059012	0.000651213
1379	0.000277435	0.000441914	0.00047095	0	0.000592118	0.000642591
1380	0.000284263	0.000448033	0.000513266	0	0.000593751	0.000634152
1381	0.000290171	0.000453354	0.000563528	0	0.000594974	0.000625911
1382	0.000295049	0.000457795	0.000622841	0	0.00059573	0.000617881
1383	0.000298797	0.000461371	0.00069219	0	0.000595955	0.000610076
1384	0.000301326	0.000464208	0.0007723	0	0.000595597	0.00060251
1385	0.000302577	0.000466539	0.00086347	0	0.000594623	0.000595197
1386	0.000302522	0.000468705	0.000965447	0	0.000593036	0.000588155
1387	0.000301171	0.000471147	0.00107736	0	0.000590884	0.000581406
1388	0.000298579	0.000474376	0.00119774	0	0.000588255	0.000574968
1389	0.000294836	0.00047892	0.00132473	0	0.000585278	0.000568855
1390	0.000290055	0.000485278	0.00145635	0	0.000582101	0.00056307
1391	0.000284386	0.000493774	0.00159085	0	0.000578875	0.000557586
1392	0.000277989	0.000504459	0.0017272	0	0.000575724	0.000552339
1393	0.000271005	0.000517089	0.00186546	0	0.000572718	0.000547232
1394	0.000263551	0.000531074	0.00200699	0	0.000569862	0.00054213
1395	0.000255709	0.000545496	0.00215446	0	0.000567082	0.000536867
1396	0.000247523	0.000559155	0.00231179	0	0.00056423	0.000531257
1397	0.000238995	0.000570654	0.00248387	0	0.000561087	0.000525103
1398	0.000230088	0.000578484	0.00267632	0	0.000557378	0.000518205
1399	0.000220732	0.000581107	0.0028952	0	0.000552786	0.000510371
1400	0.000210837	0.000577023	0.00314677	0	0.000546968	0.000501412
1401	0.0002003	0.000564832	0.00343725	0	0.000539571	0.000491141
1402	0.000189019	0.000543302	0.00377258	0	0.000530245	0.000479375
1403	0.000176904	0.000511454	0.00415813	0	0.000518659	0.000465935
1404	0.000163889	0.000468672	0.00459825	0	0.000504521	0.000450658
1405	0.000149939	0.00041483	0.00509586	0	0.000487595	0.000433406
1406	0.000135056	0.000350392	0.005652	0	0.000467714	0.000414091
1407	0.000119287	0.000276482	0.00626546	0	0.000444802	0.000392686
1408	0.000102719	0.000194862	0.0069327	0	0.000418871	0.00036924
1409	8.5481e-05	0.000107826	0.00764797	0	0.000390027	0.000343877
1410	6.77375e-05	1.80081e-05	0.00840367	0	0.000358458	0.00031679
1411	4.80751e-05	0	0.00916843	0	0.000314315	0.000287169
1412	2.79721e-05	0	0.00995022	0	0.000265852	0.000256135
1413	8.11611e-06	0	0.0107454	0	0.000216297	0.000224303
1414	0	0	0.0115443	0	0.000164897	0.000187518
1415	0	0	0.0123375	0	0.000112828	0.000147738
1416	0	0	0.0131151	0	6.18528e-05	0.000108757
1417	0	0	0.0138671	0	1.27271e-05	7.11281e-05
1418	0	0	0.0145748	0	0	2.31922e-05
1419	0	0	0.0152202	0	0	0
1420	0	0	0.015799	0	0	0
1421	0	0	0.0163136	0	0	0
1422	0	0	0.0167565	0	0	0
1423	0	0	0.0171225	0	0	0
1424	0	0	0.0174098	0	0	0
1425	0	0	0.0176207	0	0	0
1426	0	0	0.0177609	0	0	0
1427	0	0	0.0178401	0	0	0
1428	0	0	0.0178696	7.65977e-06	0	0
1429	0	0	0.0178625	1.91822e-05	0	0
1430	0	0	0.0178312	2.3782e-05	0	0
1431	0	0	0.0177859	1.97478e-05	0	0
1432	0	0	0.0177332	5.9794e-06	0	0
1433	0	0	0.0176753	0	0	0
1434	0	0	0.0176114	0	0	0
1435	0	0	0.0175378	0	0	0
1436	0	0	0.0174492	0	0	0
1437	0	0	0.0173396	0	0	0
1438	0	0	0.0172036	0	0	0
1439	0	0	0.0170371	0	0	0
1440	0	0	0.0168367	0	0	0
1441	0	0	0.0166002	0	0	0
1442	0	0	0.0163251	0	0	0
1443	0	0	0.0159943	0	0	2.9008e-05
1444	0	1.56318e-05	0.0156117	0	0	6.06133e-05
1445	0	6.69619e-05	0.0151665	0	0	9.33062e-05
1446	0	0.00012455	0.0146649	0	0	0.000129651
1447	0	0.000188253	0.0141035	0	0	0.000169916
1448	0	0.000257572	0.0134814	0	0	0.000214228
1449	2.4649e-05	0.000329557	0.0127998	0	0	0.000251569
1450	4.75324e-05	0.000391616	0.0120614	0	3.48307e-05	0.000281683
1451	7.15679e-05	0.00045069	0.0112778	0	8.00163e-05	0.000310854
1452	9.77822e-05	0.000506792	0.0104625	0	0.000128907	0.000340008
1453	0.000125816	0.000557808	0.00963069	0	0.000180513	0.000368616
1454	0.000155215	0.000601881	0.00879871	0	0.000233676	0.000396162
1455	0.000185461	0.00063766	0.00798259	0	0.000287165	0.000422192
1456	0.000216011	0.000664476	0.00719658	0	0.000339776	0.000446357
1457	0.000246341	0.000682424	0.00645218	0	0.000390428	0.000468438
1458	0.000275981	0.000692312	0.00575745	0	0.000438231	0.000488344
1459	0.000304549	0.000695515	0.00511698	0	0.000482529	0.000506102
1460	0.000331768	0.000693739	0.00453221	0	0.000522916	0.000521817
1461	0.000357473	0.000688748	0.00400217	0	0.000559213	0.000535631
1462	0.000381607	0.000682115	0.0035243	0	0.000591439	0.000547687
1463	0.00040421	0.000675022	0.00309534	0	0.000619757	0.000558092
1464	0.000425393	0.000668153	0.00271197	0	0.000644428	0.000566898
1465	0.00044532	0.000661687	0.00237123	0	0.000665766	0.000574106
1466	0.000464184	0.000655376	0.0020706	0	0.000684106	0.000579674
1467	0.000482177	0.000648691	0.00180797	0	0.00069978	0.000583544
1468	0.000499481	0.000640996	0.0015813	0	0.000713109	0.000585671
1469	0.000516249	0.000631718	0.00138835	0	0.000724395	0.000586048
1470	0.000532597	0.000620486	0.00122644	0	0.000733926	0.000584728
1471	0.000548601	0.000607203	0.0010923	0	0.000741971	0.000581828
1472	0.0005643	0.00059207	0.000982121	0	0.000748781	0.000577533
1473	0.000579695	0.000575542	0.000891719	0	0.000754588	0.000572074
1474	0.000594761	0.000558235	0.000816887	0	0.000759596	0.000565702
1475	0.00060945	0.000540846	0.00075355	0	0.000763983	0.000558681
1476	0.000623713	0.000524003	0.000697956	0	0.00076791	0.000551256
1477	0.000637494	0.000508177	0.000647336	0	0.000771491	0.000543622
1478	0.000650741	0.000493646	0.00059976	0	0.000774809	0.000535917
1479	0.000663406	0.000480487	0.000554123	0	0.000777923	0.000528226
1480	0.000675449	0.000468607	0.000510024	0	0.000780862	0.000520586
1481	0.000686838	0.000457796	0.000467593	0	0.000783639	0.000512997
1482	0.000697541	0.000447798	0.000427289	0	0.000786251	0.000505433
1483	0.000707528	0.000438371	0.000389713	0	0.000788677	0.00049786
1484	0.000716764	0.000429341	0.000355463	0	0.000790887	0.000490247
1485	0.00072521	0.000420618	0.000325048	0	0.000792838	0.000482574
1486	0.000732819	0.000412203	0.000298848	0	0.000794478	0.000474834
1487	0.000739539	0.000404162	0.000277123	0	0.000795744	0.00046704
1488	0.000745316	0.000396591	0.000260041	0	0.000796572	0.000459216
1489	0.000750097	0.000389578	0.000247709	0	0.000796894	0.000451397
1490	0.000753836	0.000383165	0.000240196	0	0.000796648	0.000443623
1491	0.000756499	0.000377325	0.00023752	0	0.000795785	0.000435936
1492	0.000758069	0.00037196	0.000239613	0	0.000794274	0.000428375
1493	0.000758552	0.000366917	0.000246254	0	0.000792107	0.000420974
1494	0.000757979	0.000362018	0.00025699	0	0.000789307	0.000413765
1495	0.000756405	0.000357108	0.000271058	0	0.000785928	0.000406779
1496	0.000753911	0.000352098	0.000287344	0	0.000782053	0.000400044
1497	0.000750596	0.000347	0.000304382	0	0.000777788	0.000393589
1498	0.000746577	0.000341945	0.000320428	0	0.000773257	0.000387442
1499	0.000741977	0.000337172	0.000333604	0	0.000768587	0.000381629
1500	0.00073692	0.000332992	0.000342099	0	0.000763897	0.000376166
1501	0.000731524	0.00032974	0.000344389	0	0.000759282	0.000371058
1502	0.000725893	0.000327706	0.000339458	0	0.000754804	0.000366293
1503	0.000720114	0.000327085	0.000326948	0	0.000750483	0.00036184
1504	0.000714251	0.000327935	0.000307226	0	0.000746296	0.000357646
1505	0.000708348	0.000330167	0.000281339	0	0.00074218	0.000353646
1506	0.000702427	0.000333548	0.000250869	0	0.000738041	0.000349764
1507	0.000696498	0.000337741	0.000217716	0	0.000733769	0.000345927
1508	0.000690559	0.000342341	0.000183844	0	0.00072925	0.00034207
1509	0.000684606	0.000346921	0.000151049	0	0.000724383	0.000338144
1510	0.000678637	0.00035106	0.000120777	0	0.000719091	0.000334119
1511	0.000672657	0.000354367	9.4022e-05	0	0.000713329	0.000329987
1512	0.000666683	0.000356488	7.13074e-05	0	0.000707089	0.000325753
1513	0.000660744	0.000357103	5.27452e-05	0	0.000700396	0.000321435
1514	0.000654884	0.000355926	3.81413e-05	0	0.000693303	0.00031705
1515	0.000649155	0.000352709	2.71256e-05	0	0.000685883	0.000312609
1516	0.000643617	0.000347236	1.92897e-05	0	0.000678215	0.000308116
1517	0.000638335	0.00033934	1.42874e-05	0	0.000670377	0.000303559
1518	0.000633357	0.00032902	1.17972e-05	0	0.000662438	0.000298915
1519	0.000628724	0.000316355	1.16656e-05	0	0.000654444	0.000294157
1520	0.000624462	0.000301562	1.38144e-05	0	0.000646418	0.000289253
1521	0.000620574	0.000285005	1.81734e-05	0	0.000638363	0.000284185
1522	0.000617047	0.000267193	2.45973e-05	0	0.000630265	0.000278942
1523	0.00061385	0.000248761	3.27892e-05	0	0.000622102	0.00027354
1524	0.000610937	0.000230431	4.2248e-05	0	0.00061385	0.00026801
1525	0.000608257	0.000212965	5.22588e-05	0	0.00060549	0.000262408
1526	0.000605755	0.000197101	6.19332e-05	0	0.000597018	0.000256803
1527	0.000603378	0.000183489	7.02984e-05	0	0.000588446	0.000251272
1528	0.000601082	0.000172627	7.64199e-05	0	0.000579801	0.000245889
1529	0.000598833	0.000164816	7.9536e-05	0	0.000571125	0.000240716
1530	0.000596609	0.000160127	7.91748e-05	0	0.000562473	0.000235797
1531	0.000594398	0.000158396	7.5229e-05	0	0.000553901	0.000231148
1532	0.0005922	0.000159251	6.79737e-05	0	0.000545471	0.000226763
1533	0.000590021	0.000162155	5.80223e-05	0	0.000537241	0.000222611
1534	0.000587872	0.000166467	4.62339e-05	0	0.000529265	0.000218645
1535	0.000585767	0.000171511	3.35929e-05	0	0.000521592	0.000214808
1536	0.000583721	0.000176637	2.10869e-05	0	0.000514267	0.00021104
1537	0.000581743	0.000181274	9.60639e-06	0	0.000507331	0.000207286
1538	0.000579842	0.000184921	0	0	0.000500812	0.000203496
1539	0.000577961	0.000184983	0	0	0.000494473	0.000199335
1540	0.000576178	0.000184365	0	0	0.000488705	0.000195199
1541	0.000574486	0.000183027	0	0	0.000483531	0.00019109
1542	0.00057287	0.000180987	0	0	0.000478958	0.000187013
1543	0.000571308	0.000178322	0	0	0.00047498	0.000182981
1544	0.000569774	0.000175158	0	0	0.00047158	0.000179013
1545	0.000568172	0.000169268	7.63776e-06	0	0.000468445	0.000174812
1546	0.000566498	0.000161941	1.94292e-05	0	0.000465667	0.000170553
1547	0.000564739	0.000154204	3.27893e-05	0	0.0004633	0.000166376
1548	0.000562868	0.000146541	4.68835e-05	0	0.000461329	0.000162347
1549	0.000560867	0.000139482	6.0699e-05	0	0.000459747	0.000158538
1550	0.000558725	0.000133566	7.31194e-05	0	0.000458552	0.000155024
1551	0.000556441	0.000129289	8.30362e-05	0	0.000457752	0.000151872
1552	0.000554022	0.000127058	8.9482e-05	0	0.000457355	0.000149138
1553	0.000551485	0.000127135	9.17589e-05	0	0.000457373	0.000146858
1554	0.000548856	0.000129612	8.95374e-05	0	0.000457813	0.000145048
1555	0.000546164	0.000134391	8.29019e-05	0	0.000458681	0.000143699
1556	0.000543443	0.000141203	7.23349e-05	0	0.000459975	0.000142781
1557	0.000540729	0.000149638	5.86402e-05	0	0.00046169	0.000142246
1558	0.000538061	0.000159201	4.28221e-05	0	0.000463822	0.000142038
1559	0.000535474	0.000169366	2.5959e-05	0	0.000466371	0.000142097
1560	0.000533001	0.000179616	9.09163e-06	0	0.000469325	0.00014236
1561	0.000530615	0.000187359	0	0	0.000472426	0.000142485
1562	0.000528335	0.000192064	0	0	0.000475651	0.000142401
1563	0.000526258	0.000196502	0	0	0.000479361	0.000142479
1564	0.000524399	0.000200647	0	0	0.00048357	0.000142707
1565	0.000522769	0.000204518	0	0	0.000488285	0.000143076
1566	0.00052137	0.000208179	0	0	0.000493508	0.000143578
1567	0.000520201	0.000211729	0	0	0.000499233	0.000144205
1568	0.000519253	0.000215296	0	0	0.000505453	0.000144952
1569	0.000518518	0.00021903	0	0	0.000512153	0.000145813
1570	0.000517981	0.00022309	0	0	0.00051932	0.000146787
1571	0.00051763	0.000227637	0	0	0.000526937	0.000147871
1572	0.000517446	0.000232826	0	0	0.000534989	0.000149064
1573	0.000517416	0.000238799	0	0	0.000543461	0.000150367
1574	0.000517521	0.000245678	0	0	0.000552342	0.000151784
1575	0.000517748	0.000253556	0	0	0.000561623	0.000153317
1576	0.000518082	0.00026249	0	0	0.0005713	0.000154972
1577	0.000518511	0.000272502	0	0	0.000581376	0.000156758
1578	0.000519024	0.000283567	0	0	0.000591856	0.000158681
1579	0.000519614	0.000295617	0	0	0.000602753	0.000160752
1580	0.000520276	0.000308536	0	0	0.000614086	0.000162981
1581	0.000521007	0.000322163	0	0	0.000625879	0.000165379
1582	0.00052181	0.000336291	0	0	0.000638161	0.000167956
1583	0.000522692	0.000350667	0	0	0.000650968	0.000170722
1584	0.000523662	0.000365002	0	0	0.000664339	0.000173686
1585	0.000524735	0.00037897	0	0	0.000678318	0.000176854
1586	0.000525931	0.000392221	0	0	0.00069295	0.000180231
1587	0.000527272	0.000404395	0	0	0.000708281	0.000183818
1588	0.000528785	0.000415137	0	0	0.000724357	0.000187613
1589	0.000530498	0.000424122	0	0	0.00074122	0.000191606
1590	0.00053244	0.000431079	0	0	0.000758903	0.000195787
1591	0.000534638	0.000435817	0	0	0.000777432	0.000200136
1592	0.000537117	0.000438245	0	0	0.000796818	0.00020463
1593	0.000539897	0.000438389	0	0	0.000817059	0.000209241
1594	0.000542995	0.000436399	0	0	0.000838135	0.000213935
1595	0.000546418	0.000432548	0	0	0.000860011	0.000218676
1596	0.000550168	0.000427214	0	0	0.000882637	0.000223428
1597	0.000554241	0.000420859	0	0	0.000905949	0.000228154
1598	0.000558626	0.000413998	0	0	0.000929874	0.000232822
1599	0.000563309	0.00040716	0	0	0.000954333	0.000237404
1600	0.000568271	0.000400855	0	0	0.000979243	0.000241878
1601	0.000573457	0.000394006	5.00472e-06	0	0.00100434	0.000246018
1602	0.000578882	0.000388581	9.87659e-06	0	0.00102974	0.000250036
1603	0.000584558	0.000386038	1.0838e-05	0	0.00105551	0.000254093
1604	0.000590467	0.000386501	8.02711e-06	0	0.00108157	0.000258194
1605	0.000596591	0.000389876	1.94436e-06	0	0.00110788	0.000262333
1606	0.000602855	0.000393812	0	0	0.00113409	0.000266215
1607	0.000609268	0.000398894	0	0	0.00116027	0.000269954
1608	0.000615837	0.000405582	0	0	0.00118645	0.00027365
1609	0.000622552	0.000413707	0	0	0.00121259	0.000277321
1610	0.000629404	0.000423109	0	0	0.00123868	0.000280978
1611	0.000636378	0.000433659	0	0	0.00126468	0.000284629
1612	0.000643458	0.000445282	0	0	0.00129055	0.000288275
1613	0.000650624	0.000457961	0	0	0.00131625	0.000291909
1614	0.000657848	0.000471734	0	0	0.00134173	0.00029552
1615	0.000665102	0.000486687	0	0	0.00136694	0.000299094
1616	0.00067235	0.000502927	0	0	0.00139182	0.000302611
1617	0.000679555	0.00052055	0	0	0.00141633	0.000306055
1618	0.000686679	0.000539613	0	0	0.0014404	0.000309407
1619	0.000693683	0.000560097	0	0	0.00146401	0.000312658
1620	0.000700533	0.000581886	0	0	0.00148711	0.000315799
1621	0.000707195	0.000604755	0	0	0.00150968	0.000318832
1622	0.000713639	0.000628366	0	0	0.00153171	0.000321763
1623	0.00071984	0.000652293	0	0	0.00155321	0.000324605
1624	0.000725775	0.000676054	0	0	0.00157417	0.000327375
1625	0.000731424	0.000699156	0	0	0.00159461	0.000330091
1626	0.000736765	0.000721148	0	0	0.00161452	0.000332771
1627	0.000741778	0.000741673	0	0	0.00163391	0.000335427
1628	0.000746437	0.000760511	0	0	0.00165276	0.000338068
1629	0.000750718	0.000777609	0	0	0.00167105	0.000340693
1630	0.00075459	0.000793089	0	0	0.00168872	0.000343291
1631	0.000758023	0.000807234	0	0	0.00170573	0.000345845
1632	0.000760989	0.000820453	0	0	0.00172202	0.000348327
1633	0.000763462	0.000833231	0	0	0.0017375	0.000350704
1634	0.000765425	0.000846061	0	0	0.00175212	0.000352939
1635	0.00076687	0.000859382	0	0	0.00176582	0.000354994
1636	0.000767805	0.000873524	0	0	0.00177855	0.000356827
1637	0.000768252	0.000888666	0	0	0.00179029	0.000358403
1638	0.000768246	0.000904826	0	0	0.00180102	0.000359684
1639	0.00076784	0.000921877	0	0	0.00181075	0.00036064
1640	0.000767092	0.000939593	0	0	0.0018195	0.00036124
1641	0.000766068	0.000957714	0	0	0.00182729	0.000361456
1642	0.000764831	0.000976037	0	0	0.00183411	0.000361264
1643	0.000763435	0.000994504	0	0	0.00183995	0.000360627
1644	0.000761924	0.00101328	0	0	0.00184478	0.000359529
1645	0.000760321	0.00103281	0	0	0.00184853	0.000357948
1646	0.000758627	0.00105382	0	0	0.00185111	0.000355863
1647	0.000756821	0.00107731	0	0	0.00185237	0.000353258
1648	0.00075486	0.00110449	0	0	0.00185216	0.000350124
1649	0.000752685	0.00113671	0	0	0.00185031	0.000346461
1650	0.000750225	0.00117534	0	0	0.00184663	0.00034228
1651	0.0007474	0.00122168	0	0	0.00184098	0.000337609
1652	0.000744129	0.00127684	0	0	0.00183319	0.00033249
1653	0.000740334	0.00134169	0	0	0.00182316	0.000326981
1654	0.000735943	0.00141681	0	0	0.00181081	0.000321155
1655	0.000730895	0.00150245	0	0	0.0017961	0.000315095
1656	0.000725142	0.0015986	0	0	0.00177903	0.000308889
1657	0.00071865	0.001705	0	0	0.00175963	0.000302626
1658	0.000711401	0.00182129	0	0	0.00173795	0.000296381
1659	0.000703393	0.00194702	0	0	0.00171407	0.000290208
1660	0.000694641	0.00208185	0	0	0.00168807	0.000284132
1661	0.000685177	0.00222558	0	0	0.00166002	0.000278136
1662	0.000675047	0.00237825	0	0	0.00163	0.000272163
1663	0.000664313	0.0025402	0	0	0.00159805	0.000266105
1664	0.000653046	0.00271204	0	0	0.00156423	0.000259815
1665	0.000641326	0.00289466	0	0	0.00152853	0.000253113
1666	0.000629234	0.00308918	0	0	0.00149096	0.000245796
1667	0.000616848	0.00329681	0	0	0.00145149	0.000237661
1668	0.000604239	0.00351878	0	0	0.00141008	0.000228517
1669	0.000591461	0.00375624	0	0	0.00136668	0.000218211
1670	0.000578553	0.00401015	0	0	0.00132124	0.000206634
1671	0.000565527	0.0042812	0	0	0.0012737	0.000193741
1672	0.000552376	0.00456979	0	0	0.001224	0.00017955
1673	0.000539062	0.00487604	0	0	0.00117211	0.000164144
1674	0.000525526	0.00519981	0	0	0.00111797	0.000147663
1675	0.000511685	0.00554078	0	0	0.00106154	0.000130289
1676	0.000497432	0.00589851	0	0	0.00100279	0.000112234
1677	0.000482647	0.00627254	0	0	0.00094171	9.37238e-05
1678	0.000467195	0.00666242	0	0	0.000878276	7.49835e-05
1679	0.000450936	0.00706767	0	0	0.000812503	5.62283e-05
1680	0.000433732	0.00748776	0	0	0.000744436	3.76577e-05
1681	0.000415457	0.00792198	0	0	0.000674164	1.94565e-05
1682	0.000396004	0.00836928	0	0	0.000601848	1.79875e-06
1683	0.000362321	0.00882675	0	0	0.00052324	0
1684	0.000326576	0.00929335	0	0	0.0004429	0
1685	0.000290487	0.00976622	0	0	0.000361861	0
1686	0.000254315	0.0102412	0	0	0.000280762	0
1687	0.000218378	0.0107135	0	0	0.000200316	0
1688	0.000183048	0.0111778	0	0	0.000121301	0
1689	0.000148732	0.0116283	0	0	4.4522e-05	0
1690	0.000102452	0.0120464	0	0	0	0
1691	3.93248e-05	0.0124216	0	0	0	0
1692	0	0.0127629	0	0	0	0
1693	0	0.0130618	0	0	0	0
1694	0	0.0133289	0	0	0	0
1695	0	0.0135627	0	0	0	0
1696	0	0.0137626	0	0	0	0
1697	0	0.0139289	0	0	0	0
1698	0	0.014062	0	0	0	0
1699	0	0.0141629	0	0	0	0
1700	0	0.0142325	0	0	0	0
1701	0	0.0142512	5.67064e-05	0	0	0
1702	0	0.0142247	0.00015611	0	0	0
1703	0	0.0141666	0.000261818	0	0	0
1704	0	0.014078	0.000371766	0	0	0
1705	0	0.0139598	0.000484385	0	0	0
1706	0	0.0138125	0.000598758	0	0	0
1707	0	0.0136368	0.000714692	0	0	0
1708	0	0.0134332	0.000832706	0	0	0
1709	0	0.0132024	0.000953934	0	0	0
1710	0	0.0129453	0.00107996	0	0	0
1711	0	0.0126633	0.00121257	0	0	0
1712	0	0.0123579	0.00135349	0	0	0
1713	0	0.0120312	0.00150406	0	0	0
1714	0	0.0116855	0.00166496	0	0	0
1715	0	0.0113234	0.00183598	0	0	0
1716	0	0.0109481	0.00201583	0	0	0
1717	0	0.0105625	0.00220219	0	0	0
1718	0	0.0101652	0.00238788	0	0	1.12722e-05
1719	0	0.00976205	0.00257067	1.07063e-05	0	2.73271e-05
1720	4.14186e-06	0.009358	0.0027469	6.35294e-05	0	4.03371e-05
1721	4.35801e-05	0.00895016	0.0029115	0.000115017	1.04262e-05	3.37729e-05
1722	7.17539e-05	0.00852684	0.00305611	0.000169833	7.96559e-05	1.24569e-05
1723	9.22044e-05	0.00811101	0.00318106	0.000225845	0.000148207	0
1724	0.000101919	0.00770567	0.00328285	0.000282425	0.000214654	0
1725	0.000111515	0.00731459	0.00336086	0.00033882	0.000282144	0
1726	0.000120944	0.00694098	0.00341365	0.000394797	0.000350145	0
1727	0.000130108	0.00658831	0.00344009	0.000450305	0.00041807	0
1728	0.000138881	0.0062594	0.00344036	0.000505378	0.000485308	0
1729	0.00014713	0.00595658	0.00341521	0.000559958	0.000551286	0
1730	0.000154729	0.0056817	0.0033657	0.000613729	0.000615483	0
1731	0.000161575	0.00543579	0.00329342	0.000665987	0.000677458	0
1732	0.000167609	0.00521894	0.00320047	0.000715553	0.00073687	0
1733	0.000172815	0.00503014	0.00308944	0.000760782	0.000793489	0
1734	0.000177226	0.00486734	0.0029634	0.000799656	0.000847196	0
1735	0.000180913	0.00472755	0.00282583	0.000829974	0.000897977	0
1736	0.000183979	0.00460699	0.00268057	0.000849602	0.000945912	0
1737	0.00018654	0.00450139	0.00253162	0.000856751	0.000991156	0
1738	0.000188715	0.00440623	0.00238301	0.000850245	0.00103392	0
1739	0.00019061	0.00431712	0.00223856	0.000829727	0.00107446	0
1740	0.000192312	0.00423001	0.00210162	0.00079577	0.00111305	0
1741	0.000193886	0.00414147	0.00197488	0.000749874	0.00115	0
1742	0.000195379	0.00404884	0.00186015	0.000694349	0.0011856	0
1743	0.000196816	0.00395036	0.00175821	0.000632091	0.00122016	0
1744	0.000198216	0.00384517	0.00166886	0.000566291	0.00125397	0
1745	0.000199587	0.00373323	0.00159098	0.000500125	0.00128729	0
1746	0.000200927	0.00361526	0.0015228	0.000436449	0.00132035	0
1747	0.000202226	0.00349253	0.00146219	0.000377563	0.00135329	0
1748	0.000200156	0.00336652	0.00140649	0.000325144	0.00138508	3.87236e-06
1749	0.000195599	0.00323916	0.00135399	0.000279996	0.00141603	1.05273e-05
1750	0.000191862	0.00311254	0.00130383	0.00024214	0.0014472	1.60046e-05
1751	0.000188854	0.00298852	0.00125514	0.000211098	0.00147844	2.03133e-05
1752	0.000186453	0.0028688	0.00120752	0.000185983	0.00150952	2.34927e-05
1753	0.000184515	0.00275487	0.00116082	0.000165703	0.00154021	2.56108e-05
1754	0.00018289	0.00264801	0.00111495	0.00014915	0.00157027	2.67634e-05
1755	0.00018143	0.00254928	0.00106971	0.000135357	0.00159946	2.70701e-05
1756	0.000180001	0.00245953	0.00102467	0.000123593	0.00162763	2.66689e-05
1757	0.000178486	0.00237938	0.000979207	0.000113405	0.00165464	2.57069e-05
1758	0.000176786	0.00230923	0.000932599	0.000104598	0.0016804	2.43292e-05
1759	0.000174822	0.00224927	0.000884204	9.71756e-05	0.00170484	2.26684e-05
1760	0.000172528	0.00219944	0.000833614	9.12422e-05	0.00172794	2.08351e-05
1761	0.000169852	0.00215945	0.000780774	8.69094e-05	0.00174968	1.89135e-05
1762	0.000166755	0.00212877	0.000726023	8.42029e-05	0.00177006	1.69604e-05
1763	0.000163208	0.00210662	0.000670049	8.29956e-05	0.00178908	1.50092e-05
1764	0.000159195	0.00209199	0.000613774	8.29733e-05	0.00180679	1.30766e-05
1765	0.000154719	0.00208363	0.000558212	8.36373e-05	0.00182325	1.11698e-05
1766	0.0001498	0.0020801	0.000504334	8.43428e-05	0.0018386	9.2929e-06
1767	0.000144484	0.00207973	0.000452952	8.43658e-05	0.001853	7.45016e-06
1768	0.000138837	0.0020807	0.000404664	8.29907e-05	0.00186667	5.64734e-06
1769	0.00013295	0.00208106	0.000359885	7.95698e-05	0.00187986	3.89028e-06
1770	0.000126941	0.00207878	0.00031876	7.36764e-05	0.00189289	2.18019e-06
1771	0.000120937	0.00207197	0.000281246	6.51688e-05	0.00190605	5.10531e-07
1772	0.000114108	0.00205885	0.000247088	5.41953e-05	0.00191931	0
1773	0.000107113	0.00203796	0.000216223	4.1142e-05	0.00193311	0
1774	0.000100476	0.00200818	0.000188594	2.66334e-05	0.00194777	0
1775	9.42619e-05	0.00196876	0.000164161	1.14692e-05	0.00196343	0
1776	8.83979e-05	0.00191932	0.000142905	0	0.00198012	0
1777	8.26799e-05	0.00185992	0.000124853	0	0.00199783	0
1778	7.7438e-05	0.00179118	0.000110792	0	0.00201634	0
1779	7.2635e-05	0.00171401	0.000101229	0	0.00203542	0
1780	6.82128e-05	0.00162961	9.66519e-05	0	0.0020548	0
1781	6.41032e-05	0.00153944	9.73873e-05	0	0.00207416	0
1782	6.02406e-05	0.00144519	0.000103447	0	0.00209316	0
1783	5.65734e-05	0.00134863	0.000114398	0	0.00211151	0
1784	5.30719e-05	0.00125165	0.000129296	0	0.00212895	0
1785	4.97316e-05	0.00115608	0.000146705	0	0.00214527	0
1786	4.65709e-05	0.00106367	0.000164814	0	0.00216032	0
1787	4.36228e-05	0.00097601	0.000181645	0	0.002174	0
1788	4.09241e-05	0.000894436	0.0001953	0	0.00218627	0
1789	3.84482e-05	0.000819963	0.000204153	1.86429e-06	0.00219709	0
1790	3.59746e-05	0.00075321	0.000206919	1.33991e-05	0.00220649	0
1791	3.37768e-05	0.000694629	0.000203508	2.48083e-05	0.0022144	0
1792	3.18251e-05	0.000644258	0.000194164	3.57058e-05	0.00222081	0
1793	3.00669e-05	0.000601862	0.000179653	4.57042e-05	0.00222569	0
1794	2.84342e-05	0.000567003	0.000161092	5.44281e-05	0.00222905	0
1795	2.6851e-05	0.00053911	0.000139739	6.15336e-05	0.0022309	0
1796	2.5241e-05	0.000517553	0.000116798	6.67327e-05	0.00223128	0
1797	2.35328e-05	0.000501697	9.32805e-05	6.98179e-05	0.00223029	0
1798	2.16623e-05	0.000490944	6.99258e-05	7.06829e-05	0.00222804	0
1799	1.95725e-05	0.00048475	4.71906e-05	6.93366e-05	0.00222468	0
1800	1.72119e-05	0.000482621	2.52911e-05	6.5907e-05	0.0022204	0
1801	1.45323e-05	0.000484102	4.2745e-06	6.06341e-05	0.0022154	0
1802	1.08253e-05	0.00048373	0	5.25106e-05	0.00220912	0
1803	6.55934e-06	0.000484947	0	4.2982e-05	0.00220241	0
1804	1.86398e-06	0.000488566	0	3.28386e-05	0.00219574	0
1805	0	0.000493642	0	2.19173e-05	0.00218814	0
1806	0	0.000499607	0	1.07908e-05	0.00218024	0
1807	0	0.000505906	0	1.40431e-07	0.00217299	0
1808	0	0.00051149	0	0	0.00216661	0
1809	0	0.000515739	0	0	0.00216146	0
1810	0	0.000517781	0	0	0.00215783	0
1811	0	0.000516728	0	0	0.00215601	0
1812	0	0.000511804	0	0	0.00215624	0
1813	0	0.000502447	0	0	0.00215869	0
1814	0	0.000488262	0	0	0.0021635	0
1815	0	0.00046909	0	0	0.00217072	0
1816	0	0.000445029	0	0	0.00218037	0
1817	0	0.000416426	0	0	0.00219236	0
1818	0	0.000383861	0	0	0.00220655	0
1819	0	0.000348094	0	0	0.00222273	0
1820	0	0.000310012	0	0	0.00224065	0
1821	0	0.000270567	0	0	0.00226001	0
1822	0	0.000230711	0	0	0.00228047	0
1823	0	0.000191339	0	0	0.00230171	0
1824	0	0.000153248	0	0	0.00232337	0
1825	0	0.000117112	0	0	0.00234509	0
1826	0	8.34662e-05	0	0	0.00236654	0
1827	0	5.27132e-05	0	0	0.00238738	0
1828	0	2.51343e-05	0	0	0.00240729	0
1829	0	9.09939e-07	0	0	0.00242594	0
1830	0	0	0	0	0.00243908	0
1831	0	0	0	0	0.00245091	0
1832	0	0	0	0	0.00246134	0
1833	0	0	0	0	0.00247013	0
1834	0	0	0	0	0.00247704	0
1835	0	0	0	0	0.00248187	0
1836	0	0	0	0	0.00248443	0
1837	0	0	0	0	0.00248459	0
1838	0	0	0	0	0.00248221	0
1839	0	0	0	0	0.00247723	0
1840	0	0	0	0	0.00246958	0
1841	0	0	0	0	0.00245926	0
1842	0	0	0	0	0.00244628	0
1843	0	0	0	0	0.0024307	0
1844	0	4.03447e-06	0	0	0.00241181	0
1845	0	1.80588e-05	0	0	0.00238854	0
1846	0	3.19413e-05	0	0	0.00236308	0
1847	0	4.54644e-05	0	0	0.00233565	0
1848	0	5.84573e-05	0	0	0.00230651	0
1849	0	7.07763e-05	0	0	0.00227592	0
1850	0	8.22791e-05	0	0	0.00224418	0
1851	0	9.28e-05	0	0	0.00221157	0
1852	0	0.000102131	0	0	0.0021784	0
1853	0	0.00011	0	0	0.00214501	0
1854	0	0.00011609	0	0	0.00211171	0
1855	0	0.000120112	0	0	0.00207881	0
1856	0	0.000121782	0	0	0.00204659	0
1857	0	0.000120896	0	0	0.00201531	0
1858	0	0.00011732	0	2.20349e-06	0.00198515	0
1859	0	0.000111026	0	1.08786e-05	0.00195622	0
1860	0	0.000102421	0	1.91376e-05	0.00192868	0
1861	0	9.19139e-05	0	2.67726e-05	0.00190256	0
1862	0	8.00358e-05	0	3.3619e-05	0.00187788	0
1863	0	6.7377e-05	0	3.95627e-05	0.00185459	0
1864	0	5.4516e-05	0	4.45383e-05	0.00183263	0
1865	0	4.1945e-05	0	4.85199e-05	0.00181193	0
1866	0	3.00074e-05	0	5.15086e-05	0.00179244	0
1867	0	1.88598e-05	0	5.35182e-05	0.00177409	0
1868	0	8.4638e-06	0	5.45655e-05	0.00175686	0
1869	0	0	0	5.4571e-05	0.00174045	0
1870	0	0	0	5.30813e-05	0.00172349	0
1871	0	0	0	5.06787e-05	0.00170756	0
1872	0	0	0	4.73875e-05	0.0016926	0
1873	0	0	0	4.32689e-05	0.00167851	0
1874	0	0	0	3.84293e-05	0.00166523	0
1875	0	0	0	3.30206e-05	0.0016527	0
1876	0	0	0	2.72307e-05	0.00164087	0
1877	0	0	0	2.12676e-05	0.00162972	0
1878	0	0	0	1.53389e-05	0.00161923	0
1879	0	0	0	9.63137e-06	0.00160938	0
1880	0	0	0	4.29441e-06	0.00160017	0
1881	0	0	0	0	0.00159161	0
1882	0	0	0	0	0.00158364	0
1883	0	0	0	0	0.00157633	0
1884	0	0	0	0	0.00156967	0
1885	0	0	0	0	0.00156364	0
1886	0	0	0	0	0.00155825	0
1887	0	0	0	0	0.00155345	0
1888	0	0	0	0	0.00154923	0
1889	0	0	0	0	0.00154555	0
1890	0	0	0	0	0.00154236	0
1891	0	0	0	0	0.00153962	0
1892	0	0	0	0	0.00153726	0
1893	0	0	0	0	0.00153522	0
1894	0	0	0	0	0.00153342	0
1895	0	0	0	0	0.00153176	0
1896	0	0	0	0	0.00153016	0
1897	0	0	0	0	0.00152852	0
1898	0	0	0	0	0.00152672	0
1899	0	0	0	0	0.00152466	0
1900	0	0	0	0	0.00152223	0
1901	0	0	0	0	0.00151932	0
1902	0	0	0	0	0.00151583	0
1903	0	0	0	0	0.00151166	0
1904	0	0	0	0	0.00150673	0
1905	0	0	0	0	0.00150094	0
1906	0	0	0	0	0.00149425	0
1907	0	0	0	0	0.00148657	0
1908	0	0	0	0	0.00147789	0
1909	0	0	0	0	0.00146815	0
1910	0	0	0	0	0.00145734	0
1911	0	0	0	0	0.00144546	0
1912	0	0	0	0	0.00143252	0
1913	0	0	0	0	0.00141853	0
1914	0	0	0	0	0.00140353	0
1915	0	0	0	0	0.00138755	0
1916	0	0	0	0	0.00137065	0
1917	0	0	0	0	0.00135289	0
1918	0	0	0	0	0.00133435	0
1919	0	0	0	0	0.00131509	0
1920	0	0	0	0	0.0012952	0
1921	0	0	0	0	0.00127476	0
1922	0	0	0	0	0.00125388	0
1923	0	0	0	0	0.00123265	0
1924	0	0	0	0	0.00121116	0
1925	0	0	0	0	0.00118951	0
1926	0	0	0	0	0.00116779	0
1927	0	0	0	0	0.00114609	0
1928	0	0	0	0	0.00112452	0
1929	0	0	0	0	0.00110314	0
1930	0	0	0	0	0.00108205	0
1931	0	0	0	0	0.00106132	0
1932	0	0	0	0	0.00104101	0
1933	0	0	0	0	0.00102119	0
1934	0	0	0	0	0.00100192	0
1935	0	0	0	0	0.000983249	0
1936	0	0	0	0	0.000965215	0
1937	0	0	0	0	0.000947859	0
1938	4.93977e-06	0	0	0	0.000929274	0
1939	1.12552e-05	0	0	0	0.000910869	0
1940	1.72241e-05	0	0	0	0.000893333	0
1941	2.28583e-05	0	0	0	0.000876662	0
1942	2.81735e-05	0	0	0	0.000860846	0
1943	3.31887e-05	0	0	0	0.000845864	0
1944	3.7925e-05	0	0	0	0.000831691	0
1945	4.24056e-05	0	0	0	0.000818293	0
1946	4.66541e-05	0	0	0	0.000805633	0
1947	5.06943e-05	0	0	0	0.000793671	0
1948	5.4549e-05	0	0	0	0.000782367	0
1949	5.82394e-05	0	0	0	0.00077168	0
1950	6.17851e-05	0	0	0	0.000761568	0
1951	6.52031e-05	0	0	0	0.000751993	0
1952	6.85083e-05	0	0	0	0.000742916	0
1953	7.17134e-05	0	0	0	0.000734299	0
1954	7.48291e-05	0	0	0	0.000726107	0
1955	7.78642e-05	0	0	0	0.000718303	0
1956	8.0826e-05	0	0	0	0.000710851	0
1957	8.37196e-05	0	0	0	0.000703716	0
1958	8.65487e-05	0	0	0	0.000696862	0
1959	8.93143e-05	0	0	0	0.000690259	0
1960	9.20153e-05	0	0	0	0.000683877	0
1961	9.46469e-05	0	0	2.56237e-08	0.000677692	0
1962	9.71977e-05	0	0	2.12624e-07	0.000671684	0
1963	9.96629e-05	0	0	3.99159e-07	0.000665841	0
1964	0.00010203	0	0	5.8492e-07	0.000660154	0
1965	0.000104285	0	0	7.69583e-07	0.000654623	0
1966	0.00010641	0	0	9.52817e-07	0.000649248	0
1967	0.000108391	0	0	1.1343e-06	0.000644037	0
1968	0.00011021	0	0	1.31372e-06	0.000638997	0
1969	0.000111855	0	0	1.49081e-06	0.000634136	0
1970	0.000113311	0	0	1.66537e-06	0.00062946	0
1971	0.000114572	0	0	1.83726e-06	0.000624975	0
1972	0.000115631	0	0	2.00642e-06	0.000620681	0
1973	0.000116489	0	0	2.17291e-06	0.000616575	0
1974	0.000117148	0	0	2.33685e-06	0.000612648	0
1975	0.000117615	0	0	2.49848e-06	0.00060889	0
1976	0.000117902	0	0	2.65813e-06	0.000605285	0
1977	0.000118024	0	0	2.81622e-06	0.000601812	0
1978	0.000117997	0	0	2.97325e-06	0.000598447	0
1979	0.000117844	0	0	3.12978e-06	0.000595166	0
1980	0.000117585	0	0	3.28646e-06	0.00059194	0
1981	0.000117247	0	0	3.44395e-06	0.000588738	0
1982	0.000116856	0	0	3.60295e-06	0.000585528	0
1983	0.000116437	0	0	3.76415e-06	0.000582279	0
1984	0.000116018	0	0	3.92825e-06	0.000578959	0
1985	0.000115622	0	0	4.09591e-06	0.00057554	0
1986	0.000115275	0	0	4.26773e-06	0.000571991	0
1987	0.000114999	0	0	4.44428e-06	0.000568286	0
1988	0.000114816	0	0	4.62603e-06	0.000564402	0
1989	0.000114745	0	0	4.81339e-06	0.000560318	0
1990	0.0001148	0	0	5.00666e-06	0.000556018	0
1991	0.000114996	0	0	5.20603e-06	0.000551488	0
1992	0.000115342	0	0	5.41163e-06	0.000546722	0
1993	0.000115844	0	0	5.62347e-06	0.000541717	0
1994	0.000116506	0	0	5.84147e-06	0.000536475	0
1995	0.000117326	0	0	6.06546e-06	0.000531003	0
1996	0.000118301	0	0	6.29521e-06	0.000525315	0
1997	0.000119423	0	0	6.5304e-06	0.000519427	0
[truncated: 2,003 more rows]
[truncated: 73 more columns]

## Sheet: 7 Sources
Reconstructed Source Distributions										Compare Input & Reconstructed Sink Samples					Sink Sample Weights
Age (Ma)	Source 1	Source 2	Source 3	Source 4	Source 5	Source 6	Source 7				Mean		St. Dev.			Princeton, Bluestone, Hinton	Surprise Canyon3- 06GC149, Surprise_Cyn2, SurpriseC_Cngl	24PL09, 10JM94, 40JM94, 05PL15, 09LB04	Mauch_Chunk	KY-21-SG	Tonka	Stanley, Hot_spring	BC05	09-CM-699	MS11, MS10	MS01, MSGE313	BC01, BC02, CC01	ML01, MP-DZ1	1QZ19	SY-D, Watahomigi, Manakacha1	Tumbling Run, Pottsville Fm, OH-1-SS	Pocohontas, Lee, VA-1-GN	Racoon, Montevallo, Sewanee	KY-18-CB	OH-4-SN	BCRA-01-10	MB1-3, MB2-4, MB2-2, MB2-3, MB2-5, MB2-1, MB1-2, MB1-1	a16, a23, a29, a38, a48, a49, a50	46-1, 46-2	IB_AD, IB_M1, IB_M2	FCB_AD	FCB_A2	FCB_A1	S3	GS01, GS09	MS04, MS05, MS06	MC05, MC17	GS11, GS24	MC20
0	6.04391e-09	2.03582e-08	0	0	0	6.2925e-08	2.19442e-07			Cross-correlation	0.886501	±	0.103678		Weights Source 1	0.00204733	0.00186897	0.00103474	0.0100575	0.00218285	0	0.0344773	0.0032062	0.0191558	0	0	0.0301017	0.00758286	0.000666564	0.000872988	0.00429272	0.00211979	0.00541764	0.000663897	0	0.00802001	0.00263998	0.000771813	0.000351989	0.00103446	0.00632552	0.00198261	0.000892856	0.0179352	0	0	0.00499727	0	0.00563261
1	6.05476e-09	2.03945e-08	0	0	0	6.30412e-08	2.1983e-07			Likeness	0.839695	±	0.0696721		Weights Source 2	0.00728097	0.0571077	0.0186184	0	0.0404872	0.0119521	0.0158904	0.097241	0	0.097004	0.47286	0.468672	0.00568543	0.0448148	0.0987781	0.00231698	0.00319349	0.0244206	0.0256789	0.00604106	0.00697057	0.0251036	0.0295061	0.0165625	0.0345274	0.0116097	0.0355141	0.0134055	0.0425284	0.176353	0	0.165264	0.478778	0.0780809
2	6.07646e-09	2.0467e-08	0	0	0	6.32737e-08	2.20607e-07			Kuiper V Value	0.0870694	±	0.0637172		Weights Source 3	0.0273374	0.0647903	0.00195296	0.0506321	0.033146	0.00217379	0.0246969	0.159112	0.0498818	0.218798	0.17696	0.202343	0.0408295	0.0487514	0.0288309	0.0163767	0.0576689	0.016397	0.016401	0.0218027	0.0234422	0.0226812	0.0334166	0.0301967	0.0112056	0.0617857	0.0415697	0.01933	0.0187596	0.151076	0.0434437	0.110505	0.460473	0.12226
3	6.10903e-09	2.05758e-08	0	0	0	6.36226e-08	2.21772e-07			KS D Value	0.0616803	±	0.0534845		Weights Source 4	0.0107719	0.0644515	0.950465	0	0.0517599	0.963865	0.0601138	0.331723	0	0.093245	0.0288156	0.0237135	0.0129099	0.119128	0.135439	0.00149826	0.00334425	0.0771863	0.0636513	0.0115305	0.111042	0.0882641	0.070879	0.049538	0.110415	0.0300052	0.0581189	0.144774	0.0562728	0.0561946	0	0.128838	0	0.098885
4	6.15249e-09	2.0721e-08	0	0	0	6.40881e-08	2.23326e-07								Weights Source 5	0.721043	0.470353	0	0.587844	0.513102	0	0.476326	0.0663674	0.437204	0.409309	0.321365	0.0760537	0.511011	0.135728	0.21554	0.424584	0.764118	0.630073	0.508147	0.572668	0.600075	0.594807	0.494195	0.567452	0.464048	0.470978	0.46644	0.735406	0.514729	0.152121	0.956556	0.177909	0.0237026	0.163025
5	6.20686e-09	2.09027e-08	0	0	0	6.46707e-08	2.2527e-07			Number of sink samples	108				Weights Source 6	0.0996552	0.194305	0.0279292	0.144931	0.195227	0.00731905	0.0554734	0.342351	0.153406	0.181644	0	0.186483	0.1133	0.556224	0.455256	0.105139	0.115576	0.118094	0.278917	0.0711295	0.025899	0.219656	0.230024	0.242355	0.121964	0.150781	0.198859	0.057409	0.118499	0.464256	0	0.412487	0	0.437107
6	6.27218e-09	2.11208e-08	0	0	0	6.53707e-08	2.27604e-07			Mean Cross-correlation of sink samples	0.372				Weights Source 7	0.131864	0.147123	0	0.206535	0.164094	0.0146904	0.333022	0	0.340352	0	0	0.0126336	0.308681	0.0946868	0.0652826	0.445792	0.0539794	0.128411	0.106541	0.316828	0.224551	0.0468481	0.141208	0.0935443	0.256806	0.268515	0.197515	0.0287824	0.231276	0	0	0	0.0370465	0.0950103
7	6.34847e-09	2.13755e-08	0	0	0	6.61885e-08	2.3033e-07			Range Cross-correlation of sink samples	0.963
8	6.43579e-09	2.16669e-08	0	0	0	6.71247e-08	2.33448e-07			Mean Kuiper V value of sink samples	0.408				Cross-correlation	0.944216	0.952296	0.929135	0.900311	0.955427	0.924188	0.87547	0.606926	0.874885	0.860012	0.735144	0.873527	0.90698	0.929726	0.97119	0.786875	0.905082	0.915027	0.942142	0.901597	0.946918	0.927484	0.882492	0.89896	0.942593	0.919667	0.959277	0.915656	0.91303	0.968465	0.630142	0.935196	0.934944	0.880146
9	6.53418e-09	2.19952e-08	0	0	0	6.818e-08	2.36959e-07			Range Kuiper V value of sink samples	0.961				Likeness	0.860131	0.887115	0.83754	0.819619	0.886499	0.8286	0.821867	0.606728	0.827542	0.778822	0.703732	0.758213	0.860114	0.872257	0.915719	0.787194	0.850621	0.847436	0.864342	0.815226	0.852727	0.878348	0.872671	0.849345	0.875	0.84318	0.896031	0.82023	0.853063	0.882431	0.501108	0.860819	0.813392	0.859671
10	6.6437e-09	2.23604e-08	0	0	0	6.9355e-08	2.40866e-07			Final Residual	0.150714				Kuiper V Value	0.061326	0.0409398	0.145367	0.119882	0.0638773	0.122425	0.082473	0.251872	0.0879037	0.17385	0.0948895	0.0986378	0.0771631	0.0576081	0.0455628	0.085829	0.123996	0.0868137	0.0405046	0.0888224	0.0546302	0.0469589	0.0840716	0.0867724	0.0440956	0.0789288	0.043247	0.113558	0.0993869	0.0519544	0.466206	0.0828403	0.103556	0.0988664
11	6.76441e-09	2.27628e-08	0	0	0	7.06505e-08	2.45169e-07			Number of Iterations	200				KS D Value	0.0447664	0.0225783	0.112366	0.0885906	0.0376736	0.104434	0.0465396	0.208194	0.063375	0.0990953	0.0507175	0.0560941	0.0425904	0.0538103	0.0409592	0.0516141	0.0762336	0.0519798	0.0222513	0.0461665	0.0434326	0.0318195	0.0536447	0.0453487	0.0275853	0.0608736	0.0244518	0.0876154	0.0554129	0.0262742	0.314993	0.0639699	0.0832295	0.0759988
12	6.89637e-09	2.32024e-08	0	0	0	7.20675e-08	2.4987e-07
13	7.03967e-09	2.36795e-08	0	0	0	7.36067e-08	2.54971e-07
14	7.19437e-09	2.41943e-08	0	0	0	7.52693e-08	2.60473e-07
15	7.36056e-09	2.47469e-08	0	0	0	7.70563e-08	2.66379e-07
16	7.53834e-09	2.53376e-08	0	0	0	7.89688e-08	2.7269e-07
17	7.72778e-09	2.59666e-08	0	0	0	8.10081e-08	2.79409e-07
18	7.929e-09	2.66342e-08	0	0	0	8.31755e-08	2.86538e-07
19	8.14209e-09	2.73405e-08	0	0	0	8.54723e-08	2.94079e-07
20	8.36717e-09	2.80858e-08	0	0	0	8.78999e-08	3.02035e-07
21	8.60435e-09	2.88705e-08	0	0	0	9.046e-08	3.10407e-07
22	8.85373e-09	2.96947e-08	0	0	0	9.31539e-08	3.19199e-07
23	9.11546e-09	3.05588e-08	0	0	0	9.59834e-08	3.28413e-07
24	9.38964e-09	3.14629e-08	0	0	0	9.89501e-08	3.38051e-07
25	9.67642e-09	3.24075e-08	0	0	0	1.02056e-07	3.48116e-07
26	9.97591e-09	3.33928e-08	0	0	0	1.05302e-07	3.5861e-07
27	1.02883e-08	3.4419e-08	0	0	0	1.08692e-07	3.69536e-07
28	1.06136e-08	3.54865e-08	0	0	0	1.12226e-07	3.80898e-07
29	1.09521e-08	3.65955e-08	0	0	0	1.15906e-07	3.92696e-07
30	1.13039e-08	3.77464e-08	0	0	0	1.19735e-07	4.04933e-07
31	1.16691e-08	3.89394e-08	0	0	0	1.23715e-07	4.17613e-07
32	1.20479e-08	4.01749e-08	0	0	0	1.27848e-07	4.30737e-07
[truncated: 3,968 more rows]
[truncated: 74 more columns]

## Sheet: 8 Sources
Reconstructed Source Distributions											Compare Input & Reconstructed Sink Samples					Sink Sample Weights
[truncated: 4,002 more rows]
[truncated: 75 more columns]

[truncated: 23 more sheets: 8 sources transpose, 9 Sources, 10 Sources, 11 Sources, 12 Sources, 13 Sources, 14 Sources, 15 Sources, 16 Sources, 17 Sources, 18 Sources, 19 Sources, 20 Sources, 21 Sources, 22 Sources, 23 Sources, 24 Sources, 25 Sources, 26 Sources, 27 Sources …]
