# Supplementary material
Source: publisher figshare collection journal article supplement (https://gsapubs.figshare.com/ndownloader/files/23319257)
Supplement: Supplementary file 1 [file 23319257 › FileDR10. DZnmf_fact_source_rossetta_stone.xlsx]

## Sheet: Sheet1
Leary, R.J., Umhoefer, P., Smith, M.E., Smith, T.M., Saylor, J.E., Riggs, N., Burr, G., Lodes, E., Foley, D., Licht, A., Mueller, M.A., and Baird, C., 2020, Provenance of Pennsylvanian–Permian sedimentary rocks associated with the Ancestral Rocky Mountains orogeny in southwestern Laurentia: Implications for continental-scale Laurentian sediment transport systems: Lithosphere, https://doi.org/10.1…
factorized source names
manuscript & figures	PDP 8 source run	KDE (20 My) 8 source run	KDE (50 My) 8 source run
A	6	1	6
B	7	6	7
C	8	4	8
D	2	2	2
E	1	7	1
F	5	3	5
G	3	5	3
H	4	8	4
